# Supplementary material for: LC‐MS/MS‐Based Quantitative Proteomics Analysis of Different Stages of Non‐Small‐Cell Lung Cancer
Source: Hindawi journal article supplement (doi:10.1155/2021/5561569), 2021-01-01
Supplement: f1 [file 5561569.f1.pdf]

| Uniprot Accession Number | Protein                   | protein amino acid sequence | protein amino acid sequence matching degree (%) | number of identified polypeptides | total number of identified polypeptides | characteristic polypeptide number identified | length of amino acid | The molecular weight KDa | isoelectric point | relative abundance of normalized protein - sample 113 | relative abundance of normalized protein - sample 114 | relative abundance of normalized protein - sample 115 | relative abundance of normalized protein - sample 116 | relative abundance of normalized protein - sample 117 | relative abundance of normalized protein - sample 118 | relative abundance of normalized protein - sample 119 | relative abundance of normalized protein - sample 121 |
|--------------------------|---------------------------|-----------------------------|-------------------------------------------------|-----------------------------------|-----------------------------------------|----------------------------------------------|----------------------|--------------------------|-------------------|-------------------------------------------------------|-------------------------------------------------------|-------------------------------------------------------|-------------------------------------------------------|-------------------------------------------------------|-------------------------------------------------------|-------------------------------------------------------|-------------------------------------------------------|
| COJYY2                   | Apolipoprotein B-48       | MDPPRPAL                    | 48                                              | 227                               | 8770                                    | 178                                          | 4563                 | 515.2                    | 7.05              | 587089.8                                              | 722432.2                                              | 577726.5                                              | 553022.3                                              | 631905.3                                              | 553297.9                                              | 487383.6                                              | 510456.9                                              |
| V9HWA9                   | Epididymis                | MGPTSGPS                    | 65                                              | 117                               | 13443                                   | 117                                          | 1663                 | 187                      | 6.4               | 1038496                                               | 987768                                                | 1014543                                               | 1059000                                               | 1036689                                               | 1058344                                               | 1125990                                               | 1086362                                               |
| A0A140TA                 | Compleme                  | MRLWGLI                     | 48                                              | 76                                | 5311                                    | 1                                            | 1698                 | 187.5                    | 7.33              | 10298.9                                               | 11246.3                                               | 10190.4                                               | 9787.3                                                | 10555.8                                               | 9545.9                                                | 7018.6                                                | 10069.7                                               |
| A0A140TA                 | Compleme                  | MRLWGLI                     | 47                                              | 75                                | 5311                                    | 0                                            | 1698                 | 187.6                    | 7.12              |                                                       |                                                       |                                                       |                                                       |                                                       |                                                       |                                                       |                                                       |
| P0C0L4                   | Compleme                  | MRLWGLI                     | 47                                              | 78                                | 5222                                    | 4                                            | 1744                 | 192.7                    | 7.08              | 354515.7                                              | 358550.6                                              | 353533.8                                              | 371096.1                                              | 369917.8                                              | 392042.8                                              | 352593.5                                              | 379640.7                                              |
| A8K5A4                   | cDNA FLJ76                | MKILILGIFL                  | 49                                              | 48                                | 2852                                    | 3                                            | 1065                 | 122.1                    | 5.74              | 184669.2                                              | 167773                                                | 172794.9                                              | 189477.9                                              | 181011.4                                              | 192480.9                                              | 188787.6                                              | 181927.1                                              |
| P08603                   | Compleme                  | MRLAKIIC                    | 58                                              | 65                                | 2223                                    | 2                                            | 1231                 | 139                      | 6.61              | 139326.8                                              | 138368.7                                              | 152055.5                                              | 147415.7                                              | 134161.2                                              | 124277.4                                              | 143670                                                | 127138.9                                              |
| A8K5T0                   | cDNA FLJ75                | MRLAKIIC                    | 57                                              | 64                                | 2215                                    | 1                                            | 1231                 | 138.9                    | 6.71              | 2166.5                                                | 1478.4                                                | 1667                                                  | 1764.5                                                | 1600.3                                                | 1443.2                                                | 1747.7                                                | 1595.6                                                |
| Q7Z7Q0                   | APOB protein              | MDPPRPAL                    | 58                                              | 50                                | 3404                                    | 1                                            | 825                  | 92.3                     | 7.42              | 378.4                                                 | 434.3                                                 | 176                                                   | 338.2                                                 | 290.4                                                 | 163                                                   | 248.4                                                 | 369.3                                                 |
| E9PFZ2                   | Ceruloplas                | MKILILGIFL                  | 53                                              | 46                                | 2570                                    | 1                                            | 946                  | 108.8                    | 5.77              | 305.6                                                 | 1344.1                                                | 340.1                                                 | 294.9                                                 | 245.3                                                 | 225.6                                                 | 226.5                                                 | 232                                                   |
| P01023                   | Alpha-2-ma                | MGKNKLLH                    | 50                                              | 60                                | 2148                                    | 54                                           | 1474                 | 163.2                    | 6.46              | 159242.4                                              | 150022.1                                              | 148585.9                                              | 127199.8                                              | 139287.4                                              | 196290.4                                              | 150833.5                                              | 155893                                                |
| B4E1Z4                   | cDNA FLJ55                | MGPLMVL                     | 46                                              | 58                                | 2410                                    | 38                                           | 1266                 | 140.9                    | 7.18              | 168887.5                                              | 175330.4                                              | 170379.3                                              | 181366.8                                              | 186553.2                                              | 182496                                                | 179532.4                                              | 179991.2                                              |
| P02768                   | Serum album               | MKWVTFIS                    | 62                                              | 47                                | 4176                                    | 47                                           | 609                  | 69.3                     | 6.28              | 393627.8                                              | 415295.5                                              | 553515.2                                              | 401168.8                                              | 313800.8                                              | 273544.9                                              | 216497.6                                              | 374998.6                                              |
| P00747                   | Plasminogen               | MEHKEVVL                    | 64                                              | 54                                | 1676                                    | 46                                           | 810                  | 90.5                     | 7.24              | 123328                                                | 118392.6                                              | 116615.2                                              | 117254.4                                              | 115644.8                                              | 104325.5                                              | 105844.6                                              | 110712.8                                              |
| P02790                   | Hemopexin                 | MARVLGAI                    | 64                                              | 31                                | 5337                                    | 31                                           | 462                  | 51.6                     | 7.02              | 374618.6                                              | 386591                                                | 389342.2                                              | 396054.9                                              | 408398.8                                              | 392817.7                                              | 388013.2                                              | 407277.3                                              |
| P00738                   | Haptoglobin               | MSALGAVI                    | 57                                              | 27                                | 2184                                    | 12                                           | 406                  | 45.2                     | 6.58              | 185102                                                | 162600.1                                              | 155639.9                                              | 279577.3                                              | 162525.6                                              | 258436.5                                              | 410792.3                                              | 185933.7                                              |
| A0A024R3                 | Apolipoprotein B-48       | MKAAVTL                     | 86                                              | 33                                | 4430                                    | 33                                           | 267                  | 30.8                     | 5.76              | 338583                                                | 381625.8                                              | 366565                                                | 373110.1                                              | 364223.9                                              | 375076                                                | 391751.5                                              | 411885.3                                              |
| P00734                   | Prothrombin               | MAHVRGL                     | 55                                              | 32                                | 1104                                    | 32                                           | 622                  | 70                       | 5.9               | 69844.1                                               | 67971.2                                               | 72856.6                                               | 63897.5                                               | 65950.1                                               | 56143.8                                               | 58040.4                                               | 57305.1                                               |
| B4E1C2                   | Kininogen                 | MKLITILFLC                  | 40                                              | 32                                | 1754                                    | 5                                            | 644                  | 71.9                     | 6.81              | 125717                                                | 122596.9                                              | 124775.5                                              | 130027.4                                              | 132243.9                                              | 130159.7                                              | 124968.7                                              | 131253.4                                              |
| P01031                   | Compleme                  | MGLLGILCF                   | 36                                              | 63                                | 1230                                    | 63                                           | 1676                 | 188.2                    | 6.52              | 94890.7                                               | 90259.9                                               | 89862.7                                               | 87867                                                 | 94067.8                                               | 91781.4                                               | 92978.4                                               | 93176.8                                               |
| D3DNU8                   | Kininogen                 | MKLITILFLC                  | 54                                              | 29                                | 1813                                    | 2                                            | 427                  | 47.8                     | 6.65              | 6418.8                                                | 6744.1                                                | 6171.8                                                | 6016                                                  | 6433                                                  | 9059.8                                                | 8373.3                                                | 7787.9                                                |
| B4E1B2                   | cDNA FLJ53                | MRLAVGAI                    | 63                                              | 47                                | 1180                                    | 5                                            | 678                  | 74.8                     | 7.12              | 92039.8                                               | 81713.4                                               | 90197.9                                               | 70892.5                                               | 76534                                                 | 83395                                                 | 66649.1                                               | 83286.1                                               |
| E9KL23                   | Epididymis                | MPSSVSWV                    | 61                                              | 31                                | 1738                                    | 1                                            | 418                  | 46.7                     | 5.59              | 8613.5                                                | 5499.6                                                | 5387.8                                                | 4010.7                                                | 5925.8                                                | 6670.1                                                | 4887.9                                                | 6306.2                                                |
| A0A024R6                 | Alpha-1-antitrypsin       | MPSSVSWV                    | 61                                              | 31                                | 1672                                    | 1                                            | 418                  | 46.7                     | 5.59              | 129336.8                                              | 145830.8                                              | 133687.4                                              | 163476                                                | 143911.9                                              | 158637.4                                              | 254797.8                                              | 165755.8                                              |
| A0A0K0K1                 | Epididymis                | MRLAVGAI                    | 59                                              | 44                                | 1153                                    | 2                                            | 698                  | 77                       | 7.21              | 905.6                                                 | 975.5                                                 | 1107.8                                                | 873                                                   | 818.1                                                 | 1068.3                                                | 849.7                                                 | 866.1                                                 |
| D6RF35                   | Vitamin D-binding protein | MKRVLVLL                    | 62                                              | 32                                | 2227                                    | 2                                            | 476                  | 53                       | 5.52              | 191458.5                                              | 193095.1                                              | 175613.7                                              | 171725                                                | 181511.4                                              | 200116.5                                              | 203654.9                                              | 203990.6                                              |
| V9HWI6                   | Epididymis                | MKRVLVLL                    | 66                                              | 32                                | 2121                                    | 2                                            | 474                  | 52.9                     | 5.54              | 1493.4                                                | 1742                                                  | 1355.4                                                | 1572.2                                                | 2818.7                                                | 2236                                                  | 1573.4                                                | 1938.8                                                |
| D3DRR6                   | Inter-alpha               | MKRLTCFFI                   | 32                                              | 32                                | 1638                                    | 32                                           | 947                  | 106.5                    | 6.95              | 108481.7                                              | 98996.5                                               | 99369.2                                               | 94019.8                                               | 105151.6                                              | 106137.5                                              | 95323.2                                               | 108810.6                                              |
| B2RMS9                   | Inter-alpha               | MKPPRPVF                    | 35                                              | 32                                | 1588                                    | 32                                           | 930                  | 103.3                    | 6.98              | 108110.8                                              | 103576.1                                              | 102139.3                                              | 101346.1                                              | 109288.1                                              | 106762.4                                              | 106066.8                                              | 104677.5                                              |
| A8K2T4                   | cDNA FLJ78                | MKVISLFILY                  | 50                                              | 37                                | 618                                     | 4                                            | 843                  | 93.3                     | 6.51              | 39819.6                                               | 35815.5                                               | 37899.4                                               | 38127.9                                               | 37936.9                                               | 36598.8                                               | 35816.4                                               | 34968                                                 |
| B7Z539                   | cDNA FLJ56                | MDGAMGF                     | 40                                              | 23                                | 951                                     | 16                                           | 645                  | 72.1                     | 7.68              | 54625.6                                               | 50116.6                                               | 55433.1                                               | 58397.6                                               | 56789.4                                               | 51279.7                                               | 46599.2                                               | 53820                                                 |
| P06727                   | Apolipoprotein B-48       | MFLKAVVL                    | 70                                              | 36                                | 1655                                    | 36                                           | 396                  | 45.4                     | 5.38              | 121784.2                                              | 122790                                                | 118549.5                                              | 111855.3                                              | 125959.3                                              | 118246.5                                              | 98547                                                 | 132070.1                                              |
| P04003                   | C4b-binding protein       | MHPPKTPS                    | 59                                              | 28                                | 1262                                    | 1                                            | 597                  | 67                       | 7.3               | 98140.4                                               | 87061.7                                               | 94314.1                                               | 96031.3                                               | 95727.1                                               | 96432.8                                               | 93592.4                                               | 89101.1                                               |
| B2R6W1                   | cDNA, FLJ9                | MKVISLFILY                  | 48                                              | 35                                | 595                                     | 2                                            | 843                  | 93.5                     | 6.48              | 467.6                                                 | 371.3                                                 | 403.2                                                 | 355.5                                                 | 366.1                                                 | 384.4                                                 | 402.6                                                 | 340                                                   |
| B4E1D8                   | cDNA FLJ51                | MDITLTETF                   | 66                                              | 28                                | 1251                                    | 1                                            | 536                  | 60.4                     | 6.65              | 419.3                                                 | 405.5                                                 | 393                                                   | 441.7                                                 | 454.7                                                 | 390.7                                                 | 344.8                                                 | 356.1                                                 |

|          |              |           |    |    |      |    |      |       |      |          |          |         |          |          |          |          |          |
|----------|--------------|-----------|----|----|------|----|------|-------|------|----------|----------|---------|----------|----------|----------|----------|----------|
| P00739   | Haptoglobi   | MSDLGAVI  | 53 | 21 | 1147 | 6  | 348  | 39    | 7.09 | 2606.9   | 2512.7   | 2255.3  | 2714.9   | 2471.1   | 3397.7   | 4403     | 2635.5   |
| B7Z1F8   | cDNA FLJ53   | MCPEDSL   | 67 | 18 | 1520 | 3  | 270  | 30.4  | 7.99 | 6148.8   | 5133     | 6345.8  | 5999.2   | 5232.9   | 5756.8   | 5222.4   | 5945     |
| P06396   | Gelsolin OS  | MAPHRPAI  | 41 | 30 | 734  | 28 | 782  | 85.6  | 6.28 | 51360.2  | 48208.4  | 50016.7 | 46518.3  | 50644.9  | 50760.1  | 44495    | 53072.9  |
| D9IWP9   | Beta-2-glyc  | GRTCPKPD  | 53 | 17 | 1394 | 17 | 326  | 36.2  | 8    | 95869.3  | 94684.3  | 92089.5 | 92442.1  | 97157.4  | 95290.3  | 97045.8  | 95095.7  |
| A0A024R9 | Serpin pep   | MYSNVIGT  | 44 | 28 | 1040 | 28 | 464  | 52.6  | 6.71 | 81924    | 75341.2  | 73519.1 | 66972.7  | 79640.7  | 77286.2  | 59152.2  | 76446.5  |
| B3KS79   | cDNA FLJ35   | MKIHYSRQ  | 34 | 19 | 1335 | 19 | 448  | 50.6  | 5.63 | 93851    | 98190.2  | 91704   | 98831.5  | 103081.2 | 95366.8  | 132515.7 | 99858    |
| P13671   | Compleme     | MARRSVLY  | 39 | 35 | 538  | 4  | 934  | 104.7 | 6.76 | 36577.2  | 33403.3  | 34161.9 | 36176    | 36281.2  | 33438.1  | 34559.2  | 34641.2  |
| E9PGN7   | Plasma pro   | MGAGPGR   | 27 | 17 | 1413 | 17 | 543  | 59.5  | 6.76 | 100248.8 | 112257.1 | 98724.4 | 106678.1 | 114992.3 | 110430.4 | 101300.1 | 110273.8 |
| P02760   | Protein AM   | MRSLGALL  | 47 | 14 | 816  | 14 | 352  | 39    | 6.25 | 40442    | 36134.6  | 39749.4 | 40433.6  | 41020    | 38398    | 34490.9  | 38024    |
| A8K8Z4   | cDNA FLJ78   | MARRSVLY  | 36 | 32 | 516  | 1  | 934  | 104.6 | 6.62 | 91.3     | 102.6    | 84.4    | 91.7     | 76       | 104.5    | 85.7     | 91.7     |
| B2R8I2   | cDNA, FLJ9   | MKALIAALI | 51 | 21 | 701  | 1  | 525  | 59.5  | 7.44 | 56488.4  | 55925.9  | 42986.9 | 48963.1  | 56480.5  | 61840.2  | 50180    | 53687.5  |
| H0YAC1   | Plasma kall  | XSEDCEVAI | 46 | 30 | 491  | 30 | 686  | 76.8  | 8.06 | 34217.8  | 32918    | 34183.6 | 32889.7  | 34399    | 32603.1  | 29661.8  | 33082.6  |
| P04196   | Histidine-ri | MKALIAALI | 51 | 21 | 685  | 1  | 525  | 59.5  | 7.5  | 866.1    | 992.4    | 590.2   | 622.6    | 688.2    | 799.8    | 706.1    | 661.8    |
| P07358   | Compleme     | MKNSRTW   | 47 | 25 | 410  | 25 | 591  | 67    | 8.13 | 24943.9  | 24633.6  | 24581.7 | 24823.5  | 24915.6  | 24972.2  | 23582.2  | 25346.9  |
| P43652   | Afamin OS    | MKLLKLTGI | 48 | 33 | 792  | 33 | 599  | 69    | 5.9  | 62649.1  | 58267.1  | 59622.5 | 58119.3  | 61682.8  | 62913.2  | 54287.5  | 60761.3  |
| P06681   | Compleme     | MGPLMVL   | 40 | 26 | 426  | 6  | 752  | 83.2  | 7.42 | 5761.7   | 5226.7   | 5861.4  | 5486.3   | 5452.7   | 5408.6   | 5137.8   | 5096.4   |
| P04275   | von Willeb   | MIPARFAG  | 23 | 51 | 243  | 2  | 2813 | 309.1 | 5.48 | 13089.5  | 11473.5  | 12553.1 | 13082    | 13206.5  | 13496.9  | 11111.4  | 10196    |
| A0A024R9 | Thrombosy    | MGLAWGL   | 37 | 39 | 387  | 1  | 1170 | 129.3 | 4.94 | 26614.2  | 21742.9  | 25643.9 | 21725    | 27021.2  | 22529.8  | 20044.7  | 21666.3  |
| P07996   | Thrombosy    | MGLAWGL   | 37 | 39 | 390  | 1  | 1170 | 129.3 | 4.94 | 557.4    | 499.6    | 559     | 467      | 606.6    | 606.1    | 458.5    | 392.8    |
| P10909   | Clusterin C  | MMKTLLLF  | 39 | 18 | 653  | 18 | 449  | 52.5  | 6.27 | 50095.5  | 45302.4  | 48175.9 | 48440.7  | 47018.7  | 34883.3  | 34107.1  | 33598.7  |
| O75882   | Attractin O  | MVAAAAA   | 25 | 32 | 349  | 32 | 1429 | 158.4 | 7.31 | 27658.2  | 25777.2  | 25986.1 | 25151.2  | 26915.2  | 24672.1  | 23733.1  | 25522.8  |
| E7ETH0   | Compleme     | MKLLHVFL  | 35 | 19 | 499  | 5  | 591  | 66.6  | 7.59 | 28620.6  | 26667.1  | 27252.9 | 26287.2  | 27657.8  | 25695.2  | 27742.1  | 26360    |
| L8E853   | von Willeb   | MIPARFAG  | 23 | 50 | 239  | 1  | 2715 | 298.2 | 5.48 |          |          |         |          |          |          |          |          |
| B3KNX0   | cDNA FLJ30   | MWCIVLFS  | 41 | 23 | 366  | 23 | 688  | 76.6  | 4.96 | 27673.9  | 25972.1  | 24866.1 | 26889    | 25674.2  | 23715.2  | 25775    | 24353    |
| A0A024R4 | Fibronectin  | MLRGPGPC  | 22 | 43 | 227  | 43 | 2355 | 259   | 5.73 | 14350.7  | 12920.5  | 17208   | 13008.3  | 18122.1  | 8789.5   | 7557     | 8653     |
| B4DPQ0   | Compleme     | MSVRFRC   | 39 | 24 | 381  | 22 | 719  | 81.8  | 6.37 | 29398.6  | 29623.9  | 30198.6 | 30114.2  | 28399.3  | 25563.7  | 28589.3  | 27059.9  |
| P02649   | Apolipopro   | MKVLWAA   | 61 | 22 | 910  | 20 | 317  | 36.1  | 5.73 | 60795.2  | 53606.3  | 61843.3 | 62405.6  | 66560.6  | 58524.1  | 55467.3  | 54616    |
| P07357   | Compleme     | MFAVVFIL  | 41 | 22 | 359  | 22 | 584  | 65.1  | 6.47 | 21076    | 19665.2  | 20194.4 | 19189.5  | 20228.2  | 19921.3  | 19774.3  | 19863.5  |
| A0A024R0 | Compleme     | MSACWSF   | 36 | 23 | 501  | 23 | 559  | 63.2  | 5.52 | 28186.5  | 29862.6  | 26992.6 | 31248.7  | 30833.4  | 31964.7  | 39963.3  | 31276.8  |
| Q6LAM1   | Heavy chain  | KVTYTSQEI | 50 | 16 | 369  | 2  | 321  | 35.9  | 7.59 | 5884.2   | 5922.3   | 5458.6  | 5879.3   | 6019     | 6552.1   | 9038.4   | 7000     |
| P05546   | Heparin co   | MKHSLNAL  | 42 | 22 | 614  | 22 | 499  | 57    | 6.9  | 42058.8  | 39849.4  | 38495   | 41473.5  | 42452    | 44464.2  | 39529.8  | 40235.4  |
| Q9UNU2   | Compleme     | HRGRTLDF  | 64 | 15 | 894  | 3  | 354  | 38.1  | 8.53 | 2438.3   | 2216     | 2211.7  | 1819.1   | 2243     | 1953.8   | 2485     | 2086.8   |
| V9HWD8   | Epididymis   | MSMLVVF   | 41 | 13 | 1100 | 8  | 495  | 54.2  | 5.86 | 85465.5  | 85173.4  | 82675.7 | 85248.3  | 87032.2  | 83186    | 82018.4  | 87354.8  |
| A0A0S2Z4 | Protein S is | MRVLGGR   | 34 | 21 | 322  | 21 | 708  | 78.8  | 5.74 | 20521.9  | 19479.9  | 20695.3 | 18904.4  | 20998.2  | 20174.6  | 20330.7  | 20335.7  |
| D9ZGG2   | Vitronectin  | MAPLRPLL  | 24 | 10 | 849  | 10 | 478  | 54.3  | 5.8  | 47676.1  | 42103.8  | 50280.8 | 50872    | 50370.3  | 44782.5  | 40512.9  | 45241.8  |
| B7Z8Q2   | cDNA FLJ55   | MFAGCFFF  | 26 | 12 | 917  | 12 | 433  | 46.6  | 6.28 | 72510.6  | 71430.7  | 69072.4 | 68315.1  | 75454.7  | 69386.5  | 66683.6  | 78902.1  |
| D9YZU5   | Beta-globin  | MVHLTPEE  | 79 | 12 | 430  | 1  | 147  | 16    | 7.28 | 26762    | 25508.7  | 21785.1 | 27519.4  | 20787.3  | 30161.5  | 30166.4  | 26416.6  |
| B7Z8B6   | cDNA FLJ54   | MNKNVVF   | 27 | 10 | 354  | 3  | 623  | 69.5  | 6.16 | 4851.3   | 3182.4   | 3426.6  | 2914.7   | 3116.9   | 4486.4   | 3978.8   | 3715.2   |
| A0A1B0GU | Ig mu chain  | GSASAPTLF | 38 | 16 | 591  | 3  | 474  | 51.9  | 6.15 | 33261.6  | 33963.5  | 33291.6 | 31512.1  | 39637.9  | 55273.6  | 42527.6  | 41758.8  |
| B2R950   | cDNA, FLJ9   | MRKDRLLH  | 19 | 23 | 307  | 17 | 1482 | 163.8 | 6.38 | 2645.4   | 2669.2   | 2807.5  | 2688     | 3024     | 2831.3   | 3108.6   | 2893     |
| Q96PD5   | N-acetylm    | MAQGVLV   | 26 | 10 | 366  | 10 | 576  | 62.2  | 7.55 | 20449.1  | 16845.4  | 17634.1 | 17893.7  | 18152.3  | 17621.4  | 16026.7  | 18131.8  |
| P02763   | Alpha-1-ac   | MALSWVL   | 45 | 9  | 562  | 6  | 201  | 23.5  | 5.02 | 20978.4  | 23424.7  | 17359   | 26223.1  | 21535.6  | 24203.1  | 45114    | 21588.2  |

|          |              |           |    |    |     |    |      |       |      |         |         |         |         |         |         |         |         |
|----------|--------------|-----------|----|----|-----|----|------|-------|------|---------|---------|---------|---------|---------|---------|---------|---------|
| B0AZL7   | cDNA, FLJ7   | MALRKGGI  | 37 | 19 | 355 | 19 | 605  | 66    | 6.79 | 22324.3 | 19098.3 | 20124.5 | 19414.7 | 21036   | 19426.1 | 16382.5 | 18319.3 |
| B2R815   | cDNA, FLJ9   | MHLIDYLLI | 38 | 15 | 289 | 15 | 427  | 48.5  | 7.75 | 20326.1 | 19314.7 | 17136.1 | 15861.9 | 19134.1 | 18435.3 | 13815.6 | 18523.7 |
| P08697   | Alpha-2-an   | MALLWGLI  | 32 | 16 | 311 | 16 | 491  | 54.5  | 6.29 | 15568.9 | 15471.1 | 16057.6 | 15651.7 | 15778.6 | 15332.5 | 15477.2 | 16208.5 |
| P25311   | Zinc-alpha-  | MVRMVPV   | 51 | 18 | 353 | 18 | 298  | 34.2  | 6.05 | 24197   | 22776.3 | 22025   | 20191.2 | 24868.6 | 21172.2 | 17749   | 22823.9 |
| Q86TT1   | Full-length  | MQGTDEH   | 41 | 14 | 575 | 1  | 375  | 41.2  | 6.79 | 731.5   | 612.5   | 656.3   | 623.5   | 686.7   | 818     | 646.6   | 628.3   |
| V9HW68   | Epididymis   | MELGLSWI  | 42 | 15 | 216 | 1  | 470  | 51.7  | 7.75 | 14200.7 | 13471.4 | 14091.7 | 14781.3 | 14841.2 | 12780.1 | 15179.6 | 14318   |
| Q06033   | Inter-alpha  | MAFAWWI   | 18 | 14 | 267 | 14 | 890  | 99.8  | 5.74 | 13567.8 | 12959.8 | 12149.5 | 12249.6 | 12309.6 | 12294.9 | 12842.5 | 12468.4 |
| P80108   | Phosphatic   | MSAFRLWI  | 24 | 20 | 227 | 20 | 840  | 92.3  | 6.37 | 11082   | 10784.2 | 10919.1 | 10552.3 | 10448.7 | 10629.6 | 9586.6  | 9864.1  |
| P07360   | Compleme     | MLPPGTAT  | 58 | 11 | 203 | 11 | 202  | 22.3  | 8.31 | 10529.2 | 9986.8  | 10975.9 | 10507.7 | 10028.2 | 10438.8 | 9234.4  | 10063.5 |
| P22792   | Carboxype    | MLPGAWL   | 22 | 11 | 310 | 11 | 545  | 60.5  | 5.99 | 18835.2 | 18865.2 | 17056.8 | 16192.8 | 17940.2 | 16797.5 | 14238.6 | 16767.1 |
| A0A140VK | Testis tissu | MQALVLLL  | 35 | 14 | 372 | 14 | 418  | 46.3  | 6.38 | 25131.6 | 22440.4 | 22366.6 | 20490.3 | 23660.7 | 22065.7 | 21306.7 | 22611   |
| P51884   | Lumican O    | MSLSAFTLF | 36 | 11 | 361 | 11 | 338  | 38.4  | 6.61 | 21871.6 | 20178.2 | 20998.2 | 20168.7 | 21854.5 | 20957.9 | 18878.5 | 21478.9 |
| A0A0A0MF | Coagulatio   | MFPGCPRL  | 15 | 31 | 140 | 30 | 2229 | 252.1 | 6.05 | 8192.9  | 7006.1  | 7385.3  | 6954.2  | 8063.6  | 6384.5  | 6217.3  | 6480.2  |
| Q59EP2   | Angiotensi   | VLQQKGM   | 26 | 13 | 474 | 13 | 491  | 53.7  | 6.42 | 24341.2 | 23979.5 | 23177.3 | 23539.2 | 25181.7 | 23425   | 22223.6 | 24089.4 |
| B2R582   | cDNA, FLJ9   | MELWGAY   | 57 | 10 | 217 | 1  | 202  | 22.5  | 6.04 | 921.9   | 782     | 830.3   | 714.9   | 798.1   | 808.3   | 819.5   | 798     |
| Q4TZM4   | Hemoglobi    | TPEEKSAVT | 89 | 9  | 235 | 2  | 101  | 11    | 6.52 | 1405    | 1277.4  | 979.5   | 1322.2  | 935.1   | 1697.9  | 1700.3  | 1332.1  |
| Q6MZQ6   | Putative ur  | MEFGLSWI  | 35 | 13 | 199 | 2  | 475  | 52    | 8.06 |         |         |         |         |         |         |         |         |
| P27169   | Serum para   | MAKLIALT  | 33 | 9  | 411 | 7  | 355  | 39.7  | 5.22 | 24841.5 | 26246   | 25042.9 | 24302   | 27227.6 | 26242.8 | 22453.9 | 26425.9 |
| D6RF20   | Vitamin D-   | MKRVLVLL  | 76 | 10 | 581 | 1  | 145  | 16.1  | 5.83 | 28.9    | 18.6    | 31.5    | 25.4    | 23.9    | 27.1    | 21.2    | 24.1    |
| Q96K68   | cDNA FLJ14   | MELGLRWI  | 29 | 12 | 184 | 4  | 494  | 53.1  | 6.86 | 9530.9  | 9767.8  | 10313.7 | 9694.6  | 9181.8  | 9114    | 12195.3 | 9509.7  |
| G3XAK1   | Hepatocyte   | MGLWWVI   | 34 | 20 | 129 | 20 | 725  | 81.9  | 7.8  | 6901.6  | 6318.4  | 6943.5  | 6491.8  | 6537.2  | 5956.3  | 5849.2  | 6404.4  |
| A0A024R2 | C-type lect  | MELWGAY   | 57 | 10 | 189 | 1  | 202  | 22.5  | 5.67 | 8337.9  | 7454.1  | 7456.1  | 6832.4  | 8007.7  | 7034    | 6269.8  | 7606    |
| B2R9F2   | cDNA, FLJ9   | MPLLLYTCL | 23 | 8  | 306 | 8  | 405  | 45.1  | 6.04 | 24324.2 | 24773.4 | 18653.9 | 20418.2 | 23084.3 | 23221.8 | 21849.1 | 21182.2 |
| P05543   | Thyroxine-   | MSPFLYVLI | 29 | 13 | 196 | 13 | 415  | 46.3  | 6.3  | 10969   | 11223.3 | 10323.5 | 10070   | 11408.6 | 11465.7 | 10219.8 | 10522.1 |
| A0N071   | Delta globi  | MVHLTPEE  | 57 | 9  | 216 | 3  | 147  | 16    | 8.05 | 124.5   | 109     | 104.9   | 128.9   | 97.3    | 127.9   | 133     | 110.6   |
| P02753   | Retinol-bin  | MKWVWA    | 50 | 9  | 473 | 9  | 201  | 23    | 6.07 | 34673.7 | 31209.4 | 35599.5 | 34712.9 | 35446.5 | 33435.2 | 27320.1 | 33157.6 |
| C9JF17   | Apolipopro   | MFKQLSCIS | 31 | 7  | 421 | 7  | 215  | 24.1  | 5.6  | 26206.3 | 26020.4 | 27458.5 | 23217.7 | 27609.1 | 23713.6 | 21141.3 | 24386.8 |
| A8K1K1   | cDNA FLJ76   | MDPKLGRM  | 34 | 14 | 150 | 14 | 507  | 56.7  | 5.36 | 7542.4  | 7262.6  | 7434.9  | 6611.6  | 6953.1  | 6538.6  | 5646.1  | 6742.3  |
| A0A1K0GX | Globin C1 (  | MSAARPGI  | 51 | 7  | 179 | 7  | 177  | 19.2  | 9.77 | 14157.8 | 14141.1 | 9465.6  | 14883   | 10905.9 | 15034.8 | 18249.7 | 14723.1 |
| D6RAR4   | Hepatocyte   | MGRWAW    | 26 | 13 | 120 | 1  | 662  | 71.4  | 7.05 | 88.7    | 66.5    | 89.3    | 80.3    | 82.1    | 88.3    | 60.3    | 76.6    |
| Q16610   | Extracellul  | MGTTARA   | 28 | 13 | 102 | 13 | 540  | 60.6  | 6.71 | 4777.3  | 4009.6  | 4909.4  | 4730.8  | 4439.4  | 4352.6  | 3766.9  | 4476.7  |
| Q04756   | Hepatocyte   | MGRWAW    | 26 | 13 | 127 | 1  | 655  | 70.6  | 7.24 | 6577.1  | 5836.5  | 6665.3  | 5873.9  | 6133.9  | 5968.9  | 5362    | 6012.3  |
| Q8TCD0   | Uncharacte   | MRLPAQLL  | 41 | 6  | 154 | 1  | 239  | 26.2  | 8.06 | 415.3   | 418.3   | 400.5   | 341.9   | 406.3   | 519.1   | 440.6   | 466.9   |
| P03951   | Coagulatio   | MIFLYQVV  | 30 | 17 | 87  | 17 | 625  | 70.1  | 8.1  | 5192.9  | 4314.6  | 4788.6  | 4719.5  | 4850.2  | 4739    | 4267.9  | 4345.1  |
| Q03591   | Compleme     | MWLLSVI   | 28 | 10 | 157 | 1  | 330  | 37.6  | 7.39 | 1251.5  | 1403.4  | 1466.7  | 1296.1  | 1136.9  | 1164.7  | 1201    | 1223.8  |
| A0A0S2Z3 | Lectin gala  | MTPPRLFM  | 29 | 13 | 127 | 13 | 585  | 65.3  | 5.27 | 7320.9  | 6436    | 6925.7  | 6615.1  | 6572.9  | 8034.7  | 8214.9  | 6950.6  |
| Q6PIL8   | IGK@ prot    | METPAQLL  | 40 | 6  | 151 | 1  | 236  | 25.8  | 6.55 | 7606.5  | 6323.7  | 5824.9  | 5681    | 5845.4  | 8047.9  | 8245.1  | 7153.1  |
| P02746   | Compleme     | MMMKIPV   | 21 | 4  | 210 | 4  | 253  | 26.7  | 8.63 | 8778.3  | 8648.3  | 9690.7  | 9963.4  | 8865    | 8777.6  | 8280.1  | 8644    |
| A0A096LP | Protein SA   | MKLLTGLV  | 32 | 7  | 151 | 5  | 208  | 23.3  | 8.98 | 10688.6 | 10717.2 | 11896   | 12038.4 | 11679.4 | 11065.4 | 11844.1 | 10462.9 |
| Q6MZU6   | Putative ur  | MELGLRWI  | 36 | 13 | 102 | 4  | 464  | 51.1  | 7.71 | 4359    | 3634.2  | 4226.4  | 4274.9  | 4095.3  | 3280.3  | 3843.7  | 3853.2  |
| P02750   | Leucine-ric  | MSSWSRQ   | 28 | 9  | 294 | 9  | 347  | 38.2  | 6.95 | 19280.5 | 19204.6 | 19544.7 | 22329.2 | 19626.4 | 21509.2 | 27178.7 | 20434.1 |
| P48740   | Mannan-bi    | MRWLLLYY  | 28 | 15 | 103 | 15 | 699  | 79.2  | 5.49 | 7116.6  | 6236    | 6539.9  | 6207.5  | 6035.4  | 6160.2  | 5467.1  | 5616.9  |

|           |              |           |    |    |     |    |      |       |      |         |         |         |         |         |         |         |         |
|-----------|--------------|-----------|----|----|-----|----|------|-------|------|---------|---------|---------|---------|---------|---------|---------|---------|
| P02775    | Platelet ba  | MSLRD     | 45 | 7  | 212 | 7  | 128  | 13.9  | 8.79 | 17782.9 | 15010.3 | 17397.2 | 17472.2 | 19286.4 | 15447.8 | 15413.3 | 15640.4 |
| A6XNE2    | Compleme     | MHSWERL   | 39 | 7  | 65  | 7  | 260  | 27.8  | 7.25 | 3661.6  | 3079    | 3909.2  | 4144.5  | 3542.2  | 3244.9  | 2871.5  | 3098.3  |
| P02747    | Compleme     | MDVGPSSL  | 25 | 5  | 143 | 5  | 245  | 25.8  | 8.41 | 8248.2  | 8431.2  | 8152.3  | 8062.2  | 7885.1  | 7807.7  | 8072.6  | 8282.3  |
| P15169    | Carboxype    | MSDLLSVFI | 25 | 9  | 104 | 9  | 458  | 52.3  | 7.34 | 6941.6  | 6477.7  | 7257    | 7312.7  | 7140.8  | 6848.2  | 6112.5  | 6584.9  |
| P00742    | Coagulatio   | MGRPLHLV  | 30 | 14 | 112 | 14 | 488  | 54.7  | 5.94 | 8976.6  | 8245.7  | 8527.9  | 8393.9  | 8808    | 7701.3  | 7101.8  | 8124.9  |
| P19652    | Alpha-1-ac   | MALSWVL   | 47 | 10 | 310 | 7  | 201  | 23.6  | 5.11 | 19165   | 20571.4 | 17406.3 | 19854.6 | 18726.5 | 18554.9 | 27901.1 | 19263.5 |
| Q14520    | Hyaluronar   | MFARMSD   | 28 | 15 | 167 | 15 | 560  | 62.6  | 6.54 | 11316.7 | 10532.6 | 11084.5 | 11173.5 | 11337.9 | 10612   | 10238.1 | 11039.1 |
| F2RM37    | Coagulatio   | MQRVNMI   | 34 | 14 | 90  | 14 | 461  | 51.7  | 5.47 | 6699.2  | 6153.5  | 6191.1  | 6563.2  | 6383.7  | 6621.1  | 6072.5  | 6388.3  |
| Q96IY4    | Carboxype    | MKLCSLAV  | 24 | 10 | 161 | 10 | 423  | 48.4  | 7.71 | 12269.4 | 11550.9 | 13003.2 | 12811.5 | 12370   | 12796.3 | 10423.8 | 11789.6 |
| A2NUT2    | Lambda-ch    | MTCSPLLL  | 35 | 7  | 219 | 2  | 235  | 24.6  | 7.62 | 15187.4 | 14275.1 | 15722.5 | 15169.7 | 16572.9 | 14111.3 | 15719   | 14755.2 |
| O75636    | Ficolin-3 O  | MDLLWILP  | 21 | 7  | 227 | 7  | 299  | 32.9  | 6.67 | 17638.8 | 18165.6 | 16665   | 14385.8 | 16004   | 16769.9 | 14579.7 | 15367.2 |
| Q9NPP6    | Immunoglo    | PGKGLEWV  | 23 | 9  | 119 | 1  | 416  | 44.8  | 6.13 | 454.8   | 457.1   | 412.1   | 401.7   | 470.5   | 460.3   | 526.6   | 439.2   |
| Q567P1    | IGL@ prote   | MASFPLLL  | 38 | 7  | 205 | 1  | 235  | 24.8  | 7.3  | 1092.4  | 1442.3  | 1467.9  | 1287.8  | 1469.6  | 959     | 1225    | 1174.7  |
| A0A024R6  | Serpin pep   | MQLFLLCI  | 27 | 11 | 75  | 11 | 406  | 45.6  | 9.26 | 4175.3  | 3766.7  | 4461.6  | 4485.9  | 4064    | 4083.4  | 2912.8  | 3529    |
| H6VRG1    | Keratin 1 C  | MSRQFSSR  | 26 | 15 | 79  | 13 | 645  | 66.1  | 8.12 | 3451.6  | 3228.1  | 2797.8  | 3184.2  | 3565.9  | 2341.6  | 2726    | 2159.3  |
| A0A0R7FJH | Coagulatio   | MRALLLGG  | 20 | 8  | 53  | 8  | 615  | 67.8  | 7.8  | 2998.3  | 2976.7  | 2986.4  | 2883.8  | 2602.2  | 2378.2  | 2213.3  | 2366.7  |
| P20851    | C4b-bindin   | MFFWCAC   | 36 | 8  | 125 | 8  | 252  | 28.3  | 5.14 | 9027.5  | 8504    | 9754.4  | 9465.3  | 9543.2  | 9385.3  | 9386.6  | 8738.8  |
| P63261    | Actin, cyto  | MEEEEIALV | 46 | 12 | 73  | 5  | 375  | 41.8  | 5.48 | 5034.2  | 4421.8  | 4569    | 4498.6  | 4666.4  | 4301.8  | 3602.9  | 3679    |
| S6AWE6    | IgG L chain  | MAWFPLFI  | 32 | 6  | 201 | 1  | 215  | 22.9  | 8.43 | 446.9   | 440.7   | 498.9   | 495.6   | 479.3   | 490     | 532     | 443.9   |
| A0A024R0  | Apolipopro   | MRLFLSLPV | 40 | 7  | 232 | 7  | 83   | 9.3   | 8.47 | 21308.9 | 26544.7 | 20263.1 | 17356.9 | 22290.7 | 21967.1 | 21581   | 20202.7 |
| O00391    | Sulfhydryl   | MRRCNSSG  | 18 | 11 | 57  | 11 | 747  | 82.5  | 8.92 | 3092.7  | 2603.2  | 2911.4  | 2915    | 2811.2  | 2625.9  | 2246.1  | 2526.4  |
| P02743    | Serum amy    | MNKPLLWI  | 25 | 6  | 181 | 6  | 223  | 25.4  | 6.54 | 13581.8 | 12697.6 | 13609.2 | 12915.9 | 14808.5 | 11096.7 | 9575.8  | 12930.8 |
| P02776    | Platelet fac | MSSAAGFC  | 36 | 4  | 140 | 2  | 101  | 10.8  | 8.62 | 7328    | 14120.9 | 14224.7 | 9230.1  | 9519.2  | 9673.7  | 7847.5  | 7708.1  |
| P09172    | Dopamine     | MPALSRWV  | 25 | 13 | 57  | 13 | 617  | 69    | 6.42 | 2206.3  | 2263.1  | 2213    | 2303    | 1895.8  | 2180.4  | 1778.4  | 2072.2  |
| P43251    | Biotinidase  | MAHAHIQV  | 15 | 8  | 72  | 8  | 543  | 61.1  | 6.25 | 4160.3  | 3812.2  | 3998.6  | 3618    | 3739.1  | 3523.6  | 2741.5  | 3353.8  |
| P17936    | Insulin-like | MQRARPTI  | 36 | 9  | 124 | 9  | 291  | 31.7  | 8.69 | 5551.8  | 4713.9  | 4955.8  | 5015.6  | 5662.5  | 5154.3  | 4313.3  | 5061.2  |
| A6XGL1    | Transthyre   | MASHRLLL  | 27 | 4  | 117 | 4  | 184  | 20.2  | 5.24 | 7120.2  | 5982.7  | 6096.6  | 5738.3  | 6744    | 7894.5  | 6887.9  | 6699.7  |
| V9GYM3    | Apolipopro   | MCEQHPKI  | 32 | 6  | 446 | 6  | 133  | 14.9  | 8.27 | 44115.6 | 54074.9 | 48466.6 | 40529.6 | 47555   | 51115.9 | 44102   | 58257.6 |
| B4DPQ3    | cDNA FLJ5    | MAAGRRTV  | 15 | 8  | 53  | 8  | 517  | 57.4  | 7.53 | 3156    | 2875.5  | 3008.6  | 3181.3  | 3251    | 3124.7  | 2837.3  | 3019.2  |
| Q1HP67    | Lipoprotein  | MEHKEVVL  | 18 | 8  | 62  | 8  | 2040 | 226.4 | 6.07 | 3572.9  | 3229.5  | 5065.3  | 3792.2  | 3698.1  | 3973.9  | 3843.8  | 4008    |
| B2R888    | Monocyte     | MERASCLL  | 27 | 10 | 52  | 10 | 375  | 40    | 6.23 | 2126.2  | 1838    | 2245    | 2263    | 2124.1  | 1927.7  | 1746.3  | 1767.4  |
| Q6GMV7    | Uncharacte   | MASFPLLL  | 20 | 4  | 121 | 2  | 236  | 24.9  | 6.89 | 719.1   | 817     | 835.9   | 834.4   | 988     | 992.9   | 973.6   | 874.1   |
| P13645    | Keratin, typ | MMSVRYSSS | 19 | 12 | 89  | 9  | 584  | 58.8  | 5.21 | 6299.9  | 5141.4  | 5083.2  | 5122.4  | 5879.9  | 4691.1  | 4037.6  | 4187.6  |
| A0A024R1  | Apolipopro   | MRFKSHTV  | 23 | 9  | 68  | 9  | 414  | 45.8  | 6.29 | 6244    | 5517.6  | 7231.8  | 5956.6  | 5785.2  | 6265    | 6103    | 5734.4  |
| P36980    | Compleme     | MWLLSVVI  | 29 | 7  | 94  | 4  | 270  | 30.6  | 6.38 | 697.3   | 723     | 663.2   | 683.4   | 651.3   | 658.5   | 640.3   | 655.8   |
| O95445    | Apolipopro   | MFHQIWA   | 30 | 7  | 111 | 7  | 188  | 21.2  | 6.01 | 8296.5  | 9042    | 8840.9  | 8126.8  | 8617.6  | 8163.2  | 7562.5  | 8414.8  |
| Q6MZX7    | Putative ur  | MELMCKKI  | 16 | 6  | 73  | 2  | 476  | 52.4  | 7.77 | 1342.6  | 1183.7  | 1099.8  | 1043.5  | 1109.7  | 938.7   | 1199.3  | 1228.3  |
| P22352    | Glutathion   | MARLLQAS  | 40 | 8  | 137 | 8  | 226  | 25.5  | 8.13 | 10412   | 9504.2  | 9810.5  | 9756.1  | 9806.6  | 9337.8  | 8045.1  | 9294    |
| P04278    | Sex hormo    | MESRGPLA  | 31 | 10 | 62  | 10 | 402  | 43.8  | 6.71 | 3130.4  | 2779.4  | 2783.5  | 2998.7  | 2665.9  | 2874.3  | 2493.8  | 2653.1  |
| K7ER74    | Protein AP   | MSLLRNRL  | 26 | 6  | 180 | 4  | 178  | 20    | 6.64 | 13740.2 | 12868.2 | 16333.2 | 13350.9 | 13390.5 | 13986.8 | 16334.8 | 13980.3 |
| Q8NF17    | FLJ00385 p   | LWLWGREV  | 23 | 10 | 100 | 2  | 509  | 56.1  | 7.59 | 320.1   | 247.7   | 331.5   | 279.1   | 251.7   | 370.4   | 292.4   | 242.4   |
| S6BGE0    | IgG H chair  | MEFGLSWV  | 30 | 6  | 66  | 1  | 300  | 32.2  | 7.85 |         |         |         |         |         |         |         |         |



|           |              |           |    |    |     |    |      |      |      |         |         |         |         |         |         |         |         |
|-----------|--------------|-----------|----|----|-----|----|------|------|------|---------|---------|---------|---------|---------|---------|---------|---------|
| A0A0S2Z4I | Compleme     | MITEGAQA  | 23 | 9  | 41  | 9  | 469  | 51.2 | 7.9  | 4095.2  | 3644.8  | 3830.2  | 3920.4  | 4101.1  | 4187.3  | 3549.1  | 3322.3  |
| D3DNN4    | Carboxylic   | MSVQSNLC  | 15 | 11 | 79  | 11 | 643  | 72.8 | 7.55 | 5064.1  | 5240.3  | 5522.4  | 4966.8  | 5218    | 4797.5  | 4317.1  | 5130.5  |
| A0A161I20 | Lactoferrin  | MKLVFLVLI | 25 | 14 | 36  | 14 | 711  | 78.3 | 8.18 | 1147.8  | 1147.8  | 1211.5  | 1145.7  | 1138.4  | 1107.8  | 981.9   | 879.4   |
| P00915    | Carbonic an  | MASPDWG   | 36 | 7  | 55  | 7  | 261  | 28.9 | 7.12 | 2162.4  | 2609.2  | 1957.8  | 2055.7  | 1812.4  | 2027.6  | 2103.9  | 2002.4  |
| Q9UGM5    | Fetuin-B O   | MGLLLPLAI | 34 | 10 | 93  | 10 | 382  | 42   | 6.83 | 4351.3  | 3769.4  | 4123.9  | 4226.1  | 4171.8  | 4422.2  | 3868.4  | 4107.9  |
| A0A0F7G8  | Plasminoge   | MDHKEVVI  | 9  | 9  | 213 | 1  | 809  | 90.6 | 7.36 |         |         |         |         |         |         |         |         |
| Q8TCZ8    | Apolipopro   | RLGADMEI  | 54 | 3  | 161 | 1  | 57   | 6.7  | 9.98 | 476.4   | 343.4   | 456.2   | 890     | 571.4   | 559.4   | 698.9   | 380.9   |
| P11226    | Mannose-6    | MSLFPSLPL | 43 | 9  | 50  | 9  | 248  | 26.1 | 5.49 | 2010.3  | 1675.5  | 1836.5  | 1840.5  | 1926    | 1449.9  | 1492.7  | 1549.9  |
| P14780    | Matrix met   | MSLWQPLV  | 18 | 11 | 38  | 11 | 707  | 78.4 | 6.06 | 1945.1  | 1718.1  | 1892.8  | 1825.1  | 1878.1  | 1733.5  | 1533.9  | 1462.7  |
| Q9NZP8    | Compleme     | MPGPRVW   | 25 | 9  | 49  | 2  | 487  | 53.5 | 7.2  | 2606.4  | 2149.6  | 2431    | 2787.5  | 2422.7  | 2219.6  | 2302    | 2150.2  |
| A8K3K1    | cDNA FLJ7    | MCDDEETT  | 31 | 9  | 48  | 2  | 377  | 42   | 5.39 | 82.1    | 62.4    | 92.7    | 91.6    | 73.8    | 70.5    | 64.1    | 62.2    |
| P35527    | Keratin, ty  | MSCRQFSS  | 13 | 8  | 64  | 7  | 623  | 62   | 5.24 | 4828.9  | 4184.2  | 4681.3  | 4297.7  | 4160.6  | 3806.3  | 3832.4  | 3567.9  |
| A8KAJ3    | cDNA FLJ7    | MLKALFTI  | 24 | 10 | 39  | 10 | 493  | 54.6 | 5.14 | 1837.5  | 1648.2  | 1889.4  | 1779.4  | 1797    | 1394.9  | 1262.5  | 1343.2  |
| Q9UHG3    | Prenylcyste  | MGRVVAEI  | 22 | 9  | 36  | 9  | 505  | 56.6 | 6.18 | 1623    | 1448    | 1676.7  | 1553.9  | 1683.2  | 1543.2  | 1253.5  | 1396.4  |
| P10720    | Platelet fac | MSSAARSR  | 38 | 3  | 102 | 1  | 104  | 11.5 | 9.1  |         |         |         |         |         |         |         |         |
| S6B2A1    | IgG L chain  | MVLQTQVI  | 23 | 3  | 107 | 1  | 184  | 20.4 | 5.52 | 16.1    | 15.7    | 18.2    | 14.9    | 14      | 20.7    | 13.1    | 15.4    |
| B0YIW2    | Apolipopro   | MGTWGAF   | 47 | 4  | 206 | 4  | 117  | 12.8 | 8.18 | 15946.8 | 14299.1 | 16740.7 | 12479.1 | 14347.2 | 18360.1 | 14244.5 | 15931.1 |
| Q13790    | Apolipopro   | MTGLCGYS  | 8  | 2  | 52  | 2  | 326  | 35.4 | 5.64 | 2383.7  | 2210.3  | 2269.3  | 2033.8  | 2229.3  | 2090    | 1990.1  | 2324.8  |
| P35908    | Keratin, ty  | MSCQISCK  | 19 | 10 | 39  | 5  | 639  | 65.4 | 8    | 1259.7  | 955     | 943.1   | 1154.5  | 1302.1  | 818.6   | 752.4   | 701.5   |
| A0A024RD  | Lymphocyt    | MARGSVSE  | 18 | 10 | 31  | 10 | 627  | 70.2 | 5.43 | 1464.3  | 1267.8  | 1430.2  | 1427    | 1398    | 1284.8  | 1092.9  | 1247.4  |
| P40197    | Platelet gly | MLRGTLIC  | 18 | 8  | 31  | 8  | 560  | 60.9 | 9.63 | 992.6   | 1028.8  | 1166.6  | 1082.7  | 1030.5  | 1056.7  | 824.5   | 882     |
| P16070    | CD44 antig   | MDKFWWI   | 6  | 5  | 44  | 5  | 742  | 81.5 | 5.33 | 3521.4  | 3226.7  | 3652    | 3836.3  | 3838    | 3254.7  | 2930.4  | 3109.9  |
| A0A024R9  | Proteoglyc   | MAWKTLP   | 11 | 15 | 34  | 7  | 1404 | 151  | 9.5  | 4220.7  | 3217.9  | 3556.5  | 3585.4  | 3689.6  | 3751.3  | 3316.8  | 3044.2  |
| A2KBC2    | Anti-(ED-B   | EVQLLESG  | 21 | 4  | 45  | 2  | 238  | 25.2 | 7.71 | 1521.9  | 1577    | 1624.3  | 1472.1  | 1518.2  | 1839.6  | 1784.3  | 1576.5  |
| A5YAK2    | Apolipopro   | MSLLRNRL  | 30 | 5  | 79  | 3  | 127  | 14.6 | 9.13 | 4272.5  | 3741.9  | 4575.6  | 4034    | 4428.9  | 4371    | 4010.6  | 3983.5  |
| G3V2W1    | Protein Z-d  | MSRSTQEL  | 17 | 8  | 47  | 8  | 484  | 55.1 | 7.64 | 2292.1  | 2045.7  | 2003.8  | 1918.6  | 2069.7  | 2209.2  | 2075.1  | 1874.1  |
| A0A140VK  | Testicular s | MGPPGSPV  | 14 | 5  | 40  | 5  | 440  | 49.5 | 6.11 | 2812    | 2487.7  | 2736.8  | 2375.6  | 2635.4  | 2525.6  | 2230.7  | 2477.8  |
| O43866    | CD5 antige   | MALLFSLIL | 33 | 8  | 25  | 8  | 347  | 38.1 | 5.47 | 1335.5  | 1384.5  | 1606.8  | 1391.1  | 1358.8  | 1626.1  | 1351.8  | 1243.5  |
| P01591    | Immunoglo    | MKNHLLFV  | 34 | 5  | 58  | 5  | 159  | 18.1 | 5.24 | 3113    | 3322.8  | 3143.9  | 3267.3  | 3614.4  | 3594.7  | 3742.6  | 3550.8  |
| A8K3I0    | cDNA FLJ7    | MVPDTACV  | 13 | 7  | 17  | 6  | 757  | 82.8 | 4.59 | 652.6   | 540.7   | 621.8   | 590.1   | 595.1   | 527.4   | 506.8   | 549.7   |
| Q9H804    | cDNA FLJ1    | MPGPRVW   | 21 | 7  | 38  | 1  | 438  | 48   | 7.46 | 188.7   | 150.8   | 254.6   | 222.8   | 105.8   | 138.6   | 212.9   | 156.4   |
| B0YJC6    | Vitamin K-d  | MAGCVPLL  | 21 | 7  | 21  | 7  | 421  | 46.9 | 6.04 | 1103.8  | 1108.9  | 1160.9  | 1103.9  | 913.5   | 890.5   | 832.8   | 933.3   |
| Q6UXB8    | Peptidase i  | MHGSCSFL  | 11 | 5  | 28  | 5  | 463  | 49.4 | 5.39 | 905.3   | 840.5   | 932.9   | 822     | 835.3   | 645.3   | 631.8   | 818.1   |
| B3KWB5    | cDNA FLJ4    | MAPVSWIT  | 31 | 6  | 95  | 1  | 345  | 37   | 5.62 |         |         |         |         |         |         |         |         |
| P08709    | Coagulatio   | MVSQALRL  | 14 | 4  | 14  | 4  | 466  | 51.6 | 7.23 | 407.9   | 288.2   | 410     | 429.3   | 361     | 314.7   | 263.8   | 328     |
| V9HWB4    | Epididymis   | MKLSLVAA  | 12 | 7  | 17  | 7  | 654  | 72.3 | 5.16 | 779.4   | 658     | 736.6   | 713.6   | 670.1   | 707.2   | 577.6   | 597.3   |
| P02741    | C-reactive   | MEKLLCFLV | 24 | 6  | 38  | 6  | 224  | 25   | 5.63 | 830.7   | 1080.4  | 1074.1  | 1604.3  | 1017.9  | 930.1   | 4798.1  | 1082.9  |
| Q9UL72    | Myosin-rea   | EVQLVESG  | 25 | 2  | 40  | 1  | 118  | 12.9 | 6.58 | 481.2   | 387     | 447.7   | 412.4   | 424.7   | 408.7   | 401.4   | 364.5   |
| P49908    | Selenoprot   | MWRSLGL   | 14 | 6  | 50  | 6  | 381  | 43.2 | 7.87 | 3795    | 3274.3  | 3369.5  | 3224.2  | 3638.3  | 3596.3  | 2561.1  | 3441.9  |
| V9HW12    | Epididymis   | MASGNAR   | 37 | 7  | 28  | 7  | 198  | 21.9 | 5.97 | 1592.7  | 1603.5  | 1412.8  | 1548.9  | 1461.7  | 1574.2  | 1641.4  | 1538.3  |
| P07359    | Platelet gly | MPLLLLLLL | 12 | 6  | 55  | 6  | 652  | 71.5 | 6.29 | 2648.4  | 2443.9  | 2770    | 2679.9  | 2718.9  | 2386.6  | 2117.4  | 2084.5  |
| D3DQH8    | Secreted p   | MHFMCDL   | 17 | 5  | 27  | 5  | 315  | 36   | 4.88 | 2082.9  | 1926.3  | 2272.4  | 2198    | 1998.8  | 1964.4  | 1970.9  | 2098    |

|           |              |            |    |    |     |    |      |       |      |         |        |         |         |        |        |        |         |
|-----------|--------------|------------|----|----|-----|----|------|-------|------|---------|--------|---------|---------|--------|--------|--------|---------|
| P08779    | Keratin, ty  | MTTCSRQF   | 16 | 9  | 45  | 3  | 473  | 51.2  | 5.05 | 1891.4  | 1570.9 | 1774.5  | 1739.5  | 1762.6 | 1580.2 | 1378   | 1452.8  |
| P61626    | Lysozyme C   | MKALIVLGI  | 41 | 4  | 25  | 4  | 148  | 16.5  | 9.16 | 1304.7  | 1215.2 | 1329.5  | 1310.4  | 1321.3 | 1230.1 | 1218.8 | 1103.7  |
| A0A024R8  | L-selectin C | MGCRRTRE   | 16 | 5  | 21  | 5  | 385  | 43.6  | 7.15 | 1334.2  | 1161.3 | 1309.8  | 1228.2  | 1343.6 | 1204.4 | 1086.6 | 1228.5  |
| S6BAQ4    | IgG H chain  | MEFGLSWV   | 16 | 3  | 27  | 1  | 236  | 25.3  | 8.44 |         |        |         |         |        |        |        |         |
| Q59E93    | Membrane     | GSLSRLEPTI | 10 | 8  | 19  | 8  | 977  | 110.5 | 5.53 | 515.6   | 400.2  | 502.8   | 474.2   | 465    | 389    | 363.5  | 406     |
| A0A193CH  | 10E8 heavy   | EVQLVESG   | 28 | 3  | 26  | 1  | 131  | 14.4  | 7.96 | 158.8   | 163.2  | 155.1   | 171.8   | 181.3  | 163    | 182.6  | 157.8   |
| Q15166    | Serum para   | MGKLVALV   | 16 | 6  | 172 | 4  | 354  | 39.6  | 5.41 | 388.4   | 362.1  | 443.9   | 424     | 404.1  | 387.6  | 306.9  | 355.2   |
| B2RA39    | cDNA, FLJ9   | MLLLFSVIL  | 12 | 6  | 20  | 5  | 569  | 64.3  | 7.06 | 981     | 877    | 968.8   | 973.7   | 916.8  | 847.9  | 950.7  | 781.4   |
| PODJI9    | Serum amy    | MKLLTGLV   | 25 | 4  | 16  | 2  | 122  | 13.5  | 9.14 | 332.3   | 257.1  | 325.2   | 329     | 287.9  | 283.8  | 467.6  | 294.1   |
| PODJI8    | Serum amy    | MKLLTGLV   | 41 | 4  | 22  | 2  | 122  | 13.5  | 6.79 | 384.7   | 312.6  | 424.2   | 400.2   | 334.5  | 316.6  | 683.4  | 389.3   |
| A0A068LKI | Ig heavy ch  | QVQLVESG   | 33 | 3  | 12  | 1  | 125  | 13.9  | 9.01 |         |        |         |         |        |        |        |         |
| Q15582    | Transformi   | MALFVRLI   | 11 | 7  | 25  | 7  | 683  | 74.6  | 7.71 | 1217.3  | 1181.9 | 1282.9  | 1272.7  | 1157.6 | 1193.1 | 1078.2 | 1222.9  |
| A0A024R8  | Prostaglan   | MATHHTLV   | 21 | 3  | 33  | 3  | 190  | 21    | 7.8  | 868.5   | 780.4  | 887.8   | 877.6   | 863.8  | 666    | 610.6  | 727.8   |
| O00187    | Mannan-bi    | MRLTLGLI   | 10 | 6  | 35  | 6  | 686  | 75.7  | 5.63 | 2314.3  | 2064   | 2289    | 2051    | 2010.4 | 1745.3 | 1793.4 | 1989    |
| Q65ZC9    | Single-chai  | QVQLVQSG   | 17 | 3  | 25  | 1  | 240  | 25.6  | 9.11 |         |        |         |         |        |        |        |         |
| P18065    | Insulin-like | MLPRVGCF   | 22 | 5  | 11  | 5  | 325  | 34.8  | 7.5  | 411.4   | 349.1  | 408.5   | 403.6   | 332.6  | 324.6  | 270.7  | 301.5   |
| A0A140TA  | Tenascin-X   | MMPAQYAF   | 3  | 10 | 14  | 10 | 4242 | 458   | 5.17 | 402.7   | 380.1  | 427.2   | 385.6   | 348.8  | 371.3  | 319.7  | 362.7   |
| P18428    | Lipopolysa   | MGALARAI   | 9  | 4  | 26  | 4  | 481  | 53.4  | 6.7  | 1117.8  | 1038.8 | 1148.7  | 1059.3  | 991.4  | 1082.1 | 1446.9 | 996.7   |
| A0A1B1CY  | Vitamin D I  | LAERLKAKL  | 38 | 2  | 104 | 2  | 34   | 3.7   | 8.56 | 10328.3 | 9334.3 | 10642.8 | 10623.2 | 7147.6 | 8648.4 | 3808.9 | 10424.2 |
| A2NYQ9    | Anti-folate  | QVQLVESG   | 32 | 3  | 16  | 1  | 120  | 13.3  | 8.44 | 45.6    | 42     | 53.7    | 41.3    | 43.9   | 53.3   | 44.4   | 53.9    |
| Q9Y5Y7    | Lymphatic    | MARCFSLV   | 11 | 4  | 24  | 4  | 322  | 35.2  | 8.28 | 1481    | 1276.5 | 1382.1  | 1324.6  | 1456   | 1268.8 | 964.9  | 1364.9  |
| P02671    | Fibrinogen   | MFSMRIVC   | 5  | 4  | 11  | 4  | 866  | 94.9  | 6.01 | 989.7   | 850.9  | 726.5   | 790.5   | 773.6  | 947.4  | 939.9  | 771.5   |
| P02533    | Keratin, ty  | MTTCSRQF   | 16 | 8  | 40  | 2  | 472  | 51.5  | 5.16 | 86.1    | 62.7   | 80      | 78.1    | 73.8   | 79     | 51     | 55.3    |
| Q6EMK4    | Vasorin OS   | MCSRVPLL   | 6  | 3  | 13  | 3  | 673  | 71.7  | 7.39 | 507     | 411    | 474.9   | 446.2   | 485.5  | 398    | 338    | 363.3   |
| A0A0S2Z4  | HCG20398     | MASTSTTIF  | 9  | 6  | 20  | 3  | 564  | 60    | 8    | 557.3   | 425.9  | 473.6   | 446.2   | 492.1  | 391.6  | 358.9  | 406.5   |
| B7Z4R8    | cDNA FLJ5    | MAWKTLPI   | 11 | 9  | 23  | 1  | 853  | 89.5  | 8.91 |         |        |         |         |        |        |        |         |
| B3KUE5    | Phospholip   | MGLSGSDN   | 9  | 4  | 16  | 4  | 513  | 56.6  | 6.64 | 1026.7  | 1001.6 | 1132.5  | 1000.6  | 1019.8 | 992.1  | 662.1  | 901.5   |
| A2NB46    | Cold agglut  | EIVLTQSPG  | 25 | 2  | 19  | 1  | 109  | 11.9  | 9.01 | 438.5   | 393.2  | 457.3   | 431.9   | 398.7  | 419.1  | 400.9  | 397.6   |
| B2R773    | cDNA, FLJ9   | MLLLGAVL   | 12 | 2  | 6   | 2  | 244  | 26.4  | 5.74 | 835.1   | 1129.4 | 751.6   | 746     | 632.2  | 663.9  | 539.3  | 546.2   |
| A8K6K4    | cDNA FLJ7    | MTLLWCVA   | 7  | 4  | 18  | 4  | 570  | 65.4  | 8.22 | 1248.6  | 1077.3 | 1346    | 1536.6  | 1482.1 | 1344.5 | 1075.5 | 1308    |
| A0A087W)  | Cadherin-1   | MGPWSRS    | 3  | 2  | 6   | 2  | 903  | 100   | 4.79 | 177.2   | 154.2  | 206.2   | 194.4   | 167    | 155.5  | 132.6  | 167.8   |
| A8K6A6    | cDNA FLJ7    | MGLPRLVC   | 11 | 6  | 13  | 6  | 646  | 71.6  | 5.67 | 759.3   | 704    | 749.6   | 701.3   | 759.5  | 878.3  | 610.8  | 640.8   |
| B3KQF4    | cDNA FLJ9    | MAPFEPLA   | 19 | 3  | 13  | 3  | 207  | 23.2  | 8.1  | 222.9   | 170.1  | 180     | 186.7   | 152.8  | 165.9  | 169.3  | 166.7   |
| A8K430    | Fructose-b   | MAHRFPAL   | 21 | 5  | 9   | 5  | 364  | 39.4  | 8.21 | 159.5   | 123.1  | 169.1   | 169.2   | 125.7  | 152.2  | 103.7  | 111.1   |
| A0A0K0K1  | Cystatin OS  | MAGPLRAF   | 31 | 3  | 19  | 3  | 146  | 15.8  | 8.75 | 842.1   | 825.4  | 805.6   | 821     | 888.1  | 813    | 778.2  | 801.8   |
| A8K335    | cDNA FLJ7    | MASPGRLL   | 15 | 4  | 20  | 4  | 318  | 36    | 7.42 | 727.5   | 654.2  | 707.8   | 763.3   | 715.1  | 602    | 560    | 626.5   |
| Q9NQ79    | Cartilage a  | MAPSADPC   | 7  | 5  | 13  | 5  | 661  | 71.4  | 5.12 | 908.4   | 874.4  | 1227.9  | 829.9   | 874.3  | 746.8  | 679.4  | 792.2   |
| Q15485    | Ficolin-2 O  | MELDRAVC   | 15 | 6  | 19  | 6  | 313  | 34    | 6.77 | 1636.6  | 1319.3 | 1375.2  | 1231.1  | 1469.1 | 1458.5 | 1153.2 | 1232.5  |
| B4E0X1    | Beta-2-mic   | MRSVALA    | 19 | 3  | 14  | 3  | 122  | 13.9  | 7.44 | 1324.5  | 1277   | 1268.4  | 1283.3  | 1219.7 | 1453.9 | 1226.4 | 1181.8  |
| P05362    | Intercellul  | MAPSSPRP   | 9  | 4  | 8   | 4  | 532  | 57.8  | 7.99 | 238.6   | 210.4  | 221.3   | 230.1   | 208.3  | 214.7  | 218.3  | 202.9   |
| Q76LX8    | A disintegr  | MHQRHPR    | 4  | 5  | 9   | 5  | 1427 | 153.5 | 7.17 | 543.8   | 327.7  | 425.6   | 395.9   | 310.8  | 349.8  | 260.2  | 311.2   |
| A0A075B7  | Protein IG   | MEFELSWV   | 19 | 2  | 21  | 0  | 117  | 12.9  | 6.51 |         |        |         |         |        |        |        |         |

|           |              |           |    |   |    |   |      |       |      |        |        |        |        |        |        |        |        |
|-----------|--------------|-----------|----|---|----|---|------|-------|------|--------|--------|--------|--------|--------|--------|--------|--------|
| P21333    | Filamin-A C  | MSSSHSRA  | 2  | 4 | 8  | 4 | 2647 | 280.6 | 6.06 | 169.3  | 148    | 168.1  | 169.7  | 144.1  | 141.4  | 110.8  | 123.6  |
| Q92496    | Compleme     | MLLLINVIL | 13 | 5 | 24 | 5 | 578  | 65.3  | 4.94 | 1447.6 | 1316   | 1489.3 | 1467.8 | 1465.4 | 1237.4 | 1561.3 | 1422.9 |
| A0A024RD  | Phospholip   | MVPPKLHV  | 8  | 3 | 8  | 3 | 441  | 50    | 7.56 | 565    | 425.7  | 544.9  | 555.5  | 541    | 451.2  | 424.7  | 431.5  |
| Q86VB7    | Scavenger    | MSKLRMVI  | 5  | 4 | 7  | 4 | 1156 | 125.4 | 5.95 | 208.9  | 181    | 222.9  | 208.4  | 189.1  | 157.1  | 166.1  | 167.3  |
| P07737    | Profilin-1 C | MAGWNA    | 27 | 3 | 12 | 3 | 140  | 15    | 8.27 | 387.8  | 353.3  | 350.2  | 331.5  | 356.3  | 337.3  | 253.1  | 247.6  |
| P37802    | Transgelin-  | MANRGPA   | 30 | 5 | 14 | 5 | 199  | 22.4  | 8.25 | 690.4  | 625.6  | 751.4  | 676.2  | 673.6  | 605.5  | 526.5  | 445.5  |
| Q13103    | Secreted p   | MISRMEKN  | 27 | 5 | 11 | 5 | 211  | 24.3  | 8.32 | 285.6  | 310.5  | 260.6  | 242.5  | 241.1  | 256.7  | 215.2  | 286.8  |
| B1AHL2    | Fibulin-1 O  | MERAAPSF  | 7  | 4 | 8  | 4 | 721  | 78.3  | 5.39 | 239.3  | 197.7  | 215.8  | 222.6  | 261.5  | 166    | 171.8  | 181.8  |
| Q59EA3    | Cadherin 5   | TDRQSNGT  | 7  | 5 | 13 | 5 | 807  | 89.9  | 5.48 | 558.2  | 497.9  | 596.1  | 503.1  | 496.3  | 329.5  | 293.5  | 314    |
| Q0IIN1    | Keratin 77   | MSHQFSSC  | 5  | 3 | 24 | 1 | 578  | 61.8  | 5.85 |        |        |        |        |        |        |        |        |
| Q16853    | Membrane     | MNQKTILV  | 9  | 5 | 9  | 5 | 763  | 84.6  | 6.52 | 129.3  | 94.8   | 137.7  | 148    | 126.3  | 94.6   | 76.7   | 99.9   |
| P02745    | Compleme     | MEGPRGW   | 9  | 2 | 37 | 2 | 245  | 26    | 9.11 | 2073.6 | 2290.7 | 2089.9 | 2080.8 | 2050.6 | 2014.3 | 2287.5 | 2193.5 |
| A0N5G5    | Rheumatoi    | EIVLTQSPA | 23 | 2 | 9  | 2 | 118  | 12.8  | 8.97 | 136.1  | 97.1   | 132.6  | 124.5  | 110.3  | 101.2  | 108.4  | 94.5   |
| Q9HCC1    | Single chai  | EVQLVESG  | 37 | 3 | 8  | 1 | 112  | 12.2  | 8.47 | 31.1   | 15.9   | 22.6   | 19.8   | 18.6   | 20.8   | 18.8   | 19     |
| Q9Y490    | Talin-1 OS-  | MVALSLKIS | 2  | 5 | 6  | 5 | 2541 | 269.6 | 6.07 |        |        |        |        |        |        |        |        |
| P33908    | Mannosyl-    | MPVGGLLP  | 7  | 4 | 11 | 4 | 653  | 72.9  | 6.47 | 388.2  | 349.4  | 419.1  | 421.2  | 385.4  | 302.6  | 327    | 296.9  |
| A8K6C9    | cDNA FLJ78   | MGIPMGKS  | 14 | 2 | 22 | 2 | 180  | 20.2  | 9.32 | 1228.8 | 985.8  | 1209.8 | 986.1  | 1181.6 | 934.7  | 818.7  | 934.1  |
| A0A087W1  | Neural cell  | MLQTKDLI  | 6  | 5 | 14 | 5 | 848  | 93.3  | 4.87 | 1126.6 | 994.6  | 1094.7 | 1013.7 | 997.6  | 1054.1 | 759.1  | 888.9  |
| V9H1C1    | Gelsolin ex  | PNSMVVEH  | 35 | 3 | 48 | 1 | 69   | 8     | 5.78 |        |        |        |        |        |        |        |        |
| Q9HDC9    | Adipocyte    | MSEADGLF  | 10 | 4 | 16 | 4 | 416  | 46.5  | 6.16 | 696.8  | 716.8  | 782.3  | 793.5  | 763.3  | 642.7  | 620.9  | 668.2  |
| A0A068LL6 | Ig heavy ch  | QVQLVQSG  | 19 | 2 | 16 | 1 | 120  | 13.3  | 7.93 | 55.8   | 60.9   | 56.5   | 48     | 77.1   | 57.8   | 80.2   | 59.3   |
| O00533    | Neural cell  | MEPLLLGR  | 4  | 5 | 13 | 5 | 1208 | 135   | 5.76 | 401.8  | 325.1  | 460.4  | 348.5  | 365.9  | 330.3  | 276.8  | 308.4  |
| P35443    | Thrombosy    | MLAPRGAA  | 3  | 2 | 6  | 1 | 961  | 105.8 | 4.68 | 47.3   | 37.8   | 54.5   | 40.4   | 45.5   | 37.1   | 36.5   | 35.7   |
| P23470    | Receptor-t   | MRRILLEPC | 4  | 4 | 5  | 4 | 1445 | 161.9 | 6.42 | 180.8  | 144    | 201.5  | 200.5  | 186.1  | 134.1  | 104.6  | 147.9  |
| E9PR17    | CD59 glyco   | MGIQGGSV  | 15 | 2 | 5  | 2 | 130  | 14.5  | 7.77 | 191.7  | 175.9  | 212    | 214.1  | 197.9  | 177    | 156.6  | 192.7  |
| B2R9V7    | Superoxide   | MLALLCSCI | 12 | 2 | 5  | 2 | 240  | 25.9  | 6.79 | 123.8  | 106.3  | 144.8  | 116.1  | 109.3  | 109.1  | 73.1   | 103    |
| A0A125QY  | GCT-A9 lig   | DIQMTQSP  | 32 | 2 | 5  | 2 | 107  | 11.6  | 4.65 | 97.4   | 98.7   | 124.6  | 111.1  | 94.1   | 115.4  | 270.5  | 100.7  |
| V9HW31    | ATP syntha   | MLGFVGRV  | 4  | 2 | 4  | 2 | 529  | 56.5  | 5.4  | 149.2  | 140.3  | 154.3  | 152    | 138.6  | 89.4   | 122.9  | 83.6   |
| M9MML0    | Fc of IgG lo | MGGGAGE   | 11 | 4 | 7  | 4 | 290  | 32.7  | 8.1  | 649.1  | 555.7  | 596.8  | 601.8  | 549.8  | 534.9  | 510.7  | 525.7  |
| Q13201    | Multimeric   | MKGARLFV  | 3  | 3 | 12 | 3 | 1228 | 138   | 7.93 | 578.8  | 527.2  | 603.9  | 553.1  | 542.8  | 563.8  | 501.9  | 484.6  |
| P05164    | Myeloper     | MGVPPFSS  | 7  | 5 | 7  | 5 | 745  | 83.8  | 8.97 | 216.2  | 219.4  | 213.8  | 211.2  | 238.4  | 216    | 165.9  | 150.6  |
| B2R7D2    | cDNA, FLJ9   | MLRAPGCL  | 7  | 3 | 6  | 3 | 487  | 55.1  | 7.97 | 201.9  | 179.8  | 203.8  | 180.4  | 175.6  | 167.6  | 145.5  | 180    |
| G9K388    | YWHAE/FA     | RADPAGAA  | 5  | 2 | 5  | 2 | 384  | 41.2  | 4.97 | 382.4  | 307.1  | 367.6  | 384.3  | 322.6  | 149.6  | 340.3  | 139.1  |
| A0A125QY  | IBM-B2 he    | EVQLVESG  | 13 | 1 | 8  | 1 | 123  | 13.6  | 7.12 | 351.7  | 286.3  | 377.4  | 331.4  | 326.2  | 328.2  | 296.8  | 338.5  |
| A0A125QY  | GCT-A7 he    | QVQLVQSG  | 21 | 2 | 16 | 1 | 119  | 13.1  | 7.94 |        |        |        |        |        |        |        |        |
| Q8NBP7    | Proprotein   | MGTVSSRF  | 5  | 3 | 4  | 3 | 692  | 74.2  | 6.61 | 190.5  | 139.5  | 186.7  | 178    | 184.5  | 130.9  | 92.9   | 138.5  |
| A4D2D2    | Procollage   | MLPAATAS  | 12 | 4 | 7  | 4 | 449  | 47.9  | 7.43 | 157.4  | 139.2  | 137.5  | 118.9  | 136    | 122.5  | 96.7   | 134.5  |
| P07195    | L-lactate de | MATLKEKL  | 15 | 4 | 10 | 4 | 334  | 36.6  | 6.05 | 219    | 207.3  | 205.5  | 176    | 197.2  | 192.4  | 191.6  | 187.3  |
| E7EQ64    | Trypsin-1 C  | MNPLLILTF | 11 | 2 | 20 | 2 | 261  | 28.1  | 7.25 | 485.9  | 434    | 340.8  | 333.8  | 442.1  | 322.1  | 229.1  | 329.5  |
| Q9UL85    | Myosin-rea   | EIVMTQSP  | 25 | 2 | 14 | 2 | 109  | 11.8  | 8.51 | 1238.1 | 1267.8 | 1233.3 | 1110.3 | 1252.6 | 1142.2 | 1319.2 | 1213.3 |
| P19320    | Vascular ce  | MPGKMVV   | 5  | 3 | 4  | 3 | 739  | 81.2  | 5.22 | 165.9  | 124.6  | 135.8  | 129.9  | 127.7  | 132.7  | 109.2  | 119.6  |
| A0A140VJF | Testicular t | MAAATGP   | 7  | 3 | 3  | 3 | 493  | 54.5  | 6    | 133.4  | 108.5  | 133.7  | 124.3  | 118.2  | 114.2  | 84.4   | 106.7  |

|          |                       |           |    |   |    |   |      |       |       |        |        |        |        |        |       |        |        |
|----------|-----------------------|-----------|----|---|----|---|------|-------|-------|--------|--------|--------|--------|--------|-------|--------|--------|
| P05019   | Insulin-like          | MGKISSLPT | 7  | 1 | 4  | 1 | 195  | 21.8  | 9.72  |        |        |        |        |        |       |        |        |
| Q15430   | Coagulation           | PPESTVMA  | 9  | 2 | 13 | 1 | 236  | 26.1  | 5.48  |        |        |        |        |        |       |        |        |
| A2J1N5   | Rheumatoid            | VESGGGVV  | 23 | 2 | 5  | 1 | 94   | 10.4  | 9.13  | 128.6  | 126.1  | 218.9  | 147    | 127.4  | 123.3 | 107.3  | 112.9  |
| Q07954   | Prolonged             | MLTPPLLLL | 1  | 2 | 4  | 2 | 4544 | 504.3 | 5.39  | 23.3   | 22.5   | 29.5   | 30     | 27.7   | 25.7  | 31.1   | 22.3   |
| P24592   | Insulin-like          | MTPHRLLP  | 10 | 2 | 5  | 2 | 240  | 25.3  | 7.81  | 139.1  | 119    | 147.8  | 160    | 139.5  | 141   | 102.9  | 120.4  |
| B2RBF5   | cDNA, FLJ9            | MSRPQLRF  | 9  | 3 | 3  | 3 | 385  | 43.8  | 6.64  | 110    | 98.6   | 119.6  | 98.5   | 117    | 103.3 | 121.3  | 95.9   |
| P12111   | Collagen alpha        | MRKHRHLF  | 1  | 3 | 6  | 3 | 3177 | 343.5 | 6.68  | 112.8  | 84.9   | 109    | 100.6  | 97.6   | 87.7  | 70.1   | 83.9   |
| B7Z9B1   | cDNA FLJ52            | MKTPPGAS  | 2  | 1 | 4  | 1 | 760  | 83.4  | 5.12  | 213    | 182    | 223.4  | 245.4  | 200.6  | 175   | 158.9  | 183.5  |
| B2R4R0   | Histone H4            | MSGRGKG   | 17 | 2 | 10 | 2 | 103  | 11.4  | 11.36 | 875.9  | 676.1  | 749.1  | 753.8  | 704.1  | 320.6 | 564.9  | 266.4  |
| A8K6C1   | cDNA FLJ76            | MLAATVLT  | 5  | 2 | 5  | 2 | 493  | 54.7  | 6.09  | 730.8  | 691    | 887    | 885.6  | 756.5  | 766.5 | 666.3  | 679.2  |
| A0N5G1   | Rheumatoid            | DIQMTQSP  | 25 | 2 | 4  | 2 | 116  | 12.5  | 8.46  | 293.3  | 244.9  | 279.1  | 241.5  | 264.9  | 263.1 | 246.1  | 236.4  |
| X6RBG4   | Uromodulin            | MRHIMTRI  | 4  | 2 | 3  | 2 | 689  | 75.6  | 5.87  | 213.9  | 141    | 221.9  | 221.6  | 205.7  | 147.3 | 149.8  | 174.1  |
| P49746   | Thrombospondin        | METQELRC  | 3  | 3 | 17 | 2 | 956  | 104.1 | 4.65  | 765.2  | 612.7  | 777.6  | 651.6  | 854.1  | 638.2 | 558.4  | 626.2  |
| A0A0X9UV | MS-D4 heparan         | EVQLVQSG  | 10 | 1 | 15 | 1 | 122  | 13.5  | 7.12  | 710.5  | 592.1  | 723.2  | 664    | 740.1  | 668.3 | 688.6  | 644.4  |
| P00918   | Carbonic anhydrase    | MSHHWGY   | 12 | 3 | 5  | 3 | 260  | 29.2  | 7.4   | 163.1  | 160    | 141.6  | 152    | 162.7  | 170   | 149.8  | 122.8  |
| P08253   | 72 kDa type I         | MEALMAR   | 2  | 1 | 2  | 1 | 660  | 73.8  | 5.47  |        |        |        |        |        |       |        |        |
| J3KPA1   | Cysteine-rich         | MKQILHPA  | 9  | 3 | 13 | 3 | 276  | 31    | 7.61  | 2029.3 | 1726.2 | 1542.2 | 1556.9 | 1752.8 | 1671  | 1279.2 | 1673.4 |
| P22692   | Insulin-like          | MLPLCLVA  | 11 | 2 | 3  | 2 | 258  | 27.9  | 7.15  |        |        |        |        |        |       |        |        |
| Q4ZG40   | Macrophage            | MRNKKILKI | 3  | 1 | 2  | 1 | 520  | 52.6  | 8.78  | 200.9  | 143.7  | 187.4  | 181.2  | 159.4  | 157.2 | 131.7  | 171.9  |
| E2RVJ0   | Anion exchange        | MEELQDDY  | 3  | 2 | 4  | 2 | 912  | 101.9 | 5.22  | 45.7   | 41.6   | 51.8   | 36.3   | 32.8   | 41.9  | 22.8   | 23.2   |
| A6NC48   | ADP-ribosylating      | MAAQGCA   | 7  | 2 | 5  | 2 | 333  | 37.5  | 7.97  | 275.1  | 235.9  | 310.2  | 251.1  | 259.8  | 236.7 | 225.3  | 236.2  |
| Q6MZL2   | Putative urate        | NPGIYTCSA | 6  | 2 | 10 | 2 | 321  | 35.1  | 5.97  | 701.4  | 643.4  | 639.9  | 593    | 599.9  | 603.8 | 543.8  | 569.9  |
| P04040   | Catalase O            | MADSRDP   | 7  | 3 | 5  | 3 | 527  | 59.7  | 7.39  | 325.4  | 234.3  | 271    | 208.5  | 178    | 199.2 | 194.1  | 182.4  |
| D3YTG3   | Target of Nucleosome  | MRGGKCN   | 1  | 2 | 4  | 2 | 1777 | 195.2 | 9.73  | 157.3  | 163.3  | 221.3  | 176.3  | 176    | 133.7 | 123.8  | 153.2  |
| Q9UL89   | Myosin-related        | VQSGAEVK  | 10 | 1 | 2  | 1 | 116  | 12.6  | 9.1   | 83.3   | 66     | 98.2   | 70.9   | 86     | 68.2  | 64.1   | 74.9   |
| X6R8F3   | Neutrophil            | MPLGLLWL  | 14 | 2 | 6  | 2 | 200  | 22.8  | 8.5   | 369.7  | 353.7  | 377.1  | 359.3  | 354    | 316.2 | 289.9  | 264.9  |
| A0A024RD | SPARC-like            | MKTGLFFL  | 2  | 1 | 3  | 1 | 664  | 75.2  | 4.81  | 108.7  | 78     | 88.3   | 113.9  | 86.9   | 81.4  | 62.4   | 67.4   |
| P35916   | Vascular endothelial  | MQRGAAL   | 2  | 1 | 1  | 1 | 1363 | 152.7 | 6.3   | 45.6   | 35.5   | 48.1   | 50.6   | 34.5   | 40.7  | 31.2   | 44.5   |
| B7ZMD7   | Alpha-amylase         | MKLFWLLF  | 3  | 1 | 1  | 1 | 511  | 57.7  | 6.93  | 56.2   | 35.9   | 53.3   | 50.1   | 44     | 49    | 42.1   | 35.3   |
| J3KPS3   | Fructose-bisphosphate | MPYQYPAL  | 8  | 2 | 2  | 2 | 368  | 39.8  | 8.09  | 197.8  | 164.3  | 206.9  | 205.3  | 173.7  | 144.9 | 133.8  | 133.9  |
| Q14126   | Desmoglein            | MARSPGRA  | 2  | 2 | 2  | 2 | 1118 | 122.2 | 5.24  |        |        |        |        |        |       |        |        |
| P23284   | Peptidyl-prolyl       | MLRLSERN  | 6  | 1 | 10 | 1 | 216  | 23.7  | 9.41  |        |        |        |        |        |       |        |        |
| Q8WZ75   | Roundabout            | MGSGGDSI  | 2  | 1 | 3  | 1 | 1007 | 107.4 | 6.64  | 221.9  | 170.2  | 207.2  | 220.8  | 185.4  | 179.8 | 158.2  | 152.6  |
| A0A087X1 | Calcium-dependent     | MLDPSSSEI | 1  | 1 | 49 | 1 | 1301 | 148.2 | 6.05  | 326.4  | 282.7  | 391.4  | 337.5  | 297.2  | 291.3 | 284.7  | 298    |
| A0A0B4J1 | Immunoglobulin        | MEFGLSW   | 15 | 2 | 4  | 1 | 119  | 13.2  | 7.85  |        |        |        |        |        |       |        |        |
| Q86YW5   | Trem-like type        | MGLTLLLLL | 5  | 1 | 2  | 1 | 311  | 32.7  | 6.05  | 143.9  | 116.3  | 143.2  | 132.4  | 126.9  | 121.4 | 99.9   | 115.4  |
| A0A024R9 | Collectin subunit     | MNGFASLL  | 12 | 3 | 4  | 3 | 277  | 30.7  | 7.33  |        |        |        |        |        |       |        |        |
| Q6UY14   | ADAMTS-like           | MENWTGR   | 2  | 1 | 1  | 1 | 1074 | 116.5 | 8.34  | 62.8   | 54.2   | 65.4   | 56.2   | 53.3   | 47    | 39.6   | 42.9   |
| Q6UX71   | Plexin domain         | MARFPKAL  | 2  | 1 | 4  | 1 | 529  | 59.5  | 6.46  | 226.6  | 197.4  | 227.5  | 181.4  | 199.7  | 211.7 | 150.5  | 179.8  |
| P03950   | Angiogenic factor     | MVMGLGV   | 18 | 2 | 3  | 2 | 147  | 16.5  | 9.64  | 420    | 390.8  | 489.1  | 518.6  | 472.9  | 389.7 | 343.2  | 363.2  |
| Q05639   | Elongation factor     | MGKEKTHI  | 2  | 1 | 2  | 1 | 463  | 50.4  | 9.03  | 127.6  | 111.4  | 84.2   | 85.3   | 136.9  | 56.2  | 104.1  | 40.3   |
| Q59ED3   | Intercellular         | LIVTCSLQQ | 4  | 1 | 2  | 1 | 344  | 38.4  | 7.78  | 87.6   | 66     | 99.7   | 102.8  | 70     | 66    | 56.5   | 68.1   |



|           |              |           |    |   |    |   |      |       |       |        |        |        |        |        |        |        |        |
|-----------|--------------|-----------|----|---|----|---|------|-------|-------|--------|--------|--------|--------|--------|--------|--------|--------|
| Q8NGE6    | Olfactory r  | MGDKGTG   | 6  | 1 | 16 | 1 | 254  | 28.1  | 7.91  | 1274.4 | 1087.1 | 1695.4 | 1970.5 | 1579.6 | 898.4  | 1144.2 | 1201.7 |
| P07333    | Macrophag    | MGPGVLLL  | 3  | 2 | 3  | 2 | 972  | 107.9 | 6.37  | 52.1   | 37.1   | 42.2   | 44.6   | 33.9   | 37.4   | 31.8   | 32.6   |
| Q9H8L6    | Multimerin   | MILSLLFSL | 2  | 2 | 3  | 2 | 949  | 104.3 | 5.86  | 227.9  | 155.2  | 220    | 188.5  | 186.5  | 178.5  | 142.2  | 160.8  |
| P04066    | Tissue alph  | MRAPGMR   | 5  | 2 | 4  | 2 | 466  | 53.7  | 6.84  | 152.2  | 118.8  | 179.1  | 166.6  | 134.4  | 125    | 104    | 124.2  |
| A8K7T4    | cDNA FLJ75   | MAAEGWI   | 4  | 1 | 1  | 1 | 356  | 40.2  | 6.95  |        |        |        |        |        |        |        |        |
| A0A140VJC | Testicular t | MLPGLALL  | 4  | 3 | 4  | 3 | 770  | 86.9  | 4.82  | 139.9  | 137    | 167.7  | 161.9  | 160.1  | 141.1  | 137.8  | 134.5  |
| A0A1C9J6F | B cell recep | EVQLVQSG  | 14 | 1 | 2  | 1 | 132  | 14.6  | 8.02  | 87.8   | 61.3   | 96.2   | 87.2   | 86.2   | 79     | 58.1   | 61.6   |
| B4DZM1    | cDNA FLJ58   | MTKLPDDP  | 2  | 1 | 16 | 1 | 872  | 100.5 | 5.02  | 1136   | 998.7  | 907.2  | 924.7  | 1086.3 | 1158.3 | 1028.7 | 1025.2 |
| A0A024R6  | Dipeptidas   | MQPSGLEC  | 3  | 1 | 1  | 1 | 486  | 53.3  | 6.54  |        |        |        |        |        |        |        |        |
| Q4LE64    | NUMA1 va     | LSGITKMTL | 1  | 1 | 45 | 1 | 2121 | 238.7 | 5.81  | 1029.2 | 821    | 1000.5 | 1075   | 1117.1 | 684    | 571.4  | 802.5  |
| P11279    | Lysosome-    | MAAPGSAI  | 4  | 2 | 3  | 2 | 417  | 44.9  | 8.75  | 315.2  | 278.2  | 311.7  | 266.4  | 250.5  | 229.6  | 221.9  | 238.8  |
| Q99784    | Noelin OS-   | MSVPLLKIG | 4  | 2 | 3  | 2 | 485  | 55.3  | 6.95  | 230.4  | 224.4  | 214.6  | 214.5  | 211.6  | 203.3  | 219.5  | 236.4  |
| Q9UIU0    | Dihydropyr   | MAAGCLLA  | 2  | 2 | 4  | 2 | 1110 | 125.2 | 5.36  | 86.9   | 72.3   | 95.2   | 65.3   | 68.7   | 75.9   | 56.5   | 64.3   |
| P07998    | Ribonuclea   | MALEKSLV  | 15 | 1 | 2  | 1 | 156  | 17.6  | 8.79  | 36.7   | 32     | 38.4   | 41.7   | 42.1   | 36.3   | 29.5   | 34.2   |
| K4DIA0    | ICOS liganc  | MRLGSPGL  | 2  | 1 | 7  | 1 | 473  | 51.9  | 8.05  | 570.7  | 574.2  | 552.6  | 517.5  | 534.7  | 498.4  | 476.9  | 522.3  |
| Q9ULV0    | Unconvent    | MSVGELYS  | 0  | 2 | 8  | 2 | 1848 | 213.5 | 7.2   | 63.5   | 46.6   | 53.9   | 82.8   | 56     | 64.5   | 84.6   | 53.7   |
| O14786    | Neuropilin-  | MERGLPLL  | 1  | 1 | 1  | 1 | 923  | 103.1 | 5.88  |        |        |        |        |        |        |        |        |
| B7Z3G0    | cDNA FLJ58   | MSARRTSH  | 2  | 1 | 16 | 1 | 833  | 94.1  | 6.87  | 219.8  | 169.4  | 259.1  | 320.3  | 272.7  | 313.1  | 191.9  | 295.9  |
| Q99969    | Retinoic ac  | MRRLLIPLA | 7  | 1 | 2  | 1 | 163  | 18.6  | 9.09  | 55.7   | 50.7   | 68.1   | 56.8   | 50.2   | 45.7   | 42.4   | 40.7   |
| Q9HCI6    | E3 SUMO-p    | MGDPGSEI  | 1  | 1 | 6  | 1 | 787  | 89.6  | 7.74  | 303.5  | 614.6  | 350.2  | 420.3  | 379.6  | 224.3  | 259.3  | 247.6  |
| A0A087WV  | Receptor-t   | MKPAAREA  | 2  | 2 | 2  | 2 | 1342 | 146.5 | 5.62  | 75     | 66.9   | 70.1   | 55     | 58.1   | 70     | 55     | 58     |
| P67936    | Tropomyos    | MAGLNSLE  | 8  | 2 | 4  | 2 | 248  | 28.5  | 4.69  | 474    | 453.2  | 532.2  | 517.2  | 458.3  | 433.9  | 343.7  | 328.1  |
| A0A024RC  | Peroxisom    | MEQPQEEA  | 2  | 1 | 5  | 1 | 441  | 49.9  | 7.59  | 477.6  | 483.8  | 540.7  | 509.1  | 603.2  | 356.8  | 456.9  | 446.8  |
| P98160    | Basement     | MGWRAAC   | 1  | 2 | 3  | 2 | 4391 | 468.5 | 6.51  | 180.2  | 126.8  | 126.6  | 132.4  | 138.4  | 159.1  | 95.7   | 91.9   |
| A0A0S4XQ  | MHC Class    | MAVMAPR   | 4  | 1 | 1  | 1 | 365  | 40.8  | 6     |        |        |        |        |        |        |        |        |
| Q8IY21    | Probable A   | MERNVLTT  | 1  | 1 | 12 | 1 | 1712 | 197.7 | 7.59  | 976.1  | 858.9  | 1005.7 | 930.4  | 1047.1 | 730.4  | 754.9  | 795    |
| A0A0U1RR  | Histone H2   | MSGRGKQ   | 9  | 2 | 2  | 2 | 170  | 18.5  | 11.52 | 257.8  | 229.1  | 272.6  | 266.6  | 263.5  | 232.6  | 186    | 218.4  |
| G3XAI2    | Laminin su   | MDCPLSAP  | 1  | 1 | 1  | 1 | 1810 | 200.3 | 4.96  | 118.5  | 108.6  | 150.7  | 133.7  | 113.4  | 107.6  | 80.6   | 99.6   |
| C9JC84    | Fibrinogen   | MSWSLHPI  | 3  | 1 | 2  | 1 | 461  | 52.3  | 5.63  |        |        |        |        |        |        |        |        |
| Q9H7P6    | Multivesic   | MRSCFCVR  | 3  | 1 | 13 | 1 | 319  | 35.6  | 8.15  |        |        |        |        |        |        |        |        |
| B7Z351    | Secreted p   | MGIVPRSL  | 5  | 1 | 1  | 1 | 327  | 37.2  | 4.73  | 47.7   | 36.1   | 40.2   | 46.4   | 41.8   | 46.3   | 34.7   | 40.3   |
| Q9BWP8    | Collectin-1  | MRGNLALV  | 6  | 2 | 2  | 2 | 271  | 28.6  | 5.41  | 36     | 28.1   | 40.2   | 40.5   | 40.3   | 21.1   | 16.9   | 18.3   |
| A0A024QZ  | Serine/thre  | MELLRTITY | 2  | 1 | 3  | 1 | 685  | 78.2  | 8.24  | 297.4  | 286.2  | 380.1  | 538.4  | 430    | 246.8  | 223.6  | 359.7  |
| A0A024QZ  | Proteoglyc   | MMQKLLK   | 8  | 1 | 2  | 1 | 158  | 17.6  | 4.86  | 161.4  | 127.2  | 176.4  | 128.5  | 136.2  | 156.7  | 108.9  | 132.4  |
| A8K9X5    | cDNA FLJ76   | MASNMDR   | 2  | 1 | 10 | 1 | 650  | 73.9  | 4.88  | 1183.1 | 1057.9 | 1665   | 1951.7 | 1903.3 | 2038.2 | 880.6  | 1282.7 |
| P11717    | Cation-ind   | MGAAAGR   | 0  | 1 | 1  | 1 | 2491 | 274.2 | 5.94  |        |        |        |        |        |        |        |        |
| A0A024R2  | Dystroglyc   | MRMSVGL   | 2  | 1 | 1  | 1 | 895  | 97.5  | 8.56  |        |        |        |        |        |        |        |        |
| D6W5L6    | Pulmonary    | MHQAGYP   | 3  | 1 | 2  | 1 | 393  | 43.3  | 5.74  | 35.8   | 23.6   | 32.4   | 34.2   | 28.6   | 30.3   | 38.6   | 27.1   |
| P20023    | Compleme     | MGAAGLLC  | 1  | 1 | 1  | 1 | 1033 | 112.8 | 7.52  |        |        |        |        |        |        |        |        |
| A0A060VC  | MHC class    | SHSMRYFF  | 5  | 1 | 9  | 1 | 340  | 38.5  | 6.15  | 990.7  | 1154.2 | 874.8  | 858.5  | 929.5  | 1310.8 | 899.2  | 1005.6 |
| A8K2T7    | Receptor p   | MRPSGTAC  | 1  | 1 | 2  | 1 | 1210 | 134.1 | 6.7   |        |        |        |        |        |        |        |        |
| A0A024R1  | Contactin 1  | MKMWLLV   | 1  | 1 | 2  | 1 | 1018 | 113.2 | 5.9   | 50     | 47.3   | 56.2   | 40.4   | 46.9   | 43.8   | 29.5   | 41.9   |

|          |              |            |    |   |    |   |      |       |       |       |       |       |       |       |       |       |       |
|----------|--------------|------------|----|---|----|---|------|-------|-------|-------|-------|-------|-------|-------|-------|-------|-------|
| Q9BTY2   | Plasma alp   | MRPQELPR   | 2  | 1 | 6  | 1 | 467  | 54    | 6.25  | 282.1 | 242.6 | 252.4 | 280.7 | 273.7 | 242.1 | 220.1 | 237.3 |
| Q8IXL6   | Extracellula | MKMMMLVF   | 3  | 1 | 1  | 1 | 584  | 66.2  | 7.74  | 88.7  | 82.9  | 112.4 | 78.9  | 103.9 | 92.9  | 48.6  | 121.2 |
| A0A075B6 | Dynein hea   | MEKDAEDC   | 0  | 1 | 6  | 1 | 4707 | 538.3 | 6.13  | 147.4 | 89.2  | 150.5 | 147.8 | 144.5 | 106.1 | 77    | 130.9 |
| A0A087W  | IgGFc-bind   | MGALWSV    | 0  | 1 | 1  | 1 | 4204 | 444.9 | 5.35  | 310.1 | 245.6 | 327.3 | 268   | 250   | 265.7 | 235.5 | 260.4 |
| Q99727   | Metallopro   | MPGSPRPA   | 6  | 1 | 16 | 1 | 224  | 25.5  | 7.8   | 93.4  | 109.7 | 130.5 | 142.1 | 111.3 | 116.6 | 118.5 | 135   |
| Q0ZCH6   | Immunglob    | LVQLVESG   | 7  | 1 | 1  | 1 | 131  | 14.3  | 6.55  | 85.4  | 69.3  | 100   | 97.9  | 77.4  | 76.1  | 67.1  | 71.2  |
| Q9UNN8   | Endothelia   | MLTTLLPIL  | 4  | 1 | 3  | 1 | 238  | 26.7  | 7.18  | 146.2 | 153.2 | 181.9 | 174.8 | 162.8 | 146.9 | 150.4 | 148.8 |
| A0A0C4DG | Poliovirus r | MARAMAA    | 2  | 1 | 2  | 1 | 417  | 45.3  | 6.52  | 336   | 313.3 | 359.9 | 385.4 | 333.7 | 411   | 253.4 | 336.2 |
| J3KNB4   | Cathelicidin | MGTMKTC    | 5  | 1 | 1  | 1 | 173  | 19.6  | 9.41  | 351.3 | 340.1 | 421   | 395.6 | 385.8 | 382.4 | 289.6 | 316.2 |
| Q96RZ2   | N-acetylglu  | MAAGLARI   | 3  | 1 | 1  | 1 | 331  | 36.8  | 6.79  | 70.6  | 65.6  | 59.8  | 47.2  | 49.8  | 40    | 42.2  | 45    |
| Q4LE33   | TNC varian   | SLLCASKSP  | 1  | 1 | 1  | 1 | 2233 | 244.2 | 4.94  |       |       |       |       |       |       |       |       |
| A8K486   | Peptidyl-pr  | MVNPTVFF   | 5  | 1 | 1  | 1 | 165  | 18    | 6.9   | 24.4  | 19    | 13.1  | 15.1  | 13.1  | 13.8  | 8.2   | 9.5   |
| B2R6V9   | cDNA, FLJ9   | MSETSRTA   | 2  | 1 | 1  | 1 | 732  | 83.2  | 6     | 69.4  | 56.9  | 69.2  | 56.4  | 69.9  | 60.9  | 37.2  | 52.7  |
| Q16706   | Alpha-man    | MKLSRQFT   | 1  | 1 | 2  | 1 | 1144 | 131.1 | 7.58  |       |       |       |       |       |       |       |       |
| H3BQD0   | Cerebellin-  | MLGVLELLI  | 11 | 1 | 2  | 1 | 140  | 14.7  | 5.48  | 13.6  | 18.9  | 16.2  | 12    | 15.3  | 18.1  | 12.7  | 13    |
| Q86U17   | Serpin A11   | MGPAWLVI   | 2  | 1 | 1  | 1 | 422  | 47    | 7.68  | 74    | 58.2  | 76.4  | 76.2  | 78.9  | 89.4  | 54    | 54    |
| A0A140VK | Leukotrien   | MPEIVDTC   | 2  | 1 | 1  | 1 | 611  | 69.2  | 6.18  | 35.1  | 29    | 31.9  | 27.7  | 33.2  | 24    | 28.4  | 31.4  |
| A0A140GX | Platelet me  | MGSGPRG    | 5  | 1 | 1  | 1 | 206  | 21.7  | 8.91  | 62.2  | 51.3  | 81.4  | 44.4  | 39.6  | 41.9  | 35.7  | 40.9  |
| Q96S96   | Phosphatic   | MGWTMRI    | 4  | 1 | 2  | 1 | 227  | 25.7  | 6.54  | 34.8  | 29    | 43.1  | 35    | 33.3  | 46.8  | 26.7  | 32.3  |
| O00151   | PDZ and LI   | MTTQQIDL   | 3  | 1 | 1  | 1 | 329  | 36    | 7.02  | 103.2 | 93.2  | 99.7  | 104.3 | 97.3  | 94.3  | 70.4  | 78.2  |
| A0A068B0 | Cis-AB gly   | MAEVLRTL   | 5  | 1 | 1  | 1 | 354  | 40.8  | 8.87  | 92.9  | 74.9  | 93.7  | 95.4  | 75.6  | 124.2 | 72.3  | 74.1  |
| Q6YHK3   | CD109 anti   | MQGPPLLT   | 1  | 1 | 1  | 1 | 1445 | 161.6 | 5.85  | 197.5 | 155.1 | 190.1 | 219.3 | 176.1 | 195.4 | 149.5 | 163.1 |
| B3KSS6   | Phosphodi    | MESPTKEIE  | 1  | 1 | 3  | 1 | 709  | 80.7  | 8.82  | 316.3 | 291.1 | 329.9 | 343.6 | 295.2 | 417.6 | 321.5 | 385.6 |
| B4DQY7   | cDNA FLJ5    | MSWFNAS    | 1  | 1 | 1  | 1 | 992  | 111.7 | 4.87  | 22.3  | 20.1  | 20.8  | 17.9  | 17.2  | 20    | 22.6  | 15.6  |
| A0A024RD | Periostin, c | MIPFLPMF   | 1  | 1 | 1  | 1 | 836  | 93.3  | 7.53  |       |       |       |       |       |       |       |       |
| P06733   | Alpha-enol   | MSILKI HAR | 3  | 1 | 2  | 1 | 434  | 47.1  | 7.39  | 71.8  | 57.6  | 92.1  | 66.6  | 70    | 62.9  | 52.2  | 49.7  |
| Q86SQ4   | Adhesion C   | MMFRSDR    | 1  | 1 | 1  | 1 | 1221 | 136.6 | 7.87  |       |       |       |       |       |       |       |       |
| Q8TER0   | Sushi, nido  | MRHGVAV    | 1  | 1 | 1  | 1 | 1413 | 152.1 | 6.98  |       |       |       |       |       |       |       |       |
| A1L4H1   | Soluble sca  | MRVLACLL   | 1  | 1 | 1  | 1 | 1573 | 165.6 | 6.13  |       |       |       |       |       |       |       |       |
| Q13740   | CD166 anti   | MESKGASS   | 2  | 1 | 1  | 1 | 583  | 65.1  | 6.25  | 60    | 43.9  | 54.1  | 50.8  | 48.3  | 47    | 37.2  | 39.8  |
| O94818   | Nucleolar p  | MESERDM    | 3  | 1 | 1  | 1 | 638  | 71.3  | 5.62  | 66.8  | 54.2  | 83    | 70.8  | 68.8  | 56.3  | 44.9  | 60.9  |
| P06703   | Protein S10  | MACPLDQ    | 9  | 1 | 2  | 1 | 90   | 10.2  | 5.48  |       |       |       |       |       |       |       |       |
| D3DPK5   | SH3 domai    | KQLKPSKAI  | 4  | 1 | 1  | 1 | 257  | 26.8  | 8.38  | 99    | 106.2 | 123.2 | 78.5  | 81.8  | 83.4  | 85    | 63.5  |
| E9PK25   | Cofilin-1 O  | MVSPGHG    | 5  | 1 | 1  | 1 | 204  | 22.7  | 8.34  |       |       |       |       |       |       |       |       |
| A0A125U0 | GCT-A2 he    | EVQLVESG   | 15 | 1 | 1  | 1 | 126  | 13.8  | 5.45  | 24.4  | 19.9  | 30.3  | 26.6  | 20.8  | 26.9  | 15.2  | 18.9  |
| D6W5K2   | Thymosin,    | GVSSRFPEF  | 4  | 1 | 1  | 1 | 169  | 17.9  | 10.48 | 215   | 183.4 | 144.4 | 169.2 | 204.7 | 181.3 | 76.5  | 88    |
| Q6PIY7   | Poly(A) RN   | MFPNSILGI  | 2  | 1 | 1  | 1 | 484  | 56    | 9.38  | 60.9  | 63.3  | 61.6  | 56.5  | 52.3  | 61.6  | 43    | 67.2  |
| Q96AN5   | Transmem     | MTVELWLF   | 3  | 1 | 4  | 1 | 459  | 51.7  | 9.67  | 156.9 | 268.8 | 443.2 | 179.8 | 136.5 | 83.9  | 93.9  | 90    |
| Q6P4F1   | Alpha-(1,3)  | MVRIQRRK   | 5  | 1 | 2  | 1 | 479  | 56.1  | 8.37  |       |       |       |       |       |       |       |       |
| Q9UL82   | Myosin-rea   | SYELTQPSS  | 7  | 1 | 1  | 1 | 107  | 11.4  | 6.6   |       |       |       |       |       |       |       |       |
| Q7Z7M0   | Multiple ep  | MALGKVLA   | 1  | 1 | 1  | 1 | 2845 | 302.9 | 6.87  |       |       |       |       |       |       |       |       |
| Q2KHR2   | DNA-bindin   | MSSSRAQC   | 1  | 1 | 1  | 1 | 1363 | 146.8 | 6.76  |       |       |       |       |       |       |       |       |

|           |              |           |    |   |   |   |      |       |       |       |       |       |       |       |       |       |       |
|-----------|--------------|-----------|----|---|---|---|------|-------|-------|-------|-------|-------|-------|-------|-------|-------|-------|
| Q75KY0    | Putative ur  | LSGSILDVY | 13 | 1 | 1 | 1 | 258  | 29    | 6.7   |       |       |       |       |       |       |       |       |
| V9HVV1    | Epididymis   | MKRMVSM   | 2  | 1 | 1 | 1 | 491  | 55.9  | 8.27  | 85.5  | 127.8 | 209.8 | 85.8  | 64.8  | 51.9  | 68    | 51.6  |
| Q59EB6    | Compleme     | KLLSPLGFS | 2  | 1 | 2 | 1 | 671  | 70.4  | 5.44  | 66.1  | 46.1  | 55.1  | 58.8  | 50.3  | 63.9  | 59.5  | 49.4  |
| Q13131    | 5'-AMP-act   | MRRLSSWF  | 2  | 1 | 1 | 1 | 559  | 64    | 8.12  |       |       |       |       |       |       |       |       |
| Q96RR4    | Calcium/ca   | MSSCVSSQ  | 2  | 1 | 1 | 1 | 588  | 64.7  | 6.68  |       |       |       |       |       |       |       |       |
| A0A0R4J2F | Spermatog    | MPRAQLLE  | 1  | 1 | 2 | 1 | 1361 | 150   | 8.81  | 78.2  | 53.8  | 56.5  | 70.6  | 68.9  | 36.4  | 52.8  | 22.3  |
| P25391    | Laminin su   | MRGGVLLV  | 0  | 1 | 2 | 1 | 3075 | 336.9 | 6.35  | 83.6  | 71.2  | 80.7  | 80.8  | 84.7  | 74    | 49.1  | 67.6  |
| A0A0G2JN  | Transcripti  | MFRRARLS  | 0  | 1 | 5 | 1 | 2624 | 293.7 | 5.11  |       |       |       |       |       |       |       |       |
| E5RG27    | Casein kin   | MASSSGSK  | 17 | 1 | 1 | 1 | 78   | 8.5   | 9.7   | 125   | 109   | 168.1 | 173.4 | 152.4 | 80    | 88.9  | 115.8 |
| Q12841    | Follistatin- | MWKRWLA   | 3  | 1 | 1 | 1 | 308  | 35    | 5.52  | 34.7  | 35.6  | 29.1  | 27.7  | 31.4  | 39.1  | 31.4  | 26.6  |
| Q92833    | Protein Jur  | MskerPKR  | 1  | 1 | 7 | 1 | 1246 | 138.6 | 9.38  | 532.8 | 542.3 | 572.6 | 447.8 | 479.1 | 615.9 | 610.2 | 606.3 |
| J3KMX3    | Alpha-feto   | MKWVESIF  | 1  | 1 | 3 | 1 | 622  | 70.4  | 5.55  | 292.2 | 88.4  | 153.4 | 117.6 | 104.8 | 75.4  | 46.4  | 61.9  |
| R4GMU1    | GDH/6PGL     | MLAEPFNV  | 1  | 1 | 2 | 1 | 802  | 90.1  | 7.23  | 63    | 46.1  | 62.3  | 49.4  | 56.1  | 53.7  | 39.6  | 47.6  |
| Q14766    | Latent-trar  | MAGAWLR   | 1  | 1 | 1 | 1 | 1721 | 186.7 | 5.96  | 34.6  | 33.9  | 34.6  | 32.3  | 33.2  | 26.6  | 38    | 32.2  |
| A0A068LR  | Ig heavy ch  | QVTLRESGI | 6  | 1 | 4 | 1 | 127  | 14    | 8.15  | 84.7  | 83.7  | 147   | 163.1 | 112.7 | 102.3 | 73.3  | 104.6 |
| K7ELC7    | 60S riboso   | XRKAVIVKV | 14 | 1 | 1 | 1 | 144  | 16.5  | 10.58 |       |       |       |       |       |       |       |       |
| A0A1B0GV  | GRAM don     | MVQNLQP   | 3  | 1 | 1 | 1 | 767  | 88.6  | 6.44  | 45.3  | 36    | 32.6  | 36.1  | 41.3  | 36.9  | 46.9  | 33.8  |
| V9HW26    | ATP syntha   | MLSVRVAA  | 1  | 1 | 2 | 1 | 553  | 59.7  | 9.13  | 175.9 | 164.9 | 168.9 | 169.9 | 162.5 | 110.7 | 140.9 | 117.8 |
| Q9H628    | Ras-relatec  | MSNFLHLK  | 4  | 1 | 3 | 1 | 205  | 23.8  | 9.51  | 209.3 | 167.6 | 194   | 317.1 | 223.3 | 295.1 | 349.6 | 196   |
| B2RDG0    | Proteasom    | MSRRYDSR  | 3  | 1 | 2 | 1 | 261  | 29.4  | 7.72  | 143.8 | 116.1 | 156.9 | 166.8 | 127.9 | 113.5 | 120.2 | 67.9  |
| Q8WWZ8    | Oncoprote    | MPPFLLTC  | 2  | 1 | 1 | 1 | 545  | 60    | 5.58  | 61.3  | 50.8  | 61.7  | 76.5  | 55.4  | 45.1  | 43.2  | 53.5  |
| Q9Y5Z9    | UbiA preny   | MAASQVLC  | 3  | 1 | 1 | 1 | 338  | 36.8  | 8.15  | 94.4  | 89.7  | 109.1 | 111.7 | 112   | 82.5  | 80.9  | 81.4  |
| B2R7N9    | cDNA, FLJ9   | MGFLSPIY  | 2  | 1 | 1 | 1 | 421  | 49.4  | 5.52  |       |       |       |       |       |       |       |       |
| A0A024R8  | Glucosidas   | MGVRHPP   | 1  | 1 | 1 | 1 | 952  | 105.3 | 6     | 61.9  | 56.9  | 74.9  | 75    | 63.9  | 66.8  | 42    | 61.2  |
| Q96JG6    | Syndetin O   | MQKIKSLM  | 1  | 1 | 4 | 1 | 964  | 111.1 | 6.2   | 269.8 | 285.1 | 225.2 | 172.5 | 241.3 | 264.5 | 189.2 | 264.9 |
| Q66K66    | Transmem     | MPGTVATL  | 3  | 1 | 5 | 1 | 360  | 39.4  | 9.92  | 650.3 | 714.8 | 829.3 | 821.1 | 623.6 | 527.9 | 380.9 | 522.4 |
| A0A024R7  | DNA (cytos   | MAGSVPSF  | 1  | 1 | 2 | 1 | 1678 | 189.4 | 8.02  |       |       |       |       |       |       |       |       |
| Q6ZWJ1    | Syntaxin-bi  | MNKNTSTV  | 3  | 1 | 2 | 1 | 553  | 61.6  | 5.2   |       |       |       |       |       |       |       |       |

| Uniprot<br>Accession | Protein amino<br>acid sequence     | Protein amino<br>acid sequence<br>matching<br>degree(%) | The<br>number of<br>peptides<br>identified | The total<br>number of<br>polypeptide<br>was identified | The number of<br>characteristic<br>peptides<br>identified | Amino<br>acid length | KDa  | isoelectric<br>point | relative abundance of<br>normalized protein - sample<br>113 | relative abundance of<br>normalized protein -<br>control sample 121 | ratio(113/121) |             |
|----------------------|------------------------------------|---------------------------------------------------------|--------------------------------------------|---------------------------------------------------------|-----------------------------------------------------------|----------------------|------|----------------------|-------------------------------------------------------------|---------------------------------------------------------------------|----------------|-------------|
| J3KMX3               | Alpha-feto MKWVESIFLIFLL           | 1                                                       | 1                                          | 1                                                       | 3                                                         | 1                    | 622  | 70.4                 | 5.55                                                        | 292.2                                                               | 61.9           | 4.720516963 |
| A0A0R4J2F            | Spermatog MPRAQLLESNAF             | 1                                                       | 1                                          | 1                                                       | 2                                                         | 1                    | 1361 | 150                  | 8.81                                                        | 78.2                                                                | 22.3           | 3.506726457 |
| B2R4R0               | Histone H4 MSGRGKGGKGLI            | 17                                                      | 2                                          | 2                                                       | 10                                                        | 2                    | 103  | 11.4                 | 11.36                                                       | 875.9                                                               | 266.4          | 3.287912913 |
| Q05639               | Elongation MGKEKTHINIVVI           | 2                                                       | 1                                          | 1                                                       | 2                                                         | 1                    | 463  | 50.4                 | 9.03                                                        | 127.6                                                               | 40.3           | 3.166253102 |
| G9K388               | YWHAE/FA RADPAGAAAAM               | 5                                                       | 2                                          | 2                                                       | 5                                                         | 2                    | 384  | 41.2                 | 4.97                                                        | 382.4                                                               | 139.1          | 2.749101366 |
| A8K486               | Peptidyl-pi MVNPTVFFDIAV           | 5                                                       | 1                                          | 1                                                       | 1                                                         | 1                    | 165  | 18                   | 6.9                                                         | 24.4                                                                | 9.5            | 2.568421053 |
| D6W5K2               | Thymosin, GVSSRFPERGNV             | 4                                                       | 1                                          | 1                                                       | 1                                                         | 1                    | 169  | 17.9                 | 10.48                                                       | 215                                                                 | 88             | 2.443181818 |
| B2RDG0               | Proteasom MSRRYDSRTTIFS            | 3                                                       | 1                                          | 1                                                       | 2                                                         | 1                    | 261  | 29.4                 | 7.72                                                        | 143.8                                                               | 67.9           | 2.117820324 |
| E2RVJ0               | Anion excl MEELQDDYEDM             | 3                                                       | 2                                          | 2                                                       | 4                                                         | 2                    | 912  | 101.9                | 5.22                                                        | 45.7                                                                | 23.2           | 1.969827586 |
| Q9BWP8               | Collectin-1 MRGNLALVGVLI           | 6                                                       | 2                                          | 2                                                       | 2                                                         | 2                    | 271  | 28.6                 | 5.41                                                        | 36                                                                  | 18.3           | 1.967213115 |
| P98160               | Basement MGWRAAGALLL               | 1                                                       | 2                                          | 2                                                       | 3                                                         | 2                    | 4391 | 468.5                | 6.51                                                        | 180.2                                                               | 91.9           | 1.960826986 |
| P35908               | Keratin, tyi MSCQISCKSRGR          | 19                                                      | 10                                         | 10                                                      | 39                                                        | 5                    | 639  | 65.4                 | 8                                                           | 1259.7                                                              | 701.5          | 1.79572345  |
| V9HW31               | ATP synth MLGFVGRVAAA              | 4                                                       | 2                                          | 2                                                       | 4                                                         | 2                    | 529  | 56.5                 | 5.4                                                         | 149.2                                                               | 83.6           | 1.784688995 |
| P04040               | Catalase O MADSRDPASDQ             | 7                                                       | 3                                          | 3                                                       | 5                                                         | 3                    | 527  | 59.7                 | 7.39                                                        | 325.4                                                               | 182.4          | 1.783991228 |
| Q59EA3               | Cadherin 5 TDRQSNGTETSL            | 7                                                       | 5                                          | 5                                                       | 13                                                        | 5                    | 807  | 89.9                 | 5.48                                                        | 558.2                                                               | 314            | 1.777707006 |
| Q76LX8               | A disintegr MHQRHPRARCP            | 4                                                       | 5                                          | 5                                                       | 9                                                         | 5                    | 1427 | 153.5                | 7.17                                                        | 543.8                                                               | 311.2          | 1.747429306 |
| Q96AN5               | Transmem MTVELWLRLRGK              | 3                                                       | 1                                          | 1                                                       | 4                                                         | 1                    | 459  | 51.7                 | 9.67                                                        | 156.9                                                               | 90             | 1.743333333 |
| A0A024R4I            | Fibronectin MLRGPGLLLLL            | 22                                                      | 43                                         | 43                                                      | 227                                                       | 43                   | 2355 | 259                  | 5.73                                                        | 14350.7                                                             | 8653           | 1.658465272 |
| V9HVV1               | Epididymis MKRMVSWSFHK             | 2                                                       | 1                                          | 1                                                       | 1                                                         | 1                    | 491  | 55.9                 | 8.27                                                        | 85.5                                                                | 51.6           | 1.656976744 |
| Q9HCC1               | Single chain EVQLVESGGGVV          | 37                                                      | 3                                          | 3                                                       | 8                                                         | 1                    | 112  | 12.2                 | 8.47                                                        | 31.1                                                                | 19             | 1.636842105 |
| A0A024RD             | SPARC-like MKTGLFFLLCLLT           | 2                                                       | 1                                          | 1                                                       | 3                                                         | 1                    | 664  | 75.2                 | 4.81                                                        | 108.7                                                               | 67.4           | 1.612759644 |
| H6VRG1               | Keratin 1 C MSRQFSSRSGYR           | 26                                                      | 15                                         | 15                                                      | 79                                                        | 13                   | 645  | 66.1                 | 8.12                                                        | 3451.6                                                              | 2159.3         | 1.598480989 |
| P07333               | Macrophage MGPGVLLLLLVA            | 3                                                       | 2                                          | 2                                                       | 3                                                         | 2                    | 972  | 107.9                | 6.37                                                        | 52.1                                                                | 32.6           | 1.598159509 |
| B7ZMD7               | Alpha-amyl MKLFWLLFTIGFC           | 3                                                       | 1                                          | 1                                                       | 1                                                         | 1                    | 511  | 57.7                 | 6.93                                                        | 56.2                                                                | 35.3           | 1.592067989 |
| Q96RZ2               | N-acetylglut MAAGLARLLLLL          | 3                                                       | 1                                          | 1                                                       | 1                                                         | 1                    | 331  | 36.8                 | 6.79                                                        | 70.6                                                                | 45             | 1.568888889 |
| P07737               | Profilin-1 C MAGWNAYIDNL           | 27                                                      | 3                                          | 3                                                       | 12                                                        | 3                    | 140  | 15                   | 8.27                                                        | 387.8                                                               | 247.6          | 1.566235864 |
| D3DPK5               | SH3 domain KQLKPSKAPSPV            | 4                                                       | 1                                          | 1                                                       | 1                                                         | 1                    | 257  | 26.8                 | 8.38                                                        | 99                                                                  | 63.5           | 1.559055118 |
| P02533               | Keratin, tyi MTTCSRQFTSSSS         | 16                                                      | 8                                          | 8                                                       | 40                                                        | 2                    | 472  | 51.5                 | 5.16                                                        | 86.1                                                                | 55.3           | 1.556962025 |
| P37802               | Transgelin MANRGPAYGLSI            | 30                                                      | 5                                          | 5                                                       | 14                                                        | 5                    | 199  | 22.4                 | 8.25                                                        | 690.4                                                               | 445.5          | 1.549719416 |
| B2R773               | cDNA, FLJ9 MLLLGAVLLLLAL           | 12                                                      | 2                                          | 2                                                       | 6                                                         | 2                    | 244  | 26.4                 | 5.74                                                        | 835.1                                                               | 546.2          | 1.528927133 |
| A0A140GX             | Platelet membrane MGSGPRGALSLL     | 5                                                       | 1                                          | 1                                                       | 1                                                         | 1                    | 206  | 21.7                 | 8.91                                                        | 62.2                                                                | 40.9           | 1.520782396 |
| Q13740               | CD166 antigen MESKGASSCRLLI        | 2                                                       | 1                                          | 1                                                       | 1                                                         | 1                    | 583  | 65.1                 | 6.25                                                        | 60                                                                  | 39.8           | 1.507537688 |
| P13645               | Keratin, tyi MSVRYSSSKHYS          | 19                                                      | 12                                         | 12                                                      | 89                                                        | 9                    | 584  | 58.8                 | 5.21                                                        | 6299.9                                                              | 4187.6         | 1.504417805 |
| V9HW26               | ATP synth MLSVRVAAAVVF             | 1                                                       | 1                                          | 1                                                       | 2                                                         | 1                    | 553  | 59.7                 | 9.13                                                        | 175.9                                                               | 117.8          | 1.493208829 |
| P10909               | Clusterin C MMKTLFFFVGLL           | 39                                                      | 18                                         | 18                                                      | 653                                                       | 18                   | 449  | 52.5                 | 6.27                                                        | 50095.5                                                             | 33598.7        | 1.490995187 |
| J3KPS3               | Fructose-bisphosphate MPYQYPALTPEC | 8                                                       | 2                                          | 2                                                       | 2                                                         | 2                    | 368  | 39.8                 | 8.09                                                        | 197.8                                                               | 133.9          | 1.477221807 |
| E7EQ64               | Trypsin-1 C MNPLLILTFVAA           | 11                                                      | 2                                          | 2                                                       | 20                                                        | 2                    | 261  | 28.1                 | 7.25                                                        | 485.9                                                               | 329.5          | 1.474658574 |



|           |              |                |    |    |      |    |      |       |      |        |        |             |
|-----------|--------------|----------------|----|----|------|----|------|-------|------|--------|--------|-------------|
| Q6UY14    | ADAMTS-li    | MENWTGRPWL     | 2  | 1  | 1    | 1  | 1074 | 116.5 | 8.34 | 62.8   | 42.9   | 1.463869464 |
| Q8WZ75    | Roundaboi    | MGSGGDSLLGGI   | 2  | 1  | 3    | 1  | 1007 | 107.4 | 6.64 | 221.9  | 152.6  | 1.45412844  |
| P67936    | Tropomyo     | MAGLNSLEAVKF   | 8  | 2  | 4    | 2  | 248  | 28.5  | 4.69 | 474    | 328.1  | 1.4446815   |
| P06733    | Alpha-enol   | MSILKIHAREIFD  | 3  | 1  | 2    | 1  | 434  | 47.1  | 7.39 | 71.8   | 49.7   | 1.444668008 |
| A0N5G5    | Rheumato     | EIVLTQSPATLSLS | 23 | 2  | 9    | 2  | 118  | 12.8  | 8.97 | 136.1  | 94.5   | 1.44021164  |
| A8K430    | Fructose-b   | MAHRFPALTQEC   | 21 | 5  | 9    | 5  | 364  | 39.4  | 8.21 | 159.5  | 111.1  | 1.435643564 |
| P05164    | Myeloper     | MGVPPFSSLRVM   | 7  | 5  | 7    | 5  | 745  | 83.8  | 8.97 | 216.2  | 150.6  | 1.435590969 |
| B4DQY7    | cDNA FLJ5    | MSWFNASQLSSI   | 1  | 1  | 1    | 1  | 992  | 111.7 | 4.87 | 22.3   | 15.6   | 1.429487179 |
| A0A1C9J6F | B cell rece  | EVQLVQSGGGV    | 14 | 1  | 2    | 1  | 132  | 14.6  | 8.02 | 87.8   | 61.6   | 1.425324675 |
| P07996    | Thrombos     | MGLAWGLGVLF    | 37 | 39 | 390  | 1  | 1170 | 129.3 | 4.94 | 557.4  | 392.8  | 1.41904277  |
| Q9H8L6    | Multimerir   | MILSLLFSLGGPL  | 2  | 2  | 3    | 2  | 949  | 104.3 | 5.86 | 227.9  | 160.8  | 1.417288557 |
| X6R8F3    | Neutrophil   | MPLGLLWLGLAL   | 14 | 2  | 6    | 2  | 200  | 22.8  | 8.5  | 369.7  | 264.9  | 1.395620989 |
| Q6EMK4    | Vasorin OS   | MCSRVPLLLPLLL  | 6  | 3  | 13   | 3  | 673  | 71.7  | 7.39 | 507    | 363.3  | 1.395540875 |
| P19320    | Vascular c   | MPGKMVVILGA    | 5  | 3  | 4    | 3  | 739  | 81.2  | 5.22 | 165.9  | 119.6  | 1.387123746 |
| A0A024R9  | Proteoglyc   | MAWKTLPIYLLLL  | 11 | 15 | 34   | 7  | 1404 | 151   | 9.5  | 4220.7 | 3044.2 | 1.386472636 |
| Q8NBP7    | Proprotein   | MGTVSSRRSWM    | 5  | 3  | 4    | 3  | 692  | 74.2  | 6.61 | 190.5  | 138.5  | 1.375451264 |
| B2R6W1    | cDNA, FLJ9   | MKVISLFILVGFIC | 48 | 35 | 595  | 2  | 843  | 93.5  | 6.48 | 467.6  | 340    | 1.375294118 |
| A0A0S2Z4  | HCG20398     | MASTSTTIRSHSS  | 9  | 6  | 20   | 3  | 564  | 60    | 8    | 557.3  | 406.5  | 1.37097171  |
| Q86U17    | Serpin A11   | MGPALWLLGT     | 2  | 1  | 1    | 1  | 422  | 47    | 7.68 | 74     | 54     | 1.37037037  |
| P21333    | Filamin-A    | (MSSSHSRAGQSA  | 2  | 4  | 8    | 4  | 2647 | 280.6 | 6.06 | 169.3  | 123.6  | 1.3697411   |
| Q99969    | Retinoic ac  | MRRLLIPLALWLC  | 7  | 1  | 2    | 1  | 163  | 18.6  | 9.09 | 55.7   | 40.7   | 1.368550369 |
| P63261    | Actin, cyto  | MEEEEIALVIDNC  | 46 | 12 | 73   | 5  | 375  | 41.8  | 5.48 | 5034.2 | 3679   | 1.368360968 |
| A8KAJ3    | cDNA FLJ7    | MLKALFLTMLTL   | 24 | 10 | 39   | 10 | 493  | 54.6  | 5.14 | 1837.5 | 1343.2 | 1.368001787 |
| E9KL23    | Epididymis   | MPSSVSWGILL    | 61 | 31 | 1738 | 1  | 418  | 46.7  | 5.59 | 8613.5 | 6306.2 | 1.365878025 |
| P18065    | Insulin-like | MLPRVGCALPL    | 22 | 5  | 11   | 5  | 325  | 34.8  | 7.5  | 411.4  | 301.5  | 1.364510779 |
| A8K5T0    | cDNA FLJ7    | MRLAKIICMLV    | 57 | 64 | 2215 | 1  | 1231 | 138.9 | 6.71 | 2166.5 | 1595.6 | 1.35779644  |
| P35527    | Keratin, ty  | MSCRQFSSSYLSF  | 13 | 8  | 64   | 7  | 623  | 62    | 5.24 | 4828.9 | 3567.9 | 1.353429188 |
| Q9UIU0    | Dihydropy    | MAAGCLLALTLTI  | 2  | 2  | 4    | 2  | 1110 | 125.2 | 5.36 | 86.9   | 64.3   | 1.351477449 |
| P12111    | Collagen al  | MRKHRHPLVA     | 1  | 3  | 6    | 3  | 3177 | 343.5 | 6.68 | 112.8  | 83.9   | 1.344457688 |
| A0A1B0GV  | GRAM don     | MVQNLQPETVSC   | 3  | 1  | 1    | 1  | 767  | 88.6  | 6.44 | 45.3   | 33.8   | 1.340236686 |
| Q59EB6    | Compleme     | KLLSPLGFSPPAE  | 2  | 1  | 2    | 1  | 671  | 70.4  | 5.44 | 66.1   | 49.4   | 1.33805668  |
| B3KQF4    | cDNA FLJ9    | MAPFEPLASGILL  | 19 | 3  | 13   | 3  | 207  | 23.2  | 8.1  | 222.9  | 166.7  | 1.337132573 |
| P14780    | Matrix me    | MSLWQPLVLL     | 18 | 11 | 38   | 11 | 707  | 78.4  | 6.06 | 1945.1 | 1462.7 | 1.329801053 |
| P00918    | Carbonic a   | MSHHWGYGKHI    | 12 | 3  | 5    | 3  | 260  | 29.2  | 7.4  | 163.1  | 122.8  | 1.328175896 |
| Q15485    | Ficolin-2    | O MELDRAVGVLG  | 15 | 6  | 19   | 6  | 313  | 34    | 6.77 | 1636.6 | 1232.5 | 1.327870183 |
| P35443    | Thrombos     | MLAPRGAAVLLL   | 3  | 2  | 6    | 1  | 961  | 105.8 | 4.68 | 47.3   | 35.7   | 1.324929972 |
| R4GMU1    | GDH/6PGL     | MLAEPFNWHPG    | 1  | 1  | 2    | 1  | 802  | 90.1  | 7.23 | 63     | 47.6   | 1.323529412 |
| D6W5L6    | Pulmonary    | MHQAGYPGCRG    | 3  | 1  | 2    | 1  | 393  | 43.3  | 5.74 | 35.8   | 27.1   | 1.32103321  |
| Q8NF17    | FLJ00385     | f LWLWGREWAK   | 23 | 10 | 100  | 2  | 509  | 56.1  | 7.59 | 320.1  | 242.4  | 1.320544554 |
| Q9UL72    | Myosin-re    | EVQLVESGGGLV   | 25 | 2  | 40   | 1  | 118  | 12.9  | 6.58 | 481.2  | 364.5  | 1.320164609 |
| A8K3K1    | cDNA FLJ7    | MCDDEETTALVC   | 31 | 9  | 48   | 2  | 377  | 42    | 5.39 | 82.1   | 62.2   | 1.319935691 |
| P11279    | Lysosome-    | MAAPGSARRPLL   | 4  | 2  | 3    | 2  | 417  | 44.9  | 8.75 | 315.2  | 238.8  | 1.319932998 |

|           |                            |    |    |      |    |      |       |      |         |         |             |
|-----------|----------------------------|----|----|------|----|------|-------|------|---------|---------|-------------|
| O00151    | PDZ and LI MTTQQIDLQGPC    | 3  | 1  | 1    | 1  | 329  | 36    | 7.02 | 103.2   | 78.2    | 1.319693095 |
| E9PFZ2    | Ceruloplas MKILILGIFLFLCST | 53 | 46 | 2570 | 1  | 946  | 108.8 | 5.77 | 305.6   | 232     | 1.317241379 |
| B2R6V9    | cDNA, FLJ9 MSETSRTAFGGR    | 2  | 1  | 1    | 1  | 732  | 83.2  | 6    | 69.4    | 52.7    | 1.316888046 |
| B1AHL2    | Fibulin-1 C MERAAPSRRVPL   | 7  | 4  | 8    | 4  | 721  | 78.3  | 5.39 | 239.3   | 181.8   | 1.316281628 |
| A8K6C9    | cDNA FLJ7 MGIPMGKSMMLV     | 14 | 2  | 22   | 2  | 180  | 20.2  | 9.32 | 1228.8  | 934.1   | 1.315490847 |
| A0A024RD  | Phospholip MVPPKLHVLFLCL   | 8  | 3  | 8    | 3  | 441  | 50    | 7.56 | 565     | 431.5   | 1.309385863 |
| P04196    | Histidine-r MKALIAALLLITLC | 51 | 21 | 685  | 1  | 525  | 59.5  | 7.5  | 866.1   | 661.8   | 1.308703536 |
| P33908    | Mannosyl- MPVGGLLPLFSSF    | 7  | 4  | 11   | 4  | 653  | 72.9  | 6.47 | 388.2   | 296.9   | 1.307510946 |
| B7Z8B6    | cDNA FLJ5 MNKNVVFVIDIS     | 27 | 10 | 354  | 3  | 623  | 69.5  | 6.16 | 4851.3  | 3715.2  | 1.305797804 |
| A0A161I20 | Lactoferrin MKLVFLVLLFLGA  | 25 | 14 | 36   | 14 | 711  | 78.3  | 8.18 | 1147.8  | 879.4   | 1.305208096 |
| V9HWB4    | Epididymis MKLSLVAAMLLL    | 12 | 7  | 17   | 7  | 654  | 72.3  | 5.16 | 779.4   | 597.3   | 1.304871924 |
| Q12841    | Follistatin- MWKRWLALALA   | 3  | 1  | 1    | 1  | 308  | 35    | 5.52 | 34.7    | 26.6    | 1.304511278 |
| O00533    | Neural cell MEPLLLGRGLIVY  | 4  | 5  | 13   | 5  | 1208 | 135   | 5.76 | 401.8   | 308.4   | 1.302853437 |
| P08779    | Keratin, tyj MTTCSRQFTSSSS | 16 | 9  | 45   | 3  | 473  | 51.2  | 5.05 | 1891.4  | 1452.8  | 1.30189978  |
| P02741    | C-reactive MEKLLCFLVLTSL   | 24 | 6  | 38   | 6  | 224  | 25    | 5.63 | 830.7   | 1082.9  | 0.767106843 |
| V9GYM3    | Apolipoproc MCEQHPKRPGLC   | 32 | 6  | 446  | 6  | 133  | 14.9  | 8.27 | 44115.6 | 58257.6 | 0.757250556 |
| B7Z3G0    | cDNA FLJ5 MSARRTSHGEPK     | 2  | 1  | 16   | 1  | 833  | 94.1  | 6.87 | 219.8   | 295.9   | 0.74281852  |
| Q8IXL6    | Extracellul MKMMLVRRFRV    | 3  | 1  | 1    | 1  | 584  | 66.2  | 7.74 | 88.7    | 121.2   | 0.731848185 |
| Q99727    | Metallopro MPGSPRPAPSW     | 6  | 1  | 16   | 1  | 224  | 25.5  | 7.8  | 93.4    | 135     | 0.691851852 |

| Uniprot<br>Accession<br>Number | Protein<br>name   | Protein<br>amino acid<br>sequence | Protein<br>amino acid<br>sequence<br>matching<br>degree(%) | The<br>number of<br>peptides<br>identified | The<br>total<br>number of<br>times a<br>polypepti<br>de was<br>identified | The<br>number of<br>characteri<br>stic<br>peptides<br>identified | Amino<br>acid length | KDa   | isoelectric<br>point | relative<br>abundanc<br>e of<br>normalize<br>d protein -<br>control |               |                    |
|--------------------------------|-------------------|-----------------------------------|------------------------------------------------------------|--------------------------------------------|---------------------------------------------------------------------------|------------------------------------------------------------------|----------------------|-------|----------------------|---------------------------------------------------------------------|---------------|--------------------|
|                                |                   |                                   |                                                            |                                            |                                                                           |                                                                  |                      |       |                      | sample<br>114                                                       | sample<br>121 | ratio(114/<br>121) |
| E9PFZ2                         | Ceruloplas        | MKILILGIFL                        | 53                                                         | 46                                         | 2570                                                                      | 1                                                                | 946                  | 108.8 | 5.77                 | 1344.1                                                              | 232           | 5.793534           |
| Q96AN5                         | Transmem          | MTVELWLF                          | 3                                                          | 1                                          | 4                                                                         | 1                                                                | 459                  | 51.7  | 9.67                 | 268.8                                                               | 90            | 2.986667           |
| Q05639                         | Elongation        | MGKEKTHI                          | 2                                                          | 1                                          | 2                                                                         | 1                                                                | 463                  | 50.4  | 9.03                 | 111.4                                                               | 40.3          | 2.764268           |
| B2R4R0                         | Histone H4        | MSGRGKG                           | 17                                                         | 2                                          | 10                                                                        | 2                                                                | 103                  | 11.4  | 11.36                | 676.1                                                               | 266.4         | 2.537913           |
| Q9HCI6                         | E3 SUMO- $\gamma$ | MGDPGSEI                          | 1                                                          | 1                                          | 6                                                                         | 1                                                                | 787                  | 89.6  | 7.74                 | 614.6                                                               | 247.6         | 2.482229           |
| V9HVV1                         | Epididymis        | MKRMVSM                           | 2                                                          | 1                                          | 1                                                                         | 1                                                                | 491                  | 55.9  | 8.27                 | 127.8                                                               | 51.6          | 2.476744           |
| A0A0R4J2F                      | Spermatog         | MPRAQLLE                          | 1                                                          | 1                                          | 2                                                                         | 1                                                                | 1361                 | 150   | 8.81                 | 53.8                                                                | 22.3          | 2.412556           |
| G9K388                         | YWHAE/FA          | RADPAGAA                          | 5                                                          | 2                                          | 5                                                                         | 2                                                                | 384                  | 41.2  | 4.97                 | 307.1                                                               | 139.1         | 2.207764           |
| D6W5K2                         | Thymosin,         | GVSSRFPEF                         | 4                                                          | 1                                          | 1                                                                         | 1                                                                | 169                  | 17.9  | 10.48                | 183.4                                                               | 88            | 2.084091           |
| B2R773                         | cDNA, FLJ9        | MLLLGAVL                          | 12                                                         | 2                                          | 6                                                                         | 2                                                                | 244                  | 26.4  | 5.74                 | 1129.4                                                              | 546.2         | 2.067741           |
| A8K486                         | Peptidyl-pr       | MVNPTVFF                          | 5                                                          | 1                                          | 1                                                                         | 1                                                                | 165                  | 18    | 6.9                  | 19                                                                  | 9.5           | 2                  |
| P02776                         | Platelet fac      | MSSAAGFC                          | 36                                                         | 4                                          | 140                                                                       | 2                                                                | 101                  | 10.8  | 8.62                 | 14120.9                                                             | 7708.1        | 1.831956           |
| E2RVJ0                         | Anion exch        | MEELQDD\                          | 3                                                          | 2                                          | 4                                                                         | 2                                                                | 912                  | 101.9 | 5.22                 | 41.6                                                                | 23.2          | 1.793103           |
| B2RDG0                         | Proteasom         | MSRRYDSR                          | 3                                                          | 1                                          | 2                                                                         | 1                                                                | 261                  | 29.4  | 7.72                 | 116.1                                                               | 67.9          | 1.709867           |
| V9HW31                         | ATP syntha        | MLGFVGR\                          | 4                                                          | 2                                          | 4                                                                         | 2                                                                | 529                  | 56.5  | 5.4                  | 140.3                                                               | 83.6          | 1.67823            |
| D3DPK5                         | SH3 domai         | QLKPSKAI                          | 4                                                          | 1                                          | 1                                                                         | 1                                                                | 257                  | 26.8  | 8.38                 | 106.2                                                               | 63.5          | 1.672441           |
| Q59EA3                         | Cadherin 5        | TDRQSNGT                          | 7                                                          | 5                                          | 13                                                                        | 5                                                                | 807                  | 89.9  | 5.48                 | 497.9                                                               | 314           | 1.585669           |
| Q9BWP8                         | Collectin-1       | MRGNLAL\                          | 6                                                          | 2                                          | 2                                                                         | 2                                                                | 271                  | 28.6  | 5.41                 | 28.1                                                                | 18.3          | 1.535519           |
| P04196                         | Histidine-ri      | MKALIAALI                         | 51                                                         | 21                                         | 685                                                                       | 1                                                                | 525                  | 59.5  | 7.5                  | 992.4                                                               | 661.8         | 1.499547           |
| H6VRG1                         | Keratin 1 C       | MSRQFSSR                          | 26                                                         | 15                                         | 79                                                                        | 13                                                               | 645                  | 66.1  | 8.12                 | 3228.1                                                              | 2159.3        | 1.494975           |
| A0A024R4I                      | Fibronectin       | MLRGPGPC                          | 22                                                         | 43                                         | 227                                                                       | 43                                                               | 2355                 | 259   | 5.73                 | 12920.5                                                             | 8653          | 1.493182           |
| Q96RZ2                         | N-acetylglu       | MAAGLARI                          | 3                                                          | 1                                          | 1                                                                         | 1                                                                | 331                  | 36.8  | 6.79                 | 65.6                                                                | 45            | 1.457778           |
| P05164                         | Myeloper          | MGVPPFSS                          | 7                                                          | 5                                          | 7                                                                         | 5                                                                | 745                  | 83.8  | 8.97                 | 219.4                                                               | 150.6         | 1.456839           |
| H3BQD0                         | Cerebellin-       | MLGVLELLI                         | 11                                                         | 1                                          | 2                                                                         | 1                                                                | 140                  | 14.7  | 5.48                 | 18.9                                                                | 13            | 1.453846           |
| J3KMX3                         | Alpha-feto        | MKWVESIF                          | 1                                                          | 1                                          | 3                                                                         | 1                                                                | 622                  | 70.4  | 5.55                 | 88.4                                                                | 61.9          | 1.42811            |

|           |                                        |    |     |      |     |      |       |      |          |          |          |
|-----------|----------------------------------------|----|-----|------|-----|------|-------|------|----------|----------|----------|
| P07737    | Profilin-1 C MAGWNA\                   | 27 | 3   | 12   | 3   | 140  | 15    | 8.27 | 353.3    | 247.6    | 1.426898 |
| COJYY2    | Apolipoprc MDPPRPAL                    | 48 | 227 | 8770 | 178 | 4563 | 515.2 | 7.05 | 722432.2 | 510456.9 | 1.415266 |
| P37802    | Transgelin- MANRGPA\                   | 30 | 5   | 14   | 5   | 199  | 22.4  | 8.25 | 625.6    | 445.5    | 1.404265 |
| V9HW26    | ATP synthα MLSVRVAA                    | 1  | 1   | 2    | 1   | 553  | 59.7  | 9.13 | 164.9    | 117.8    | 1.39983  |
| P67936    | Tropomyo: MAGLNSLE                     | 8  | 2   | 4    | 2   | 248  | 28.5  | 4.69 | 453.2    | 328.1    | 1.381286 |
| P98160    | Basement I MGWRAAC                     | 1  | 2   | 3    | 2   | 4391 | 468.5 | 6.51 | 126.8    | 91.9     | 1.379761 |
| Q66K66    | Transmem MPGTVATL                      | 3  | 1   | 5    | 1   | 360  | 39.4  | 9.92 | 714.8    | 522.4    | 1.3683   |
| P35908    | Keratin, tyj MSCQISCK\                 | 19 | 10  | 39   | 5   | 639  | 65.4  | 8    | 955      | 701.5    | 1.361368 |
| P10909    | Clusterin O MMKTLLLF                   | 39 | 18  | 653  | 18  | 449  | 52.5  | 6.27 | 45302.4  | 33598.7  | 1.348338 |
| Q12841    | Follistatin-I MWKRWLA                  | 3  | 1   | 1    | 1   | 308  | 35    | 5.52 | 35.6     | 26.6     | 1.338346 |
| X6R8F3    | Neutrophil MPLGLLWL                    | 14 | 2   | 6    | 2   | 200  | 22.8  | 8.5  | 353.7    | 264.9    | 1.335221 |
| E7EQ64    | Trypsin-1 C MNPLLILTF                  | 11 | 2   | 20   | 2   | 261  | 28.1  | 7.25 | 434      | 329.5    | 1.317147 |
| A0A024R0\ | Apolipoprc MRLFLSLP\                   | 40 | 7   | 232  | 7   | 83   | 9.3   | 8.47 | 26544.7  | 20202.7  | 1.313918 |
| A0A161I20 | Lactoferrin MKLVFLVLI                  | 25 | 14  | 36   | 14  | 711  | 78.3  | 8.18 | 1147.8   | 879.4    | 1.305208 |
| P00915    | Carbonic anhydrase I MASPDWG           | 36 | 7   | 55   | 7   | 261  | 28.9  | 7.12 | 2609.2   | 2002.4   | 1.303036 |
| P00918    | Carbonic anhydrase I MSHHWGY           | 12 | 3   | 5    | 3   | 260  | 29.2  | 7.4  | 160      | 122.8    | 1.302932 |
| B3KSS6    | Phosphodiesterase 1B MESPTKEIE         | 1  | 1   | 3    | 1   | 709  | 80.7  | 8.82 | 291.1    | 385.6    | 0.754927 |
| Q8IXL6    | Extracellular matrix protein 1 MKMMLVF | 3  | 1   | 1    | 1   | 584  | 66.2  | 7.74 | 82.9     | 121.2    | 0.683993 |
| A0A075B6I | Dynein heavy chain 1 MEKDAEDC          | 0  | 1   | 6    | 1   | 4707 | 538.3 | 6.13 | 89.2     | 130.9    | 0.681436 |
| B7Z3G0    | cDNA FLJ51327 MSARRTSH                 | 2  | 1   | 16   | 1   | 833  | 94.1  | 6.87 | 169.4    | 295.9    | 0.572491 |



| Uniprot<br>Accession<br>Number | Protein<br>name | Protein<br>amino acid<br>sequence<br>degree(%) | The<br>number of<br>peptides<br>identified | The total<br>number of<br>times a<br>polypepti<br>de was<br>identified | The<br>number of<br>characteri<br>peptides<br>identified | Amino<br>acid length | KDa  | isoelectric<br>point | relative<br>abundanc<br>e of<br>normalize<br>d protein -<br>control |               |                |          |
|--------------------------------|-----------------|------------------------------------------------|--------------------------------------------|------------------------------------------------------------------------|----------------------------------------------------------|----------------------|------|----------------------|---------------------------------------------------------------------|---------------|----------------|----------|
|                                |                 |                                                |                                            |                                                                        |                                                          |                      |      |                      | sample<br>115                                                       | sample<br>121 | ratio(115/121) |          |
| Q96AN5                         | Transmem        | MTVELWLF                                       | 3                                          | 1                                                                      | 4                                                        | 1                    | 459  | 51.7                 | 9.67                                                                | 443.2         | 90             | 4.924444 |
| V9HVY1                         | Epididymis      | MKRMVSM                                        | 2                                          | 1                                                                      | 1                                                        | 1                    | 491  | 55.9                 | 8.27                                                                | 209.8         | 51.6           | 4.065891 |
| B2R4R0                         | Histone H4      | MSGRGKG                                        | 17                                         | 2                                                                      | 10                                                       | 2                    | 103  | 11.4                 | 11.36                                                               | 749.1         | 266.4          | 2.811937 |
| G9K388                         | YWHAE/FA        | RADPAGAA                                       | 5                                          | 2                                                                      | 5                                                        | 2                    | 384  | 41.2                 | 4.97                                                                | 367.6         | 139.1          | 2.642703 |
| A0A0R4J2F                      | Spermatog       | MPRAQLLE                                       | 1                                          | 1                                                                      | 2                                                        | 1                    | 1361 | 150                  | 8.81                                                                | 56.5          | 22.3           | 2.533632 |
| J3KMX3                         | Alpha-feto      | MKWVESIF                                       | 1                                          | 1                                                                      | 3                                                        | 1                    | 622  | 70.4                 | 5.55                                                                | 153.4         | 61.9           | 2.478191 |
| B2RDG0                         | Proteasom       | MSRRYDSR                                       | 3                                          | 1                                                                      | 2                                                        | 1                    | 261  | 29.4                 | 7.72                                                                | 156.9         | 67.9           | 2.310751 |
| E2RVJ0                         | Anion exch      | MEELQDD                                        | 3                                          | 2                                                                      | 4                                                        | 2                    | 912  | 101.9                | 5.22                                                                | 51.8          | 23.2           | 2.232759 |
| Q9BWP8                         | Collectin-1     | MRGNLAL                                        | 6                                          | 2                                                                      | 2                                                        | 2                    | 271  | 28.6                 | 5.41                                                                | 40.2          | 18.3           | 2.196721 |
| Q05639                         | Elongation      | MGKEKTHI                                       | 2                                          | 1                                                                      | 2                                                        | 1                    | 463  | 50.4                 | 9.03                                                                | 84.2          | 40.3           | 2.08933  |
| A0A140GX                       | Platelet m      | MGSGPRG                                        | 5                                          | 1                                                                      | 1                                                        | 1                    | 206  | 21.7                 | 8.91                                                                | 81.4          | 40.9           | 1.99022  |
| A0A024R4                       | Fibronectin     | MLRGPGPC                                       | 22                                         | 43                                                                     | 227                                                      | 43                   | 2355 | 259                  | 5.73                                                                | 17208         | 8653           | 1.988674 |
| D3DPK5                         | SH3 domai       | KQLKPSKAI                                      | 4                                          | 1                                                                      | 1                                                        | 1                    | 257  | 26.8                 | 8.38                                                                | 123.2         | 63.5           | 1.940157 |
| A2J1N5                         | Rheumatoi       | VESGGGVV                                       | 23                                         | 2                                                                      | 5                                                        | 1                    | 94   | 10.4                 | 9.13                                                                | 218.9         | 112.9          | 1.938884 |
| Q59EA3                         | Cadherin 5      | TDRQSNGT                                       | 7                                          | 5                                                                      | 13                                                       | 5                    | 807  | 89.9                 | 5.48                                                                | 596.1         | 314            | 1.898408 |
| P06733                         | Alpha-enol      | MSILKI HAR                                     | 3                                          | 1                                                                      | 2                                                        | 1                    | 434  | 47.1                 | 7.39                                                                | 92.1          | 49.7           | 1.853119 |
| V9HW31                         | ATP synth       | MLGFVGR                                        | 4                                          | 2                                                                      | 4                                                        | 2                    | 529  | 56.5                 | 5.4                                                                 | 154.3         | 83.6           | 1.845694 |
| P02776                         | Platelet fac    | MSSAAGFC                                       | 36                                         | 4                                                                      | 140                                                      | 2                    | 101  | 10.8                 | 8.62                                                                | 14224.7       | 7708.1         | 1.845422 |
| P37802                         | Transgelin-     | MANRGPA                                        | 30                                         | 5                                                                      | 14                                                       | 5                    | 199  | 22.4                 | 8.25                                                                | 751.4         | 445.5          | 1.686644 |
| Q99969                         | Retinoic ac     | MRLLIPLA                                       | 7                                          | 1                                                                      | 2                                                        | 1                    | 163  | 18.6                 | 9.09                                                                | 68.1          | 40.7           | 1.673219 |
| D6W5K2                         | Thymosin,       | GVSSRFPEF                                      | 4                                          | 1                                                                      | 1                                                        | 1                    | 169  | 17.9                 | 10.48                                                               | 144.4         | 88             | 1.640909 |
| Q9H804                         | cDNA FLJ1       | MPGPRVW                                        | 21                                         | 7                                                                      | 38                                                       | 1                    | 438  | 48                   | 7.46                                                                | 254.6         | 156.4          | 1.627877 |
| P67936                         | Tropomyo        | MAGLNSLE                                       | 8                                          | 2                                                                      | 4                                                        | 2                    | 248  | 28.5                 | 4.69                                                                | 532.2         | 328.1          | 1.622066 |
| A0A125U0                       | GCT-A2 he       | EVQLVESG                                       | 15                                         | 1                                                                      | 1                                                        | 1                    | 126  | 13.8                 | 5.45                                                                | 30.3          | 18.9           | 1.603175 |
| Q66K66                         | Transmem        | MPGTVATL                                       | 3                                          | 1                                                                      | 5                                                        | 1                    | 360  | 39.4                 | 9.92                                                                | 829.3         | 522.4          | 1.587481 |

|            |                        |    |    |      |    |      |       |      |          |          |          |
|------------|------------------------|----|----|------|----|------|-------|------|----------|----------|----------|
| A0A1C9J6FB | cell receç EVQLVQSG    | 14 | 1  | 2    | 1  | 132  | 14.6  | 8.02 | 96.2     | 61.6     | 1.561688 |
| Q9NQ79     | Cartilage a MAPSADPC   | 7  | 5  | 13   | 5  | 661  | 71.4  | 5.12 | 1227.9   | 792.2    | 1.549987 |
| J3KPS3     | Fructose-b MPYQYPAL    | 8  | 2  | 2    | 2  | 368  | 39.8  | 8.09 | 206.9    | 133.9    | 1.545183 |
| P35443     | Thrombosç MLAPRGA/     | 3  | 2  | 6    | 1  | 961  | 105.8 | 4.68 | 54.5     | 35.7     | 1.526611 |
| Q6UY14     | ADAMTS-li MENWTGR      | 2  | 1  | 1    | 1  | 1074 | 116.5 | 8.34 | 65.4     | 42.9     | 1.524476 |
| A8K430     | Fructose-b MAHRFPAL    | 21 | 5  | 9    | 5  | 364  | 39.4  | 8.21 | 169.1    | 111.1    | 1.522052 |
| G3XAI2     | Laminin su MDCPLSAP    | 1  | 1  | 1    | 1  | 1810 | 200.3 | 4.96 | 150.7    | 99.6     | 1.513052 |
| B7ZMD7     | Alpha-amy MKLFWLLF     | 3  | 1  | 1    | 1  | 511  | 57.7  | 6.93 | 53.3     | 35.3     | 1.509915 |
| O00533     | Neural cell MEPLLLGR   | 4  | 5  | 13   | 5  | 1208 | 135   | 5.76 | 460.4    | 308.4    | 1.492866 |
| A8K3K1     | cDNA FLJ7 MCDDEETT     | 31 | 9  | 48   | 2  | 377  | 42    | 5.39 | 92.7     | 62.2     | 1.490354 |
| P04040     | Catalase O MADSRDP/    | 7  | 3  | 5    | 3  | 527  | 59.7  | 7.39 | 271      | 182.4    | 1.485746 |
| Q9UIU0     | Dihydropyr MAAGCLLA    | 2  | 2  | 4    | 2  | 1110 | 125.2 | 5.36 | 95.2     | 64.3     | 1.48056  |
| P02768     | Serum albu MKWVTFIS    | 62 | 47 | 4176 | 47 | 609  | 69.3  | 6.28 | 553515.2 | 374998.6 | 1.476046 |
| E9PFZ2     | Ceruloplası MKILILGIFL | 53 | 46 | 2570 | 1  | 946  | 108.8 | 5.77 | 340.1    | 232      | 1.465948 |
| Q59ED3     | Intercellulâ LIVTCSLQQ | 4  | 1  | 2    | 1  | 344  | 38.4  | 7.78 | 99.7     | 68.1     | 1.464023 |
| E5RG27     | Casein kinâ MASSSGSK   | 17 | 1  | 1    | 1  | 78   | 8.5   | 9.7  | 168.1    | 115.8    | 1.451641 |
| P02533     | Keratin, tyj MTTCSRQF  | 16 | 8  | 40   | 2  | 472  | 51.5  | 5.16 | 80       | 55.3     | 1.446655 |
| D3YTG3     | Target of N MRGGKCN    | 1  | 2  | 4    | 2  | 1777 | 195.2 | 9.73 | 221.3    | 153.2    | 1.444517 |
| P04066     | Tissue alph MRAPGMR    | 5  | 2  | 4    | 2  | 466  | 53.7  | 6.84 | 179.1    | 124.2    | 1.442029 |
| P10909     | Clusterin O MMKTLLLF   | 39 | 18 | 653  | 18 | 449  | 52.5  | 6.27 | 48175.9  | 33598.7  | 1.433862 |
| V9HW26     | ATP syntha MLSVRVAA    | 1  | 1  | 2    | 1  | 553  | 59.7  | 9.13 | 168.9    | 117.8    | 1.433786 |
| X6R8F3     | Neutrophil MPLGLLWL    | 14 | 2  | 6    | 2  | 200  | 22.8  | 8.5  | 377.1    | 264.9    | 1.423556 |
| P07996     | Thrombosç MGLAWGL      | 37 | 39 | 390  | 1  | 1170 | 129.3 | 4.94 | 559      | 392.8    | 1.423116 |
| P05164     | Myelopero MGVPFFSS     | 7  | 5  | 7    | 5  | 745  | 83.8  | 8.97 | 213.8    | 150.6    | 1.419655 |
| Q86U17     | Serpin A11 MGPAWLV     | 2  | 1  | 1    | 1  | 422  | 47    | 7.68 | 76.4     | 54       | 1.414815 |
| P07737     | Profilin-1 C MAGWNA\   | 27 | 3  | 12   | 3  | 140  | 15    | 8.27 | 350.2    | 247.6    | 1.414378 |
| Q9HCI6     | E3 SUMO-ı MGDPGSEI     | 1  | 1  | 6    | 1  | 787  | 89.6  | 7.74 | 350.2    | 247.6    | 1.414378 |
| P33908     | Mannosyl-ı MPVGGLLF    | 7  | 4  | 11   | 4  | 653  | 72.9  | 6.47 | 419.1    | 296.9    | 1.411586 |
| Q8NGE6     | Olfactory r MGDKGTG    | 6  | 1  | 16   | 1  | 254  | 28.1  | 7.91 | 1695.4   | 1201.7   | 1.410835 |
| A8KAJ3     | cDNA FLJ7 MLKALFTI     | 24 | 10 | 39   | 10 | 493  | 54.6  | 5.14 | 1889.4   | 1343.2   | 1.406641 |
| B2R9V7     | Superoxide MLALLCSCI   | 12 | 2  | 5    | 2  | 240  | 25.9  | 6.79 | 144.8    | 103      | 1.405825 |
| A0A068LR\  | Ig heavy ch QVTLRESGI  | 6  | 1  | 4    | 1  | 127  | 14    | 8.15 | 147      | 104.6    | 1.405354 |
| Q0ZCH6     | Immunglobı LVQLVESG    | 7  | 1  | 1    | 1  | 131  | 14.3  | 6.55 | 100      | 71.2     | 1.404494 |

|           |              |            |    |    |     |    |      |       |      |        |        |          |
|-----------|--------------|------------|----|----|-----|----|------|-------|------|--------|--------|----------|
| A0N5G5    | Rheumatoi    | EIVLTQSPA  | 23 | 2  | 9   | 2  | 118  | 12.8  | 8.97 | 132.6  | 94.5   | 1.403175 |
| A8K486    | Peptidyl-pr  | MVNPTVFF   | 5  | 1  | 1   | 1  | 165  | 18    | 6.9  | 13.1   | 9.5    | 1.378947 |
| Q16853    | Membrane     | MNQKTILV   | 9  | 5  | 9   | 5  | 763  | 84.6  | 6.52 | 137.7  | 99.9   | 1.378378 |
| A0A161I20 | Lactoferrin  | MKLVFLVLI  | 25 | 14 | 36  | 14 | 711  | 78.3  | 8.18 | 1211.5 | 879.4  | 1.377644 |
| P98160    | Basement     | MGWRAAC    | 1  | 2  | 3   | 2  | 4391 | 468.5 | 6.51 | 126.6  | 91.9   | 1.377584 |
| B2R773    | cDNA, FLJ9   | MLLLGAVL   | 12 | 2  | 6   | 2  | 244  | 26.4  | 5.74 | 751.6  | 546.2  | 1.376053 |
| Q9H8L6    | Multimerir   | MILSLLFSLC | 2  | 2  | 3   | 2  | 949  | 104.3 | 5.86 | 220    | 160.8  | 1.368159 |
| Q76LX8    | A disintegr  | MHQRHPR    | 4  | 5  | 9   | 5  | 1427 | 153.5 | 7.17 | 425.6  | 311.2  | 1.367609 |
| Q8NF17    | FLJ00385 p   | LWLWGRE'   | 23 | 10 | 100 | 2  | 509  | 56.1  | 7.59 | 331.5  | 242.4  | 1.367574 |
| O94818    | Nucleolar    | MESEKDM'   | 3  | 1  | 1   | 1  | 638  | 71.3  | 5.62 | 83     | 60.9   | 1.36289  |
| P23470    | Receptor-t   | MRRLLLEPC' | 4  | 4  | 5   | 4  | 1445 | 161.9 | 6.42 | 201.5  | 147.9  | 1.362407 |
| P21333    | Filamin-A    | C MSSSHSRA | 2  | 4  | 8   | 4  | 2647 | 280.6 | 6.06 | 168.1  | 123.6  | 1.360032 |
| Q13740    | CD166 anti   | MESKGASS   | 2  | 1  | 1   | 1  | 583  | 65.1  | 6.25 | 54.1   | 39.8   | 1.359296 |
| Q8WZ75    | Roundabot    | MGSGGDSI   | 2  | 1  | 3   | 1  | 1007 | 107.4 | 6.64 | 207.2  | 152.6  | 1.357798 |
| P18065    | Insulin-like | MLPRVGCF   | 22 | 5  | 11  | 5  | 325  | 34.8  | 7.5  | 408.5  | 301.5  | 1.354892 |
| Q8NBP7    | Proprotein   | MGTVSSRR   | 5  | 3  | 4   | 3  | 692  | 74.2  | 6.61 | 186.7  | 138.5  | 1.348014 |
| P03950    | Angiogenir   | MVMGLGV    | 18 | 2  | 3   | 2  | 147  | 16.5  | 9.64 | 489.1  | 363.2  | 1.346641 |
| P35908    | Keratin, tyj | MSCQISCK'  | 19 | 10 | 39  | 5  | 639  | 65.4  | 8    | 943.1  | 701.5  | 1.344405 |
| A0A024R1  | Contactin    | 1 MKMWLLV  | 1  | 1  | 2   | 1  | 1018 | 113.2 | 5.9  | 56.2   | 41.9   | 1.341289 |
| Q9Y5Z9    | UbiA preny   | MAASQVLC   | 3  | 1  | 1   | 1  | 338  | 36.8  | 8.15 | 109.1  | 81.4   | 1.340295 |
| Q96S96    | Phosphatic   | MGWTMRI    | 4  | 1  | 2   | 1  | 227  | 25.7  | 6.54 | 43.1   | 32.3   | 1.334365 |
| B4DQY7    | cDNA FLJ5:   | MSWFNAS    | 1  | 1  | 1   | 1  | 992  | 111.7 | 4.87 | 20.8   | 15.6   | 1.333333 |
| Q86VB7    | Scavenger    | MSKLRMVI   | 5  | 4  | 7   | 4  | 1156 | 125.4 | 5.95 | 222.9  | 167.3  | 1.332337 |
| A0A024QZ  | Proteoglyc   | MMQKLLKI   | 8  | 1  | 2   | 1  | 158  | 17.6  | 4.86 | 176.4  | 132.4  | 1.332326 |
| J3KNB4    | Cathelicidi  | MGTMKTQ    | 5  | 1  | 1   | 1  | 173  | 19.6  | 9.41 | 421    | 316.2  | 1.331436 |
| Q96RZ2    | N-acetylgl   | MAAGLARI   | 3  | 1  | 1   | 1  | 331  | 36.8  | 6.79 | 59.8   | 45     | 1.328889 |
| P07359    | Platelet gly | MPLLLLLLL  | 12 | 6  | 55  | 6  | 652  | 71.5  | 6.29 | 2770   | 2084.5 | 1.328856 |
| Q07954    | Prolow-der   | MLTPPLLLL  | 1  | 2  | 4   | 2  | 4544 | 504.3 | 5.39 | 29.5   | 22.3   | 1.32287  |
| P40197    | Platelet gly | MLRGTLCC   | 18 | 8  | 31  | 8  | 560  | 60.9  | 9.63 | 1166.6 | 882    | 1.322676 |
| A0A087X1  | Calcium-de   | MLDPSSSEI  | 1  | 1  | 49  | 1  | 1301 | 148.2 | 6.05 | 391.4  | 298    | 1.313423 |
| A6NC48    | ADP-ribosy   | MAAQGCA    | 7  | 2  | 5   | 2  | 333  | 37.5  | 7.97 | 310.2  | 236.2  | 1.313294 |
| B2R6V9    | cDNA, FLJ9   | MSETSRTA   | 2  | 1  | 1   | 1  | 732  | 83.2  | 6    | 69.2   | 52.7   | 1.313093 |
| P35527    | Keratin, tyj | MSCRQFSS   | 13 | 8  | 64  | 7  | 623  | 62    | 5.24 | 4681.3 | 3567.9 | 1.31206  |

|          |             |           |    |    |      |   |     |      |      |        |         |          |
|----------|-------------|-----------|----|----|------|---|-----|------|------|--------|---------|----------|
| Q9UL89   | Myosin-rez  | VQSGAEVK  | 10 | 1  | 2    | 1 | 116 | 12.6 | 9.1  | 98.2   | 74.9    | 1.311081 |
| A0A024RD | SPARC-like  | MKTGLFFLI | 2  | 1  | 3    | 1 | 664 | 75.2 | 4.81 | 88.3   | 67.4    | 1.310089 |
| R4GMU1   | GDH/6PGL    | MLAEPFNV  | 1  | 1  | 2    | 1 | 802 | 90.1 | 7.23 | 62.3   | 47.6    | 1.308824 |
| Q6EMK4   | Vasorin OS  | MCSRVPLL  | 6  | 3  | 13   | 3 | 673 | 71.7 | 7.39 | 474.9  | 363.3   | 1.307184 |
| D6RF20   | Vitamin D-  | MKRVLVLL  | 76 | 10 | 581  | 1 | 145 | 16.1 | 5.83 | 31.5   | 24.1    | 1.307054 |
| A8K6C1   | cDNA FLJ7f  | MLAATVLT  | 5  | 2  | 5    | 2 | 493 | 54.7 | 6.09 | 887    | 679.2   | 1.305948 |
| P11279   | Lysosome-   | MAAPGSAI  | 4  | 2  | 3    | 2 | 417 | 44.9 | 8.75 | 311.7  | 238.8   | 1.305276 |
| Q4TZM4   | Hemoglobi   | TPEEKSAVT | 89 | 9  | 235  | 2 | 101 | 11   | 6.52 | 979.5  | 1332.1  | 0.735305 |
| V9HWI6   | Epididymis  | MKRVLVLL  | 66 | 32 | 2121 | 2 | 474 | 52.9 | 5.54 | 1355.4 | 1938.8  | 0.699092 |
| A0A1K0GX | Globin C1 ( | MSAARPG\  | 51 | 7  | 179  | 7 | 177 | 19.2 | 9.77 | 9465.6 | 14723.1 | 0.642908 |
| Q7Z7Q0   | APOB prot   | MDPPRPAL  | 58 | 50 | 3404 | 1 | 825 | 92.3 | 7.42 | 176    | 369.3   | 0.476577 |



| Uniprot<br>Accession<br>Number | Protein<br>amino acid<br>sequence | Protein<br>amino acid<br>sequence<br>degree(%) | The<br>number of<br>peptides<br>identified | The total<br>number of<br>times a<br>polypepti<br>de was<br>identified | The<br>number of<br>characteri<br>peptides<br>identified | Amino<br>acid length | KDa   | isoelectric<br>point | relative<br>abundanc<br>e of<br>normalize<br>d protein -<br>control |               |                |
|--------------------------------|-----------------------------------|------------------------------------------------|--------------------------------------------|------------------------------------------------------------------------|----------------------------------------------------------|----------------------|-------|----------------------|---------------------------------------------------------------------|---------------|----------------|
|                                |                                   |                                                |                                            |                                                                        |                                                          |                      |       |                      | sample<br>116                                                       | sample<br>121 | ratio(116/121) |
| A0A0R4J2F                      | Spermatog MPRAQLLE                | 1                                              | 1                                          | 2                                                                      | 1                                                        | 1361                 | 150   | 8.81                 | 70.6                                                                | 22.3          | 3.165919       |
| B2R4R0                         | Histone H4 MSGRGKG                | 17                                             | 2                                          | 10                                                                     | 2                                                        | 103                  | 11.4  | 11.36                | 753.8                                                               | 266.4         | 2.82958        |
| G9K388                         | YWHAE/FA RADPAGAA                 | 5                                              | 2                                          | 5                                                                      | 2                                                        | 384                  | 41.2  | 4.97                 | 384.3                                                               | 139.1         | 2.762761       |
| B2RDG0                         | Proteasom MSRRYDSR                | 3                                              | 1                                          | 2                                                                      | 1                                                        | 261                  | 29.4  | 7.72                 | 166.8                                                               | 67.9          | 2.456554       |
| Q8TCZ8                         | Apolipoprc RLGADMEI               | 54                                             | 3                                          | 161                                                                    | 1                                                        | 57                   | 6.7   | 9.98                 | 890                                                                 | 380.9         | 2.336571       |
| Q9BWP8                         | Collectin-1 MRGNLAL               | 6                                              | 2                                          | 2                                                                      | 2                                                        | 271                  | 28.6  | 5.41                 | 40.5                                                                | 18.3          | 2.213115       |
| Q05639                         | Elongation MGKEKTHI               | 2                                              | 1                                          | 2                                                                      | 1                                                        | 463                  | 50.4  | 9.03                 | 85.3                                                                | 40.3          | 2.116625       |
| Q96AN5                         | Transmem MTVELWLF                 | 3                                              | 1                                          | 4                                                                      | 1                                                        | 459                  | 51.7  | 9.67                 | 179.8                                                               | 90            | 1.997778       |
| D6W5K2                         | Thymosin, GVSSRFPEF               | 4                                              | 1                                          | 1                                                                      | 1                                                        | 169                  | 17.9  | 10.48                | 169.2                                                               | 88            | 1.922727       |
| J3KMX3                         | Alpha-feto MKWVESIF               | 1                                              | 1                                          | 3                                                                      | 1                                                        | 622                  | 70.4  | 5.55                 | 117.6                                                               | 61.9          | 1.899838       |
| V9HW31                         | ATP synth MLGFVGR                 | 4                                              | 2                                          | 4                                                                      | 2                                                        | 529                  | 56.5  | 5.4                  | 152                                                                 | 83.6          | 1.818182       |
| Q9HCI6                         | E3 SUMO- $\gamma$ MGDPGSEI        | 1                                              | 1                                          | 6                                                                      | 1                                                        | 787                  | 89.6  | 7.74                 | 420.3                                                               | 247.6         | 1.697496       |
| A0A024RD                       | SPARC-like MKTGLFFLI              | 2                                              | 1                                          | 3                                                                      | 1                                                        | 664                  | 75.2  | 4.81                 | 113.9                                                               | 67.4          | 1.689911       |
| V9HVV1                         | Epididymis MKRMVSM                | 2                                              | 1                                          | 1                                                                      | 1                                                        | 491                  | 55.9  | 8.27                 | 85.8                                                                | 51.6          | 1.662791       |
| P35908                         | Keratin, ty MSCQISCK              | 19                                             | 10                                         | 39                                                                     | 5                                                        | 639                  | 65.4  | 8                    | 1154.5                                                              | 701.5         | 1.645759       |
| Q8NGE6                         | Olfactory r MGDKGTG               | 6                                              | 1                                          | 16                                                                     | 1                                                        | 254                  | 28.1  | 7.91                 | 1970.5                                                              | 1201.7        | 1.63976        |
| Q9H628                         | Ras-relatec MSNFLHLK              | 4                                              | 1                                          | 3                                                                      | 1                                                        | 205                  | 23.8  | 9.51                 | 317.1                                                               | 196           | 1.617857       |
| Q59EA3                         | Cadherin 5 TDRQSNGT               | 7                                              | 5                                          | 13                                                                     | 5                                                        | 807                  | 89.9  | 5.48                 | 503.1                                                               | 314           | 1.602229       |
| A8K486                         | Peptidyl-pr MVNPTVFF              | 5                                              | 1                                          | 1                                                                      | 1                                                        | 165                  | 18    | 6.9                  | 15.1                                                                | 9.5           | 1.589474       |
| P67936                         | Tropomyo MAGLNSLE                 | 8                                              | 2                                          | 4                                                                      | 2                                                        | 248                  | 28.5  | 4.69                 | 517.2                                                               | 328.1         | 1.576349       |
| Q66K66                         | Transmem MPGTVATL                 | 3                                              | 1                                          | 5                                                                      | 1                                                        | 360                  | 39.4  | 9.92                 | 821.1                                                               | 522.4         | 1.571784       |
| E2RVJ0                         | Anion exch MEELQDD                | 3                                              | 2                                          | 4                                                                      | 2                                                        | 912                  | 101.9 | 5.22                 | 36.3                                                                | 23.2          | 1.564655       |
| A0A068LR                       | Ig heavy ch QVTLRESGI             | 6                                              | 1                                          | 4                                                                      | 1                                                        | 127                  | 14    | 8.15                 | 163.1                                                               | 104.6         | 1.559273       |
| Q9ULV0                         | Unconvent MSVGELYS                | 0                                              | 2                                          | 8                                                                      | 2                                                        | 1848                 | 213.5 | 7.2                  | 82.8                                                                | 53.7          | 1.541899       |
| J3KPS3                         | Fructose-b MPYQYPAL               | 8                                              | 2                                          | 2                                                                      | 2                                                        | 368                  | 39.8  | 8.09                 | 205.3                                                               | 133.9         | 1.533234       |

|           |                                  |    |    |      |    |      |       |      |          |          |          |
|-----------|----------------------------------|----|----|------|----|------|-------|------|----------|----------|----------|
| A8K430    | Fructose-b MAHRFPAL              | 21 | 5  | 9    | 5  | 364  | 39.4  | 8.21 | 169.2    | 111.1    | 1.522952 |
| A8K9X5    | cDNA FLJ71 MASNMDR               | 2  | 1  | 10   | 1  | 650  | 73.9  | 4.88 | 1951.7   | 1282.7   | 1.521556 |
| P37802    | Transgelin- MANRGPA              | 30 | 5  | 14   | 5  | 199  | 22.4  | 8.25 | 676.2    | 445.5    | 1.517845 |
| Q59ED3    | Intercellulæ LIVTCSLQQ           | 4  | 1  | 2    | 1  | 344  | 38.4  | 7.78 | 102.8    | 68.1     | 1.509545 |
| P00738    | Haptoglobi MSALGAVL              | 57 | 27 | 2184 | 12 | 406  | 45.2  | 6.58 | 279577.3 | 185933.7 | 1.50364  |
| A0A024R4I | Fibronectin MLRGPGPC             | 22 | 43 | 227  | 43 | 2355 | 259   | 5.73 | 13008.3  | 8653     | 1.503328 |
| E5RG27    | Casein kinase MASSSGSK           | 17 | 1  | 1    | 1  | 78   | 8.5   | 9.7  | 173.4    | 115.8    | 1.497409 |
| A0A024QZ  | Serine/threonine MELLRTITY       | 2  | 1  | 3    | 1  | 685  | 78.2  | 8.24 | 538.4    | 359.7    | 1.496803 |
| P02741    | C-reactive protein MEKLLCFLV     | 24 | 6  | 38   | 6  | 224  | 25    | 5.63 | 1604.3   | 1082.9   | 1.481485 |
| Q16853    | Membrane protein MNQKTILV        | 9  | 5  | 9    | 5  | 763  | 84.6  | 6.52 | 148      | 99.9     | 1.481481 |
| H6VRG1    | Keratin 1 C MSRQFSSR             | 26 | 15 | 79   | 13 | 645  | 66.1  | 8.12 | 3184.2   | 2159.3   | 1.474645 |
| A8K3K1    | cDNA FLJ71 MCDDEETT              | 31 | 9  | 48   | 2  | 377  | 42    | 5.39 | 91.6     | 62.2     | 1.472669 |
| Q8WZ75    | Roundabout MGSGGDSI              | 2  | 1  | 3    | 1  | 1007 | 107.4 | 6.64 | 220.8    | 152.6    | 1.44692  |
| V9HW26    | ATP synthase MLSVRVAA            | 1  | 1  | 2    | 1  | 553  | 59.7  | 9.13 | 169.9    | 117.8    | 1.442275 |
| P10909    | Clusterin O MMKTLLEF             | 39 | 18 | 653  | 18 | 449  | 52.5  | 6.27 | 48440.7  | 33598.7  | 1.441743 |
| P98160    | Basement membrane MGWRAAC        | 1  | 2  | 3    | 2  | 4391 | 468.5 | 6.51 | 132.4    | 91.9     | 1.440696 |
| Q8WWZ8    | Oncoprotein MPPFLLLC             | 2  | 1  | 1    | 1  | 545  | 60    | 5.58 | 76.5     | 53.5     | 1.429907 |
| P03950    | Angiogenic factor MVMGLGV        | 18 | 2  | 3    | 2  | 147  | 16.5  | 9.64 | 518.6    | 363.2    | 1.427863 |
| Q9H804    | cDNA FLJ12 MPGPRVW               | 21 | 7  | 38   | 1  | 438  | 48    | 7.46 | 222.8    | 156.4    | 1.424552 |
| B7ZMD7    | Alpha-amylase MKLFWLLF           | 3  | 1  | 1    | 1  | 511  | 57.7  | 6.93 | 50.1     | 35.3     | 1.419263 |
| P33908    | Mannosyl-binding MPVGGLLF        | 7  | 4  | 11   | 4  | 653  | 72.9  | 6.47 | 421.2    | 296.9    | 1.418659 |
| A0A1C9J6F | B cell receptor EVQLVQSG         | 14 | 1  | 2    | 1  | 132  | 14.6  | 8.02 | 87.2     | 61.6     | 1.415584 |
| P02533    | Keratin, type I MTTCSRQF         | 16 | 8  | 40   | 2  | 472  | 51.5  | 5.16 | 78.1     | 55.3     | 1.412297 |
| Q86U17    | Serpin A11 MGPAWLV               | 2  | 1  | 1    | 1  | 422  | 47    | 7.68 | 76.2     | 54       | 1.411111 |
| A0A125U0  | GCT-A2 heavy chain EVQLVESG      | 15 | 1  | 1    | 1  | 126  | 13.8  | 5.45 | 26.6     | 18.9     | 1.407407 |
| P05164    | Myeloperoxidase MGVPFFSS         | 7  | 5  | 7    | 5  | 745  | 83.8  | 8.97 | 211.2    | 150.6    | 1.40239  |
| Q99969    | Retinoic acid receptor MRRLLIPLA | 7  | 1  | 2    | 1  | 163  | 18.6  | 9.09 | 56.8     | 40.7     | 1.395577 |
| Q0ZCH6    | Immunglobulin LVQLVESG           | 7  | 1  | 1    | 1  | 131  | 14.3  | 6.55 | 97.9     | 71.2     | 1.375    |
| P21333    | Filamin-A C MSSHRSRA             | 2  | 4  | 8    | 4  | 2647 | 280.6 | 6.06 | 169.7    | 123.6    | 1.372977 |
| Q9Y5Z9    | UbiA prenyltransferase MAASQVLC  | 3  | 1  | 1    | 1  | 338  | 36.8  | 8.15 | 111.7    | 81.4     | 1.372236 |
| P07333    | Macrophage MGPVLLL               | 3  | 2  | 3    | 2  | 972  | 107.9 | 6.37 | 44.6     | 32.6     | 1.368098 |
| B2R773    | cDNA, FLJ9 MLLLGAVL              | 12 | 2  | 6    | 2  | 244  | 26.4  | 5.74 | 746      | 546.2    | 1.3658   |
| X6R8F3    | Neutrophil MPLGLLWL              | 14 | 2  | 6    | 2  | 200  | 22.8  | 8.5  | 359.3    | 264.9    | 1.356361 |

|           |                       |    |    |      |    |      |       |      |         |         |          |
|-----------|-----------------------|----|----|------|----|------|-------|------|---------|---------|----------|
| P23470    | Receptor-t MRRLLEPC   | 4  | 4  | 5    | 4  | 1445 | 161.9 | 6.42 | 200.5   | 147.9   | 1.355646 |
| Q07954    | Prolow-dei MLTPPLLL   | 1  | 2  | 4    | 2  | 4544 | 504.3 | 5.39 | 30      | 22.3    | 1.345291 |
| Q6YHK3    | CD109 anti MQGPPLLT   | 1  | 1  | 1    | 1  | 1445 | 161.6 | 5.85 | 219.3   | 163.1   | 1.344574 |
| G3XAI2    | Laminin su MDCPLSAP   | 1  | 1  | 1    | 1  | 1810 | 200.3 | 4.96 | 133.7   | 99.6    | 1.342369 |
| P04066    | Tissue alph MRAPGMR   | 5  | 2  | 4    | 2  | 466  | 53.7  | 6.84 | 166.6   | 124.2   | 1.341385 |
| P06733    | Alpha-enol MSILKI HAR | 3  | 1  | 2    | 1  | 434  | 47.1  | 7.39 | 66.6    | 49.7    | 1.34004  |
| Q4LE64    | NUMA1 va LSGITKMTL    | 1  | 1  | 45   | 1  | 2121 | 238.7 | 5.81 | 1075    | 802.5   | 1.339564 |
| P07737    | Profilin-1 C MAGWNA\  | 27 | 3  | 12   | 3  | 140  | 15    | 8.27 | 331.5   | 247.6   | 1.338853 |
| P18065    | Insulin-like MLPRVGCF | 22 | 5  | 11   | 5  | 325  | 34.8  | 7.5  | 403.6   | 301.5   | 1.33864  |
| A6XNE2    | Compleme MHSWERL      | 39 | 7  | 65   | 7  | 260  | 27.8  | 7.25 | 4144.5  | 3098.3  | 1.337669 |
| B7Z9B1    | cDNA FLJ5: MKTPPGAS   | 2  | 1  | 4    | 1  | 760  | 83.4  | 5.12 | 245.4   | 183.5   | 1.33733  |
| O00151    | PDZ and LIIMTTQQIDL   | 3  | 1  | 1    | 1  | 329  | 36    | 7.02 | 104.3   | 78.2    | 1.33376  |
| P24592    | Insulin-like MTPHRLLP | 10 | 2  | 5    | 2  | 240  | 25.3  | 7.81 | 160     | 120.4   | 1.328904 |
| A8KAJ3    | cDNA FLJ7: MLKALFLT   | 24 | 10 | 39   | 10 | 493  | 54.6  | 5.14 | 1779.4  | 1343.2  | 1.324747 |
| A0N5G5    | Rheumatoi EIVLTQSPA   | 23 | 2  | 9    | 2  | 118  | 12.8  | 8.97 | 124.5   | 94.5    | 1.31746  |
| Q6UY14    | ADAMTS-li MENWTGR     | 2  | 1  | 1    | 1  | 1074 | 116.5 | 8.34 | 56.2    | 42.9    | 1.310023 |
| P08709    | Coagulatio MVSQALRL   | 14 | 4  | 14   | 4  | 466  | 51.6  | 7.23 | 429.3   | 328     | 1.308841 |
| A8K6C1    | cDNA FLJ7: MLAATVLT   | 5  | 2  | 5    | 2  | 493  | 54.7  | 6.09 | 885.6   | 679.2   | 1.303887 |
| A0A161120 | Lactoferrin MKLVFLVLI | 25 | 14 | 36   | 14 | 711  | 78.3  | 8.18 | 1145.7  | 879.4   | 1.30282  |
| A2J1N5    | Rheumatoi VESGGGVV    | 23 | 2  | 5    | 1  | 94   | 10.4  | 9.13 | 147     | 112.9   | 1.302037 |
| A2NYQ9    | Anti-folate QVQLVESG  | 32 | 3  | 16   | 1  | 120  | 13.3  | 8.44 | 41.3    | 53.9    | 0.766234 |
| A0A1B0GU  | Ig mu chair GSASAPTLF | 38 | 16 | 591  | 3  | 474  | 51.9  | 6.15 | 31512.1 | 41758.8 | 0.754622 |
| Q92833    | Protein Jur MSKERPKR  | 1  | 1  | 7    | 1  | 1246 | 138.6 | 9.38 | 447.8   | 606.3   | 0.738578 |
| Q8TCD0    | Uncharact: MRLPAQLL   | 41 | 6  | 154  | 1  | 239  | 26.2  | 8.06 | 341.9   | 466.9   | 0.732277 |
| V9GYM3    | Apolipoprc MCEQHPKI   | 32 | 6  | 446  | 6  | 133  | 14.9  | 8.27 | 40529.6 | 58257.6 | 0.695696 |
| Q96JG6    | Syndetin O MQKIKSLM   | 1  | 1  | 4    | 1  | 964  | 111.1 | 6.2  | 172.5   | 264.9   | 0.651189 |
| Q8IXL6    | Extracellul: MKMMLVF  | 3  | 1  | 1    | 1  | 584  | 66.2  | 7.74 | 78.9    | 121.2   | 0.65099  |
| E9KL23    | Epididymis MPSSVSWC   | 61 | 31 | 1738 | 1  | 418  | 46.7  | 5.59 | 4010.7  | 6306.2  | 0.635993 |

| Uniprot<br>Accession<br>Number | Protein<br>name | Protein<br>amino acid<br>sequence | Protein<br>amino acid<br>sequence<br>degree(%) | The<br>number of<br>peptides<br>identified | The<br>total<br>number of<br>times a<br>polypepti<br>de was<br>identified | The<br>number of<br>characteri<br>peptides<br>identified | Amino<br>acid length<br>KDa | isoelectric<br>point | relative<br>abundanc<br>e of<br>normalize<br>d protein -<br>sample<br>117 | relative<br>abundanc<br>e of<br>normalize<br>d protein -<br>sample<br>121 | relative<br>abundanc<br>e of<br>normalize<br>d protein -<br>control<br>sample | ratio(117/121) |
|--------------------------------|-----------------|-----------------------------------|------------------------------------------------|--------------------------------------------|---------------------------------------------------------------------------|----------------------------------------------------------|-----------------------------|----------------------|---------------------------------------------------------------------------|---------------------------------------------------------------------------|-------------------------------------------------------------------------------|----------------|
|                                |                 |                                   |                                                |                                            |                                                                           |                                                          |                             |                      |                                                                           |                                                                           |                                                                               |                |
| Q05639                         | Elongation      | MGKEKTHI                          | 2                                              | 1                                          | 2                                                                         | 1                                                        | 463                         | 50.4                 | 9.03                                                                      | 136.9                                                                     | 40.3                                                                          | 3.397022       |
| A0A0R4J2F                      | Spermatog       | MPRAQLLE                          | 1                                              | 1                                          | 2                                                                         | 1                                                        | 1361                        | 150                  | 8.81                                                                      | 68.9                                                                      | 22.3                                                                          | 3.089686       |
| B2R4R0                         | Histone H4      | MSGRGKGI                          | 17                                             | 2                                          | 10                                                                        | 2                                                        | 103                         | 11.4                 | 11.36                                                                     | 704.1                                                                     | 266.4                                                                         | 2.643018       |
| D6W5K2                         | Thymosin,       | GVSSRFPEF                         | 4                                              | 1                                          | 1                                                                         | 1                                                        | 169                         | 17.9                 | 10.48                                                                     | 204.7                                                                     | 88                                                                            | 2.326136       |
| G9K388                         | YWHAE/FA        | RADPAGAA                          | 5                                              | 2                                          | 5                                                                         | 2                                                        | 384                         | 41.2                 | 4.97                                                                      | 322.6                                                                     | 139.1                                                                         | 2.319195       |
| Q9BWP8                         | Collectin-1     | MRGNLALV                          | 6                                              | 2                                          | 2                                                                         | 2                                                        | 271                         | 28.6                 | 5.41                                                                      | 40.3                                                                      | 18.3                                                                          | 2.202186       |
| A0A024R4I                      | Fibronectin     | MLRGPGPC                          | 22                                             | 43                                         | 227                                                                       | 43                                                       | 2355                        | 259                  | 5.73                                                                      | 18122.1                                                                   | 8653                                                                          | 2.094314       |
| B2RDG0                         | Proteasom       | MSRRYDSR                          | 3                                              | 1                                          | 2                                                                         | 1                                                        | 261                         | 29.4                 | 7.72                                                                      | 127.9                                                                     | 67.9                                                                          | 1.883652       |
| P35908                         | Keratin, ty     | MSCQISCKI                         | 19                                             | 10                                         | 39                                                                        | 5                                                        | 639                         | 65.4                 | 8                                                                         | 1302.1                                                                    | 701.5                                                                         | 1.856165       |
| J3KMX3                         | Alpha-feto      | MKWVESIF                          | 1                                              | 1                                          | 3                                                                         | 1                                                        | 622                         | 70.4                 | 5.55                                                                      | 104.8                                                                     | 61.9                                                                          | 1.693053       |
| V9HW31                         | ATP syntha      | MLGFVGRV                          | 4                                              | 2                                          | 4                                                                         | 2                                                        | 529                         | 56.5                 | 5.4                                                                       | 138.6                                                                     | 83.6                                                                          | 1.657895       |
| H6VRG1                         | Keratin 1 C     | MSRQFSSR                          | 26                                             | 15                                         | 79                                                                        | 13                                                       | 645                         | 66.1                 | 8.12                                                                      | 3565.9                                                                    | 2159.3                                                                        | 1.651415       |
| P05164                         | Myeloper        | MGVPPFSS                          | 7                                              | 5                                          | 7                                                                         | 5                                                        | 745                         | 83.8                 | 8.97                                                                      | 238.4                                                                     | 150.6                                                                         | 1.583001       |
| Q59EA3                         | Cadherin 5      | TDRQSNGT                          | 7                                              | 5                                          | 13                                                                        | 5                                                        | 807                         | 89.9                 | 5.48                                                                      | 496.3                                                                     | 314                                                                           | 1.580573       |
| P07996                         | Thrombos        | MGLAWGL                           | 37                                             | 39                                         | 390                                                                       | 1                                                        | 1170                        | 129.3                | 4.94                                                                      | 606.6                                                                     | 392.8                                                                         | 1.544297       |
| Q9HCI6                         | E3 SUMO-1       | MGDPGSEI                          | 1                                              | 1                                          | 6                                                                         | 1                                                        | 787                         | 89.6                 | 7.74                                                                      | 379.6                                                                     | 247.6                                                                         | 1.533118       |
| Q96AN5                         | Transmem        | MTVELWLF                          | 3                                              | 1                                          | 4                                                                         | 1                                                        | 459                         | 51.7                 | 9.67                                                                      | 136.5                                                                     | 90                                                                            | 1.516667       |
| P37802                         | Transgelin      | MANRGPAI                          | 30                                             | 5                                          | 14                                                                        | 5                                                        | 199                         | 22.4                 | 8.25                                                                      | 673.6                                                                     | 445.5                                                                         | 1.512009       |
| P98160                         | Basement        | MGWRAAC                           | 1                                              | 2                                          | 3                                                                         | 2                                                        | 4391                        | 468.5                | 6.51                                                                      | 138.4                                                                     | 91.9                                                                          | 1.505985       |
| Q8TCZ8                         | Apolipop        | RLGADMEI                          | 54                                             | 3                                          | 161                                                                       | 1                                                        | 57                          | 6.7                  | 9.98                                                                      | 571.4                                                                     | 380.9                                                                         | 1.500131       |
| A8K9X5                         | cDNA FLJ7       | MASNMDR                           | 2                                              | 1                                          | 10                                                                        | 1                                                        | 650                         | 73.9                 | 4.88                                                                      | 1903.3                                                                    | 1282.7                                                                        | 1.483823       |
| Q86U17                         | Serpin A11      | MGPALV                            | 2                                              | 1                                          | 1                                                                         | 1                                                        | 422                         | 47                   | 7.68                                                                      | 78.9                                                                      | 54                                                                            | 1.461111       |
| V9HWI6                         | Epididymis      | MKRVLVLL                          | 66                                             | 32                                         | 2121                                                                      | 2                                                        | 474                         | 52.9                 | 5.54                                                                      | 2818.7                                                                    | 1938.8                                                                        | 1.453837       |
| P07737                         | Profilin-1 C    | MAGWNAI                           | 27                                             | 3                                          | 12                                                                        | 3                                                        | 140                         | 15                   | 8.27                                                                      | 356.3                                                                     | 247.6                                                                         | 1.439015       |
| B1AHL2                         | Fibulin-1 O     | MERAAPSF                          | 7                                              | 4                                          | 8                                                                         | 4                                                        | 721                         | 78.3                 | 5.39                                                                      | 261.5                                                                     | 181.8                                                                         | 1.438394       |

|            |                        |    |    |     |    |      |       |      |         |         |          |
|------------|------------------------|----|----|-----|----|------|-------|------|---------|---------|----------|
| E2RVJ0     | Anion exch MEELQDD\    | 3  | 2  | 4   | 2  | 912  | 101.9 | 5.22 | 32.8    | 23.2    | 1.413793 |
| P06733     | Alpha-enol MSILKIHAR   | 3  | 1  | 2   | 1  | 434  | 47.1  | 7.39 | 70      | 49.7    | 1.408451 |
| P13645     | Keratin, tyj MSVRYSSSI | 19 | 12 | 89  | 9  | 584  | 58.8  | 5.21 | 5879.9  | 4187.6  | 1.404122 |
| P10909     | Clusterin O MMKTLFFF   | 39 | 18 | 653 | 18 | 449  | 52.5  | 6.27 | 47018.7 | 33598.7 | 1.39942  |
| A0A1C9J6FB | cell recep EVQLVQSG    | 14 | 1  | 2   | 1  | 132  | 14.6  | 8.02 | 86.2    | 61.6    | 1.399351 |
| P67936     | Tropomyo: MAGLNSLE     | 8  | 2  | 4   | 2  | 248  | 28.5  | 4.69 | 458.3   | 328.1   | 1.39683  |
| Q4LE64     | NUMA1 va LSGITKMTL     | 1  | 1  | 45  | 1  | 2121 | 238.7 | 5.81 | 1117.1  | 802.5   | 1.392025 |
| V9HW26     | ATP syntha MLSVRVAA    | 1  | 1  | 2   | 1  | 553  | 59.7  | 9.13 | 162.5   | 117.8   | 1.379457 |
| A8K486     | Peptidyl-pr MVNPTVFF   | 5  | 1  | 1   | 1  | 165  | 18    | 6.9  | 13.1    | 9.5     | 1.378947 |
| Q9Y5Z9     | UbiA preny MAASQVLC    | 3  | 1  | 1   | 1  | 338  | 36.8  | 8.15 | 112     | 81.4    | 1.375921 |
| P49746     | Thrombos METQELRC      | 3  | 3  | 17  | 2  | 956  | 104.1 | 4.65 | 854.1   | 626.2   | 1.363941 |
| A0A024RC1  | Peroxisom MEQPQEE/     | 2  | 1  | 5   | 1  | 441  | 49.9  | 7.59 | 603.2   | 446.8   | 1.350045 |
| E7EQ64     | Trypsin-1 C MNPLLILTF  | 11 | 2  | 20  | 2  | 261  | 28.1  | 7.25 | 442.1   | 329.5   | 1.34173  |
| A8KAJ3     | cDNA FLJ7: MLKALFTI    | 24 | 10 | 39  | 10 | 493  | 54.6  | 5.14 | 1797    | 1343.2  | 1.33785  |
| Q6EMK4     | Vasorin OS MCSRVPPL    | 6  | 3  | 13  | 3  | 673  | 71.7  | 7.39 | 485.5   | 363.3   | 1.336361 |
| X6R8F3     | Neutrophil MPLGLLWI    | 14 | 2  | 6   | 2  | 200  | 22.8  | 8.5  | 354     | 264.9   | 1.336353 |
| P02533     | Keratin, tyj MTTCSRQF  | 16 | 8  | 40  | 2  | 472  | 51.5  | 5.16 | 73.8    | 55.3    | 1.334539 |
| Q8NBP7     | Proprotein MGTVSSRR    | 5  | 3  | 4   | 3  | 692  | 74.2  | 6.61 | 184.5   | 138.5   | 1.33213  |
| B2R6V9     | cDNA, FLJ9 MSETSRTA    | 2  | 1  | 1   | 1  | 732  | 83.2  | 6    | 69.9    | 52.7    | 1.326376 |
| P00918     | Carbonic a: MSHHWGY    | 12 | 3  | 5   | 3  | 260  | 29.2  | 7.4  | 162.7   | 122.8   | 1.324919 |
| Q8IY21     | Probable A MERNVLTT    | 1  | 1  | 12  | 1  | 1712 | 197.7 | 7.59 | 1047.1  | 795     | 1.317107 |
| E5RG27     | Casein kinz MASSSGSK   | 17 | 1  | 1   | 1  | 78   | 8.5   | 9.7  | 152.4   | 115.8   | 1.316062 |
| Q8NGE6     | Olfactory r MGDKGTG    | 6  | 1  | 16  | 1  | 254  | 28.1  | 7.91 | 1579.6  | 1201.7  | 1.314471 |
| P07359     | Platelet gly MPLLLLLL  | 12 | 6  | 55  | 6  | 652  | 71.5  | 6.29 | 2718.9  | 2084.5  | 1.304342 |
| P03950     | Angiogenir MVMGLGV     | 18 | 2  | 3   | 2  | 147  | 16.5  | 9.64 | 472.9   | 363.2   | 1.302037 |
| A0A068LL6  | Ig heavy ch QVQLVQSC   | 19 | 2  | 16  | 1  | 120  | 13.3  | 7.93 | 77.1    | 59.3    | 1.300169 |
| B3KSS6     | Phosphodi: MESPTKEIE   | 1  | 1  | 3   | 1  | 709  | 80.7  | 8.82 | 295.2   | 385.6   | 0.76556  |
| A0A1K0GX   | Globin C1 ( MSAARPG\   | 51 | 7  | 179 | 7  | 177  | 19.2  | 9.77 | 10905.9 | 14723.1 | 0.740734 |
| Q4TZM4     | Hemoglobi TPEEKSAVT    | 89 | 9  | 235 | 2  | 101  | 11    | 6.52 | 935.1   | 1332.1  | 0.701974 |
| A0A1B1CY1  | Vitamin D I LAERLKAKL  | 38 | 2  | 104 | 2  | 34   | 3.7   | 8.56 | 7147.6  | 10424.2 | 0.685674 |
| Q9H804     | cDNA FLJ1: MPGPRVW     | 21 | 7  | 38  | 1  | 438  | 48    | 7.46 | 105.8   | 156.4   | 0.676471 |

| Uniprot<br>Accession<br>Number | Protein<br>amino<br>acid<br>sequence | Protein<br>amino acid<br>sequence<br>matching<br>degree(%) | The<br>number of<br>peptides<br>identified | The total<br>number of<br>times a<br>polypepti<br>de was<br>identified | The<br>number of<br>characteri<br>peptides<br>identified | Amino<br>acid length | KDa   | isoelectric<br>point | relative<br>abundanc<br>e of<br>normalize<br>d protein -<br>control |               |                |
|--------------------------------|--------------------------------------|------------------------------------------------------------|--------------------------------------------|------------------------------------------------------------------------|----------------------------------------------------------|----------------------|-------|----------------------|---------------------------------------------------------------------|---------------|----------------|
|                                |                                      |                                                            |                                            |                                                                        |                                                          |                      |       |                      | sample<br>118                                                       | sample<br>121 | ratio(118/121) |
| D6W5K2                         | Thymosin, GVSSRFPEF                  | 4                                                          | 1                                          | 1                                                                      | 1                                                        | 169                  | 17.9  | 10.48                | 181.3                                                               | 88            | 2.060227       |
| E2RVJ0                         | Anion exch MEELQDD\                  | 3                                                          | 2                                          | 4                                                                      | 2                                                        | 912                  | 101.9 | 5.22                 | 41.9                                                                | 23.2          | 1.806034       |
| P98160                         | Basement  MGWRAAC                    | 1                                                          | 2                                          | 3                                                                      | 2                                                        | 4391                 | 468.5 | 6.51                 | 159.1                                                               | 91.9          | 1.73123        |
| A0A068B0'                      | Cis-AB glyc MAEVLRTL                 | 5                                                          | 1                                          | 1                                                                      | 1                                                        | 354                  | 40.8  | 8.87                 | 124.2                                                               | 74.1          | 1.676113       |
| B2RDG0                         | Proteasom MSRRYDSR                   | 3                                                          | 1                                          | 2                                                                      | 1                                                        | 261                  | 29.4  | 7.72                 | 113.5                                                               | 67.9          | 1.671576       |
| Q86U17                         | Serpin A11 MGPAWLV                   | 2                                                          | 1                                          | 1                                                                      | 1                                                        | 422                  | 47    | 7.68                 | 89.4                                                                | 54            | 1.655556       |
| A0A0R4J2F                      | Spermatog MPRAQLE                    | 1                                                          | 1                                          | 2                                                                      | 1                                                        | 1361                 | 150   | 8.81                 | 36.4                                                                | 22.3          | 1.632287       |
| A8K9X5                         | cDNA FLJ7 MASNMDR                    | 2                                                          | 1                                          | 10                                                                     | 1                                                        | 650                  | 73.9  | 4.88                 | 2038.2                                                              | 1282.7        | 1.588992       |
| P07996                         | Thrombosç MGLAWGL                    | 37                                                         | 39                                         | 390                                                                    | 1                                                        | 1170                 | 129.3 | 4.94                 | 606.1                                                               | 392.8         | 1.543024       |
| Q8NF17                         | FLJ00385 p LWLWGRE'                  | 23                                                         | 10                                         | 100                                                                    | 2                                                        | 509                  | 56.1  | 7.59                 | 370.4                                                               | 242.4         | 1.528053       |
| Q9H628                         | Ras-relatec MSNFLHLK                 | 4                                                          | 1                                          | 3                                                                      | 1                                                        | 205                  | 23.8  | 9.51                 | 295.1                                                               | 196           | 1.505612       |
| Q12841                         | Follistatin-  MWKRWL/                | 3                                                          | 1                                          | 1                                                                      | 1                                                        | 308                  | 35    | 5.52                 | 39.1                                                                | 26.6          | 1.469925       |
| Q8TCZ8                         | Apolipoprc RLGADMEI                  | 54                                                         | 3                                          | 161                                                                    | 1                                                        | 57                   | 6.7   | 9.98                 | 559.4                                                               | 380.9         | 1.468627       |
| A8K486                         | Peptidyl-pr MVNPTVFF                 | 5                                                          | 1                                          | 1                                                                      | 1                                                        | 165                  | 18    | 6.9                  | 13.8                                                                | 9.5           | 1.452632       |
| Q96S96                         | Phosphatic MGWTMRI                   | 4                                                          | 1                                          | 2                                                                      | 1                                                        | 227                  | 25.7  | 6.54                 | 46.8                                                                | 32.3          | 1.448916       |
| P05164                         | Myelopero MGVPFFSS                   | 7                                                          | 5                                          | 7                                                                      | 5                                                        | 745                  | 83.8  | 8.97                 | 216                                                                 | 150.6         | 1.434263       |
| P02533                         | Keratin, tyj MTTC SRQF               | 16                                                         | 8                                          | 40                                                                     | 2                                                        | 472                  | 51.5  | 5.16                 | 79                                                                  | 55.3          | 1.428571       |
| A0A125U0'                      | GCT-A2 he: EVQLVESG'                 | 15                                                         | 1                                          | 1                                                                      | 1                                                        | 126                  | 13.8  | 5.45                 | 26.9                                                                | 18.9          | 1.42328        |
| Q05639                         | Elongation MGKEKTHI                  | 2                                                          | 1                                          | 2                                                                      | 1                                                        | 463                  | 50.4  | 9.03                 | 56.2                                                                | 40.3          | 1.394541       |
| H3BQD0                         | Cerebellin- MLGVLELLI                | 11                                                         | 1                                          | 2                                                                      | 1                                                        | 140                  | 14.7  | 5.48                 | 18.1                                                                | 13            | 1.392308       |
| P00738                         | Haptoglobi MSALGAVI.                 | 57                                                         | 27                                         | 2184                                                                   | 12                                                       | 406                  | 45.2  | 6.58                 | 258436.5                                                            | 185933.7      | 1.389939       |
| B7ZMD7                         | Alpha-amy MKLFWLLF                   | 3                                                          | 1                                          | 1                                                                      | 1                                                        | 511                  | 57.7  | 6.93                 | 49                                                                  | 35.3          | 1.388102       |
| P00918                         | Carbonic a  MSHHWGY                  | 12                                                         | 3                                          | 5                                                                      | 3                                                        | 260                  | 29.2  | 7.4                  | 170                                                                 | 122.8         | 1.384365       |
| A8K6A6                         | cDNA FLJ7 MGLPRLVC                   | 11                                                         | 6                                          | 13                                                                     | 6                                                        | 646                  | 71.6  | 5.67                 | 878.3                                                               | 640.8         | 1.37063        |
| A8K430                         | Fructose-b MAHRFPAL                  | 21                                                         | 5                                          | 9                                                                      | 5                                                        | 364                  | 39.4  | 8.21                 | 152.2                                                               | 111.1         | 1.369937       |



|          |                       |    |    |      |    |      |       |      |          |          |          |
|----------|-----------------------|----|----|------|----|------|-------|------|----------|----------|----------|
| P07737   | Profilin-1 C MAGWNA\  | 27 | 3  | 12   | 3  | 140  | 15    | 8.27 | 337.3    | 247.6    | 1.362278 |
| P37802   | Transgelin- MANRGPA\  | 30 | 5  | 14   | 5  | 199  | 22.4  | 8.25 | 605.5    | 445.5    | 1.359147 |
| S6B2A1   | IgG L chain MVLQTQVI  | 23 | 3  | 107  | 1  | 184  | 20.4  | 5.52 | 20.7     | 15.4     | 1.344156 |
| P04275   | von Willeb MIPARFAG   | 23 | 51 | 243  | 2  | 2813 | 309.1 | 5.48 | 13496.9  | 10196    | 1.323745 |
| A0A1B0GU | Ig mu chain GSASAPTLF | 38 | 16 | 591  | 3  | 474  | 51.9  | 6.15 | 55273.6  | 41758.8  | 1.32364  |
| P67936   | Tropomyo: MAGLNSLE    | 8  | 2  | 4    | 2  | 248  | 28.5  | 4.69 | 433.9    | 328.1    | 1.322463 |
| D3DPK5   | SH3 domai KQLKPSKAI   | 4  | 1  | 1    | 1  | 257  | 26.8  | 8.38 | 83.4     | 63.5     | 1.313386 |
| O43866   | CD5 antige MALLFSLIL  | 33 | 8  | 25   | 8  | 347  | 38.1  | 5.47 | 1626.1   | 1243.5   | 1.30768  |
| A0A060VC | MHC class SHSMRYFF    | 5  | 1  | 9    | 1  | 340  | 38.5  | 6.15 | 1310.8   | 1005.6   | 1.3035   |
| Q86TT1   | Full-length MQGTDEH   | 41 | 14 | 575  | 1  | 375  | 41.2  | 6.79 | 818      | 628.3    | 1.301926 |
| Q8IXL6   | Extracellul: MKMMLVF  | 3  | 1  | 1    | 1  | 584  | 66.2  | 7.74 | 92.9     | 121.2    | 0.766502 |
| A0A140VK | Leukotrien MPEIVDTC   | 2  | 1  | 1    | 1  | 611  | 69.2  | 6.18 | 24       | 31.4     | 0.764331 |
| Q6MZX7   | Putative ur MELMCKKI  | 16 | 6  | 73   | 2  | 476  | 52.4  | 7.77 | 938.7    | 1228.3   | 0.764227 |
| Q8NGE6   | Olfactory r MGDKGTG   | 6  | 1  | 16   | 1  | 254  | 28.1  | 7.91 | 898.4    | 1201.7   | 0.747608 |
| P02768   | Serum albu MKWVTFIS   | 62 | 47 | 4176 | 47 | 609  | 69.3  | 6.28 | 273544.9 | 374998.6 | 0.729456 |
| E5RG27   | Casein kin2 MASSSGSK  | 17 | 1  | 1    | 1  | 78   | 8.5   | 9.7  | 80       | 115.8    | 0.690846 |
| A0A024QZ | Serine/thre MELLRTITY | 2  | 1  | 3    | 1  | 685  | 78.2  | 8.24 | 246.8    | 359.7    | 0.686127 |
| Q7Z7Q0   | APOB prot: MDPPRPAL   | 58 | 50 | 3404 | 1  | 825  | 92.3  | 7.42 | 163      | 369.3    | 0.441376 |

| Uniprot<br>Accession<br>Number | Protein<br>name | Protein<br>amino acid<br>sequence | Protein<br>amino acid<br>sequence<br>matching<br>degree(%) | The<br>number of<br>peptides<br>identified | The total<br>number of<br>polypepti<br>de was<br>identified | The<br>number of<br>peptides<br>identified | Amino<br>acid length | KDa   | isoelectric<br>point | relative<br>abundanc<br>e of<br>normalize<br>d protein -<br>control |               |                |
|--------------------------------|-----------------|-----------------------------------|------------------------------------------------------------|--------------------------------------------|-------------------------------------------------------------|--------------------------------------------|----------------------|-------|----------------------|---------------------------------------------------------------------|---------------|----------------|
|                                |                 |                                   |                                                            |                                            |                                                             |                                            |                      |       |                      | sample<br>119                                                       | sample<br>121 | ratio(119/121) |
| P02741                         | C-reactive      | MEKLLCFLV                         | 24                                                         | 6                                          | 38                                                          | 6                                          | 224                  | 25    | 5.63                 | 4798.1                                                              | 1082.9        | 4.430788       |
| A0A125QY                       | GCT-A9 ligl     | DIQMTQSP                          | 32                                                         | 2                                          | 5                                                           | 2                                          | 107                  | 11.6  | 4.65                 | 270.5                                                               | 100.7         | 2.686197       |
| Q05639                         | Elongation      | MGKEKTHI                          | 2                                                          | 1                                          | 2                                                           | 1                                          | 463                  | 50.4  | 9.03                 | 104.1                                                               | 40.3          | 2.583127       |
| G9K388                         | YWHAE/FA        | RADPAGAA                          | 5                                                          | 2                                          | 5                                                           | 2                                          | 384                  | 41.2  | 4.97                 | 340.3                                                               | 139.1         | 2.446441       |
| A0A0R4J2F                      | Spermatog       | MPRAQLLE                          | 1                                                          | 1                                          | 2                                                           | 1                                          | 1361                 | 150   | 8.81                 | 52.8                                                                | 22.3          | 2.367713       |
| P00738                         | Haptoglobi      | MSALGAVI                          | 57                                                         | 27                                         | 2184                                                        | 12                                         | 406                  | 45.2  | 6.58                 | 410792.3                                                            | 185933.7      | 2.209348       |
| B2R4R0                         | Histone H4      | MSGRGKGI                          | 17                                                         | 2                                          | 10                                                          | 2                                          | 103                  | 11.4  | 11.36                | 564.9                                                               | 266.4         | 2.120495       |
| P02763                         | Alpha-1-ac      | MALSWVLI                          | 45                                                         | 9                                          | 562                                                         | 6                                          | 201                  | 23.5  | 5.02                 | 45114                                                               | 21588.2       | 2.089753       |
| Q8TCZ8                         | Apolipoprc      | RLGADMEI                          | 54                                                         | 3                                          | 161                                                         | 1                                          | 57                   | 6.7   | 9.98                 | 698.9                                                               | 380.9         | 1.834865       |
| Q9H628                         | Ras-relatec     | MSNFLHLK                          | 4                                                          | 1                                          | 3                                                           | 1                                          | 205                  | 23.8  | 9.51                 | 349.6                                                               | 196           | 1.783673       |
| B2RDG0                         | Proteasom       | MSRRYDSR                          | 3                                                          | 1                                          | 2                                                           | 1                                          | 261                  | 29.4  | 7.72                 | 120.2                                                               | 67.9          | 1.77025        |
| PODJI8                         | Serum amy       | MKLLTGLV                          | 41                                                         | 4                                          | 22                                                          | 2                                          | 122                  | 13.5  | 6.79                 | 683.4                                                               | 389.3         | 1.755459       |
| P00739                         | Haptoglobi      | MSDLGAVI                          | 53                                                         | 21                                         | 1147                                                        | 6                                          | 348                  | 39    | 7.09                 | 4403                                                                | 2635.5        | 1.670651       |
| PODJI9                         | Serum amy       | MKLLTGLV                          | 25                                                         | 4                                          | 16                                                          | 2                                          | 122                  | 13.5  | 9.14                 | 467.6                                                               | 294.1         | 1.589935       |
| Q9ULV0                         | Unconvent       | MSVGELYS                          | 0                                                          | 2                                          | 8                                                           | 2                                          | 1848                 | 213.5 | 7.2                  | 84.6                                                                | 53.7          | 1.575419       |
| A0A024R6I                      | Alpha-1-an      | MPSSVSWI                          | 61                                                         | 31                                         | 1672                                                        | 1                                          | 418                  | 46.7  | 5.59                 | 254797.8                                                            | 165755.8      | 1.537188       |
| V9HW31                         | ATP syntha      | MLGFVGRV                          | 4                                                          | 2                                          | 4                                                           | 2                                          | 529                  | 56.5  | 5.4                  | 122.9                                                               | 83.6          | 1.470096       |
| P18428                         | Lipopolysa      | MGALARAI                          | 9                                                          | 4                                          | 26                                                          | 4                                          | 481                  | 53.4  | 6.7                  | 1446.9                                                              | 996.7         | 1.451691       |
| B4DQY7                         | cDNA FLJ5       | MSWFNAS                           | 1                                                          | 1                                          | 1                                                           | 1                                          | 992                  | 111.7 | 4.87                 | 22.6                                                                | 15.6          | 1.448718       |
| P19652                         | Alpha-1-ac      | MALSWVLI                          | 47                                                         | 10                                         | 310                                                         | 7                                          | 201                  | 23.6  | 5.11                 | 27901.1                                                             | 19263.5       | 1.448392       |
| D6W5L6                         | Pulmonary       | MHQAGYP                           | 3                                                          | 1                                          | 2                                                           | 1                                          | 393                  | 43.3  | 5.74                 | 38.6                                                                | 27.1          | 1.424354       |
| Q07954                         | Prolow-der      | MLTPPLLLL                         | 1                                                          | 2                                          | 4                                                           | 2                                          | 4544                 | 504.3 | 5.39                 | 31.1                                                                | 22.3          | 1.394619       |
| A0A1B0GV                       | GRAM don        | MVQNLQP                           | 3                                                          | 1                                          | 1                                                           | 1                                          | 767                  | 88.6  | 6.44                 | 46.9                                                                | 33.8          | 1.387574       |
| Q9H804                         | cDNA FLJ1       | MPGPRVW                           | 21                                                         | 7                                          | 38                                                          | 1                                          | 438                  | 48    | 7.46                 | 212.9                                                               | 156.4         | 1.361253       |
| A0A068LLI                      | Ig heavy ch     | QVQLVQSC                          | 19                                                         | 2                                          | 16                                                          | 1                                          | 120                  | 13.3  | 7.93                 | 80.2                                                                | 59.3          | 1.352445       |

|          |                                  |    |    |      |    |      |       |      |          |          |          |
|----------|----------------------------------|----|----|------|----|------|-------|------|----------|----------|----------|
| D3DPK5   | SH3 domain KQLKPSKAI             | 4  | 1  | 1    | 1  | 257  | 26.8  | 8.38 | 85       | 63.5     | 1.338583 |
| P02750   | Leucine-ric MSSWSRQ              | 28 | 9  | 294  | 9  | 347  | 38.2  | 6.95 | 27178.7  | 20434.1  | 1.330066 |
| B3KS79   | cDNA FLJ31 MKIHYSRQ              | 34 | 19 | 1335 | 19 | 448  | 50.6  | 5.63 | 132515.7 | 99858    | 1.327041 |
| V9HVY1   | Epididymis MKRMVSV               | 2  | 1  | 1    | 1  | 491  | 55.9  | 8.27 | 68       | 51.6     | 1.317829 |
| Q16853   | Membrane MNQKTILV                | 9  | 5  | 9    | 5  | 763  | 84.6  | 6.52 | 76.7     | 99.9     | 0.767768 |
| E5RG27   | Casein kinase MASSSGSK           | 17 | 1  | 1    | 1  | 78   | 8.5   | 9.7  | 88.9     | 115.8    | 0.767703 |
| Q4ZG40   | Macrophage MRNKKILKI             | 3  | 1  | 2    | 1  | 520  | 52.6  | 8.78 | 131.7    | 171.9    | 0.766143 |
| J3KPA1   | Cysteine-rich MKQILHPA           | 9  | 3  | 13   | 3  | 276  | 31    | 7.61 | 1279.2   | 1673.4   | 0.764432 |
| V9GYM3   | Apolipoprotein MCEQHPKI          | 32 | 6  | 446  | 6  | 133  | 14.9  | 8.27 | 44102    | 58257.6  | 0.757017 |
| A0A0C4DG | Poliovirus 1 MARAMAA             | 2  | 1  | 2    | 1  | 417  | 45.3  | 6.52 | 253.4    | 336.2    | 0.753718 |
| Q13103   | Secreted protein MISRMEKN        | 27 | 5  | 11   | 5  | 211  | 24.3  | 8.32 | 215.2    | 286.8    | 0.750349 |
| J3KMX3   | Alpha-fetoprotein MKWVESIF       | 1  | 1  | 3    | 1  | 622  | 70.4  | 5.55 | 46.4     | 61.9     | 0.749596 |
| P06727   | Apolipoprotein MFLKAVVL          | 70 | 36 | 1655 | 36 | 396  | 45.4  | 5.38 | 98547    | 132070.1 | 0.746172 |
| B2R815   | cDNA, FLJ9 MHLIDYLLL             | 38 | 15 | 289  | 15 | 427  | 48.5  | 7.75 | 13815.6  | 18523.7  | 0.745834 |
| P49908   | Selenoprotein MWRSLGL            | 14 | 6  | 50   | 6  | 381  | 43.2  | 7.87 | 2561.1   | 3441.9   | 0.744095 |
| P02743   | Serum amyloid MNKPLLWI           | 25 | 6  | 181  | 6  | 223  | 25.4  | 6.54 | 9575.8   | 12930.8  | 0.740542 |
| O94818   | Nucleolar protein MESERDM        | 3  | 1  | 1    | 1  | 638  | 71.3  | 5.62 | 44.9     | 60.9     | 0.737274 |
| B3KUE5   | Phospholipase MGLSGSDN           | 9  | 4  | 16   | 4  | 513  | 56.6  | 6.64 | 662.1    | 901.5    | 0.734443 |
| Q66K66   | Transmembrane MPGTVATL           | 3  | 1  | 5    | 1  | 360  | 39.4  | 9.92 | 380.9    | 522.4    | 0.729135 |
| P25391   | Laminin subunit MRGGVLLV         | 0  | 1  | 2    | 1  | 3075 | 336.9 | 6.35 | 49.1     | 67.6     | 0.726331 |
| A4D2D2   | Procollagen 1 MLPAATAS           | 12 | 4  | 7    | 4  | 449  | 47.9  | 7.43 | 96.7     | 134.5    | 0.718959 |
| Q96JG6   | Syndetin 1 MQKIKSLM              | 1  | 1  | 4    | 1  | 964  | 111.1 | 6.2  | 189.2    | 264.9    | 0.714232 |
| Q4LE64   | NUMA1 variant LSGITKMTL          | 1  | 1  | 45   | 1  | 2121 | 238.7 | 5.81 | 571.4    | 802.5    | 0.712025 |
| B2R9V7   | Superoxide dismutase MLALLCSCI   | 12 | 2  | 5    | 2  | 240  | 25.9  | 6.79 | 73.1     | 103      | 0.709709 |
| P23470   | Receptor tyrosine kinase MRRLEPC | 4  | 4  | 5    | 4  | 1445 | 161.9 | 6.42 | 104.6    | 147.9    | 0.707235 |
| Q9Y5Y7   | Lymphatic MARCFSLV               | 11 | 4  | 24   | 4  | 322  | 35.2  | 8.28 | 964.9    | 1364.9   | 0.706938 |
| B2R6V9   | cDNA, FLJ9 MSETSRTA              | 2  | 1  | 1    | 1  | 732  | 83.2  | 6    | 37.2     | 52.7     | 0.705882 |
| A0A024R1 | Contactin 1 MKMWLLV              | 1  | 1  | 2    | 1  | 1018 | 113.2 | 5.9  | 29.5     | 41.9     | 0.704057 |
| P35916   | Vascular endothelial MQRGAAL     | 2  | 1  | 1    | 1  | 1363 | 152.7 | 6.3  | 31.2     | 44.5     | 0.701124 |
| A0A068LR | Ig heavy chain QVTLRESGI         | 6  | 1  | 4    | 1  | 127  | 14    | 8.15 | 73.3     | 104.6    | 0.700765 |
| A0A140TA | Complement MRLWGLI               | 48 | 76 | 5311 | 1  | 1698 | 187.5 | 7.33 | 7018.6   | 10069.7  | 0.697002 |
| E7EQ64   | Trypsin-1 C MNPLLILTF            | 11 | 2  | 20   | 2  | 261  | 28.1  | 7.25 | 229.1    | 329.5    | 0.695296 |
| A8K9X5   | cDNA FLJ71 MASNMDR               | 2  | 1  | 10   | 1  | 650  | 73.9  | 4.88 | 880.6    | 1282.7   | 0.686521 |

|           |                      |    |    |      |    |      |       |      |          |          |          |
|-----------|----------------------|----|----|------|----|------|-------|------|----------|----------|----------|
| A0A024R81 | Glucosidas MGVRHPP   | 1  | 1  | 1    | 1  | 952  | 105.3 | 6    | 42       | 61.2     | 0.686275 |
| Q7Z7Q0    | APOB prot MDPPRPAL   | 58 | 50 | 3404 | 1  | 825  | 92.3  | 7.42 | 248.4    | 369.3    | 0.672624 |
| Q8NBP7    | Proprotein MGTVSSRF  | 5  | 3  | 4    | 3  | 692  | 74.2  | 6.61 | 92.9     | 138.5    | 0.670758 |
| B7Z3G0    | cDNA FLJ51 MSARRTSH  | 2  | 1  | 16   | 1  | 833  | 94.1  | 6.87 | 191.9    | 295.9    | 0.64853  |
| Q6PIY7    | Poly(A) RN MFPNSILGI | 2  | 1  | 1    | 1  | 484  | 56    | 9.38 | 43       | 67.2     | 0.639881 |
| A0A024QZ1 | Serine/thr MELLRTITY | 2  | 1  | 3    | 1  | 685  | 78.2  | 8.24 | 223.6    | 359.7    | 0.621629 |
| A0A075B61 | Dynein he MEKDAEDC   | 0  | 1  | 6    | 1  | 4707 | 538.3 | 6.13 | 77       | 130.9    | 0.588235 |
| P02768    | Serum albu MKWVTFIS  | 62 | 47 | 4176 | 47 | 609  | 69.3  | 6.28 | 216497.6 | 374998.6 | 0.577329 |
| Q8IXL6    | Extracellul MKMMLVF  | 3  | 1  | 1    | 1  | 584  | 66.2  | 7.74 | 48.6     | 121.2    | 0.40099  |
| A0A1B1CY1 | Vitamin D LAERLKAKL  | 38 | 2  | 104  | 2  | 34   | 3.7   | 8.56 | 3808.9   | 10424.2  | 0.36539  |
