# Supplementary material for: LC‐MS/MS‐Based Quantitative Proteomics Analysis of Different Stages of Non‐Small‐Cell Lung Cancer
Source: Hindawi journal article supplement (doi:10.1155/2021/5561569), 2021-01-01
Supplement: f2 [file 5561569.f2.pdf]

| Uniprot Accession Number | Protein       | protein amino acid sequence | protein amino acid sequence matching degree (%) | number of identified polypeptides | total number of identified polypeptides | characteristic polypeptide number identified | length of amino acid | The molecular weight KDa | isoelectric point | relative abundance of normalized protein-sample 113 | relative abundance of normalized protein-sample 114 | relative abundance of normalized protein-sample 115 | relative abundance of normalized protein-sample 116 | relative abundance of normalized protein-sample 117 | relative abundance of normalized protein-sample 118 | relative abundance of normalized protein-sample 119 | relative abundance of normalized protein-sample 121 |
|--------------------------|---------------|-----------------------------|-------------------------------------------------|-----------------------------------|-----------------------------------------|----------------------------------------------|----------------------|--------------------------|-------------------|-----------------------------------------------------|-----------------------------------------------------|-----------------------------------------------------|-----------------------------------------------------|-----------------------------------------------------|-----------------------------------------------------|-----------------------------------------------------|-----------------------------------------------------|
| P02768                   | Serum albumin | MKWVTFIS                    | 73                                              | 56                                | 9971                                    | 56                                           | 609                  | 69.3                     | 6.28              | 862466.6                                            | 593482.1                                            | 2220421                                             | 846469.3                                            | 634302.5                                            | 736961.1                                            | 842297.5                                            | 666397.2                                            |
| P02760                   | Protein AM    | MRLSGALL                    | 51                                              | 16                                | 4825                                    | 5                                            | 352                  | 39                       | 6.25              | 294812.3                                            | 474165.8                                            | 203377.3                                            | 349197.6                                            | 346271.7                                            | 328356.1                                            | 411229.3                                            | 381627.7                                            |
| B4E1B2                   | cDNA FLJ5     | MRLAVGAI                    | 62                                              | 43                                | 1716                                    | 3                                            | 678                  | 74.8                     | 7.12              | 107560.1                                            | 85218.8                                             | 199640.4                                            | 90022.3                                             | 73427.3                                             | 82722                                               | 102491.8                                            | 78511.8                                             |
| A0A0K0K1                 | Epididymis    | MRLAVGAI                    | 58                                              | 42                                | 1721                                    | 2                                            | 698                  | 77                       | 7.21              | 4584.8                                              | 4234.8                                              | 8496.1                                              | 4193.7                                              | 3507.1                                              | 3632.2                                              | 4873.3                                              | 3358.1                                              |
| D3DNU8                   | Kininogen     | MKLITILFLC                  | 52                                              | 28                                | 3345                                    | 2                                            | 427                  | 47.8                     | 6.65              | 294936.6                                            | 257956.9                                            | 193831.3                                            | 290406.7                                            | 313453.3                                            | 279805.5                                            | 228883.9                                            | 302648.3                                            |
| B4E1C2                   | Kininogen     | MKLITILFLC                  | 36                                              | 27                                | 3259                                    | 1                                            | 644                  | 71.9                     | 6.81              | 229.7                                               | 263.2                                               | 278                                                 | 326                                                 | 265.5                                               | 290.3                                               | 341.5                                               | 167.9                                               |
| O60494                   | Cubilin OS-   | MMNMSLF                     | 22                                              | 61                                | 773                                     | 61                                           | 3623                 | 398.5                    | 5.35              | 45037.5                                             | 38654.5                                             | 34055.8                                             | 39708.6                                             | 44702.9                                             | 45025.7                                             | 32701.3                                             | 40132.6                                             |
| P98164                   | Low-density   | MDRGPAA                     | 19                                              | 75                                | 789                                     | 75                                           | 4655                 | 521.6                    | 5.08              | 45344.8                                             | 35817.7                                             | 35721.8                                             | 42157.7                                             | 46693.4                                             | 48624                                               | 38847.7                                             | 40915.4                                             |
| A0A024RA                 | Heparan su    | MRWTHSY                     | 17                                              | 57                                | 826                                     | 31                                           | 4346                 | 463.7                    | 6.51              | 43536.1                                             | 49827.7                                             | 33964.3                                             | 44780.9                                             | 46858.6                                             | 47703.5                                             | 37785.7                                             | 46985.3                                             |
| P01133                   | Pro-epider    | MLLTLIILLF                  | 29                                              | 33                                | 1041                                    | 33                                           | 1207                 | 133.9                    | 5.85              | 73109.5                                             | 66336.1                                             | 56680.9                                             | 70877.8                                             | 76444.3                                             | 81110.3                                             | 65749.7                                             | 75270.8                                             |
| Q6N093                   | Putative ur   | FFNYAMHV                    | 46                                              | 14                                | 2214                                    | 7                                            | 417                  | 46                       | 7.59              | 55632.5                                             | 48428.3                                             | 63601.5                                             | 65204.2                                             | 59384.5                                             | 40148.4                                             | 58939.1                                             | 47825.3                                             |
| X6RBG4                   | Uromoduli     | MRHIMTRI                    | 39                                              | 23                                | 3450                                    | 23                                           | 689                  | 75.6                     | 5.87              | 267652.8                                            | 169355                                              | 173051.8                                            | 249815.6                                            | 272871.5                                            | 323278.4                                            | 237342.9                                            | 364524.4                                            |
| S4R471                   | Protein AM    | HKSKWNIT                    | 51                                              | 10                                | 2476                                    | 1                                            | 193                  | 21.4                     | 7.25              | 830.2                                               | 1013.7                                              | 501.8                                               | 900.2                                               | 865.2                                               | 813.1                                               | 1077                                                | 913.4                                               |
| Q6MZQ6                   | Putative ur   | MEFGLSWI                    | 48                                              | 16                                | 2484                                    | 6                                            | 475                  | 52                       | 8.06              | 156851.3                                            | 141749.9                                            | 138599.9                                            | 186246.8                                            | 144680.4                                            | 140760.2                                            | 177689.2                                            | 150720                                              |
| A0A024R4                 | Fibronectin   | MLRGPGPC                    | 25                                              | 46                                | 468                                     | 46                                           | 2355                 | 259                      | 5.73              | 23599.9                                             | 22486.3                                             | 17512.3                                             | 26256.4                                             | 24031.8                                             | 23591                                               | 23870.8                                             | 23276.7                                             |
| P04746                   | Pancreatic    | MKFFLLLFT                   | 53                                              | 20                                | 829                                     | 3                                            | 511                  | 57.7                     | 7.05              | 3567.6                                              | 1554.5                                              | 3116.9                                              | 3014.4                                              | 3868.6                                              | 3474.2                                              | 2469.6                                              | 2613.9                                              |
| P01833                   | Polymeric     | MLLFVLTCI                   | 37                                              | 24                                | 1000                                    | 24                                           | 764                  | 83.2                     | 5.74              | 65223.8                                             | 51222.8                                             | 44831.7                                             | 57440.9                                             | 84481.8                                             | 65065.7                                             | 60349.2                                             | 75401.1                                             |
| V9HW34                   | Epididymis    | METPAQLL                    | 49                                              | 8                                 | 2857                                    | 1                                            | 235                  | 25.6                     | 6.55              | 787.8                                               | 1077.1                                              | 619                                                 | 873.4                                               | 900.6                                               | 903.4                                               | 875.5                                               | 908.7                                               |
| Q6PIL8                   | IGK@ prot     | METPAQLL                    | 47                                              | 8                                 | 2890                                    | 1                                            | 236                  | 25.8                     | 6.55              | 3026.6                                              | 3563                                                | 2074.2                                              | 2760.8                                              | 3139.4                                              | 3486.2                                              | 3443.1                                              | 3364.6                                              |
| Q6P5S8                   | IGK@ prot     | METPAQLL                    | 47                                              | 8                                 | 2911                                    | 1                                            | 236                  | 25.8                     | 6.33              | 151922.2                                            | 222216.3                                            | 121290.3                                            | 166687                                              | 160695.3                                            | 198000.3                                            | 194547.5                                            | 183839.5                                            |
| Q0KKI6                   | Immunoblob    | EIVMTQSP                    | 48                                              | 8                                 | 2901                                    | 1                                            | 219                  | 24                       | 8.06              | 3800.1                                              | 4394.4                                              | 2855.3                                              | 3317                                                | 4193.4                                              | 4965.8                                              | 4898.1                                              | 4700.9                                              |
| Q59E93                   | Membrane      | GSL SRLPTI                  | 33                                              | 35                                | 584                                     | 15                                           | 977                  | 110.5                    | 5.53              | 34854.5                                             | 27418                                               | 27084.2                                             | 34101                                               | 35756.3                                             | 28833.9                                             | 28075.9                                             | 32198.4                                             |
| B7ZMD7                   | Alpha-amy     | MKLFWLLF                    | 51                                              | 20                                | 717                                     | 3                                            | 511                  | 57.7                     | 6.93              | 36477.1                                             | 19818.9                                             | 29799.8                                             | 33533.9                                             | 37893.7                                             | 36147.9                                             | 26885.5                                             | 26254.5                                             |
| A0A161I20                | Lactoferrin   | MKLVFLVL                    | 54                                              | 34                                | 466                                     | 0                                            | 711                  | 78.3                     | 8.18              | 39936.6                                             | 20213.2                                             | 13042.9                                             | 22989.8                                             | 19645.5                                             | 23345.6                                             | 23066.2                                             | 15145.7                                             |
| A0A024R8                 | Glucosidase   | MGVRHPP                     | 25                                              | 19                                | 538                                     | 7                                            | 952                  | 105.3                    | 6                 | 26278.3                                             | 20740.9                                             | 19305.1                                             | 24136.9                                             | 25723                                               | 25941.7                                             | 21714.1                                             | 26196.1                                             |
| P00734                   | Prothrombin   | MAHVRGL                     | 33                                              | 17                                | 694                                     | 17                                           | 622                  | 70                       | 5.9               | 36023.3                                             | 30475.5                                             | 25009.6                                             | 33369.7                                             | 35911.5                                             | 37733                                               | 35981.5                                             | 39265.9                                             |
| Q96K68                   | cDNA FLJ1     | MELGLRW                     | 38                                              | 15                                | 1028                                    | 1                                            | 494                  | 53.1                     | 6.86              | 60465.5                                             | 47280                                               | 46205.5                                             | 55632                                               | 65877.7                                             | 56589.8                                             | 57673.3                                             | 63862.1                                             |
| B3VMW0                   | Lactoferrin   | MKLVFLVL                    | 54                                              | 34                                | 448                                     | 1                                            | 711                  | 78.3                     | 8.12              |                                                     |                                                     |                                                     |                                                     |                                                     |                                                     |                                                     |                                                     |
| W8QEY1                   | Lactoferrin   | MKLVFLVL                    | 52                                              | 33                                | 446                                     | 1                                            | 711                  | 78.3                     | 8.18              | 227.3                                               | 174.7                                               | 186.3                                               | 323.9                                               | 207.4                                               | 189.2                                               | 220.6                                               | 203                                                 |
| V9HWA9                   | Epididymis    | MGPTSGPS                    | 35                                              | 55                                | 305                                     | 55                                           | 1663                 | 187                      | 6.4               | 17774.3                                             | 14518.8                                             | 19834.7                                             | 14532.1                                             | 11925                                               | 17333.2                                             | 16259.6                                             | 10679.9                                             |
| Q5EFE6                   | Anti-RhD n    | MRVPAQLI                    | 40                                              | 6                                 | 2769                                    | 1                                            | 234                  | 25.7                     | 8.43              | 63.8                                                | 94.1                                                | 46.1                                                | 87.4                                                | 55.9                                                | 65.6                                                | 99.8                                                | 66                                                  |
| A0A024RD                 | Secreted p    | MRIAVICFC                   | 50                                              | 13                                | 1136                                    | 2                                            | 314                  | 35.4                     | 4.58              | 58597                                               | 41336.7                                             | 33620                                               | 55794.7                                             | 61223.2                                             | 73467.6                                             | 49830.6                                             | 70922.1                                             |
| Q59EG0                   | Basement      | SVTEGQTL                    | 15                                              | 27                                | 593                                     | 1                                            | 2331                 | 246.3                    | 7.23              | 1510.7                                              | 1463.9                                              | 1070.7                                              | 2426.2                                              | 2042.3                                              | 3369.3                                              | 1566.4                                              | 1737.4                                              |
| A0A140TA                 | Tenascin-X    | MMPAQYA                     | 19                                              | 46                                | 295                                     | 27                                           | 4242                 | 458                      | 5.17              | 15479.7                                             | 13776.6                                             | 11588.2                                             | 14985.1                                             | 15236.8                                             | 14675.1                                             | 12717                                               | 15142.2                                             |

|           |               |            |    |    |      |    |      |       |      |          |          |         |          |          |          |          |          |
|-----------|---------------|------------|----|----|------|----|------|-------|------|----------|----------|---------|----------|----------|----------|----------|----------|
| Q6N092    | Putative ur   | GEEPSTRSF  | 34 | 14 | 1008 | 1  | 519  | 56.4  | 6.93 | 212.3    | 170.6    | 187.3   | 215.6    | 195.9    | 161.8    | 243      | 292.1    |
| Q8NCL6    | cDNA FLJ9     | MQFGLSW    | 36 | 14 | 1007 | 1  | 493  | 53.2  | 6.52 | 111.4    | 103.6    | 88.7    | 97       | 97.6     | 94.8     | 97.1     | 95.9     |
| E9KL23    | Epididymis    | MPSSVSWC   | 53 | 24 | 660  | 1  | 418  | 46.7  | 5.59 | 2619.7   | 1850.8   | 4131.1  | 1940.5   | 1781.5   | 1987.8   | 2198.3   | 1716     |
| P25311    | Zinc-alpha    | MVRMVPV    | 60 | 20 | 1734 | 20 | 298  | 34.2  | 6.05 | 103361.5 | 236874.5 | 90208.1 | 112762.6 | 114953.3 | 87034.2  | 132935.6 | 151729.7 |
| AOA024RD  | Secreted p    | MRIAVICFC  | 47 | 12 | 1140 | 1  | 300  | 33.8  | 4.61 | 7830     | 6811.9   | 4818.4  | 8363.9   | 8910.8   | 10063.6  | 8087.2   | 9894.7   |
| AOA024R6  | Alpha-1-an    | MPSSVSWC   | 53 | 24 | 629  | 1  | 418  | 46.7  | 5.59 | 44423.8  | 33176.1  | 80233.1 | 38125.8  | 36761.6  | 37927.4  | 49272.2  | 30932.8  |
| P35555    | Fibrillin-1 C | MRRGRLLC   | 18 | 41 | 372  | 41 | 2871 | 312   | 4.93 | 24349.7  | 20530    | 19914.2 | 23308.7  | 24593.8  | 22820.3  | 21604.6  | 24928.2  |
| P12109    | Collagen al   | MRAARALL   | 27 | 24 | 633  | 24 | 1028 | 108.5 | 5.43 | 33324.9  | 28063    | 23704.5 | 29432.1  | 35827.7  | 35265.8  | 28378.3  | 31949.7  |
| A8KAJ3    | cDNA FLJ7     | MLKALFTI   | 42 | 16 | 411  | 3  | 493  | 54.6  | 5.14 | 24208.6  | 28686.9  | 17831.4 | 24959.9  | 27916.5  | 24654.5  | 21521.2  | 26275.3  |
| AOA0S2Z3  | Lectin gala   | MTPPRLFM   | 38 | 20 | 537  | 20 | 585  | 65.3  | 5.27 | 24440.8  | 21860.8  | 20279.5 | 22939.6  | 26958.2  | 29734.9  | 24870.3  | 27682.3  |
| E7ER45    | Maltase-gl    | MARCKLKK   | 21 | 32 | 400  | 32 | 2753 | 311.8 | 5.41 | 20741    | 15799.2  | 15308.5 | 19737.9  | 19120.9  | 20698.3  | 17321    | 17395.7  |
| AOA024R8  | Prostaglan    | MATHHTLV   | 41 | 6  | 3425 | 6  | 190  | 21    | 7.8  | 132959.1 | 249501.5 | 92848.1 | 168444.8 | 144643.5 | 167428.8 | 131771.6 | 157265.4 |
| P15309    | Prostatic a   | MRAAPLLL   | 32 | 13 | 827  | 13 | 386  | 44.5  | 6.24 | 44629.5  | 66404    | 57259.6 | 45211.6  | 65647.6  | 24586.7  | 22654.6  | 60390    |
| P02763    | Alpha-1-ac    | MALSWVL    | 40 | 7  | 965  | 5  | 201  | 23.5  | 5.02 | 35706.4  | 76375    | 34617.4 | 42550.7  | 30650.9  | 32510.1  | 95028.1  | 48390.7  |
| A8K5A4    | cDNA FLJ7     | MKILILGIFL | 28 | 24 | 284  | 24 | 1065 | 122.1 | 5.74 | 16788.8  | 14281.1  | 18971.2 | 15934.6  | 14697.8  | 16077.5  | 20626.8  | 14909.8  |
| AOA0S2Z3  | EGF contai    | MLKALFTI   | 46 | 14 | 386  | 1  | 413  | 45.7  | 5.47 | 164.5    | 149.8    | 117.7   | 158      | 151.2    | 239.5    | 123.5    | 118.6    |
| P01861    | Ig gamma-     | ASTKGPSVI  | 57 | 12 | 1024 | 5  | 327  | 35.9  | 7.36 | 4652.6   | 6314.7   | 6267.9  | 4620.4   | 4081.8   | 4058.3   | 5555.8   | 4247.9   |
| AOA024R6  | Serpin pep    | MQLFLLLC   | 37 | 16 | 531  | 16 | 406  | 45.6  | 9.26 | 30478.7  | 25865.8  | 26139.5 | 30958.3  | 33303.9  | 33812    | 29852    | 27414.4  |
| Q16270    | Insulin-like  | MERPSLRA   | 58 | 16 | 582  | 16 | 282  | 29.1  | 7.9  | 38283.2  | 32001.3  | 27463.2 | 32943.9  | 37954.8  | 37956.2  | 29811.2  | 39312.4  |
| AOA024RD  | Secreted p    | MRIAVICFC  | 45 | 11 | 554  | 2  | 287  | 32.3  | 4.55 | 77.9     | 67.3     | 75.4    | 76.2     | 78.8     | 98       | 74.1     | 86.6     |
| P04279    | Semenoge      | MKPNIIFVL  | 53 | 23 | 236  | 17 | 462  | 52.1  | 9.29 | 16697.1  | 19411.5  | 10585.7 | 60356.9  | 13960    | 9603.9   | 8685.3   | 12317.9  |
| P00738    | Haptoglob     | MSALGAVI   | 46 | 19 | 454  | 19 | 406  | 45.2  | 6.58 | 23271.4  | 32501.8  | 26124.5 | 22935.7  | 18392    | 29883.6  | 86108.9  | 22466.7  |
| AOA0G2JPI | Compleme      | MRLWGLI    | 20 | 34 | 216  | 1  | 1744 | 192.8 | 7.03 | 8787.4   | 9127.2   | 7777.3  | 8628.3   | 9221.3   | 9747     | 9042     | 7727.2   |
| W0UV60    | Ribonuclea    | MVPKLFTS   | 20 | 3  | 946  | 3  | 161  | 18.3  | 8.73 | 40770.4  | 50060    | 31349.3 | 49333.6  | 39027.6  | 51040    | 35397.7  | 45540.4  |
| POCOL5    | Compleme      | MRLWGLI    | 20 | 34 | 218  | 1  | 1744 | 192.6 | 7.27 | 332.7    | 299      | 292.7   | 364.7    | 344.8    | 388.6    | 450.4    | 344.9    |
| O75882    | Attractin O   | MVAAAAA    | 24 | 28 | 201  | 28 | 1429 | 158.4 | 7.31 | 12022.7  | 10543.3  | 9668.8  | 11707.2  | 12428.8  | 11456.7  | 10342.8  | 12416    |
| A8K3U3    | cDNA FLJ7     | MQTCPLAF   | 14 | 2  | 618  | 2  | 248  | 27    | 7.43 | 29720.3  | 38789.3  | 23338.3 | 31760.1  | 30231.1  | 39678.5  | 27395.3  | 27654.4  |
| P02790    | Hemopexin     | MARVLGAI   | 47 | 18 | 503  | 18 | 462  | 51.6  | 7.02 | 30288.1  | 32208    | 29317.9 | 26373    | 27211.1  | 29882.3  | 30681.3  | 27113.3  |
| P10909    | Clusterin O   | MMKTLLLF   | 33 | 16 | 465  | 16 | 449  | 52.5  | 6.27 | 32485.9  | 31163    | 27176   | 31832.6  | 38559.5  | 33439.7  | 32173.1  | 29940.2  |
| A8K7T4    | cDNA FLJ7     | MAAEGWI    | 47 | 16 | 724  | 16 | 356  | 40.2  | 6.95 | 51924.6  | 60344.1  | 37340.5 | 58631.6  | 57770.6  | 63919.2  | 64303.9  | 57175.3  |
| P54802    | Alpha-N-ac    | MEAVAVA    | 31 | 18 | 268  | 18 | 743  | 82.2  | 6.65 | 9813.9   | 7723.2   | 6953.8  | 8759.3   | 9550.4   | 8998.8   | 7625.2   | 8664.6   |
| P63261    | Actin, cyto   | MEEEEIALV  | 42 | 14 | 229  | 5  | 375  | 41.8  | 5.48 | 16761    | 11559.1  | 10082.5 | 12801.4  | 16140    | 15279.7  | 13624    | 11164.5  |
| E9PGN7    | Plasma prc    | MGAGPGR    | 24 | 13 | 593  | 13 | 543  | 59.5  | 6.76 | 38639.8  | 32778.5  | 29434.6 | 35619.4  | 43925.7  | 38370.4  | 33662.9  | 37295.4  |
| S6BGD6    | IgG L chain   | MAGFPLLL   | 44 | 8  | 1430 | 1  | 235  | 24.8  | 7.24 | 1291.3   | 1704.5   | 1076.6  | 1469.4   | 1395.2   | 1573.3   | 1729.3   | 1427.4   |
| P06396    | Gelsolin O    | MAPHRPAI   | 28 | 19 | 403  | 19 | 782  | 85.6  | 6.28 | 22734.5  | 33262.8  | 17664.8 | 27384.1  | 28500    | 26508.5  | 25927.5  | 25485.9  |
| P00747    | Plasminoge    | MEHKEVVI   | 40 | 27 | 256  | 27 | 810  | 90.5  | 7.24 | 16945.7  | 16062.8  | 14786.9 | 15645.1  | 16065.9  | 14859.2  | 17672.5  | 15357.1  |
| B7ZKJ8    | ITIH4 prote   | MKPPRPVF   | 20 | 17 | 720  | 17 | 935  | 103.8 | 6.89 | 36663.7  | 32179.9  | 31430.2 | 38048    | 39069.7  | 40363    | 40159    | 35519.9  |
| Q8N355    | IGL@ prote    | MAWTVLL    | 43 | 8  | 1436 | 1  | 234  | 24.8  | 6.37 | 138.3    | 270.6    | 104     | 167.5    | 126.6    | 135      | 176.5    | 194.2    |
| B4DPH5    | cDNA FLJ5     | MVLNDVYI   | 34 | 21 | 324  | 1  | 533  | 61.4  | 5.33 | 22.1     | 22.6     | 36.2    | 46.9     | 25.7     | 16.7     | 38.3     | 31.5     |
| A2NUT2    | Lambda-ch     | MTCSPLLL   | 38 | 9  | 1468 | 3  | 235  | 24.6  | 7.62 | 86013.1  | 177227.2 | 72587.9 | 126455.5 | 97513.4  | 122835.2 | 118501.6 | 101417.1 |
| Q6GMV8    | Uncharacte    | MAWTVLL    | 42 | 8  | 1402 | 1  | 234  | 24.9  | 6.67 | 3551.6   | 6709.7   | 3229.9  | 4419.4   | 3762     | 5315.5   | 4920.8   | 4273.6   |

|        |             |           |    |    |      |    |      |       |      |          |          |         |          |          |          |         |          |
|--------|-------------|-----------|----|----|------|----|------|-------|------|----------|----------|---------|----------|----------|----------|---------|----------|
| P05062 | Fructose-b  | MAHRFPAL  | 43 | 14 | 296  | 13 | 364  | 39.4  | 7.87 | 14342.3  | 10885.6  | 8662.9  | 10906.9  | 14848.6  | 12235.8  | 10101.6 | 10140.5  |
| B7Z6Q5 | Beta-galac  | MPGFLVRI  | 26 | 15 | 197  | 15 | 725  | 81.8  | 7.94 | 10000.1  | 5876.3   | 6354.8  | 8239.7   | 8969.4   | 9596.4   | 7496.3  | 6953.9   |
| Q569I7 | Uncharact   | MDMRVPA   | 27 | 4  | 1473 | 1  | 189  | 20.7  | 5.27 | 145.7    | 136.2    | 114     | 110.6    | 119.4    | 158.6    | 169.9   | 134.5    |
| S6B294 | IgG L chain | MDMRVPA   | 28 | 4  | 1477 | 1  | 185  | 20.1  | 8.72 | 44.7     | 58       | 40.4    | 38.9     | 48.2     | 39.1     | 43.1    | 43       |
| Q6GMX4 | IGL@ prote  | MAWSPLLI  | 38 | 7  | 1438 | 1  | 236  | 24.8  | 6.89 | 500.4    | 544.7    | 460.9   | 521      | 464.8    | 528.8    | 551     | 479.1    |
| S6AWD6 | IgG L chain | MRLPAQLL  | 34 | 5  | 1475 | 2  | 178  | 19.4  | 8.46 | 233.9    | 216.7    | 193.5   | 205.1    | 189.3    | 236.3    | 207.4   | 194.6    |
| S6AWD3 | IgG L chain | MRLPAQLL  | 23 | 4  | 1483 | 1  | 183  | 19.9  | 8.91 | 1018     | 1199.2   | 751.7   | 1491.4   | 928.4    | 992.7    | 1199.5  | 830      |
| Q8NBJ4 | Golgi mem   | MMGLGNC   | 43 | 18 | 207  | 18 | 401  | 45.3  | 4.97 | 9235.2   | 7610.4   | 7144.5  | 9294.5   | 10319.8  | 9231.9   | 7727.5  | 10165.7  |
| S6BGE9 | IgG L chain | MRLPAQLL  | 23 | 4  | 1509 | 1  | 183  | 19.9  | 8.9  | 2212.7   | 2856     | 1550.1  | 2192.6   | 2079.4   | 2231     | 2508.7  | 2152.9   |
| Q6IPQ0 | IGL@ prote  | MAWALLLI  | 38 | 7  | 1432 | 1  | 236  | 24.8  | 6.76 |          |          |         |          |          |          |         |          |
| V9HWI3 | Cathepsin   | MQPSSLLP  | 39 | 13 | 309  | 13 | 412  | 44.5  | 6.54 | 15711.4  | 12359.9  | 11091.3 | 14318    | 17143.2  | 16500.5  | 14170.4 | 13018.8  |
| Q6PIK1 | IGL@ prote  | MAWALLLI  | 35 | 7  | 1010 | 1  | 235  | 24.8  | 7.71 | 6290.4   | 8731     | 5542.3  | 6796.3   | 6542     | 7580.1   | 7764.1  | 6906.4   |
| D6RF35 | Vitamin D-  | MKRVLVLL  | 53 | 23 | 262  | 23 | 476  | 53    | 5.52 | 17327.4  | 13533.7  | 24489.9 | 15861.2  | 15123.2  | 15500.5  | 16584.4 | 14294.4  |
| V9HWD8 | Epididymis  | MSMLVVF   | 33 | 12 | 342  | 12 | 495  | 54.2  | 5.86 | 21216.9  | 26602.6  | 21869.4 | 21043.9  | 20167.4  | 21694.9  | 31421   | 24056.7  |
| P02749 | Beta-2-glyc | MISPVLILF | 45 | 11 | 404  | 11 | 345  | 38.3  | 7.97 | 22534.1  | 19621.2  | 12893.6 | 20707.4  | 27931.5  | 20500.3  | 20266.6 | 26758.6  |
| D9ZGG2 | Vitronectin | MAPLRPLL  | 26 | 10 | 344  | 10 | 478  | 54.3  | 5.8  | 21742.7  | 22367.4  | 14848.5 | 24088.8  | 22575.8  | 22267.7  | 25547.6 | 21122.6  |
| Q5CZ94 | Putative ur | MAWTPLF   | 32 | 6  | 971  | 1  | 234  | 25    | 7.27 | 135.2    | 121.7    | 147.8   | 161.2    | 102.2    | 148.6    | 136.4   | 145.8    |
| Q6DHW4 | Uncharact   | MAGFPLLI  | 35 | 6  | 969  | 1  | 237  | 25.1  | 7.99 |          |          |         |          |          |          |         |          |
| B3KS79 | cDNA FLJ3   | MKIHYSRQ  | 30 | 13 | 289  | 13 | 448  | 50.6  | 5.63 | 13162.9  | 14201.8  | 12691.8 | 14632.2  | 14459.7  | 13588.8  | 22531.2 | 16211.1  |
| P07998 | Ribonuclea  | MALEKSLV  | 58 | 6  | 309  | 6  | 156  | 17.6  | 8.79 | 20596.6  | 20328.4  | 13152.6 | 21895.2  | 21754.4  | 19182.2  | 17946.9 | 25347.2  |
| C9JF17 | Apolipoproc | MFKQLSCIS | 33 | 8  | 1310 | 8  | 215  | 24.1  | 5.6  | 116695.1 | 109434.1 | 75109.3 | 109701.3 | 141500.2 | 116202.4 | 121145  | 125321.7 |
| Q8WZ75 | Roundabot   | MGSGGDS   | 14 | 10 | 196  | 10 | 1007 | 107.4 | 6.64 | 14015.7  | 12359.8  | 11027.9 | 13649.4  | 14279    | 16103.8  | 13958.1 | 13999.1  |
| M0R1F0 | Prostate-sp | XFLTLSVTV | 52 | 10 | 493  | 9  | 262  | 28.6  | 7.44 | 32571.8  | 40315.5  | 30526   | 26632.8  | 29508.2  | 16031.4  | 16496.1 | 34544.1  |
| Q6N030 | Uncharact   | MDWTWR    | 37 | 15 | 1075 | 6  | 518  | 57    | 8.05 | 5074.5   | 4738.1   | 5540.6  | 6024.4   | 6131     | 5122.6   | 7072.7  | 7211.3   |
| Q8NFZ8 | Cell adhesi | MGRARRFC  | 31 | 9  | 189  | 9  | 388  | 42.8  | 6.3  | 8883.2   | 8270.9   | 6499.1  | 9017.3   | 8820.9   | 9361.4   | 7196.8  | 9424.4   |
| B7Z9B1 | cDNA FLJ5   | MKTTPGAS  | 20 | 12 | 469  | 12 | 760  | 83.4  | 5.12 | 23981.7  | 26643.4  | 16251.4 | 25265.4  | 25342.3  | 24623.6  | 22206.7 | 28059.6  |
| O94919 | Endonucle   | MGTARWL   | 29 | 12 | 227  | 12 | 500  | 55    | 5.71 | 8326.9   | 11662    | 6551.2  | 8645.8   | 8894.1   | 8187     | 8210.1  | 9024.3   |
| P02753 | Retinol-bin | MKWVWA    | 61 | 10 | 470  | 10 | 201  | 23    | 6.07 | 28771.5  | 58084.3  | 20772.3 | 29296.9  | 33777.9  | 30653.1  | 22817.5 | 26946    |
| B7Z5V6 | cDNA FLJ5   | MGVRHPP   | 24 | 14 | 312  | 2  | 644  | 71.7  | 6.34 | 2519.2   | 1906.2   | 2285.5  | 1916.7   | 2317.2   | 2148.9   | 1547.7  | 2002.3   |
| E9PR17 | CD59 glycc  | MGIQGGSV  | 37 | 5  | 1278 | 5  | 130  | 14.5  | 7.77 | 90140.3  | 94116.1  | 66869   | 98283.8  | 104681.9 | 107610.9 | 86285.3 | 112175.1 |
| O00391 | Sulfhydryl  | MRRCSNGS  | 31 | 17 | 139  | 17 | 747  | 82.5  | 8.92 | 6795.3   | 6010     | 5442    | 6302.2   | 6408.7   | 6427.3   | 5843.9  | 5955.7   |
| P27487 | Dipeptidyl  | MKTPWKV   | 31 | 23 | 143  | 23 | 766  | 88.2  | 6.04 | 9130.5   | 8022.4   | 7844.8  | 9113.7   | 9502.2   | 8394.4   | 7506.1  | 8683.5   |
| H6VRG1 | Keratin 1 C | MRSQFSSR  | 34 | 20 | 161  | 16 | 645  | 66.1  | 8.12 | 9476     | 6231.3   | 7005    | 5944.3   | 7754.1   | 8608.7   | 8670.3  | 9226.5   |
| A8K335 | cDNA FLJ7   | MASPGRLL  | 35 | 12 | 311  | 12 | 318  | 36    | 7.42 | 17957    | 12883    | 11143.4 | 15620.3  | 18357.3  | 20282.1  | 15601.1 | 15333.5  |
| B7Z8Q2 | cDNA FLJ5   | MFAGCFFF  | 24 | 10 | 409  | 10 | 433  | 46.6  | 6.28 | 29115    | 47211    | 22248.8 | 32847    | 34937.8  | 31691.9  | 33256.5 | 31137.6  |
| B2R582 | cDNA, FLJ9  | MELWGAY   | 53 | 9  | 211  | 1  | 202  | 22.5  | 6.04 | 535      | 463.1    | 497.3   | 429.5    | 579.2    | 442.2    | 445.4   | 589      |
| B2R888 | Monocyte    | MERASCLL  | 35 | 12 | 411  | 12 | 375  | 40    | 6.23 | 19350.3  | 34324.4  | 13265.4 | 21759.3  | 24036.9  | 22120.8  | 31587.4 | 22517.1  |
| A8K3K1 | cDNA FLJ7   | MCDDEET   | 30 | 10 | 187  | 1  | 377  | 42    | 5.39 | 1376.3   | 972.4    | 929.4   | 1205.8   | 1637.7   | 1245.8   | 1169.5  | 1132.8   |
| B4E1Z4 | cDNA FLJ5   | MGPLMVL   | 18 | 17 | 125  | 3  | 1266 | 140.9 | 7.18 | 5327     | 7433.3   | 3756.4  | 4316     | 5048.3   | 4986.3   | 4293    | 4174.9   |
| A8K6Z6 | cDNA FLJ7   | MKPNIIFVL | 43 | 21 | 144  | 15 | 582  | 65.6  | 9.07 | 3808.1   | 4746.6   | 2950.2  | 13370.1  | 3415.1   | 3196.1   | 2643.1  | 2968.1   |
| D9YZU5 | Beta-globin | MVHLTPEE  | 78 | 10 | 328  | 1  | 147  | 16    | 7.28 | 44720.1  | 11673.8  | 7891.1  | 10959.3  | 20029.3  | 18593.9  | 20856.2 | 8175.3   |

|           |              |           |    |    |      |    |      |       |      |         |         |         |         |         |         |         |         |
|-----------|--------------|-----------|----|----|------|----|------|-------|------|---------|---------|---------|---------|---------|---------|---------|---------|
| O00468    | Agrin OS=H   | MAGRSHPO  | 15 | 22 | 122  | 21 | 2067 | 217.1 | 6.39 | 6556.5  | 9170.1  | 5380.9  | 6510.6  | 6654.7  | 6845.8  | 6884.2  | 6549.9  |
| E7ETHO    | Compleme     | MKLLHVFL  | 32 | 15 | 185  | 4  | 591  | 66.6  | 7.59 | 7030    | 6804.8  | 6327.9  | 6590.3  | 7519.4  | 7774.9  | 6675.9  | 7242.1  |
| AOA1B0GU  | Ig mu chain  | GSASAPTLF | 30 | 13 | 404  | 13 | 474  | 51.9  | 6.15 | 23674.6 | 25076.2 | 19022.9 | 23987   | 25065.2 | 30377.4 | 22344.8 | 20735.1 |
| B2RCQ6    | cDNA, FLJ9   | MPPVGGK   | 55 | 18 | 112  | 3  | 406  | 44.9  | 7.24 | 7840.2  | 5243.9  | 5523.3  | 5621.9  | 6657.2  | 6307    | 4825.4  | 5058.9  |
| B7ZKY6    | Membrane     | MGKSESQM  | 31 | 21 | 138  | 21 | 750  | 85.5  | 5.91 | 7337.4  | 6212    | 6066.5  | 6723.5  | 7573.8  | 6489.3  | 5345.8  | 6746.4  |
| AOA0E3XJU | E-cadherin   | MGPWSRS   | 17 | 14 | 408  | 13 | 882  | 97.3  | 4.7  | 23890.7 | 28629.9 | 19631.3 | 25363   | 24789.7 | 30539   | 31002.3 | 30186.4 |
| E7ET40    | Urokinase-   | MVFHLRTR  | 35 | 13 | 190  | 13 | 414  | 46.9  | 8.44 | 10043   | 10868   | 7972    | 9409.9  | 10646.9 | 10681.4 | 9738.5  | 8753.8  |
| A8K6V6    | N-acetylglu  | MRLPLAP   | 25 | 13 | 292  | 13 | 552  | 62.1  | 8.4  | 14130.6 | 14474.9 | 9677.9  | 15612.1 | 14594.5 | 14408.2 | 14409.1 | 14806.6 |
| V9HW22    | Epididymis   | MSKGPAVC  | 32 | 18 | 122  | 13 | 646  | 70.9  | 5.52 | 6176.3  | 4915.2  | 4402.9  | 5382.5  | 5784.9  | 5413.1  | 5273.7  | 5169.2  |
| P28799    | Granulins (  | MWTLVSW   | 19 | 7  | 209  | 7  | 593  | 63.5  | 6.83 | 13200.6 | 8566.9  | 8117.2  | 10492.5 | 10470.4 | 10819.4 | 9760.5  | 8962.9  |
| BOYJC6    | Vitamin K-   | MAGCVPLI  | 33 | 13 | 247  | 13 | 421  | 46.9  | 6.04 | 18393.1 | 16104.7 | 13385.9 | 18155.4 | 15686.5 | 19476.2 | 15480.4 | 16253.9 |
| A2KBC4    | Anti-TN-C s  | EVQLLESGC | 43 | 7  | 240  | 2  | 238  | 25.1  | 8.41 | 5443.3  | 4535.9  | 4904.6  | 5186.3  | 5280.6  | 5058.7  | 5224.3  | 4996.3  |
| P78492    | Inter-alpha  | LWAFDAVF  | 75 | 3  | 1658 | 1  | 51   | 5.7   | 4.89 | 676.4   | 874.5   | 417.2   | 801.5   | 703.3   | 628.9   | 910.5   | 820     |
| Q7Z3B1    | Neuronal g   | MDMMLLV   | 42 | 11 | 177  | 11 | 354  | 38.7  | 6.21 | 4784.5  | 5127    | 3566.5  | 5021.4  | 5158.7  | 5011.7  | 4610.3  | 5405.1  |
| S6BAR0    | IgG L chain  | MAWTPLF   | 31 | 6  | 1319 | 2  | 216  | 23.1  | 7.69 | 1661.8  | 2367.8  | 1268.6  | 1681.7  | 1674.3  | 3364.4  | 2416    | 1988.2  |
| P13645    | Keratin, ty  | MSVRYSSS  | 31 | 18 | 186  | 13 | 584  | 58.8  | 5.21 | 11061.6 | 7528.5  | 9154.3  | 7392.4  | 10137.9 | 11772.1 | 10809.6 | 11461.9 |
| Q9Y6R7    | IgG Fc-bind  | MGALWSV   | 11 | 24 | 90   | 24 | 5405 | 571.6 | 5.34 | 4069    | 3160.2  | 2487.8  | 2981.7  | 5357.1  | 2513.9  | 3199    | 4182.5  |
| AOA024QZ  | Prosaposin   | MYALFLLA  | 27 | 14 | 579  | 14 | 524  | 58.1  | 5.17 | 51916   | 36858   | 28343.4 | 40853.7 | 45275.1 | 43156.2 | 50370.4 | 44266.4 |
| P06870    | Kallikrein-1 | MWFLVLCI  | 23 | 6  | 493  | 6  | 262  | 28.9  | 4.83 | 29532.8 | 26696.4 | 24544.6 | 30067.2 | 37889.1 | 27163.4 | 19938.5 | 31904.2 |
| AOA024R9  | Serpin pep   | MYSNVIGT  | 36 | 16 | 193  | 16 | 464  | 52.6  | 6.71 | 7926.4  | 9396.9  | 10940.4 | 6630.6  | 6582.5  | 6966.3  | 7629.3  | 6197    |
| AOA024R2  | C-type lect  | MELWGAY   | 53 | 9  | 191  | 1  | 202  | 22.5  | 5.67 | 9181.9  | 7965.2  | 7486.8  | 8543.1  | 10248.6 | 8645.4  | 8053.7  | 10624.9 |
| B2RBF5    | cDNA, FLJ9   | MSRPQLRF  | 32 | 10 | 163  | 10 | 385  | 43.8  | 6.64 | 9872.2  | 10090.3 | 7463.7  | 10399.1 | 9454    | 10323.2 | 10729.7 | 9972.7  |
| X6R868    | Bile salt-ac | MLTMGRU   | 23 | 16 | 161  | 16 | 756  | 79.6  | 5.34 | 13296.1 | 8155.6  | 9041.5  | 11132.9 | 10893.4 | 13786.7 | 8731.9  | 10342.8 |
| AOA087WV  | Tenascin-X   | MMPAQYA   | 17 | 20 | 86   | 1  | 1545 | 165.4 | 6.02 |         |         |         |         |         |         |         |         |
| Q15828    | Cystatin-M   | MARSNLPL  | 50 | 5  | 278  | 5  | 149  | 16.5  | 8.09 | 7456    | 14974.4 | 6224.4  | 8778.4  | 8816.8  | 8199.9  | 6846.3  | 7481.9  |
| Q5FWF9    | IGL@ protc   | MAWTPLLI  | 42 | 8  | 690  | 3  | 232  | 24.8  | 5.59 | 2832.6  | 5027.3  | 2277.8  | 3809.7  | 3261.9  | 3448.2  | 3768.6  | 3111.9  |
| P22792    | Carboxype    | MLPGAWL   | 22 | 11 | 195  | 11 | 545  | 60.5  | 5.99 | 8418.9  | 7375.9  | 6103.8  | 8306.7  | 10519.2 | 10166.9 | 8366.4  | 9129.5  |
| B4DJQ8    | cDNA FLJ5    | MGAGPSCI  | 34 | 14 | 177  | 14 | 446  | 50.1  | 6.99 | 9491.6  | 7696.2  | 7051.4  | 8465    | 9227.7  | 8902.9  | 7872.9  | 7815.2  |
| E7ETN3    | Uncharacte   | MGPLMVL   | 17 | 15 | 92   | 1  | 1115 | 123.9 | 6.8  | 47.1    | 42.5    | 34.2    | 44.4    | 44.1    | 47.4    | 62.1    | 56.9    |
| O75594    | Peptidogly   | MSRRSMLI  | 45 | 6  | 227  | 6  | 196  | 21.7  | 8.59 | 11315.7 | 10968.1 | 8389.1  | 10397.2 | 11176.1 | 10271.8 | 9934.7  | 10051.6 |
| P60174    | Triosephos   | MAEDGEEA  | 59 | 15 | 89   | 15 | 286  | 30.8  | 5.92 | 6322.4  | 4996.5  | 3888.3  | 5335.4  | 6184.5  | 5511.8  | 5547.9  | 5034.8  |
| AOA075B6  | Ig lambda-   | XQPKAAPS  | 48 | 4  | 1262 | 1  | 106  | 11.3  | 8.29 | 134.1   | 314.6   | 119.4   | 195.9   | 191.2   | 150.6   | 249.4   | 126.3   |
| P24855    | Deoxyribor   | MRGMKLL   | 23 | 5  | 348  | 5  | 282  | 31.4  | 4.91 | 19120.1 | 10550.1 | 14451.1 | 18482.7 | 19902.9 | 20304.1 | 14070.1 | 19469.6 |
| A8K2P8    | cDNA FLJ7    | MEAARPSC  | 17 | 14 | 99   | 14 | 901  | 99.9  | 5.34 | 4005.2  | 4797.7  | 3005.9  | 4284.3  | 4544.7  | 4309.2  | 4329.2  | 4611.3  |
| Q6LAM1    | Heavy chai   | KVTYTSQEI | 45 | 12 | 123  | 1  | 321  | 35.9  | 7.59 | 264     | 172.8   | 174.9   | 218.4   | 264.4   | 229.1   | 317     | 272.9   |
| D9IAI1    | Epididymis   | MPVDLSKV  | 80 | 11 | 193  | 11 | 187  | 21    | 7.53 | 10704.4 | 8666.2  | 8083.9  | 9207.2  | 11407.9 | 9249.3  | 8762.1  | 10023.5 |
| A8K7G6    | cDNA FLJ7    | MAQTSSYF  | 55 | 9  | 294  | 7  | 166  | 18.7  | 5.53 | 20747.4 | 67081.8 | 15740.4 | 21956.8 | 29098.7 | 25074.5 | 21249.8 | 24072.4 |
| AOA024R3  | Apolipoproc  | MKAAVLTL  | 60 | 16 | 172  | 16 | 267  | 30.8  | 5.76 | 14099.8 | 8339.7  | 10752.4 | 7017    | 6795.4  | 13017.8 | 9385.9  | 5583.4  |
| AOA0K0K1  | Cystatin O   | MAGPLRAF  | 37 | 6  | 302  | 6  | 146  | 15.8  | 8.75 | 23609.1 | 20362.2 | 17781   | 20549.9 | 25344.5 | 22440.5 | 20095   | 22034.6 |
| P06733    | Alpha-enol   | MSILKIHF  | 39 | 15 | 140  | 15 | 434  | 47.1  | 7.39 | 9197.9  | 7512.7  | 6104.5  | 7530.6  | 9779.6  | 8699.9  | 8416.6  | 7328.1  |
| AOA024R0  | Matrix-ren   | MALPSRILL | 33 | 14 | 184  | 14 | 450  | 49.7  | 6.92 | 14135.6 | 13360.5 | 9861.6  | 13081.8 | 14067.5 | 13527.6 | 14201.3 | 13392.9 |

|          |              |           |    |    |     |    |      |       |      |         |         |         |         |         |         |         |         |
|----------|--------------|-----------|----|----|-----|----|------|-------|------|---------|---------|---------|---------|---------|---------|---------|---------|
| P19652   | Alpha-1-ac   | MALSWVL   | 47 | 8  | 469 | 6  | 201  | 23.6  | 5.11 | 28760.9 | 42980.5 | 28097.3 | 30432.2 | 25362.8 | 22890.2 | 54229.9 | 32592.2 |
| Q7Z379   | Putative ur  | KHLWFFLL  | 33 | 11 | 357 | 3  | 478  | 51.6  | 6.52 | 2416.1  | 1625.7  | 1794.5  | 2023.5  | 1993    | 2266    | 2332.7  | 2134.7  |
| BOBCY7   | Glutamyl a   | MNFAEREC  | 21 | 20 | 145 | 20 | 957  | 109.2 | 5.47 | 6396.6  | 4871    | 4526.1  | 7544.2  | 7169.7  | 6138.2  | 6823.2  | 6108.5  |
| A0A125QY | GCT-A9 lig   | DIQMTQSF  | 32 | 2  | 172 | 1  | 107  | 11.6  | 4.65 | 2491.2  | 3158.7  | 1686.8  | 3206.8  | 2375.6  | 2437.5  | 3373.3  | 2485.4  |
| P02649   | Apolipoprc   | MKVLWAA   | 48 | 15 | 106 | 15 | 317  | 36.1  | 5.73 | 6715.5  | 5542.8  | 4969    | 5478    | 6541.8  | 6263.6  | 5132.9  | 4851    |
| P11117   | Lysosomal    | MAGKRSG   | 29 | 12 | 195 | 12 | 423  | 48.3  | 6.74 | 11102.1 | 8212.2  | 7771.6  | 9738.9  | 9839.5  | 11705   | 8307.8  | 9940.3  |
| P06727   | Apolipoprc   | MFLKAVVL  | 54 | 21 | 120 | 21 | 396  | 45.4  | 5.38 | 8194    | 8534.3  | 6329.7  | 5770.7  | 6111.2  | 7110.2  | 6475    | 5285.4  |
| O76076   | WNT1-indu    | MRGTPKTH  | 36 | 6  | 81  | 6  | 250  | 26.8  | 7.88 | 2354.8  | 2240.5  | 1497.1  | 2188.9  | 2228.2  | 1983    | 1876.3  | 2026.8  |
| Q14508   | WAP four-    | MPACRLGF  | 61 | 4  | 231 | 4  | 124  | 13    | 4.84 | 12289.6 | 10492.9 | 8609.3  | 12185.4 | 13100.8 | 13006.5 | 15482.9 | 13168.2 |
| P04083   | Annexin A1   | MAMVSEF   | 51 | 16 | 132 | 16 | 346  | 38.7  | 7.02 | 3502.7  | 3667.8  | 2825.3  | 5595.3  | 4147.6  | 4064.7  | 5350.8  | 3672    |
| Q9UNN8   | Endothelia   | MLTLLPIL  | 29 | 6  | 386 | 6  | 238  | 26.7  | 7.18 | 19919.3 | 17402.5 | 15700   | 21225.8 | 18474.6 | 20438.6 | 21937.6 | 21715.2 |
| P18065   | Insulin-like | MLPRVGC   | 49 | 12 | 145 | 12 | 325  | 34.8  | 7.5  | 6669.4  | 6714.4  | 5207    | 5987.2  | 6522.1  | 7067.8  | 6039.7  | 5620.8  |
| P14543   | Nidogen-1    | MLASSSRIF | 10 | 12 | 141 | 2  | 1247 | 136.3 | 5.29 | 6662.7  | 6247.1  | 6194.6  | 6379.3  | 6386.4  | 6458    | 6279.2  | 6487.1  |
| Q7Z5L0   | Vitelline m  | MERGAGA   | 40 | 5  | 427 | 5  | 202  | 21.5  | 5.07 | 14838   | 11073.3 | 10759.1 | 11735   | 12882.7 | 15612.3 | 14948.9 | 14878.8 |
| B4DM05   | cDNA FLJ5    | MLASSSRIF | 17 | 12 | 155 | 2  | 726  | 79.3  | 4.97 | 3373.5  | 3211.1  | 1987.1  | 3039.5  | 3779.5  | 3380.4  | 2472.9  | 3873.7  |
| P02671   | Fibrinogen   | MFSMRIVC  | 17 | 12 | 100 | 12 | 866  | 94.9  | 6.01 | 4743    | 3637.4  | 2688.6  | 4047.4  | 4198.3  | 4620.4  | 5013.4  | 4234.1  |
| A0A024R5 | Arylsulfata  | MSMGAPR   | 25 | 8  | 154 | 8  | 509  | 53.8  | 6.07 | 5705.9  | 4819.6  | 3916.7  | 5213.7  | 4961.3  | 5588.7  | 4636.9  | 4624.8  |
| B4DNW0   | cDNA FLJ6    | MWGCQAI   | 33 | 14 | 98  | 14 | 498  | 56    | 7.03 | 6735    | 4362.2  | 4447.6  | 4353.5  | 5904.8  | 6104.6  | 4342.9  | 4646.2  |
| P16870   | Carboxype    | MAGRGG    | 31 | 15 | 130 | 15 | 476  | 53.1  | 5.14 | 6963.6  | 8192.7  | 6190.8  | 6365.7  | 7394.1  | 5195.9  | 4811.7  | 6000.8  |
| P08582   | Melanotra    | MRGPSGAI  | 33 | 19 | 77  | 19 | 738  | 80.2  | 5.94 | 3034    | 2998.4  | 2663.6  | 3365    | 3292.2  | 2782.2  | 2661    | 3211.1  |
| Q99715   | Collagen al  | MRSRLPPA  | 6  | 13 | 95  | 13 | 3063 | 332.9 | 5.53 | 5615.7  | 4543.5  | 4483    | 5307.4  | 5506.9  | 5496.1  | 5446.3  | 5685.6  |
| P08294   | Extracellul  | MLALLCSC  | 37 | 7  | 177 | 7  | 240  | 25.8  | 6.61 | 6185.7  | 6487.6  | 5858.6  | 6718.8  | 7256.2  | 7641.9  | 6378.4  | 7946.4  |
| Q6EMK4   | Vasorin OS   | MCSRVP    | 15 | 9  | 222 | 9  | 673  | 71.7  | 7.39 | 13637.6 | 11660.9 | 11262.7 | 12179.6 | 13908.9 | 12904.8 | 11381.6 | 11193   |
| P21333   | Filamin-A C  | MSSSHSRA  | 8  | 15 | 78  | 15 | 2647 | 280.6 | 6.06 | 3358.3  | 3156.8  | 2544.4  | 3219.8  | 3486    | 3310    | 3494.3  | 3522    |
| A0A0X9UV | GCT-A5 lig   | DIVMTQSP  | 54 | 5  | 236 | 2  | 113  | 12.5  | 6.58 | 8308.8  | 11073.3 | 6619.9  | 9396.4  | 8991.8  | 10450.5 | 11201.3 | 10309.4 |
| P02750   | Leucine-ric  | MSSWSRQ   | 28 | 9  | 294 | 9  | 347  | 38.2  | 6.95 | 12613   | 24606.6 | 10453.9 | 15722.9 | 13511   | 13859.2 | 35646.8 | 19100   |
| P19440   | Gamma-gli    | MKKKLVVL  | 22 | 11 | 138 | 11 | 569  | 61.4  | 7.12 | 6381.6  | 5268.6  | 4712    | 5852.7  | 6820.6  | 7100.7  | 4533.4  | 5953.7  |
| P30530   | Tyrosine-p   | MAWRCPR   | 10 | 7  | 212 | 7  | 894  | 98.3  | 5.43 | 8354.3  | 8598.2  | 6514.2  | 8759.5  | 8655.7  | 8945.3  | 8113.3  | 8678.5  |
| O00187   | Mannan-bi    | MRLTLLG   | 10 | 7  | 556 | 7  | 686  | 75.7  | 5.63 | 28174.7 | 31325.3 | 20703.3 | 27106.5 | 28729   | 32659.2 | 37673   | 29491.9 |
| Q9NZP8   | Compleme     | MPGPRVW   | 25 | 10 | 81  | 2  | 487  | 53.5  | 7.2  | 4612    | 4221.7  | 3471    | 4781.8  | 5028.8  | 4536.8  | 5447.1  | 4947.3  |
| Q96FE7   | Phosphoin    | MLLAWVQ   | 21 | 5  | 638 | 5  | 263  | 28.2  | 5.01 | 48791.1 | 50194.9 | 33426.8 | 56833.1 | 56993.2 | 54600.6 | 45056   | 60639.2 |
| Q4TZM4   | Hemoglobi    | TPEEKSAV  | 89 | 8  | 135 | 2  | 101  | 11    | 6.52 | 799.4   | 200.7   | 152.1   | 169.2   | 391.1   | 392.4   | 398.7   | 134.5   |
| P16070   | CD44 antig   | MDKFWW    | 9  | 6  | 582 | 6  | 742  | 81.5  | 5.33 | 46121.7 | 44805.3 | 32947.2 | 52623.7 | 52530   | 56809.7 | 50556.8 | 61721.5 |
| Q96PD5   | N-acetylm    | MAQGVLV   | 23 | 9  | 99  | 9  | 576  | 62.2  | 7.55 | 6845.7  | 4899.5  | 4304.9  | 6124.7  | 4679    | 4731.7  | 5866.3  | 4574.7  |
| Q59EQ1   | Cadherin 1   | PKMKENYC  | 25 | 14 | 92  | 14 | 798  | 88.1  | 4.93 | 5392.5  | 6145.5  | 4164.8  | 5892.6  | 5570.7  | 5926.4  | 6746.7  | 6154.1  |
| Q59EJ3   | Heat shock   | LRSCDSPL  | 24 | 15 | 85  | 11 | 709  | 77.4  | 6.3  | 1688.7  | 1313.5  | 1123    | 1448.6  | 1430.5  | 1427.3  | 1312.5  | 1260.2  |
| B4DPF0   | cDNA FLJ5    | MPPVGGK   | 53 | 16 | 75  | 1  | 365  | 40.5  | 6.93 |         |         |         |         |         |         |         |         |
| H7BY55   | Compleme     | MTVARPSV  | 24 | 12 | 331 | 12 | 550  | 58.9  | 8.78 | 16870.9 | 18960.2 | 11991   | 17699.9 | 18951.4 | 18436.9 | 20402.1 | 23131.9 |
| A0A024R5 | Folate rece  | MAQRMTT   | 31 | 7  | 206 | 7  | 257  | 29.8  | 7.97 | 11850.3 | 12237.3 | 8645.7  | 12932.5 | 13761.3 | 12888.9 | 10740.6 | 13354.9 |
| Q96RW7   | Hemicentir   | MISWEVVF  | 2  | 6  | 115 | 6  | 5635 | 613   | 6.49 | 4630.5  | 4397.2  | 3690.3  | 4410.4  | 4345.8  | 4438.6  | 3645.6  | 4413.3  |
| Q4LE33   | TNC varian   | SLLCASKSP | 7  | 13 | 71  | 13 | 2233 | 244.2 | 4.94 | 5995.7  | 4917.8  | 4043.6  | 5283.6  | 5542.5  | 5062    | 5917.9  | 5727.9  |

|           |              |           |    |    |     |    |      |       |      |         |         |         |         |         |         |         |         |
|-----------|--------------|-----------|----|----|-----|----|------|-------|------|---------|---------|---------|---------|---------|---------|---------|---------|
| P00558    | Phosphogl    | MSLSNKLT  | 39 | 14 | 75  | 14 | 417  | 44.6  | 8.1  | 3378.6  | 2678.5  | 2414.9  | 2926.4  | 3242.2  | 3386    | 2793.2  | 2517    |
| P05543    | Thyroxine-   | MSPFLYLVI | 31 | 13 | 123 | 13 | 415  | 46.3  | 6.3  | 8329.4  | 6472.1  | 7373.6  | 8439.7  | 11253.1 | 10374.4 | 12476.3 | 10225   |
| D3DQU2    | Tripeptidyl  | MTADPRKC  | 20 | 8  | 82  | 8  | 572  | 62.2  | 6.65 | 4449.1  | 3953.4  | 3176.4  | 3856.9  | 3914.5  | 5232.1  | 3194.9  | 3143.2  |
| Q59EP1    | Annexin (F   | VKDLTMSY  | 35 | 15 | 108 | 15 | 510  | 54.9  | 7.27 | 5871.8  | 5467.6  | 4177.8  | 5309.7  | 6345.5  | 5208    | 5078.5  | 4902.7  |
| P33908    | Mannosyl-    | MPVGGLLF  | 24 | 15 | 104 | 15 | 653  | 72.9  | 6.47 | 4720.8  | 4095.7  | 3316.8  | 4006.9  | 4866.9  | 4740.6  | 3971.6  | 4125.6  |
| B7ZW00    | COL6A3 pr    | MRKHRHLI  | 6  | 14 | 120 | 1  | 2570 | 278   | 8.15 | 764     | 902.1   | 576.2   | 961.7   | 1286.6  | 832.8   | 1001.7  | 862.7   |
| P60022    | Beta-defer   | MRTSYLLLF | 34 | 1  | 111 | 1  | 68   | 7.4   | 8.6  | 5318.3  | 7551.5  | 5017.4  | 6151.3  | 4069.6  | 8211.8  | 7714.7  | 5562.9  |
| Q9UL78    | Myosin-re    | EIVLTQSPG | 60 | 4  | 325 | 1  | 109  | 11.6  | 8.29 | 5435.1  | 5646.1  | 4489.4  | 5065.1  | 5431.4  | 6108.6  | 5699.8  | 5804.5  |
| S6BGE0    | IgG H chair  | MEFGLSWV  | 30 | 6  | 284 | 0  | 300  | 32.2  | 7.85 | 619.1   | 614.4   | 644.3   | 620.3   | 634.2   | 631.1   | 726.6   | 665     |
| Q9HCU0    | Endosialin   | MLLRLLAV  | 23 | 13 | 182 | 13 | 757  | 80.8  | 5.35 | 12401.7 | 10911.9 | 9069.8  | 13278.6 | 13421.9 | 12460.9 | 10600.7 | 13413   |
| A0A1K0GX  | Globin C1 (  | MSAARPGV  | 50 | 6  | 182 | 6  | 177  | 19.2  | 9.77 | 29618.2 | 9508.2  | 7413.2  | 8253.1  | 15153   | 13904.8 | 15770.1 | 6799.3  |
| P43121    | Cell surfac  | MGLPRLVC  | 22 | 11 | 69  | 11 | 646  | 71.6  | 5.76 | 3270    | 3254.3  | 2493.3  | 3249.6  | 3281.8  | 3803.3  | 3274.2  | 3485.7  |
| A0A075B6  | Ig alpha-2   | ASPTSPKVF | 39 | 10 | 295 | 3  | 340  | 36.6  | 6.27 | 692.8   | 593.2   | 599.1   | 790.1   | 732.1   | 521.6   | 551.7   | 590.3   |
| Q96NY8    | Nectin-4 O   | MPLSLGAE  | 25 | 10 | 86  | 10 | 510  | 55.4  | 5.38 | 4708.4  | 3999.8  | 3850    | 4385.7  | 4907.4  | 5536.9  | 4613.6  | 4612.5  |
| A0A024RD  | SPARC-like   | MKTGLFFL  | 30 | 15 | 76  | 15 | 664  | 75.2  | 4.81 | 3793.8  | 4046.1  | 3261.7  | 3774.7  | 4534    | 3652.7  | 3736.7  | 3687.9  |
| G3V4U0    | Fibulin-5 O  | MRSNGNCR  | 18 | 7  | 111 | 5  | 453  | 50.8  | 4.77 | 5074.9  | 4457.3  | 3773.5  | 4585.5  | 5020.6  | 4681    | 4490.6  | 4667.9  |
| A0A0A1TT  | Lutheran b   | MEPPDAPA  | 29 | 14 | 78  | 14 | 628  | 67.3  | 5.81 | 4202.2  | 3335.2  | 3038.3  | 3613.9  | 3773.6  | 3867.2  | 3478    | 3736.7  |
| X6R8A1    | Carboxype    | MTSSPRAP  | 20 | 9  | 131 | 9  | 498  | 56.2  | 6.61 | 9108.3  | 4903.2  | 5425.3  | 7045.1  | 7273.7  | 8585.6  | 6819.7  | 5613.9  |
| P19320    | Vascular ce  | MPGKMVV   | 18 | 12 | 99  | 12 | 739  | 81.2  | 5.22 | 4789.2  | 7333.7  | 4646.3  | 4838.7  | 4779.5  | 4553.1  | 5918.9  | 4993.5  |
| A0A024RO  | Macrophag    | MTAPGAAV  | 21 | 10 | 138 | 6  | 554  | 60.1  | 5.29 | 6218.2  | 6126.4  | 4574    | 6227    | 6485.1  | 6718.1  | 7291.7  | 7324.9  |
| P12111    | Collagen al  | MRKHRHLI  | 5  | 14 | 113 | 1  | 3177 | 343.5 | 6.68 | 7415.6  | 7912.6  | 5452.6  | 7785.7  | 8009.2  | 7299.1  | 7169.4  | 7162.4  |
| Q6UX06    | Olfactome    | MRPGLSFL  | 21 | 10 | 125 | 10 | 510  | 57.2  | 5.69 | 5003.2  | 4025.9  | 3660.8  | 4811.1  | 9592.3  | 4072.6  | 4205.4  | 6418.7  |
| A8K2T4    | cDNA FLJ7    | MKVISLFI  | 13 | 10 | 107 | 10 | 843  | 93.3  | 6.51 | 7452.5  | 7214.7  | 5493.9  | 7679.1  | 7694    | 8065.7  | 7781.9  | 7732.9  |
| A0A024RC  | Cadherin 2   | MCRIAGAL  | 12 | 7  | 145 | 7  | 906  | 99.7  | 4.81 | 4051.2  | 3790    | 2964.5  | 4320.6  | 4196.5  | 4337.4  | 4671    | 4857.4  |
| P51884    | Lumican O    | MSLSAFTL  | 36 | 11 | 162 | 11 | 338  | 38.4  | 6.61 | 7642.1  | 10154.5 | 6257    | 8331.2  | 9397.3  | 8790.4  | 8770.9  | 7967.7  |
| Q9BYE9    | Cadherin-r   | MAQLWLS   | 12 | 14 | 86  | 14 | 1310 | 141.5 | 4.5  | 3781.4  | 3640    | 3191.5  | 3753.9  | 3913.1  | 3706.3  | 3380.4  | 3705.1  |
| Q9UKU9    | Angiopoi     | MRPLCVTC  | 23 | 11 | 129 | 11 | 493  | 57.1  | 7.53 | 7634.6  | 4390.3  | 6199.6  | 7477.6  | 6215.8  | 10462.1 | 5680    | 6197.8  |
| P04406    | Glyceralde   | MGKVKVG   | 30 | 9  | 84  | 9  | 335  | 36    | 8.46 | 4985.1  | 4364.4  | 3597.4  | 4289.4  | 5148.7  | 5397.6  | 4728.8  | 4050.2  |
| A4D2D2    | Procollage   | MLPAATAS  | 18 | 6  | 92  | 6  | 449  | 47.9  | 7.43 | 2648.9  | 2896.3  | 2079.8  | 2789.7  | 2935    | 2604.4  | 2635.7  | 2776.7  |
| Q9BXP8    | Pappalysin   | MMCLKILR  | 12 | 17 | 76  | 17 | 1791 | 198.4 | 5.47 | 3162.2  | 2628.6  | 2362.7  | 2984.5  | 3081.3  | 3160.9  | 2770.2  | 2528.1  |
| P01591    | Immunogl     | MKNHLLFV  | 42 | 6  | 301 | 6  | 159  | 18.1  | 5.24 | 21643   | 17461.8 | 13951.6 | 20737.8 | 23622.7 | 19619.8 | 18930   | 22042.9 |
| A0A024R3  | Cathepsin    | MWQLWA    | 27 | 7  | 172 | 7  | 339  | 37.8  | 6.3  | 11295   | 8769    | 7231.1  | 13199.4 | 12385.8 | 11797   | 8858.7  | 9181.8  |
| B4DVA7    | Beta-hexos   | MTSSRLWF  | 27 | 14 | 112 | 13 | 540  | 62    | 5.26 | 5384.5  | 3289.8  | 3831.4  | 4917.7  | 6053.1  | 5639.6  | 4600.1  | 4755.1  |
| Q03403    | Trefoil fact | MGRRDAQ   | 28 | 4  | 119 | 4  | 129  | 14.3  | 5.81 | 8058.9  | 7228.5  | 7331.7  | 7912    | 8480.1  | 10380.9 | 7841.1  | 7971.6  |
| A0A140VJC | Testicular t | MLPGLALL  | 20 | 12 | 88  | 12 | 770  | 86.9  | 4.82 | 6109.1  | 5411.3  | 4451.7  | 5954.7  | 6067.9  | 5151.7  | 5195    | 6176.6  |
| Q969P0    | Immunogl     | MGALRPTL  | 14 | 7  | 120 | 7  | 613  | 65    | 8    | 5478.2  | 5763.1  | 4520.6  | 5536.4  | 6001.2  | 6068.8  | 5037.5  | 5559.5  |
| Q96SA9    | Anti-strept  | DIQMTQSF  | 49 | 3  | 130 | 1  | 107  | 11.5  | 8.85 | 59      | 62.1    | 34.4    | 54.8    | 59.8    | 60.9    | 70      | 56.4    |
| A0N071    | Delta globi  | MVHLTPEE  | 41 | 6  | 228 | 1  | 147  | 16    | 8.05 |         |         |         |         |         |         |         |         |
| A0A024R9  | Plasma glu   | MKFLIFAFF | 25 | 9  | 105 | 9  | 472  | 51.9  | 6.18 | 5450.1  | 4178.2  | 3922.2  | 4977.5  | 5938.4  | 6070.9  | 4969.1  | 4634    |
| P43251    | Biotinidase  | MAHAHIQC  | 18 | 8  | 76  | 8  | 543  | 61.1  | 6.25 | 4007.9  | 3433.6  | 3371.9  | 3544.7  | 3927.9  | 3892.8  | 3499.8  | 3739    |
| D3DPK5    | SH3 domai    | KQLKPSKAI | 14 | 5  | 147 | 5  | 257  | 26.8  | 8.38 | 7301.7  | 9659    | 5353    | 8906.8  | 8228.3  | 9216.4  | 7713.3  | 8402.9  |

|          |              |           |    |    |     |    |      |       |      |         |        |        |        |         |         |        |         |
|----------|--------------|-----------|----|----|-----|----|------|-------|------|---------|--------|--------|--------|---------|---------|--------|---------|
| Q14767   | Latent-trar  | MRPRTKAF  | 4  | 6  | 32  | 6  | 1821 | 194.9 | 5.19 | 2487.2  | 2812.7 | 1639.6 | 2847.3 | 2505.4  | 2936.5  | 2437.9 | 2717.6  |
| Q92956   | Tumor nec    | MEPPGDW   | 19 | 3  | 51  | 3  | 283  | 30.4  | 7.15 | 2459.8  | 1976.6 | 1927.6 | 2293.4 | 2205.1  | 1971.1  | 2168   | 2257.6  |
| A0A087WV | Mucin-1 O    | MTPGTQSF  | 6  | 6  | 145 | 6  | 1262 | 122.9 | 7.56 | 7146.2  | 6532   | 5873.5 | 7307.5 | 8981    | 7333.4  | 6572.8 | 8057.4  |
| P07195   | L-lactate d  | MATLKEKL  | 30 | 9  | 126 | 8  | 334  | 36.6  | 6.05 | 10143.2 | 7229.1 | 6568.5 | 8089.9 | 11867.5 | 9207.9  | 7653   | 7645.5  |
| A2MYE1   | A30 (Fragr   | DIQMTQSF  | 47 | 3  | 116 | 1  | 96   | 10.4  | 8.5  | 4420.3  | 5418.3 | 5346.5 | 4195.9 | 4712.5  | 4510.6  | 5181.3 | 4963.5  |
| Q4W4Y1   | Dopamine     | MATFISVQ  | 26 | 22 | 55  | 22 | 868  | 96    | 6.52 | 2555.9  | 2251.8 | 2095.3 | 2399   | 2771.2  | 2422.2  | 1895.2 | 2352.5  |
| D3DSQ1   | N-acylsphii  | MNCCIGLG  | 22 | 13 | 115 | 7  | 546  | 60.6  | 8.81 | 5411    | 4681.5 | 3678.5 | 5312.2 | 5482.3  | 4348    | 4323.6 | 4530.2  |
| A1A4E9   | Keratin 13   | MSLRLQSS  | 25 | 14 | 107 | 9  | 458  | 49.6  | 4.96 | 6278.1  | 2943.1 | 3674.5 | 2963.2 | 3484.1  | 5475.3  | 6283.7 | 3225.2  |
| P07996   | Thrombosf    | MGLAWGL   | 11 | 10 | 75  | 1  | 1170 | 129.3 | 4.94 | 829.5   | 950.9  | 603    | 949.9  | 973.4   | 1055    | 955.2  | 862.4   |
| Q07507   | Dermatop     | MDLSLLWV  | 38 | 6  | 124 | 6  | 201  | 24    | 4.82 | 7663.8  | 8305.1 | 5661.8 | 7674.5 | 8157    | 8296    | 6186.1 | 7932.2  |
| O43278   | Kunitz-type  | MAPARTM   | 30 | 16 | 65  | 16 | 529  | 58.4  | 6.29 | 2618.5  | 2388.3 | 1943.2 | 2441.5 | 2672.2  | 2229.9  | 2272.6 | 2534.5  |
| B2RCM5   | cDNA, FLJ9   | MLPCASCL  | 20 | 7  | 70  | 7  | 443  | 49.3  | 4.94 | 2778.8  | 2565.7 | 2057.3 | 2724.9 | 2740.7  | 2594.7  | 2391.2 | 2574.2  |
| B2R815   | cDNA, FLJ9   | MHLIDYLLI | 28 | 12 | 77  | 12 | 427  | 48.5  | 7.75 | 3952.5  | 3292.2 | 2683.9 | 3455.1 | 3860.7  | 4139.3  | 3346.8 | 3411.3  |
| Q9UL83   | Myosin-rec   | EIVMTQSP  | 36 | 2  | 58  | 1  | 108  | 11.8  | 8.68 | 1858.1  | 1701.5 | 1872.9 | 1877.1 | 1697.8  | 1765.9  | 1933.1 | 1795.6  |
| B2R9F2   | cDNA, FLJ9   | MPLLLYTCI | 23 | 8  | 127 | 8  | 405  | 45.1  | 6.04 | 6586.5  | 6752   | 6012.8 | 6470.5 | 6705.7  | 6742.9  | 7251.2 | 6301.6  |
| Q65ZC9   | Single-chai  | QVQLVQSC  | 25 | 5  | 97  | 2  | 240  | 25.6  | 9.11 | 3911.8  | 3290.7 | 3307.4 | 3863.8 | 3751.6  | 3579.6  | 3859.5 | 3455.5  |
| B2R6J2   | cDNA, FLJ9   | MPKPINVR  | 26 | 18 | 97  | 10 | 586  | 69.4  | 6.27 | 4918.4  | 4153.1 | 3316.6 | 4704.9 | 5856.9  | 5435.1  | 4215.5 | 4708.4  |
| Q6UVK1   | Chondroiti   | MQSGPRPI  | 5  | 9  | 75  | 9  | 2322 | 250.4 | 5.47 | 4253.8  | 3586.2 | 3342.5 | 3778.9 | 4146.7  | 4047.6  | 3405.6 | 4052.6  |
| A0A024R9 | Thrombosf    | MGLAWGL   | 11 | 10 | 67  | 1  | 1170 | 129.3 | 4.94 | 2782.9  | 2760.4 | 1885.2 | 2612.4 | 2562.7  | 2686    | 2439.8 | 2992.3  |
| P06312   | Immunogl     | MVLQTQV   | 30 | 3  | 150 | 1  | 121  | 13.4  | 5.25 | 695.6   | 596.1  | 541.4  | 617.4  | 633.4   | 772.7   | 811.4  | 765.8   |
| Q6UXG3   | CMRF35-lil   | MRLLVLLW  | 13 | 4  | 114 | 4  | 332  | 36    | 5.92 | 10138.3 | 8746.7 | 7962.6 | 9517.2 | 10915.3 | 10986.5 | 9753.3 | 12761.2 |
| Q9UL81   | Myosin-rec   | DIQMTQSF  | 51 | 3  | 104 | 2  | 107  | 11.5  | 8.48 | 34.3    | 62.8   | 26.6   | 38.9   | 30.3    | 38      | 34.1   | 23.2    |
| D3DVW9   | Protein tyr  | MEPAGPAI  | 35 | 14 | 60  | 3  | 504  | 54.9  | 6.98 | 3944.4  | 3701.6 | 3299.8 | 3873.7 | 4607.8  | 4428.1  | 4253.1 | 3750.6  |
| V9HWB8   | Pyruvate k   | MSKPHSEA  | 30 | 13 | 72  | 13 | 531  | 57.9  | 7.84 | 4612.1  | 3926.1 | 3562.7 | 4358.7 | 4392.5  | 4571    | 5137.3 | 3511.6  |
| B2R4M6   | Protein S1   | MTCKMSQ   | 52 | 6  | 80  | 6  | 114  | 13.2  | 6.13 | 6589.9  | 5338.6 | 3495.5 | 6009.2 | 6572.4  | 6127.6  | 9257.9 | 4812.2  |
| A0A024R2 | Dystroglyc   | MRMSVGL   | 14 | 9  | 54  | 9  | 895  | 97.5  | 8.56 | 2598.5  | 2103.5 | 1831.5 | 2110.9 | 2400.7  | 2450.8  | 1990   | 2219.6  |
| G3V3Y2   | Fibulin-5 (F | MPGIKRILT | 47 | 3  | 80  | 1  | 91   | 9.9   | 6.37 | 188.9   | 217.1  | 121.8  | 192.6  | 184.4   | 179     | 237.3  | 255.6   |
| Q9UL70   | Myosin-rec   | DIQMTQSF  | 48 | 3  | 106 | 2  | 108  | 11.6  | 9.36 | 101     | 108.3  | 81.7   | 91.1   | 95      | 97.9    | 89.3   | 84.6    |
| O00533   | Neural cell  | MEPLLLGR  | 20 | 19 | 54  | 19 | 1208 | 135   | 5.76 | 1722.1  | 1576.4 | 1445.9 | 1956.5 | 1877.3  | 1718.9  | 1643.1 | 1884.3  |
| X6R8F3   | Neutrophil   | MPLGLLWI  | 44 | 6  | 125 | 6  | 200  | 22.8  | 8.5  | 6977.9  | 5396.3 | 3983.1 | 5926.6 | 10723.4 | 5612.7  | 7023.2 | 6613.9  |
| A0A0K0K1 | 6-phospho    | MAAPAPG   | 51 | 10 | 94  | 10 | 258  | 27.5  | 6.05 | 4299.8  | 4210.3 | 3104.4 | 4061.4 | 4581.4  | 4552.2  | 4135   | 3608.4  |
| A2NB45   | Cold agglut  | DIVMTQSP  | 41 | 3  | 156 | 2  | 113  | 12.4  | 8.48 | 1719.5  | 2595.5 | 1320.5 | 1746.8 | 1749.3  | 1796.2  | 1897.8 | 1753.5  |
| E9PNQ8   | Thy-1 mem    | MNLAISIAL | 24 | 4  | 70  | 4  | 165  | 18.2  | 9.16 | 2619    | 3111.1 | 2023.6 | 2671.5 | 2798.9  | 2710.3  | 2412.1 | 2848.4  |
| P09668   | Pro-cathep   | MWATLPLI  | 23 | 7  | 69  | 7  | 335  | 37.4  | 8.07 | 3818.3  | 3708.1 | 3114.7 | 4093.6 | 4162.3  | 4117.3  | 3927.9 | 3752.6  |
| A0A109PW | MS-C1 ligh   | DIQMTQSF  | 26 | 2  | 109 | 1  | 108  | 11.8  | 6.57 | 632.9   | 643.8  | 402.3  | 598.6  | 540.1   | 486.2   | 572.3  | 534.8   |
| Q06830   | Peroxiredo   | MSSGNAKI  | 45 | 9  | 94  | 8  | 199  | 22.1  | 8.13 | 5109.6  | 3996.1 | 3116.1 | 3967   | 5034.6  | 4278.5  | 3861.5 | 4003    |
| A0A140VJ | Sushi dom    | MKPALLPV  | 26 | 12 | 56  | 12 | 822  | 90.2  | 6.28 | 2316.1  | 1852.6 | 1772.3 | 1980   | 2065.6  | 2159.8  | 1559.9 | 2019.6  |
| Q6UXB8   | Peptidase i  | MHGSCSFL  | 17 | 7  | 121 | 2  | 463  | 49.4  | 5.39 | 4194.7  | 6895.6 | 3273.1 | 4707.7 | 3892.8  | 4161.6  | 5028.4 | 5069.6  |
| P26038   | Moesin OS    | MPKTISVR  | 26 | 17 | 87  | 9  | 577  | 67.8  | 6.4  | 1900.3  | 1419.9 | 1609.4 | 1648.8 | 1863.5  | 1982.3  | 1550.3 | 1515.3  |
| B4DUV1   | Fibulin-1 O  | MATHQKD   | 21 | 9  | 52  | 2  | 641  | 70.1  | 5.26 | 3808.6  | 4108.4 | 3064.4 | 4002.7 | 3563    | 3644    | 3855.4 | 4051.8  |
| P14384   | Carboxype    | MDFPCLW   | 27 | 11 | 91  | 11 | 443  | 50.5  | 7.36 | 7591.3  | 6086.5 | 5482.5 | 7051.3 | 7146.8  | 6982.5  | 6406.9 | 7514.5  |

|          |              |           |    |    |     |    |      |       |      |         |         |         |         |         |         |         |         |
|----------|--------------|-----------|----|----|-----|----|------|-------|------|---------|---------|---------|---------|---------|---------|---------|---------|
| A0A0X9TD | MS-D1 ligh   | EIVLTQSPA | 38 | 4  | 217 | 1  | 107  | 11.6  | 8.51 | 6922.7  | 8683.4  | 6141.7  | 7193.8  | 6887.4  | 8061    | 7558.7  | 6873.1  |
| A0A024R9 | Nephrobla    | MQSVQST   | 26 | 8  | 62  | 8  | 357  | 39.1  | 7.72 | 3194.3  | 3252.1  | 2459.5  | 3488.8  | 3041.5  | 2950.5  | 2732.1  | 3228.5  |
| P35908   | Keratin, ty  | MSCQISCK  | 17 | 11 | 66  | 5  | 639  | 65.4  | 8    | 823.2   | 575.3   | 800.4   | 610.1   | 771.6   | 850.1   | 708.4   | 884.5   |
| V9HWB4   | Epididymis   | MKLSLVAA  | 27 | 14 | 63  | 11 | 654  | 72.3  | 5.16 | 1085.3  | 908.9   | 882.4   | 970.4   | 1146.5  | 1092    | 995.2   | 1025.7  |
| P43652   | Afamin OS    | MKLLKLTG  | 21 | 13 | 95  | 13 | 599  | 69    | 5.9  | 6555.5  | 5167.9  | 9319.1  | 6123.9  | 5821.8  | 6216.2  | 6424.9  | 5833.9  |
| A2NI60   | BRE (Fragm   | DIQMTQSF  | 34 | 2  | 101 | 1  | 108  | 11.9  | 4.56 |         |         |         |         |         |         |         |         |
| A0A024R1 | Contactin 1  | MKMWLLV   | 19 | 16 | 63  | 16 | 1018 | 113.2 | 5.9  | 2593.6  | 2385    | 2125    | 2493.1  | 2662.2  | 2498.9  | 2137.7  | 2524.1  |
| Q9Y5Y7   | Lymphatic    | MARCFSLV  | 18 | 6  | 249 | 6  | 322  | 35.2  | 8.28 | 13497.1 | 21240   | 9204.5  | 20244.2 | 18007.5 | 18504.4 | 26382.3 | 22274.4 |
| A0A024R5 | Annexin O    | MSTVHEIL  | 37 | 11 | 55  | 11 | 339  | 38.6  | 7.75 | 2133.6  | 2179.2  | 2212.7  | 2570.7  | 2318.8  | 2357.3  | 2382.2  | 2178.1  |
| Q7Z7M0   | Multiple ep  | MALGKVL   | 7  | 16 | 63  | 16 | 2845 | 302.9 | 6.87 | 2286.2  | 2037.4  | 1769.5  | 2318.4  | 2546.4  | 2450.9  | 1908.6  | 2118.1  |
| A0A0X9UV | MS-B1 ligh   | DIQMTQSF  | 32 | 2  | 101 | 1  | 107  | 11.5  | 7.96 | 22      | 19.9    | 16.8    | 14.9    | 11.5    | 13.4    | 14.5    | 11.2    |
| Q92520   | Protein FA   | MRVAGAA   | 40 | 8  | 65  | 8  | 227  | 24.7  | 8.29 | 3680.4  | 4972.7  | 3158.2  | 3505.7  | 4087.7  | 3307.6  | 3179.6  | 3355.8  |
| P17936   | Insulin-like | MQRARPT   | 29 | 6  | 93  | 6  | 291  | 31.7  | 8.69 | 3835.1  | 3423.4  | 2883.5  | 3101.8  | 4083.1  | 4204.2  | 3949.8  | 3871    |
| S6C4Q9   | IgG L chain  | MAWALLI   | 32 | 6  | 611 | 2  | 217  | 22.8  | 6.76 | 521.1   | 715.4   | 471.4   | 665.7   | 602.4   | 568.8   | 596.1   | 532.7   |
| Q13228   | Selenium-t   | MATKCGN   | 35 | 13 | 83  | 13 | 472  | 52.4  | 6.37 | 3077.2  | 2877.9  | 2469.5  | 3024    | 3094.8  | 3213    | 2905.3  | 3078.1  |
| Q9UL90   | Myosin-re    | EVQLVESG  | 50 | 5  | 99  | 2  | 113  | 12.4  | 8.44 | 744.5   | 577.6   | 711.5   | 632.5   | 880.3   | 652.9   | 689.8   | 667.8   |
| B2RE74   | cDNA, FLJ9   | MADQAPF   | 24 | 6  | 53  | 6  | 338  | 36.8  | 6.68 | 2126.8  | 1580.9  | 1895.1  | 1611.2  | 1945.1  | 1668.7  | 1386.4  | 1428.4  |
| Q9H804   | cDNA FLJ1    | MPGPRVW   | 22 | 8  | 58  | 1  | 438  | 48    | 7.46 | 307.3   | 230.2   | 287.6   | 290.7   | 183.2   | 317.8   | 358.9   | 216.2   |
| V9HW53   | Dimethylar   | MGTPGEG   | 48 | 10 | 55  | 9  | 285  | 29.6  | 6.01 | 2501.4  | 2391.8  | 1909.8  | 2285.5  | 2782.2  | 2671.6  | 2377.4  | 2336.9  |
| Q9UHL4   | Dipeptidyl   | MGSAPWA   | 21 | 8  | 67  | 8  | 492  | 54.3  | 6.32 | 2840.9  | 2170.5  | 2404.5  | 2754.5  | 2972.2  | 3067    | 2389.2  | 2357.4  |
| O00241   | Signal-regu  | MPVPASW   | 29 | 10 | 59  | 7  | 398  | 43.2  | 6.52 | 3648.6  | 3977    | 2785.2  | 3271.7  | 3353.4  | 3901    | 3816.9  | 3846.2  |
| Q9HAT2   | Sialate O-a  | MVAPGLVI  | 21 | 10 | 95  | 10 | 523  | 58.3  | 7.33 | 5690.4  | 5070.3  | 3857.9  | 5266.1  | 6201.3  | 5169.4  | 5246.1  | 5170.6  |
| B7Z9B8   | cDNA FLJ5    | METSLSLES | 6  | 5  | 104 | 5  | 1210 | 129.3 | 4.87 | 5761.1  | 6171.9  | 3949.3  | 5993.9  | 5556.2  | 5967.5  | 4806.3  | 5298.8  |
| Q96DA0   | Zymogen g    | MGAQGAC   | 30 | 5  | 102 | 5  | 208  | 22.7  | 7.39 | 5922.7  | 4720.3  | 3676.1  | 5244.9  | 6937.1  | 4787.5  | 4561.2  | 6621.2  |
| A8K7Q1   | cDNA FLJ7    | MPPSGPRC  | 30 | 12 | 55  | 12 | 461  | 53.9  | 5.25 | 3709.7  | 2704.6  | 3207.6  | 2838.6  | 3151.2  | 3331    | 2708.4  | 3019.9  |
| V9HWE9   | Epididymis   | MPPYTVVY  | 55 | 10 | 60  | 10 | 210  | 23.3  | 5.64 | 2724.2  | 2283.9  | 1889.5  | 2734.4  | 2881.9  | 2660.9  | 2578.8  | 2354.8  |
| P00995   | Serine prot  | MKVTGIFLI | 54 | 4  | 91  | 4  | 79   | 8.5   | 7.61 | 3518.1  | 4646.8  | 3072.8  | 3937.2  | 4284.3  | 4482    | 4145.1  | 4616.6  |
| P23142   | Fibulin-1 O  | MERAAPSF  | 16 | 8  | 48  | 1  | 703  | 77.2  | 5.22 |         |         |         |         |         |         |         |         |
| J3KPF3   | 4F2 cell-su  | MELQPPEA  | 20 | 11 | 44  | 11 | 631  | 68.1  | 5.05 | 2481.6  | 1848.5  | 1686    | 2022.9  | 2327    | 2371.8  | 1878.3  | 1964.2  |
| P01023   | Alpha-2-m    | MGKNKLLH  | 14 | 17 | 49  | 17 | 1474 | 163.2 | 6.46 | 2846.8  | 1790.8  | 1615.2  | 2120.8  | 1764.6  | 2447.4  | 1904.3  | 1389.4  |
| A0A146E5 | Mesenchy     | MQELHLLV  | 18 | 6  | 67  | 6  | 428  | 46    | 5.15 | 3860.1  | 3901.6  | 2476.7  | 4008.5  | 4118.3  | 4203.8  | 3991.6  | 3675.7  |
| Q6LES2   | Annexin (F   | MAMATKG   | 46 | 13 | 47  | 12 | 321  | 36.1  | 6.13 | 2260.1  | 1675.5  | 1802.2  | 2131.6  | 2170.9  | 2216.3  | 1804.7  | 1926.9  |
| V9HW12   | Epididymis   | MASGNAR   | 41 | 10 | 40  | 9  | 198  | 21.9  | 5.97 | 2931.3  | 2180.4  | 1703.8  | 2218.3  | 2695.6  | 2416.8  | 2170.5  | 2198.6  |
| A0A087W  | Neural cell  | MLQTKDLI  | 11 | 9  | 123 | 9  | 884  | 97.3  | 4.93 | 6867.7  | 6201    | 4723.8  | 6512.9  | 7057.6  | 7053.3  | 6276.5  | 7327.9  |
| P05109   | Protein S1   | MLTELEKA  | 56 | 7  | 131 | 7  | 93   | 10.8  | 7.03 | 11368.9 | 8367.2  | 5845.8  | 10957.3 | 11092.3 | 8418.2  | 16271.7 | 7687.1  |
| A0A0S2Z4 | HCG20398     | MASTSTTIF | 24 | 14 | 53  | 6  | 564  | 60    | 8    | 2751.2  | 1418.1  | 1540.3  | 1412.6  | 1874.5  | 2630.1  | 3741.2  | 2019.2  |
| A0A0G2JL | Leukocyte    | MSPHPTAL  | 16 | 5  | 135 | 2  | 287  | 31.5  | 5.78 | 9309.4  | 8803.8  | 7112.7  | 10296   | 10161.5 | 10274.9 | 9720.2  | 10954.7 |
| M9MML0   | Fc of IgG lc | MGGGAGE   | 18 | 6  | 107 | 2  | 290  | 32.7  | 8.1  | 2065.5  | 1762.7  | 1408.9  | 2087.8  | 1902.6  | 2406.7  | 1841.5  | 2128.2  |
| P17900   | Gangliosid   | MQSLMQA   | 26 | 6  | 366 | 6  | 193  | 20.8  | 5.31 | 26291.2 | 37220.9 | 17844.8 | 33707.9 | 36274.8 | 30110.7 | 45241.4 | 30307.1 |
| Q14766   | Latent-trar  | MAGAWLF   | 8  | 10 | 32  | 10 | 1721 | 186.7 | 5.96 | 1740.2  | 2345.7  | 1354.9  | 1814.4  | 1769.2  | 1682.6  | 1620.1  | 1726.8  |
| V9HWC9   | Superoxide   | MATKAVCV  | 51 | 5  | 85  | 5  | 154  | 15.9  | 6.13 | 6624.5  | 7573.1  | 5875.6  | 7308.5  | 7867.9  | 6568.3  | 6099.7  | 7051.2  |



|           |              |          |    |    |     |    |      |       |      |         |         |        |         |         |         |         |         |
|-----------|--------------|----------|----|----|-----|----|------|-------|------|---------|---------|--------|---------|---------|---------|---------|---------|
| A8K0E7    | cDNA FLJ7    | MDSGAGG  | 10 | 9  | 48  | 9  | 1060 | 114.6 | 5.02 | 1621.8  | 1477    | 1200   | 1499.5  | 1658.5  | 1702.6  | 1531.7  | 1642.1  |
| Q8N114    | Protein shi  | MTAPVPAF | 15 | 4  | 139 | 4  | 240  | 25.6  | 6.68 | 7917.8  | 7596    | 5190.8 | 8312.4  | 8938    | 8866.3  | 8826.3  | 9621.4  |
| A8K5T0    | cDNA FLJ7    | MRLAKIIC | 15 | 15 | 41  | 13 | 1231 | 138.9 | 6.71 | 2427    | 2126.8  | 1682.7 | 1907.5  | 1816.1  | 2171.7  | 2007.4  | 1759.1  |
| P61970    | Nuclear tra  | MGDKPIW  | 51 | 4  | 89  | 4  | 127  | 14.5  | 5.38 | 4776.5  | 3725    | 3291.9 | 4216.4  | 5200.8  | 5235.9  | 4608.7  | 4546.1  |
| Q53HF3    | Galactosid   | MQLRNPEI | 29 | 11 | 58  | 11 | 429  | 48.7  | 5.6  | 2257.9  | 1522.3  | 1554.9 | 1689.8  | 2162.2  | 2305    | 1481.8  | 1888    |
| A8K7E0    | cDNA FLJ7    | MWPLWRI  | 26 | 8  | 54  | 7  | 368  | 41.6  | 7.52 | 2175.2  | 1777.9  | 1639.2 | 2115.3  | 2503.3  | 2498    | 1949.8  | 1780.1  |
| A0A0X9T7  | MS-D3 hea    | EVQLVESG | 34 | 4  | 88  | 3  | 134  | 15    | 5.92 | 1066.4  | 825.6   | 970.3  | 970.9   | 1053.7  | 912.5   | 1027.9  | 988     |
| P26842    | CD27 antig   | MARPHPW  | 22 | 4  | 102 | 4  | 260  | 29.1  | 7.64 | 7241.3  | 8781.8  | 5361   | 8328    | 7492    | 8459.2  | 8591.4  | 8475.3  |
| Q9UHG2    | ProSAAS O    | MAGSPLLV | 38 | 7  | 52  | 6  | 260  | 27.4  | 6.62 | 2006.3  | 1615.3  | 1372.2 | 1626.7  | 1858.4  | 1994.7  | 1628.7  | 1948.4  |
| P39059    | Collagen al  | MAPRRNN  | 4  | 5  | 94  | 5  | 1388 | 141.6 | 5    | 5465.6  | 4044.1  | 4524.8 | 5523.7  | 5827.2  | 5977.5  | 4145.9  | 5038.6  |
| D3DX01    | Amine oxid   | MPALGWA  | 16 | 11 | 55  | 11 | 751  | 85.3  | 7.09 | 2049.2  | 2070.4  | 1802   | 1655.5  | 2233.3  | 1984.6  | 1995.2  | 2004.7  |
| S6BGF5    | IgG H chair  | MDWTWR   | 26 | 5  | 151 | 1  | 240  | 25.6  | 8.56 | 1192.1  | 845     | 1179.8 | 1052    | 1038.8  | 1036.4  | 1099.6  | 1031.6  |
| Q0ZCJ2    | Immunglot    | LVQLVESG | 46 | 5  | 89  | 1  | 124  | 13.6  | 7.93 | 38.8    | 37.4    | 28.2   | 41.6    | 35.7    | 27.7    | 26.7    | 24.3    |
| Q59EP2    | Angiotensi   | VLQQKGM  | 16 | 7  | 65  | 7  | 491  | 53.7  | 6.42 | 2605.1  | 2571.8  | 2309.7 | 2338.5  | 2834.5  | 2294.5  | 2443    | 2105.4  |
| A6XNE2    | Compleme     | MHSWERL  | 30 | 6  | 33  | 6  | 260  | 27.8  | 7.25 | 781.8   | 804.9   | 590.3  | 636.8   | 704     | 786.6   | 728.6   | 564.6   |
| A0A068LKF | Ig heavy ch  | QVQLVESG | 33 | 3  | 55  | 1  | 125  | 13.9  | 9.01 | 671.9   | 506.6   | 675.4  | 667.3   | 777.7   | 516.7   | 714.8   | 666.2   |
| Q9HD89    | Resistin OS  | MKALCLLI | 69 | 5  | 54  | 5  | 108  | 11.4  | 6.86 | 2217.6  | 1779.3  | 1616.5 | 2079    | 2087.2  | 2264.9  | 2240.8  | 1785.5  |
| P07900    | Heat shock   | MPEETQTC | 19 | 12 | 44  | 6  | 732  | 84.6  | 5.02 | 1982.8  | 1471.1  | 1355.8 | 1550    | 1803.6  | 1925.8  | 1429.5  | 1472.5  |
| Q9HCN6    | Platelet gly | MSPSPTAL | 19 | 6  | 115 | 6  | 339  | 36.8  | 9.2  | 5401.9  | 4653    | 3841   | 4876.3  | 5472.5  | 4774.4  | 4989.3  | 5334.1  |
| P05937    | Calbindin C  | MAESHLQS | 34 | 8  | 50  | 8  | 261  | 30    | 4.83 | 3120.3  | 2021.4  | 2552.3 | 2504.5  | 2977.9  | 2806    | 3014.6  | 2335.8  |
| Q13332    | Receptor-t   | MAPTWGPF | 9  | 10 | 25  | 9  | 1948 | 216.9 | 6.46 | 915.3   | 826.1   | 720.2  | 816.5   | 883.4   | 844     | 710.9   | 855.9   |
| P05164    | Myeloper     | MGVPPFSS | 20 | 13 | 48  | 13 | 745  | 83.8  | 8.97 | 2474.9  | 1795.9  | 1263.4 | 1544.4  | 1808.1  | 2952.7  | 2311.4  | 1404.2  |
| P08138    | Tumor nec    | MGAGATG  | 9  | 3  | 96  | 3  | 427  | 45.2  | 4.7  | 6089.6  | 5018.9  | 4209.4 | 6183.3  | 5837.5  | 5233.7  | 5392    | 6441.7  |
| Q5TFQ8    | Signal-regu  | MPVPASW  | 36 | 11 | 47  | 1  | 398  | 43.3  | 7.83 |         |         |        |         |         |         |         |         |
| X5D7A8    | Cell adhesi  | MASVVLPS | 12 | 5  | 92  | 5  | 471  | 51.5  | 4.87 | 4355.4  | 3410.7  | 3144.4 | 4044    | 4109.3  | 4185.9  | 4041.7  | 4714.4  |
| P00352    | Retinal def  | MSSSGTPD | 31 | 13 | 38  | 11 | 501  | 54.8  | 6.73 | 1665.4  | 1147    | 1404.6 | 1296    | 1586.3  | 1485.7  | 1109.5  | 1152.8  |
| Q16769    | Glutaminyl   | MAGGRHR  | 12 | 4  | 106 | 4  | 361  | 40.9  | 6.61 | 5273.8  | 4544.2  | 3676   | 4501.6  | 5319.2  | 5943    | 4307.9  | 6127    |
| A0A024R5  | Prolylcarb   | MGRRALLL | 14 | 6  | 62  | 6  | 496  | 55.8  | 7.21 | 2348.5  | 1816.3  | 1623.9 | 2294.1  | 2412.9  | 2636.9  | 2051.7  | 2154.2  |
| Q8TDQ0    | Hepatitis A  | MFSHLPFD | 17 | 6  | 201 | 6  | 301  | 33.4  | 5.72 | 11849.5 | 10111.4 | 8585.3 | 12179.6 | 12614.3 | 11397.2 | 12392.8 | 12319.8 |
| Q9UIB8    | SLAM fami    | MAQHHLW  | 19 | 5  | 61  | 5  | 345  | 38.8  | 7.06 | 2794.8  | 2510.8  | 2060   | 2804    | 2646.8  | 2772.8  | 2812.1  | 2814.1  |
| A0A087W2  | Ribonuclea   | MRPAALRC | 32 | 8  | 46  | 8  | 306  | 34.9  | 7.11 | 1726.6  | 1731.7  | 1292.8 | 1821.6  | 1698.9  | 1554    | 1615.7  | 1668.3  |
| A0A024RA  | Betaine-ho   | MAPAGRP  | 31 | 9  | 47  | 5  | 363  | 40.3  | 5.87 | 337.8   | 237.5   | 290.9  | 222.5   | 268.4   | 288.7   | 217.4   | 221.3   |
| O94910    | Adhesion C   | MARLAAVI | 6  | 7  | 43  | 7  | 1474 | 162.6 | 6.6  | 1408.8  | 1034.8  | 1152.5 | 1145.8  | 1207    | 1139.3  | 1024.2  | 1235.7  |
| Q9Y2E5    | Epididymis   | MGQLCWL  | 13 | 11 | 51  | 11 | 1009 | 113.9 | 7.24 | 2511.5  | 1880.1  | 1749.3 | 2266.8  | 2665.7  | 2456.1  | 1958.5  | 1984.9  |
| Q6ICS1    | Putative ur  | MAQTNSFF | 24 | 3  | 114 | 1  | 166  | 18.7  | 5.95 | 29.8    | 68.7    | 29.7   | 27.5    | 40.9    | 61.3    | 41.6    | 30.7    |
| P07737    | Profilin-1 C | MAGWNA   | 63 | 7  | 73  | 7  | 140  | 15    | 8.27 | 4046.8  | 4969.7  | 2210.9 | 3424.1  | 3815.9  | 3843.3  | 3985.6  | 2994    |
| O96009    | Napsin-A C   | MSPPPLQ  | 13 | 6  | 71  | 6  | 420  | 45.4  | 6.61 | 7511.5  | 5588.8  | 4732.2 | 6183.3  | 8213.1  | 8080.5  | 6626.3  | 5563.1  |
| O43707    | Alpha-actir  | MVDYHAA  | 16 | 12 | 31  | 7  | 911  | 104.8 | 5.44 | 1027.5  | 816.9   | 685.2  | 836.7   | 908.5   | 865.1   | 836.4   | 766.8   |
| B3KQF4    | cDNA FLJ9    | MAPFEPLA | 45 | 7  | 40  | 7  | 207  | 23.2  | 8.1  | 1424.4  | 1623.5  | 1361.2 | 1355.5  | 1601    | 910.3   | 1127.4  | 1549.3  |
| E7EX29    | 14-3-3 pro   | MDKNELVC | 31 | 7  | 53  | 5  | 246  | 28    | 4.92 | 3019.6  | 2253.7  | 1805.9 | 2220.8  | 2654.9  | 2262.3  | 2440.6  | 2159.2  |
| A0A024RA  | Carboxype    | MVGAMW   | 24 | 9  | 40  | 9  | 476  | 54.1  | 5.62 | 2082.3  | 1494.3  | 1678.4 | 1755.8  | 1866.3  | 2239.4  | 1659.7  | 1637.3  |

|          |              |          |    |    |     |    |      |       |      |         |         |        |         |         |         |         |         |
|----------|--------------|----------|----|----|-----|----|------|-------|------|---------|---------|--------|---------|---------|---------|---------|---------|
| Q03591   | Compleme     | MWLLVSVI | 20 | 6  | 36  | 2  | 330  | 37.6  | 7.39 | 1255.8  | 1348.3  | 1029.9 | 1501    | 1546.7  | 1320.3  | 1395    | 1680.8  |
| Q0ZCI8   | Immunglot    | LVQLVESG | 46 | 5  | 91  | 1  | 124  | 13.7  | 6.61 | 3687    | 2573.4  | 3131.5 | 3709.9  | 3624.2  | 3036.7  | 4086.2  | 3187.9  |
| Q86T13   | C-type lect  | MRPAFALC | 15 | 6  | 54  | 6  | 490  | 51.6  | 6.35 | 3762.7  | 3412.6  | 2841.4 | 3417.4  | 3589.2  | 3429    | 3131.1  | 3765.5  |
| B2R5M8   | Isocitrate c | MSKKISGG | 30 | 12 | 48  | 12 | 414  | 46.6  | 7.01 | 2637.9  | 2191.9  | 1916.5 | 2227.2  | 2655.5  | 2079    | 1758.9  | 1994.9  |
| F5H265   | Polyubiqui   | MQIFVKTL | 72 | 7  | 126 | 7  | 149  | 16.8  | 6.58 | 8762.6  | 9627.2  | 6689.7 | 9272.1  | 9372.1  | 9688.2  | 8035.3  | 9502.6  |
| P12273   | Prolactin-ir | MRLQLLF  | 36 | 5  | 115 | 5  | 146  | 16.6  | 8.05 | 6014.5  | 5684.5  | 3471.5 | 12194.5 | 6161    | 4771.9  | 4172.1  | 5909.5  |
| A8K4K1   | cDNA FLJ7    | MTGERPST | 22 | 8  | 43  | 8  | 415  | 45.3  | 5.88 | 2706.7  | 2104.8  | 2049.9 | 2339    | 2351.3  | 2887.8  | 2295.4  | 2325.6  |
| V9HW43   | Epididymis   | MTERRVPP | 31 | 5  | 33  | 5  | 205  | 22.8  | 6.4  | 1537.5  | 1307    | 1189.3 | 1315.5  | 1427    | 1456.7  | 1291.5  | 1213.8  |
| A8K5S3   | cDNA FLJ7    | MLGSGFKA | 18 | 8  | 75  | 8  | 364  | 39.7  | 5.35 | 5732.7  | 4725.4  | 4608.2 | 5445.7  | 6607.4  | 5516.1  | 4576.7  | 5655.8  |
| P07686   | Beta-hexos   | MELCGLGL | 21 | 11 | 62  | 10 | 556  | 63.1  | 6.76 | 4263.5  | 2996    | 3163.9 | 3938.5  | 4365    | 4680.2  | 3690.5  | 3543.4  |
| P23470   | Receptor-t   | MRRLLEPC | 6  | 7  | 42  | 7  | 1445 | 161.9 | 6.42 | 1654.2  | 1650.3  | 1264.4 | 1576.3  | 1615.9  | 1460.7  | 1574    | 1622.6  |
| P35527   | Keratin, ty  | MSCRQFSS | 14 | 8  | 74  | 7  | 623  | 62    | 5.24 | 5294.4  | 3524    | 4589.8 | 4269.9  | 3950.4  | 4250.1  | 3597.8  | 4522.6  |
| P55291   | Cadherin-1   | MDAAFLLV | 12 | 7  | 25  | 7  | 814  | 88.9  | 4.98 | 288     | 234.6   | 279.5  | 229.6   | 254.8   | 309.3   | 265.3   | 325.8   |
| Q92896   | Golgi appa   | MAACGRV  | 15 | 15 | 34  | 15 | 1179 | 134.5 | 6.9  | 2052.1  | 1838.1  | 1529.4 | 1753.1  | 1923.1  | 1985.1  | 1659.2  | 1840.1  |
| P19013   | Keratin, ty  | MIARQCV  | 20 | 10 | 34  | 7  | 534  | 57.3  | 6.61 | 1337.8  | 812.9   | 978.6  | 804.4   | 941.4   | 1621.4  | 1858.7  | 765.5   |
| A0A0X9T7 | GCT-A4 lig   | DIVMTQSP | 60 | 4  | 152 | 2  | 109  | 11.8  | 8.47 | 9768.6  | 12718.8 | 6822   | 10547.4 | 9206.9  | 11836.9 | 10789.2 | 9483.6  |
| Q9GZX9   | Twisted ga   | MKLHYVAN | 24 | 4  | 43  | 4  | 223  | 25    | 5.34 | 2504.2  | 2159.2  | 1627.6 | 2503.7  | 2641.7  | 2572.4  | 2643.7  | 2924.7  |
| A0A024RA | Oxidised lo  | MTFDDLKI | 17 | 4  | 35  | 4  | 273  | 30.9  | 7.28 | 2452.2  | 1716.2  | 1613.3 | 2061.5  | 2389.4  | 1942.1  | 1780    | 1957.6  |
| P02452   | Collagen al  | MFSFVDLR | 7  | 10 | 33  | 5  | 1464 | 138.9 | 5.8  | 3928.9  | 3402.1  | 2538   | 4811.3  | 3750.4  | 4245.3  | 4631.9  | 3460.5  |
| P35052   | Glypican-1   | MELRARGV | 21 | 8  | 22  | 8  | 558  | 61.6  | 7.3  | 1244.5  | 1141.8  | 1047.5 | 1204.3  | 1242.2  | 1150    | 1060    | 1240.3  |
| Q9UBC9   | Small proli  | MSSYQQKC | 71 | 8  | 121 | 8  | 169  | 18.1  | 8.57 | 5390.1  | 12762   | 9129   | 10573.1 | 8360.2  | 6416    | 11899.2 | 9233.8  |
| A0N5G1   | Rheumatoid   | DIQMTQSP | 32 | 3  | 56  | 3  | 116  | 12.5  | 8.46 | 2360.1  | 1989.1  | 1960.5 | 1873.6  | 2111.2  | 2171    | 2250.6  | 2204.4  |
| O43490   | Prominin-1   | MALVLGSL | 17 | 11 | 32  | 11 | 865  | 97.1  | 7.27 | 1222.6  | 997     | 966.4  | 1167.5  | 1296    | 1105.4  | 952.1   | 1212.4  |
| A2NZ55   | Variable im  | QVQLQESG | 31 | 3  | 66  | 1  | 131  | 13.9  | 8.79 | 147.8   | 123.4   | 193.1  | 127.9   | 134.6   | 110.3   | 102.6   | 102.9   |
| Q8IWU5   | Extracellul  | MGPPSLVL | 3  | 2  | 151 | 2  | 870  | 100.4 | 9.17 | 10334.4 | 8417.1  | 7503.2 | 10138.2 | 10534.8 | 12935.1 | 9686.6  | 10985.6 |
| P02533   | Keratin, ty  | MTTCSRQF | 18 | 10 | 79  | 1  | 472  | 51.5  | 5.16 |         |         |        |         |         |         |         |         |
| K4DIA0   | ICOS liganc  | MRLGSPGL | 8  | 3  | 88  | 3  | 473  | 51.9  | 8.05 | 5079.2  | 4272.8  | 3998.4 | 4664.2  | 4927    | 5008.9  | 4414    | 5031.9  |
| G9K388   | YWHAE/FA     | RADPAGAA | 16 | 6  | 54  | 4  | 384  | 41.2  | 4.97 | 679.3   | 470.5   | 511.8  | 544.3   | 687.1   | 594.4   | 534.4   | 553.6   |
| P01036   | Cystatin-S   | MARPLCTL | 55 | 6  | 26  | 3  | 141  | 16.2  | 5.02 | 1438.1  | 1542.3  | 1180.3 | 1476.5  | 1583.9  | 1129.7  | 1276.4  | 1649.6  |
| A0A140VK | Testicular s | MGPPGSPV | 16 | 6  | 32  | 6  | 440  | 49.5  | 6.11 | 1582.4  | 931.6   | 1596.7 | 1267.1  | 1527.6  | 1622.4  | 1341.4  | 1333    |
| P61626   | Lysozyme     | MKALIVLG | 45 | 5  | 49  | 5  | 148  | 16.5  | 9.16 | 3032.5  | 2727.6  | 1886.7 | 2625.8  | 2860.8  | 2982.3  | 2609.5  | 2357.3  |
| E7EMB3   | Calmodulir   | MILAHCNL | 21 | 5  | 45  | 4  | 196  | 21.7  | 4.56 | 2441.8  | 1992    | 1697.6 | 2329.9  | 2483.3  | 2298    | 2206.6  | 2471    |
| G5EA09   | Syndecan t   | MIKLWTNF | 22 | 4  | 41  | 4  | 318  | 34.8  | 8.51 | 883.9   | 839.2   | 687.6  | 935.9   | 1056.2  | 818.4   | 776.2   | 873.8   |
| BOYJ88   | Radixin OS   | MPKPINVR | 16 | 11 | 55  | 3  | 583  | 68.5  | 6.37 | 311.9   | 233.5   | 281.2  | 249.1   | 280.8   | 295.1   | 224.3   | 241.6   |
| Q5SZK8   | FRAS1-rela   | MHSAGTPC | 4  | 10 | 26  | 10 | 3169 | 350.9 | 5.03 | 792.6   | 737.9   | 594.6  | 761.9   | 773.3   | 804.4   | 675     | 719     |
| B7ZLI0   | Reticulon 4  | MLPGLRRL | 20 | 8  | 53  | 8  | 420  | 46.1  | 7.62 | 2245.9  | 1658.8  | 1591.9 | 1972.1  | 2026.8  | 2360.3  | 1624.4  | 2004.2  |
| P36980   | Compleme     | MWLLVSVI | 26 | 6  | 33  | 3  | 270  | 30.6  | 6.38 | 134.1   | 423.3   | 103.5  | 108.3   | 139.9   | 112.3   | 117.5   | 120.1   |
| P08779   | Keratin, ty  | MTTCSRQF | 18 | 10 | 76  | 2  | 473  | 51.2  | 5.05 | 654     | 462.9   | 554.2  | 480     | 472.5   | 584     | 484     | 560.6   |
| A0A0B4J1 | Immunogl     | MEFGLSWY | 25 | 3  | 59  | 1  | 117  | 12.8  | 8.66 | 728.4   | 496.3   | 518.8  | 706.7   | 598.3   | 825     | 743.9   | 655     |
| Q9NZZ3   | Charged m    | MNRLFGKA | 32 | 6  | 39  | 6  | 219  | 24.6  | 4.83 | 2103.7  | 1732.4  | 1767.8 | 1974.2  | 2283.4  | 2130.3  | 1763.5  | 2219.9  |
| P54760   | Ephrin typ   | MELRVLLC | 13 | 9  | 41  | 9  | 987  | 108.2 | 6.9  | 4150.1  | 3597.8  | 3661.3 | 3917.5  | 4111.6  | 3935.4  | 3866.3  | 3845.3  |

|           |              |           |    |    |     |   |      |       |      |        |         |        |         |         |        |         |         |
|-----------|--------------|-----------|----|----|-----|---|------|-------|------|--------|---------|--------|---------|---------|--------|---------|---------|
| B5BU24    | 14-3-3 pro   | MTMDKSE   | 33 | 7  | 47  | 4 | 246  | 28.1  | 4.83 | 540.2  | 366.4   | 401.3  | 437.2   | 510.3   | 484    | 437.3   | 417.7   |
| P00918    | Carbonic a   | MSHHWGY   | 33 | 7  | 35  | 7 | 260  | 29.2  | 7.4  | 3153.7 | 2148.2  | 2165.8 | 2471.6  | 3115.3  | 3077.6 | 2633.3  | 2325.9  |
| Q9NXI0    | cDNA FLJ2    | MAIHKALV  | 39 | 6  | 71  | 6 | 162  | 17.8  | 7.43 | 4281.8 | 4055.2  | 3679.7 | 4597    | 5375.9  | 4133.3 | 3868    | 4622.8  |
| B4DRC8    | cDNA FLJ5    | MARFWVC   | 21 | 6  | 38  | 6 | 347  | 38.2  | 6.43 | 1742.5 | 1525.8  | 1295   | 1580.4  | 1695.9  | 1801.9 | 1645.9  | 1667.8  |
| P13727    | Bone marr    | MKLPLLLAI | 29 | 6  | 44  | 6 | 222  | 25.2  | 6.76 | 1267.2 | 1601.6  | 1054.8 | 1330.5  | 1262.3  | 1452.9 | 979.8   | 1435.9  |
| A0A024R6  | G protein-c  | MTPQSLLC  | 11 | 6  | 56  | 6 | 693  | 77.7  | 8.48 | 1542.9 | 1553.7  | 1174.7 | 1514.9  | 1606.5  | 1744.4 | 1340.7  | 1492.5  |
| Q1HP67    | Lipoprotei   | MEHKEVVI  | 15 | 4  | 44  | 4 | 2040 | 226.4 | 6.07 | 2174.3 | 2279.4  | 2206.5 | 2303.6  | 2567.9  | 2156.5 | 2616.5  | 2730.5  |
| P08727    | Keratin, ty  | MTSYSYRQ  | 24 | 11 | 76  | 3 | 400  | 44.1  | 5.14 | 2142   | 1364.5  | 1990.4 | 1636.9  | 1657.7  | 1925.6 | 2072.4  | 1779.3  |
| Q9UL86    | Myosin-re    | EIVLTQSPG | 45 | 3  | 39  | 2 | 109  | 11.9  | 7.96 | 1789.8 | 1610.9  | 1129.5 | 1322.2  | 1775.7  | 1837.6 | 2061.6  | 1607.2  |
| P08572    | Collagen al  | MGRDQRA   | 4  | 7  | 29  | 7 | 1712 | 167.4 | 8.66 | 2006.7 | 1716.7  | 1584.4 | 1839.5  | 1975.3  | 1847.8 | 1623.4  | 1789.4  |
| P01037    | Cystatin-S   | MAQYLSTL  | 44 | 4  | 23  | 2 | 141  | 16.4  | 7.21 | 24.8   | 28.8    | 27.4   | 21.9    | 22.3    | 19.6   | 19.4    | 21.5    |
| B7ZL91    | Meprin A s   | MAWIRSTC  | 5  | 2  | 80  | 2 | 774  | 87.8  | 5.78 | 2291.6 | 2357.6  | 1893.1 | 1972    | 2081.8  | 2006.6 | 1956.4  | 2072.7  |
| Q562M3    | Actin-like p | KIWHHTFY  | 28 | 2  | 76  | 1 | 103  | 11.5  | 6.68 | 74.8   | 64.7    | 55.9   | 55.6    | 75.9    | 66.1   | 64.7    | 55.1    |
| P08697    | Alpha-2-an   | MALLWGLL  | 16 | 6  | 36  | 6 | 491  | 54.5  | 6.29 | 2105.7 | 1715.7  | 1461.5 | 1904.1  | 2323.6  | 2062.6 | 1827.3  | 1902.8  |
| O43653    | Prostate st  | MKAVLLAL  | 22 | 2  | 164 | 2 | 123  | 12.9  | 5.29 | 12636  | 8903    | 7470.4 | 12814.1 | 19102.5 | 9102   | 7892.3  | 14644.6 |
| B1N7B8    | Cryocrysta   | EIVLTQSPA | 28 | 2  | 129 | 1 | 107  | 11.8  | 7.99 | 317.5  | 330.5   | 195.3  | 310.9   | 269.9   | 372.9  | 295.6   | 287.4   |
| J3KPS3    | Fructose-b   | MPYQYPAL  | 31 | 10 | 68  | 9 | 368  | 39.8  | 8.09 | 2061.1 | 1731.8  | 1659.4 | 1871    | 1945.5  | 1787   | 1970.7  | 1637.1  |
| E9PKP4    | Macrophag    | MIGSGHLC  | 56 | 5  | 40  | 1 | 113  | 13.2  | 5.25 | 161    | 130.3   | 93.3   | 156     | 122.2   | 153.8  | 125.3   | 117     |
| G3V3D1    | Epididymal   | MRFLAATF  | 23 | 6  | 53  | 6 | 221  | 23.7  | 6.73 | 5071.2 | 4544.1  | 4043.5 | 5687.7  | 5665    | 5183.7 | 4749.9  | 5185.3  |
| M9MML6    | Low affinit  | MGGGTGE   | 21 | 7  | 64  | 3 | 269  | 29.9  | 6.92 | 5733   | 4810.8  | 4415.7 | 5931    | 5551.6  | 4437.6 | 5472.1  | 5907.2  |
| K7EKE8    | Nectin-2 (F  | XKPKNQAE  | 45 | 8  | 40  | 1 | 210  | 22.7  | 4.91 | 70.9   | 60.7    | 61.4   | 64.3    | 70.6    | 67.9   | 56.4    | 69.3    |
| P05787    | Keratin, ty  | MSIRVTQK  | 18 | 10 | 40  | 6 | 483  | 53.7  | 5.59 | 585.3  | 414.8   | 335.9  | 397.8   | 473.5   | 529    | 784.1   | 378.4   |
| V9HW77    | Epididymis   | MPFSNSHM  | 29 | 7  | 25  | 7 | 381  | 42.6  | 5.59 | 884.9  | 860     | 777.8  | 764.6   | 831.3   | 647.8  | 591.7   | 765.9   |
| Q96KP4    | Cytosolic n  | MAALTTLF  | 24 | 8  | 29  | 8 | 475  | 52.8  | 5.97 | 933.4  | 723     | 968.5  | 723.4   | 839.6   | 784.8  | 687.6   | 620     |
| A0A140VJI | Dipeptidas   | MWSGWW    | 17 | 6  | 43  | 6 | 411  | 45.6  | 6.15 | 2516.8 | 1651.9  | 1699.5 | 1992.2  | 2163.6  | 2087.6 | 1612.2  | 1991.3  |
| Q9HCC1    | Single chai  | EVQLVESG  | 37 | 3  | 48  | 1 | 112  | 12.2  | 8.47 | 55.8   | 45.9    | 53.9   | 44.4    | 50.4    | 44     | 47.9    | 59.9    |
| P01624    | Immunogl     | MEAPAQLL  | 26 | 2  | 132 | 0 | 115  | 12.5  | 5.19 | 321.4  | 341.2   | 274.6  | 335.5   | 342.8   | 380.3  | 421.6   | 394.7   |
| P08238    | Heat shock   | MPEEVHHC  | 12 | 8  | 27  | 1 | 724  | 83.2  | 5.03 | 223.9  | 161.2   | 144.4  | 165.2   | 201.9   | 220.2  | 164.8   | 175.5   |
| A8K486    | Peptidyl-pr  | MVNPTVFF  | 53 | 8  | 66  | 8 | 165  | 18    | 6.9  | 3466   | 3071.8  | 2421.9 | 3017.3  | 3213.8  | 2980.3 | 2738    | 2486.2  |
| A8K3I0    | cDNA FLJ7    | MVPDTACV  | 17 | 8  | 28  | 7 | 757  | 82.8  | 4.59 | 1635.7 | 1251.2  | 1235.1 | 1517.7  | 1531.9  | 1335.8 | 1377.3  | 1548.7  |
| H3BUX1    | Mesothelir   | VEKTACPS  | 17 | 6  | 50  | 1 | 398  | 43.8  | 6.37 | 249.1  | 163.7   | 158.5  | 163.8   | 195.9   | 179.5  | 159.4   | 170.1   |
| A5PLM9    | Cathepsin    | MNPTLILA  | 20 | 6  | 49  | 6 | 333  | 37.5  | 5.45 | 2778.1 | 2427.9  | 1997.4 | 2643    | 2692.1  | 2451.3 | 2328    | 2498    |
| A0A140VK  | Testis tissu | MQALVLLL  | 20 | 7  | 33  | 7 | 418  | 46.3  | 6.38 | 712.7  | 614.6   | 655.5  | 545.8   | 594.5   | 648.9  | 610.7   | 486.1   |
| A0A0C4DG  | Poliovirus   | MARAMAA   | 12 | 6  | 63  | 6 | 417  | 45.3  | 6.52 | 3861.3 | 3487.2  | 3365.3 | 4192.5  | 4276.3  | 4492.2 | 3807.5  | 4425    |
| A0A0G2JN  | Ephrin type  | MATEGAA   | 9  | 6  | 26  | 6 | 1022 | 110.7 | 6.65 | 1132.9 | 1158.7  | 848.8  | 1042.2  | 1122.4  | 1062.7 | 929     | 1083.3  |
| Q92692    | Nectin-2 O   | MARAAALI  | 16 | 8  | 44  | 1 | 538  | 57.7  | 4.82 | 2270.3 | 1939.5  | 1743.8 | 2226    | 2396.9  | 2911.6 | 2197.8  | 2261.7  |
| H9ZYJ2    | Thioredoxi   | MVKQIESK  | 40 | 5  | 86  | 5 | 105  | 11.7  | 4.92 | 5920.6 | 4943.4  | 3751.3 | 4701.9  | 5871.3  | 4765.7 | 5276.5  | 5069.4  |
| V9HW87    | Abhydrolas   | MAASVEQI  | 33 | 5  | 33  | 5 | 210  | 22.3  | 6.4  | 1439.8 | 1138.1  | 739.7  | 917.8   | 1029.2  | 1228.9 | 1033.4  | 868.9   |
| A0A0S2Z4F | Secretoglo   | MKLAVTLT  | 20 | 3  | 114 | 3 | 91   | 10    | 5.06 | 5373.7 | 10779.9 | 5773   | 7533.6  | 32076.5 | 6110.8 | 10733.6 | 13735   |
| C9JC84    | Fibrinogen   | MSWSLHP   | 28 | 9  | 37  | 9 | 461  | 52.3  | 5.63 | 1762.4 | 1127.8  | 921.8  | 1226.6  | 1006.6  | 1831.3 | 1206.5  | 884.6   |
| P09228    | Cystatin-SA  | MAWPLCT   | 48 | 5  | 22  | 3 | 141  | 16.4  | 4.93 | 278.3  | 284.7   | 226.7  | 292.8   | 253.7   | 251.4  | 237.9   | 244.6   |

|          |              |           |    |    |     |    |      |       |      |        |         |        |        |         |        |        |        |
|----------|--------------|-----------|----|----|-----|----|------|-------|------|--------|---------|--------|--------|---------|--------|--------|--------|
| A8K4G7   | cDNA FLJ7    | MSSTSPNL  | 18 | 8  | 78  | 5  | 444  | 49.2  | 6.76 | 638    | 489.7   | 518.1  | 602.5  | 679.2   | 581.9  | 499.3  | 601.9  |
| C9JKV3   | Tissue fact  | MIYTMKKV  | 23 | 3  | 36  | 3  | 215  | 24.6  | 5.19 | 1181.8 | 852.8   | 901.8  | 942.7  | 1054.1  | 869.6  | 927    | 1101.7 |
| S6BGD4   | IgG H chair  | MKHLWFF   | 17 | 3  | 127 | 1  | 234  | 25    | 9.48 | 392.9  | 315.7   | 333.3  | 324.3  | 320.8   | 328.6  | 425.2  | 351.9  |
| V9HWE0   | Annexin O    | MAQVLRG   | 23 | 8  | 39  | 7  | 320  | 35.9  | 5.05 | 1873.1 | 1360.8  | 1963.9 | 1753.5 | 1865.3  | 2098.8 | 1405.2 | 1625.8 |
| Q14982   | Opioid-bin   | MGVCGYLF  | 14 | 4  | 49  | 3  | 345  | 38    | 6.87 | 1496.7 | 1676.5  | 1148.8 | 1532.7 | 1632.2  | 1519.2 | 1356   | 1754.3 |
| P13647   | Keratin, ty  | MSRQSSVS  | 18 | 11 | 34  | 4  | 590  | 62.3  | 7.74 | 21.6   | 9.1     | 7.1    | 8.4    | 16.2    | 22.9   | 22.9   | 11     |
| B4E0X1   | Beta-2-mic   | MSRSVALA  | 27 | 4  | 110 | 4  | 122  | 13.9  | 7.44 | 8072.4 | 27383.9 | 6068.4 | 8892.8 | 12376.4 | 9033.9 | 8006.1 | 8163.5 |
| Q05707   | Collagen al  | MKIFQRKM  | 5  | 7  | 20  | 7  | 1796 | 193.4 | 5.3  | 783.6  | 614.6   | 602.1  | 688    | 701.7   | 696.8  | 716.8  | 720.9  |
| Q76LA1   | CSTB prote   | MMCGAPS   | 46 | 3  | 39  | 3  | 98   | 11.1  | 7.56 | 1792.2 | 2064.4  | 1233   | 1965.6 | 1713.9  | 1753   | 1810   | 1626.1 |
| A8K6A7   | Alpha-man    | MGAYARA   | 7  | 6  | 18  | 6  | 1011 | 113.7 | 7.28 | 1033.4 | 998     | 803.8  | 1030.8 | 1014.1  | 1059.9 | 973.7  | 844.5  |
| Q8N2S1   | Latent-trar  | MPRPGTSC  | 5  | 6  | 27  | 6  | 1624 | 173.3 | 5.43 | 768    | 688     | 519.9  | 703.5  | 698.4   | 661.8  | 604    | 739    |
| V9HVY1   | Epididymis   | MKRMVSW   | 25 | 11 | 29  | 11 | 491  | 55.9  | 8.27 | 2437.8 | 1557.3  | 1260.8 | 1609.1 | 1335.7  | 2788.9 | 1464.8 | 1138.4 |
| P22352   | Glutathion   | MARLLQAS  | 31 | 6  | 71  | 6  | 226  | 25.5  | 8.13 | 2563.6 | 1964.2  | 1772.7 | 2023.5 | 2386.6  | 2515.8 | 2003.7 | 2075.2 |
| P11717   | Cation-ind   | MGAAAGR   | 6  | 13 | 28  | 13 | 2491 | 274.2 | 5.94 | 1217.3 | 1113.5  | 1042.7 | 1078   | 1216.5  | 1059.4 | 956.8  | 1096.8 |
| P39060   | Collagen al  | MAPYPCGC  | 5  | 9  | 38  | 9  | 1754 | 178.1 | 6.01 | 1910.3 | 1467.7  | 1426.3 | 1755.9 | 1902.5  | 2016   | 1518   | 1567.8 |
| P27348   | 14-3-3 pro   | MEKTELIQ  | 16 | 4  | 42  | 1  | 245  | 27.7  | 4.78 | 52.7   | 37.6    | 34.9   | 39     | 41.4    | 41.7   | 39     | 37.8   |
| B1B5Q3   | N-acylsphi   | YRGAVPW   | 28 | 7  | 64  | 1  | 219  | 24.7  | 7.42 | 1559   | 1181    | 1166.2 | 1323.7 | 1705.7  | 1682.7 | 1500.7 | 1108.7 |
| A0A109PS | MS-A1 ligh   | DIQMTQSF  | 32 | 2  | 35  | 1  | 106  | 11.4  | 8.48 | 455    | 431.8   | 370.7  | 444.7  | 431.1   | 411.4  | 428.1  | 411.4  |
| A0A024R3 | Chromoso     | MACAEFSF  | 27 | 7  | 31  | 7  | 315  | 35.1  | 6.7  | 1945.7 | 1614.2  | 1283.9 | 1666.3 | 1650    | 2075.1 | 1584.4 | 1446.6 |
| Q13421   | Mesothelir   | MALPTARF  | 11 | 6  | 47  | 1  | 630  | 68.9  | 6.38 | 1033   | 1805.3  | 751    | 1180.2 | 1765.3  | 1419.5 | 1448   | 1462.1 |
| A8K6D3   | cDNA FLJ7    | MRLHLLLL  | 12 | 9  | 30  | 9  | 879  | 100.9 | 5.52 | 1358.1 | 1103.2  | 988    | 1166.2 | 1415.7  | 1275.2 | 1133.8 | 1294   |
| Q8NDA2   | Hemicentir   | MPGAPLLR  | 2  | 6  | 27  | 6  | 5059 | 541.6 | 5.87 | 741.1  | 706.9   | 610.5  | 663.3  | 641.7   | 672    | 596.5  | 679.7  |
| A0A024R1 | N-acetylga   | MLLKTVLL  | 15 | 5  | 49  | 5  | 411  | 46.5  | 5.19 | 2261.6 | 1739.8  | 1422.2 | 1984.7 | 2477.3  | 2374.5 | 1700.8 | 1806.1 |
| A8K6Q6   | cDNA FLJ7    | MLRRRGSF  | 14 | 3  | 13  | 3  | 534  | 57.3  | 4.91 | 775.7  | 685.6   | 553    | 734.5  | 755.4   | 737.5  | 753.9  | 837.3  |
| P23284   | Peptidyl-pr  | MLRLSERN  | 34 | 7  | 32  | 7  | 216  | 23.7  | 9.41 | 1717.7 | 1360.3  | 1310   | 1516.1 | 1553.2  | 1487.8 | 1248.4 | 1480   |
| Q14126   | Desmoglei    | MARSPGRA  | 9  | 8  | 32  | 8  | 1118 | 122.2 | 5.24 | 794.2  | 800     | 692.7  | 683.2  | 726.5   | 770.9  | 578.8  | 704.3  |
| Q59ED3   | Intercellul  | LIVTCSLQC | 11 | 4  | 50  | 4  | 344  | 38.4  | 7.78 | 1898.1 | 1659.3  | 1243.9 | 1789.1 | 1746.1  | 2055.2 | 2153.6 | 1945.1 |
| B7Z831   | cDNA FLJ5    | MNPPWSV   | 10 | 4  | 46  | 4  | 429  | 47.7  | 8.53 | 2676.3 | 2457.3  | 2803.3 | 2612.9 | 2971.4  | 2351.5 | 2022.2 | 2556.4 |
| P01700   | Immunoglc    | MAGFPLLL  | 25 | 2  | 68  | 1  | 117  | 12.3  | 5.91 | 1520.9 | 1749.6  | 1154.2 | 1661.1 | 1558.9  | 1592.1 | 1656.5 | 1537.5 |
| P29508   | Serpin B3 (  | MNSLSEAN  | 23 | 8  | 23  | 8  | 390  | 44.5  | 6.81 | 561.3  | 590.2   | 447.5  | 790.4  | 582.3   | 466.5  | 684.4  | 519.3  |
| P98172   | Ephrin-B1    | MARPGQR   | 16 | 6  | 65  | 6  | 346  | 38    | 8.94 | 3050.7 | 3759    | 2013.2 | 3383.4 | 3661.4  | 3374.9 | 3188.6 | 3677.8 |
| E7EX88   | Aggrecan c   | MTTLLWVI  | 3  | 8  | 30  | 8  | 2530 | 261.2 | 4.13 | 2024.7 | 1575.7  | 1306.7 | 1555.7 | 1556.8  | 1473.4 | 1417.3 | 1450.7 |
| A2JA16   | Anti-mucin   | DIQMTQSF  | 32 | 2  | 41  | 1  | 107  | 11.6  | 8.46 | 702.5  | 405.7   | 430.9  | 485.7  | 382.2   | 438    | 467.6  | 377.5  |
| Q96J84   | Kin of IRRE  | MLSLLVWI  | 9  | 5  | 38  | 5  | 757  | 83.5  | 5.73 | 1318.9 | 840.3   | 986.8  | 1015.7 | 1048.9  | 1137.5 | 990.5  | 1097.2 |
| P68104   | Elongation   | MGKEKTHI  | 15 | 7  | 28  | 7  | 462  | 50.1  | 9.01 | 1705.1 | 1612.9  | 1168.8 | 1489.6 | 1749.6  | 1777.2 | 1548.6 | 1493.6 |
| A0A087W  | Osteoclast   | MALVLILQ  | 16 | 3  | 74  | 3  | 286  | 30.8  | 6.52 | 3216.3 | 3158.9  | 2454.7 | 3172.2 | 2889.2  | 3037.9 | 2923.9 | 2857.4 |
| A8KAM8   | Platelet-de  | MRLPGAM   | 7  | 6  | 16  | 2  | 1106 | 123.8 | 4.98 | 488.6  | 387.3   | 391.2  | 417.2  | 473.1   | 453.9  | 423.8  | 442.6  |
| O43866   | CD5 antige   | MALLFSLIL | 14 | 4  | 41  | 4  | 347  | 38.1  | 5.47 | 2915.9 | 2302.2  | 2112.3 | 2813.1 | 2794.9  | 2669.5 | 2457.7 | 2812.2 |
| Q12841   | Follistatin- | MWKRWL    | 31 | 9  | 25  | 9  | 308  | 35    | 5.52 | 2137.1 | 2142    | 1770.6 | 1852   | 2137.1  | 1484.7 | 1429.3 | 2041.7 |
| P07204   | Thrombon     | MLGVLVLC  | 13 | 4  | 20  | 4  | 575  | 60.3  | 4.92 | 448.8  | 342.6   | 303.9  | 350.7  | 372.6   | 385.9  | 329.5  | 383.3  |
| I6QTG3   | Glypican 3   | MAGTVRT   | 12 | 6  | 37  | 6  | 580  | 65.5  | 6.37 | 2226.9 | 1935.4  | 1992   | 2312   | 2217.1  | 1851   | 1851.5 | 2113.6 |

|          |              |           |    |    |     |    |      |       |       |        |        |        |        |        |        |        |        |
|----------|--------------|-----------|----|----|-----|----|------|-------|-------|--------|--------|--------|--------|--------|--------|--------|--------|
| P00966   | Argininosu   | MSSKGSVV  | 21 | 10 | 40  | 10 | 412  | 46.5  | 8.02  | 2130.2 | 1520.8 | 1479.7 | 1635.5 | 2091.1 | 1963.9 | 1334.6 | 1519.8 |
| Q13621   | Solute carr  | MSLNNSSM  | 7  | 8  | 22  | 8  | 1099 | 121.4 | 7.39  | 1528.9 | 1645.3 | 1148   | 1545.9 | 1657.9 | 1432.5 | 1143   | 1547.5 |
| P55285   | Cadherin-6   | MRTYRYFL  | 9  | 6  | 19  | 6  | 790  | 88.3  | 4.93  | 916.1  | 913    | 740.3  | 936.4  | 994.5  | 1120.4 | 965    | 1088.4 |
| B0AZL7   | cDNA, FLJ7   | MALRKGGI  | 17 | 9  | 22  | 9  | 605  | 66    | 6.79  | 840.1  | 715.5  | 642.2  | 684.2  | 780.4  | 800.9  | 638.8  | 753.7  |
| A0A075B7 | Protein IGF  | MEFELSWA  | 19 | 2  | 51  | 1  | 117  | 12.9  | 6.51  | 1959.5 | 1475.5 | 1827.5 | 1905.3 | 1850.1 | 1647.3 | 1845.8 | 1917.7 |
| A0A024R3 | Sortilin-rel | MATRSSRR  | 5  | 10 | 26  | 10 | 2214 | 248.3 | 5.53  | 993.6  | 1061.1 | 784.7  | 1063.6 | 1101.1 | 1075   | 876.1  | 1095.4 |
| P31151   | Protein S10  | MSNTQAEI  | 34 | 3  | 35  | 3  | 101  | 11.5  | 6.77  | 956.5  | 741.2  | 659.2  | 1743.2 | 2212   | 1347.3 | 1983.1 | 1722.6 |
| M1VKI3   | Tyrosine-p   | MAPARLFA  | 7  | 4  | 46  | 4  | 746  | 83.1  | 4.97  | 2391.1 | 1882.6 | 1857.1 | 2297.2 | 2672.2 | 2363.3 | 2185.3 | 2867   |
| A0A024R0 | Compleme     | MSACWSFV  | 16 | 8  | 49  | 8  | 559  | 63.2  | 5.52  | 1434.3 | 1387.5 | 1429   | 1288.4 | 1302.7 | 1542.2 | 1810.6 | 1203   |
| Q5KU26   | Collectin-1  | MKDDFAEF  | 7  | 6  | 82  | 6  | 742  | 81.5  | 5.69  | 5931.4 | 6072   | 3325.5 | 4204.7 | 4897.4 | 6084   | 4796.8 | 6136.8 |
| Q9UGN4   | CMRF35-lil   | MWLPWAI   | 10 | 2  | 82  | 2  | 299  | 33.2  | 5.49  | 5299.1 | 5026.6 | 3620.8 | 5487.6 | 5906.4 | 5248   | 5819.6 | 6215.1 |
| B7Z1Z5   | cDNA FLJ5    | MKTIQPKM  | 20 | 5  | 32  | 4  | 355  | 39.2  | 8.05  | 1432.8 | 1276.1 | 1208.8 | 1321.2 | 1382.2 | 1366.6 | 1347.1 | 1546.6 |
| Q9H8L6   | Multimeric   | MILSLLFSL | 7  | 5  | 51  | 5  | 949  | 104.3 | 5.86  | 2527.5 | 1925.8 | 1892.7 | 2305.8 | 2331.8 | 2521.4 | 2189.7 | 2241.8 |
| A8KAQ3   | cDNA FLJ7    | MERPWGA   | 9  | 6  | 18  | 6  | 831  | 92    | 5.74  | 660.4  | 587.1  | 570.5  | 630.7  | 648.9  | 634.6  | 557.9  | 574.4  |
| P40925   | Malate def   | MSEPIRVLY | 18 | 5  | 29  | 5  | 334  | 36.4  | 7.36  | 2093.6 | 1746.1 | 1809.7 | 1889.8 | 2335.3 | 1978.7 | 1738.8 | 1746.5 |
| D3DTX7   | Collagen, t  | MGFPGPKC  | 9  | 6  | 20  | 1  | 885  | 84.7  | 6.24  |        |        |        |        |        |        |        |        |
| A0A109PS | GCT-A8 lig   | DIVMTQSP  | 33 | 2  | 93  | 1  | 112  | 12.5  | 8.5   | 204.4  | 205.8  | 130.5  | 173.9  | 187    | 207.6  | 189.8  | 213.7  |
| P56537   | Eukaryotic   | MAVRASFE  | 23 | 4  | 21  | 4  | 245  | 26.6  | 4.68  | 954.1  | 753.4  | 767.9  | 848.3  | 864    | 941.5  | 893.8  | 805.9  |
| B2R5M3   | cDNA, FLJ9   | MQPTLLLS  | 6  | 3  | 29  | 3  | 677  | 78.2  | 5.1   | 2417.7 | 1964.8 | 2140.9 | 2074.8 | 2335   | 2773.4 | 2251.9 | 2743.8 |
| B7Z1F8   | cDNA FLJ5    | MCPEDSLC  | 34 | 8  | 24  | 1  | 270  | 30.4  | 7.99  |        |        |        |        |        |        |        |        |
| P08123   | Collagen al  | MLSFVDTR  | 7  | 6  | 12  | 6  | 1366 | 129.2 | 8.95  | 706.4  | 689.9  | 526.5  | 683.7  | 683.1  | 830.1  | 687.6  | 599.1  |
| P11047   | Laminin su   | MRGSHRA   | 4  | 6  | 25  | 6  | 1609 | 177.5 | 5.12  | 780.4  | 625.4  | 808.8  | 698.5  | 754    | 736.5  | 647.9  | 796.9  |
| A0A024RC | Discoidin d  | MGPEALSS  | 12 | 9  | 22  | 9  | 919  | 101.7 | 6.83  | 890.6  | 650    | 705.5  | 781.8  | 851    | 882.7  | 712.9  | 805.3  |
| P14780   | Matrix met   | MSLWQPLV  | 15 | 9  | 25  | 9  | 707  | 78.4  | 6.06  | 2452.9 | 1530.3 | 1080.4 | 1809.8 | 1992.7 | 2260.4 | 2177.8 | 1798   |
| Q8NCC3   | Group XV p   | MGLHLRPY  | 21 | 7  | 41  | 7  | 412  | 46.6  | 6.73  | 1659.2 | 1849.4 | 1093.8 | 1593.5 | 1799.2 | 1720.4 | 1399.9 | 1266.8 |
| B3KNB4   | cDNA FLJ1    | MVDREQLV  | 16 | 4  | 42  | 1  | 247  | 28.2  | 4.89  | 141.7  | 103    | 143.4  | 120    | 108.6  | 137.7  | 103.4  | 102.1  |
| A0A087W1 | Transthyre   | MASHRLLL  | 26 | 4  | 33  | 4  | 185  | 20.1  | 5.33  | 1516.3 | 1328   | 1449.7 | 1274.6 | 1364.1 | 1482   | 1330   | 1353.3 |
| P19827   | Inter-alpha  | MDGAMGI   | 9  | 6  | 17  | 6  | 911  | 101.3 | 6.79  | 613.5  | 471.8  | 573.4  | 494.3  | 480.6  | 616.8  | 506.3  | 440.1  |
| Q9UN37   | Vacuolar p   | MTTSTLQK  | 23 | 9  | 78  | 6  | 437  | 48.9  | 7.8   | 2674   | 2306.8 | 1958.7 | 2677.2 | 3099.7 | 2625.1 | 2040   | 2652.8 |
| A0A0S2Z4 | Serpin pep   | MAFLGLFS  | 15 | 6  | 36  | 6  | 410  | 46.4  | 4.91  | 1521.9 | 1022.6 | 1249.1 | 1268.9 | 1514.8 | 1478.5 | 1156.2 | 1294.4 |
| P31997   | Carcinoem    | MGPISAPS  | 12 | 3  | 101 | 2  | 349  | 38.1  | 7.39  | 3511.7 | 3216.7 | 2157.7 | 3216.6 | 3211.6 | 2946.1 | 3237.4 | 2990.3 |
| Q96JQ0   | Protocadhe   | MQKELGIV  | 1  | 3  | 20  | 3  | 3298 | 346   | 4.94  | 699.5  | 615.2  | 638.2  | 665.4  | 699.8  | 691.7  | 572.8  | 663.9  |
| P18510   | Interleukin  | MEICRGLR  | 24 | 4  | 11  | 4  | 177  | 20    | 6.19  | 246.8  | 266.9  | 212.5  | 317.9  | 259.6  | 259.3  | 311.8  | 254.6  |
| B3KUI5   | Hyaluronic   | MAAHLPLI  | 18 | 5  | 27  | 5  | 435  | 48.3  | 6.96  | 879.3  | 465.3  | 570.1  | 764.9  | 705.2  | 691.5  | 570.8  | 584    |
| Q15375   | Ephrin type  | MVFQTRYF  | 8  | 6  | 26  | 5  | 998  | 112   | 5.8   | 1043.8 | 781.1  | 651.9  | 832.8  | 827.2  | 753.2  | 663    | 865.6  |
| O15230   | Laminin su   | MAKRLCAC  | 2  | 7  | 23  | 7  | 3695 | 399.5 | 7.02  | 1277.4 | 1384.1 | 1257   | 1455.4 | 1219.5 | 1256.7 | 1030.6 | 1128.4 |
| Q9ULI3   | Protein HE   | MASPRASF  | 7  | 7  | 34  | 7  | 1381 | 147.4 | 6.18  | 3599.4 | 3451.9 | 2855.2 | 3841.9 | 3894.5 | 3781.3 | 3725.1 | 4254.6 |
| A6NI73   | Leukocyte    | MAPWSHP   | 17 | 4  | 19  | 4  | 299  | 32.7  | 6.99  | 1419.2 | 1255.4 | 1066.2 | 1303.5 | 1416.8 | 1362.8 | 1342.9 | 1420.6 |
| Q9Y279   | V-set and i  | MGILLLLL  | 13 | 3  | 32  | 3  | 399  | 44    | 6.35  | 1502.7 | 1657.1 | 914.9  | 1971.7 | 1805.8 | 1450.6 | 1453.1 | 1900.6 |
| S6BAQ4   | IgG H chair  | MEFGLSWV  | 16 | 3  | 127 | 1  | 236  | 25.3  | 8.44  |        |        |        |        |        |        |        |        |
| B2R4R0   | Histone H4   | MSGRGKG   | 50 | 5  | 58  | 5  | 103  | 11.4  | 11.36 | 3267.7 | 2510.2 | 1327.3 | 1672.2 | 1782.4 | 3202.8 | 3831.6 | 1469.8 |

|          |              |           |    |   |     |   |      |       |      |        |         |         |         |         |         |         |         |
|----------|--------------|-----------|----|---|-----|---|------|-------|------|--------|---------|---------|---------|---------|---------|---------|---------|
| Q15485   | Ficolin-2 O  | MELDRAVC  | 16 | 6 | 22  | 6 | 313  | 34    | 6.77 | 2249.4 | 1752.2  | 1371.5  | 1262.5  | 1880.5  | 2102.4  | 2340.7  | 2120.4  |
| P00338   | L-lactate d  | MATLKDQL  | 27 | 8 | 29  | 7 | 332  | 36.7  | 8.27 | 828.7  | 888     | 543.8   | 861.6   | 945.2   | 993.3   | 924.8   | 637.4   |
| Q96S96   | Phosphatic   | MGWTMR    | 25 | 5 | 56  | 5 | 227  | 25.7  | 6.54 | 5705.1 | 5915.8  | 2936.1  | 3959.4  | 4666.1  | 4031.1  | 3204.2  | 4021.4  |
| K7EPJ4   | Cartilage ir | MASLLPLL  | 7  | 7 | 30  | 7 | 1162 | 126.8 | 8.27 | 1309.1 | 1192.2  | 944.6   | 1219.8  | 1235.8  | 1188.1  | 1081.7  | 1220.8  |
| Q7KYR7   | Butyrophili  | MESAAALH  | 8  | 6 | 68  | 6 | 527  | 59.6  | 6.48 | 5880.3 | 4902.5  | 4426.9  | 5645.1  | 5865.5  | 5946.4  | 5279.6  | 6869.3  |
| A0A087W  | Mucosal ac   | MDFGLALL  | 11 | 3 | 42  | 3 | 406  | 42.4  | 5.07 | 1635   | 1422.1  | 1311.7  | 1740    | 1698.8  | 2030.6  | 1689.1  | 1956.5  |
| A0A024RD | Lymphocyt    | MARGSVSI  | 14 | 8 | 34  | 5 | 627  | 70.2  | 5.43 | 1083.2 | 784     | 516.2   | 823.9   | 836.9   | 886.5   | 1142.3  | 623.7   |
| A0A0A0N0 | CNTFR isof   | MAAPVPW   | 11 | 4 | 42  | 4 | 380  | 41.5  | 6.86 | 3060.4 | 2938.5  | 2418.7  | 2809.6  | 2998.2  | 2725.8  | 2676.7  | 3175.4  |
| B2R8I2   | cDNA, FLJ9   | MKALIAAL  | 12 | 7 | 24  | 7 | 525  | 59.5  | 7.44 | 1246   | 1141.8  | 840.1   | 1117.5  | 1001.6  | 1314.3  | 1197    | 932.5   |
| P29323   | Ephrin type  | MALRRLGA  | 7  | 5 | 15  | 5 | 1055 | 117.4 | 6.55 | 229.4  | 239.8   | 184.5   | 236.1   | 243.8   | 239.6   | 195.7   | 252     |
| P68363   | Tubulin alp  | MRECISIHV | 16 | 5 | 12  | 1 | 451  | 50.1  | 5.06 | 20.9   | 19      | 11.8    | 18.9    | 18.5    | 19.7    | 16.4    | 15.9    |
| A8K6K4   | cDNA FLJ7    | MTLLWCV   | 11 | 7 | 27  | 7 | 570  | 65.4  | 8.22 | 1483.1 | 1504.4  | 1208.4  | 1401.7  | 1489    | 1408.5  | 1384.1  | 1392.7  |
| P51688   | N-sulphogl   | MSCPVPAC  | 11 | 5 | 30  | 5 | 502  | 56.7  | 6.95 | 917.1  | 561.5   | 525.9   | 676.5   | 662.6   | 827.3   | 624.4   | 582.5   |
| B7Z1K5   | Tubulin alp  | MTAWFNG   | 13 | 5 | 13  | 1 | 519  | 57.7  | 5.07 | 465.8  | 406.6   | 342.3   | 353.2   | 397.9   | 385.2   | 328.3   | 325.4   |
| S6BAP4   | IgG H chair  | MDWTWR    | 22 | 4 | 123 | 1 | 275  | 29.4  | 8.51 | 26.2   | 36.7    | 23.2    | 53.7    | 20.7    | 13.6    | 19.7    | 14.6    |
| B4DPQ0   | Compleme     | MSVRFRCV  | 10 | 6 | 19  | 4 | 719  | 81.8  | 6.37 | 283.8  | 233.2   | 191.1   | 247.3   | 237.5   | 244.2   | 251.2   | 239.7   |
| B7ZKQ8   | PODXL pro    | MRCALALS  | 9  | 5 | 43  | 5 | 560  | 58.8  | 5.49 | 3202.6 | 2843.3  | 2466.7  | 3141.1  | 3425.7  | 3439.7  | 2693.7  | 3403.1  |
| O75487   | Glypican-4   | MARFGLPA  | 8  | 4 | 17  | 4 | 556  | 62.4  | 6.68 | 606.7  | 544     | 536     | 593.3   | 617.9   | 615.2   | 507.1   | 581.4   |
| B2R701   | cDNA, FLJ9   | MVELHNLV  | 16 | 6 | 45  | 1 | 428  | 45.7  | 5.38 | 25.1   | 30      | 20.1    | 25.4    | 24.7    | 23.6    | 23.4    | 30.3    |
| P52758   | Ribonuclea   | MSSLIRRV  | 27 | 3 | 22  | 3 | 137  | 14.5  | 8.68 | 669.4  | 526.4   | 508     | 569.9   | 663.4   | 621.3   | 498.3   | 539.6   |
| G3XAK1   | Hepatocyt    | MGLWWV    | 14 | 8 | 29  | 8 | 725  | 81.9  | 7.8  | 1531.2 | 1406.8  | 1271    | 1426.6  | 1515.2  | 1369.1  | 1451.5  | 1427.9  |
| V9HWC7   | Epididymis   | MPGGLLLC  | 27 | 6 | 41  | 6 | 224  | 25    | 6.38 | 1758.3 | 1425.6  | 1328.4  | 1458.9  | 1803.2  | 1594.8  | 1296.7  | 1373.1  |
| Q9H665   | IGF-like far | MGPGRCLI  | 11 | 3 | 51  | 3 | 355  | 37.9  | 7.08 | 1816.2 | 1642.3  | 1422.6  | 1945.8  | 1979.3  | 1855.6  | 1805.5  | 1955.6  |
| A0A125U0 | MS-F1 hea    | EVQLVESG  | 17 | 2 | 32  | 1 | 126  | 13.5  | 8.16 |        |         |         |         |         |         |         |         |
| B8ZWD9   | Diazepam     | MGWTSLC   | 31 | 3 | 46  | 3 | 144  | 16.1  | 5.05 | 1883   | 1852.7  | 1540.4  | 1782.7  | 1839.2  | 1173.8  | 1657.3  | 1884.1  |
| P25940   | Collagen al  | MGNRRDL   | 2  | 2 | 9   | 2 | 1745 | 172   | 6.87 | 269    | 230.1   | 314.2   | 250.9   | 252.9   | 229.1   | 235.6   | 258.1   |
| O75942   | Major prio   | MANLGCV   | 10 | 3 | 67  | 3 | 285  | 30.7  | 9    | 3095   | 2786.1  | 2538    | 2956.3  | 3476.6  | 2890.9  | 2604.5  | 3584    |
| PODJD8   | Pepsin A-3   | MKWLLLLC  | 9  | 4 | 250 | 4 | 388  | 42    | 4.41 | 19671  | 18981.8 | 15407.6 | 26908.4 | 24011.9 | 34342.5 | 19145.7 | 22700.4 |
| Q07954   | Prolow-dei   | MLTPPLLL  | 1  | 7 | 31  | 7 | 4544 | 504.3 | 5.39 | 2617.6 | 2206.5  | 1916.2  | 2396.9  | 2485.3  | 2467.2  | 2086.3  | 2483.3  |
| O14745   | Na(+)/H(+)   | MSADAAA   | 19 | 6 | 32  | 6 | 358  | 38.8  | 5.77 | 1769.7 | 1223.1  | 1195.9  | 1283    | 1539.7  | 1621.2  | 1203    | 1481.2  |
| A0A0A0MF | Immunogl     | MEAPAQLL  | 32 | 3 | 90  | 2 | 115  | 12.6  | 5.29 | 111.8  | 105.3   | 81.6    | 106.7   | 108.3   | 110.6   | 98.8    | 103.8   |
| A2NXP8   | Heavy chai   | QVQLVQSC  | 18 | 2 | 31  | 1 | 123  | 13.8  | 9.72 | 93.6   | 87.4    | 107.2   | 87.3    | 100.2   | 88.4    | 97.5    | 85.1    |
| P05546   | Heparin co   | MKHSLNAL  | 9  | 4 | 34  | 4 | 499  | 57    | 6.9  | 964.9  | 883.6   | 856     | 944.4   | 953.3   | 1098.7  | 921.4   | 886.9   |
| P34896   | Serine hyd   | MTMPVNG   | 19 | 7 | 24  | 7 | 483  | 53    | 7.71 | 549.9  | 402.2   | 369.5   | 396.3   | 505.3   | 520.1   | 398.3   | 382.3   |
| A0A024R0 | Guanine nt   | MSELDQLR  | 20 | 6 | 25  | 2 | 340  | 37.4  | 6    | 84.4   | 96.5    | 64.2    | 84.8    | 85.2    | 79.6    | 69.6    | 80.9    |
| A0A087W  | CD177 anti   | MSAVLLLA  | 15 | 6 | 27  | 6 | 437  | 46.4  | 6.01 | 2384.2 | 2654.3  | 2125.4  | 2433.4  | 2768.1  | 2120.2  | 1900.9  | 2340.8  |
| P30044   | Peroxiredo   | MGLAGVC   | 36 | 6 | 33  | 6 | 214  | 22.1  | 8.7  | 982.8  | 936.2   | 647.4   | 893.8   | 979     | 982.2   | 894.2   | 908.4   |
| P05362   | Intercellul  | MAPSSPRP  | 11 | 5 | 34  | 5 | 532  | 57.8  | 7.99 | 1658.4 | 1661.3  | 1164.3  | 1576.1  | 1659.3  | 1764.4  | 1716.8  | 1699.8  |
| B2R7S8   | cDNA, FLJ9   | MVPAWLV   | 11 | 7 | 15  | 7 | 829  | 89.9  | 4.96 | 448.1  | 353.8   | 398.5   | 382     | 440.4   | 426.9   | 424.1   | 426.3   |
| A8K5I6   | cDNA FLJ7    | MPQLLQNI  | 11 | 5 | 24  | 5 | 495  | 53.5  | 6.1  | 2198.4 | 1626.9  | 1167.8  | 1735.9  | 1692.7  | 1782.4  | 2625.8  | 1669.6  |
| P48061   | Stromal ce   | MNAKVVV   | 40 | 4 | 55  | 4 | 93   | 10.7  | 9.88 | 2991.8 | 3366.1  | 2422.9  | 3085.8  | 3437.8  | 3411.9  | 3247.7  | 2541.3  |

|          |               |           |    |    |    |    |      |       |      |        |        |        |        |        |        |        |        |
|----------|---------------|-----------|----|----|----|----|------|-------|------|--------|--------|--------|--------|--------|--------|--------|--------|
| Q6V017   | Protocadherin | MDLAPDR   | 2  | 10 | 19 | 10 | 4981 | 542.4 | 4.94 | 736.9  | 728.6  | 580.1  | 732.5  | 748.9  | 753.1  | 594    | 719.2  |
| Q5U000   | Cathepsin     | MARRGPG   | 18 | 5  | 37 | 5  | 303  | 33.8  | 7.11 | 3462.5 | 4858.2 | 2648.4 | 3428.6 | 3545.8 | 3525.8 | 3138.2 | 3261.1 |
| Q9BRK5   | 45 kDa cal    | MVWPWV    | 17 | 6  | 15 | 6  | 362  | 41.8  | 4.86 | 1225.7 | 966.4  | 980.6  | 1020.7 | 1077.1 | 1197.8 | 955.2  | 1047.6 |
| P55000   | Secreted L    | MASRWAV   | 61 | 3  | 21 | 3  | 103  | 11.2  | 5.33 | 419.5  | 470.6  | 283.5  | 441.1  | 531.6  | 468.5  | 399.8  | 663.4  |
| P54753   | Ephrin type   | MARARPPF  | 8  | 7  | 13 | 7  | 998  | 110.3 | 6.32 | 336    | 295.4  | 292.5  | 336.9  | 354.3  | 347.4  | 331.4  | 352.1  |
| H3BLU2   | Limbic syst   | LRLCLLPT  | 21 | 6  | 17 | 6  | 345  | 38    | 6.86 | 599.9  | 604.2  | 601.9  | 570.2  | 628.9  | 554.6  | 551.7  | 686.6  |
| Q59FR8   | Galectin (F   | ECFLSRNCV | 22 | 5  | 16 | 5  | 258  | 27.1  | 8.41 | 871.6  | 777.7  | 636.1  | 816.7  | 937.7  | 857.6  | 767.2  | 800.5  |
| P16152   | Carbonyl re   | MSSGIHVA  | 18 | 4  | 20 | 4  | 277  | 30.4  | 8.32 | 462.6  | 440.1  | 335.6  | 405.9  | 465.1  | 431    | 341.6  | 385.5  |
| Q9UBX7   | Kallikrein-1  | MQRLRWL   | 14 | 4  | 43 | 4  | 282  | 31    | 8.94 | 2886.9 | 3948.2 | 2651.8 | 2340.6 | 3219.7 | 1809.4 | 1938.5 | 2722.4 |
| A0A0C4DH | Immunoglob    | METPAQLL  | 22 | 2  | 60 | 1  | 116  | 12.5  | 4.59 | 2440.4 | 3158.5 | 1930.8 | 2450.8 | 2371.9 | 2725.7 | 3150.4 | 2826.7 |
| A0A024R6 | Ceroid-lip    | MRRNLRLC  | 15 | 6  | 38 | 6  | 407  | 46.3  | 8.38 | 1759.1 | 1227   | 1184.9 | 1466.2 | 1856.7 | 1724.2 | 1388.2 | 1477.6 |
| P09237   | Matrilysin    | MRLTVLCA  | 26 | 7  | 22 | 7  | 267  | 29.7  | 7.91 | 1379.4 | 1155.3 | 1118.1 | 1249.5 | 1364.3 | 1583.5 | 1306.9 | 1214.8 |
| A0A1A7UP | Galactosar    | MAAVVAA   | 11 | 6  | 26 | 6  | 522  | 57.9  | 6.83 | 1416.8 | 735.3  | 965.6  | 1109.4 | 970.4  | 1418.9 | 1134.1 | 997.6  |
| Q16849   | Receptor-t    | MRRPRRPC  | 4  | 3  | 23 | 3  | 979  | 105.8 | 7.11 | 1406.2 | 1093   | 1081.4 | 1228   | 1230.5 | 1692.9 | 1051.5 | 1455.7 |
| A0A125U0 | MS-C1 hea     | EVQLVESG  | 25 | 3  | 31 | 2  | 118  | 13.1  | 6.07 | 952    | 793.7  | 912.6  | 934.2  | 1014.9 | 876.2  | 991.6  | 1014   |
| Q9HB40   | Retinoid-in   | MELALRRS  | 6  | 3  | 41 | 3  | 452  | 50.8  | 5.81 | 1368.6 | 929.5  | 855    | 1095.1 | 1193.1 | 1368.5 | 883.1  | 904.6  |
| A0A024R0 | Phospholip    | MKPCLMYC  | 12 | 6  | 43 | 6  | 490  | 54.7  | 6.47 | 2048.1 | 1356.2 | 1394.3 | 1730.1 | 1788.3 | 2098.2 | 1540   | 1692.7 |
| A0A0A0M1 | Glucose-6-    | TSGQRPAK  | 12 | 6  | 17 | 6  | 573  | 64.8  | 9.04 | 1311.3 | 995.2  | 873.4  | 1108.3 | 1193.8 | 1075.8 | 975.4  | 945.3  |
| Q02747   | Guanylin C    | MNAFLLSA  | 18 | 3  | 55 | 3  | 115  | 12.4  | 4.59 | 2596.8 | 6099.4 | 2609   | 2855.8 | 3234.9 | 2920.1 | 2336.8 | 2797.1 |
| A0A024R5 | Tumor nec     | MKPSLLCR  | 11 | 3  | 13 | 3  | 430  | 46.1  | 8.35 | 818.8  | 644.6  | 636.5  | 707.2  | 718.3  | 843.3  | 755    | 829.6  |
| A0A024R5 | UDP-GlcNA     | MQMSYAI   | 15 | 5  | 25 | 5  | 415  | 47.1  | 7.2  | 921.3  | 710    | 707.1  | 823.4  | 950.1  | 955.7  | 763.9  | 751    |
| P09564   | T-cell antig  | MAGPPRL   | 10 | 2  | 36 | 2  | 240  | 25.4  | 7.27 | 233.9  | 178.6  | 345.4  | 206    | 250.6  | 226.9  | 245.6  | 271.3  |
| E9PK25   | Cofilin-1 O   | MVSPGHG   | 25 | 5  | 47 | 5  | 204  | 22.7  | 8.34 | 3775.1 | 2670.2 | 2332.4 | 3004.5 | 3519.9 | 3036.5 | 3144.5 | 2864.2 |
| A0A087W  | Receptor-t    | MKPAARE   | 4  | 4  | 21 | 4  | 1342 | 146.5 | 5.62 | 767.1  | 538.4  | 734.8  | 649    | 717.5  | 641.8  | 594    | 682.1  |
| A4GW21   | Programmi     | MIFLLMLS  | 13 | 3  | 37 | 3  | 273  | 30.8  | 7.78 | 1167.3 | 955.3  | 862    | 974.5  | 1115.6 | 1052.4 | 1021.5 | 1066.1 |
| O75339   | Cartilage ir  | MVGTKAW   | 5  | 6  | 23 | 6  | 1184 | 132.5 | 8.41 | 1246.8 | 1186.7 | 939.7  | 1242.8 | 1197.2 | 1059.7 | 1119.3 | 1295.6 |
| A2JA19   | Anti-mucin    | DIQMTQSF  | 38 | 3  | 25 | 2  | 107  | 11.7  | 8.91 | 163    | 168.3  | 124    | 141.4  | 147    | 144.1  | 136.8  | 138.6  |
| Q99497   | Protein de    | MASKRALV  | 46 | 7  | 30 | 7  | 189  | 19.9  | 6.79 | 2063.6 | 1872.6 | 1541.6 | 1821.2 | 2230.1 | 1856.2 | 1771.2 | 1867.4 |
| P18827   | Syndecan-     | MRRRAALW  | 12 | 2  | 58 | 2  | 310  | 32.4  | 4.63 | 1616.4 | 1237.2 | 1224.3 | 1457.9 | 1727.9 | 1534.3 | 1402.8 | 1571.3 |
| Q9NPF0   | CD320 anti    | MSGGWM    | 14 | 4  | 49 | 4  | 282  | 29    | 4.75 | 2926.8 | 2570   | 1843.2 | 2671.6 | 3013.7 | 2917.4 | 2555.1 | 3112.6 |
| P00915   | Carbonic a    | MASPDWC   | 18 | 4  | 31 | 4  | 261  | 28.9  | 7.12 | 1363.4 | 1485.8 | 623.1  | 738.5  | 1088.6 | 923.7  | 994.8  | 816.3  |
| P04155   | Trefoil fact  | MATMENK   | 30 | 2  | 29 | 2  | 84   | 9.1   | 4.35 | 2198.7 | 2084.6 | 2264.9 | 2235.2 | 2342.5 | 3474.8 | 3091.6 | 2289.6 |
| O95998   | Interleukin   | MTMRHNV   | 24 | 5  | 41 | 5  | 194  | 21.1  | 7.39 | 4158.9 | 3175.2 | 3770.7 | 3832.7 | 3758.2 | 4524   | 4016.7 | 4387.8 |
| Q99969   | Retinoic ac   | MRLLIPLA  | 21 | 3  | 21 | 3  | 163  | 18.6  | 9.09 | 505.7  | 508.8  | 437.5  | 486.1  | 541.1  | 481.2  | 430.8  | 449.9  |
| E5RH16   | Platelet-de   | MRLPGAM   | 28 | 5  | 12 | 1  | 239  | 26.5  | 4.7  | 60.5   | 60.7   | 50.1   | 60.9   | 57.2   | 59.8   | 58.9   | 59.7   |
| P62879   | Guanine nu    | MSELEQLR  | 19 | 6  | 27 | 2  | 340  | 37.3  | 6    | 1616.4 | 1366.8 | 1145.1 | 1487.9 | 1739.7 | 1691.8 | 1196.3 | 1397.1 |
| Q01469   | Fatty acid-   | MATVQQL   | 25 | 3  | 34 | 3  | 135  | 15.2  | 7.01 | 934.5  | 1062.7 | 1055.3 | 1016.3 | 918.7  | 1262.6 | 1265.8 | 974.9  |
| V9HWJ5   | Nicotinate-   | MDAEGLA   | 26 | 7  | 17 | 7  | 297  | 30.8  | 6.21 | 1006   | 939.3  | 811.6  | 825.3  | 849.6  | 779.3  | 745.4  | 719.5  |
| P23526   | Adenosylh     | MSDKLPYK  | 19 | 8  | 23 | 8  | 432  | 47.7  | 6.34 | 1319.8 | 1072.6 | 802    | 993.8  | 1252   | 1151.6 | 866.3  | 875    |
| Q8TB96   | T-cell imm    | MAAAGRL   | 12 | 6  | 24 | 6  | 612  | 68.1  | 5.39 | 442.7  | 408.2  | 358.1  | 417.6  | 417.3  | 414.8  | 370    | 386.3  |
| P11279   | Lysosome-     | MAAPGSA   | 8  | 4  | 74 | 4  | 417  | 44.9  | 8.75 | 5279.3 | 4792   | 3348.7 | 5389.9 | 5921.8 | 4877.7 | 5000.5 | 5517   |

|          |              |           |    |   |     |   |      |       |      |        |        |        |        |        |        |        |        |  |
|----------|--------------|-----------|----|---|-----|---|------|-------|------|--------|--------|--------|--------|--------|--------|--------|--------|--|
| D3YTC8   | Leukocyte-   | MSPHPTAL  | 13 | 4 | 83  | 1 | 286  | 31.3  | 5.95 |        |        |        |        |        |        |        |        |  |
| Q9BX67   | Junctional   | MALRRPPF  | 14 | 4 | 18  | 4 | 310  | 35    | 7.59 | 440.1  | 407.4  | 405.7  | 460.6  | 492.1  | 441.2  | 451.5  | 473.9  |  |
| A0A024RD | EGF-like-d   | MPSGCRCL  | 9  | 3 | 15  | 3 | 383  | 40.5  | 6.54 | 541.6  | 467.8  | 478.3  | 493    | 484.3  | 490.5  | 492.3  | 518.3  |  |
| P19438   | Tumor nec    | MGLSTVPC  | 10 | 3 | 10  | 3 | 455  | 50.5  | 6.64 | 539.5  | 540.6  | 434.3  | 510.2  | 496.5  | 524.7  | 466.3  | 513.2  |  |
| Q8NHP8   | Putative pl  | MVGQMYC   | 11 | 6 | 35  | 6 | 589  | 65.4  | 6.8  | 2171.8 | 1924   | 1367.5 | 2235.3 | 2171.5 | 2546   | 2186.1 | 2249.8 |  |
| P05023   | Sodium/po    | MGKGVGR   | 8  | 7 | 11  | 7 | 1023 | 112.8 | 5.49 | 417.9  | 350.6  | 341.9  | 392.1  | 373    | 482.4  | 310.2  | 411.9  |  |
| P20160   | Azurocidin   | MTRLTVLA  | 14 | 3 | 27  | 3 | 251  | 26.9  | 9.5  | 960.4  | 888.2  | 623.3  | 761.4  | 742.3  | 1039.5 | 905.4  | 611.6  |  |
| B7Z5W1   | cDNA FLJ5    | MLQAPRG   | 15 | 5 | 29  | 5 | 303  | 32.8  | 8.85 | 1509.2 | 1737.6 | 1145.9 | 1702   | 1928   | 1726.8 | 1606.1 | 1842.3 |  |
| A0A140VJ | Sulfurtrans  | MASPLCF   | 22 | 5 | 16  | 5 | 297  | 33.2  | 6.6  | 549.9  | 448.9  | 369.6  | 470.2  | 472.9  | 576    | 509.9  | 403.3  |  |
| A0A120HG | GCT-A10 h    | QVQLQESC  | 25 | 3 | 36  | 1 | 127  | 13.6  | 8.81 | 1922.5 | 1638.4 | 1808   | 2062.5 | 1959.5 | 1575.8 | 1823.5 | 1703.1 |  |
| Q5M8T4   | Connective   | MTAASMG   | 15 | 4 | 27  | 4 | 349  | 38    | 7.94 | 1202.6 | 1235.1 | 850.1  | 1162.3 | 1233   | 1104.8 | 1088.2 | 1247.4 |  |
| Q9BRT3   | Migration ;  | MSGEPGQ   | 32 | 4 | 24  | 4 | 115  | 12.4  | 4.37 | 1383.7 | 1089.7 | 975.1  | 1201.4 | 1505.4 | 1386.6 | 1229.2 | 1376.7 |  |
| P49788   | Retinoic ac  | MQPRRQR   | 20 | 5 | 28  | 5 | 294  | 33.3  | 8.51 | 899.5  | 705    | 816.9  | 719.7  | 1750.1 | 767.3  | 819.1  | 965.3  |  |
| P31025   | Lipocalin-1  | MKPLLLAV  | 21 | 4 | 38  | 4 | 176  | 19.2  | 5.58 | 1277.4 | 1986   | 1010.4 | 1643.2 | 1591   | 1342.4 | 1319   | 1461.4 |  |
| A0A075B6 | Protein IGF  | MEAPAQLI  | 23 | 2 | 146 | 1 | 116  | 12.8  | 5.25 | 409.2  | 411.4  | 299.4  | 370.9  | 404    | 428.4  | 433.5  | 489.9  |  |
| Q9BZG9   | Ly-6/neuro   | MTPLTLIL  | 18 | 2 | 152 | 2 | 131  | 14    | 6.71 | 7236.8 | 6557.9 | 4311.3 | 6534.3 | 7253.8 | 6545.8 | 5953.8 | 8447.9 |  |
| A2VCQ3   | ROR1 prot    | RARGCSAR  | 4  | 3 | 16  | 2 | 940  | 104.4 | 7.23 | 890.4  | 802.8  | 658.5  | 911.6  | 893.9  | 1004.3 | 840.5  | 951.7  |  |
| P36957   | Dihydrolipe  | MLSRRCV   | 7  | 3 | 60  | 3 | 453  | 48.7  | 8.95 | 5434.4 | 4096   | 3714.7 | 4739.8 | 5642   | 5392.6 | 4462.1 | 5668.5 |  |
| A0A1C9J6 | B cell rece  | EVQLVQSG  | 23 | 2 | 42  | 2 | 132  | 14.4  | 8.03 |        |        |        |        |        |        |        |        |  |
| A0A024R1 | Testicular s | MSSSPLSKI | 6  | 4 | 8   | 4 | 1058 | 117.8 | 5.76 | 235.7  | 162.6  | 154.9  | 138    | 175.3  | 166    | 144.1  | 133.1  |  |
| Q5JWF2   | Guanine nu   | MGVRNCL   | 5  | 5 | 25  | 4 | 1037 | 111   | 5.03 | 945.2  | 776.6  | 641.8  | 896    | 1042.8 | 887.2  | 665.8  | 907.3  |  |
| A0A0G2JM | Cadherin-r   | MGSWALL   | 6  | 4 | 14  | 4 | 845  | 88.1  | 4.91 | 287.3  | 188.5  | 181.9  | 193.4  | 244.6  | 218.6  | 205    | 249    |  |
| P13473   | Lysosome-    | MVCFRLFP  | 7  | 3 | 113 | 3 | 410  | 44.9  | 5.63 | 7456.8 | 5745.4 | 4694   | 8648.5 | 8424.4 | 8179.5 | 8798.8 | 8958.6 |  |
| A0A024R9 | Proteoglyc   | MAWKTLP   | 4  | 6 | 46  | 1 | 1404 | 151   | 9.5  | 5246.9 | 6325.3 | 3913.3 | 5340.3 | 5389.9 | 4946.1 | 4970.3 | 5168.8 |  |
| P12821   | Angiotensi   | MGAASGR   | 6  | 7 | 21  | 7 | 1306 | 149.6 | 6.39 | 740.1  | 581.7  | 632.1  | 680.9  | 787.1  | 598.5  | 535.7  | 747.9  |  |
| B7Z4R8   | cDNA FLJ5    | MAWKTLP   | 7  | 6 | 45  | 1 | 853  | 89.5  | 8.91 | 41.2   | 45.6   | 32.5   | 41.7   | 43     | 39.1   | 46.8   | 47.5   |  |
| A0A024R9 | Copine III,  | MAAQCVT   | 13 | 6 | 14  | 6 | 537  | 60.1  | 5.85 | 691.8  | 541.4  | 644.4  | 631.9  | 758.2  | 614.3  | 679.3  | 638.9  |  |
| Q5U0I6   | H.sapiens r  | MSSMNPE   | 22 | 4 | 25  | 2 | 205  | 22.7  | 6.21 | 686.2  | 503.6  | 422.1  | 533.1  | 639.4  | 578.7  | 473.3  | 545.7  |  |
| A0A068LL | Ig heavy ch  | QVQLVQSC  | 25 | 3 | 28  | 1 | 120  | 13.3  | 7.93 | 743.5  | 507.5  | 616.8  | 684.1  | 647.7  | 614.2  | 812.6  | 689.2  |  |
| A0A024R8 | RAB14, me    | MATAPYN   | 24 | 5 | 21  | 4 | 215  | 23.9  | 6.21 | 917.1  | 801.1  | 655.2  | 803.2  | 925.2  | 778.1  | 659.6  | 825.9  |  |
| P12814   | Alpha-actir  | MDHYDSQ   | 7  | 6 | 16  | 1 | 892  | 103   | 5.41 |        |        |        |        |        |        |        |        |  |
| Q14393   | Growth arr   | MAPSLSPG  | 8  | 4 | 8   | 4 | 721  | 79.6  | 6.21 | 327.5  | 255.8  | 262.6  | 325.5  | 352.3  | 338    | 295.3  | 343.2  |  |
| P05413   | Fatty acid-  | MVDAFLG   | 53 | 7 | 18  | 7 | 133  | 14.8  | 6.8  | 1274.9 | 1111.2 | 1041.8 | 1062.1 | 1301.3 | 1110.2 | 1069.6 | 1140.6 |  |
| A0A140VJ | Testicular t | MSLDIQSLI | 13 | 5 | 10  | 5 | 461  | 49.9  | 4.82 | 400.6  | 273.3  | 353.4  | 316.9  | 365.3  | 342.3  | 300.4  | 298.5  |  |
| A0A0C4DH | Immunogl     | MDMRVPA   | 40 | 3 | 36  | 1 | 117  | 12.7  | 8.29 | 715.6  | 871    | 621.8  | 757.6  | 637.5  | 602.2  | 673.1  | 606.6  |  |
| Q09666   | Neuroblast   | MEKEETTR  | 6  | 8 | 15  | 8 | 5890 | 628.7 | 6.15 | 663.1  | 632.7  | 568.9  | 614.5  | 578.4  | 594.6  | 610.6  | 587.5  |  |
| P14550   | Alcohol de   | MAASCVLL  | 18 | 5 | 18  | 4 | 325  | 36.6  | 6.79 | 410.8  | 336.3  | 313.8  | 345.3  | 456.9  | 424.2  | 442.7  | 354    |  |
| Q16832   | Discoidin d  | MILIPRLI  | 3  | 2 | 16  | 2 | 855  | 96.7  | 5.36 | 459.6  | 366.7  | 357.2  | 390.8  | 492.4  | 440.7  | 357.1  | 411.7  |  |
| P16284   | Platelet en  | MQPRWAC   | 10 | 6 | 18  | 1 | 738  | 82.5  | 6.99 |        |        |        |        |        |        |        |        |  |
| Q9HC84   | Mucin-5B (   | MGAPSACF  | 2  | 4 | 11  | 4 | 5762 | 596   | 6.64 | 643.3  | 529.5  | 669.4  | 613.9  | 811.7  | 567.5  | 538.9  | 821.2  |  |
| Q92859   | Neogenin (   | MAAERGA   | 6  | 7 | 14  | 7 | 1461 | 159.9 | 6.54 | 786.5  | 701.2  | 594.3  | 757.9  | 790.5  | 746.3  | 683.4  | 797.5  |  |



|          |              |           |    |   |    |   |      |       |      |        |        |        |        |        |        |        |        |
|----------|--------------|-----------|----|---|----|---|------|-------|------|--------|--------|--------|--------|--------|--------|--------|--------|
| Q7Z738   | PCDH12 pr    | MMQLLQL   | 5  | 4 | 8  | 4 | 1187 | 129.2 | 5.26 | 207.9  | 150    | 237.3  | 168.5  | 164.1  | 183.6  | 157.8  | 177.3  |
| Q05CP7   | FABP1 pro    | MSFSGKYC  | 34 | 4 | 33 | 4 | 134  | 15.1  | 9.51 | 2216   | 1837.7 | 1758   | 1669.3 | 2070.9 | 1954.2 | 1419.3 | 1692.4 |
| H0Y3Z8   | Uncharact    | XDLTDEWF  | 15 | 4 | 24 | 4 | 333  | 38.4  | 4.84 | 733.1  | 563.1  | 587    | 656.7  | 701.9  | 724.7  | 661    | 789    |
| A0A024RA | Glutaredox   | MAQEFVN   | 43 | 4 | 35 | 4 | 106  | 11.8  | 8.09 | 764.1  | 984.8  | 498.7  | 703.7  | 803.2  | 812.2  | 651.2  | 717.9  |
| Q99988   | Growth/di    | MPGQELR   | 8  | 2 | 19 | 2 | 308  | 34.1  | 9.66 | 1396.2 | 1660.6 | 867.2  | 1524.9 | 1300.5 | 1446.9 | 1648.4 | 1308.6 |
| A0A087W  | Immunogl     | MRLPAQLL  | 22 | 2 | 78 | 1 | 121  | 13.3  | 4.61 | 333.2  | 383    | 336.3  | 385    | 318.4  | 302.9  | 297.2  | 286.9  |
| Q14315   | Filamin-C C  | MMNNSGY   | 3  | 6 | 9  | 6 | 2725 | 290.8 | 5.97 | 545.7  | 449    | 372.6  | 492.7  | 499.1  | 492.8  | 391.6  | 464.2  |
| A0A0X9V9 | MS-F1 ligh   | DVVMTQS   | 33 | 2 | 34 | 2 | 112  | 12.1  | 5.96 | 1476.4 | 1846.8 | 1351   | 1398.8 | 1486.8 | 2127.1 | 1949   | 1807.9 |
| A0A125U0 | GCT-A1 he    | QVQLQESC  | 25 | 3 | 32 | 1 | 127  | 13.7  | 8.78 | 106.2  | 88.3   | 83.2   | 106.5  | 105.8  | 164.3  | 97.5   | 105.3  |
| Q9BVM4   | Gamma-gli    | MALVFVYG  | 35 | 4 | 20 | 4 | 153  | 17.3  | 6.87 | 840.9  | 684.9  | 543    | 658.2  | 753.6  | 840    | 641.6  | 675.7  |
| Q5IJ48   | Protein cru  | MALARPGT  | 6  | 5 | 21 | 5 | 1285 | 134.2 | 5.55 | 177    | 176.9  | 129.6  | 146.6  | 163    | 191.6  | 151.1  | 157.7  |
| Q14247   | Src substra  | MWKASAG   | 5  | 2 | 35 | 2 | 550  | 61.5  | 5.4  | 1053.6 | 1066.9 | 675.4  | 1153.7 | 1152   | 1409   | 985.8  | 1133.4 |
| A0A075B7 | Platelet en  | MQPRWAC   | 10 | 6 | 19 | 1 | 738  | 82.5  | 6.99 | 1254.7 | 1009.5 | 957.3  | 1165.9 | 1238.1 | 1242.9 | 1141.4 | 1259   |
| P13671   | Compleme     | MARRSVLY  | 6  | 4 | 16 | 4 | 934  | 104.7 | 6.76 | 671.3  | 485.9  | 566    | 606.5  | 682.6  | 704.2  | 721.3  | 601.5  |
| A0A024R3 | Filamin B, I | MPVTEKDL  | 3  | 6 | 21 | 6 | 2622 | 280.3 | 5.94 | 528.1  | 466.7  | 436.8  | 526.7  | 484.2  | 578.2  | 464    | 491.2  |
| Q0IIN1   | Keratin 77   | MSHQFSSC  | 6  | 4 | 32 | 1 | 578  | 61.8  | 5.85 |        |        |        |        |        |        |        |        |
| B2R6X2   | Beta-glucu   | MARGSAV   | 9  | 6 | 14 | 6 | 651  | 74.7  | 7.02 | 799.7  | 637.9  | 550.7  | 661.5  | 939    | 651.2  | 616.5  | 770.1  |
| P05556   | Integrin be  | MNLQPIFM  | 5  | 5 | 20 | 5 | 798  | 88.4  | 5.39 | 1658.1 | 1430.4 | 1255   | 1600.5 | 1658   | 1609   | 1466.7 | 1556.3 |
| P55017   | Solute carr  | MAELPTE   | 7  | 6 | 24 | 6 | 1021 | 113.1 | 7.88 | 602.3  | 476.9  | 399.7  | 580    | 657.4  | 615    | 457.6  | 580.6  |
| P02461   | Collagen al  | MMSFVQK   | 2  | 3 | 14 | 3 | 1466 | 138.5 | 6.61 | 1504.5 | 1365.4 | 890.7  | 2066.9 | 1607.6 | 1983.7 | 2122.8 | 1488.3 |
| A0A0S2Z2 | Annexin (F   | MAKPAQG   | 10 | 7 | 20 | 7 | 673  | 75.8  | 5.6  | 1041.6 | 728    | 683.4  | 838    | 870.3  | 895.2  | 700.5  | 709.9  |
| B1N7B6   | Cryocrysta   | QVQLVESG  | 32 | 3 | 25 | 3 | 120  | 13.2  | 8.48 | 1379.4 | 1130.3 | 1393.4 | 1481.1 | 1286.5 | 1308.8 | 1399.1 | 1256.3 |
| A2NJV5   | Kappa ligh   | MRLPAQLL  | 20 | 2 | 74 | 1 | 121  | 13.2  | 7.28 | 86.5   | 132.6  | 79.8   | 100.4  | 118.7  | 129.3  | 135.3  | 127.9  |
| Q86Y38   | Xylosyltran  | MVAAPCAI  | 2  | 2 | 6  | 2 | 959  | 107.5 | 9.22 | 508.5  | 548.5  | 434.3  | 608.2  | 512.6  | 666.5  | 465.9  | 547.6  |
| Q96AP7   | Endothelia   | MISLPGLV  | 8  | 3 | 15 | 3 | 390  | 41.2  | 9.32 | 949.4  | 1030.7 | 771.5  | 983.9  | 1078.9 | 1073.7 | 948.1  | 1100.2 |
| A0A024RD | G protein-c  | MKSPRRTT  | 5  | 6 | 17 | 6 | 1346 | 149.3 | 6.65 | 325.9  | 314.8  | 275.7  | 293.6  | 341.7  | 312    | 274    | 327.9  |
| Q16651   | Prostasin C  | MAQKGVLL  | 4  | 1 | 16 | 1 | 343  | 36.4  | 5.85 | 1888.9 | 2031.5 | 1920.1 | 1707.8 | 2054.7 | 1905.5 | 1788.3 | 2330.8 |
| P12429   | Annexin A3   | MASIWVG   | 22 | 6 | 14 | 6 | 323  | 36.4  | 5.92 | 175.6  | 148.9  | 160    | 183.5  | 145.8  | 149.1  | 138.5  | 120.9  |
| A8K0I8   | cDNA FLJ7    | MQPRRAQ   | 3  | 2 | 12 | 2 | 737  | 78.5  | 5.21 | 553.4  | 460.4  | 432.1  | 512.7  | 562    | 518.6  | 462.7  | 574    |
| P01766   | Immunogl     | MELGLSWY  | 19 | 2 | 19 | 1 | 116  | 12.5  | 7.08 | 143.9  | 143.3  | 137.3  | 178.7  | 125.9  | 133.1  | 141.5  | 115.1  |
| O60888   | Protein Cu   | MSGGRAP   | 16 | 2 | 36 | 2 | 179  | 19.1  | 5.5  | 802.2  | 671.5  | 646.8  | 717.4  | 852.5  | 839.7  | 722    | 922.3  |
| B2R657   | Annexin O    | MSYPGYPP  | 7  | 3 | 7  | 3 | 488  | 52.6  | 5.52 | 87.2   | 56     | 72.6   | 72     | 85.5   | 75.1   | 64.4   | 64.6   |
| Q6FIE5   | PHP14 pro    | MAVADLAI  | 36 | 4 | 22 | 4 | 125  | 13.8  | 6.07 | 2307.3 | 1936.1 | 1452.8 | 2029.7 | 2186.5 | 1953.3 | 2081.4 | 1824.2 |
| B2RAM2   | cDNA, FLJ9   | MDATALEF  | 7  | 5 | 16 | 5 | 813  | 92.6  | 7.65 | 772.1  | 718.3  | 675.4  | 724.5  | 780.6  | 623    | 528.4  | 670.9  |
| O00337   | Sodium/nu    | MENDPSRF  | 3  | 1 | 26 | 1 | 649  | 71.5  | 7.59 | 189    | 148.6  | 147.2  | 183.1  | 184    | 125.3  | 147.1  | 198.9  |
| A8K987   | cDNA FLJ7    | MAEKPKLF  | 18 | 5 | 71 | 1 | 222  | 25.7  | 9    | 4857.3 | 3701   | 2361.3 | 3403.1 | 5215.5 | 3920.5 | 2928.1 | 3254.9 |
| P08263   | Glutathion   | MAEKPKLF  | 18 | 5 | 78 | 1 | 222  | 25.6  | 8.88 | 515.5  | 439.4  | 348.2  | 386.9  | 470.7  | 586.6  | 350.8  | 331    |
| A0A024R5 | Dihydroxy    | MTSKKLVN  | 11 | 5 | 13 | 5 | 575  | 58.9  | 7.49 | 448.1  | 386.8  | 288.1  | 368.8  | 456.2  | 513    | 339.9  | 347.7  |
| P40189   | Interleukin  | MLTLQTW   | 6  | 5 | 24 | 5 | 918  | 103.5 | 5.95 | 1502.2 | 1535.8 | 1236.8 | 1489   | 1571.1 | 1537.7 | 1304.8 | 1487.4 |
| Q5NV90   | V2-17 prot   | SYELTQPPS | 41 | 3 | 20 | 3 | 97   | 10.4  | 4.59 | 719.5  | 731.6  | 703    | 678.5  | 774.5  | 746.6  | 714.1  | 601.5  |
| P22528   | Cornifin-B   | MSSQQQK   | 44 | 3 | 24 | 1 | 89   | 9.9   | 8.48 | 1716.5 | 2446.7 | 1832.6 | 2536.8 | 2307.6 | 1763.9 | 2761.7 | 2109   |

|          |               |           |    |   |     |   |      |       |      |         |         |        |         |        |        |         |         |
|----------|---------------|-----------|----|---|-----|---|------|-------|------|---------|---------|--------|---------|--------|--------|---------|---------|
| Q9UN70   | Protocadherin | MVPEAWR   | 6  | 6 | 25  | 6 | 934  | 101   | 5.21 | 2723.8  | 2196.7  | 2021.5 | 2364.5  | 2665.5 | 2478.2 | 2172.8  | 2507.6  |
| A8MTF8   | Protein FA    | MKSHRGD   | 17 | 4 | 16  | 4 | 258  | 28.3  | 8.73 | 701.2   | 620.2   | 492.3  | 644.8   | 757    | 662    | 621     | 692.4   |
| P20336   | Ras-related   | MASATDSF  | 20 | 4 | 15  | 1 | 220  | 25    | 5.03 | 288     | 323.8   | 274.1  | 270.9   | 263.1  | 213.9  | 203.9   | 264.4   |
| Q8WVQ1   | Soluble cal   | MPVQLSEF  | 14 | 4 | 14  | 4 | 401  | 44.8  | 6.09 | 330.6   | 258.7   | 273.8  | 272.7   | 352.1  | 284    | 239.9   | 308.3   |
| B8PRF2   | CD160 anti    | MLLEPGRC  | 15 | 3 | 21  | 3 | 234  | 26    | 8.56 | 721.9   | 696     | 675.2  | 659.5   | 763.6  | 935.9  | 605     | 779.3   |
| A0A0A0MF | Coagulation   | MFPGCPR   | 1  | 3 | 30  | 3 | 2229 | 252.1 | 6.05 | 300.9   | 315.4   | 245    | 312     | 361.4  | 336.1  | 333.1   | 358.9   |
| Q7LBR1   | Charged m     | MSNMEKH   | 19 | 5 | 37  | 5 | 199  | 22.1  | 8.1  | 2648.7  | 2505.2  | 2824   | 3025.5  | 3153.4 | 2759   | 2295.7  | 2977.5  |
| P13797   | Plastin-3 O   | MDEMATT   | 9  | 6 | 20  | 3 | 630  | 70.8  | 5.6  | 72.7    | 101.6   | 41.1   | 42.1    | 40.3   | 39.3   | 40.6    | 38.2    |
| Q53G35   | Phosphogl     | MAAYKLV   | 16 | 3 | 10  | 3 | 254  | 28.8  | 7.18 | 281.4   | 242.1   | 226.4  | 255.6   | 219.9  | 238.6  | 228     | 231.3   |
| Q9NY97   | N-acetylac    | MSVGRRI   | 9  | 3 | 14  | 3 | 397  | 46    | 8.54 | 919.2   | 824.8   | 809.8  | 820.4   | 864.8  | 836.3  | 737.5   | 721.8   |
| A0A024R1 | LIM and SH    | MNPNCAR   | 16 | 3 | 30  | 3 | 261  | 29.7  | 7.05 | 403.7   | 359.7   | 339.5  | 378.4   | 432.5  | 367.5  | 354.1   | 429.2   |
| Q9Y509   | VH3 protei    | QVHLVESG  | 16 | 2 | 77  | 1 | 147  | 15.8  | 8.38 | 906.8   | 727.1   | 827.2  | 808.2   | 768.7  | 750.8  | 821.1   | 704.9   |
| G8JLH6   | Tetraspani    | MPVKGGT   | 7  | 3 | 62  | 3 | 228  | 25.4  | 6.52 | 6145.2  | 6435.4  | 5012.1 | 7231.1  | 8554.5 | 5538.3 | 4966.4  | 7477.1  |
| Q9BTY2   | Plasma alp    | MRPQELPF  | 11 | 5 | 18  | 5 | 467  | 54    | 6.25 | 746.3   | 610.9   | 619.2  | 687     | 796.3  | 708.6  | 715     | 625.1   |
| P22732   | Solute carr   | MEQQDQS   | 6  | 3 | 22  | 3 | 501  | 54.9  | 6.04 | 1530    | 1084.8  | 1228   | 1507.9  | 1666.2 | 1386.6 | 903.4   | 1407.4  |
| P35443   | Thrombosy     | MLAPRGA   | 9  | 5 | 9   | 4 | 961  | 105.8 | 4.68 | 119.7   | 124.8   | 148.9  | 135.3   | 123.5  | 121.2  | 138.8   | 147.1   |
| A0A0A1HA | H.sapiens r   | MASVTDGI  | 22 | 4 | 14  | 1 | 219  | 24.7  | 5.11 |         |         |        |         |        |        |         |         |
| Q9UL84   | Myosin-re     | EVQLVESG  | 28 | 3 | 29  | 2 | 122  | 13.6  | 8.46 | 307.4   | 208     | 219    | 216.9   | 226.7  | 233    | 343.2   | 216.8   |
| Q9NQ36   | Signal pept   | MGVAGR    | 3  | 2 | 7   | 2 | 999  | 109.9 | 6.65 | 589     | 696.4   | 445.5  | 694     | 649.5  | 673.3  | 556.2   | 688.2   |
| A8K2Q6   | Peptidyl-pr   | MGPGRLL   | 10 | 2 | 28  | 2 | 212  | 22.7  | 8.4  | 821.1   | 599.6   | 531.2  | 791.4   | 838.2  | 931.8  | 658.8   | 712.3   |
| Q14894   | Ketimine r    | MSRVPAFL  | 12 | 3 | 13  | 3 | 314  | 33.8  | 5.14 | 566.4   | 422.1   | 567.6  | 444.8   | 511.4  | 480.9  | 432.6   | 400.1   |
| Q9ULV1   | Frizzled-4 (  | MAWRGAC   | 4  | 2 | 39  | 2 | 537  | 59.8  | 7.27 | 2061.7  | 2021.7  | 1398.8 | 2209.9  | 2362.7 | 1983.4 | 1839.2  | 2293.8  |
| Q9Y2S2   | Lambda-cr     | MASSAAGC  | 13 | 4 | 25  | 4 | 319  | 35.4  | 6.18 | 1726.9  | 870.9   | 639.3  | 725.1   | 893.1  | 1034.1 | 693     | 653.3   |
| Q6UX71   | Plexin dom    | MARFPKAD  | 12 | 6 | 13  | 6 | 529  | 59.5  | 6.46 | 1042.3  | 812.5   | 697.6  | 857.4   | 847.8  | 987.5  | 751.1   | 879.6   |
| P04066   | Tissue alph   | MRAPGMR   | 9  | 4 | 22  | 4 | 466  | 53.7  | 6.84 | 782     | 578.6   | 594.6  | 729.5   | 854.4  | 783.6  | 660.8   | 592.1   |
| Q9H6X2   | Anthrax to    | MATAERRA  | 10 | 5 | 12  | 5 | 564  | 62.7  | 7.61 | 915.6   | 1105.3  | 892.6  | 928.1   | 932.3  | 905.1  | 923.1   | 962.8   |
| P20138   | Myeloid ce    | MPLLLLLPL | 12 | 4 | 13  | 4 | 364  | 39.8  | 8.38 | 975.8   | 822.3   | 754    | 875     | 806.8  | 915.9  | 748.2   | 880.8   |
| E7EQR8   | Protein YIP   | MATTAAPA  | 3  | 1 | 216 | 1 | 356  | 38.9  | 5.6  | 21072.3 | 17617.5 | 18663  | 21307.5 | 22466  | 21160  | 20061.3 | 23740.1 |
| A0A024RE | Prominin 2    | MKHTLALL  | 8  | 6 | 20  | 6 | 834  | 91.9  | 6.24 | 1009    | 945.6   | 802.3  | 1009.4  | 1102.6 | 1014.6 | 764.5   | 960.6   |
| P35321   | Cornifin-A    | MNSQQQK   | 44 | 3 | 27  | 1 | 89   | 9.9   | 8.48 | 339.1   | 372.9   | 500.2  | 379.1   | 361.8  | 330.9  | 437.9   | 378.6   |
| P36896   | Activin rec   | MAESAGAS  | 6  | 2 | 37  | 2 | 505  | 56.8  | 7.03 | 1670    | 1388.4  | 1232.7 | 1677.5  | 1893.2 | 1729.5 | 1604.6  | 2014    |
| Q9H444   | Charged m     | MSVFGKLF  | 25 | 5 | 11  | 5 | 224  | 24.9  | 4.82 | 478.7   | 411.2   | 382    | 419.4   | 476.3  | 460.7  | 348.4   | 418.7   |
| A6NMH8   | Tetraspani    | MWCGWS    | 13 | 2 | 10  | 2 | 274  | 29.8  | 6.92 | 203.9   | 202.5   | 155    | 194.5   | 184.8  | 193.4  | 159.1   | 183.4   |
| Q8WV92   | MIT domai     | MAKSGLR   | 21 | 4 | 6   | 4 | 249  | 29.3  | 8    | 385.2   | 284     | 348.4  | 363.2   | 398.2  | 463.8  | 295.9   | 314.4   |
| A8K4E0   | cDNA FLJ7     | MDPARKA   | 15 | 4 | 8   | 4 | 346  | 36    | 7.75 | 401.7   | 325.8   | 258.6  | 369.2   | 335.7  | 380.5  | 323.5   | 377.6   |
| A0A0X9TO | GCT-A5 he     | EVQLVQSG  | 26 | 3 | 22  | 3 | 114  | 12.7  | 7.96 | 1363.3  | 1109.9  | 1365   | 1454.9  | 1610.6 | 1234.6 | 1571.4  | 1288.3  |
| Q8N7G1   | Purine nuc    | MENGYTYE  | 19 | 5 | 11  | 5 | 293  | 32.5  | 7.21 | 184.8   | 121.1   | 132.2  | 134.9   | 177.7  | 163.1  | 132.4   | 121.9   |
| A8K8G3   | cDNA FLJ7     | MRAPGCG   | 12 | 5 | 11  | 5 | 424  | 46.8  | 4.83 | 1113.3  | 939     | 913.6  | 1008.8  | 1122.8 | 1067   | 898.4   | 1058.4  |
| D6RAR4   | Hepatocyt     | MGRWAW    | 11 | 6 | 22  | 6 | 662  | 71.4  | 7.05 | 1206.9  | 1120    | 1146   | 1360.3  | 1370   | 1166.7 | 1038.7  | 1403.6  |
| Q9NP29   | Microfibril   | MVLQTQV   | 18 | 2 | 67  | 1 | 130  | 14.1  | 9.64 | 570.7   | 720.9   | 475.9  | 681.6   | 792.3  | 561.8  | 614.9   | 648.7   |
| B2R7D2   | cDNA, FLJ9    | MLRAPGCL  | 13 | 5 | 9   | 5 | 487  | 55.1  | 7.97 | 294.3   | 201.4   | 207    | 188.3   | 223    | 258.5  | 184.8   | 181.1   |

|          |              |           |    |   |    |   |      |       |      |        |        |        |        |        |        |        |        |
|----------|--------------|-----------|----|---|----|---|------|-------|------|--------|--------|--------|--------|--------|--------|--------|--------|
| Q8NC42   | E3 ubiquitin | MAWRRRE   | 13 | 4 | 22 | 4 | 400  | 43.1  | 6.54 | 1022.1 | 916.9  | 837.9  | 985.8  | 942.7  | 1003.4 | 905    | 998.1  |
| P27105   | Erythrocyt   | MAEKRHTF  | 25 | 6 | 16 | 6 | 288  | 31.7  | 7.88 | 561.6  | 422.1  | 399.2  | 493.6  | 496.4  | 522.5  | 417.1  | 432    |
| P81172   | Hepcidin O   | MALSSQIW  | 19 | 1 | 63 | 1 | 84   | 9.4   | 8.81 | 2372.8 | 2930.4 | 1814.3 | 2823.5 | 2868.3 | 2697.5 | 2796.6 | 2320.3 |
| Q9HBR0   | Putative sc  | MTAAAASM  | 5  | 4 | 7  | 4 | 1119 | 119.7 | 5.73 | 217.9  | 174.9  | 171.3  | 211.2  | 219.9  | 230.7  | 158.7  | 203.3  |
| Q5VW32   | BRO1 dom     | MTHWFHR   | 15 | 5 | 13 | 5 | 411  | 46.4  | 7.65 | 605.9  | 544.8  | 530.8  | 617    | 739.6  | 672.3  | 546.9  | 680.8  |
| Q15286   | Ras-relatec  | MARDYDH   | 15 | 3 | 23 | 1 | 201  | 23    | 8.29 |        |        |        |        |        |        |        |        |
| A0A075B6 | Immunogl     | MAWALLLI  | 25 | 2 | 14 | 2 | 118  | 12.4  | 4.82 | 900.5  | 1060.4 | 755.2  | 1166.2 | 1020.6 | 1022   | 1031.3 | 1136.9 |
| Q0ZCF6   | Immunogl     | PLVQLVES  | 18 | 2 | 21 | 1 | 129  | 14.5  | 8.78 |        |        |        |        |        |        |        |        |
| P10645   | Chromogra    | MRSAAVLA  | 5  | 2 | 26 | 2 | 457  | 50.7  | 4.6  | 1315.1 | 1390.3 | 847.6  | 1127.3 | 1153.3 | 1322.4 | 899.4  | 1150   |
| A2IPI6   | HRV Fab O    | MAELQMT   | 20 | 2 | 44 | 1 | 113  | 12.4  | 9.41 | 275.8  | 326.1  | 265.7  | 311.2  | 295.8  | 329.5  | 338.2  | 288.1  |
| P01040   | Cystatin-A   | MIPGGLSE  | 38 | 3 | 20 | 3 | 98   | 11    | 5.5  | 1120.2 | 1185.4 | 1183.6 | 1327.6 | 1145   | 1292.5 | 1320.2 | 1303.1 |
| Q14019   | Coactosin-   | MATKIDKE  | 23 | 4 | 32 | 4 | 142  | 15.9  | 5.67 | 3304   | 3709   | 2098.1 | 2691.4 | 3876.4 | 2990.7 | 2315.1 | 2695.4 |
| B0YIW2   | Apolipoprc   | MGTWGAF   | 29 | 3 | 12 | 3 | 117  | 12.8  | 8.18 | 689    | 823    | 543.1  | 534.9  | 585.2  | 744.4  | 578.8  | 535.4  |
| Q9UKU6   | Thyrotropi   | MGEDDAA   | 7  | 6 | 14 | 6 | 1024 | 116.9 | 6.99 | 567.4  | 457.8  | 343.5  | 411.3  | 412.6  | 399.1  | 332.2  | 353.4  |
| A0A158RF | RAB7, men    | MTSRKKVL  | 18 | 3 | 13 | 3 | 207  | 23.5  | 6.7  | 376.1  | 256.4  | 293.9  | 314.5  | 335.4  | 336.9  | 291.1  | 305.3  |
| Q9GZM7   | Tubulointe   | MWRCPLG   | 12 | 4 | 12 | 4 | 467  | 52.4  | 6.99 | 416.6  | 336    | 312.1  | 391.7  | 357.4  | 343.1  | 346.4  | 355.7  |
| P55259   | Pancreatic   | MPLMER    | 9  | 4 | 23 | 4 | 537  | 59.4  | 5.24 | 152.2  | 187.9  | 136.9  | 168    | 162.6  | 120.5  | 134.8  | 152.2  |
| Q8N289   | cDNA FLJ3    | METCAGPH  | 11 | 3 | 10 | 2 | 295  | 32.1  | 5.91 | 132.1  | 133.3  | 127.7  | 161    | 140.4  | 113.5  | 112.5  | 130.7  |
| Q8WW52   | Protein FA   | MVCREQLS  | 7  | 4 | 17 | 4 | 585  | 64    | 6.67 | 989.6  | 689    | 567    | 737.5  | 830.1  | 912.5  | 609.1  | 851.1  |
| A0A024R1 | RAB5C, me    | MAGRGA    | 22 | 4 | 13 | 4 | 216  | 23.5  | 8.41 | 473.8  | 354.3  | 363.6  | 469.5  | 529.5  | 408.8  | 345.6  | 412.1  |
| A0A090KF | HLA class I  | MRVMAPR   | 13 | 4 | 7  | 2 | 366  | 40.9  | 6    | 171.7  | 135.1  | 103.3  | 147.5  | 142.7  | 137.3  | 120.9  | 138.3  |
| P20062   | Transcobal   | MRHLGAF   | 14 | 6 | 10 | 6 | 427  | 47.5  | 7.01 | 313.5  | 235.1  | 220.3  | 266.1  | 274.3  | 299.1  | 246.5  | 241.5  |
| Q5IWS5   | Intelectin 1 | MNQLSFL   | 16 | 4 | 13 | 4 | 313  | 35    | 5.82 | 662.1  | 403    | 407.9  | 509.9  | 416.2  | 593.9  | 316.1  | 793.9  |
| P15121   | Aldose red   | MASRLLN   | 12 | 4 | 11 | 3 | 316  | 35.8  | 6.98 | 178.4  | 196.8  | 143.8  | 186    | 255.8  | 232.8  | 304.2  | 209.9  |
| O43692   | Peptidase    | MIAISAVSS | 8  | 2 | 33 | 1 | 258  | 29    | 8.03 | 2388.7 | 1711.9 | 1882.8 | 2695.6 | 2144.6 | 2346.3 | 2147.8 | 2345.7 |
| O95460   | Matrilin-4   | MRGLLCW   | 4  | 2 | 21 | 2 | 622  | 68.4  | 6.1  | 769.4  | 532.9  | 555    | 706.2  | 654.5  | 616.9  | 491.1  | 789.3  |
| B4E1U9   | cDNA FLJ5    | MQTIKCVV  | 16 | 3 | 7  | 3 | 236  | 26.5  | 7.59 | 502.9  | 394.2  | 338.7  | 400.9  | 534.3  | 441.2  | 423.8  | 373.9  |
| V9HW62   | Lactoylglut  | MAEPQPPS  | 22 | 5 | 26 | 5 | 184  | 20.7  | 5.47 | 1304.7 | 1214.5 | 901.8  | 1117.3 | 1269.3 | 1140.9 | 975.5  | 1116.1 |
| Q2UY09   | Collagen al  | MWNRVYFV  | 2  | 2 | 30 | 2 | 1125 | 116.6 | 6.4  | 1460.8 | 1358.3 | 988.9  | 1457.2 | 1426.5 | 1433.7 | 1260.7 | 1588.2 |
| Q06481   | Amyloid-lik  | MAATGTA   | 8  | 5 | 11 | 5 | 763  | 86.9  | 4.79 | 922.6  | 901.1  | 712.4  | 887.7  | 820.9  | 885.7  | 697.6  | 659.8  |
| Q15746   | Myosin lig   | MGDVKLV   | 1  | 2 | 19 | 2 | 1914 | 210.6 | 6.15 | 1140.3 | 958.7  | 861.9  | 1077.8 | 1058.3 | 1254.5 | 1083.5 | 1162.6 |
| P21399   | Cytoplasm    | MSNPFAHI  | 6  | 4 | 8  | 4 | 889  | 98.3  | 6.68 | 385.3  | 309.4  | 258.9  | 321.4  | 372.5  | 330    | 271.2  | 281.1  |
| P02792   | Ferritin lig | MSSQIRQN  | 18 | 3 | 7  | 3 | 175  | 20    | 5.78 | 159.7  | 121.1  | 113.5  | 119.3  | 109.9  | 109.6  | 129.7  | 100.4  |
| P04899   | Guanine nu   | MGCTVSAF  | 10 | 3 | 20 | 2 | 355  | 40.4  | 5.54 | 172.2  | 160.6  | 149.7  | 205    | 221.7  | 157.2  | 160.8  | 147.3  |
| V9HW91   | Epididymis   | MTSFRAL   | 22 | 4 | 7  | 4 | 276  | 30.6  | 7.21 | 119.5  | 65     | 66.2   | 66.4   | 86.5   | 90.5   | 57.3   | 65.2   |
| A8K037   | cDNA FLJ7    | MEGAPPG   | 8  | 3 | 15 | 3 | 330  | 36.8  | 4.82 | 774.5  | 651.3  | 508.3  | 670.9  | 654.8  | 785    | 593.8  | 651.7  |
| A6NC48   | ADP-ribosy   | MAAQGCA   | 10 | 3 | 12 | 3 | 333  | 37.5  | 7.97 | 279    | 248.2  | 202.9  | 261.6  | 249.8  | 246.8  | 230.9  | 286.2  |
| Q53GE4   | Leucine ric  | MKVTGITIL | 10 | 3 | 6  | 3 | 370  | 42.3  | 5.12 | 266.2  | 221.6  | 206.3  | 239.9  | 239    | 252.9  | 195.6  | 228.6  |
| B4DRY1   | cDNA FLJ5    | MLLWILLI  | 5  | 3 | 11 | 3 | 696  | 77.7  | 6.61 | 347.9  | 348.9  | 265.1  | 318.1  | 347.4  | 332.6  | 311.7  | 306    |
| P50053   | Ketohexok    | MEEKQILC  | 16 | 5 | 10 | 5 | 298  | 32.5  | 6.32 | 505.3  | 381.4  | 294.5  | 366.7  | 496.3  | 422.9  | 352.5  | 379    |
| A0A024R7 | Solute carr  | MGDERPH   | 8  | 6 | 15 | 6 | 706  | 80.1  | 8.62 | 989.2  | 1000.2 | 753.4  | 1022.9 | 1044.3 | 840.7  | 773.4  | 864.2  |

|          |              |           |    |   |    |   |      |       |       |        |        |        |        |        |        |        |        |
|----------|--------------|-----------|----|---|----|---|------|-------|-------|--------|--------|--------|--------|--------|--------|--------|--------|
| A0A024R8 | Protein dis  | MLRRALLC  | 12 | 6 | 11 | 6 | 508  | 57.1  | 4.87  | 282.9  | 214.3  | 206.7  | 228.6  | 215.5  | 232.5  | 214    | 223.5  |
| K7N7A8   | Uncharact    | XETLTLHSL | 4  | 1 | 3  | 1 | 449  | 48.8  | 5.22  | 13.6   | 13.8   | 15.8   | 16.1   | 18.9   | 15.1   | 14.2   | 12.6   |
| A0A109PP | MS-C2 ligh   | DIRMTQSP  | 14 | 1 | 6  | 1 | 107  | 11.7  | 8.5   | 675    | 642.2  | 563    | 554.6  | 610.9  | 787.8  | 625.4  | 644.8  |
| A0A087WV | Trypsin-1 C  | MNPLLILTF | 16 | 3 | 34 | 1 | 247  | 26.6  | 5.86  | 934.1  | 517    | 804.9  | 753    | 588.5  | 698.1  | 612.1  | 683    |
| B7ZLM6   | X-prolyl an  | MARAHWC   | 8  | 5 | 11 | 5 | 674  | 75.6  | 6.04  | 475.6  | 392    | 298.2  | 425.1  | 434.6  | 393.2  | 281.5  | 399.9  |
| Q96DR8   | Mucin-like   | MKFLAVLV  | 18 | 2 | 78 | 2 | 90   | 9     | 4.64  | 7509.4 | 8039.1 | 6954.1 | 8901.6 | 8034.1 | 4241.8 | 5934.1 | 7477.2 |
| P36639   | 7,8-dihydr   | MYWSNQI   | 7  | 1 | 20 | 1 | 197  | 22.5  | 5.27  | 46.7   | 35.7   | 27.4   | 37.7   | 45     | 45.8   | 39.6   | 46.1   |
| A9UFC0   | Caspase 14   | MSNPRSLE  | 14 | 4 | 10 | 4 | 242  | 27.6  | 5.34  | 215.4  | 233.5  | 178.4  | 257.8  | 218.9  | 253.9  | 274    | 272.4  |
| Q15952   | Agrin (Frag  | ETCGDAVC  | 60 | 2 | 5  | 1 | 62   | 6.3   | 4.64  |        |        |        |        |        |        |        |        |
| V9HW48   | SH3 domai    | MVIRVYIAS | 35 | 3 | 13 | 3 | 114  | 12.8  | 5.25  | 89     | 114.7  | 92.2   | 70.4   | 60.5   | 68     | 75.6   | 56.2   |
| P02743   | Serum amy    | MNKPLLW   | 16 | 3 | 18 | 3 | 223  | 25.4  | 6.54  | 912.8  | 727.3  | 697.9  | 704.4  | 811.7  | 880.2  | 977.9  | 1124.2 |
| Q68D85   | Natural cyt  | MTWRAAA   | 9  | 3 | 6  | 3 | 454  | 50.8  | 5.59  | 193.7  | 177    | 164.2  | 180.1  | 188.2  | 189.8  | 183.7  | 202.5  |
| D3DRR6   | Inter-alpha  | MKRLTCFF  | 5  | 4 | 10 | 4 | 947  | 106.5 | 6.95  | 446.9  | 336    | 459.8  | 351.5  | 296.5  | 432.7  | 327.5  | 249.7  |
| Q59FG9   | Chondroiti   | IFPPNCNKF | 1  | 3 | 13 | 2 | 3410 | 374.1 | 4.53  | 499.4  | 334.5  | 388.2  | 461.9  | 497.8  | 485.2  | 436.1  | 517.4  |
| P48960   | CD97 antig   | MGGRVFLA  | 2  | 1 | 6  | 1 | 835  | 91.8  | 6.87  | 338.7  | 308.5  | 258.8  | 295.4  | 365.7  | 418.6  | 266.7  | 338    |
| O43291   | Kunitz-type  | MAQLCLF   | 10 | 2 | 15 | 2 | 252  | 28.2  | 8.29  | 788.1  | 788.7  | 558.5  | 759.9  | 858.5  | 751.6  | 781.3  | 935.7  |
| A8K2X4   | cDNA FLJ7    | MDRGTLP   | 6  | 3 | 19 | 3 | 658  | 70.5  | 6.61  | 254.2  | 221.6  | 278.7  | 245.1  | 246.7  | 241.7  | 214.8  | 236.8  |
| P21796   | Voltage-de   | MAVPPTYA  | 15 | 4 | 7  | 4 | 283  | 30.8  | 8.54  | 291.5  | 253.3  | 237.4  | 276.9  | 231.4  | 286.4  | 266.2  | 204.8  |
| A0A140T8 | Lysosomal    | MKSCGSM   | 10 | 2 | 10 | 2 | 308  | 34.9  | 6.33  | 282.1  | 214.6  | 187.1  | 265.8  | 266.3  | 310.6  | 229.1  | 225.9  |
| B2R778   | cDNA, FLJ9   | MILQAHLH  | 5  | 3 | 6  | 3 | 832  | 92.1  | 5.11  | 338.4  | 255.6  | 273.4  | 265.3  | 293.1  | 386.7  | 219.8  | 323.7  |
| B3KWI4   | cDNA FLJ4    | MPLKHILL  | 6  | 3 | 9  | 3 | 581  | 64.4  | 6.71  | 186.2  | 141.6  | 156.4  | 150.5  | 144.1  | 154.9  | 137.6  | 120.9  |
| A0A140VK | Aspartate    | MAPPSVFA  | 14 | 5 | 9  | 5 | 413  | 46.2  | 7.01  | 572.1  | 435.2  | 451.3  | 490.8  | 626.6  | 470.5  | 402    | 402.1  |
| O60635   | Tetraspani   | MQCFSFIK  | 5  | 1 | 5  | 1 | 241  | 26.3  | 5.25  | 181.3  | 116.9  | 104.5  | 126.7  | 132.7  | 135.5  | 103    | 121.1  |
| Q5T2L0   | V-set dom    | MVLLTSRM  | 6  | 2 | 18 | 2 | 285  | 31.2  | 5.99  | 1386   | 624.6  | 758.7  | 844    | 832    | 907.4  | 811.8  | 960.5  |
| P24158   | Myeloblast   | MAHRPPSF  | 17 | 3 | 17 | 3 | 256  | 27.8  | 8.35  | 615.9  | 413.6  | 295.9  | 368.9  | 390.2  | 623    | 677.4  | 289.9  |
| P68371   | Tubulin be   | MREIVHLQ  | 11 | 4 | 10 | 4 | 445  | 49.8  | 4.89  | 26.1   | 18.2   | 35.9   | 20.9   | 20.3   | 22.9   | 26.6   | 23.6   |
| A0A075B6 | Immunogl     | MSVPTMA   | 15 | 2 | 29 | 2 | 122  | 12.8  | 4.55  | 1770.1 | 2483   | 2168.7 | 2079.2 | 1873.2 | 3276.7 | 2795   | 2023.3 |
| P53801   | Pituitary tu | MAPGVAR   | 14 | 2 | 19 | 2 | 180  | 20.3  | 8.79  | 719.7  | 593.6  | 498.6  | 672.6  | 683.5  | 692.9  | 584.8  | 688.6  |
| B2R907   | cDNA, FLJ9   | MSDSKEPR  | 9  | 3 | 4  | 3 | 404  | 45.7  | 5.3   | 280.5  | 261.4  | 223.3  | 247.2  | 299.8  | 352.9  | 286.9  | 346.7  |
| A0A024R5 | EH domain    | MEQPGTA   | 5  | 3 | 9  | 2 | 548  | 61.9  | 6.71  | 230.6  | 191.1  | 140    | 221    | 275.8  | 256.4  | 187.4  | 231    |
| Q99536   | Synaptic ve  | MSDEREVA  | 12 | 3 | 5  | 3 | 393  | 41.9  | 6.29  | 147.4  | 135.9  | 133.5  | 135.5  | 144    | 146.5  | 129.6  | 130.3  |
| E7EUF1   | Ectonuclec   | MTRHADR   | 1  | 1 | 7  | 1 | 884  | 101.5 | 7.53  | 382.5  | 334.8  | 317.6  | 321.1  | 371.3  | 344.8  | 278.6  | 343.1  |
| P20933   | N(4)-(beta   | MARKSNLF  | 14 | 4 | 9  | 4 | 346  | 37.2  | 6.28  | 461.4  | 372.8  | 418.8  | 441.1  | 415.2  | 405.2  | 402.6  | 404.3  |
| A0A0S2Z3 | Dopa deca    | MNASEFRF  | 10 | 5 | 16 | 5 | 480  | 53.9  | 7.2   | 623.3  | 493    | 418.8  | 507    | 614.7  | 582.5  | 496.5  | 494.9  |
| Q6UX15   | Layilin OS   | MRPGTALC  | 8  | 4 | 7  | 4 | 382  | 43.1  | 4.94  | 465.8  | 467.6  | 353    | 491.7  | 476.1  | 528    | 409.6  | 442.6  |
| B4DKN3   | cDNA FLJ5    | MERAEEPV  | 9  | 3 | 8  | 3 | 499  | 51.1  | 6.14  | 248    | 225.7  | 183.8  | 210.3  | 240.4  | 248    | 204.9  | 210.3  |
| A0A0A0MT | UPF0764 p    | MASLGLLL  | 8  | 4 | 23 | 4 | 434  | 48.8  | 5.99  | 947.7  | 795.9  | 793.3  | 743.5  | 1208.5 | 899    | 733.4  | 879.9  |
| Q66K79   | Carboxype    | MPPPLPLL  | 3  | 2 | 29 | 2 | 652  | 73.6  | 7.97  | 2090.1 | 2060.2 | 1403.2 | 2560.9 | 2240.2 | 2475.9 | 2134.7 | 2103.6 |
| B4DR52   | Histone H2   | MPDPAKSA  | 20 | 3 | 22 | 3 | 166  | 18    | 10.32 | 1928   | 1482.9 | 826.5  | 1087.7 | 1195   | 1902.3 | 2601.2 | 992.5  |
| B3KQS9   | cDNA PSEC    | MIPLLLAAL | 10 | 3 | 21 | 3 | 360  | 39.5  | 8.05  | 918.8  | 688.6  | 633    | 750.2  | 900.2  | 788.1  | 835.3  | 773.7  |
| Q08257   | Quinone o    | MATGQKLI  | 12 | 3 | 12 | 3 | 329  | 35.2  | 8.44  | 477.5  | 325.6  | 294.8  | 327    | 454.5  | 355.2  | 293.3  | 319.8  |

|           |              |           |    |   |    |   |      |       |       |        |        |        |        |        |        |        |        |
|-----------|--------------|-----------|----|---|----|---|------|-------|-------|--------|--------|--------|--------|--------|--------|--------|--------|
| Q59G10    | Aldehyde c   | QSSRTGGD  | 7  | 5 | 7  | 5 | 954  | 104   | 6.42  | 215.2  | 158.9  | 151.1  | 161    | 201.3  | 219.5  | 148.9  | 170.9  |
| B4DLV7    | Rab GDP d    | MSLGKRP   | 10 | 4 | 15 | 3 | 449  | 51.1  | 8.18  | 621.6  | 512.2  | 420.2  | 524.1  | 562    | 568.7  | 475.1  | 472.6  |
| P30043    | Flavin redu  | MAVKKIAIF | 12 | 2 | 5  | 2 | 206  | 22.1  | 7.65  | 203.2  | 171.6  | 166.2  | 173    | 162.3  | 185.4  | 150.6  | 143.4  |
| Q400G7    | B and T lyn  | MKTLPAM   | 7  | 1 | 4  | 1 | 289  | 32.8  | 6.34  | 92.5   | 71     | 80.2   | 75.5   | 90.5   | 92.8   | 91.7   | 106.5  |
| Q9Y3B3    | Transmem     | MPRPGSAC  | 16 | 3 | 9  | 3 | 224  | 25.2  | 6.89  | 430    | 442    | 374.7  | 411    | 450.4  | 400    | 435.7  | 446    |
| P59665    | Neutrophil   | MRTLAILA  | 19 | 2 | 29 | 2 | 94   | 10.2  | 6.99  | 2669.7 | 2632.3 | 1359.4 | 2256.9 | 2139   | 4014.5 | 4344.9 | 1746.8 |
| A0A0R7FJH | Coagulatio   | MRALLLLG  | 6  | 2 | 6  | 2 | 615  | 67.8  | 7.8   | 132    | 114.1  | 91.6   | 96.1   | 89.6   | 107.7  | 95.5   | 83.3   |
| B2RBC8    | cDNA, FLJ9   | MEKRLGVK  | 2  | 2 | 13 | 2 | 1049 | 115.5 | 6.11  | 762.3  | 686.1  | 530.6  | 751.3  | 847.2  | 764.2  | 717    | 875.9  |
| P16035    | Metallopro   | MGAAART   | 13 | 3 | 9  | 3 | 220  | 24.4  | 7.49  | 808.9  | 682    | 925.9  | 901.6  | 865.5  | 873.9  | 706.7  | 890.7  |
| P61204    | ADP-ribosy   | MGNIFGNI  | 18 | 3 | 14 | 3 | 181  | 20.6  | 7.43  | 671.3  | 534.7  | 486.1  | 627.4  | 643.2  | 608.7  | 613.1  | 528.6  |
| A8K6C1    | cDNA FLJ7    | MLAATVLT  | 11 | 5 | 10 | 5 | 493  | 54.7  | 6.09  | 508.1  | 509    | 420.8  | 490    | 501.5  | 492.2  | 482.6  | 461.4  |
| V9HWH9    | Protein S1   | MAKISSPT  | 28 | 3 | 17 | 3 | 105  | 11.7  | 7.12  | 1275.4 | 1048.9 | 979.6  | 1149.1 | 1119   | 1259.7 | 1780.4 | 1224.2 |
| A0A1B0RPF | Fibroblast   | MWSWKCI   | 4  | 3 | 16 | 3 | 822  | 91.8  | 6.15  | 546.6  | 460.8  | 379.5  | 479.6  | 487.4  | 484.2  | 446.5  | 493.9  |
| O00182    | Galectin-9   | MAFSGSQ   | 6  | 2 | 11 | 2 | 355  | 39.5  | 9.17  | 1045.3 | 676.1  | 737.8  | 930.6  | 1037.1 | 1067.8 | 872.9  | 878.9  |
| B2R7S7    | cDNA, FLJ9   | MTSTFNPR  | 8  | 4 | 6  | 4 | 519  | 57    | 5.49  | 199.8  | 176    | 131.7  | 186.5  | 198.7  | 197.4  | 149.8  | 165.1  |
| Q9NZT1    | Calmodulin   | MAGELTPE  | 27 | 3 | 11 | 3 | 146  | 15.9  | 4.44  | 150.4  | 119.4  | 135.3  | 141.9  | 147.2  | 146.9  | 187.8  | 169.4  |
| A0A0G2JPI | Leukocyte    | MSPHLTAL  | 15 | 3 | 38 | 2 | 208  | 23    | 7.09  | 358.4  | 324.8  | 293.2  | 266.2  | 374.8  | 307.5  | 300.5  | 339.7  |
| P36871    | Phosphogl    | MVKIVTVK  | 9  | 5 | 7  | 5 | 562  | 61.4  | 6.76  | 459.6  | 364.2  | 431.6  | 387.2  | 432.3  | 432.8  | 369    | 380.9  |
| A2N7P4    | Immunogl     | AHSQVQLV  | 28 | 3 | 10 | 1 | 120  | 13.3  | 9.26  |        |        |        |        |        |        |        |        |
| Q96SB0    | Anti-strept  | QSVLTQPP  | 22 | 2 | 13 | 1 | 108  | 11.6  | 6.54  | 103.3  | 105.1  | 83.6   | 124.1  | 95.9   | 159.3  | 128.6  | 94.1   |
| A0A024R9H | EH-domain    | MFSWMGF   | 6  | 3 | 10 | 2 | 541  | 61.1  | 6.76  | 83.8   | 62.1   | 80.9   | 65.4   | 73.5   | 75.6   | 66.8   | 74.6   |
| X5DR95    | Semaphori    | MKGTCVIA  | 3  | 3 | 6  | 3 | 1074 | 120.5 | 7.21  | 163.8  | 133.1  | 125.9  | 174.9  | 182.3  | 167.5  | 128.8  | 177    |
| Q99816    | Tumor sus    | MAVSESQL  | 7  | 3 | 6  | 3 | 390  | 43.9  | 6.46  | 528.8  | 361.9  | 382.6  | 413.9  | 458.6  | 540.4  | 350.4  | 390.7  |
| P20333    | Tumor nec    | MAPVAVV   | 6  | 2 | 7  | 1 | 461  | 48.3  | 6.28  | 737.1  | 596.5  | 516.7  | 657.8  | 571.3  | 1127.5 | 680.3  | 706.7  |
| Q5U043    | S-(hydroxy   | MANEVIKC  | 9  | 3 | 8  | 3 | 374  | 39.7  | 7.49  | 298    | 217.4  | 185.4  | 220.4  | 254.7  | 214.3  | 197.9  | 183    |
| Q5JRA6    | Melanoma     | MAAAPGLI  | 2  | 3 | 12 | 3 | 1907 | 213.6 | 4.84  | 285    | 309.2  | 227.4  | 296.8  | 275.4  | 256.7  | 276.2  | 297.4  |
| I3L4C2    | Brain-spec   | MSLSRSEEI | 4  | 2 | 5  | 2 | 553  | 61.3  | 8.94  | 79.9   | 66.5   | 81.2   | 67.8   | 88.2   | 69.2   | 63.5   | 77.2   |
| Q9BRA2    | Thioredoxi   | MARYEEVS  | 27 | 3 | 15 | 3 | 123  | 13.9  | 5.52  | 875.4  | 691.2  | 566.4  | 824.8  | 928.7  | 889.1  | 769.6  | 785.9  |
| Q9UL89    | Myosin-re    | VQSGAEVK  | 16 | 2 | 9  | 2 | 116  | 12.6  | 9.1   | 104.1  | 79.9   | 126.5  | 115.9  | 75.1   | 109.9  | 102.6  | 84.9   |
| A0A0A6YY  | Trefoil fact | MKRVLSCV  | 12 | 1 | 45 | 1 | 94   | 10.2  | 6.92  | 5290.9 | 6041.5 | 3228.5 | 5198.1 | 5099.7 | 4859.1 | 5565.3 | 4753.6 |
| A8K556    | cDNA FLJ7    | MATTVPDC  | 6  | 2 | 4  | 2 | 357  | 40.3  | 8.15  | 58.7   | 55.2   | 41.1   | 54.3   | 68.5   | 61.2   | 78.9   | 66.2   |
| P41181    | Aquaporin    | MWELRSIA  | 8  | 2 | 14 | 2 | 271  | 28.8  | 6.93  | 769.4  | 814.4  | 541.7  | 802.1  | 943.5  | 759    | 695.1  | 738.1  |
| A0A024R7I | Interferon   | MTLSPLLLF | 8  | 2 | 10 | 2 | 250  | 27.9  | 4.88  | 402.6  | 352.3  | 289    | 434.6  | 329    | 447.9  | 352.1  | 330.6  |
| Q13508    | Ecto-ADP-r   | MKTGHFEI  | 5  | 2 | 58 | 2 | 389  | 43.9  | 6.06  | 3432.9 | 3392.8 | 2121.5 | 3256.2 | 3934.9 | 3277   | 2456.4 | 3963.6 |
| Q8N4F0    | BPI fold-co  | MAWASRL   | 7  | 3 | 15 | 3 | 458  | 49.1  | 8.72  | 698.4  | 482    | 566.6  | 533.5  | 911.4  | 549    | 538.1  | 975    |
| A1L4F5    | Receptor t   | MARGSALF  | 4  | 3 | 8  | 2 | 943  | 104.7 | 6.55  | 674    | 486.7  | 482.7  | 589.5  | 542.8  | 616.9  | 539.6  | 539.3  |
| Q7Z5F5    | Liver-expre  | MWHLKLC   | 25 | 2 | 27 | 2 | 81   | 9.3   | 10.01 | 2169.4 | 2019.6 | 1508.1 | 2123.8 | 2118.7 | 2721.5 | 2031.8 | 2352.3 |
| Q6MZK8    | Putative ur  | MSDLSVIG  | 1  | 2 | 10 | 1 | 2060 | 226.3 | 4.44  | 855.3  | 753.2  | 602.8  | 824.9  | 1052.1 | 815.5  | 884.4  | 1055.5 |
| A0A0G2JN  | Leukocyte    | MEQPHDE   | 8  | 4 | 11 | 4 | 478  | 52.5  | 6.57  | 727.8  | 569.3  | 471.4  | 639.9  | 650.6  | 758.7  | 604.4  | 506.9  |
| Q9UK41    | Vacuolar p   | MFHGIPAT  | 12 | 2 | 5  | 2 | 221  | 25.4  | 5.54  | 168.4  | 135.1  | 131.4  | 135.1  | 139.5  | 134.7  | 115.1  | 125.4  |
| B1AKK2    | Dimethylar   | MAGLGHP   | 11 | 3 | 20 | 2 | 285  | 31.1  | 5.81  | 361.4  | 224.5  | 236.1  | 227.3  | 316.5  | 262.5  | 254.1  | 237.8  |

|          |              |           |    |   |    |   |      |       |      |        |        |        |        |        |        |        |         |
|----------|--------------|-----------|----|---|----|---|------|-------|------|--------|--------|--------|--------|--------|--------|--------|---------|
| Q13201   | Multimeric   | MKGARLFV  | 2  | 2 | 33 | 2 | 1228 | 138   | 7.93 | 2564.2 | 2383.5 | 1835.3 | 2261.2 | 2741.7 | 3078.9 | 2514.8 | 3084.4  |
| Q6PCB0   | von Willeb   | MLPWTA    | 9  | 3 | 9  | 3 | 445  | 46.8  | 7.68 | 686.2  | 405.7  | 301.9  | 381.8  | 389    | 484.1  | 312.9  | 360.7   |
| Q15904   | V-type pro   | MMAAMA    | 5  | 2 | 17 | 2 | 470  | 52    | 6.14 | 417.9  | 529.1  | 297.8  | 374.5  | 464    | 308.2  | 356.3  | 385.4   |
| H0Y8X4   | 2'-deoxynu   | AAAMVPG   | 14 | 2 | 9  | 2 | 243  | 25.9  | 5.5  | 414.4  | 324    | 305.7  | 351.5  | 377.2  | 305    | 272.2  | 281.2   |
| P07585   | Decorin OS   | MKATIILL  | 9  | 3 | 7  | 2 | 359  | 39.7  | 8.54 | 405    | 330.1  | 330.8  | 366    | 354.2  | 363.2  | 359.3  | 336.7   |
| B3KPR2   | cDNA FLJ3    | MGLQTTK   | 5  | 3 | 9  | 3 | 660  | 73.9  | 7.66 | 481.3  | 551    | 426.2  | 475.2  | 421.6  | 462.8  | 373    | 426.5   |
| Q03405   | Urokinase    | MGHPPLF   | 9  | 2 | 9  | 2 | 335  | 37    | 6.65 | 127.2  | 158.8  | 115.4  | 127.4  | 117    | 122    | 109.9  | 107.7   |
| Q32Q12   | Nucleoside   | MVLLSTLG  | 22 | 4 | 5  | 4 | 292  | 32.6  | 8.48 | 543    | 451.4  | 400.9  | 497.6  | 535.8  | 501.1  | 491.2  | 380.3   |
| Q9ULC0   | Endomucir    | MELLQVTII | 5  | 1 | 5  | 1 | 261  | 27.4  | 7.94 | 808    | 759.5  | 456.2  | 869.5  | 842.1  | 601.8  | 867.5  | 772.7   |
| O00322   | Uroplakin-   | MASAAAA   | 15 | 3 | 9  | 3 | 258  | 28.9  | 5.33 | 488.1  | 477.2  | 370.2  | 501.9  | 484.3  | 500.6  | 421.2  | 506.4   |
| P24593   | Insulin-like | MVLLTAVL  | 14 | 3 | 8  | 3 | 272  | 30.6  | 8.21 | 542.3  | 491    | 409.2  | 491.8  | 463.7  | 516    | 480.8  | 422.2   |
| B1B0D4   | ADAMTS-li    | MLFEVGEG  | 4  | 4 | 8  | 4 | 1060 | 116.2 | 6.76 | 116.7  | 99.4   | 82.5   | 111.7  | 111.1  | 113    | 105.9  | 111.6   |
| Q13308   | Inactive ty  | MGAARGS   | 3  | 3 | 8  | 3 | 1070 | 118.3 | 7.09 | 280.4  | 218.1  | 203.3  | 250    | 240.6  | 192.5  | 222.6  | 238     |
| O43570   | Carbonic a   | MPRRSLHA  | 13 | 3 | 6  | 3 | 354  | 39.4  | 7.23 | 13.3   | 11.4   | 8.7    | 13.7   | 16.3   | 12.6   | 10.4   | 12.2    |
| A0A0X9UV | IBM-A3 he    | EVQLVQSG  | 20 | 2 | 5  | 2 | 127  | 14.4  | 8.37 | 93.6   | 64.4   | 53     | 61     | 55.5   | 64.3   | 52     | 45      |
| Q9NQ38   | Serine prot  | MKIATVSV  | 6  | 4 | 20 | 4 | 1064 | 120.6 | 8.06 | 1745.1 | 2618.2 | 1196.8 | 2027.1 | 2058.5 | 1807.5 | 1876.7 | 2121.7  |
| Q9NY25   | C-type lect  | MNWHMII   | 17 | 3 | 7  | 3 | 188  | 21.5  | 8.81 | 351.3  | 284.6  | 275    | 294.5  | 332.6  | 334.2  | 329    | 366.3   |
| Q15223   | Nectin-1 O   | MARMGLA   | 6  | 3 | 7  | 3 | 517  | 57.1  | 6.1  | 923.9  | 798    | 666.1  | 1008.6 | 951.5  | 945.8  | 900.1  | 980.7   |
| Q53RD9   | Fibulin-7 O  | MVPSSPRA  | 5  | 2 | 15 | 2 | 439  | 47.3  | 7.62 | 669.2  | 772.3  | 512.5  | 663.2  | 655.9  | 708.5  | 603.7  | 722     |
| Q16706   | Alpha-man    | MKLSRQFT  | 4  | 4 | 12 | 4 | 1144 | 131.1 | 7.58 | 313.3  | 279.2  | 211.3  | 288.8  | 318.6  | 301.1  | 276    | 283.9   |
| P48551   | Interferon   | MLLSQNAF  | 3  | 2 | 13 | 2 | 515  | 57.7  | 4.5  | 969.7  | 966.2  | 532.1  | 832.4  | 832.9  | 938.9  | 1155.2 | 1228.8  |
| A0A068LK | Ig heavy ch  | QLQLQESG  | 13 | 1 | 6  | 1 | 120  | 13.2  | 9.07 | 223.1  | 168    | 183.1  | 214.1  | 275.5  | 194.4  | 225.9  | 241.8   |
| Q14314   | Fibroleukir  | MKLANWY   | 8  | 4 | 7  | 4 | 439  | 50.2  | 7.39 | 907    | 602.9  | 714.1  | 759    | 756.1  | 883.9  | 611.3  | 676.9   |
| P36405   | ADP-ribosy   | MGLLSILRK | 13 | 2 | 9  | 2 | 182  | 20.4  | 7.24 | 89.8   | 76.7   | 74.6   | 82.7   | 84.3   | 76.4   | 73.4   | 74.8    |
| O15240   | Neurosecre   | MKALRLSA  | 6  | 3 | 11 | 3 | 615  | 67.2  | 4.78 | 1246.6 | 1077.7 | 1069.5 | 1201.3 | 1129.4 | 1204.7 | 944.5  | 1220.8  |
| J3KS40   | Secreted a   | MQTCPLAF  | 19 | 1 | 8  | 1 | 85   | 9     | 5.06 | 105.1  | 109.4  | 88.8   | 105.4  | 121.7  | 113.9  | 86.2   | 105.4   |
| A0A024R6 | Delta-like 1 | MTATEALL  | 11 | 3 | 41 | 3 | 383  | 41.2  | 5.53 | 5585.3 | 4701.3 | 3555.6 | 5313.7 | 5481.2 | 4643.6 | 4609.3 | 7066.9  |
| Q05DB4   | HEBP2 pro    | MAEPLQPD  | 12 | 2 | 5  | 2 | 214  | 24    | 5.38 | 166.8  | 129.9  | 121.3  | 133    | 147.9  | 146.2  | 137.4  | 131.4   |
| B2R9S4   | cDNA, FLJ9   | MYTAIPQS  | 9  | 3 | 4  | 3 | 348  | 38.5  | 6.37 | 429.5  | 374.1  | 304.8  | 409.4  | 418.8  | 414.3  | 386.5  | 345.9   |
| Q9UNF0   | Protein kin  | MSVTYDD   | 9  | 3 | 9  | 3 | 486  | 55.7  | 5.2  | 113.8  | 88.1   | 82     | 86.2   | 96.6   | 86.8   | 88.5   | 87.7    |
| Q92626   | Peroxidasir  | MAKRSRGF  | 2  | 3 | 8  | 3 | 1479 | 165.2 | 7.17 | 502.6  | 374.6  | 450.9  | 519.3  | 480.2  | 484.8  | 411.6  | 473.6   |
| A7U7M2   | Prion prote  | MRKHLSW   | 21 | 4 | 12 | 4 | 176  | 20.3  | 9.03 | 491.1  | 387.7  | 394.6  | 557.2  | 463.6  | 502.4  | 445.8  | 541.8   |
| A0A024R3 | Ras homol    | MAAIRKKL  | 20 | 3 | 9  | 3 | 193  | 21.8  | 6.1  | 241.7  | 211.6  | 151.2  | 216.2  | 200.1  | 211.9  | 171.5  | 180.3   |
| A0A140VJ | Testicular t | MGGKQRD   | 3  | 2 | 31 | 2 | 710  | 79.2  | 8.59 | 1606.4 | 1615.9 | 1322.8 | 1825.1 | 2007.2 | 1269.3 | 1273.9 | 1629    |
| B4DNE1   | cDNA FLJ5    | MAAALFVL  | 10 | 4 | 14 | 4 | 385  | 42.2  | 5.66 | 1232.1 | 1051.4 | 965.8  | 1151.8 | 1223.4 | 1385.8 | 1101.1 | 1315.6  |
| P40199   | Carcinoem    | MGPPSAPP  | 10 | 2 | 12 | 2 | 344  | 37.2  | 5.82 | 349.8  | 353    | 250.2  | 367    | 327.1  | 365.5  | 316.6  | 325     |
| Q00796   | Sorbitol de  | MAAAAKPI  | 15 | 5 | 11 | 5 | 357  | 38.3  | 7.97 | 686.6  | 565.3  | 402    | 526.4  | 544.3  | 482.9  | 356.4  | 446.2   |
| Q16610   | Extracellul  | MGTTARA   | 10 | 4 | 5  | 4 | 540  | 60.6  | 6.71 | 138.6  | 99.2   | 111.4  | 123.6  | 109.2  | 115.1  | 108.8  | 111.2   |
| A0A193CH | 10E8 heav    | EVRLVESG  | 18 | 2 | 15 | 1 | 131  | 14.6  | 4.84 | 323    | 277.2  | 277.4  | 324.6  | 344.5  | 356.2  | 334.3  | 299.2   |
| B2R597   | cDNA, FLJ9   | MNVLLGSV  | 14 | 2 | 78 | 2 | 114  | 12.8  | 5.5  | 9325.5 | 9386.4 | 7418.6 | 9548.3 | 9352.6 | 2737.9 | 4333.9 | 12181.9 |
| P20151   | Kallikrein-2 | MWDLVLS   | 8  | 2 | 45 | 1 | 261  | 28.7  | 6.92 |        |        |        |        |        |        |        |         |

|           |              |           |    |   |    |   |      |       |      |        |        |        |        |        |        |        |        |
|-----------|--------------|-----------|----|---|----|---|------|-------|------|--------|--------|--------|--------|--------|--------|--------|--------|
| Q9Y376    | Calcium-bi   | MPFPFGKS  | 12 | 4 | 7  | 4 | 341  | 39.8  | 6.89 | 241    | 199.4  | 144.7  | 218.1  | 224.5  | 205.7  | 147.1  | 197    |
| A0A140VJK | Testicular t | MAQKEGG   | 5  | 2 | 8  | 2 | 417  | 45    | 7.62 | 169.6  | 136.7  | 123.7  | 148.1  | 149.7  | 139.7  | 130.9  | 138.2  |
| Q0ZCH6    | Immunglot    | LVQLVESG  | 15 | 2 | 7  | 2 | 131  | 14.3  | 6.55 | 587.5  | 508.3  | 538.1  | 771.4  | 534.1  | 589.1  | 544.5  | 522    |
| Q9BXN2    | C-type lect  | MEYHPDLE  | 9  | 2 | 13 | 2 | 247  | 27.6  | 5.36 | 416.2  | 382.7  | 326.9  | 393.8  | 385    | 526.4  | 402.3  | 420.9  |
| Q8TCD5    | 5'(3')-deox  | MARSVRVL  | 17 | 3 | 9  | 3 | 201  | 23.4  | 6.64 | 586.3  | 496.2  | 436    | 541.1  | 570.5  | 585.2  | 467.6  | 528.8  |
| B4DMS4    | cDNA FLJ5    | MGKLSRCS  | 2  | 2 | 4  | 2 | 812  | 88.4  | 4.4  | 558.8  | 527    | 395.8  | 590.7  | 608.2  | 594.4  | 495.7  | 369.1  |
| Q9NP79    | Vacuolar p   | MAALAPLP  | 18 | 3 | 6  | 3 | 307  | 33.9  | 6.29 | 46.8   | 30.5   | 34.5   | 36.9   | 42.8   | 39.2   | 46.4   | 37.1   |
| Q9UGM3    | Deleted in   | MGISTVILE | 7  | 2 | 4  | 2 | 2413 | 260.6 | 5.44 | 195.1  | 201.8  | 178.1  | 171.8  | 160.3  | 202.5  | 200.3  | 214.2  |
| A8K0T9    | cDNA FLJ7    | MADFDDR   | 17 | 3 | 6  | 2 | 286  | 32.9  | 5.69 | 370.4  | 374.5  | 216.2  | 349    | 362.7  | 369.4  | 279.8  | 238.9  |
| P23468    | Receptor-t   | MVHVARLI  | 2  | 3 | 3  | 2 | 1912 | 214.6 | 6.57 | 54.4   | 39.6   | 39.9   | 32.9   | 42.9   | 82.3   | 31     | 48.4   |
| P24592    | Insulin-like | MTPHRLLP  | 10 | 2 | 7  | 2 | 240  | 25.3  | 7.81 | 865.4  | 908.8  | 760.7  | 865    | 812.3  | 844.8  | 829.2  | 785    |
| P20827    | Ephrin-A1    | MEFLWAPI  | 13 | 3 | 16 | 3 | 205  | 23.8  | 6.83 | 1424.5 | 1376.3 | 976.8  | 1436   | 1513.2 | 1470.8 | 1186.4 | 1456.4 |
| Q9UIU0    | Dihydropy    | MAAGCLLA  | 5  | 5 | 8  | 5 | 1110 | 125.2 | 5.36 | 442.2  | 448.9  | 434.8  | 458.6  | 534.3  | 450.8  | 378.3  | 439    |
| P01210    | Proenkeph    | MARFLTLC  | 9  | 2 | 10 | 2 | 267  | 30.8  | 5.53 | 888.3  | 775    | 1029.9 | 853.9  | 785.3  | 764.7  | 703.1  | 752.9  |
| P06703    | Protein S1   | MACPLDQ   | 24 | 3 | 32 | 3 | 90   | 10.2  | 5.48 | 2621.2 | 2536.2 | 1732.2 | 2589.1 | 3375.7 | 3079.8 | 3340.9 | 2629.1 |
| A0A024RB  | Tetraspani   | MAVEGGM   | 4  | 1 | 24 | 1 | 238  | 25.6  | 7.81 | 1531.3 | 1467.4 | 1195.2 | 1469.9 | 1382.3 | 1209.3 | 1181.8 | 1265.1 |
| Q9H0B8    | Cysteine-ri  | MSCVLGGV  | 9  | 4 | 8  | 3 | 497  | 55.9  | 8.02 | 627.2  | 623.6  | 559.7  | 583.5  | 584.2  | 467.9  | 479.4  | 601.1  |
| P08729    | Keratin, ty  | MSIHFSSPV | 9  | 5 | 14 | 2 | 469  | 51.4  | 5.48 | 137.6  | 73.7   | 60.5   | 69.4   | 74.3   | 109.6  | 151.1  | 78.3   |
| P25815    | Protein S1   | MTELETAM  | 24 | 2 | 14 | 2 | 95   | 10.4  | 4.88 | 1048.1 | 841.3  | 548.2  | 869.6  | 1204.9 | 1073.2 | 1676.1 | 900.9  |
| P14625    | Endoplasm    | MRALWVL   | 5  | 3 | 6  | 2 | 803  | 92.4  | 4.84 |        |        |        |        |        |        |        |        |
| A0A024R1  | Glycerol-3-  | MASKKVICI | 9  | 3 | 10 | 3 | 349  | 37.5  | 6.18 | 871.9  | 478.6  | 510.2  | 500.7  | 553.8  | 512.5  | 409.5  | 437.7  |
| B1PS43    | Myosin he    | MAQKGQL   | 1  | 2 | 7  | 2 | 2029 | 234.1 | 5.8  | 277.4  | 174.6  | 171.4  | 191.6  | 185.1  | 211.5  | 207.8  | 156.6  |
| A0A087WY  | Seizure 6-li | MGTPraQ   | 4  | 3 | 7  | 3 | 923  | 99.1  | 4.87 | 178    | 98.7   | 99.9   | 105.3  | 110.5  | 109.3  | 104.6  | 107.6  |
| P01709    | Immunogl     | MAWALLLI  | 7  | 1 | 27 | 1 | 118  | 12.4  | 5.91 | 1762.5 | 2050.9 | 1622.8 | 1830.7 | 1804.7 | 1761.2 | 1809   | 1720.5 |
| B2R983    | cDNA, FLJ9   | MSGESARS  | 15 | 3 | 9  | 3 | 241  | 27.5  | 6.6  | 497.6  | 350.4  | 404.1  | 417.9  | 450    | 461.9  | 372.9  | 356.1  |
| A0A1C3PH  | MHC class    | MRVMAPR   | 10 | 3 | 4  | 2 | 366  | 40.6  | 6.2  |        |        |        |        |        |        |        |        |
| A0A024RD  | Scavenger    | MGRCCFYT  | 4  | 2 | 4  | 2 | 478  | 54.3  | 5.14 | 268.1  | 209.6  | 200.4  | 251.5  | 248.5  | 257    | 241.1  | 254.2  |
| P13640    | Metallothi   | MDPNCSCA  | 32 | 2 | 4  | 1 | 62   | 6.1   | 7.96 | 642.5  | 672.2  | 426.7  | 749.1  | 744.3  | 866.3  | 768.9  | 559.1  |
| B4DJQ5    | cDNA FLJ5    | MLLPLLLLL | 7  | 3 | 10 | 3 | 535  | 60.1  | 4.42 | 503.5  | 471.9  | 357    | 544.3  | 507.3  | 479.7  | 412    | 436.2  |
| Q16661    | Guanylate    | MGCRAASC  | 12 | 1 | 9  | 1 | 112  | 12.1  | 6.48 | 77.1   | 255.4  | 55.6   | 74.8   | 74.3   | 83     | 64.4   | 58.1   |
| Q96C23    | Aldose 1-e   | MASVTRAV  | 11 | 3 | 9  | 3 | 342  | 37.7  | 6.65 | 40.1   | 37.1   | 34.5   | 45.4   | 42.7   | 51.1   | 39.9   | 33.6   |
| J3KNB4    | Cathelicidi  | MGTMKTC   | 18 | 3 | 7  | 3 | 173  | 19.6  | 9.41 | 824.5  | 776.3  | 687.1  | 854.3  | 778.5  | 945.5  | 955.3  | 767.1  |
| Q86UD1    | Out at first | MRLPGVPL  | 11 | 3 | 14 | 3 | 273  | 30.7  | 6.84 | 741.8  | 579.9  | 648.7  | 639.2  | 774.1  | 816.5  | 652.4  | 662.9  |
| J3KPA1    | Cysteine-ri  | MKQILHPA  | 13 | 2 | 12 | 2 | 276  | 31    | 7.61 | 846.6  | 678.2  | 686.2  | 815.2  | 1100.2 | 768.3  | 908.6  | 1153.4 |
| A0A1C9J6  | B cell rece  | DIRMTQAF  | 11 | 1 | 8  | 1 | 107  | 11.7  | 7.99 | 562    | 568.8  | 540.6  | 476.3  | 525    | 524.9  | 483.8  | 475.4  |
| G3XAI2    | Laminin su   | MDCPLSAP  | 3  | 3 | 6  | 3 | 1810 | 200.3 | 4.96 | 451.9  | 413.4  | 392.9  | 399.7  | 394.8  | 492.2  | 361    | 400.8  |
| Q9H6B4    | CXADR-like   | MSLLLLLLL | 7  | 3 | 14 | 3 | 373  | 41.3  | 7.99 | 885.2  | 1107.5 | 697.3  | 940.9  | 968.6  | 931.8  | 1076.6 | 1006.1 |
| M0R1T5    | Charged m    | XEKKIADIK | 11 | 3 | 9  | 3 | 227  | 24.9  | 5.27 | 980.7  | 828.5  | 748.1  | 1024   | 1025.2 | 991.9  | 771.8  | 898.2  |
| B2RD36    | cDNA, FLJ9   | MANEAYPC  | 15 | 4 | 17 | 4 | 245  | 28    | 6.79 | 1492.3 | 900.7  | 954.5  | 1036.2 | 1323.4 | 1136.8 | 869.9  | 855.7  |
| A8K2T6    | cDNA FLJ7    | MERRWPL   | 3  | 3 | 8  | 3 | 976  | 108   | 6.64 | 703.3  | 624    | 587.6  | 715.9  | 667.7  | 722.9  | 635.5  | 665.8  |
| V9HW90    | Epididymis   | MALLPRAL  | 5  | 2 | 11 | 2 | 522  | 56.2  | 8.5  | 295.1  | 211.7  | 192.2  | 232.4  | 238.6  | 224.1  | 218.7  | 185.3  |

|          |                    |          |    |   |    |   |      |       |       |        |        |        |        |        |        |        |        |
|----------|--------------------|----------|----|---|----|---|------|-------|-------|--------|--------|--------|--------|--------|--------|--------|--------|
| A2N4P8   | IL2R protei        | ELCDDDP  | 11 | 2 | 7  | 2 | 251  | 28.4  | 6.52  | 253.3  | 187.2  | 203.7  | 229    | 207.5  | 218.4  | 244    | 217.5  |
| A2NW97   | Rheumatoid         | MDWTWR   | 13 | 2 | 8  | 1 | 134  | 14.9  | 8.85  | 438.5  | 385.4  | 497.1  | 397.1  | 387.4  | 383.6  | 441.3  | 395.2  |
| H7C2F2   | CD99 antigen       | RRWGRPA  | 8  | 1 | 10 | 1 | 201  | 20.6  | 5.27  | 154.8  | 175.9  | 131.9  | 149.6  | 136.9  | 168.1  | 129.4  | 165.1  |
| V9GYM3   | Apolipoprotein     | MCEQHPK  | 14 | 2 | 10 | 2 | 133  | 14.9  | 8.27  | 521.7  | 362.2  | 408.4  | 414.5  | 356.9  | 635.1  | 438.5  | 315.6  |
| B2R7Z2   | cDNA, FLJ9         | MPRQLSAA | 5  | 2 | 3  | 2 | 416  | 44.3  | 8.41  | 183.6  | 453.3  | 131    | 307.3  | 240.1  | 294.5  | 324.2  | 286.3  |
| P12724   | Eosinophil         | MVPKLFTS | 17 | 2 | 5  | 2 | 160  | 18.4  | 10.02 | 120.6  | 114.8  | 119.5  | 103    | 122.3  | 103.4  | 136.5  | 77.9   |
| A0A0A0M0 | Laminin subunit    | MALSSAW  | 2  | 3 | 7  | 3 | 1823 | 202.4 | 6.25  | 576.6  | 592.8  | 437.2  | 740.9  | 557    | 567.9  | 490.8  | 554.8  |
| O00526   | Uroplakin-III      | MAPLLPIR | 16 | 2 | 4  | 2 | 184  | 19.4  | 10.4  | 148    | 145    | 112    | 145.4  | 154.1  | 151.4  | 111.1  | 169.9  |
| A0A0C4DH | Immunoglobulin     | MRLLAQLL | 26 | 2 | 11 | 2 | 120  | 13.1  | 8.53  | 330.6  | 334    | 352.9  | 300.3  | 293.5  | 359.9  | 314.8  | 320.2  |
| A0N7J6   | REV25-2 (F)        | METPAQLL | 22 | 2 | 52 | 2 | 134  | 14.5  | 6.57  | 2349.9 | 3333.3 | 1832.2 | 2334.3 | 2874   | 2715.3 | 3016.2 | 2623.9 |
| Q8N3J6   | Cell adhesion      | MIWKRSAN | 8  | 2 | 5  | 2 | 435  | 47.5  | 5.33  | 220.8  | 222.4  | 135.6  | 198.5  | 202.8  | 203.5  | 193.6  | 226.2  |
| P27482   | Calmodulin         | MADQLTEF | 17 | 2 | 8  | 1 | 149  | 16.9  | 4.42  | 84.2   | 86.7   | 68.6   | 92.8   | 81.6   | 95.7   | 76.1   | 76.5   |
| P04732   | Metallothionein    | MDPNCSCA | 33 | 2 | 3  | 1 | 61   | 6     | 7.96  | 254    | 251.7  | 158    | 264    | 223.3  | 246.3  | 267.3  | 191.4  |
| Q53FE8   | cDNA FLJ3          | MAAERQE  | 3  | 1 | 24 | 1 | 370  | 40.5  | 5.14  | 1238.4 | 960.9  | 1061.7 | 1097.3 | 1221.9 | 1089.9 | 1157.5 | 1131.9 |
| B2RA03   | cDNA, FLJ9         | MSFTTRST | 7  | 3 | 20 | 1 | 430  | 48    | 5.38  | 55.1   | 40.8   | 37.9   | 44.4   | 46.9   | 49.8   | 84.5   | 40.2   |
| O94772   | Lymphocyte         | MLPAAMK  | 20 | 3 | 7  | 3 | 140  | 14.7  | 7.25  | 610.4  | 724.7  | 443.8  | 673.8  | 688.9  | 882.3  | 634.8  | 647.1  |
| C3VMY8   | Alpha B crystal    | MDIAIHHP | 17 | 3 | 4  | 3 | 175  | 20.1  | 7.08  | 670.4  | 480.8  | 514.7  | 530.1  | 657.6  | 546.5  | 531.7  | 449.9  |
| A0A024RD | 3-hydroxykynure    | MGRLDGK  | 9  | 2 | 5  | 2 | 245  | 26.7  | 7.65  | 124.4  | 92.5   | 119.7  | 93.9   | 95.3   | 90.5   | 79.4   | 86.1   |
| A0A075B6 | Immunoglobulin     | MAWTPLF  | 15 | 2 | 18 | 2 | 117  | 12.5  | 7.2   | 1561.4 | 2106.3 | 1329.5 | 1787   | 1749.1 | 2090.8 | 2051.3 | 1686   |
| Q969H8   | Myeloid-derived    | MAAPSGG  | 18 | 3 | 15 | 3 | 173  | 18.8  | 6.68  | 598.6  | 813.4  | 547    | 611.4  | 608.5  | 600.9  | 695.2  | 628.9  |
| A0A024RD | Tumor necrosis     | MALKVLE  | 7  | 2 | 2  | 2 | 423  | 46    | 5.47  | 241.4  | 262.3  | 209.8  | 237.7  | 239.2  | 242.4  | 204.1  | 233.8  |
| P81605   | Dermcidin          | MRFMTLLF | 10 | 1 | 10 | 1 | 110  | 11.3  | 6.54  | 618    | 1243.9 | 520.9  | 708.1  | 690.7  | 658.5  | 818.3  | 563.4  |
| Q02413   | Desmoglein-1       | MDWSFFR  | 5  | 3 | 5  | 3 | 1049 | 113.7 | 5.03  | 138.6  | 120.1  | 132.3  | 120.5  | 118.2  | 122.6  | 112    | 117.5  |
| Q9Y6Q6   | Tumor necrosis     | MAPRARRI | 3  | 1 | 6  | 1 | 616  | 66    | 5.34  | 169.1  | 162.6  | 104.8  | 158.9  | 145.6  | 149.7  | 134.6  | 139.8  |
| P15291   | Beta-1,4-galact    | MRLREPLL | 5  | 2 | 18 | 2 | 398  | 43.9  | 8.65  | 783    | 466.4  | 567    | 648.5  | 951    | 997.2  | 484.1  | 589.3  |
| A8K2U0   | Alpha-2-macrog     | MWAQLLL  | 3  | 4 | 5  | 4 | 1454 | 161   | 5.73  | 366.3  | 309.3  | 284.2  | 315.2  | 295.3  | 282.6  | 361.2  | 313.5  |
| Q9HC38   | Glyoxalase I       | MAARRALH | 6  | 2 | 9  | 2 | 313  | 34.8  | 5.6   | 498.6  | 388.2  | 319    | 357.1  | 408    | 360.4  | 321.7  | 331.6  |
| B1AH90   | Signal peptide     | MGAAAVR  | 9  | 2 | 5  | 2 | 347  | 37.3  | 5.71  | 100.6  | 170.1  | 79.4   | 116.6  | 101.8  | 107    | 116    | 118.8  |
| COJYY2   | Apolipoprotein     | MDPPRPAI | 1  | 3 | 5  | 3 | 4563 | 515.2 | 7.05  | 99.2   | 64     | 64.4   | 61.9   | 50.3   | 95.9   | 49.6   | 40.5   |
| Q53SS8   | Epididymis         | MDAGVTE  | 8  | 2 | 4  | 2 | 356  | 37.5  | 7.09  | 62.8   | 59.6   | 37.2   | 56.6   | 63.6   | 56.5   | 58.3   | 44.4   |
| P07307   | Asialoglycoprotein | MAKDFQD  | 12 | 2 | 6  | 2 | 311  | 35.1  | 6.25  | 42.3   | 43     | 57.1   | 41.9   | 47.7   | 40     | 35.8   | 40.5   |
| Q8NES3   | Beta-1,3-N-acetyl  | MLKRCGRF | 7  | 1 | 2  | 1 | 379  | 41.7  | 9.17  | 40.4   | 40.6   | 31.8   | 38.6   | 42     | 35.1   | 42.7   | 47.5   |
| P19021   | Peptidyl-glycyl    | MAGRVPST | 3  | 3 | 6  | 3 | 973  | 108.3 | 6.42  | 98.6   | 88.9   | 75.9   | 92.7   | 100.1  | 129.3  | 83.3   | 96.2   |
| Q9UEF7   | Klotho OS=         | MPASAPPF | 6  | 4 | 4  | 4 | 1012 | 116.1 | 7.97  | 279.8  | 257.9  | 230.4  | 264.9  | 250    | 258.7  | 200.7  | 214.6  |
| A8K865   | cDNA FLJ7          | MAPNIYLV | 4  | 1 | 8  | 1 | 259  | 28.5  | 7.99  | 345.7  | 270.3  | 197.2  | 341.9  | 299.2  | 283.5  | 354    | 271.8  |
| O75340   | Programmed cell    | MAAYSYRF | 6  | 1 | 5  | 1 | 191  | 21.9  | 5.4   | 189    | 153.1  | 173.9  | 182.4  | 212.6  | 186.2  | 181.1  | 205    |
| P21266   | Glutathione S-     | MSCSSMV  | 13 | 3 | 11 | 3 | 225  | 26.5  | 5.54  | 66     | 50.1   | 39.2   | 48.3   | 72.2   | 63.9   | 48.8   | 61.6   |
| A0A0B4J2 | Immunoglobulin     | MDMRVPA  | 14 | 1 | 7  | 1 | 117  | 12.6  | 7.84  | 89.8   | 85.7   | 85.5   | 77.9   | 82.1   | 94.4   | 67.6   | 101.1  |
| Q6IB39   | RNASE6 protein     | MVLCFPLL | 19 | 2 | 12 | 2 | 150  | 17.2  | 8.76  | 351.3  | 500.5  | 279.2  | 465.7  | 368.4  | 370.8  | 347.1  | 310.4  |
| B2RCJ5   | cDNA, FLJ9         | MSSSSWLL | 3  | 2 | 3  | 2 | 805  | 92.4  | 5.54  | 125    | 90.1   | 115.3  | 103.1  | 104.1  | 107.2  | 95     | 89     |
| Q59F30   | Fibroblast growth  | PCMWHQC  | 1  | 2 | 4  | 2 | 1034 | 112.1 | 7.88  | 36.9   | 33.4   | 27.5   | 27.7   | 31.3   | 38.8   | 37.8   | 33.7   |



|           |              |             |    |   |    |   |       |        |      |        |       |        |        |        |        |        |        |
|-----------|--------------|-------------|----|---|----|---|-------|--------|------|--------|-------|--------|--------|--------|--------|--------|--------|
| C7FDU7    | MHC class    | SHSMRYFS    | 12 | 2 | 4  | 1 | 181   | 21.2   | 7.3  |        |       |        |        |        |        |        |        |
| A0A024RB  | Vacuolar p   | MAGAGSE     | 6  | 1 | 2  | 1 | 285   | 31.3   | 7.34 |        |       |        |        |        |        |        |        |
| H7C2N1    | Prothymos    | XSPGLRPP    | 7  | 1 | 8  | 1 | 148   | 15.8   | 4.23 | 569.2  | 522.1 | 314.9  | 576.9  | 527.6  | 654.5  | 549.3  | 488.7  |
| Q495M3    | Proton-cou   | MSVTKSTE    | 5  | 2 | 9  | 2 | 483   | 53.2   | 8.12 | 221.4  | 214.9 | 152.7  | 203.2  | 194.1  | 232.3  | 167.2  | 204.8  |
| Q04721    | Neurogeni    | MPALRPAL    | 1  | 2 | 4  | 2 | 2471  | 265.2  | 5.14 | 481.2  | 394.6 | 439    | 462.4  | 423.5  | 417.2  | 442.6  | 466.6  |
| A0A087W1  | Neuroblast   | MCSLALQC    | 12 | 3 | 17 | 3 | 215   | 23.2   | 5.21 | 1931.4 | 2167  | 1555.1 | 2070.6 | 2151.1 | 1769.4 | 1990.9 | 2274.8 |
| Q9NZU0    | Leucine-ric  | MISAAWSI    | 6  | 3 | 4  | 3 | 649   | 73     | 7.64 | 20     | 17.8  | 13.4   | 18.3   | 26     | 19.6   | 18.1   | 23.7   |
| A0A0A0M1  | Titin OS=H   | (content is | 0  | 4 | 5  | 4 | 35991 | 3992.2 | 6.39 | 181    | 143.9 | 131.7  | 172.5  | 184.8  | 256    | 195.2  | 154.4  |
| E7ERL8    | Neurexin-1   | MGTALLQF    | 1  | 2 | 11 | 2 | 1507  | 165.3  | 5.96 | 1014.5 | 785.4 | 812.8  | 993.7  | 949.7  | 900.2  | 846.1  | 982.7  |
| O96033    | Molybdopt    | MVPLCQVI    | 22 | 2 | 7  | 2 | 88    | 9.7    | 4.72 | 326.8  | 303.4 | 280.7  | 312.9  | 361.7  | 331.1  | 305.8  | 328.1  |
| Q9NP85    | Podocin O    | MERRARSS    | 8  | 3 | 5  | 3 | 383   | 42.2   | 8.75 | 101.3  | 102.8 | 92.9   | 95.8   | 99.4   | 113.6  | 80.7   | 105.2  |
| P04430    | Immunogl     | MDMRVLA     | 14 | 1 | 5  | 1 | 117   | 12.6   | 8.16 |        |       |        |        |        |        |        |        |
| A0A140VK  | Testis secr  | MDPRKVN     | 8  | 3 | 7  | 3 | 369   | 41.3   | 5.27 | 306    | 265.6 | 193.6  | 267    | 278.8  | 245.7  | 218.2  | 201.6  |
| Q59EA3    | Cadherin 5   | TDRQNGT     | 4  | 3 | 3  | 3 | 807   | 89.9   | 5.48 | 27     | 43.2  | 24.1   | 36.3   | 37.2   | 26.3   | 45.4   | 31.7   |
| B3KQT8    | cDNA PSEC    | MRGANAV     | 8  | 3 | 13 | 3 | 415   | 45.7   | 8.47 | 384.5  | 386.2 | 320.4  | 383.5  | 415.3  | 464.9  | 350.9  | 391.1  |
| J3QQX2    | Rho GDP-d    | MAEQEPTA    | 13 | 2 | 14 | 2 | 235   | 25.8   | 7.44 | 418.3  | 384.4 | 291.8  | 383.7  | 406.8  | 341.3  | 324.2  | 379.3  |
| Q13145    | BMP and a    | MDRHSSYI    | 15 | 2 | 11 | 2 | 260   | 29.1   | 7.75 | 721.2  | 716.1 | 499.1  | 686.7  | 651.3  | 736.3  | 548.2  | 609.5  |
| P52209    | 6-phospho    | MAQADIAL    | 7  | 3 | 7  | 3 | 483   | 53.1   | 7.23 | 65.6   | 44.4  | 28.9   | 75.7   | 59.6   | 63.6   | 66.1   | 38.5   |
| E1U340    | ZNF511/PF    | MQVADVP     | 8  | 2 | 3  | 2 | 310   | 35.2   | 5.94 | 165.1  | 180.6 | 109.3  | 108.7  | 149.5  | 140.2  | 120.8  | 132.7  |
| A1L3A3    | Contactin 2  | MGTATRRF    | 4  | 2 | 3  | 2 | 1040  | 113.4  | 7.83 | 100.3  | 77.4  | 95     | 74.3   | 85     | 89.4   | 76.8   | 90.3   |
| Q6FHG5    | Gamma-sy     | MDVFKKGI    | 13 | 1 | 7  | 1 | 127   | 13.3   | 4.86 | 125.4  | 98.2  | 99.8   | 88.4   | 109.2  | 168.6  | 120    | 107.4  |
| A8K4A5    | cDNA FLJ7    | MPSLLVLT    | 5  | 3 | 9  | 3 | 541   | 59.8   | 6.27 | 453.2  | 345.1 | 446.9  | 402.3  | 466.4  | 436.6  | 293.7  | 364.1  |
| Q59FB9    | Toll interac | QLSPSQAP    | 4  | 1 | 3  | 1 | 352   | 38.9   | 8.46 | 40.8   | 33.5  | 34.7   | 27.8   | 34.3   | 43.9   | 27     | 32.7   |
| Q9H6S3    | Epidermal    | MSQSGAVS    | 3  | 3 | 4  | 3 | 715   | 80.6   | 6.84 | 262.5  | 249.9 | 190.6  | 271.4  | 313.3  | 238.5  | 248.1  | 260.1  |
| A0A0B4J1F | 4-hydroxy    | MTTYSDKG    | 12 | 4 | 4  | 4 | 393   | 44.9   | 7.01 | 135.8  | 93.1  | 99.6   | 99.8   | 124.5  | 113.8  | 77.7   | 90     |
| A0A024R3  | RAB4A, me    | MSQTAMS     | 10 | 2 | 10 | 1 | 218   | 24.4   | 6.07 | 28.9   | 39.9  | 24.3   | 33.8   | 36.2   | 32.5   | 26.2   | 32.2   |
| P03973    | Antileukop   | MKSSGLFP    | 9  | 1 | 5  | 1 | 132   | 14.3   | 8.75 | 423.3  | 599.4 | 265.8  | 552.7  | 486.9  | 358.9  | 398.8  | 431.3  |
| P51170    | Amiloride-   | MAPGEKIK    | 4  | 2 | 8  | 2 | 649   | 74.2   | 7.5  | 377.2  | 270.6 | 256.5  | 322.6  | 414.9  | 372    | 303    | 446.9  |
| Q9H461    | Frizzled-8   | (MEWGYLL    | 3  | 2 | 9  | 2 | 694   | 73.3   | 8.19 | 660.3  | 701   | 481.4  | 692.9  | 680.7  | 536.9  | 744.7  | 671.3  |
| Q9UIH2    | Tumor nec    | VAFTPYAP    | 85 | 2 | 4  | 1 | 33    | 3.7    | 6.27 |        |       |        |        |        |        |        |        |
| Q8IX04    | Ubiquitin-c  | MEFDCEGL    | 6  | 3 | 5  | 3 | 471   | 52.2   | 7.09 | 196.9  | 171.8 | 165.5  | 201.4  | 198.6  | 192.3  | 143.1  | 171    |
| E0D851    | Platelet gly | MPLLLLLLL   | 3  | 2 | 9  | 2 | 665   | 72.8   | 6.09 | 303.1  | 480.4 | 241.3  | 306.7  | 289.2  | 319.5  | 387.8  | 339.9  |
| Q08629    | Testican-1   | MPAIAVLA    | 9  | 3 | 10 | 3 | 439   | 49.1   | 6.1  | 178.7  | 123.5 | 137.4  | 123.8  | 178    | 244.7  | 161.4  | 171.3  |
| Q6FHJ7    | Secreted fr  | MFLSILVAL   | 5  | 1 | 2  | 1 | 346   | 39.8   | 8.82 |        |       |        |        |        |        |        |        |
| M0R2A0    | ER membr     | MAAASAG     | 7  | 2 | 4  | 2 | 371   | 39     | 6.9  | 434.3  | 403.2 | 333.2  | 392.1  | 403.6  | 418    | 380.2  | 363.1  |
| P41217    | OX-2 mem     | MERLVIRM    | 9  | 2 | 4  | 2 | 278   | 31.2   | 8.51 | 281.4  | 163.2 | 156    | 177.1  | 208.6  | 198.4  | 190.4  | 206.1  |
| P04040    | Catalase O   | MADSRDP     | 9  | 4 | 4  | 4 | 527   | 59.7   | 7.39 | 208.2  | 118.8 | 176.6  | 136.9  | 122.1  | 150.9  | 142.6  | 121    |
| Q5T9B7    | Adenylate    | MGCCSSSD    | 6  | 1 | 7  | 1 | 210   | 23.4   | 8.6  | 220.3  | 237.8 | 160.4  | 199.6  | 214.7  | 222.1  | 186    | 184.3  |
| Q6DKI7    | Transmem     | MRTEAQVI    | 4  | 1 | 3  | 1 | 326   | 34.3   | 8.91 | 32.6   | 37.4  | 31.4   | 29.6   | 37.1   | 37     | 36.6   | 38     |
| Q5TBU5    | HCG17736     | MASKGLQI    | 29 | 2 | 4  | 2 | 76    | 7.9    | 5.31 | 357.7  | 354.9 | 235.1  | 329.4  | 387.6  | 376.1  | 334.3  | 329.8  |
| P05091    | Aldehyde c   | MLRAAARF    | 4  | 3 | 17 | 1 | 517   | 56.3   | 7.05 | 405.9  | 337.3 | 286.8  | 386.3  | 392    | 498    | 460.4  | 445.7  |

|          |              |           |    |   |    |   |      |       |      |        |        |        |        |        |        |        |        |
|----------|--------------|-----------|----|---|----|---|------|-------|------|--------|--------|--------|--------|--------|--------|--------|--------|
| P30047   | GTP cyclo    | MPYLLISTC | 40 | 2 | 23 | 2 | 84   | 9.7   | 6.54 | 271.7  | 211.3  | 400.7  | 226.7  | 227.2  | 255.3  | 256.1  | 235.6  |
| H0YBZ2   | HLA class I  | XRSCREDQ  | 6  | 1 | 4  | 1 | 316  | 35.1  | 7.72 | 269.2  | 297.7  | 207.8  | 261.5  | 267.9  | 251    | 279.4  | 274.6  |
| Q9NX12   | cDNA FLJ2    | MVKVTFNS  | 15 | 3 | 5  | 3 | 266  | 30.3  | 5.21 | 22.1   | 17     | 19.4   | 16.7   | 17.3   | 18.2   | 20.1   | 15.3   |
| P04275   | von Willeb   | MIPARFAG  | 1  | 3 | 8  | 3 | 2813 | 309.1 | 5.48 | 105    | 110    | 70.9   | 112.1  | 100.8  | 128.3  | 91.8   | 93.5   |
| A4D0V4   | Capping pr   | MADLEEQL  | 9  | 2 | 5  | 1 | 286  | 32.9  | 5.85 | 38     | 24.1   | 19.3   | 27.7   | 28.4   | 25.3   | 23.7   | 20.4   |
| A0A024R4 | Alkaline ph  | MQGPWVI   | 3  | 2 | 4  | 2 | 528  | 56.8  | 5.86 | 95.8   | 84     | 42.8   | 64.5   | 71.3   | 54.8   | 77.3   | 60.2   |
| A0A0B4J1 | Immunogl     | MEFGLSW   | 15 | 2 | 10 | 1 | 119  | 13.2  | 7.85 | 866.3  | 781.2  | 845    | 956.7  | 917    | 770.6  | 938.3  | 818.1  |
| A0A0C4DH | Protein IGF  | MQFVLSW   | 9  | 1 | 4  | 1 | 116  | 12.8  | 9.25 | 329.9  | 264.4  | 234.3  | 265.1  | 232    | 232.8  | 197.9  | 198.3  |
| A0A140VJ | Testicular t | MAAATGP   | 3  | 1 | 3  | 1 | 493  | 54.5  | 6    | 62.9   | 44.8   | 45     | 42.9   | 48.2   | 48.5   | 44.2   | 45.8   |
| P38606   | V-type pro   | MDFSKLPK  | 5  | 3 | 7  | 3 | 617  | 68.3  | 5.52 | 579.3  | 472.7  | 392.9  | 491.1  | 551.3  | 557.4  | 412.8  | 392.4  |
| Q13443   | Disintegrin  | MGSGARF   | 3  | 2 | 2  | 2 | 819  | 90.5  | 7.52 | 138.9  | 101.6  | 111.1  | 119.6  | 137.6  | 125.2  | 124.1  | 139.8  |
| P03951   | Coagulatio   | MIFLYQVV  | 6  | 3 | 6  | 3 | 625  | 70.1  | 8.1  | 89.1   | 92.9   | 65.7   | 73     | 80.2   | 71.8   | 81     | 77.2   |
| P13688   | Carcinoem    | MGHLSAPL  | 5  | 2 | 27 | 1 | 526  | 57.5  | 5.97 | 101.9  | 81.2   | 145    | 97.9   | 93.1   | 90.4   | 64.8   | 77.3   |
| F1T0L0   | LY6/PLAUF    | MRGTRLAL  | 11 | 1 | 8  | 1 | 125  | 13.1  | 5.96 | 254.5  | 198.8  | 474.9  | 235    | 245.6  | 197.6  | 199.8  | 291.3  |
| A0A0F7TA | IGHV5-51 p   | GAEVKKPG  | 22 | 2 | 9  | 2 | 110  | 12.1  | 8.38 | 341.1  | 267.2  | 284.3  | 304.6  | 319.3  | 352.1  | 334.6  | 298.3  |
| Q68CJ9   | Cyclic AMP   | MNTDLAA   | 7  | 2 | 39 | 2 | 461  | 49    | 5.15 | 1786.2 | 1292.7 | 1177.1 | 1312.2 | 1536.9 | 1710.6 | 1563.2 | 1983.8 |
| P48740   | Mannan-bi    | MRWLLLY   | 6  | 3 | 4  | 3 | 699  | 79.2  | 5.49 | 95.1   | 87     | 77.2   | 83.6   | 78.7   | 79.9   | 65.6   | 79.2   |
| H0YMD1   | Low-densit   | MGPWGW    | 2  | 2 | 13 | 2 | 948  | 104.7 | 5.5  | 1161.4 | 1156.6 | 819.6  | 1033.7 | 1101.8 | 1176.6 | 994.7  | 1237.7 |
| A0A140VJ | Guanylate    | MPGPRRP   | 2  | 2 | 4  | 2 | 1061 | 118.8 | 6.64 | 122.6  | 80.2   | 107.8  | 76.9   | 87.7   | 104.5  | 68.1   | 82.9   |
| Q8N474   | Secreted fr  | MGIGRSEG  | 9  | 2 | 4  | 2 | 314  | 35.4  | 8.85 | 69.1   | 72.5   | 46.7   | 66.6   | 78.1   | 97.4   | 53.2   | 63.3   |
| B2RD15   | cDNA, FLJ9   | MSEIITPV  | 4  | 2 | 3  | 2 | 714  | 81.8  | 5.54 | 177.4  | 176.8  | 133.6  | 178    | 171    | 153.7  | 156.2  | 146.3  |
| A0A024R2 | Cysteine-ri  | MAPWPPK   | 5  | 2 | 4  | 2 | 420  | 45.4  | 4.87 | 54.2   | 33.9   | 42.3   | 40.8   | 50.5   | 55.8   | 52.7   | 54.1   |
| P01601   | Immunogl     | MDMRVLA   | 14 | 1 | 3  | 1 | 117  | 12.7  | 7.74 | 36.6   | 46.7   | 35.4   | 38.1   | 42.3   | 46     | 41.2   | 45.5   |
| P08246   | Neutrophil   | MTLGRRLA  | 6  | 2 | 11 | 2 | 267  | 28.5  | 9.35 | 698    | 435.3  | 307.3  | 476.7  | 467.3  | 783.7  | 579    | 343.6  |
| Q9NP84   | Tumor nec    | MARGSLRF  | 8  | 1 | 9  | 1 | 129  | 13.9  | 8.95 | 783    | 972.6  | 539.2  | 805.6  | 815.5  | 1053.8 | 932.4  | 882.1  |
| P61604   | 10 kDa hea   | MAGQAFR   | 30 | 3 | 3  | 3 | 102  | 10.9  | 8.92 | 81.8   | 68.9   | 45.4   | 67     | 89.2   | 94.9   | 63.5   | 96.8   |
| Q06828   | Fibromodu    | MQWTSLLI  | 5  | 2 | 5  | 2 | 376  | 43.2  | 6.04 | 329.9  | 449.2  | 272.6  | 305.2  | 322.7  | 329.6  | 269.3  | 345.6  |
| Q86SQ8   | Beta-defer   | GNFLTGLG  | 21 | 1 | 13 | 1 | 47   | 5.1   | 8.73 | 304.5  | 470.9  | 245.3  | 347.5  | 277.7  | 309.6  | 583.1  | 268.5  |
| A6XMV9   | Protease s   | MNLLLILTF | 15 | 3 | 5  | 1 | 261  | 28    | 5.14 | 103.6  | 144    | 75.1   | 86.9   | 108.9  | 87     | 97.4   | 95.5   |
| A8K669   | cDNA FLJ7    | MVWQVAV   | 4  | 1 | 3  | 1 | 433  | 49.4  | 6.55 | 48.8   | 35.1   | 69.4   | 29.6   | 27     | 40.1   | 34.2   | 30.4   |
| P09529   | Inhibin bet  | MDGLPGR   | 2  | 1 | 6  | 1 | 407  | 45.1  | 8.03 | 193.1  | 181.7  | 158.5  | 180.3  | 203    | 216.8  | 175.3  | 189.4  |
| P29966   | Myristoyla   | MGAQFSK   | 5  | 1 | 4  | 1 | 332  | 31.5  | 4.45 | 286.4  | 232.1  | 274.9  | 281.1  | 333.6  | 319.7  | 267.5  | 270.4  |
| A2J1M8   | Rheumatoi    | LVESGGGV  | 21 | 2 | 10 | 1 | 95   | 10.7  | 7.99 |        |        |        |        |        |        |        |        |
| A0A0K0K1 | Epididymis   | MAMLRVC   | 13 | 3 | 8  | 3 | 249  | 28.7  | 6.02 | 527.2  | 321.9  | 331.9  | 393.6  | 454.7  | 466.8  | 389.6  | 331.6  |
| B4DQD2   | cDNA FLJ5    | MPLLTLYLI | 7  | 2 | 3  | 2 | 305  | 33.8  | 5.88 | 162.5  | 163.7  | 120.1  | 147.7  | 148.9  | 178.4  | 182.9  | 141    |
| P01706   | Immunogl     | MAWALLLI  | 7  | 1 | 8  | 1 | 119  | 12.6  | 7.24 | 595.3  | 572.2  | 482.2  | 505.5  | 498.8  | 632.5  | 881.9  | 669.4  |
| Q8NBS9   | Thioredoxi   | MPARPGR   | 7  | 3 | 9  | 3 | 432  | 47.6  | 5.97 | 455    | 427.6  | 373.8  | 415.5  | 450.1  | 418.8  | 437.5  | 401.7  |
| D3DRD5   | Fibroblast   | MGLTSTW   | 1  | 1 | 7  | 1 | 838  | 93.8  | 6.04 | 443.1  | 377.3  | 337.9  | 395.2  | 419.3  | 410.9  | 350.7  | 462.5  |
| Q8TCT8   | Signal pept  | MGPQRRS   | 3  | 1 | 8  | 1 | 520  | 58.1  | 8.32 | 324.4  | 255.8  | 225.6  | 298.9  | 321.8  | 252.6  | 300.1  | 348.3  |
| J3KQ18   | D-dopachr    | MQLFLAV   | 23 | 3 | 7  | 3 | 132  | 14.2  | 7.3  | 368.8  | 226.4  | 211    | 209.5  | 294.9  | 265.2  | 220.2  | 220.3  |
| Q53GD1   | Guanine nu   | MSSKTAST  | 22 | 1 | 3  | 1 | 72   | 8     | 8.97 | 123.9  | 102    | 115.1  | 94.5   | 103.4  | 99.5   | 98     | 93.5   |

|           |              |           |    |   |    |   |      |       |       |        |        |        |        |        |        |        |       |
|-----------|--------------|-----------|----|---|----|---|------|-------|-------|--------|--------|--------|--------|--------|--------|--------|-------|
| A0A087WV  | Glycoprote   | MDYYRKYA  | 5  | 1 | 8  | 1 | 147  | 16.3  | 8.47  | 439.2  | 500.6  | 302.8  | 385.9  | 442.7  | 516.7  | 398    | 415.7 |
| P14174    | Macrophag    | MPMFIVN   | 8  | 1 | 30 | 1 | 115  | 12.5  | 7.88  | 2360.8 | 1882.7 | 1457.4 | 1941.2 | 2284.4 | 2061.6 | 1939.5 | 1538  |
| P50897    | Palmitoyl-p  | MASPGCLV  | 5  | 1 | 5  | 1 | 306  | 34.2  | 6.52  | 178.1  | 142.9  | 153.5  | 153.4  | 175.5  | 155.9  | 136.5  | 155.9 |
| A0A024R8  | L-selectin ( | MGCRRTRI  | 7  | 2 | 5  | 2 | 385  | 43.6  | 7.15  | 249.1  | 228.8  | 238.7  | 271.7  | 235.9  | 240.4  | 289.1  | 313   |
| Q7LOX0    | TLR4 intere  | MEAARALF  | 1  | 1 | 4  | 1 | 811  | 88.7  | 9.6   | 187.3  | 173.1  | 115.2  | 164.8  | 187.9  | 186.2  | 147.4  | 179.7 |
| Q53H93    | Diphtheria   | MKLLPSVV  | 5  | 1 | 5  | 1 | 208  | 23.1  | 9.38  |        |        |        |        |        |        |        |       |
| P05387    | 60S acidic   | MRYVASYL  | 10 | 1 | 7  | 1 | 115  | 11.7  | 4.54  |        |        |        |        |        |        |        |       |
| A0A0J9YX3 | Uncharact    | MEFWLSW   | 19 | 2 | 6  | 2 | 117  | 12.8  | 7.85  | 259.7  | 205.1  | 225.1  | 222.3  | 237.7  | 210.6  | 210.6  | 201.9 |
| J3QL71    | Secernin-2   | MERPASPC  | 4  | 1 | 1  | 1 | 433  | 47.5  | 5.68  | 64.9   | 53     | 89.4   | 62.7   | 69     | 68.1   | 62.9   | 68.1  |
| P30039    | Phenazine    | MKLPIFIAD | 10 | 2 | 5  | 2 | 288  | 31.8  | 6.52  | 187.9  | 134.4  | 286.2  | 158.6  | 167.2  | 157.2  | 147.8  | 152.6 |
| A2NH53    | Immunogo     | THGEIVMT  | 19 | 1 | 1  | 1 | 112  | 12.2  | 8.51  | 71     | 95     | 94.4   | 82.9   | 84.2   | 76.1   | 72.6   | 76.9  |
| P83110    | Serine prot  | MQARALLI  | 5  | 2 | 4  | 2 | 453  | 48.6  | 7.09  | 68.8   | 85.8   | 54.8   | 74     | 81.9   | 67.3   | 71.2   | 63.3  |
| Q9UN73    | Protocadh    | MVFTPEDF  | 3  | 2 | 2  | 2 | 950  | 102.7 | 5.06  | 31.1   | 31.4   | 29.3   | 36.9   | 43.9   | 29.8   | 37     | 40.4  |
| O75223    | Gamma-gli    | MANSGCKI  | 12 | 2 | 8  | 2 | 188  | 21    | 5.14  | 224.9  | 183.1  | 139.5  | 198.5  | 196.5  | 192.5  | 198.6  | 195.6 |
| Q86V85    | Integral me  | MGGLRLLA  | 2  | 1 | 5  | 1 | 440  | 49.4  | 7.39  | 176.3  | 212.7  | 185.7  | 190.2  | 191.9  | 186    | 184.9  | 196.6 |
| Q9UBX1    | Cathepsin    | MAPWLQL   | 4  | 2 | 6  | 2 | 484  | 53.3  | 8.22  | 122.2  | 112.4  | 74.8   | 106.5  | 117.2  | 117    | 107.9  | 111.4 |
| P54727    | UV excisio   | MQVTLKTL  | 2  | 1 | 2  | 1 | 409  | 43.1  | 4.84  | 245.5  | 263.1  | 184.6  | 226.1  | 247.5  | 243.2  | 225.8  | 221.8 |
| A0A0U1RR  | Histone H2   | MSGRGKQ   | 14 | 3 | 13 | 3 | 170  | 18.5  | 11.52 | 1265.2 | 1004.6 | 657    | 736.5  | 768.7  | 1312.5 | 1501.5 | 601.7 |
| A0A024RA  | Arylsulfata  | MGPRGAA   | 3  | 2 | 5  | 2 | 533  | 59.6  | 8.21  | 348.4  | 208.9  | 177.6  | 252.2  | 249    | 377.4  | 280.4  | 236.9 |
| C6SUN5    | Agouti rela  | MLTAAVLS  | 12 | 1 | 8  | 1 | 132  | 14.4  | 7.44  | 57.6   | 51.7   | 45.4   | 57.9   | 59.5   | 56.1   | 44.4   | 40.8  |
| P01258    | Calcitonin   | MGFQKFSF  | 13 | 2 | 2  | 2 | 141  | 15.5  | 6.52  | 337.3  | 256.4  | 244.8  | 394.7  | 377.9  | 484.4  | 337.8  | 403.3 |
| A8K9M5    | cDNA FLJ7    | MKNSRTW   | 4  | 2 | 5  | 2 | 591  | 67    | 8.18  | 266.1  | 179    | 218.4  | 235.1  | 237.7  | 231.4  | 297.9  | 227.6 |
| C9JJE7    | Mucin-20 (   | MGCLWGL   | 4  | 2 | 5  | 2 | 723  | 73.1  | 4.94  | 231.2  | 183.3  | 172.6  | 174.9  | 230.8  | 225.1  | 214    | 232.7 |
| B2R880    | cDNA, FLJ9   | MANCEFSP  | 4  | 1 | 3  | 1 | 300  | 34.3  | 7.47  | 59.7   | 50.9   | 44.9   | 37.9   | 43.2   | 25.8   | 28.1   | 44.1  |
| B4E3D4    | cDNA FLJ5    | MILPEALYL | 1  | 1 | 3  | 1 | 607  | 68    | 6.19  | 247.5  | 237.5  | 207.8  | 288.2  | 251.5  | 268.3  | 235.3  | 227.7 |
| B4EOV9    | cDNA FLJ6    | MSENTKET  | 6  | 1 | 5  | 1 | 246  | 27.7  | 8.25  | 321.7  | 188.6  | 267.3  | 234.5  | 234.7  | 313.8  | 269.9  | 247.7 |
| A0A024RA  | Bridging in  | MAEMGSK   | 5  | 2 | 3  | 2 | 593  | 64.7  | 5.06  | 102.2  | 99.4   | 80.5   | 99.3   | 100.3  | 93.2   | 104.4  | 97.9  |
| P29401    | Transketol   | MESYHKPD  | 5  | 2 | 3  | 2 | 623  | 67.8  | 7.66  | 169.1  | 153.2  | 86.8   | 120.2  | 135.8  | 144.1  | 143    | 98.4  |
| A0A0K0K1  | Proteasom    | MSYDRAIT  | 9  | 2 | 3  | 2 | 248  | 27.9  | 8.46  | 193.9  | 139.1  | 136.1  | 143.2  | 168    | 156.9  | 135.8  | 153.3 |
| A8K2N0    | cDNA FLJ7    | MWCIVLFS  | 4  | 2 | 7  | 2 | 688  | 76.6  | 4.98  | 248.6  | 174.1  | 212.7  | 218.5  | 219.3  | 215.7  | 198.7  | 191.2 |
| P16402    | Histone H1   | MSETAPLA  | 5  | 1 | 4  | 1 | 221  | 22.3  | 11.02 | 425.3  | 325.7  | 311.8  | 319.2  | 351.6  | 338.8  | 357.1  | 316   |
| Q92484    | Acid sphing  | MALVRALV  | 5  | 2 | 3  | 2 | 453  | 51.2  | 6.33  | 64.5   | 69.1   | 58.4   | 76.4   | 59.9   | 50.5   | 56.8   | 52    |
| Q4G0I0    | Protein CC   | MNRVLCAI  | 17 | 2 | 2  | 2 | 132  | 15    | 7.02  | 46.9   | 48.4   | 40     | 40.9   | 38.6   | 52.8   | 42     | 42    |
| B4DHQ3    | Phosphose    | MGRRLGAI  | 5  | 2 | 7  | 2 | 415  | 45.3  | 9.03  | 68.4   | 66.7   | 45.6   | 56.6   | 71.6   | 78     | 38.4   | 55.9  |
| A0A0F7RQ  | Luteinizing  | MEMLQGL   | 11 | 1 | 6  | 1 | 141  | 15.3  | 7.74  | 203.3  | 177.7  | 116.7  | 157.6  | 162.8  | 197.7  | 141.3  | 148.7 |
| Q9H1C7    | Cysteine-ri  | MNQENPP   | 10 | 1 | 2  | 1 | 97   | 10.6  | 4.32  | 66.4   | 79.3   | 49.4   | 76.9   | 75.7   | 72.3   | 81.3   | 70    |
| Q02388    | Collagen al  | MTLRLLLVA | 0  | 1 | 4  | 1 | 2944 | 295   | 6.27  | 200    | 209.7  | 150.4  | 208.5  | 191.1  | 184.6  | 152.2  | 159.4 |
| A0A0A1HA  | H.sapiens r  | MAYAYLFK  | 14 | 2 | 5  | 2 | 212  | 23.6  | 6.54  | 208.1  | 93.3   | 122.1  | 95.6   | 100.7  | 107.1  | 91     | 92.1  |
| Q6E0U4    | Dermokine    | MKFQGPLA  | 4  | 2 | 5  | 2 | 476  | 47.1  | 7.28  | 434.7  | 622    | 343    | 499.8  | 432.9  | 610.5  | 569.4  | 502.4 |
| P30626    | Sorcin OS=   | MAYPGHP   | 17 | 3 | 7  | 3 | 198  | 21.7  | 5.59  | 208.4  | 190.1  | 185.6  | 186.5  | 193.4  | 193.2  | 175.9  | 172.9 |
| B4DMN1    | cDNA FLJ6    | MAQRQGC   | 9  | 2 | 2  | 2 | 261  | 28.8  | 8.38  | 101.6  | 87.7   | 83.3   | 97     | 102.7  | 99.1   | 92.1   | 97.6  |

|          |               |           |    |   |    |   |      |       |      |        |        |        |        |        |        |        |        |
|----------|---------------|-----------|----|---|----|---|------|-------|------|--------|--------|--------|--------|--------|--------|--------|--------|
| A0A024R8 | Ubiquitin-r   | MAAPLSVE  | 13 | 1 | 8  | 1 | 101  | 11.4  | 4.67 | 94.2   | 79.6   | 89.2   | 85.5   | 91.8   | 83.7   | 80.4   | 75.6   |
| P24298   | Alanine ar    | MASSTGDF  | 4  | 2 | 2  | 2 | 496  | 54.6  | 7.18 | 107.8  | 66.1   | 60.3   | 75.7   | 80.6   | 75     | 58     | 57.6   |
| V9HW88   | Calreticulir  | MLLSVPLLI | 10 | 4 | 6  | 4 | 417  | 48.1  | 4.44 | 81.1   | 58.9   | 57.1   | 59.9   | 74.5   | 70.8   | 75.2   | 75     |
| Q6UY14   | ADAMTS-li     | MENWTGF   | 2  | 2 | 3  | 2 | 1074 | 116.5 | 8.34 | 196.7  | 182.4  | 159.1  | 186.5  | 216.3  | 223.5  | 230.7  | 255.7  |
| P07360   | Compleme      | MLPPGTAT  | 7  | 1 | 1  | 1 | 202  | 22.3  | 8.31 | 56.8   | 57.3   | 47.2   | 45.5   | 54.2   | 59.1   | 41.9   | 45.6   |
| E7EMK3   | Flotillin-2 C | MGNCHTV   | 5  | 2 | 3  | 2 | 483  | 53.1  | 5.24 | 47.2   | 32.1   | 29.1   | 33     | 27.2   | 29.6   | 23.8   | 27.6   |
| P49773   | Histidine tr  | MADEIAKA  | 21 | 2 | 6  | 2 | 126  | 13.8  | 6.95 | 303.5  | 250.6  | 213.6  | 265    | 317.5  | 283.1  | 231.7  | 222.4  |
| Q6PK18   | 2-oxogluta    | MAPQRRR   | 10 | 3 | 4  | 3 | 319  | 35.6  | 8.18 | 22.6   | 16.8   | 10.6   | 16.8   | 17.5   | 22.5   | 17.3   | 16.9   |
| B2R6U9   | Delta-like p  | MRSRTRC   | 3  | 3 | 5  | 3 | 1218 | 133.8 | 6.06 | 760.5  | 673    | 681.9  | 773.3  | 799    | 730.2  | 685.2  | 856.5  |
| O94985   | Calsyntenin   | MLRRPAPA  | 2  | 2 | 5  | 2 | 981  | 109.7 | 4.91 | 369.1  | 348.3  | 362.2  | 317.9  | 351.9  | 320.1  | 299.6  | 316.3  |
| O95196   | Chondroitin   | MGRAGGG   | 2  | 1 | 2  | 1 | 566  | 60    | 4.5  | 97.4   | 99.4   | 71.7   | 97.3   | 87.8   | 100.5  | 91     | 103.8  |
| B4DJ06   | cDNA FLJ5     | MTAEGPSF  | 3  | 2 | 6  | 2 | 629  | 67.9  | 4.91 | 625    | 596.7  | 514.3  | 607.2  | 615.8  | 661.2  | 602.6  | 626.6  |
| Q9UM47   | Neurogenin    | MGPARG    | 1  | 1 | 1  | 1 | 2321 | 243.5 | 5.39 | 77.9   | 56.7   | 56.7   | 63.1   | 64.2   | 55.7   | 59.5   | 65.6   |
| Q9UL82   | Myosin-re     | SYELTQPSS | 17 | 2 | 15 | 2 | 107  | 11.4  | 6.6  | 743.1  | 1333.8 | 663.3  | 916.6  | 800    | 1182.3 | 1116.4 | 916.9  |
| Q12929   | Epidermal     | MNGHISNF  | 4  | 3 | 4  | 3 | 822  | 91.8  | 7.5  | 155.1  | 115.3  | 95.4   | 125    | 132.6  | 137.4  | 107    | 99.3   |
| Q86VB7   | Scavenger     | MSKLRMV   | 2  | 2 | 5  | 2 | 1156 | 125.4 | 5.95 | 412.1  | 419    | 271.5  | 341.3  | 329.9  | 317.9  | 385.1  | 313    |
| A0A024RC | Desmocollin   | MAAAGPR   | 2  | 1 | 3  | 1 | 896  | 99.9  | 6.1  | 188.6  | 189.1  | 144.7  | 204    | 213.5  | 188.5  | 171.5  | 207.8  |
| A8K144   | cDNA FLJ7     | MAQLFLPL  | 1  | 1 | 7  | 1 | 911  | 99.1  | 4.68 | 930.9  | 848.6  | 1135.9 | 842.5  | 861.5  | 991.5  | 634.4  | 882.3  |
| A0A125U0 | GCT-A2 he     | EVQLVESG  | 15 | 1 | 18 | 1 | 126  | 13.8  | 5.45 | 140.8  | 103.1  | 176.5  | 110.8  | 113.3  | 132    | 112.7  | 115.8  |
| A0A024RC | CD99 antig    | MVAWRSA   | 6  | 1 | 4  | 1 | 262  | 28    | 5.14 | 161.6  | 144.2  | 84.6   | 120.6  | 104.1  | 107.1  | 112    | 94.6   |
| O15144   | Actin-relat   | MILLEVNN  | 8  | 2 | 2  | 2 | 300  | 34.3  | 7.36 | 96.8   | 118.4  | 58.1   | 97.7   | 91.1   | 119.6  | 70.8   | 87     |
| Q6UW14   | Protein shi   | MWGARRS   | 5  | 1 | 3  | 1 | 295  | 31.4  | 7.68 | 202.1  | 167.2  | 173.4  | 150.2  | 163    | 165.9  | 158.3  | 160.1  |
| Q9UL75   | Myosin-re     | QVQLQQSC  | 13 | 2 | 22 | 1 | 122  | 13.7  | 8.46 | 204    | 157.4  | 158.5  | 196.9  | 212.6  | 186.8  | 210.6  | 216.4  |
| Q6UXB4   | C-type lect   | MDTTRYSK  | 5  | 2 | 35 | 2 | 293  | 32.5  | 6.61 | 2538.5 | 2606.1 | 2702.7 | 2706.2 | 2743.9 | 2656.2 | 2493.7 | 2672   |
| P06734   | Low affinit   | MEEGQYSE  | 9  | 3 | 5  | 3 | 321  | 36.4  | 5.57 | 267.8  | 227.4  | 167.2  | 234.7  | 236.7  | 250.8  | 192.1  | 203.8  |
| P99999   | Cytochrom     | MGDVEKG   | 18 | 2 | 6  | 2 | 105  | 11.7  | 9.57 | 201.5  | 149.1  | 130.2  | 175.2  | 218.2  | 205    | 198.7  | 193.2  |
| Q59EB6   | Compleme      | KLLSPLGFS | 3  | 2 | 18 | 1 | 671  | 70.4  | 5.44 | 109    | 111.3  | 89.9   | 107.9  | 112.1  | 108.5  | 107.6  | 115.4  |
| A0A087W1 | Proline-ric   | MWRGIDS   | 10 | 1 | 4  | 1 | 147  | 16.9  | 7.52 | 479.1  | 437.1  | 306.2  | 521.4  | 446.1  | 479.8  | 579.7  | 379.1  |
| P55786   | Puromycin     | MWLAAAA   | 4  | 3 | 3  | 3 | 919  | 103.2 | 5.72 | 36.4   | 23     | 20.8   | 29.7   | 24.1   | 32.9   | 19.7   | 23.7   |
| P08253   | 72 kDa typ    | MEALMAR   | 2  | 1 | 4  | 1 | 660  | 73.8  | 5.47 | 450.4  | 374.4  | 319.4  | 455.1  | 467.9  | 427.8  | 440.5  | 397.7  |
| A0A0X9US | MS-A6 hea     | QVQLVQSC  | 16 | 2 | 2  | 1 | 118  | 12.7  | 8.44 | 112.7  | 93.7   | 128    | 95.1   | 93.6   | 99.8   | 83.3   | 89     |
| P05026   | Sodium/po     | MARGKAKI  | 9  | 2 | 8  | 2 | 303  | 35    | 8.53 | 356.5  | 377.7  | 234.5  | 333.6  | 337    | 348.8  | 260.5  | 330.7  |
| A0A0C4DH | Protein IGF   | MEFGLSWY  | 9  | 1 | 7  | 1 | 117  | 12.8  | 7.88 | 675.8  | 478.8  | 693.6  | 631.1  | 625.7  | 519.5  | 629.1  | 655.5  |
| P49908   | Selenoprot    | MWRSLGL   | 4  | 2 | 12 | 2 | 381  | 43.2  | 7.87 | 877.6  | 810.3  | 674.7  | 816.2  | 890.8  | 881.1  | 832.8  | 1007.4 |
| A0A0A0M1 | Protein IGF   | LTFGGGTK  | 67 | 1 | 6  | 1 | 12   | 1.2   | 8.84 | 890.9  | 947.2  | 637.4  | 760    | 1080   | 920.6  | 710.9  | 836.2  |
| Q14210   | Lymphocyt     | MRTALLLL  | 7  | 1 | 5  | 1 | 128  | 13.3  | 8.21 | 892.2  | 1131.4 | 695.9  | 1037.5 | 1030.1 | 1101.4 | 710.4  | 834.8  |
| Q59ER5   | WD repeat     | RAGPGGSF  | 2  | 1 | 2  | 1 | 624  | 68.1  | 7.23 | 103.8  | 59.3   | 55.6   | 64.5   | 74.1   | 90.3   | 65.6   | 59.9   |
| B3KTG0   | cDNA FLJ3     | MCSTMSAI  | 4  | 1 | 2  | 1 | 342  | 36.9  | 5.85 | 41.2   | 32.3   | 46.7   | 36.6   | 44.9   | 47     | 32.5   | 36.2   |
| A2N2F4   | VK3 protei    | LTQSPGTL  | 8  | 1 | 15 | 1 | 108  | 11.9  | 9.51 | 254.5  | 491.3  | 198.9  | 269.7  | 305.8  | 289.6  | 279.5  | 285.9  |
| A0A193CH | 10E8 light    | SSELTQDP  | 17 | 2 | 5  | 2 | 109  | 11.6  | 7.96 | 372.6  | 422.7  | 502.2  | 415.8  | 365.1  | 544.3  | 476.1  | 444    |
| Q9Y4L1   | Hypoxia up    | MADKVRRL  | 2  | 1 | 2  | 1 | 999  | 111.3 | 5.22 | 22.8   | 15.6   | 24.1   | 15.4   | 20.8   | 19.8   | 16.2   | 20.5   |

|          |             |           |    |   |    |   |      |       |       |        |        |       |       |       |        |        |       |  |
|----------|-------------|-----------|----|---|----|---|------|-------|-------|--------|--------|-------|-------|-------|--------|--------|-------|--|
| P27930   | Interleukin | MLRLYVLV  | 5  | 2 | 2  | 2 | 398  | 45.4  | 7.9   |        |        |       |       |       |        |        |       |  |
| A8K6C9   | cDNA FLJ7   | MGIPMGK   | 9  | 2 | 8  | 2 | 180  | 20.2  | 9.32  | 240.9  | 365.4  | 149   | 244.8 | 221.6 | 240.3  | 301    | 272.2 |  |
| A0A140VK | Transaldol  | MSSSPVKR  | 6  | 2 | 5  | 2 | 337  | 37.5  | 6.81  | 292.6  | 233.8  | 171.3 | 269.6 | 253   | 318.9  | 364.6  | 211   |  |
| P37802   | Transgelin  | MANRGPA   | 19 | 3 | 5  | 3 | 199  | 22.4  | 8.25  | 141.4  | 104.2  | 169.7 | 130.8 | 138.6 | 125.8  | 143.9  | 116.5 |  |
| Q9UQN3   | Charged m   | MASLFKKK  | 13 | 3 | 6  | 3 | 213  | 23.9  | 8.76  | 234.2  | 189.7  | 168.8 | 214.4 | 206.1 | 235.6  | 156.6  | 188.2 |  |
| B2R4F3   | cDNA, FLJ9  | MTEKAPEP  | 6  | 1 | 2  | 1 | 201  | 22.9  | 5.3   | 168.2  | 99.1   | 95.3  | 132.3 | 118.3 | 126.8  | 143.1  | 117.3 |  |
| J3QRS3   | Myosin reg  | MDLTTTM   | 12 | 2 | 2  | 2 | 177  | 20.4  | 4.75  | 42.5   | 39.1   | 23.9  | 31    | 30.9  | 40.9   | 39.6   | 35.4  |  |
| Q96QS0   | Putative m  | MDWTWR    | 11 | 2 | 3  | 1 | 159  | 17.5  | 9.29  | 120.8  | 106.1  | 111.5 | 106.1 | 125   | 105.8  | 131    | 126.5 |  |
| P18428   | Lipopolysa  | MGALARAI  | 5  | 2 | 9  | 2 | 481  | 53.4  | 6.7   | 352    | 289.9  | 263   | 288.8 | 340.7 | 328    | 428.6  | 258   |  |
| P98161   | Polycystin  | MPPAAPAF  | 0  | 1 | 4  | 1 | 4303 | 462.2 | 6.73  | 180.8  | 161.5  | 151.3 | 154.8 | 161.3 | 156.1  | 133.4  | 161.1 |  |
| Q14112   | Nidogen-2   | MEGDRVA   | 2  | 2 | 3  | 2 | 1375 | 151.2 | 5.29  | 136.9  | 111    | 115.9 | 117.9 | 105   | 110.9  | 102    | 113.6 |  |
| A0A1B1CY | Vitamin D   | LAERLKAKL | 32 | 1 | 8  | 1 | 34   | 3.7   | 8.56  | 504.5  | 309.5  | 867.1 | 484.5 | 320.7 | 325.4  | 236.3  | 346.4 |  |
| I3L504   | Eukaryotic  | MADDLDFI  | 6  | 1 | 7  | 1 | 186  | 20.5  | 5.25  | 246.8  | 234.1  | 145.1 | 217.5 | 209.8 | 214.1  | 171.6  | 170.1 |  |
| Q53HU8   | Vimentin v  | MSTRSVSS  | 6  | 3 | 4  | 2 | 466  | 53.7  | 5.12  | 52.8   | 36.1   | 30.6  | 31.6  | 31.1  | 40.4   | 39.4   | 35.3  |  |
| Q8TBP5   | Membrane    | MKASQCC   | 5  | 1 | 3  | 1 | 190  | 19.9  | 6.33  | 147.6  | 111    | 106.1 | 153.3 | 148.7 | 138.3  | 127.4  | 157.3 |  |
| B2R6W4   | cDNA, FLJ9  | MVCGSPG   | 3  | 1 | 5  | 1 | 325  | 36.2  | 8.37  | 389.3  | 514.4  | 297.3 | 432.2 | 419.4 | 394.1  | 333.2  | 394.5 |  |
| V6A6E5   | MHC class   | MRVMAPR   | 4  | 1 | 2  | 1 | 366  | 40.9  | 6.3   | 74.1   | 88.9   | 64.2  | 84.8  | 76.4  | 82.1   | 65.1   | 78.4  |  |
| P82980   | Retinol-bin | MPPNLTGY  | 7  | 1 | 9  | 1 | 135  | 15.9  | 6.54  | 757.5  | 632    | 453.8 | 676.4 | 864.8 | 746.1  | 595.4  | 701.1 |  |
| A0A0X9T7 | MS-A6 ligh  | DIQLTQSPA | 15 | 1 | 5  | 1 | 107  | 11.4  | 8.47  | 72.9   | 60.7   | 55.9  | 58.5  | 52.7  | 68.7   | 54.3   | 54.3  |  |
| F8RHH9   | MHC class   | SHSMRYFS  | 13 | 2 | 3  | 1 | 181  | 21.2  | 7.3   |        |        |       |       |       |        |        |       |  |
| Q14117   | Dihydropyr  | MAAPSRL   | 3  | 2 | 6  | 2 | 519  | 56.6  | 7.27  | 201.8  | 141.6  | 111   | 138.3 | 209.1 | 172.8  | 124.8  | 130.9 |  |
| P19256   | Lymphocyt   | MVAGSDA   | 4  | 1 | 11 | 1 | 250  | 28.1  | 6.76  | 776.7  | 626.6  | 595.5 | 697.1 | 721.6 | 753.2  | 653.8  | 773.2 |  |
| Q86XT2   | Vacuolar p  | MYRARAAL  | 10 | 2 | 4  | 2 | 251  | 27.7  | 9.01  | 58.7   | 62.4   | 53.8  | 65.6  | 69.1  | 61.2   | 66     | 66    |  |
| D2IYL2   | Corneodes   | MGSSRAPV  | 7  | 3 | 3  | 3 | 529  | 51.5  | 8.35  | 520.3  | 544.5  | 442.9 | 475.2 | 444.8 | 430.4  | 364.4  | 415   |  |
| Q5HYL0   | Putative ur | MQRAVPE   | 1  | 1 | 2  | 1 | 967  | 105.3 | 6.83  | 51.4   | 49.3   | 38.6  | 41    | 49.9  | 28.4   | 32.2   | 48.9  |  |
| Q6UWV6   | Ectonuclec  | MRGLAVLL  | 5  | 2 | 3  | 2 | 458  | 51.5  | 6.89  | 219.4  | 157.8  | 192.7 | 178.4 | 197.1 | 172.8  | 150.7  | 193.3 |  |
| K7ES00   | Histone H3  | MARTKQT   | 9  | 2 | 8  | 2 | 151  | 16.6  | 11.84 | 1428.3 | 1016.6 | 681.7 | 754.7 | 827.1 | 1406.8 | 1900.6 | 602.6 |  |
| Q8NC54   | Keratinocy  | MAAAVPKI  | 4  | 1 | 11 | 1 | 265  | 29.2  | 5.08  | 490.9  | 422.4  | 421.1 | 420.2 | 493.8 | 456.3  | 497.4  | 485.1 |  |
| P15907   | Beta-galac  | MIHTNLKK  | 2  | 1 | 2  | 1 | 406  | 46.6  | 9.01  | 91.2   | 67.6   | 79.4  | 77.6  | 75.9  | 104.5  | 67.3   | 75.5  |  |
| P22223   | Cadherin-3  | MGLPRGPI  | 3  | 2 | 54 | 1 | 829  | 91.4  | 4.75  |        |        |       |       |       |        |        |       |  |
| A0A0X9TD | GCT-A3 he   | QVQLQESC  | 13 | 1 | 1  | 1 | 127  | 13.8  | 8.46  |        |        |       |       |       |        |        |       |  |
| Q96MM7   | Heparan-s   | MALPACAV  | 3  | 2 | 3  | 2 | 605  | 69.1  | 9.73  | 138.9  | 122    | 121   | 106.4 | 117.8 | 127.9  | 89.3   | 94.5  |  |
| P25774   | Cathepsin   | MKRLVCVL  | 8  | 2 | 2  | 2 | 331  | 37.5  | 8.34  | 108.5  | 98.8   | 80.5  | 87.4  | 102.4 | 121.4  | 97.5   | 115.9 |  |
| P19075   | Tetraspani  | MAGVSACI  | 4  | 1 | 1  | 1 | 237  | 26    | 5.6   | 207.2  | 165.4  | 218   | 182.1 | 194   | 130.4  | 138.4  | 182   |  |
| B3KT21   | cDNA FLJ3   | MCSGAGV   | 5  | 1 | 2  | 1 | 241  | 26.8  | 7.08  | 92.6   | 74.3   | 70.6  | 75.1  | 87.6  | 100.3  | 74.6   | 99.1  |  |
| V9HW80   | Epididymis  | MASGADSI  | 3  | 2 | 2  | 2 | 806  | 89.3  | 5.26  |        |        |       |       |       |        |        |       |  |
| Q9BS26   | Endoplasm   | MHPAVFLS  | 5  | 2 | 7  | 2 | 406  | 46.9  | 5.26  | 243    | 228.2  | 158.4 | 204.3 | 229.6 | 239.3  | 208.1  | 229.6 |  |
| Q6FGQ5   | ASGR1 pro   | MTKEYQDI  | 4  | 1 | 1  | 1 | 291  | 33.2  | 5.5   | 229.7  | 206.2  | 158.4 | 233.7 | 247.8 | 269.9  | 231.5  | 266.7 |  |
| A8K243   | cDNA FLJ7   | MACTIQKA  | 11 | 3 | 8  | 3 | 387  | 44.7  | 6.74  | 78.2   | 45.5   | 62.4  | 50.4  | 55    | 57.2   | 40.8   | 55    |  |
| P22748   | Carbonic a  | MRMLLALI  | 5  | 2 | 5  | 2 | 312  | 35    | 7.83  | 335.3  | 298.2  | 233.2 | 357.8 | 421.7 | 312.2  | 296.8  | 300.4 |  |
| B4DW34   | cDNA FLJ5   | MRLLAWLI  | 6  | 2 | 2  | 2 | 455  | 50.8  | 5.64  | 49.7   | 38.2   | 44.3  | 47.3  | 42    | 52     | 40.8   | 44.2  |  |

|          |               |          |    |   |    |   |      |       |      |       |        |       |        |       |        |       |        |
|----------|---------------|----------|----|---|----|---|------|-------|------|-------|--------|-------|--------|-------|--------|-------|--------|
| Q9UN66   | Protocadherin | MEASGKLK | 2  | 1 | 2  | 1 | 801  | 87.6  | 4.88 | 45    | 31     | 49.9  | 33.1   | 40.7  | 41.5   | 31.4  | 45.3   |
| A4D1W8   | Ependymin     | MPPRMLV  | 7  | 2 | 8  | 2 | 344  | 38.1  | 9.58 | 406.2 | 412.1  | 301.2 | 360.1  | 393.5 | 365.2  | 408.3 | 403.7  |
| O43488   | Aflatoxin B   | MLSAASRV | 4  | 1 | 1  | 1 | 359  | 39.6  | 7.17 | 24.5  | 21.3   | 15.4  | 15.7   | 27    | 23.8   | 15.2  | 18.6   |
| Q8WWZ8   | Oncoprotein   | MPPFLLTC | 2  | 1 | 5  | 1 | 545  | 60    | 5.58 | 130.7 | 103.9  | 78.8  | 104.1  | 90.5  | 106.3  | 102.2 | 90.4   |
| B2R7D1   | cDNA, FLJ9    | MMDASKE  | 2  | 2 | 7  | 2 | 684  | 77.1  | 6.76 | 55.5  | 20.2   | 47.3  | 39.5   | 47.6  | 23     | 17.2  | 39.4   |
| Q9BUD6   | Spondin-2     | MENPSPA  | 5  | 2 | 2  | 2 | 331  | 35.8  | 5.52 | 84.6  | 153    | 94.8  | 94.6   | 108.7 | 72.1   | 73    | 86.9   |
| B5MCA4   | Epithelial c  | METKHLGF | 8  | 2 | 2  | 2 | 342  | 37.9  | 8.47 |       |        |       |        |       |        |       |        |
| A0AVF1   | Intraflagell  | MMLSRAK  | 1  | 1 | 17 | 1 | 554  | 64.1  | 6.93 | 989.9 | 1068.8 | 738.7 | 1308.1 | 1250  | 1127.4 | 850.5 | 1223.2 |
| Q9NZV1   | Cysteine-ri   | MYLVAGDI | 3  | 2 | 3  | 2 | 1036 | 113.7 | 5.21 | 75.1  | 85.6   | 67.2  | 89.7   | 82.2  | 96.3   | 66.9  | 79.9   |
| Q86X29   | Lipolysis-st  | MQQDGLG  | 2  | 1 | 1  | 1 | 649  | 71.4  | 7.97 | 69.9  | 72.6   | 58.2  | 69     | 77    | 56     | 62.5  | 57.1   |
| A0A024R8 | ATPase, H+    | MASQSQG  | 9  | 1 | 2  | 1 | 118  | 13.7  | 8.79 | 99.1  | 83.5   | 70.3  | 98.9   | 90.4  | 82.9   | 71.4  | 71.8   |
| P49767   | Vascular er   | MHLLGFFS | 3  | 1 | 2  | 1 | 419  | 46.9  | 7.52 |       |        |       |        |       |        |       |        |
| A0A024R1 | Leukotrien    | MVRTKTW  | 4  | 1 | 2  | 1 | 329  | 35.9  | 8.29 | 77.5  | 61.8   | 51.5  | 61.2   | 64.7  | 58.9   | 63.2  | 62.7   |
| A1L471   | ATP-bindin    | MDLEGDR  | 2  | 2 | 3  | 2 | 1280 | 141.4 | 9    | 125.8 | 86.1   | 96.3  | 96.5   | 119.6 | 123.2  | 74    | 121    |
| A8K2T7   | Receptor p    | MRPSGTAC | 1  | 1 | 4  | 1 | 1210 | 134.1 | 6.7  |       |        |       |        |       |        |       |        |
| V9HW55   | Proteasom     | MQLSKVKF | 7  | 2 | 4  | 2 | 269  | 30.2  | 6.99 | 260.2 | 296.6  | 189.1 | 259.1  | 262.2 | 247.5  | 244   | 211.7  |
| P03950   | Angiogenin    | MVMGLGV  | 13 | 2 | 6  | 2 | 147  | 16.5  | 9.64 | 404.3 | 446.7  | 333   | 406.2  | 389.5 | 423.6  | 441.8 | 422.6  |
| A0A0S2Z4 | Solute carr   | MAEDKSKF | 4  | 2 | 2  | 2 | 685  | 78.8  | 5.96 | 80.7  | 62.9   | 44.2  | 61.5   | 64    | 57.6   | 55.3  | 54.8   |
| Q03167   | Transformi    | MTSHYVIA | 2  | 1 | 3  | 1 | 851  | 93.4  | 5.71 | 97.9  | 80.6   | 58.7  | 84.1   | 80.2  | 93.4   | 88.1  | 66     |
| C9IY1    | Dermokine     | MLGITSCS | 4  | 1 | 2  | 1 | 253  | 26.7  | 9.09 |       |        |       |        |       |        |       |        |
| H7C215   | Reticulon-    | XVEEGAGC | 6  | 2 | 2  | 2 | 559  | 59.5  | 8.43 | 93.9  | 111    | 89.7  | 97.2   | 106.2 | 102.9  | 87    | 96.5   |
| P55107   | Growth/dif    | MAHVPAR  | 3  | 1 | 2  | 1 | 478  | 53.1  | 9.51 | 219.7 | 161.8  | 160.6 | 172.8  | 181.2 | 183.7  | 155   | 234.2  |
| P14784   | Interleukin   | MAAPALSV | 5  | 2 | 3  | 2 | 551  | 61.1  | 5.05 | 179.6 | 170.7  | 131.8 | 161.9  | 159.9 | 177.7  | 149.1 | 188.2  |
| V9HWH1   | Epididymis    | MEQLSSAN | 6  | 2 | 2  | 2 | 379  | 42.7  | 6.28 | 86.5  | 65.8   | 58.1  | 85.4   | 68.1  | 78.1   | 76.8  | 59.9   |
| O43405   | Cochlin OS    | MSAAWIPA | 2  | 1 | 6  | 1 | 550  | 59.4  | 7.96 | 346.4 | 511.1  | 275.7 | 415    | 442.1 | 351.6  | 386.2 | 452.5  |
| A0A1B0GV | Alpha-amir    | MWRLPRA  | 3  | 1 | 1  | 1 | 554  | 60    | 8.18 | 31    | 29.2   | 24.1  | 23.1   | 24.2  | 34.6   | 25.3  | 23.3   |
| F2RM35   | Serine prot   | MQRVNMI  | 2  | 1 | 2  | 1 | 461  | 51.7  | 5.39 |       |        |       |        |       |        |       |        |
| Q9NR34   | Mannosyl-     | MLMRKVP  | 3  | 2 | 2  | 2 | 630  | 70.9  | 7.46 |       |        |       |        |       |        |       |        |
| O00299   | Chloride in   | MAEEQPQ  | 11 | 2 | 9  | 2 | 241  | 26.9  | 5.17 | 104.1 | 95.7   | 71.5  | 94.6   | 102.6 | 87.8   | 80.7  | 80     |
| A0A024R9 | Mal, T-cell   | MSAGGAS  | 6  | 1 | 6  | 1 | 176  | 19.1  | 6.24 | 132   | 109.8  | 84.5  | 94     | 101.7 | 107.9  | 88.7  | 104    |
| P31150   | Rab GDP d     | MDEEYDVI | 4  | 2 | 7  | 1 | 447  | 50.6  | 5.14 | 114.8 | 83.7   | 86.9  | 103.1  | 99.2  | 109    | 78    | 91.8   |
| A0A024R3 | Laminin, b    | MELTSRER | 2  | 2 | 3  | 2 | 1798 | 195.9 | 6.52 | 134.8 | 142.9  | 111   | 114.4  | 122.6 | 150.8  | 107.1 | 122.5  |
| B2R7N9   | cDNA, FLJ9    | MGFLSPIY | 4  | 2 | 4  | 2 | 421  | 49.4  | 5.52 | 338.1 | 349.5  | 238.1 | 343.8  | 309.6 | 357.4  | 319.5 | 309.7  |
| P01704   | Immunogl      | MAWALLLI | 13 | 1 | 5  | 1 | 120  | 12.6  | 6.49 | 304.8 | 454.4  | 233   | 303.9  | 281.4 | 342.4  | 229.9 | 246.2  |
| Q8N126   | Cell adhesi   | MGAPAASI | 5  | 1 | 5  | 1 | 398  | 43.3  | 6.09 | 73.7  | 95.3   | 77.6  | 79.7   | 78.2  | 95.7   | 96.6  | 80.7   |
| A0A0X9V9 | IBM-B2 lig    | EIVMTQSP | 8  | 1 | 6  | 1 | 106  | 11.4  | 6.51 | 266.4 | 237.5  | 191.9 | 303.4  | 357.1 | 284.3  | 328.7 | 293.4  |
| Q9HBJ8   | Collectrin (  | MLWLLFFL | 6  | 1 | 7  | 1 | 222  | 25.2  | 5.63 | 109.6 | 79.1   | 82.2  | 100.7  | 125.9 | 115.8  | 83.4  | 94     |
| Q86UZ8   | FZD2 prote    | ARGVSGCS | 1  | 1 | 8  | 1 | 641  | 71.4  | 9    | 550.6 | 579.5  | 371.6 | 612.1  | 620.5 | 612.7  | 574.2 | 609.8  |
| H3BQD0   | Cerebellin    | MLGVLELL | 11 | 1 | 8  | 1 | 140  | 14.7  | 5.48 | 317.7 | 722.6  | 197   | 399.5  | 338.3 | 205.1  | 329.1 | 333    |
| Q96MU8   | Kremen pr     | MAPPAARI | 3  | 1 | 1  | 1 | 473  | 51.7  | 7.11 | 48.9  | 33.9   | 29.8  | 33.6   | 29    | 33.5   | 27.3  | 27.5   |
| P58546   | Myotrophin    | MCDKEFM  | 14 | 1 | 5  | 1 | 118  | 12.9  | 5.52 | 53.1  | 55.5   | 41.4  | 55.5   | 60.5  | 59.3   | 66.4  | 58.6   |

|          |             |          |    |   |    |   |      |       |       |       |        |       |        |        |        |        |       |
|----------|-------------|----------|----|---|----|---|------|-------|-------|-------|--------|-------|--------|--------|--------|--------|-------|
| P22304   | Iduronate   | MPPPRTGF | 2  | 1 | 5  | 1 | 550  | 61.8  | 5.45  | 142.9 | 111.3  | 112.3 | 119.5  | 122.3  | 122.3  | 114.7  | 123.9 |
| B3KNV8   | Polypeptid  | MVCTRKT  | 3  | 2 | 2  | 2 | 607  | 69.5  | 6.49  | 157.5 | 140.2  | 128.1 | 159.4  | 206.1  | 178    | 126.5  | 143.7 |
| O75787   | Renin rece  | MAVFFVLL | 5  | 2 | 5  | 2 | 350  | 39    | 6.1   | 973.9 | 474.6  | 387.6 | 490.8  | 579.7  | 599.7  | 413.1  | 450.3 |
| Q5T7S2   | Receptor p  | MEAAVAAL | 2  | 1 | 1  | 1 | 503  | 55.9  | 7.55  |       |        |       |        |        |        |        |       |
| O75071   | EF-hand ca  | MKKRKELN | 4  | 2 | 8  | 2 | 495  | 55    | 6.32  | 330.6 | 300.4  | 204.3 | 311.9  | 342.7  | 292.9  | 321.9  | 337.1 |
| D2JYI1   | TGF-beta r  | MGRGLLRG | 3  | 1 | 3  | 1 | 592  | 67.4  | 5.88  | 75.2  | 79.8   | 66    | 58     | 57.9   | 57.7   | 60.7   | 55.8  |
| P04118   | Colipase O  | MEKILLLL | 7  | 1 | 9  | 1 | 112  | 11.9  | 7.5   | 838.9 | 902.8  | 513.9 | 804.5  | 1277.9 | 865.7  | 738.1  | 777.9 |
| O43567   | E3 ubiquiti | MLLSIGML | 4  | 2 | 6  | 2 | 381  | 42.8  | 4.98  | 649.5 | 599.2  | 425.8 | 697.7  | 681.4  | 632.1  | 715.8  | 675   |
| A0A0G2JN | Mucin-6 O   | MVQRWLL  | 1  | 2 | 2  | 2 | 2439 | 256.9 | 7.39  |       |        |       |        |        |        |        |       |
| Q13790   | Apolipoproc | MTGLCGYS | 4  | 1 | 6  | 1 | 326  | 35.4  | 5.64  | 161   | 116.9  | 111   | 115    | 175.3  | 183    | 196.6  | 235.1 |
| Q9H9P2   | Chondrole   | MSRVVSL  | 11 | 2 | 2  | 2 | 273  | 30.4  | 6.83  | 13.6  | 10.7   | 10.2  | 9.1    | 12.1   | 13.9   | 13.3   | 15.2  |
| P08887   | Interleukin | MLAVGCAI | 3  | 1 | 2  | 1 | 468  | 51.5  | 8.22  | 65.3  | 66.6   | 55.5  | 67.5   | 58.2   | 74.7   | 61.2   | 57.9  |
| A0A024RA | Calpastatir | MSQPGQK  | 2  | 1 | 1  | 1 | 803  | 86.6  | 5.14  |       |        |       |        |        |        |        |       |
| Q6UWH4   | Protein FAI | MTCDPKPC | 2  | 1 | 2  | 1 | 519  | 57.5  | 9.7   | 323.8 | 311.7  | 325.3 | 464.7  | 424.6  | 365.6  | 310.8  | 373.9 |
| B2RDY9   | Adenylyl cy | MADMQNI  | 4  | 2 | 2  | 2 | 475  | 51.6  | 8.22  | 218   | 156.3  | 174.4 | 161.1  | 153.9  | 175.6  | 157.4  | 273.4 |
| A0A087X0 | Growth ho   | MNWGPTC  | 2  | 1 | 5  | 1 | 645  | 72.2  | 4.88  | 111.5 | 87.9   | 75    | 90.5   | 99.4   | 101.9  | 99     | 105.8 |
| P51606   | N-acylgluc  | MSKGLPAR | 3  | 1 | 2  | 1 | 427  | 48.8  | 6.37  | 88.6  | 67.2   | 88.8  | 73.3   | 70.8   | 73.7   | 51.2   | 55.8  |
| P27824   | Calnexin O  | MEGKWLL  | 4  | 2 | 3  | 2 | 592  | 67.5  | 4.6   | 30.4  | 34.9   | 38.5  | 26.9   | 26.2   | 31.8   | 29.9   | 29.3  |
| B2RAN2   | cDNA, FLJ9  | MTTQLPAY | 4  | 2 | 5  | 2 | 513  | 57    | 5.57  | 354.5 | 285.9  | 320.7 | 249.9  | 274.4  | 243.3  | 262.6  | 235.9 |
| Q9UGM5   | Fetuin-B O  | MGLLLPLA | 2  | 1 | 5  | 1 | 382  | 42    | 6.83  | 140   | 114.8  | 112.9 | 118.9  | 111.8  | 131.1  | 125.2  | 93.5  |
| B9EKV4   | Aldehyde c  | MFLRAGLA | 3  | 1 | 5  | 1 | 518  | 56.3  | 6.57  | 20.2  | 9.8    | 16.8  | 12.6   | 16.9   | 13.9   | 10.9   | 11.7  |
| P78310   | Coxsackiev  | MALLLCFV | 3  | 1 | 1  | 1 | 365  | 40    | 7.56  | 47.1  | 37.6   | 35.6  | 40     | 38.2   | 27.4   | 31.1   | 31.6  |
| O75074   | Low-densit  | MEKRAAAC | 2  | 1 | 3  | 1 | 770  | 82.8  | 6.21  | 189.3 | 150.2  | 159.1 | 185.1  | 210.7  | 203.7  | 194.8  | 218.8 |
| Q0VDC6   | Peptidylpr  | MGRQRAE  | 10 | 1 | 1  | 1 | 145  | 15.7  | 9.17  | 35.3  | 33.8   | 40.5  | 34.5   | 35     | 37.7   | 38.2   | 33.7  |
| A8K5Y2   | cDNA FLJ7   | MADIKTGI | 1  | 1 | 4  | 1 | 695  | 76.2  | 4.64  | 405.2 | 432    | 309.4 | 414.4  | 409.5  | 361.2  | 330.4  | 420.4 |
| Q96FE5   | Leucine-ric | MQVSKRM  | 2  | 1 | 17 | 1 | 620  | 69.8  | 8.56  | 521.7 | 476.9  | 443.6 | 523.5  | 515    | 537.2  | 379.8  | 587.4 |
| Q96MG2   | Junctional  | MSMTTRA  | 6  | 2 | 4  | 2 | 331  | 36.3  | 9.38  | 258.5 | 272.2  | 176.9 | 234.6  | 310.4  | 225    | 192.1  | 262.2 |
| A8K9U9   | cDNA FLJ7   | MATLVVNI | 2  | 1 | 4  | 1 | 574  | 64    | 6.43  |       |        |       |        |        |        |        |       |
| D6W5K2   | Thymosin,   | GVSSRFPE | 8  | 2 | 7  | 2 | 169  | 17.9  | 10.48 | 1247  | 1089.4 | 536.4 | 1030.5 | 1004.3 | 1341.3 | 1170.9 | 878.5 |
| A0A0B5HR | Serine/thre | MVDGVMI  | 4  | 1 | 2  | 1 | 509  | 57.1  | 7.33  | 117.6 | 109.8  | 106.5 | 123.8  | 133    | 114.8  | 113.3  | 128.2 |
| Q9NWW4   | UPF0587 p   | MGKIALQL | 16 | 2 | 3  | 2 | 160  | 18    | 5.01  | 259.2 | 373.2  | 182.5 | 221.3  | 246.3  | 177.1  | 199.5  | 206.9 |
| P02545   | Prelamin-A  | METPSQRF | 2  | 1 | 1  | 1 | 664  | 74.1  | 7.02  | 173.5 | 98.4   | 115.4 | 86     | 73     | 89.4   | 66.8   | 64.1  |
| A4D2P0   | Ras-relatec | MQAIKCV  | 10 | 2 | 3  | 2 | 211  | 23.5  | 8.63  | 84.6  | 71     | 71.3  | 84.1   | 105.5  | 82.4   | 93.3   | 78.2  |
| Q86YT9   | Junctional  | MFCPLKLI | 5  | 2 | 3  | 2 | 394  | 44.3  | 7.12  | 124.7 | 180    | 88.4  | 138.5  | 122.5  | 103.1  | 101.5  | 101.9 |
| P15529   | Membrane    | MEPPGRRF | 4  | 1 | 4  | 1 | 392  | 43.7  | 6.74  | 35.9  | 45.1   | 31.2  | 44.7   | 39.4   | 33.8   | 35.4   | 40.8  |
| Q9BYE4   | Small proli | MSYQQQC  | 18 | 1 | 2  | 1 | 73   | 8.2   | 7.96  | 225.5 | 254.8  | 318.1 | 255.2  | 243.8  | 263.5  | 244.6  | 217.1 |
| H7BZJ3   | Protein dis | SDVLELTD | 11 | 1 | 2  | 1 | 123  | 13.5  | 7.3   |       |        |       |        |        |        |        |       |
| B2RC95   | cDNA, FLJ9  | MAEEEAPK | 2  | 1 | 7  | 1 | 647  | 71.1  | 7.99  | 144.5 | 134.2  | 114.9 | 142.2  | 146.9  | 130    | 120.5  | 122.9 |
| Q9BYJ0   | Fibroblast  | MKFVPCLL | 5  | 1 | 1  | 1 | 223  | 24.6  | 8.87  | 58    | 64     | 38.3  | 57.8   | 70.6   | 49.3   | 57.2   | 64.1  |
| Q96PC5   | Melanoma    | MAKFGVHI | 1  | 2 | 3  | 2 | 1412 | 159.7 | 4.69  | 112.2 | 94.7   | 98.6  | 106.7  | 106.4  | 110.9  | 102.6  | 116.3 |
| Q9UMX5   | Neudesin C  | MVGPAPRI | 5  | 1 | 10 | 1 | 172  | 18.8  | 5.69  | 229.2 | 209.7  | 167.5 | 226.5  | 244.1  | 222.8  | 206.9  | 235.1 |

|          |              |          |    |   |    |   |      |       |      |       |        |       |       |       |       |       |       |
|----------|--------------|----------|----|---|----|---|------|-------|------|-------|--------|-------|-------|-------|-------|-------|-------|
| Q9Y4I9   | Tyrosine p   | MGPPLPLL | 1  | 1 | 2  | 1 | 986  | 108   | 5.91 | 155.4 | 147.2  | 121.1 | 139.4 | 156.3 | 131.5 | 109   | 150.1 |
| P11234   | Ras-relatec  | MAANKSKC | 7  | 1 | 2  | 1 | 206  | 23.4  | 6.62 | 29.3  | 22.5   | 20.2  | 20.2  | 25.2  | 39.8  | 17.4  | 19.1  |
| Q16581   | C3a anaph    | MASFSAET | 3  | 1 | 1  | 1 | 482  | 53.8  | 6.67 | 70.9  | 63.9   | 67.8  | 64.7  | 70.1  | 65.3  | 63.1  | 63.4  |
| B2R6S5   | UMP-CMP      | MLSRCRSG | 4  | 1 | 6  | 1 | 228  | 25.8  | 7.97 | 406.5 | 384.8  | 240.2 | 339.2 | 404   | 438.8 | 308.5 | 319.9 |
| A0A1B1RV | Lipoprotei   | MESKALLV | 6  | 2 | 2  | 2 | 475  | 53.1  | 8.15 | 80.3  | 60.9   | 70.8  | 74.6  | 80.2  | 69.5  | 64.4  | 56.3  |
| Q59ED5   | Tetraspani   | PFSVVDAR | 5  | 1 | 2  | 1 | 285  | 31.7  | 8.37 | 62.9  | 84.1   | 55.4  | 67.3  | 65.1  | 51.7  | 63.2  | 67.4  |
| A8K139   | cDNA FLJ7    | MVVALRYV | 2  | 2 | 5  | 2 | 1257 | 139.9 | 6.24 | 96.3  | 73.4   | 67.1  | 72.2  | 85.9  | 68.7  | 69    | 68    |
| G3V5Z7   | Proteasom    | MSRGSSAG | 8  | 2 | 2  | 2 | 252  | 28.1  | 6.76 | 170.1 | 150.6  | 125.1 | 142.8 | 125.9 | 146.2 | 113.5 | 106.8 |
| Q8NFU3   | Thiosulfate  | MAGAPTVS | 8  | 1 | 1  | 1 | 115  | 12.5  | 6.07 |       |        |       |       |       |       |       |       |
| P32241   | Vasoactive   | MRPPSPLP | 3  | 1 | 1  | 1 | 457  | 51.5  | 8.18 | 40.8  | 43     | 32.2  | 42.1  | 34.4  | 35    | 35.3  | 35.1  |
| Q8IYJ0   | PILR alpha   | MESRMWF  | 2  | 1 | 3  | 1 | 282  | 30.1  | 9.1  | 128.5 | 124.5  | 84.4  | 124.2 | 117.3 | 122.3 | 89.9  | 120.9 |
| A0A075B6 | Protein IG   | MDMRVPA  | 14 | 1 | 2  | 1 | 117  | 12.7  | 9.25 | 36.2  | 41.8   | 32.6  | 23.3  | 32    | 39.4  | 25.9  | 20.1  |
| A0A087WV | Tumor pro    | MDSAGQD  | 4  | 1 | 4  | 1 | 222  | 23.8  | 6.55 | 266   | 228.2  | 169.7 | 242.9 | 214.3 | 266.8 | 244.4 | 215.4 |
| Q03164   | Histone-lys  | MAHSCRW  | 0  | 1 | 10 | 1 | 3969 | 431.5 | 9.09 | 472.5 | 2094.7 | 378.3 | 540   | 729.5 | 922.7 | 521.2 | 606.1 |
| P13639   | Elongation   | MVNFTVD  | 2  | 1 | 1  | 1 | 858  | 95.3  | 6.83 |       |        |       |       |       |       |       |       |
| O95502   | Neuronal p   | MKFLAVLL | 2  | 2 | 2  | 2 | 500  | 52.8  | 6.21 |       |        |       |       |       |       |       |       |
| X5D2G8   | Fibroblast   | MGAPACA  | 2  | 2 | 3  | 2 | 807  | 87.8  | 5.9  | 316.4 | 228.2  | 256.8 | 255.9 | 249.8 | 294.5 | 206.5 | 237.9 |
| A0A024R3 | Eukaryotic   | MGFGDLKS | 7  | 1 | 1  | 1 | 225  | 24.7  | 4.67 |       |        |       |       |       |       |       |       |
| Q8WY15   | Sodium/glu   | MEEHTEAC | 2  | 1 | 1  | 1 | 698  | 75.6  | 7.46 |       |        |       |       |       |       |       |       |
| C5IX07   | Tumor-ass    | MARGPGL  | 4  | 1 | 1  | 1 | 323  | 35.7  | 8.87 | 130.5 | 115.3  | 103.3 | 129.5 | 127.1 | 125.5 | 120.7 | 127.5 |
| Q9H2A7   | C-X-C moti   | MGRDLRPC | 6  | 1 | 1  | 1 | 254  | 27.6  | 8.78 |       |        |       |       |       |       |       |       |
| A0A075B7 | Protein IG   | MDWTWR   | 16 | 2 | 3  | 1 | 117  | 13    | 9.13 |       |        |       |       |       |       |       |       |
| I3L0A0   | HCG20447     | MAGAENW  | 5  | 2 | 7  | 2 | 370  | 42.2  | 6.71 | 377.8 | 175.7  | 137.8 | 193   | 212.5 | 188.3 | 177.6 | 148.5 |
| Q7L5L3   | Glyceroph    | MSLLLYAI | 4  | 1 | 1  | 1 | 318  | 36.6  | 7.97 | 18.2  | 12.9   | 10.4  | 9.7   | 12.6  | 16.3  | 15.3  | 11.7  |
| Q9GZP0   | Platelet-de  | MHRLIFVY | 2  | 1 | 3  | 1 | 370  | 42.8  | 7.97 |       |        |       |       |       |       |       |       |
| A8K061   | cDNA FLJ7    | MFTIKLLF | 2  | 1 | 3  | 1 | 460  | 53.6  | 6.6  | 64.3  | 67.7   | 76.5  | 67    | 89.8  | 81.7  | 73.2  | 74.5  |
| O00622   | Protein CY   | MSSRIARA | 3  | 1 | 1  | 1 | 381  | 42    | 8.21 | 41.8  | 41     | 33.5  | 39.3  | 44.8  | 42.5  | 38    | 39.4  |
| A0A1K0FU | Globin E1 (  | MLSAQERA | 11 | 1 | 1  | 1 | 141  | 15.6  | 6.62 | 18.4  | 13.1   | 13.3  | 9.4   | 11    | 19    | 11.2  | 7.8   |
| P10721   | Mast/stem    | MRGARGA  | 1  | 1 | 1  | 1 | 976  | 109.8 | 6.98 | 59    | 57.5   | 50.6  | 62    | 59.2  | 53.7  | 51.9  | 56.5  |
| Q9ULK6   | RING finge   | MAMSLIQ  | 2  | 1 | 11 | 1 | 438  | 48    | 5.27 | 261.6 | 235    | 217   | 266.4 | 292.7 | 242.5 | 220.3 | 263.9 |
| Q8NG20   | Plasminoge   | MSEGNSDC | 14 | 2 | 6  | 2 | 90   | 9.8   | 7.14 | 122.3 | 103.2  | 93.3  | 119.2 | 128.8 | 136.6 | 211.5 | 180.8 |
| Q8N2G4   | Ly6/PLAUR    | MWVLGIA  | 9  | 1 | 1  | 1 | 141  | 15.2  | 8.02 |       |        |       |       |       |       |       |       |
| A0A0G2JH | Myelin-olig  | MASLSRPS | 4  | 1 | 2  | 1 | 295  | 33.5  | 9.14 | 99.9  | 90.3   | 80.3  | 99.6  | 104.5 | 91.2  | 80.9  | 99.1  |
| Q53Y06   | ATPase, H+   | MALSDADV | 4  | 1 | 4  | 1 | 226  | 26.1  | 8    | 222.5 | 215.2  | 198.8 | 192.5 | 212.5 | 224.7 | 172.8 | 145.2 |
| B5TMG5   | Histidine ri | MGHHRPV  | 1  | 1 | 5  | 1 | 750  | 86.2  | 4.75 | 603   | 401.1  | 373.4 | 572.2 | 635.3 | 520.7 | 435.4 | 636.8 |
| B7Z6S9   | Glucosylce   | MSDRLFSN | 1  | 1 | 4  | 1 | 621  | 68.7  | 7.94 | 122.6 | 87.3   | 87.1  | 96    | 128   | 102.8 | 80.7  | 86.2  |
| Q9H6Y7   | E3 ubiquiti  | MHPAAFPI | 3  | 1 | 3  | 1 | 350  | 38.3  | 5.63 | 101.6 | 68.8   | 62.8  | 85    | 78.9  | 83.8  | 78.9  | 93.1  |
| Q6ZSJ9   | Protein shi  | MALRLLLL | 2  | 1 | 2  | 1 | 500  | 55.7  | 9.35 | 116.6 | 120    | 86.5  | 107.4 | 104.5 | 123   | 91.1  | 109.9 |
| G9FP35   | Guanine nu   | MTLESIMA | 3  | 1 | 5  | 1 | 359  | 42.1  | 5.68 | 134.5 | 134.8  | 103.7 | 151   | 151.6 | 153.1 | 124.5 | 122.5 |
| O14786   | Neuropilin   | MERGLPLL | 2  | 1 | 4  | 1 | 923  | 103.1 | 5.88 | 17    | 13.9   | 10.9  | 9.3   | 8.1   | 13.4  | 12.5  | 11.3  |
| Q7L9L4   | MOB kinas    | MSFLFGSR | 5  | 1 | 1  | 1 | 216  | 25.1  | 6.73 | 20.6  | 9.6    | 11.8  | 11.5  | 18.8  | 15.3  | 12    | 10.2  |



|           |              |           |    |   |   |   |      |       |       |       |       |       |        |        |        |        |       |
|-----------|--------------|-----------|----|---|---|---|------|-------|-------|-------|-------|-------|--------|--------|--------|--------|-------|
| Q59FM9    | TYRO3 pro    | RRRPRPEA  | 2  | 1 | 3 | 1 | 951  | 102.8 | 6.42  |       |       |       |        |        |        |        |       |
| B2RB70    | Neurocalci   | MGKQNSK   | 8  | 2 | 2 | 2 | 193  | 22.2  | 5.35  | 193.8 | 147.6 | 126.8 | 158.4  | 186.1  | 177.7  | 138.9  | 155   |
| A0A024R2  | Tyrosine-p   | MSSWIRW   | 2  | 1 | 2 | 1 | 838  | 93.8  | 6.57  | 24.4  | 28.1  | 13.5  | 27.7   | 22.5   | 22.9   | 22.5   | 25.5  |
| Q53TN4    | Cytochrom    | MAMEGYV   | 3  | 1 | 1 | 1 | 286  | 31.6  | 8.76  | 212.3 | 168.5 | 174.6 | 222    | 237.1  | 180.6  | 148.3  | 186.2 |
| Q15043    | Zinc transp  | MKLLLLHP  | 2  | 1 | 3 | 1 | 492  | 54.2  | 5.33  | 163.4 | 128.1 | 122.7 | 168    | 153    | 257.6  | 128.8  | 133   |
| Q08708    | CMRF35-lii   | MTARAWA   | 4  | 1 | 8 | 1 | 224  | 24.8  | 9.25  | 433.4 | 357.3 | 289.4 | 479.1  | 520.1  | 507.8  | 424.8  | 425.2 |
| A0A0B4J1S | High affinit | MDGEATV   | 1  | 1 | 3 | 1 | 577  | 62.1  | 9.47  | 321.4 | 269   | 236   | 340.9  | 291.6  | 368.7  | 347.6  | 380.5 |
| PODKV0    | Spermatog    | MENLPFPL  | 2  | 1 | 7 | 1 | 1188 | 130.4 | 9.42  | 605.1 | 512.5 | 762.5 | 501.2  | 473    | 581.2  | 639.1  | 633.5 |
| A0A087X1I | Serpin B6 (  | MSSRQRGI  | 5  | 1 | 1 | 1 | 395  | 44.8  | 5.68  | 63.8  | 65.1  | 50    | 56.8   | 64.3   | 59.2   | 57.3   | 59.1  |
| V9GYJ8    | Apolipoproc  | MGTRLLPA  | 13 | 1 | 1 | 1 | 87   | 9.6   | 4.53  |       |       |       |        |        |        |        |       |
| Q7Z7G8    | Vacuolar p   | MLESYVTP  | 0  | 1 | 4 | 1 | 4022 | 448.4 | 6.46  | 192.1 | 268   | 132.2 | 204.4  | 219.2  | 153.4  | 185.6  | 184   |
| A0A0X9US  | MS-D2 ligh   | DIVMTQSP  | 17 | 1 | 2 | 1 | 107  | 11.4  | 7.96  |       |       |       |        |        |        |        |       |
| A8K9D8    | cDNA FLJ7    | MATVRASL  | 1  | 1 | 2 | 1 | 971  | 106.4 | 6.68  | 103.8 | 78.4  | 76.9  | 75     | 75.2   | 77.5   | 73.2   | 79.3  |
| A0A087W1  | Protein sid  | MARGARP   | 1  | 1 | 1 | 1 | 2213 | 241.9 | 6.49  |       |       |       |        |        |        |        |       |
| P61457    | Pterin-4-al  | MAGKAHR   | 10 | 1 | 4 | 1 | 104  | 12    | 6.8   | 247.2 | 161.1 | 146.9 | 164.6  | 199    | 176.3  | 161.5  | 182.4 |
| P80511    | Protein S1   | MTKLEEHL  | 8  | 1 | 5 | 1 | 92   | 10.6  | 6.25  | 1210  | 875.6 | 607.9 | 1073.4 | 1010.6 | 1011.6 | 1638.1 | 750.5 |
| Q8WWQ8    | Stabilin-2 ( | MMLQHLV   | 0  | 1 | 1 | 1 | 2551 | 276.8 | 6.4   | 26.1  | 15.4  | 19.7  | 16     | 21.3   | 17.4   | 17     | 11.6  |
| A0A087WS  | Nucleobinc   | MRWRTILL  | 2  | 1 | 2 | 1 | 420  | 50.2  | 5.12  | 86.5  | 56.8  | 43.7  | 72.2   | 64.8   | 62.8   | 53.6   | 49.3  |
| A0A125U0  | MS-C3 ligh   | DIQMTQSF  | 17 | 1 | 1 | 1 | 106  | 11.4  | 4.83  | 117.6 | 79.2  | 155.7 | 107.3  | 114.3  | 84.8   | 93     | 98.8  |
| Q6UW88    | Epigen OS-   | MALGVPIS  | 8  | 1 | 1 | 1 | 154  | 17.1  | 6.95  | 84.1  | 51.8  | 54.8  | 63.1   | 64.6   | 60.6   | 54.9   | 50.2  |
| P09382    | Galectin-1   | MACGLVAS  | 9  | 1 | 2 | 1 | 135  | 14.7  | 5.5   | 78.6  | 83.7  | 69.6  | 86     | 77.4   | 71.7   | 53.6   | 68.1  |
| P62070    | Ras-relatec  | MAAAGWF   | 6  | 1 | 1 | 1 | 204  | 23.4  | 6.01  | 83    | 54.3  | 65.6  | 75.1   | 77.2   | 81.2   | 54.4   | 61.1  |
| B2RCC8    | cDNA, FLJ9   | MFLWLFLII | 2  | 1 | 1 | 1 | 837  | 94.4  | 7.97  | 34.1  | 21.8  | 17.4  | 21     | 22.2   | 30.9   | 18.9   | 17.6  |
| Q96RZ2    | N-acetylgli  | MAAGLARI  | 3  | 1 | 2 | 1 | 331  | 36.8  | 6.79  | 63.6  | 47.3  | 40.9  | 49     | 66.4   | 53     | 47.9   | 59.5  |
| P01127    | Platelet-de  | MNRCWAL   | 5  | 1 | 1 | 1 | 241  | 27.3  | 9.16  | 74.1  | 50.8  | 50.1  | 53.7   | 54.8   | 62.9   | 49.5   | 56.2  |
| A0A0C4DH  | Protein IGH  | MVSPQLFL  | 10 | 1 | 1 | 1 | 115  | 12.6  | 7.12  | 185.7 | 152.5 | 136.9 | 154.5  | 154.7  | 161    | 193.7  | 163.8 |
| B2R9K8    | cDNA, FLJ9   | MAAVKTLN  | 2  | 1 | 1 | 1 | 531  | 57.9  | 6.8   | 45.5  | 22.9  | 21.2  | 23.8   | 29     | 38.9   | 27.8   | 17.3  |
| Q9Y6U3    | Adseverin    | MARELYHE  | 1  | 1 | 3 | 1 | 715  | 80.4  | 5.71  | 92.6  | 92.8  | 64    | 79.2   | 73     | 84.9   | 85.4   | 70.8  |
| O43493    | Trans-Golg   | MRFVVALV  | 2  | 1 | 1 | 1 | 480  | 51.1  | 5.73  | 163   | 121.1 | 104.1 | 144.2  | 141.3  | 178.1  | 128.6  | 164.8 |
| Q9HCM3    | UPF0606 p    | MPGARRR   | 1  | 1 | 1 | 1 | 1950 | 210.6 | 6.11  | 26.1  | 16.9  | 15.7  | 19.2   | 21.6   | 21.3   | 18.8   | 22.7  |
| P13521    | Secretogra   | MAEAKTHV  | 2  | 1 | 2 | 1 | 617  | 70.9  | 4.75  | 186.6 | 232.1 | 131.2 | 217.4  | 159.4  | 226.3  | 149.7  | 132.3 |
| P16234    | Platelet-de  | MGTSHPAI  | 2  | 1 | 2 | 1 | 1089 | 122.6 | 5.17  | 33.2  | 26    | 30.5  | 26.2   | 29.4   | 22.1   | 27.9   | 29.7  |
| Q96AX9    | E3 ubiquiti  | MGWKPSE   | 1  | 1 | 4 | 1 | 1013 | 109.9 | 8.44  | 84.1  | 28.5  | 30.2  | 59.4   | 52.6   | 78     | 45.5   | 88.1  |
| Q86YD5    | Low-densit   | MWLLGPLC  | 5  | 1 | 1 | 1 | 345  | 37.4  | 4.87  | 14.4  | 17.7  | 9.9   | 16.5   | 11.8   | 14.2   | 11.6   | 10.8  |
| A6NL88    | Protein shi  | MPALLLVV  | 2  | 1 | 1 | 1 | 538  | 56.2  | 10.02 | 80    | 57    | 133   | 76.5   | 74.3   | 73.3   | 62.3   | 75.4  |
| E5RIM7    | Copper tra   | MKAESPGK  | 23 | 1 | 1 | 1 | 73   | 7.9   | 7.24  | 31.9  | 34.8  | 32.1  | 25.7   | 27.2   | 34.5   | 35     | 29.3  |
| Q9NQ79    | Cartilage a  | MAPSADPC  | 2  | 1 | 1 | 1 | 661  | 71.4  | 5.12  | 91.6  | 71.7  | 85    | 85.4   | 74.4   | 96     | 73.4   | 82.3  |
| O94991    | SLIT and N   | MHTCCPPV  | 1  | 1 | 4 | 1 | 958  | 107.4 | 6.95  | 135.1 | 156.6 | 100.1 | 122.8  | 109.4  | 155.5  | 94.3   | 98.7  |
| B4DZM1    | cDNA FLJ5    | MTKLPDDF  | 2  | 1 | 3 | 1 | 872  | 100.5 | 5.02  | 243   | 208.8 | 295.4 | 222.6  | 225.1  | 244.1  | 219.2  | 261.6 |
| B7Z6Z4    | Myosin ligh  | MVGPRSW   | 3  | 1 | 1 | 1 | 238  | 26.7  | 5.08  | 80.6  | 56.1  | 37.9  | 54.2   | 63.5   | 67.3   | 69.6   | 66.5  |
| O14494    | Phospholip   | MFDKTRLP  | 4  | 1 | 1 | 1 | 284  | 32.1  | 7.97  | 196.6 | 151.5 | 147.6 | 149.9  | 176.9  | 126.3  | 151.3  | 152.4 |

|          |               |           |    |   |    |   |      |       |      |       |       |       |       |       |       |       |       |  |
|----------|---------------|-----------|----|---|----|---|------|-------|------|-------|-------|-------|-------|-------|-------|-------|-------|--|
| Q8N386   | Leucine-ric   | MGGTLAW   | 3  | 1 | 4  | 1 | 305  | 33.2  | 5.05 |       |       |       |       |       |       |       |       |  |
| Q9UHY7   | Enolase-ph    | MVVLSPA   | 5  | 1 | 1  | 1 | 261  | 28.9  | 4.78 | 17.8  | 13.5  | 11    | 10.6  | 11.3  | 13.5  | 10.1  | 11.8  |  |
| P17927   | Compleme      | MGASSPRS  | 1  | 1 | 2  | 1 | 2039 | 223.5 | 6.95 | 52    | 53.3  | 36.8  | 37.4  | 47.2  | 55.1  | 35.7  | 48.3  |  |
| P29317   | Ephrin typ    | MELQAAR   | 1  | 1 | 1  | 1 | 976  | 108.2 | 6.23 |       |       |       |       |       |       |       |       |  |
| Q96S16   | JmjC doma     | MVTGGAH   | 3  | 1 | 1  | 1 | 334  | 36.8  | 9.72 |       |       |       |       |       |       |       |       |  |
| P56159   | GDNF fami     | MFLATLYF  | 3  | 1 | 1  | 1 | 465  | 51.4  | 7.91 | 412.4 | 328.2 | 386.6 | 351.5 | 317.1 | 499   | 312.1 | 334.3 |  |
| Q9Y490   | Talin-1 OS    | MVALSLKIS | 0  | 1 | 1  | 1 | 2541 | 269.6 | 6.07 | 49.7  | 55.6  | 32.6  | 40.9  | 45.8  | 57.4  | 49.1  | 46.5  |  |
| Q59GD9   | Myelin ass    | RSRGAEAT  | 2  | 1 | 1  | 1 | 661  | 72.7  | 5.16 |       |       |       |       |       |       |       |       |  |
| A0A024R6 | Galactosyl    | MAEWLLS   | 1  | 1 | 2  | 1 | 685  | 77    | 6.64 | 99.9  | 78.5  | 61.6  | 82.6  | 77.4  | 78.2  | 78.9  | 63.7  |  |
| A0A024R1 | Parvalbum     | MSMTDLLI  | 12 | 1 | 1  | 1 | 110  | 12.1  | 5.19 |       |       |       |       |       |       |       |       |  |
| A0A024RB | Solute carr   | MMGSPVS   | 2  | 1 | 2  | 1 | 540  | 56.4  | 6.83 | 103.6 | 57.4  | 45    | 58.4  | 77    | 79.3  | 42.8  | 65.3  |  |
| Q5T7Y6   | Protein S1    | MEEPQTKT  | 10 | 1 | 1  | 1 | 147  | 15.9  | 4.48 |       |       |       |       |       |       |       |       |  |
| Q59EU6   | EF hand dc    | CEERAARQ  | 4  | 1 | 1  | 1 | 265  | 29.8  | 6.21 | 22.4  | 12.7  | 13.6  | 12.2  | 18.2  | 17.3  | 13.4  | 10.2  |  |
| Q7Z4W1   | L-xylulose    | MELFLAGR  | 4  | 1 | 3  | 1 | 244  | 25.9  | 8.1  | 245.2 | 167.9 | 190.3 | 178.1 | 206.6 | 172.8 | 148.9 | 161   |  |
| Q6I929   | HCG19786      | MDGTRTSL  | 5  | 1 | 1  | 1 | 246  | 28.4  | 8.21 | 34.1  | 22.8  | 32    | 28.4  | 29.2  | 25.4  | 25.8  | 27.4  |  |
| A0A0F7RQ | Follicle stir | MKTLQFFF  | 6  | 1 | 6  | 1 | 129  | 14.7  | 7.06 | 306.7 | 243.5 | 193.2 | 218.8 | 312.8 | 311   | 291.6 | 303.2 |  |
| V9HWJ1   | Glutathion    | MATNWGS   | 2  | 1 | 2  | 1 | 474  | 52.4  | 5.92 |       |       |       |       |       |       |       |       |  |
| S4R347   | Formin-bin    | MSWGTEL   | 2  | 1 | 1  | 1 | 609  | 70.5  | 6.64 |       |       |       |       |       |       |       |       |  |
| A0A1B0GU | Uncharact     | MYGDIFNA  | 13 | 1 | 1  | 1 | 103  | 10.9  | 8.92 | 25.5  | 14.2  | 22.1  | 17.1  | 16.8  | 23.3  | 22.6  | 27.8  |  |
| A0A087WU | Protein SYI   | MNGRVDY   | 6  | 1 | 1  | 1 | 186  | 20.8  | 5.19 |       |       |       |       |       |       |       |       |  |
| Q9H741   | UPF0454 p     | MVNLAAM   | 6  | 1 | 1  | 1 | 205  | 23.6  | 8.1  | 30.5  | 34.9  | 27.2  | 29.7  | 28    | 26.2  | 23.4  | 29.4  |  |
| P30101   | Protein dis   | MRLRRLAL  | 2  | 1 | 2  | 1 | 505  | 56.7  | 6.35 | 45.8  | 50    | 38.6  | 41.1  | 37.8  | 48.8  | 39.5  | 33    |  |
| P22692   | Insulin-like  | MLPLCLVA  | 5  | 1 | 2  | 1 | 258  | 27.9  | 7.15 | 149.9 | 148.4 | 158.8 | 128.6 | 133.5 | 145.8 | 128.8 | 130.8 |  |
| Q9H0X4   | Protein FAI   | MLDHKDLF  | 2  | 1 | 2  | 1 | 552  | 59.6  | 6.28 | 61.4  | 44.4  | 48.8  | 50.7  | 53.1  | 49.7  | 37    | 42.8  |  |
| Q6ZMU0   | Delta-amin    | MPPTSSTP  | 3  | 1 | 2  | 1 | 359  | 39    | 7.65 |       |       |       |       |       |       |       |       |  |
| Q8TBD0   | Uncharact     | RTQHCSST  | 8  | 1 | 1  | 1 | 132  | 14    | 7.9  | 84.6  | 76.7  | 96    | 96.2  | 84.9  | 80.6  | 110.1 | 77.9  |  |
| X6R7Y7   | Intraflagell  | MRKIDLCL  | 5  | 1 | 1  | 1 | 214  | 24.3  | 8.1  | 34.8  | 34.4  | 22.2  | 36    | 28    | 31.7  | 30.1  | 26.7  |  |
| B4DU44   | Involucrin    | MSQQHTLI  | 2  | 1 | 1  | 1 | 595  | 69.6  | 4.6  | 43.4  | 25.7  | 34.3  | 28.3  | 30.1  | 26.8  | 39.5  | 29.9  |  |
| Q8TER0   | Sushi, nido   | MRHGVAW   | 1  | 1 | 1  | 1 | 1413 | 152.1 | 6.98 |       |       |       |       |       |       |       |       |  |
| Q9Y3R5   | Protein do    | MDPEEQEI  | 0  | 1 | 1  | 1 | 2298 | 258.1 | 6.29 | 33.4  | 52.7  | 33.8  | 23.2  | 25.8  | 24.2  | 17.6  | 18.7  |  |
| B2R8C2   | Tyrosine-p    | MSNICQRL  | 2  | 1 | 1  | 1 | 505  | 58.3  | 6.8  |       |       |       |       |       |       |       |       |  |
| P09543   | 2',3'-cyclic  | MNRGFSRI  | 3  | 1 | 1  | 1 | 421  | 47.5  | 9.07 |       |       |       |       |       |       |       |       |  |
| A0A024QZ | NAD(P)H d     | MAGKKVLI  | 4  | 1 | 1  | 1 | 231  | 25.9  | 6.29 | 99.8  | 61.1  | 137.6 | 84.7  | 91.9  | 87.9  | 77.4  | 66.2  |  |
| P51159   | Ras-relate    | MSDGDYD   | 4  | 1 | 2  | 1 | 221  | 24.9  | 5.22 | 207.2 | 259.3 | 193.5 | 185.5 | 183   | 126.7 | 123.1 | 190.9 |  |
| P55010   | Eukaryotic    | MSVNVNR   | 2  | 1 | 4  | 1 | 431  | 49.2  | 5.58 | 330.4 | 250.3 | 242.2 | 292.2 | 297.8 | 333.6 | 296.7 | 346.4 |  |
| P48509   | CD151 anti    | MGEFNEKH  | 4  | 1 | 2  | 1 | 253  | 28.3  | 7.47 | 43.6  | 32.2  | 27.4  | 33.7  | 34.8  | 40.1  | 27.9  | 30.4  |  |
| P18085   | ADP-ribosy    | MGLTISSLF | 6  | 1 | 1  | 1 | 180  | 20.5  | 7.14 | 36.6  | 24.6  | 32.1  | 20.4  | 23.7  | 18.6  | 18.6  | 20.6  |  |
| Q53H88   | Dynactin 2    | MADPKYAI  | 2  | 1 | 4  | 1 | 406  | 44.8  | 5.12 | 92.2  | 90.7  | 67.6  | 89.7  | 97.4  | 83.6  | 99.5  | 101.2 |  |
| A8K8U1   | cDNA FLJ7     | MASASYHI  | 1  | 1 | 1  | 1 | 1230 | 136.2 | 5.83 | 36.4  | 29.7  | 24.4  | 26.6  | 34.4  | 30.3  | 28.7  | 26    |  |
| B3KR33   | cDNA FLJ3     | MNPIVVVF  | 3  | 1 | 1  | 1 | 308  | 32.1  | 6.1  | 195.3 | 159.1 | 118.3 | 162.6 | 152.5 | 146.7 | 135.4 | 155.8 |  |
| P54826   | Growth arr    | MVAALLGC  | 3  | 1 | 10 | 1 | 345  | 35.7  | 5.55 | 955.2 | 877.9 | 660.9 | 943.3 | 941.9 | 946.1 | 817.2 | 887   |  |

|           |               |           |    |   |   |   |      |       |       |       |       |       |       |       |       |       |       |
|-----------|---------------|-----------|----|---|---|---|------|-------|-------|-------|-------|-------|-------|-------|-------|-------|-------|
| B4DWA6    | cdNA FLJ6     | MGGPQDK   | 3  | 1 | 2 | 1 | 335  | 37.5  | 6.14  | 188.6 | 155.8 | 147.6 | 140.3 | 151.8 | 157   | 157.1 | 153.1 |
| D6W551    | Chromoso      | MKTSAEHL  | 2  | 1 | 1 | 1 | 284  | 30.3  | 8.38  | 62.1  | 49.9  | 45.2  | 56.3  | 53.7  | 93.7  | 61.1  | 73.6  |
| A0A140VJJ | S-formylgl    | MALKQISSI | 6  | 1 | 1 | 1 | 282  | 31.4  | 7.02  |       |       |       |       |       |       |       |       |
| A0A024R3  | Sodium ch     | MPAFNRLF  | 4  | 1 | 3 | 1 | 215  | 24.7  | 4.68  | 169   | 131.3 | 121.3 | 136   | 165.8 | 129.4 | 130.2 | 167.9 |
| A0A0A7E7  | Endoplasm     | MVFLPLKV  | 1  | 1 | 1 | 1 | 941  | 107.2 | 6.4   |       |       |       |       |       |       |       |       |
| O95861    | 3'(2'),5'-bis | MASSNTVL  | 3  | 1 | 1 | 1 | 308  | 33.4  | 5.69  | 35.5  | 23.6  | 20.7  | 26.8  | 33.3  | 31.7  | 25.7  | 21.3  |
| A2NW98    | Rheumatoi     | MVLQTQV   | 7  | 1 | 5 | 1 | 134  | 14.8  | 7.12  | 184.1 | 175.2 | 115.5 | 138.6 | 151.4 | 138   | 204.9 | 186.7 |
| Q9HD42    | Charged m     | MDDTLFQL  | 4  | 1 | 2 | 1 | 196  | 21.7  | 8.06  | 131   | 102.8 | 87.8  | 109.3 | 136.5 | 115.9 | 107   | 126.2 |
| B7Z6C9    | Transmem      | MSGGLRLF  | 2  | 1 | 1 | 1 | 815  | 92.4  | 6.29  | 34.2  | 23.2  | 32.1  | 28.8  | 36.5  | 27    | 24.3  | 32.7  |
| B2RAF9    | Suppressor    | MGSDRAR   | 2  | 1 | 1 | 1 | 855  | 94.7  | 6.52  | 48.5  | 61.9  | 42.9  | 45.8  | 50.1  | 48.5  | 43.1  | 33.1  |
| P80723    | Brain acid    | MGGKLSKK  | 4  | 1 | 1 | 1 | 227  | 22.7  | 4.63  | 314.6 | 286.2 | 207.2 | 300.1 | 245.8 | 255.1 | 209   | 268   |
| Q92743    | Serine prot   | MQIPRAAL  | 3  | 1 | 1 | 1 | 480  | 51.3  | 7.83  | 299.2 | 82    | 52.3  | 72.8  | 66.7  | 123.9 | 70.4  | 74.4  |
| Q8WU39    | Marginal z    | MRLSLPLL  | 6  | 1 | 2 | 1 | 189  | 20.7  | 5.57  | 39.7  | 45.7  | 28.3  | 46.6  | 36.5  | 35.9  | 39    | 35    |
| O15031    | Plexin-B2 C   | MALQLWA   | 1  | 1 | 1 | 1 | 1838 | 205   | 6.24  |       |       |       |       |       |       |       |       |
| Q9UBV8    | Peflin OS=f   | MASYPYRC  | 3  | 1 | 1 | 1 | 284  | 30.4  | 6.54  | 153.7 | 104.5 | 114.8 | 123.8 | 160   | 110.4 | 104.2 | 99.1  |
| Q13740    | CD166 anti    | MESKGASS  | 2  | 1 | 1 | 1 | 583  | 65.1  | 6.25  | 22.8  | 24.7  | 23    | 22.7  | 23.7  | 21    | 19.2  | 24.8  |
| C9JIF9    | Acylamino     | MERQVLLS  | 2  | 1 | 1 | 1 | 737  | 81.6  | 5.54  | 50.4  | 48.8  | 39.8  | 45.2  | 45    | 55.3  | 33.9  | 37.4  |
| A0N5G7    | Rheumatoi     | GGGVVQP   | 9  | 1 | 1 | 1 | 119  | 13    | 8.94  | 107.1 | 80.3  | 141.9 | 77.7  | 82.6  | 93.1  | 102   | 88.1  |
| U3KQ56    | Glyoxylate    | MRPVRLM   | 5  | 1 | 1 | 1 | 358  | 38.7  | 8.02  | 18.4  | 9.6   | 14.1  | 9.9   | 14.3  | 12.3  | 10.1  | 11.8  |
| P46952    | 3-hydroxy     | MERRLGVF  | 4  | 1 | 2 | 1 | 286  | 32.5  | 5.88  | 85.5  | 71.6  | 66.2  | 73.7  | 85.9  | 76.9  | 59.6  | 70.8  |
| Q9BQR3    | Serine prot   | MRRPAAVI  | 3  | 1 | 1 | 1 | 290  | 31.9  | 8.13  | 65.2  | 64.6  | 51.4  | 74.6  | 71.8  | 76    | 74.8  | 62.1  |
| Q13277    | Syntaxin-3    | MKDRLEQL  | 3  | 1 | 1 | 1 | 289  | 33.1  | 5.44  | 140.8 | 89    | 118.1 | 125.9 | 121   | 118.4 | 103   | 106   |
| Q14764    | Major vau     | MATEEFIIR | 2  | 1 | 1 | 1 | 893  | 99.3  | 5.48  |       |       |       |       |       |       |       |       |
| D6R956    | Ubiquitin c   | MQLKPME   | 4  | 1 | 3 | 1 | 241  | 26.8  | 5.81  | 169.8 | 108.5 | 139.3 | 134.8 | 165.9 | 171.8 | 143.1 | 147.3 |
| P16930    | Fumarylac     | MSFIPVAEI | 2  | 1 | 1 | 1 | 419  | 46.3  | 6.95  |       |       |       |       |       |       |       |       |
| A2TDC0    | Titin-cap (1  | MATSELSC  | 7  | 1 | 1 | 1 | 167  | 19    | 5.25  |       |       |       |       |       |       |       |       |
| Q99584    | Protein S1    | MAAEPLTE  | 11 | 1 | 1 | 1 | 98   | 11.5  | 6.16  | 108.2 | 85.2  | 96.5  | 90.9  | 113.3 | 121.5 | 98.4  | 100   |
| A0A0S2Z6  | Transmem      | MAVWSLL   | 8  | 1 | 2 | 1 | 219  | 23.9  | 6.15  |       |       |       |       |       |       |       |       |
| Q15366    | Poly(rC)-bi   | MDTGVIEG  | 4  | 1 | 2 | 1 | 365  | 38.6  | 6.79  |       |       |       |       |       |       |       |       |
| L7RSM2    | Mitogen-a     | MSQERPTF  | 2  | 1 | 1 | 1 | 360  | 41.5  | 5.88  | 121.3 | 89    | 86.5  | 128.3 | 96.7  | 114.6 | 131.8 | 120.6 |
| Q86SQ4    | Adhesion C    | MMFRSDR   | 1  | 1 | 1 | 1 | 1221 | 136.6 | 7.87  |       |       |       |       |       |       |       |       |
| P29373    | Cellular ret  | MPNFSGNV  | 7  | 1 | 4 | 1 | 138  | 15.7  | 5.4   | 47.2  | 40.6  | 28.7  | 39.7  | 40.1  | 44.5  | 50.4  | 32.7  |
| C9JVC9    | Voltage-de    | MAVPART   | 1  | 1 | 2 | 1 | 1153 | 130   | 5.8   | 212   | 192.2 | 201.4 | 215.3 | 217   | 205.6 | 203.3 | 225.8 |
| A0A024R6  | Endothelin    | MNKSTCLM  | 2  | 1 | 1 | 1 | 532  | 59.4  | 9.25  | 227.3 | 195.1 | 217.3 | 220.6 | 229.2 | 234.7 | 194.8 | 216.1 |
| Q9NX62    | Inositol mc   | MAPMGIR   | 3  | 1 | 2 | 1 | 359  | 38.7  | 6.86  | 22.3  | 18.3  | 15    | 17    | 23    | 24    | 17.2  | 13.2  |
| Q9UBG0    | C-type mar    | MGPGRPA   | 1  | 1 | 1 | 1 | 1479 | 166.6 | 5.83  |       |       |       |       |       |       |       |       |
| P28072    | Proteasom     | MAATLLAA  | 5  | 1 | 1 | 1 | 239  | 25.3  | 4.92  | 61.9  | 39    | 53.2  | 40.9  | 49.1  | 47.2  | 43.9  | 55.8  |
| P40197    | Platelet gly  | MLRGTLIC  | 2  | 1 | 1 | 1 | 560  | 60.9  | 9.63  |       |       |       |       |       |       |       |       |
| P46781    | 40S riboso    | MPVARSW   | 5  | 1 | 1 | 1 | 194  | 22.6  | 10.65 | 156.7 | 139.9 | 111.5 | 155.4 | 134.7 | 90.5  | 199.3 | 93.2  |
| A0A024RA  | HCG20096      | MGWIRGR   | 5  | 1 | 1 | 1 | 216  | 25.3  | 8.21  | 93.7  | 58.4  | 58.6  | 48.5  | 57.5  | 67.9  | 59.5  | 63    |
| Q5R314    | Tetratricop   | MAAASPLF  | 2  | 1 | 1 | 1 | 469  | 52.8  | 5.99  |       |       |       |       |       |       |       |       |

|          |             |           |    |   |    |   |      |       |       |       |        |        |        |        |        |        |        |
|----------|-------------|-----------|----|---|----|---|------|-------|-------|-------|--------|--------|--------|--------|--------|--------|--------|
| A0PJK1   | Sodium/glu  | MAANSTSE  | 2  | 1 | 1  | 1 | 596  | 64.3  | 7.61  |       |        |        |        |        |        |        |        |
| A0A140VK | Leukotrien  | MPEIVDTC  | 2  | 1 | 1  | 1 | 611  | 69.2  | 6.18  | 49.7  | 34.5   | 30     | 42.1   | 50     | 29.8   | 38.7   | 28.3   |
| P23434   | Glycine cle | MALRVVRS  | 6  | 1 | 4  | 1 | 173  | 18.9  | 4.88  | 101.3 | 94.3   | 100.8  | 94.9   | 95.6   | 102.4  | 86.1   | 81.5   |
| Q96HA4   | Uncharact   | MALRHLAL  | 3  | 1 | 1  | 1 | 380  | 40.3  | 10.01 | 186.6 | 156.9  | 179.8  | 192.1  | 167.4  | 158    | 185.4  | 194.7  |
| Q96ID5   | Immunogl    | MRTAPSLR  | 2  | 1 | 1  | 1 | 467  | 51.8  | 6.93  | 28.9  | 32     | 17.1   | 31.9   | 26.6   | 25.8   | 22.6   | 35.5   |
| J3QRU1   | Tyrosine-p  | MLDLIMGC  | 1  | 1 | 1  | 1 | 548  | 61.3  | 6.57  | 98.1  | 69.7   | 95.8   | 90.3   | 92.8   | 94.3   | 70.2   | 81.5   |
| A0A0U1RC | Neurexin-3  | MSSTLHSV  | 0  | 1 | 4  | 1 | 1664 | 183.2 | 5.74  |       |        |        |        |        |        |        |        |
| D0AB04   | Rhesus blo  | GLLLNLKIW | 28 | 1 | 4  | 1 | 25   | 3     | 9.42  |       |        |        |        |        |        |        |        |
| D3DSM8   | Formimino   | MRSRWGG   | 2  | 1 | 1  | 1 | 581  | 63.3  | 6.3   | 46.7  | 34.5   | 25.4   | 26.1   | 42     | 36     | 20.6   | 26.4   |
| A0A024R5 | ADAM met    | MVLLRVLI  | 1  | 1 | 1  | 1 | 748  | 84.1  | 7.77  | 371.3 | 122.3  | 98.8   | 113.3  | 106.5  | 113.2  | 85.4   | 93.2   |
| A0A024R1 | Tyrosylpro  | MRLSVRRV  | 3  | 1 | 1  | 1 | 377  | 41.9  | 9.09  | 77.1  | 96.7   | 65.4   | 77.8   | 80.1   | 60.1   | 81     | 88.3   |
| P28827   | Receptor-t  | MRGLGTCL  | 1  | 1 | 1  | 1 | 1452 | 163.6 | 6.65  |       |        |        |        |        |        |        |        |
| G3V4P8   | Glia matur  | MNKFVGLS  | 7  | 1 | 1  | 1 | 150  | 17.5  | 5.31  | 36.3  | 31.5   | 22.9   | 29.2   | 34.5   | 30.5   | 28.9   | 28.9   |
| Q8IWX7   | Protein un  | MAEVEAVC  | 1  | 1 | 1  | 1 | 931  | 103.7 | 7.81  |       |        |        |        |        |        |        |        |
| Q9Y639   | Neuroplast  | MSGSSLPS  | 2  | 1 | 1  | 1 | 398  | 44.4  | 7.99  | 273.7 | 220.7  | 233.1  | 240.6  | 234.9  | 281.1  | 209.7  | 263.4  |
| Q8IY95   | Transmem    | MAAGGRM   | 4  | 1 | 1  | 1 | 271  | 30.9  | 7.99  |       |        |        |        |        |        |        |        |
| P14778   | Interleukin | MKVLLRLIC | 1  | 1 | 2  | 1 | 569  | 65.4  | 7.83  | 98.9  | 109.7  | 77.3   | 98.7   | 132    | 90     | 76.5   | 90.2   |
| P46108   | Adapter m   | MAGNFDSI  | 2  | 1 | 1  | 1 | 304  | 33.8  | 5.55  | 170.4 | 145.4  | 93.8   | 128.3  | 163.7  | 186.5  | 125.6  | 139.5  |
| Q9Y546   | Leucine-ric | MSYLSSEI  | 3  | 1 | 6  | 1 | 428  | 48.5  | 7.46  | 580   | 771.1  | 389.3  | 745.5  | 575.7  | 444.1  | 517.5  | 408    |
| B2R6Q2   | Alkaline ph | MISPFLVLA | 2  | 1 | 2  | 1 | 524  | 57.2  | 6.57  | 20.5  | 12.8   | 30.9   | 18.2   | 16.3   | 17.3   | 16     | 12     |
| Q9H772   | Gremlin-2   | MFWKLSLS  | 7  | 1 | 1  | 1 | 168  | 19.3  | 9.17  | 72.7  | 99.2   | 63.1   | 96     | 89.2   | 87     | 77.2   | 86.7   |
| P10109   | Adrenodox   | MAAAGGA   | 4  | 1 | 3  | 1 | 184  | 19.4  | 5.83  | 282.1 | 287.3  | 212.5  | 228.2  | 224.3  | 267.8  | 212.3  | 205.4  |
| P23458   | Tyrosine-p  | MQYLNIKE  | 1  | 1 | 2  | 1 | 1154 | 133.2 | 7.55  |       |        |        |        |        |        |        |        |
| Q8N353   | TMEM106     | PRAPGRSL  | 3  | 1 | 2  | 1 | 314  | 35.1  | 8.22  | 249.7 | 232    | 285.2  | 289.5  | 240.2  | 269.5  | 296.3  | 215.6  |
| Q8NF12   | FLJ00390 p  | SQRGKGTC  | 5  | 1 | 1  | 1 | 322  | 35    | 6.68  |       |        |        |        |        |        |        |        |
| Q7RU04   | Aminopept   | MASGEHSF  | 2  | 1 | 1  | 1 | 658  | 73.5  | 6.11  |       |        |        |        |        |        |        |        |
| P0C7U0   | Protein ELF | MAGRGC    | 1  | 1 | 1  | 1 | 828  | 90.4  | 8.37  |       |        |        |        |        |        |        |        |
| Q6ZUY8   | Lipase OS=  | MACLEFVP  | 4  | 1 | 1  | 1 | 401  | 45.4  | 7.11  | 45.1  | 34.9   | 57.1   | 45.1   | 45.9   | 45     | 37.5   | 40.4   |
| Q6LEU6   | HLA-DMB     | MITFLPLL  | 5  | 1 | 1  | 1 | 263  | 28.9  | 7.44  | 37.6  | 28.8   | 35.7   | 28.2   | 25.5   | 29.5   | 24.1   | 30.4   |
| P10586   | Receptor-t  | MAPEPAPC  | 0  | 1 | 2  | 1 | 1907 | 212.7 | 6.3   | 109.7 | 122.4  | 119.4  | 110.8  | 116.3  | 122.4  | 95.8   | 121.8  |
| A8K1K1   | cDNA FLJ7   | MDPKLGRM  | 2  | 1 | 1  | 1 | 507  | 56.7  | 5.36  | 83.8  | 61.6   | 94.7   | 56.6   | 65.2   | 67.2   | 60.9   | 63.4   |
| Q8TDY8   | Immunogl    | MARGDAG   | 1  | 1 | 1  | 1 | 1250 | 134.1 | 6.2   |       |        |        |        |        |        |        |        |
| A0A087WU | ADP-ribosy  | MSDLRITEA | 6  | 1 | 1  | 1 | 204  | 22.9  | 5.63  | 33.6  | 58.9   | 30.3   | 37.4   | 33.8   | 31.1   | 29.3   | 32     |
| Q99835   | Smoothen    | MAAARPA   | 1  | 1 | 4  | 1 | 787  | 86.3  | 8.34  | 292.2 | 222.3  | 203.6  | 298.2  | 367.2  | 328.6  | 232.8  | 361.7  |
| B3KQQ9   | cDNA PSEC   | MAGIPGLL  | 3  | 1 | 1  | 1 | 383  | 43    | 9.36  | 97.5  | 62.7   | 88.2   | 82.1   | 80.9   | 84.8   | 69.6   | 79     |
| Q6ZP37   | cDNA FLJ2   | MAALRQP   | 3  | 1 | 1  | 1 | 396  | 42.9  | 7.24  |       |        |        |        |        |        |        |        |
| O15393   | Transmem    | MALNSGSP  | 2  | 1 | 4  | 1 | 492  | 53.8  | 7.81  |       |        |        |        |        |        |        |        |
| O00159   | Unconvent   | MALQVELV  | 2  | 1 | 1  | 1 | 1063 | 121.6 | 9.41  |       |        |        |        |        |        |        |        |
| A0A024RD | Tyrosylpro  | MVGKCLKQ  | 3  | 1 | 1  | 1 | 370  | 42.2  | 9.09  |       |        |        |        |        |        |        |        |
| P19957   | Elafin OS=  | MRASSFLIV | 14 | 1 | 4  | 1 | 117  | 12.3  | 8.82  | 204   | 327.2  | 133.1  | 251.3  | 208.2  | 235.6  | 373.9  | 296.5  |
| Q5T1S8   | Noncompa    | MTTATPLG  | 7  | 1 | 16 | 1 | 102  | 11.1  | 9.86  | 2252  | 1819.3 | 1528.2 | 2147.8 | 2612.8 | 2270.6 | 1851.4 | 2795.3 |

|           |              |           |   |   |   |   |      |       |       |       |       |       |        |        |       |       |       |
|-----------|--------------|-----------|---|---|---|---|------|-------|-------|-------|-------|-------|--------|--------|-------|-------|-------|
| B2RAK1    | cDNA, FLJ9   | MEPFTNDF  | 1 | 1 | 2 | 1 | 1025 | 117.3 | 5.73  |       |       |       |        |        |       |       |       |
| A6NH11    | Glycolipid   | MGVAARP   | 3 | 1 | 1 | 1 | 291  | 31.6  | 10.15 |       |       |       |        |        |       |       |       |
| P08833    | Insulin-like | MSEVPVAF  | 5 | 1 | 1 | 1 | 259  | 27.9  | 5.19  |       |       |       |        |        |       |       |       |
| Q99795    | Cell surface | MVGKMW    | 3 | 1 | 1 | 1 | 319  | 35.6  | 4.93  |       |       |       |        |        |       |       |       |
| Q96TA2    | ATP-depen    | MFSLSTVC  | 1 | 1 | 1 | 1 | 773  | 86.4  | 8.76  | 108.6 | 85.8  | 72.9  | 123.8  | 115.8  | 164.1 | 164.7 | 165.7 |
| F6SYP7    | Integral me  | MVPKADSC  | 2 | 1 | 1 | 1 | 550  | 60.8  | 5.36  | 262.6 | 279   | 195.5 | 282.6  | 250.6  | 267   | 259   | 280.9 |
| B2R6I6    | cDNA, FLJ9   | MLQNSAVI  | 8 | 1 | 1 | 1 | 247  | 27.6  | 7.99  |       |       |       |        |        |       |       |       |
| E9PGC5    | Receptor-t   | MDTTAAAV  | 1 | 1 | 1 | 1 | 1472 | 165.9 | 5.91  |       |       |       |        |        |       |       |       |
| Q8TE68    | Epidermal    | MSTATGPE  | 1 | 1 | 1 | 1 | 723  | 80.2  | 6.04  | 47.8  | 44.8  | 34.9  | 46.7   | 42.8   | 47.2  | 36.8  | 39.2  |
| Q14165    | Malectin O   | MLGAWAV   | 4 | 1 | 1 | 1 | 292  | 32.2  | 5.41  | 67.4  | 64.6  | 55    | 59.6   | 62.8   | 56.9  | 56.1  | 67.8  |
| A2KUC4    | UGa8L (Fra   | ELTQPHSV  | 7 | 1 | 2 | 1 | 112  | 12.2  | 5.1   | 375.7 | 319   | 316.4 | 301.3  | 390.5  | 367.6 | 435.5 | 372.5 |
| M1VPF4    | Tyrosine-p   | MMEAIIKK  | 2 | 1 | 1 | 1 | 725  | 82.4  | 4.97  | 81.7  | 71.7  | 61.5  | 73.3   | 52.8   | 53.8  | 55.3  | 49    |
| D3DQ48    | Transmem     | MAAPKGS   | 3 | 1 | 3 | 1 | 324  | 36.2  | 5.05  | 178.8 | 126   | 154.3 | 153.8  | 119.6  | 169   | 123.9 | 123.5 |
| B4DT57    | cDNA FLJ6    | MGRDQRA   | 2 | 1 | 3 | 1 | 450  | 50    | 5.6   | 60.3  | 54    | 42.4  | 62.1   | 66.2   | 57.4  | 44.3  | 54.3  |
| Q9ULL1    | Pleckstrin I | MELSDSDR  | 1 | 1 | 8 | 1 | 1385 | 155.3 | 6.24  | 520.4 | 833.4 | 440.1 | 566.1  | 484.9  | 464.1 | 457.1 | 396.8 |
| A0A0B4J1S | Protein SEI  | MVAMAAC   | 8 | 1 | 1 | 1 | 165  | 18    | 5.03  |       |       |       |        |        |       |       |       |
| Q8N729    | Neuropept    | MAWRPGE   | 7 | 1 | 1 | 1 | 165  | 18    | 11.62 | 21    | 19.1  | 14.8  | 17.4   | 23.6   | 19.7  | 15.6  | 17.8  |
| B3KPC7    | Actin-relat  | MARNTLSS  | 8 | 1 | 2 | 1 | 153  | 17    | 6.02  |       |       |       |        |        |       |       |       |
| B4DH02    | cDNA FLJ5    | MSVVGIDL  | 1 | 1 | 1 | 1 | 840  | 94.3  | 5.19  |       |       |       |        |        |       |       |       |
| A0A024R2  | Guanine de   | MCAAQMF   | 3 | 1 | 1 | 1 | 454  | 51    | 5.68  |       |       |       |        |        |       |       |       |
| A0A068LR  | Ig heavy ch  | QVTLRESG  | 6 | 1 | 9 | 1 | 127  | 14    | 8.15  | 446.9 | 414   | 578   | 631.1  | 520.9  | 521.7 | 561.7 | 495.7 |
| O94967    | WD repeat    | MTAETVM   | 1 | 1 | 3 | 1 | 919  | 101.9 | 5.94  | 140.5 | 384.9 | 106.5 | 191.3  | 119.3  | 112.5 | 111.5 | 112.6 |
| A8K3H0    | cDNA FLJ7    | MSLLGPKV  | 5 | 1 | 1 | 1 | 173  | 19.6  | 5.94  |       |       |       |        |        |       |       |       |
| J3KR56    | Receptor a   | METGALRF  | 4 | 1 | 4 | 1 | 151  | 16.8  | 5.48  | 329.3 | 439.9 | 193.7 | 410.1  | 402.2  | 500   | 457.5 | 510.1 |
| O75095    | Multiple ep  | MSFLEEAR  | 1 | 1 | 1 | 1 | 1541 | 161.1 | 6.38  | 188.7 | 164.9 | 178.7 | 187.4  | 194.9  | 219.6 | 160.7 | 178.7 |
| Q06278    | Aldehyde c   | MDRASSELL | 1 | 1 | 1 | 1 | 1338 | 147.8 | 7.17  | 43.4  | 20.8  | 15.3  | 17.6   | 20.7   | 21.5  | 15.2  | 16.3  |
| A0A0G2JS6 | Mucin-4 O    | MKGARWF   | 0 | 1 | 1 | 1 | 7418 | 734.2 | 5.24  |       |       |       |        |        |       |       |       |
| P35606    | Coatomer     | MPLRLDIKI | 1 | 1 | 1 | 1 | 906  | 102.4 | 5.27  | 90    | 81.5  | 62.5  | 73.5   | 80.8   | 93.2  | 72.6  | 66.5  |
| P16401    | Histone H1   | MSETAPAE  | 5 | 1 | 1 | 1 | 226  | 22.6  | 10.92 |       |       |       |        |        |       |       |       |
| A8K8R5    | Receptor p   | MTSSLQRP  | 1 | 1 | 1 | 1 | 1038 | 115.1 | 6.2   |       |       |       |        |        |       |       |       |
| Q86SF2    | N-acetylga   | MRLKIGFIL | 1 | 1 | 1 | 1 | 657  | 75.3  | 7.11  |       |       |       |        |        |       |       |       |
| Q96JF0    | Beta-galac   | MKPHLKQV  | 1 | 1 | 1 | 1 | 529  | 60.1  | 9.74  | 105.2 | 120.9 | 73.2  | 126.2  | 123.8  | 134.8 | 99.8  | 148   |
| Q9Y3E7    | Charged m    | MGLFGKTC  | 4 | 1 | 1 | 1 | 222  | 25.1  | 5.12  |       |       |       |        |        |       |       |       |
| B3KUE5    | Phospholip   | MGLSGSDM  | 2 | 1 | 4 | 1 | 513  | 56.6  | 6.64  | 221.8 | 269.5 | 156.5 | 250.5  | 233.3  | 235.6 | 237.2 | 232   |
| Q68DC2    | Ankyrin rej  | MGEGLPI   | 1 | 1 | 8 | 1 | 871  | 92.2  | 7.39  | 910.8 | 609.8 | 706.6 | 1120.5 | 1042.4 | 634.6 | 748.4 | 647   |
| O60437    | Periplakin   | MNSLFRKR  | 1 | 1 | 2 | 1 | 1756 | 204.6 | 5.6   | 15.7  | 15.8  | 9.9   | 9      | 13.1   | 14.6  | 14.4  | 13.4  |
| Q96IY4    | Carboxype    | MKLCSLAV  | 2 | 1 | 2 | 1 | 423  | 48.4  | 7.71  | 46.5  | 32.7  | 42    | 40.9   | 34.9   | 53.3  | 41    | 27.9  |
| O60241    | Adhesion C   | MENTGWM   | 1 | 1 | 1 | 1 | 1585 | 172.5 | 7.42  |       |       |       |        |        |       |       |       |
| P13686    | Tartrate-re  | MMDWTA    | 6 | 1 | 1 | 1 | 325  | 36.6  | 8.7   |       |       |       |        |        |       |       |       |
| Q93045    | Stathmin-2   | MAKTAMA   | 5 | 1 | 1 | 1 | 179  | 20.8  | 8.32  |       |       |       |        |        |       |       |       |
| Q6IPH7    | RPL14 prot   | MVFRRFVE  | 8 | 1 | 1 | 1 | 220  | 23.8  | 10.93 |       |       |       |        |        |       |       |       |

|          |              |           |    |   |   |   |      |       |       |       |       |       |       |       |       |       |       |
|----------|--------------|-----------|----|---|---|---|------|-------|-------|-------|-------|-------|-------|-------|-------|-------|-------|
| Q8NOV5   | N-acetylac   | MMGSWKI   | 3  | 1 | 1 | 1 | 402  | 45.8  | 7.18  | 23    | 22.7  | 17.1  | 23.8  | 25.7  | 19.9  | 16.4  | 15.5  |
| Q9UK23   | N-acetylglu  | MATSTGRV  | 2  | 1 | 2 | 1 | 515  | 56    | 6.6   | 164.9 | 155.5 | 155.1 | 158.2 | 151.2 | 159.5 | 132.9 | 148.4 |
| Q05D71   | TNFRSF10C    | MARIPKTLI | 3  | 1 | 2 | 1 | 277  | 29.7  | 8.4   | 463.1 | 402.3 | 316.9 | 560.5 | 547.4 | 541.1 | 565.9 | 615.2 |
| A0A096LN | Uncharacte   | MALTKMLI  | 6  | 1 | 6 | 1 | 201  | 23.3  | 9.38  | 257.3 | 160.6 | 152.7 | 267   | 198.8 | 225.7 | 151   | 272.3 |
| Q9UHG3   | Prenylcyst   | MGRVVAE   | 2  | 1 | 1 | 1 | 505  | 56.6  | 6.18  | 93.5  | 91.2  | 76.7  | 88    | 86.7  | 88.3  | 85.8  | 96.8  |
| Q96D15   | Reticulocal  | MMWRPSV   | 2  | 1 | 4 | 1 | 328  | 37.5  | 4.89  | 439.9 | 329.7 | 295.4 | 381.3 | 436.7 | 413.3 | 362.4 | 394.9 |
| A0A0X9T0 | IBM-A2 lig   | DIVMTQSP  | 8  | 1 | 2 | 1 | 113  | 12.2  | 5.01  | 70.5  | 67.8  | 53.6  | 55.9  | 64.1  | 60.7  | 92.6  | 68    |
| Q9H477   | Ribokinase   | MAASGEP   | 2  | 1 | 2 | 1 | 322  | 34.1  | 5.05  | 31.2  | 15.1  | 13    | 16    | 24    | 22.8  | 16.4  | 22.4  |
| B3KV71   | cDNA FLJ1    | MLQLSEFD  | 1  | 1 | 1 | 1 | 831  | 92.6  | 7.42  | 79.2  | 54    | 137.5 | 60.9  | 44.3  | 55.2  | 67.7  | 45.8  |
| Q6UWP8   | Suprabasin   | MHLARLVC  | 2  | 1 | 1 | 1 | 590  | 60.5  | 7.01  | 322.1 | 431.8 | 235.8 | 493.5 | 343.8 | 357.5 | 311.2 | 321.2 |
| B2R736   | cDNA, FLJ9   | MATMVPS   | 2  | 1 | 2 | 1 | 547  | 59.5  | 5.43  | 100.6 | 86.3  | 53.9  | 74.3  | 80.8  | 103.4 | 78.4  | 75    |
| Q9P2B2   | Prostaglan   | MGRLASRF  | 1  | 1 | 1 | 1 | 879  | 98.5  | 6.61  | 151.1 | 136.9 | 192.4 | 141.8 | 142.8 | 165   | 119.9 | 139.1 |
| A2J1N7   | Rheumato     | VESGGGLV  | 7  | 1 | 4 | 1 | 96   | 10.5  | 9.36  | 244.2 | 264.7 | 236   | 253   | 250.6 | 244.8 | 276.4 | 266.9 |
| P12319   | High affinit | MAPAMES   | 3  | 1 | 1 | 1 | 257  | 29.6  | 6.68  | 107.2 | 73.3  | 94.3  | 99.6  | 98.7  | 104.8 | 95.3  | 127.2 |
| B3KQP7   | cDNA FLJ9    | MMTKVLG   | 2  | 1 | 1 | 1 | 450  | 49.7  | 6.61  | 94    | 94.9  | 122   | 95.6  | 94.1  | 166.6 | 113.1 | 105.3 |
| A0A193CH | 10E8 light   | SSELTQETC | 8  | 1 | 1 | 1 | 109  | 11.6  | 9.2   |       |       |       |       |       |       |       |       |
| Q5JU67   | Cilia- and f | MAPKKSVS  | 4  | 1 | 3 | 1 | 520  | 60.5  | 8.81  | 41.2  | 40    | 36.5  | 42.3  | 36    | 39.4  | 42.7  | 31.8  |
| B1PZN7   | MHC class    | MRVTAPRT  | 3  | 1 | 1 | 1 | 362  | 40.4  | 6.46  |       |       |       |       |       |       |       |       |
| P09958   | Furin OS=F   | MELRPWLI  | 1  | 1 | 3 | 1 | 794  | 86.6  | 6.47  |       |       |       |       |       |       |       |       |
| Q6YHK3   | CD109 anti   | MQGPPLLT  | 1  | 1 | 1 | 1 | 1445 | 161.6 | 5.85  |       |       |       |       |       |       |       |       |
| B0LPF3   | Growth fac   | MEAIKYD   | 3  | 1 | 1 | 1 | 217  | 25.2  | 6.32  |       |       |       |       |       |       |       |       |
| Q9BZZ2   | Sialoadhes   | MGFLPKLL  | 1  | 1 | 1 | 1 | 1709 | 182.5 | 6.62  | 101.5 | 120.2 | 93.5  | 101.2 | 107.5 | 104.6 | 89.1  | 111.3 |
| Q53FP0   | Pyridoxine   | MTCWLRG   | 6  | 1 | 1 | 1 | 261  | 29.9  | 7.4   | 35.5  | 30.2  | 26.9  | 27.5  | 41.4  | 30.4  | 33.1  | 24.6  |
| A0A024R0 | Apolipoprc   | MRLFLSLPV | 11 | 1 | 4 | 1 | 83   | 9.3   | 8.47  | 95.6  | 75.6  | 74    | 57.9  | 71.5  | 95.9  | 71.2  | 52    |
| A0A024RA | Endothelin   | MRGVWPF   | 2  | 1 | 1 | 1 | 770  | 87.1  | 5.88  | 166.3 | 175.3 | 120.2 | 174.5 | 180.5 | 154.8 | 182.9 | 207.5 |
| P04424   | Argininosu   | MASESGKL  | 2  | 1 | 1 | 1 | 464  | 51.6  | 6.48  | 125.4 | 75.4  | 121.3 | 103.6 | 133.6 | 87.1  | 110   | 106.8 |
| Q6ZWJ1   | Syntaxin-bi  | MNKNTSTV  | 3  | 1 | 2 | 1 | 553  | 61.6  | 5.2   |       |       |       |       |       |       |       |       |
| A0A024RD | Integrin-bi  | MKTALILLS | 3  | 1 | 1 | 1 | 317  | 35.1  | 4.18  |       |       |       |       |       |       |       |       |
| P20142   | Gastricsin   | MKWMVV    | 2  | 1 | 2 | 1 | 388  | 42.4  | 4.46  | 107.5 | 137   | 62.2  | 150.6 | 96.6  | 71    | 91.8  | 78.6  |
| Q92542   | Nicastrin C  | MATAGGG   | 2  | 1 | 1 | 1 | 709  | 78.4  | 5.99  | 50.6  | 32.3  | 29.2  | 37.5  | 37.2  | 37.7  | 31    | 35.1  |
| Q9Y2G1   | Myelin reg   | MEVVDTE   | 1  | 1 | 1 | 1 | 1151 | 124.3 | 7.44  | 108.2 | 99    | 77    | 81.1  | 90.1  | 85.7  | 74.5  | 91.9  |
| B3KTQ4   | Hexosyltra   | MASALWT   | 3  | 1 | 1 | 1 | 331  | 39.4  | 7.97  | 184.1 | 153.1 | 210.4 | 144.9 | 125.8 | 147.3 | 122.5 | 107.7 |
| B6V6K6   | Mutant my    | MRFFCARC  | 2  | 1 | 2 | 1 | 504  | 57    | 5.54  | 273.1 | 434.3 | 230.1 | 302.4 | 342.3 | 270.8 | 270.1 | 251.9 |
| B2R960   | cDNA, FLJ9   | MVGVKPV   | 2  | 1 | 3 | 1 | 289  | 32.2  | 4.96  | 162.8 | 186.9 | 112.4 | 160.4 | 164.5 | 183.7 | 151   | 184.8 |
| B4E3I3   | cDNA FLJ5    | MFSFNMFI  | 3  | 1 | 1 | 1 | 315  | 35.4  | 5.72  | 91.9  | 67.7  | 66.8  | 61.4  | 62.7  | 64.8  | 53.7  | 61.1  |
| Q14703   | Membrane     | MKLVNIWI  | 1  | 1 | 1 | 1 | 1052 | 117.7 | 8.75  |       |       |       |       |       |       |       |       |
| P23471   | Receptor-t   | MRILKRFLA | 1  | 1 | 1 | 1 | 2315 | 254.4 | 4.88  | 33.9  | 26.3  | 35.7  | 35.2  | 29.6  | 28.6  | 24.3  | 29.3  |
| Q6P4E1   | Protein CA   | MVGFGAN   | 2  | 1 | 2 | 1 | 433  | 48.8  | 5.82  |       |       |       |       |       |       |       |       |
| A0A087W  | ST3 beta-g   | MWQAPRE   | 2  | 1 | 1 | 1 | 384  | 43.4  | 8.92  | 62.4  | 35.8  | 72.8  | 40.3  | 56.4  | 47.6  | 42.7  | 45.8  |
| E7EV01   | Calpain-5 C  | MFSCVKPY  | 1  | 1 | 1 | 1 | 680  | 77.4  | 7.94  |       |       |       |       |       |       |       |       |
| J3QR18   | DNA topoi    | MIFPVARY  | 6  | 1 | 1 | 1 | 139  | 16.1  | 10.48 |       |       |       |       |       |       |       |       |



|          |              |           |    |   |   |   |      |       |       |       |       |       |       |       |       |       |       |
|----------|--------------|-----------|----|---|---|---|------|-------|-------|-------|-------|-------|-------|-------|-------|-------|-------|
| H9KV90   | SH3 and m    | MTHSPATS  | 0  | 1 | 1 | 1 | 2169 | 225.8 | 8.34  | 32.4  | 59.1  | 19.8  | 34.2  | 26.4  | 25.5  | 25.7  | 24.1  |
| Q6ZMJ2   | Scavenger    | MENKAMY   | 2  | 1 | 1 | 1 | 495  | 54    | 7.09  | 80    | 55.5  | 57.2  | 59.4  | 60.6  | 63.7  | 55.6  | 63.4  |
| Q9BV40   | Vesicle-ass  | MEEASEGC  | 8  | 1 | 1 | 1 | 100  | 11.4  | 7.34  |       |       |       |       |       |       |       |       |
| A0A0A0M7 | Coiled-coil  | MALSPWTI  | 1  | 1 | 2 | 1 | 828  | 97.4  | 5.99  | 281.2 | 262.2 | 280.7 | 293.6 | 264.5 | 208   | 192.8 | 202.2 |
| A0A024R8 | Ubiquitinyl  | MARMGDS   | 1  | 1 | 2 | 1 | 916  | 102.2 | 6.21  | 112.1 | 107.2 | 78.8  | 69.7  | 85.9  | 42.1  | 105.9 | 41.4  |
| O15162   | Phospholip   | MDKQNSQ   | 2  | 1 | 1 | 1 | 318  | 35    | 4.94  | 205.7 | 163.4 | 106.6 | 181.5 | 210.2 | 132.2 | 135   | 154.9 |
| A0A0A0M7 | TATA-bind    | MGVFRLEF  | 0  | 1 | 2 | 1 | 1849 | 206.8 | 6.52  | 150.2 | 175.6 | 91.6  | 143.8 | 122.6 | 121.4 | 128.8 | 119.7 |
| A6NFX8   | ADP-sugar    | MESQEPT   | 4  | 1 | 1 | 1 | 232  | 25.9  | 5.19  | 46.1  | 39.3  | 35.6  | 37.6  | 40.7  | 36.5  | 34.2  | 29.5  |
| Q2M204   | HCG16428     | MAWQVSL   | 3  | 1 | 1 | 1 | 487  | 54.7  | 7.61  |       |       |       |       |       |       |       |       |
| H7BXI7   | Ly6/PLAUR    | MRYKSSDR  | 8  | 1 | 1 | 1 | 183  | 20.7  | 7.94  | 25.9  | 23.7  | 18.6  | 31.7  | 27.9  | 23.4  | 30.1  | 26.6  |
| Q9UKR3   | Kallikrein-1 | MWPLALV   | 4  | 1 | 1 | 1 | 277  | 30.6  | 8.46  |       |       |       |       |       |       |       |       |
| D6RH31   | Nephronec    | MDFLLALV  | 1  | 1 | 3 | 1 | 609  | 66.9  | 8.4   | 184   | 165.7 | 166   | 194.7 | 211.6 | 215.6 | 190.8 | 231.7 |
| O60662   | Kelch-like p | MDSQRELA  | 1  | 1 | 2 | 1 | 606  | 68    | 5.29  | 206.4 | 201.9 | 144.9 | 184.8 | 165.7 | 83.2  | 100.6 | 188   |
| A0A087WU | C-C motif c  | MKVSEAAAL | 21 | 1 | 3 | 1 | 53   | 5.7   | 11.55 |       |       |       |       |       |       |       |       |
| Q5HYA8   | Meckelin C   | MATRGGA   | 2  | 1 | 3 | 1 | 995  | 111.7 | 6.77  | 32.6  | 60.4  | 41.1  | 38.3  | 27.6  | 23.4  | 20.2  | 21.4  |
| Q96AM1   | Mas-relate   | MAGNCSW   | 4  | 1 | 1 | 1 | 343  | 38.1  | 8.56  | 27.7  | 26.4  | 25.6  | 31.8  | 32.9  | 30.5  | 29.3  | 34.8  |
| B3KQQ3   | cDNA PSEC    | MTSSGPGF  | 1  | 1 | 1 | 1 | 738  | 84.6  | 6.2   | 71.9  | 51.7  | 60.1  | 64.1  | 70.2  | 82    | 62.3  | 59.6  |
| Q9BQG1   | Synaptotag   | MSGDYEDI  | 2  | 1 | 1 | 1 | 590  | 63.3  | 6.62  |       |       |       |       |       |       |       |       |
| O95445   | Apolipoproc  | MFHQIWA   | 4  | 1 | 8 | 1 | 188  | 21.2  | 6.01  | 331.8 | 428.4 | 231.7 | 343.3 | 397.3 | 419.1 | 288   | 354.3 |



| Uniprot<br>Accession<br>Number | Protein<br>amino acid<br>sequence | Protein<br>amino acid<br>sequence<br>degree(%) | The<br>number of<br>peptides<br>identified | The total<br>number of<br>times a<br>polypepti<br>de was<br>identified | The<br>number of<br>characteri<br>peptides<br>identified | Amino<br>acid length | KDa   | isoelectric<br>point | relative<br>abundanc<br>e of<br>normalize<br>d protein -<br>control |               |                |
|--------------------------------|-----------------------------------|------------------------------------------------|--------------------------------------------|------------------------------------------------------------------------|----------------------------------------------------------|----------------------|-------|----------------------|---------------------------------------------------------------------|---------------|----------------|
|                                |                                   |                                                |                                            |                                                                        |                                                          |                      |       |                      | sample<br>113                                                       | sample<br>121 | ratio(113/121) |
| Q4TZM4                         | Hemoglobi TPEEKSAVT               | 89                                             | 8                                          | 135                                                                    | 2                                                        | 101                  | 11    | 6.52                 | 799.4                                                               | 134.5         | 5.943494       |
| D9YZU5                         | Beta-globir MVHLTPEE              | 78                                             | 10                                         | 328                                                                    | 1                                                        | 147                  | 16    | 7.28                 | 44720.1                                                             | 8175.3        | 5.470148       |
| A0A1K0GX                       | Globin C1 ( MSAARPG\              | 50                                             | 6                                          | 182                                                                    | 6                                                        | 177                  | 19.2  | 9.77                 | 29618.2                                                             | 6799.3        | 4.356066       |
| Q92743                         | Serine prot MQIPRAAL              | 3                                              | 1                                          | 1                                                                      | 1                                                        | 480                  | 51.3  | 7.83                 | 299.2                                                               | 74.4          | 4.021505       |
| A0A024R5I                      | ADAM met MVLLRVLIL                | 1                                              | 1                                          | 1                                                                      | 1                                                        | 748                  | 84.1  | 7.77                 | 371.3                                                               | 93.2          | 3.983906       |
| A0A024R8I                      | UbiquitinyI MARMGDS               | 1                                              | 1                                          | 2                                                                      | 1                                                        | 916                  | 102.2 | 6.21                 | 112.1                                                               | 41.4          | 2.707729       |
| P02545                         | Prelamin-A METPSQRF               | 2                                              | 1                                          | 1                                                                      | 1                                                        | 664                  | 74.1  | 7.02                 | 173.5                                                               | 64.1          | 2.706708       |
| Q06278                         | Aldehyde c MDRASELL               | 1                                              | 1                                          | 1                                                                      | 1                                                        | 1338                 | 147.8 | 7.17                 | 43.4                                                                | 16.3          | 2.662577       |
| Q9Y2S2                         | Lambda-cr MASSAAGC                | 13                                             | 4                                          | 25                                                                     | 4                                                        | 319                  | 35.4  | 6.18                 | 1726.9                                                              | 653.3         | 2.643349       |
| A0A161I20                      | Lactoferrin MKLVFLVLI             | 54                                             | 34                                         | 466                                                                    | 0                                                        | 711                  | 78.3  | 8.18                 | 39936.6                                                             | 15145.7       | 2.636828       |
| B2R9K8                         | cDNA, FLJ9 MAAVKTLN               | 2                                              | 1                                          | 1                                                                      | 1                                                        | 531                  | 57.9  | 6.8                  | 45.5                                                                | 17.3          | 2.630058       |
| I3L0A0                         | HCG20447 MAGAENV                  | 5                                              | 2                                          | 7                                                                      | 2                                                        | 370                  | 42.2  | 6.71                 | 377.8                                                               | 148.5         | 2.544108       |
| A0A024R3I                      | Apolipoprc MKA AVLTL              | 60                                             | 16                                         | 172                                                                    | 16                                                       | 267                  | 30.8  | 5.76                 | 14099.8                                                             | 5583.4        | 2.525307       |
| COJYY2                         | Apolipoprc MDPPRPAL               | 1                                              | 3                                          | 5                                                                      | 3                                                        | 4563                 | 515.2 | 7.05                 | 99.2                                                                | 40.5          | 2.449383       |
| K7ES00                         | Histone H3 MARTKQT/               | 9                                              | 2                                          | 8                                                                      | 2                                                        | 151                  | 16.6  | 11.84                | 1428.3                                                              | 602.6         | 2.370229       |
| A0A1K0FU                       | Globin E1 ( MLSAQERA              | 11                                             | 1                                          | 1                                                                      | 1                                                        | 141                  | 15.6  | 6.62                 | 18.4                                                                | 7.8           | 2.358974       |
| A0A0A1HA                       | H.sapiens r MAYAYLFK              | 14                                             | 2                                          | 5                                                                      | 2                                                        | 212                  | 23.6  | 6.54                 | 208.1                                                               | 92.1          | 2.259501       |
| Q8WWQ8                         | Stabilin-2 ( MMLQHLV              | 0                                              | 1                                          | 1                                                                      | 1                                                        | 2551                 | 276.8 | 6.4                  | 26.1                                                                | 11.6          | 2.25           |
| B2R4R0                         | Histone H4 MSGRGKG                | 50                                             | 5                                          | 58                                                                     | 5                                                        | 103                  | 11.4  | 11.36                | 3267.7                                                              | 1469.8        | 2.223228       |
| Q59EU6                         | EF hand do CEERAARQ               | 4                                              | 1                                          | 1                                                                      | 1                                                        | 265                  | 29.8  | 6.21                 | 22.4                                                                | 10.2          | 2.196078       |
| O75787                         | Renin rece MAVFVLL                | 5                                              | 2                                          | 5                                                                      | 2                                                        | 350                  | 39    | 6.1                  | 973.9                                                               | 450.3         | 2.16278        |
| V9HVV1                         | Epididymis MKRMVSM                | 25                                             | 11                                         | 29                                                                     | 11                                                       | 491                  | 55.9  | 8.27                 | 2437.8                                                              | 1138.4        | 2.141427       |
| P24158                         | Myeloblast MAHRPPSF               | 17                                             | 3                                          | 17                                                                     | 3                                                        | 256                  | 27.8  | 8.35                 | 615.9                                                               | 289.9         | 2.124526       |
| A0A0U1RR                       | Histone H2 MSGRGKQ                | 14                                             | 3                                          | 13                                                                     | 3                                                        | 170                  | 18.5  | 11.52                | 1265.2                                                              | 601.7         | 2.102709       |
| A0A0X9UW                       | IBM-A3 he: EVQLVQSG               | 20                                             | 2                                          | 5                                                                      | 2                                                        | 127                  | 14.4  | 8.37                 | 93.6                                                                | 45            | 2.08           |

|           |              |           |    |    |     |    |      |       |       |        |        |          |
|-----------|--------------|-----------|----|----|-----|----|------|-------|-------|--------|--------|----------|
| P01023    | Alpha-2-mi   | MGKNKLLF  | 14 | 17 | 49  | 17 | 1474 | 163.2 | 6.46  | 2846.8 | 1389.4 | 2.048942 |
| P08246    | Neutrophil   | MTLGRRLA  | 6  | 2  | 11  | 2  | 267  | 28.5  | 9.35  | 698    | 343.6  | 2.031432 |
| Q7L9L4    | MOB kinas    | MSFLGSR:  | 5  | 1  | 1   | 1  | 216  | 25.1  | 6.73  | 20.6   | 10.2   | 2.019608 |
| C9JC84    | Fibrinogen   | MSWSLHPI  | 28 | 9  | 37  | 9  | 461  | 52.3  | 5.63  | 1762.4 | 884.6  | 1.992313 |
| A0A024R1: | Glycerol-3-  | MASKKVCI' | 9  | 3  | 10  | 3  | 349  | 37.5  | 6.18  | 871.9  | 437.7  | 1.992004 |
| A0A0X9UM  | MS-B1 ligh   | DIQMTQSP  | 32 | 2  | 101 | 1  | 107  | 11.5  | 7.96  | 22     | 11.2   | 1.964286 |
| P13647    | Keratin, tyj | MSRQSSVS  | 18 | 11 | 34  | 4  | 590  | 62.3  | 7.74  | 21.6   | 11     | 1.963636 |
| A1A4E9    | Keratin 13   | MSLRLQSS: | 25 | 14 | 107 | 9  | 458  | 49.6  | 4.96  | 6278.1 | 3225.2 | 1.946577 |
| B4DR52    | Histone H2   | MPDPAKSA  | 20 | 3  | 22  | 3  | 166  | 18    | 10.32 | 1928   | 992.5  | 1.942569 |
| B2RCC8    | cDNA, FLJ9   | MFLWFLII  | 2  | 1  | 1   | 1  | 837  | 94.4  | 7.97  | 34.1   | 17.6   | 1.9375   |
| P13797    | Plastin-3 O  | MDEMATT   | 9  | 6  | 20  | 3  | 630  | 70.8  | 5.6   | 72.7   | 38.2   | 1.903141 |
| Q6PCB0    | von Willeb   | MLPWTA(L  | 9  | 3  | 9   | 3  | 445  | 46.8  | 7.68  | 686.2  | 360.7  | 1.902412 |
| P24298    | Alanine am   | MASSTGDF  | 4  | 2  | 2   | 2  | 496  | 54.6  | 7.18  | 107.8  | 57.6   | 1.871528 |
| A4D0V4    | Capping pr   | MADLEEQL  | 9  | 2  | 5   | 1  | 286  | 32.9  | 5.85  | 38     | 20.4   | 1.862745 |
| A2JA16    | Anti-mucin   | DIQMTQSP  | 32 | 2  | 41  | 1  | 107  | 11.6  | 8.46  | 702.5  | 377.5  | 1.860927 |
| A0A024R0' | Apolipoprc   | MRLFLSLP\ | 11 | 1  | 4   | 1  | 83   | 9.3   | 8.47  | 95.6   | 52     | 1.838462 |
| V9HW91    | Epididymis   | MTSFRLALI | 22 | 4  | 7   | 4  | 276  | 30.6  | 7.21  | 119.5  | 65.2   | 1.832822 |
| A0A075B6: | Protein IGk  | MDMRVPA   | 14 | 1  | 2   | 1  | 117  | 12.7  | 9.25  | 36.2   | 20.1   | 1.800995 |
| S6BAP4    | IgG H chair  | MDWTWRI   | 22 | 4  | 123 | 1  | 275  | 29.4  | 8.51  | 26.2   | 14.6   | 1.794521 |
| D3DRR6    | Inter-alpha  | MKRLTCFFI | 5  | 4  | 10  | 4  | 947  | 106.5 | 6.95  | 446.9  | 249.7  | 1.789748 |
| Q9Y3R5    | Protein doj  | MDPEEQEL  | 0  | 1  | 1   | 1  | 2298 | 258.1 | 6.29  | 33.4   | 18.7   | 1.786096 |
| Q96MU8    | Kremen pr    | MAPPAARI  | 3  | 1  | 1   | 1  | 473  | 51.7  | 7.11  | 48.9   | 27.5   | 1.778182 |
| P18085    | ADP-ribosy   | MGLTISSLF | 6  | 1  | 1   | 1  | 180  | 20.5  | 7.14  | 36.6   | 20.6   | 1.776699 |
| B1PS43    | Myosin he:   | MAQKGQL   | 1  | 2  | 7   | 2  | 2029 | 234.1 | 5.8   | 277.4  | 156.6  | 1.771392 |
| A0A024R1, | Testicular s | MSSSPLSKk | 6  | 4  | 8   | 4  | 1058 | 117.8 | 5.76  | 235.7  | 133.1  | 1.770849 |
| D3DSM8    | Formimino    | MRSRWGG   | 2  | 1  | 1   | 1  | 581  | 63.3  | 6.3   | 46.7   | 26.4   | 1.768939 |
| P05164    | Myeloper     | MGVPPFSS  | 20 | 13 | 48  | 13 | 745  | 83.8  | 8.97  | 2474.9 | 1404.2 | 1.762498 |
| P08729    | Keratin, tyj | MSIHFSSP\ | 9  | 5  | 14  | 2  | 469  | 51.4  | 5.48  | 137.6  | 78.3   | 1.757344 |
| A0A140VK: | Leukotrien   | MPEIVDTC: | 2  | 1  | 1   | 1  | 611  | 69.2  | 6.18  | 49.7   | 28.3   | 1.756184 |
| A0A087WS  | Nucleobinc   | MRWRTILL  | 2  | 1  | 2   | 1  | 420  | 50.2  | 5.12  | 86.5   | 49.3   | 1.754564 |
| P19013    | Keratin, tyj | MIARQQC\  | 20 | 10 | 34  | 7  | 534  | 57.3  | 6.61  | 1337.8 | 765.5  | 1.747616 |
| B2RD36    | cDNA, FLJ9   | MANEAYPC  | 15 | 4  | 17  | 4  | 245  | 28    | 6.79  | 1492.3 | 855.7  | 1.743952 |
| A0A024RD  | Lymphocyt    | MARGSVSE  | 14 | 8  | 34  | 5  | 627  | 70.2  | 5.43  | 1083.2 | 623.7  | 1.736732 |

|          |                        |    |    |     |    |      |       |       |         |         |          |
|----------|------------------------|----|----|-----|----|------|-------|-------|---------|---------|----------|
| Q59ER5   | WD repeat RAGPGGSR     | 2  | 1  | 2   | 1  | 624  | 68.1  | 7.23  | 103.8   | 59.9    | 1.732888 |
| B3KV71   | cDNA FLJ11 MLQLSEFD    | 1  | 1  | 1   | 1  | 831  | 92.6  | 7.42  | 79.2    | 45.8    | 1.729258 |
| B9EKV4   | Aldehyde c MFLRAGLA    | 3  | 1  | 5   | 1  | 518  | 56.3  | 6.57  | 20.2    | 11.7    | 1.726496 |
| P04040   | Catalase O: MADSRDP/   | 9  | 4  | 4   | 4  | 527  | 59.7  | 7.39  | 208.2   | 121     | 1.720661 |
| P29401   | Transketol: MESYHKPC   | 5  | 2  | 3   | 2  | 623  | 67.8  | 7.66  | 169.1   | 98.4    | 1.718496 |
| E7EMK3   | Flotillin-2 C MGNCHTV  | 5  | 2  | 3   | 2  | 483  | 53.1  | 5.24  | 47.2    | 27.6    | 1.710145 |
| B3KTQ4   | Hexosyltra MASALWT'    | 3  | 1  | 1   | 1  | 331  | 39.4  | 7.97  | 184.1   | 107.7   | 1.709378 |
| B2R6Q2   | Alkaline ph MISPLVLA   | 2  | 1  | 2   | 1  | 524  | 57.2  | 6.57  | 20.5    | 12      | 1.708333 |
| A0A024RC | CD99 antig MVAWRSA     | 6  | 1  | 4   | 1  | 262  | 28    | 5.14  | 161.6   | 94.6    | 1.708245 |
| K7EJ20   | Glutathion MCASRDD\    | 5  | 1  | 3   | 1  | 242  | 26.8  | 9.31  | 102.6   | 60.1    | 1.707155 |
| P52209   | 6-phospho MAQADIAL     | 7  | 3  | 7   | 3  | 483  | 53.1  | 7.23  | 65.6    | 38.5    | 1.703896 |
| Q9NX62   | Inositol mc MAPMGIRI   | 3  | 1  | 2   | 1  | 359  | 38.7  | 6.86  | 22.3    | 13.2    | 1.689394 |
| P46781   | 40S ribosol MPVARSW    | 5  | 1  | 1   | 1  | 194  | 22.6  | 10.65 | 156.7   | 93.2    | 1.68133  |
| Q6UW88   | Epigen OS- MALGVPIST'  | 8  | 1  | 1   | 1  | 154  | 17.1  | 6.95  | 84.1    | 50.2    | 1.675299 |
| J3KQ18   | D-dopachro MQLFLLAV    | 23 | 3  | 7   | 3  | 132  | 14.2  | 7.3   | 368.8   | 220.3   | 1.674081 |
| P00915   | Carbonic an MASPDPWG   | 18 | 4  | 31  | 4  | 261  | 28.9  | 7.12  | 1363.4  | 816.3   | 1.670219 |
| M1VVF4   | Tyrosine-ph MMEAIIKKk  | 2  | 1  | 1   | 1  | 725  | 82.4  | 4.97  | 81.7    | 49      | 1.667347 |
| Q96IY4   | Carboxype MKLCSLAV     | 2  | 1  | 2   | 1  | 423  | 48.4  | 7.71  | 46.5    | 27.9    | 1.666667 |
| O95861   | 3'(2'),5'-bis MASSNTVL | 3  | 1  | 1   | 1  | 308  | 33.4  | 5.69  | 35.5    | 21.3    | 1.666667 |
| V9HWA9   | Epididymis MGPTSGPS    | 35 | 55 | 305 | 55 | 1663 | 187   | 6.4   | 17774.3 | 10679.9 | 1.664276 |
| A0A0C4DH | Protein IGF MQFVLSW'   | 9  | 1  | 4   | 1  | 116  | 12.8  | 9.25  | 329.9   | 198.3   | 1.663641 |
| V9HW87   | Abhydrolas MAASVEQf    | 33 | 5  | 33  | 5  | 210  | 22.3  | 6.4   | 1439.8  | 868.9   | 1.657038 |
| A0A087WY | Seizure 6-li MGTPRAQl  | 4  | 3  | 7   | 3  | 923  | 99.1  | 4.87  | 178     | 107.6   | 1.654275 |
| V9GYM3   | Apolipoproc MCEQHPKI   | 14 | 2  | 10  | 2  | 133  | 14.9  | 8.27  | 521.7   | 315.6   | 1.653042 |
| Q5U043   | S-(hydroxy MANEVIKC    | 9  | 3  | 8   | 3  | 374  | 39.7  | 7.49  | 298     | 183     | 1.628415 |
| B2R7D2   | cDNA, FLJ9 MLRAPGCL    | 13 | 5  | 9   | 5  | 487  | 55.1  | 7.97  | 294.3   | 181.1   | 1.625069 |
| X6R8A1   | Carboxype MTSSPRAP     | 20 | 9  | 131 | 9  | 498  | 56.2  | 6.61  | 9108.3  | 5613.9  | 1.622455 |
| Q86TD4   | Sarcalumei MRALVLLG    | 1  | 1  | 1   | 1  | 932  | 100.7 | 4.4   | 99.6    | 61.5    | 1.619512 |
| P80511   | Protein S1( MTKLEEHL   | 8  | 1  | 5   | 1  | 92   | 10.6  | 6.25  | 1210    | 750.5   | 1.612258 |
| Q9UKU6   | Thyrotropi MGEDDAA     | 7  | 6  | 14  | 6  | 1024 | 116.9 | 6.99  | 567.4   | 353.4   | 1.605546 |
| A8K669   | cDNA FLJ7 MVWKVAV      | 4  | 1  | 3   | 1  | 433  | 49.4  | 6.55  | 48.8    | 30.4    | 1.605263 |
| Q0ZCJ2   | Immunglob LVQLVESG(    | 46 | 5  | 89  | 1  | 124  | 13.6  | 7.93  | 38.8    | 24.3    | 1.596708 |
| G3V5Z7   | Proteasom MSRGSSAC     | 8  | 2  | 2   | 2  | 252  | 28.1  | 6.76  | 170.1   | 106.8   | 1.592697 |

|          |                        |    |    |     |    |     |       |       |        |        |          |
|----------|------------------------|----|----|-----|----|-----|-------|-------|--------|--------|----------|
| V9HW90   | Epididymis MALLPRAL    | 5  | 2  | 11  | 2  | 522 | 56.2  | 8.5   | 295.1  | 185.3  | 1.592553 |
| A0A024R4 | Alkaline ph MQGPWVL    | 3  | 2  | 4   | 2  | 528 | 56.8  | 5.86  | 95.8   | 60.2   | 1.591362 |
| P02792   | Ferritin ligt MSSQIRQN | 18 | 3  | 7   | 3  | 175 | 20    | 5.78  | 159.7  | 100.4  | 1.590637 |
| A0A0K0K1 | Epididymis MAMLRVQ     | 13 | 3  | 8   | 3  | 249 | 28.7  | 6.02  | 527.2  | 331.6  | 1.589867 |
| P51606   | N-acylgluc MSKGLPAR    | 3  | 1  | 2   | 1  | 427 | 48.8  | 6.37  | 88.6   | 55.8   | 1.587814 |
| A0A024RB | Solute carr MMGSPVS    | 2  | 1  | 2   | 1  | 540 | 56.4  | 6.83  | 103.6  | 65.3   | 1.586524 |
| A0A0R7FJ | Coagulatio MRALLLLG    | 6  | 2  | 6   | 2  | 615 | 67.8  | 7.8   | 132    | 83.3   | 1.584634 |
| V9HW48   | SH3 domai MVIRVYIAS    | 35 | 3  | 13  | 3  | 114 | 12.8  | 5.25  | 89     | 56.2   | 1.58363  |
| P51688   | N-sulphogl MSCPVPAC    | 11 | 5  | 30  | 5  | 502 | 56.7  | 6.95  | 917.1  | 582.5  | 1.574421 |
| P20160   | Azurocidin MTRLTVLA    | 14 | 3  | 27  | 3  | 251 | 26.9  | 9.5   | 960.4  | 611.6  | 1.570307 |
| A0A024R6 | Galactosyl MAEWLLS     | 1  | 1  | 2   | 1  | 685 | 77    | 6.64  | 99.9   | 63.7   | 1.568289 |
| A6NFX8   | ADP-sugar MESQEPT      | 4  | 1  | 1   | 1  | 232 | 25.9  | 5.19  | 46.1   | 29.5   | 1.562712 |
| Q12929   | Epidermal MNGHISN      | 4  | 3  | 4   | 3  | 822 | 91.8  | 7.5   | 155.1  | 99.3   | 1.561934 |
| U3KQ56   | Glyoxylate MRPVRLM     | 5  | 1  | 1   | 1  | 358 | 38.7  | 8.02  | 18.4   | 11.8   | 1.559322 |
| P08263   | Glutathion MAEKPKLH    | 18 | 5  | 78  | 1  | 222 | 25.6  | 8.88  | 515.5  | 331    | 1.557402 |
| Q7L5L3   | Glycerophc MSLLLYAL    | 4  | 1  | 1   | 1  | 318 | 36.6  | 7.97  | 18.2   | 11.7   | 1.555556 |
| Q9UBV8   | Peflin OS=I MASYPYRC   | 3  | 1  | 1   | 1  | 284 | 30.4  | 6.54  | 153.7  | 99.1   | 1.550959 |
| A8K0T9   | cDNA FLJ7 MADFDDR      | 17 | 3  | 6   | 2  | 286 | 32.9  | 5.69  | 370.4  | 238.9  | 1.55044  |
| P06727   | Apolipoprc MFLKAVVL    | 54 | 21 | 120 | 21 | 396 | 45.4  | 5.38  | 8194   | 5285.4 | 1.550308 |
| B2RCQ6   | cDNA, FLJ9 MPPVGGKI    | 55 | 18 | 112 | 3  | 406 | 44.9  | 7.24  | 7840.2 | 5058.9 | 1.549784 |
| P12724   | Eosinophil MVPKLFTS    | 17 | 2  | 5   | 2  | 160 | 18.4  | 10.02 | 120.6  | 77.9   | 1.548139 |
| P05787   | Keratin, tyj MSIRVTQK  | 18 | 10 | 40  | 6  | 483 | 53.7  | 5.59  | 585.3  | 378.4  | 1.546776 |
| Q14117   | Dihydropyl MAAPSRL     | 3  | 2  | 6   | 2  | 519 | 56.6  | 7.27  | 201.8  | 130.9  | 1.541635 |
| B3KWI4   | cDNA FLJ4 MPLKHILL     | 6  | 3  | 9   | 3  | 581 | 64.4  | 6.71  | 186.2  | 120.9  | 1.540116 |
| Q00796   | Sorbitol de MAAAAPPI   | 15 | 5  | 11  | 5  | 357 | 38.3  | 7.97  | 686.6  | 446.2  | 1.538772 |
| P15104   | Glutamine MTTSASSH     | 2  | 1  | 1   | 1  | 373 | 42    | 6.89  | 40.6   | 26.4   | 1.537879 |
| P55786   | Puromycin MWLAAAA      | 4  | 3  | 3   | 3  | 919 | 103.2 | 5.72  | 36.4   | 23.7   | 1.535865 |
| P14174   | Macrophag MPMFIVNT     | 8  | 1  | 30  | 1  | 115 | 12.5  | 7.88  | 2360.8 | 1538   | 1.53498  |
| P11234   | Ras-relatec MAANKSKC   | 7  | 1  | 2   | 1  | 206 | 23.4  | 6.62  | 29.3   | 19.1   | 1.534031 |
| Q53Y06   | ATPase, H+ MALSDAD\    | 4  | 1  | 4   | 1  | 226 | 26.1  | 8     | 222.5  | 145.2  | 1.532369 |
| P59665   | Neutrophil MRTLAILA    | 19 | 2  | 29  | 2  | 94  | 10.2  | 6.99  | 2669.7 | 1746.8 | 1.528338 |
| E9KL23   | Epididymis MPSSVSWC    | 53 | 24 | 660 | 1  | 418 | 46.7  | 5.59  | 2619.7 | 1716   | 1.526632 |
| A0A024RA | Betaine-ho MAPAGRPC    | 31 | 9  | 47  | 5  | 363 | 40.3  | 5.87  | 337.8  | 221.3  | 1.526435 |

|           |                        |    |    |     |   |      |       |      |         |         |          |
|-----------|------------------------|----|----|-----|---|------|-------|------|---------|---------|----------|
| Q5HYA8    | Meckelin C MATRGGAI    | 2  | 1  | 3   | 1 | 995  | 111.7 | 6.77 | 32.6    | 21.4    | 1.523364 |
| Q7Z4W1    | L-xylulose 1 MELFLAGR  | 4  | 1  | 3   | 1 | 244  | 25.9  | 8.1  | 245.2   | 161     | 1.522981 |
| B1AKK2    | Dimethylar MAGLGHP,    | 11 | 3  | 20  | 2 | 285  | 31.1  | 5.81 | 361.4   | 237.8   | 1.519765 |
| A0A140VK  | Testis secret MDPRKVNI | 8  | 3  | 7   | 3 | 369  | 41.3  | 5.27 | 306     | 201.6   | 1.517857 |
| Q8N7G1    | Purine nucle MENGTYE   | 19 | 5  | 11  | 5 | 293  | 32.5  | 7.21 | 184.8   | 121.9   | 1.515997 |
| B4DMS4    | cDNA FLJ5 MGKLSRCS     | 2  | 2  | 4   | 2 | 812  | 88.4  | 4.4  | 558.8   | 369.1   | 1.513953 |
| Q9HB40    | Retinoid-in MELALRRS   | 6  | 3  | 41  | 3 | 452  | 50.8  | 5.81 | 1368.6  | 904.6   | 1.512934 |
| A0A0B4J1F | 4-hydroxy MTTYSDKG     | 12 | 4  | 4   | 4 | 393  | 44.9  | 7.01 | 135.8   | 90      | 1.508889 |
| Q9UHY7    | Enolase-ph MVVLSVPA    | 5  | 1  | 1   | 1 | 261  | 28.9  | 4.78 | 17.8    | 11.8    | 1.508475 |
| P23526    | Adenosylh MSDKLPYK     | 19 | 8  | 23  | 8 | 432  | 47.7  | 6.34 | 1319.8  | 875     | 1.508343 |
| A0A024QZ  | NAD(P)H d MAGKKVLI     | 4  | 1  | 1   | 1 | 231  | 25.9  | 6.29 | 99.8    | 66.2    | 1.507553 |
| B3KUI5    | Hyaluronid MAAHLLPI    | 18 | 5  | 27  | 5 | 435  | 48.3  | 6.96 | 879.3   | 584     | 1.505651 |
| Q96KP4    | Cytosolic n MAALTTLF   | 24 | 8  | 29  | 8 | 475  | 52.8  | 5.97 | 933.4   | 620     | 1.505484 |
| O14786    | Neuropilin MERGLPLL    | 2  | 1  | 4   | 1 | 923  | 103.1 | 5.88 | 17      | 11.3    | 1.504425 |
| B4E3I3    | cDNA FLJ5 MFSFNMFI     | 3  | 1  | 1   | 1 | 315  | 35.4  | 5.72 | 91.9    | 61.1    | 1.504092 |
| Q9HC38    | Glyoxalase MAARRALF    | 6  | 2  | 9   | 2 | 313  | 34.8  | 5.6  | 498.6   | 331.6   | 1.503619 |
| B2RAN2    | cDNA, FLJ9 MTTQLPAY    | 4  | 2  | 5   | 2 | 513  | 57    | 5.57 | 354.5   | 235.9   | 1.502755 |
| P63261    | Actin, cyto MEEEEIAAL  | 42 | 14 | 229 | 5 | 375  | 41.8  | 5.48 | 16761   | 11164.5 | 1.501276 |
| P02750    | Leucine-ric MSSWSRQ    | 28 | 9  | 294 | 9 | 347  | 38.2  | 6.95 | 12613   | 19100   | 0.660366 |
| Q96TA2    | ATP-depen MFSLSTVC     | 1  | 1  | 1   | 1 | 773  | 86.4  | 8.76 | 108.6   | 165.7   | 0.655401 |
| J3KR56    | Receptor a METGALRF    | 4  | 1  | 4   | 1 | 151  | 16.8  | 5.48 | 329.3   | 510.1   | 0.64556  |
| B2R7Z2    | cDNA, FLJ9 MPRQLSAF    | 5  | 2  | 3   | 2 | 416  | 44.3  | 8.41 | 183.6   | 286.3   | 0.641285 |
| B7ZLW2    | HELZ prote MEDRRAEF    | 1  | 1  | 2   | 1 | 1943 | 219   | 7.42 | 15.4    | 24.3    | 0.633745 |
| P55000    | Secreted L MASRWAV     | 61 | 3  | 21  | 3 | 103  | 11.2  | 5.33 | 419.5   | 663.4   | 0.632349 |
| Q9Y5Y7    | Lymphatic MARCFSLV     | 18 | 6  | 249 | 6 | 322  | 35.2  | 8.28 | 13497.1 | 22274.4 | 0.605947 |
| Q9UBC9    | Small proli MSSYQKQC   | 71 | 8  | 121 | 8 | 169  | 18.1  | 8.57 | 5390.1  | 9233.8  | 0.583736 |
| P31151    | Protein S1( MSNTQAEF   | 34 | 3  | 35  | 3 | 101  | 11.5  | 6.77 | 956.5   | 1722.6  | 0.555265 |
| A0A0S2Z4F | Secretoglo MKLAVTLT    | 20 | 3  | 114 | 3 | 91   | 10    | 5.06 | 5373.7  | 13735   | 0.391241 |

| Uniprot<br>Accession<br>Number | Protein<br>name       | Protein<br>amino acid<br>sequence<br>degree(%) | The<br>number of<br>peptides<br>identified | The total<br>number of<br>times a<br>polypepti<br>de was<br>identified | The<br>number of<br>characteri<br>peptides<br>identified | Amino<br>acid length | KDa   | isoelectric<br>point | relative<br>abundanc<br>e of<br>normalize<br>d protein -<br>control |               |                |
|--------------------------------|-----------------------|------------------------------------------------|--------------------------------------------|------------------------------------------------------------------------|----------------------------------------------------------|----------------------|-------|----------------------|---------------------------------------------------------------------|---------------|----------------|
|                                |                       |                                                |                                            |                                                                        |                                                          |                      |       |                      | sample<br>114                                                       | sample<br>121 | ratio(114/121) |
| Q16661                         | Guanylate MGCRAAS     | 12                                             | 1                                          | 9                                                                      | 1                                                        | 112                  | 12.1  | 6.48                 | 255.4                                                               | 58.1          | 4.395869       |
| P36980                         | Compleme MWLLVSVI     | 26                                             | 6                                          | 33                                                                     | 3                                                        | 270                  | 30.6  | 6.38                 | 423.3                                                               | 120.1         | 3.524563       |
| Q03164                         | Histone-lys MAHSCRW   | 0                                              | 1                                          | 10                                                                     | 1                                                        | 3969                 | 431.5 | 9.09                 | 2094.7                                                              | 606.1         | 3.45603        |
| O94967                         | WD repeat MTAEETVN    | 1                                              | 1                                          | 3                                                                      | 1                                                        | 919                  | 101.9 | 5.94                 | 384.9                                                               | 112.6         | 3.418295       |
| B4EOX1                         | Beta-2-mic MSRSVALA   | 27                                             | 4                                          | 110                                                                    | 4                                                        | 122                  | 13.9  | 7.44                 | 27383.9                                                             | 8163.5        | 3.354431       |
| Q5HYA8                         | Meckelin C MATRGGAI   | 2                                              | 1                                          | 3                                                                      | 1                                                        | 995                  | 111.7 | 6.77                 | 60.4                                                                | 21.4          | 2.82243        |
| Q9Y3R5                         | Protein do MDPEEQEL   | 0                                              | 1                                          | 1                                                                      | 1                                                        | 2298                 | 258.1 | 6.29                 | 52.7                                                                | 18.7          | 2.818182       |
| A8K7G6                         | cDNA FLJ7 MAQTSSYF    | 55                                             | 9                                          | 294                                                                    | 7                                                        | 166                  | 18.7  | 5.53                 | 67081.8                                                             | 24072.4       | 2.786669       |
| Q9UL81                         | Myosin-re DIQMTQSP    | 51                                             | 3                                          | 104                                                                    | 2                                                        | 107                  | 11.5  | 8.48                 | 62.8                                                                | 23.2          | 2.706897       |
| P13797                         | Plastin-3 O MDEMATT   | 9                                              | 6                                          | 20                                                                     | 3                                                        | 630                  | 70.8  | 5.6                  | 101.6                                                               | 38.2          | 2.659686       |
| A0A024R8                       | Ubiquitinyl MARMGDS   | 1                                              | 1                                          | 2                                                                      | 1                                                        | 916                  | 102.2 | 6.21                 | 107.2                                                               | 41.4          | 2.589372       |
| S6BAP4                         | IgG H chair MDWTWRI   | 22                                             | 4                                          | 123                                                                    | 1                                                        | 275                  | 29.4  | 8.51                 | 36.7                                                                | 14.6          | 2.513699       |
| A0A075B6                       | Ig lambda- XQPKAAPS   | 48                                             | 4                                          | 1262                                                                   | 1                                                        | 106                  | 11.3  | 8.29                 | 314.6                                                               | 126.3         | 2.490895       |
| H9KV90                         | SH3 and m MTHSPATS    | 0                                              | 1                                          | 1                                                                      | 1                                                        | 2169                 | 225.8 | 8.34                 | 59.1                                                                | 24.1          | 2.452282       |
| Q6ICS1                         | Putative ur MAQTNSFF  | 24                                             | 3                                          | 114                                                                    | 1                                                        | 166                  | 18.7  | 5.95                 | 68.7                                                                | 30.7          | 2.237785       |
| P81605                         | Dermcidin MRFMTLLF    | 10                                             | 1                                          | 10                                                                     | 1                                                        | 110                  | 11.3  | 6.54                 | 1243.9                                                              | 563.4         | 2.207845       |
| Q02747                         | Guanylin O MNAFLLSA   | 18                                             | 3                                          | 55                                                                     | 3                                                        | 115                  | 12.4  | 4.59                 | 6099.4                                                              | 2797.1        | 2.180616       |
| H3BQD0                         | Cerebellin- MLGVLELLI | 11                                             | 1                                          | 8                                                                      | 1                                                        | 140                  | 14.7  | 5.48                 | 722.6                                                               | 333           | 2.16997        |
| P02753                         | Retinol-bin MKWVWA    | 61                                             | 10                                         | 470                                                                    | 10                                                       | 201                  | 23    | 6.07                 | 58084.3                                                             | 26946         | 2.155582       |
| Q9ULL1                         | Pleckstrin I MELSDSDR | 1                                              | 1                                          | 8                                                                      | 1                                                        | 1385                 | 155.3 | 6.24                 | 833.4                                                               | 396.8         | 2.100302       |
| A0A075B6                       | Protein IG MDMRVPA    | 14                                             | 1                                          | 2                                                                      | 1                                                        | 117                  | 12.7  | 9.25                 | 41.8                                                                | 20.1          | 2.079602       |
| V9HW48                         | SH3 domai MVIRVYIAS   | 35                                             | 3                                          | 13                                                                     | 3                                                        | 114                  | 12.8  | 5.25                 | 114.7                                                               | 56.2          | 2.040925       |
| Q15828                         | Cystatin-M MARSNLPL   | 50                                             | 5                                          | 278                                                                    | 5                                                        | 149                  | 16.5  | 8.09                 | 14974.4                                                             | 7481.9        | 2.001417       |
| Q9Y546                         | Leucine-ric MSYYLSSEI | 3                                              | 1                                          | 6                                                                      | 1                                                        | 428                  | 48.5  | 7.46                 | 771.1                                                               | 408           | 1.889951       |
| B2RAF9                         | Suppressor MGSDRARI   | 2                                              | 1                                          | 1                                                                      | 1                                                        | 855                  | 94.7  | 6.52                 | 61.9                                                                | 33.1          | 1.870091       |

|          |                                     |    |    |      |    |      |       |       |          |          |          |
|----------|-------------------------------------|----|----|------|----|------|-------|-------|----------|----------|----------|
| P01704   | Immunoglobulin MAWALLLI             | 13 | 1  | 5    | 1  | 120  | 12.6  | 6.49  | 454.4    | 246.2    | 1.845654 |
| A0A087WU | ADP-ribosyl MSDLRITEA               | 6  | 1  | 1    | 1  | 204  | 22.9  | 5.63  | 58.9     | 32       | 1.840625 |
| Q96NL6   | Sodium channel MAAEIDFLI            | 1  | 1  | 3    | 1  | 688  | 80.9  | 6.07  | 364.1    | 199.9    | 1.821411 |
| P00915   | Carbonic anhydrase MASPDWG          | 18 | 4  | 31   | 4  | 261  | 28.9  | 7.12  | 1485.8   | 816.3    | 1.820164 |
| Q9NWW4   | UPF0587 protein MGKIALQL            | 16 | 2  | 3    | 2  | 160  | 18    | 5.01  | 373.2    | 206.9    | 1.80377  |
| B4E1Z4   | cDNA FLJ51 MGPLMVL                  | 18 | 17 | 125  | 3  | 1266 | 140.9 | 7.18  | 7433.3   | 4174.9   | 1.780474 |
| A0A0X9UW | MS-B1 light chain DIQMTQSP          | 32 | 2  | 101  | 1  | 107  | 11.5  | 7.96  | 19.9     | 11.2     | 1.776786 |
| Q86YT9   | Junctional protein MFCPLKLLI        | 5  | 2  | 3    | 2  | 394  | 44.3  | 7.12  | 180      | 101.9    | 1.766438 |
| Q9BUD6   | Spondin-2 MENPSPA                   | 5  | 2  | 2    | 2  | 331  | 35.8  | 5.52  | 153      | 86.9     | 1.760644 |
| P13521   | Secretogranin MAEAKTH               | 2  | 1  | 2    | 1  | 617  | 70.9  | 4.75  | 232.1    | 132.3    | 1.754346 |
| Q86SQ8   | Beta-defensin GNFLTGLG              | 21 | 1  | 13   | 1  | 47   | 5.1   | 8.73  | 470.9    | 268.5    | 1.753818 |
| A2NUT2   | Lambda chain MTCSPLLL               | 38 | 9  | 1468 | 3  | 235  | 24.6  | 7.62  | 177227.2 | 101417.1 | 1.747508 |
| P20142   | Gastricsin (MKWMVV)                 | 2  | 1  | 2    | 1  | 388  | 42.4  | 4.46  | 137      | 78.6     | 1.743003 |
| B6V6K6   | Mutant myosin MRFFCARC              | 2  | 1  | 2    | 1  | 504  | 57    | 5.54  | 434.3    | 251.9    | 1.724097 |
| A2N2F4   | VK3 protein LTQSPGTL                | 8  | 1  | 15   | 1  | 108  | 11.9  | 9.51  | 491.3    | 285.9    | 1.718433 |
| B2R4R0   | Histone H4 MSGRGKG                  | 50 | 5  | 58   | 5  | 103  | 11.4  | 11.36 | 2510.2   | 1469.8   | 1.707851 |
| K7ES00   | Histone H3 MARTKQT                  | 9  | 2  | 8    | 2  | 151  | 16.6  | 11.84 | 1016.6   | 602.6    | 1.687023 |
| A0A1K0FU | Globin E1 (MLSAQERA)                | 11 | 1  | 1    | 1  | 141  | 15.6  | 6.62  | 13.1     | 7.8      | 1.679487 |
| A0A0U1RR | Histone H2 MSGRGKQ                  | 14 | 3  | 13   | 3  | 170  | 18.5  | 11.52 | 1004.6   | 601.7    | 1.669603 |
| P07737   | Profilin-1 C MAGWNA                 | 63 | 7  | 73   | 7  | 140  | 15    | 8.27  | 4969.7   | 2994     | 1.659886 |
| Q86YD5   | Low-density lipoprotein MWLLGPL     | 5  | 1  | 1    | 1  | 345  | 37.4  | 4.87  | 17.7     | 10.8     | 1.638889 |
| Q5FWF9   | IGL@ protein MAWTPLLI               | 42 | 8  | 690  | 3  | 232  | 24.8  | 5.59  | 5027.3   | 3111.9   | 1.615508 |
| P06727   | Apolipoprotein MFLKAVVL             | 54 | 21 | 120  | 21 | 396  | 45.4  | 5.38  | 8534.3   | 5285.4   | 1.614693 |
| Q6IB39   | RNASE6 protein MVLCFPLLI            | 19 | 2  | 12   | 2  | 150  | 17.2  | 8.76  | 500.5    | 310.4    | 1.612436 |
| A8K6Z6   | cDNA FLJ71 MKPNIIIFVL               | 43 | 21 | 144  | 15 | 582  | 65.6  | 9.07  | 4746.6   | 2968.1   | 1.599205 |
| B4DI63   | cDNA FLJ51 MLAKISTTV                | 3  | 1  | 1    | 1  | 356  | 40.5  | 7.99  | 242.1    | 151.7    | 1.595913 |
| O94991   | SLIT and Nogo MHTCCPPV              | 1  | 1  | 4    | 1  | 958  | 107.4 | 6.95  | 156.6    | 98.7     | 1.586626 |
| A0A024R8 | Prostaglandin synthase MATHHTLV     | 41 | 6  | 3425 | 6  | 190  | 21    | 7.8   | 249501.5 | 157265.4 | 1.5865   |
| B2R7Z2   | cDNA, FLJ9 MPRQLSA                  | 5  | 2  | 3    | 2  | 416  | 44.3  | 8.41  | 453.3    | 286.3    | 1.583304 |
| C0JYY2   | Apolipoprotein MDPPRPAL             | 1  | 3  | 5    | 3  | 4563 | 515.2 | 7.05  | 64       | 40.5     | 1.580247 |
| P02763   | Alpha-1-acid glycoprotein MALS WVLI | 40 | 7  | 965  | 5  | 201  | 23.5  | 5.02  | 76375    | 48390.7  | 1.578299 |
| P04279   | Semenogelin MKPNIIIFVL              | 53 | 23 | 236  | 17 | 462  | 52.1  | 9.29  | 19411.5  | 12317.9  | 1.575877 |
| Q6GMV8   | Uncharacterized protein MAWTVLLI    | 42 | 8  | 1402 | 1  | 234  | 24.9  | 6.67  | 6709.7   | 4273.6   | 1.570035 |

|          |                        |    |    |      |    |      |       |       |          |          |          |
|----------|------------------------|----|----|------|----|------|-------|-------|----------|----------|----------|
| A8K0T9   | cDNA FLJ7: MADFDDR'    | 17 | 3  | 6    | 2  | 286  | 32.9  | 5.69  | 374.5    | 238.9    | 1.567602 |
| B4E1C2   | Kininogen : MKLITILFLC | 36 | 27 | 3259 | 1  | 644  | 71.9  | 6.81  | 263.2    | 167.9    | 1.5676   |
| P25311   | Zinc-alpha- MVRMVPV    | 60 | 20 | 1734 | 20 | 298  | 34.2  | 6.05  | 236874.5 | 151729.7 | 1.561161 |
| P29401   | Transketol: MESYHKPC   | 5  | 2  | 3    | 2  | 623  | 67.8  | 7.66  | 153.2    | 98.4     | 1.556911 |
| Q0ZCJ2   | Immunglob LVQLVESG     | 46 | 5  | 89   | 1  | 124  | 13.6  | 7.93  | 37.4     | 24.3     | 1.539095 |
| B0YIW2   | Apolipoprc MGTWGAF     | 29 | 3  | 12   | 3  | 117  | 12.8  | 8.18  | 823      | 535.4    | 1.537168 |
| P02545   | Prelamin-A METPSQRF    | 2  | 1  | 1    | 1  | 664  | 74.1  | 7.02  | 98.4     | 64.1     | 1.535101 |
| B2R888   | Monocyte MERASCLL      | 35 | 12 | 411  | 12 | 375  | 40    | 6.23  | 34324.4  | 22517.1  | 1.52437  |
| A0A024RC | CD99 antig MVAWRSA     | 6  | 1  | 4    | 1  | 262  | 28    | 5.14  | 144.2    | 94.6     | 1.524313 |
| A0A024R9 | Serpin pep MYSNVIGT    | 36 | 16 | 193  | 16 | 464  | 52.6  | 6.71  | 9396.9   | 6197     | 1.516363 |
| B7Z8Q2   | cDNA FLJ5: MFAGCFFF    | 24 | 10 | 409  | 10 | 433  | 46.6  | 6.28  | 47211    | 31137.6  | 1.516205 |
| P30101   | Protein dis MRLRRAL    | 2  | 1  | 2    | 1  | 505  | 56.7  | 6.35  | 50       | 33       | 1.515152 |
| Q86TD4   | Sarcalumei MRALVLLG    | 1  | 1  | 1    | 1  | 932  | 100.7 | 4.4   | 93.1     | 61.5     | 1.513821 |
| A6XMV9   | Protease si MNLLLILTF  | 15 | 3  | 5    | 1  | 261  | 28    | 5.14  | 144      | 95.5     | 1.507853 |
| P59665   | Neutrophil MRTLAILA/   | 19 | 2  | 29   | 2  | 94   | 10.2  | 6.99  | 2632.3   | 1746.8   | 1.506927 |
| P46781   | 40S riboso MPVARSW     | 5  | 1  | 1    | 1  | 194  | 22.6  | 10.65 | 139.9    | 93.2     | 1.501073 |
| Q400G7   | B and T lyn MKTLPAMI   | 7  | 1  | 4    | 1  | 289  | 32.8  | 6.34  | 71       | 106.5    | 0.666667 |
| A0A024R6 | Delta-like 1 MTATEALL  | 11 | 3  | 41   | 3  | 383  | 41.2  | 5.53  | 4701.3   | 7066.9   | 0.665256 |
| P09564   | T-cell antig MAGPPRL   | 10 | 2  | 36   | 2  | 240  | 25.4  | 7.27  | 178.6    | 271.3    | 0.658312 |
| Q6N030   | Uncharact MDWTWRI      | 37 | 15 | 1075 | 6  | 518  | 57    | 8.05  | 4738.1   | 7211.3   | 0.657038 |
| P13645   | Keratin, tyj MSVRYSSSI | 31 | 18 | 186  | 13 | 584  | 58.8  | 5.21  | 7528.5   | 11461.9  | 0.656828 |
| M1VKI3   | Tyrosine-ph MAPARLFA   | 7  | 4  | 46   | 4  | 746  | 83.1  | 4.97  | 1882.6   | 2867     | 0.656645 |
| Q05D71   | TNFRSF10C MARIPKTLI    | 3  | 1  | 2    | 1  | 277  | 29.7  | 8.4   | 402.3    | 615.2    | 0.653934 |
| Q68CJ9   | Cyclic AMP MNTDLAAC    | 7  | 2  | 39   | 2  | 461  | 49    | 5.15  | 1292.7   | 1983.8   | 0.651628 |
| Q5T1S8   | Noncompa MTTATPLG      | 7  | 1  | 16   | 1  | 102  | 11.1  | 9.86  | 1819.3   | 2795.3   | 0.650842 |
| P35908   | Keratin, tyj MSCQISCK' | 17 | 11 | 66   | 5  | 639  | 65.4  | 8     | 575.3    | 884.5    | 0.650424 |
| Q5T2L0   | V-set dom: MVLLTSRV    | 6  | 2  | 18   | 2  | 285  | 31.2  | 5.99  | 624.6    | 960.5    | 0.650286 |
| P02743   | Serum amy MNKPLLWI     | 16 | 3  | 18   | 3  | 223  | 25.4  | 6.54  | 727.3    | 1124.2   | 0.646949 |
| Q59FG9   | Chondroitil IFPPNCNKF  | 1  | 3  | 13   | 2  | 3410 | 374.1 | 4.53  | 334.5    | 517.4    | 0.646502 |
| Q9HC84   | Mucin-5B ( MGAPSACF    | 2  | 4  | 11   | 4  | 5762 | 596   | 6.64  | 529.5    | 821.2    | 0.644788 |
| P13473   | Lysosome- MVCFRLFP'    | 7  | 3  | 113  | 3  | 410  | 44.9  | 5.63  | 5745.4   | 8958.6   | 0.641328 |
| P01258   | Calcitonin ( MGFAQKFSF | 13 | 2  | 2    | 2  | 141  | 15.5  | 6.52  | 256.4    | 403.3    | 0.635755 |
| Q6LAM1   | Heavy chai KVITYTSQEI  | 45 | 12 | 123  | 1  | 321  | 35.9  | 7.59  | 172.8    | 272.9    | 0.633199 |



|           |                       |    |    |      |    |      |       |      |         |          |          |
|-----------|-----------------------|----|----|------|----|------|-------|------|---------|----------|----------|
| P05543    | Thyroxine- MSPFLYLVI  | 31 | 13 | 123  | 13 | 415  | 46.3  | 6.3  | 6472.1  | 10225    | 0.632968 |
| B5TMG5    | Histidine ri MGHHRPV  | 1  | 1  | 5    | 1  | 750  | 86.2  | 4.75 | 401.1   | 636.8    | 0.629868 |
| Q6UX06    | Olfactomei MRPGLSFL   | 21 | 10 | 125  | 10 | 510  | 57.2  | 5.69 | 4025.9  | 6418.7   | 0.627214 |
| A0A024R2I | Cysteine-ri MAPWPPK   | 5  | 2  | 4    | 2  | 420  | 45.4  | 4.87 | 33.9    | 54.1     | 0.626617 |
| Q99835    | Smoothenr MAAARPAI    | 1  | 1  | 4    | 1  | 787  | 86.3  | 8.34 | 222.3   | 361.7    | 0.614598 |
| O43653    | Prostate st MKAVLLAL  | 22 | 2  | 164  | 2  | 123  | 12.9  | 5.29 | 8903    | 14644.6  | 0.607937 |
| P51170    | Amiloride-: MAPGEKIK  | 4  | 2  | 8    | 2  | 649  | 74.2  | 7.5  | 270.6   | 446.9    | 0.605505 |
| P04746    | Pancreatic MKFFLLLF   | 53 | 20 | 829  | 3  | 511  | 57.7  | 7.05 | 1554.5  | 2613.9   | 0.594705 |
| A0A096LNI | Uncharactr MALTKMLI   | 6  | 1  | 6    | 1  | 201  | 23.3  | 9.38 | 160.6   | 272.3    | 0.589791 |
| J3KPA1    | Cysteine-ri MKQILHPA  | 13 | 2  | 12   | 2  | 276  | 31    | 7.61 | 678.2   | 1153.4   | 0.588001 |
| Q6N092    | Putative ur GEEPSTRSF | 34 | 14 | 1008 | 1  | 519  | 56.4  | 6.93 | 170.6   | 292.1    | 0.584047 |
| A0A024RD  | Secreted p MRIAVICFC  | 50 | 13 | 1136 | 2  | 314  | 35.4  | 4.58 | 41336.7 | 70922.1  | 0.582847 |
| P12319    | High affinit MAPAMES  | 3  | 1  | 1    | 1  | 257  | 29.6  | 6.68 | 73.3    | 127.2    | 0.576258 |
| B2RDY9    | Adenylyl cy MADMQNI   | 4  | 2  | 2    | 2  | 475  | 51.6  | 8.22 | 156.3   | 273.4    | 0.57169  |
| Q8NG20    | Plasminoge: MSEGNSDC  | 14 | 2  | 6    | 2  | 90   | 9.8   | 7.14 | 103.2   | 180.8    | 0.570796 |
| P24855    | Deoxyribor MRGMKLLI   | 23 | 5  | 348  | 5  | 282  | 31.4  | 4.91 | 10550.1 | 19469.6  | 0.541876 |
| Q96TA2    | ATP-depen MFSLSTVC    | 1  | 1  | 1    | 1  | 773  | 86.4  | 8.76 | 85.8    | 165.7    | 0.517803 |
| B2R7D1    | cDNA, FLJ9 MMDASKE    | 2  | 2  | 7    | 2  | 684  | 77.1  | 6.76 | 20.2    | 39.4     | 0.51269  |
| A0A1B0GU  | Uncharactr MYGDIFNA   | 13 | 1  | 1    | 1  | 103  | 10.9  | 8.92 | 14.2    | 27.8     | 0.510791 |
| Q5IWS5    | Intelectin 1 MNQLSFL  | 16 | 4  | 13   | 4  | 313  | 35    | 5.82 | 403     | 793.9    | 0.507621 |
| Q13790    | Apolipoprc MTGLCGYS   | 4  | 1  | 6    | 1  | 326  | 35.4  | 5.64 | 116.9   | 235.1    | 0.497235 |
| Q8N4F0    | BPI fold-co MAWASRLI  | 7  | 3  | 15   | 3  | 458  | 49.1  | 8.72 | 482     | 975      | 0.494359 |
| X6RBG4    | Uromoduli MRHIMTRI    | 39 | 23 | 3450 | 23 | 689  | 75.6  | 5.87 | 169355  | 364524.4 | 0.464592 |
| P31151    | Protein S1( MSNTQAEF  | 34 | 3  | 35   | 3  | 101  | 11.5  | 6.77 | 741.2   | 1722.6   | 0.43028  |
| Q96AX9    | E3 ubiquiti MGWKPSE   | 1  | 1  | 4    | 1  | 1013 | 109.9 | 8.44 | 28.5    | 88.1     | 0.323496 |

| Uniprot<br>Accession<br>Number | Protein<br>name | Protein<br>amino acid<br>sequence<br>degree(%) | The<br>number of<br>peptides<br>identified | The total<br>number of<br>times a<br>polypepti<br>de was<br>identified | The<br>number of<br>characteri<br>peptides<br>identified | Amino<br>acid length<br>KDa | isoelectric<br>point | relative<br>abundanc<br>e of<br>normalize<br>d protein -<br>control<br>sample<br>115 | relative<br>abundanc<br>e of<br>normalize<br>d protein -<br>control<br>sample<br>121 | ratio(115/121) |          |          |
|--------------------------------|-----------------|------------------------------------------------|--------------------------------------------|------------------------------------------------------------------------|----------------------------------------------------------|-----------------------------|----------------------|--------------------------------------------------------------------------------------|--------------------------------------------------------------------------------------|----------------|----------|----------|
|                                |                 |                                                |                                            |                                                                        |                                                          |                             |                      |                                                                                      |                                                                                      |                |          |          |
| P02768                         | Serum albu      | MKWVTFIS                                       | 73                                         | 56                                                                     | 9971                                                     | 56                          | 609                  | 69.3                                                                                 | 6.28                                                                                 | 2220421        | 666397.2 | 3.331978 |
| B3KV71                         | cDNA FLJ11      | MLQLSEFD                                       | 1                                          | 1                                                                      | 1                                                        | 1                           | 831                  | 92.6                                                                                 | 7.42                                                                                 | 137.5          | 45.8     | 3.002183 |
| A0A024R6I                      | Alpha-1-an      | MPSSVSWC                                       | 53                                         | 24                                                                     | 629                                                      | 1                           | 418                  | 46.7                                                                                 | 5.59                                                                                 | 80233.1        | 30932.8  | 2.593787 |
| B2R6Q2                         | Alkaline ph     | MISPFLVLA                                      | 2                                          | 1                                                                      | 2                                                        | 1                           | 524                  | 57.2                                                                                 | 6.57                                                                                 | 30.9           | 12       | 2.575    |
| B4E1B2                         | cDNA FLJ5       | MRLAVGAL                                       | 62                                         | 43                                                                     | 1716                                                     | 3                           | 678                  | 74.8                                                                                 | 7.12                                                                                 | 199640.4       | 78511.8  | 2.542808 |
| A0A0K0K1I                      | Epididymis      | MRLAVGAL                                       | 58                                         | 42                                                                     | 1721                                                     | 2                           | 698                  | 77                                                                                   | 7.21                                                                                 | 8496.1         | 3358.1   | 2.530032 |
| A0A1B1CYI                      | Vitamin D I     | LAERLKAKL                                      | 32                                         | 1                                                                      | 8                                                        | 1                           | 34                   | 3.7                                                                                  | 8.56                                                                                 | 867.1          | 346.4    | 2.503176 |
| E9KL23                         | Epididymis      | MPSSVSWC                                       | 53                                         | 24                                                                     | 660                                                      | 1                           | 418                  | 46.7                                                                                 | 5.59                                                                                 | 4131.1         | 1716     | 2.407401 |
| A8K669                         | cDNA FLJ7       | MVWKVAV                                        | 4                                          | 1                                                                      | 3                                                        | 1                           | 433                  | 49.4                                                                                 | 6.55                                                                                 | 69.4           | 30.4     | 2.282895 |
| H3BSR6                         | Fractalkine     | MAPISLSW                                       | 3                                          | 1                                                                      | 1                                                        | 1                           | 403                  | 42.7                                                                                 | 6.52                                                                                 | 178.5          | 81.4     | 2.192875 |
| A0A024QZ                       | NAD(P)H d       | MAGKKVLI                                       | 4                                          | 1                                                                      | 1                                                        | 1                           | 231                  | 25.9                                                                                 | 6.29                                                                                 | 137.6          | 66.2     | 2.07855  |
| Q96NL6                         | Sodium ch       | MAAEIDFLI                                      | 1                                          | 1                                                                      | 3                                                        | 1                           | 688                  | 80.9                                                                                 | 6.07                                                                                 | 401.2          | 199.9    | 2.007004 |
| B3KTQ4                         | Hexosyltra      | MASALWT                                        | 3                                          | 1                                                                      | 1                                                        | 1                           | 331                  | 39.4                                                                                 | 7.97                                                                                 | 210.4          | 107.7    | 1.953575 |
| A0A024R3I                      | Apolipoprc      | MKAAVLTL                                       | 60                                         | 16                                                                     | 172                                                      | 16                          | 267                  | 30.8                                                                                 | 5.76                                                                                 | 10752.4        | 5583.4   | 1.92578  |
| Q5HYA8                         | Meckelin C      | MATRGGA                                        | 2                                          | 1                                                                      | 3                                                        | 1                           | 995                  | 111.7                                                                                | 6.77                                                                                 | 41.1           | 21.4     | 1.920561 |
| A0A024R8                       | Ubiquitinyl     | MARMGDS                                        | 1                                          | 1                                                                      | 2                                                        | 1                           | 916                  | 102.2                                                                                | 6.21                                                                                 | 78.8           | 41.4     | 1.903382 |
| A2NZ55                         | Variable ir     | QVQLQESC                                       | 31                                         | 3                                                                      | 66                                                       | 1                           | 131                  | 13.9                                                                                 | 8.79                                                                                 | 193.1          | 102.9    | 1.876579 |
| P13688                         | Carcinoem       | MGHLSAPL                                       | 5                                          | 2                                                                      | 27                                                       | 1                           | 526                  | 57.5                                                                                 | 5.97                                                                                 | 145            | 77.3     | 1.875809 |
| P30039                         | Phenazine       | MKLPIFIAD                                      | 10                                         | 2                                                                      | 5                                                        | 2                           | 288                  | 31.8                                                                                 | 6.52                                                                                 | 286.2          | 152.6    | 1.875491 |
| V9HWA9                         | Epididymis      | MGPTSGPS                                       | 35                                         | 55                                                                     | 305                                                      | 55                          | 1663                 | 187                                                                                  | 6.4                                                                                  | 19834.7        | 10679.9  | 1.857199 |
| D3DRR6                         | Inter-alpha     | MKRLTCFFI                                      | 5                                          | 4                                                                      | 10                                                       | 4                           | 947                  | 106.5                                                                                | 6.95                                                                                 | 459.8          | 249.7    | 1.84141  |
| Q9Y3R5                         | Protein doj     | MDPEEQEL                                       | 0                                          | 1                                                                      | 1                                                        | 1                           | 2298                 | 258.1                                                                                | 6.29                                                                                 | 33.8           | 18.7     | 1.807487 |
| P02545                         | Prelamin-A      | METPSQRF                                       | 2                                          | 1                                                                      | 1                                                        | 1                           | 664                  | 74.1                                                                                 | 7.02                                                                                 | 115.4          | 64.1     | 1.800312 |
| A0A024R9                       | Serpin pep      | MYSNVIGT                                       | 36                                         | 16                                                                     | 193                                                      | 16                          | 464                  | 52.6                                                                                 | 6.71                                                                                 | 10940.4        | 6197     | 1.765435 |
| A6NL88                         | Protein shi     | MPALLLLVI                                      | 2                                          | 1                                                                      | 1                                                        | 1                           | 538                  | 56.2                                                                                 | 10.02                                                                                | 133            | 75.4     | 1.763926 |

|          |              |            |    |    |      |    |      |       |       |         |         |          |
|----------|--------------|------------|----|----|------|----|------|-------|-------|---------|---------|----------|
| D6RF35   | Vitamin D-   | MKRVLVLL   | 53 | 23 | 262  | 23 | 476  | 53    | 5.52  | 24489.9 | 14294.4 | 1.713251 |
| A0A1K0FU | Globin E1 (  | MLSAQERA   | 11 | 1  | 1    | 1  | 141  | 15.6  | 6.62  | 13.3    | 7.8     | 1.705128 |
| P30047   | GTP cycloh   | MPYLLISTC  | 40 | 2  | 23   | 2  | 84   | 9.7   | 6.54  | 400.7   | 235.6   | 1.700764 |
| Q8WWQ8   | Stabilin-2 ( | MMLQHLV    | 0  | 1  | 1    | 1  | 2551 | 276.8 | 6.4   | 19.7    | 11.6    | 1.698276 |
| B4E1C2   | Kininogen (  | MKLITILFLC | 36 | 27 | 3259 | 1  | 644  | 71.9  | 6.81  | 278     | 167.9   | 1.655747 |
| V9HW48   | SH3 domai    | MVIRVYIAS  | 35 | 3  | 13   | 3  | 114  | 12.8  | 5.25  | 92.2    | 56.2    | 1.640569 |
| F1T0L0   | LY6/PLAUR    | MRGTRLAL   | 11 | 1  | 8    | 1  | 125  | 13.1  | 5.96  | 474.9   | 291.3   | 1.630278 |
| A0A075B6 | Protein IG   | MDMRVPA    | 14 | 1  | 2    | 1  | 117  | 12.7  | 9.25  | 32.6    | 20.1    | 1.621891 |
| A0N5G7   | Rheumatoi    | GGGVVQP    | 9  | 1  | 1    | 1  | 119  | 13    | 8.94  | 141.9   | 88.1    | 1.61067  |
| P43652   | Afamin OS    | MKLLKLTGI  | 21 | 13 | 95   | 13 | 599  | 69    | 5.9   | 9319.1  | 5833.9  | 1.597405 |
| P51606   | N-acylgluc   | MSKGLPAR   | 3  | 1  | 2    | 1  | 427  | 48.8  | 6.37  | 88.8    | 55.8    | 1.591398 |
| C0JYY2   | Apolipoprc   | MDPPRPAL   | 1  | 3  | 5    | 3  | 4563 | 515.2 | 7.05  | 64.4    | 40.5    | 1.590123 |
| A0A087W  | ST3 beta-g   | MWQAPRE    | 2  | 1  | 1    | 1  | 384  | 43.4  | 8.92  | 72.8    | 45.8    | 1.58952  |
| S6BAP4   | IgG H chair  | MDWTWRI    | 22 | 4  | 123  | 1  | 275  | 29.4  | 8.51  | 23.2    | 14.6    | 1.589041 |
| A0A125U0 | MS-C3 ligh   | DIQMTQSP   | 17 | 1  | 1    | 1  | 106  | 11.4  | 4.83  | 155.7   | 98.8    | 1.575911 |
| Q96KP4   | Cytosolic n  | MAALTTLF   | 24 | 8  | 29   | 8  | 475  | 52.8  | 5.97  | 968.5   | 620     | 1.562097 |
| P18085   | ADP-ribosy   | MGLTISSLF  | 6  | 1  | 1    | 1  | 180  | 20.5  | 7.14  | 32.1    | 20.6    | 1.558252 |
| P12724   | Eosinophil   | MVPKLFTS   | 17 | 2  | 5    | 2  | 160  | 18.4  | 10.02 | 119.5   | 77.9    | 1.534018 |
| A0A125U0 | GCT-A2 he    | EVQLVESG   | 15 | 1  | 18   | 1  | 126  | 13.8  | 5.45  | 176.5   | 115.8   | 1.52418  |
| P68371   | Tubulin be   | MREIVHLQ   | 11 | 4  | 10   | 4  | 445  | 49.8  | 4.89  | 35.9    | 23.6    | 1.521186 |
| Q96IY4   | Carboxype    | MKLCSLAV   | 2  | 1  | 2    | 1  | 423  | 48.4  | 7.71  | 42      | 27.9    | 1.505376 |
| A0A0X9U  | MS-B1 ligh   | DIQMTQSP   | 32 | 2  | 101  | 1  | 107  | 11.5  | 7.96  | 16.8    | 11.2    | 1.5      |
| P49908   | Selenoprot   | MWRSLGL    | 4  | 2  | 12   | 2  | 381  | 43.2  | 7.87  | 674.7   | 1007.4  | 0.669744 |
| Q8NES3   | Beta-1,3-N   | MLKRCGRF   | 7  | 1  | 2    | 1  | 379  | 41.7  | 9.17  | 31.8    | 47.5    | 0.669474 |
| P22792   | Carboxype    | MLPGAWL    | 22 | 11 | 195  | 11 | 545  | 60.5  | 5.99  | 6103.8  | 9129.5  | 0.66858  |
| B1AH90   | Signal pept  | MGAAAVR    | 9  | 2  | 5    | 2  | 347  | 37.3  | 5.71  | 79.4    | 118.8   | 0.66835  |
| Q53H88   | Dynactin 2   | MADPKYAI   | 2  | 1  | 4    | 1  | 406  | 44.8  | 5.12  | 67.6    | 101.2   | 0.667984 |
| B7ZW00   | COL6A3 pr    | MRKHRHLF   | 6  | 14 | 120  | 1  | 2570 | 278   | 8.15  | 576.2   | 862.7   | 0.667903 |
| O15144   | Actin-relat  | MILLEVNNI  | 8  | 2  | 2    | 2  | 300  | 34.3  | 7.36  | 58.1    | 87      | 0.667816 |
| Q66K79   | Carboxype    | MPPPLPLLI  | 3  | 2  | 29   | 2  | 652  | 73.6  | 7.97  | 1403.2  | 2103.6  | 0.667047 |
| X5D7A8   | Cell adhesi  | MASVVLPS   | 12 | 5  | 92   | 5  | 471  | 51.5  | 4.87  | 3144.4  | 4714.4  | 0.666978 |
| Q8WW52   | Protein FAI  | MVCREQLS   | 7  | 4  | 17   | 4  | 585  | 64    | 6.67  | 567     | 851.1   | 0.666197 |
| P00995   | Serine prot  | MKVTGIFLI  | 54 | 4  | 91   | 4  | 79   | 8.5   | 7.61  | 3072.8  | 4616.6  | 0.665598 |

|          |                                |    |    |      |    |     |       |      |          |          |          |
|----------|--------------------------------|----|----|------|----|-----|-------|------|----------|----------|----------|
| A0A075B6 | Immunoglobulin MAWALLL         | 25 | 2  | 14   | 2  | 118 | 12.4  | 4.82 | 755.2    | 1136.9   | 0.664262 |
| B2R701   | cDNA, FLJ9 MVELHNL             | 16 | 6  | 45   | 1  | 428 | 45.7  | 5.38 | 20.1     | 30.3     | 0.663366 |
| Q99988   | Growth/differentiation MPGQELR | 8  | 2  | 19   | 2  | 308 | 34.1  | 9.66 | 867.2    | 1308.6   | 0.662693 |
| H0YMD1   | Low-density lipoprotein MGPWGW | 2  | 2  | 13   | 2  | 948 | 104.7 | 5.5  | 819.6    | 1237.7   | 0.662196 |
| M9MML0   | Fc of IgG1c MGGGAGE            | 18 | 6  | 107  | 2  | 290 | 32.7  | 8.1  | 1408.9   | 2128.2   | 0.662015 |
| P04118   | Colipase OMEKILILL             | 7  | 1  | 9    | 1  | 112 | 11.9  | 7.5  | 513.9    | 777.9    | 0.660625 |
| A8K6Q6   | cDNA FLJ78 MLRRRGSP            | 14 | 3  | 13   | 3  | 534 | 57.3  | 4.91 | 553      | 837.3    | 0.660456 |
| Q7Z3B1   | Neuronal glycoprotein MDMMLL   | 42 | 11 | 177  | 11 | 354 | 38.7  | 6.21 | 3566.5   | 5405.1   | 0.65984  |
| Q6P5S8   | IGK@ protein METPAQL           | 47 | 8  | 2911 | 1  | 236 | 25.8  | 6.33 | 121290.3 | 183839.5 | 0.659762 |
| O00526   | Uroplakin-1 MAPLLPIR           | 16 | 2  | 4    | 2  | 184 | 19.4  | 10.4 | 112      | 169.9    | 0.659211 |
| P06703   | Protein S100 MACPLDQ           | 24 | 3  | 32   | 3  | 90  | 10.2  | 5.48 | 1732.2   | 2629.1   | 0.658857 |
| P36957   | Dihydrolipoyl MLRSRCV          | 7  | 3  | 60   | 3  | 453 | 48.7  | 8.95 | 3714.7   | 5668.5   | 0.655323 |
| A9UFC0   | Caspase 14 MSNPRSLE            | 14 | 4  | 10   | 4  | 242 | 27.6  | 5.34 | 178.4    | 272.4    | 0.654919 |
| Q14982   | Opioid-binding MGVCGYLF        | 14 | 4  | 49   | 3  | 345 | 38    | 6.87 | 1148.8   | 1754.3   | 0.654848 |
| A0A0X9V9 | IBM-B2 ligand EIVMTQSP         | 8  | 1  | 6    | 1  | 106 | 11.4  | 6.51 | 191.9    | 293.4    | 0.654056 |
| O95445   | Apolipoprotein MFHQIWA         | 4  | 1  | 8    | 1  | 188 | 21.2  | 6.01 | 231.7    | 354.3    | 0.653966 |
| A8K7G6   | cDNA FLJ78 MAQTSSYF            | 55 | 9  | 294  | 7  | 166 | 18.7  | 5.53 | 15740.4  | 24072.4  | 0.653877 |
| Q14508   | WAP four-disulfide MPACRLGF    | 61 | 4  | 231  | 4  | 124 | 13    | 4.84 | 8609.3   | 13168.2  | 0.653795 |
| A8K6V6   | N-acetylglycine MRLPLAP        | 25 | 13 | 292  | 13 | 552 | 62.1  | 8.4  | 9677.9   | 14806.6  | 0.653621 |
| P08138   | Tumor necrosis MGAGATG         | 9  | 3  | 96   | 3  | 427 | 45.2  | 4.7  | 4209.4   | 6441.7   | 0.653461 |
| A8K7T4   | cDNA FLJ78 MAAEGWI             | 47 | 16 | 724  | 16 | 356 | 40.2  | 6.95 | 37340.5  | 57175.3  | 0.653088 |
| A8K2P8   | cDNA FLJ78 MEAARPSC            | 17 | 14 | 99   | 14 | 901 | 99.9  | 5.34 | 3005.9   | 4611.3   | 0.651855 |
| A0A0E3XJ | E-cadherin MGPWSRS             | 17 | 14 | 408  | 13 | 882 | 97.3  | 4.7  | 19631.3  | 30186.4  | 0.650336 |
| A0A0G2JL | Leukocyte-endothelial MSPHTAL  | 16 | 5  | 135  | 2  | 287 | 31.5  | 5.78 | 7112.7   | 10954.7  | 0.649283 |
| M1VKI3   | Tyrosine phosphatase MAPARLFA  | 7  | 4  | 46   | 4  | 746 | 83.1  | 4.97 | 1857.1   | 2867     | 0.64775  |
| Q8TCT8   | Signal peptide MGPQRRL         | 3  | 1  | 8    | 1  | 520 | 58.1  | 8.32 | 225.6    | 348.3    | 0.647717 |
| A0A024R5 | Folate receptor MAQRMTT        | 31 | 7  | 206  | 7  | 257 | 29.8  | 7.97 | 8645.7   | 13354.9  | 0.64738  |
| Q9NQ36   | Signal peptide MGVAGR          | 3  | 2  | 7    | 2  | 999 | 109.9 | 6.65 | 445.5    | 688.2    | 0.647341 |
| P82980   | Retinol-binding MPPNLTGY       | 7  | 1  | 9    | 1  | 135 | 15.9  | 6.54 | 453.8    | 701.1    | 0.647269 |
| Q15485   | Ficolin-2 OMELDRAVC            | 16 | 6  | 22   | 6  | 313 | 34    | 6.77 | 1371.5   | 2120.4   | 0.646812 |
| Q6UXB8   | Peptidase inhibitor MHGSCSFL   | 17 | 7  | 121  | 2  | 463 | 49.4  | 5.39 | 3273.1   | 5069.6   | 0.645633 |
| P13647   | Keratin, type I MSRQSSVS       | 18 | 11 | 34   | 4  | 590 | 62.3  | 7.74 | 7.1      | 11       | 0.645455 |
| A0A087W  | Neural cell adhesion MLQTKDL   | 11 | 9  | 123  | 9  | 884 | 97.3  | 4.93 | 4723.8   | 7327.9   | 0.644632 |

|          |                        |    |    |      |    |      |       |       |          |          |          |
|----------|------------------------|----|----|------|----|------|-------|-------|----------|----------|----------|
| Q7KYR7   | Butyrophili MESAAALF   | 8  | 6  | 68   | 6  | 527  | 59.6  | 6.48  | 4426.9   | 6869.3   | 0.644447 |
| H7C2N1   | Prothymos XSPGLRPPC    | 7  | 1  | 8    | 1  | 148  | 15.8  | 4.23  | 314.9    | 488.7    | 0.644363 |
| B2R907   | cDNA, FLJ9 MSDSKEPR    | 9  | 3  | 4    | 3  | 404  | 45.7  | 5.3   | 223.3    | 346.7    | 0.644073 |
| P05091   | Aldehyde c MLRAAARF    | 4  | 3  | 17   | 1  | 517  | 56.3  | 7.05  | 286.8    | 445.7    | 0.643482 |
| A0A0X9UM | GCT-A5 ligl DIVMTQSP   | 54 | 5  | 236  | 2  | 113  | 12.5  | 6.58  | 6619.9   | 10309.4  | 0.642123 |
| Q6N092   | Putative ur GEEPSTRSF  | 34 | 14 | 1008 | 1  | 519  | 56.4  | 6.93  | 187.3    | 292.1    | 0.641219 |
| Q7Z5F5   | Liver-expre MWHLKLC    | 25 | 2  | 27   | 2  | 81   | 9.3   | 10.01 | 1508.1   | 2352.3   | 0.641117 |
| Q7L0X0   | TLR4 inter: MEAARALF   | 1  | 1  | 4    | 1  | 811  | 88.7  | 9.6   | 115.2    | 179.7    | 0.641068 |
| Q6LAM1   | Heavy chai KVTYTSQEI   | 45 | 12 | 123  | 1  | 321  | 35.9  | 7.59  | 174.9    | 272.9    | 0.640894 |
| D3DNU8   | Kininogen : MKLITILFLC | 52 | 28 | 3345 | 2  | 427  | 47.8  | 6.65  | 193831.3 | 302648.3 | 0.640451 |
| A0A024QZ | Prosaposin MYALFLLA    | 27 | 14 | 579  | 14 | 524  | 58.1  | 5.17  | 28343.4  | 44266.4  | 0.640292 |
| Q59ED3   | Intercellul: LIVTCSLQQ | 11 | 4  | 50   | 4  | 344  | 38.4  | 7.78  | 1243.9   | 1945.1   | 0.639504 |
| S6BAR0   | IgG L chain MAWTPLFI   | 31 | 6  | 1319 | 2  | 216  | 23.1  | 7.69  | 1268.6   | 1988.2   | 0.638065 |
| B2RDY9   | Adenylyl c: MADMQNI    | 4  | 2  | 2    | 2  | 475  | 51.6  | 8.22  | 174.4    | 273.4    | 0.637893 |
| A0A0F7RQ | Follicle stin MKTLQFFF | 6  | 1  | 6    | 1  | 129  | 14.7  | 7.06  | 193.2    | 303.2    | 0.637203 |
| D3DPK5   | SH3 domai KQLKPSKAI    | 14 | 5  | 147  | 5  | 257  | 26.8  | 8.38  | 5353     | 8402.9   | 0.637042 |
| P00734   | Prothromb MAHVRGLC     | 33 | 17 | 694  | 17 | 622  | 70    | 5.9   | 25009.6  | 39265.9  | 0.636929 |
| P21266   | Glutathion MSCCESSM\   | 13 | 3  | 11   | 3  | 225  | 26.5  | 5.54  | 39.2     | 61.6     | 0.636364 |
| P02671   | Fibrinogen MFSMRIVC    | 17 | 12 | 100  | 12 | 866  | 94.9  | 6.01  | 2688.6   | 4234.1   | 0.634987 |
| P01591   | Immunogl: MKNHLLFV     | 42 | 6  | 301  | 6  | 159  | 18.1  | 5.24  | 13951.6  | 22042.9  | 0.632929 |
| P15104   | Glutamine MTTSASSH     | 2  | 1  | 1    | 1  | 373  | 42    | 6.89  | 16.7     | 26.4     | 0.632576 |
| P26842   | CD27 antig MARPHPW     | 22 | 4  | 102  | 4  | 260  | 29.1  | 7.64  | 5361     | 8475.3   | 0.632544 |
| O43493   | Trans-Golg MRFVVALV    | 2  | 1  | 1    | 1  | 480  | 51.1  | 5.73  | 104.1    | 164.8    | 0.631675 |
| O43567   | E3 ubiquiti MLLSIGML   | 4  | 2  | 6    | 2  | 381  | 42.8  | 4.98  | 425.8    | 675      | 0.630815 |
| A0A024R9 | Thrombos: MGLAWGL      | 11 | 10 | 67   | 1  | 1170 | 129.3 | 4.94  | 1885.2   | 2992.3   | 0.630017 |
| Q6PK18   | 2-oxogluta MAPQRRAL    | 10 | 3  | 4    | 3  | 319  | 35.6  | 8.18  | 10.6     | 16.9     | 0.627219 |
| A0A024R0 | Macrophag MTAPGAAI     | 21 | 10 | 138  | 6  | 554  | 60.1  | 5.29  | 4574     | 7324.9   | 0.624445 |
| Q03164   | Histone-lys MAHSCRW    | 0  | 1  | 10   | 1  | 3969 | 431.5 | 9.09  | 378.3    | 606.1    | 0.624154 |
| Q6UXG3   | CMRF35-li: MRLLVLLW    | 13 | 4  | 114  | 4  | 332  | 36    | 5.92  | 7962.6   | 12761.2  | 0.62397  |
| A2NJV5   | Kappa light MRLPAQLL   | 20 | 2  | 74   | 1  | 121  | 13.2  | 7.28  | 79.8     | 127.9    | 0.623925 |
| Q2UY09   | Collagen al MWNRYFV    | 2  | 2  | 30   | 2  | 1125 | 116.6 | 6.4   | 988.9    | 1588.2   | 0.622655 |
| Q6UY14   | ADAMTS-li MENWTGR      | 2  | 2  | 3    | 2  | 1074 | 116.5 | 8.34  | 159.1    | 255.7    | 0.622214 |
| B7Z5W1   | cDNA FLJ5: MLQAPRGI    | 15 | 5  | 29   | 5  | 303  | 32.8  | 8.85  | 1145.9   | 1842.3   | 0.621994 |

|            |                                |    |    |      |   |      |       |       |        |         |          |
|------------|--------------------------------|----|----|------|---|------|-------|-------|--------|---------|----------|
| A8K556     | cDNA FLJ17111                  | 6  | 2  | 4    | 2 | 357  | 40.3  | 8.15  | 41.1   | 66.2    | 0.620846 |
| P02743     | Serum amyloid A                | 16 | 3  | 18   | 3 | 223  | 25.4  | 6.54  | 697.9  | 1124.2  | 0.620797 |
| A0A0B4J1S1 | High affinity lysozyme         | 1  | 1  | 3    | 1 | 577  | 62.1  | 9.47  | 236    | 380.5   | 0.620237 |
| A2NW98     | Rheumatoid factor              | 7  | 1  | 5    | 1 | 134  | 14.8  | 7.12  | 115.5  | 186.7   | 0.61864  |
| Q6PIL8     | IGK@ protein                   | 47 | 8  | 2890 | 1 | 236  | 25.8  | 6.55  | 2074.2 | 3364.6  | 0.616477 |
| P03973     | Antileukoprotease              | 9  | 1  | 5    | 1 | 132  | 14.3  | 8.75  | 265.8  | 431.3   | 0.616276 |
| Q59EG0     | Basement membrane type 1       | 15 | 27 | 593  | 1 | 2331 | 246.3 | 7.23  | 1070.7 | 1737.4  | 0.616266 |
| D6W551     | Chromosome 11 protein          | 2  | 1  | 1    | 1 | 284  | 30.3  | 8.38  | 45.2   | 73.6    | 0.61413  |
| Q03591     | Complement component 1         | 20 | 6  | 36   | 2 | 330  | 37.6  | 7.39  | 1029.9 | 1680.8  | 0.612744 |
| P36896     | Activin receptor type 1        | 6  | 2  | 37   | 2 | 505  | 56.8  | 7.03  | 1232.7 | 2014    | 0.612066 |
| Q9NP84     | Tumor necrosis factor receptor | 8  | 1  | 9    | 1 | 129  | 13.9  | 8.95  | 539.2  | 882.1   | 0.611269 |
| A0A075B6I1 | Protein IGK@                   | 23 | 2  | 146  | 1 | 116  | 12.8  | 5.25  | 299.4  | 489.9   | 0.611145 |
| A0A109PSI1 | GCT-A8 ligand                  | 33 | 2  | 93   | 1 | 112  | 12.5  | 8.5   | 130.5  | 213.7   | 0.610669 |
| D6W5K2     | Thymosin alpha                 | 8  | 2  | 7    | 2 | 169  | 17.9  | 10.48 | 536.4  | 878.5   | 0.610586 |
| A0A024RC1  | Cadherin 2                     | 12 | 7  | 145  | 7 | 906  | 99.7  | 4.81  | 2964.5 | 4857.4  | 0.610306 |
| Q96SA9     | Anti-streptococcal             | 49 | 3  | 130  | 1 | 107  | 11.5  | 8.85  | 34.4   | 56.4    | 0.609929 |
| Q9ULV1     | Frizzled-4                     | 4  | 2  | 39   | 2 | 537  | 59.8  | 7.27  | 1398.8 | 2293.8  | 0.609818 |
| Q86UZ8     | FZD2 protein                   | 1  | 1  | 8    | 1 | 641  | 71.4  | 9     | 371.6  | 609.8   | 0.60938  |
| O43405     | Cochlin                        | 2  | 1  | 6    | 1 | 550  | 59.4  | 7.96  | 275.7  | 452.5   | 0.609282 |
| B2R597     | cDNA, FLJ9101                  | 14 | 2  | 78   | 2 | 114  | 12.8  | 5.5   | 7418.6 | 12181.9 | 0.608985 |
| P25815     | Protein S100A1                 | 24 | 2  | 14   | 2 | 95   | 10.4  | 4.88  | 548.2  | 900.9   | 0.608503 |
| B2R960     | cDNA, FLJ9101                  | 2  | 1  | 3    | 1 | 289  | 32.2  | 4.96  | 112.4  | 184.8   | 0.608225 |
| Q8NHP8     | Putative protein               | 11 | 6  | 35   | 6 | 589  | 65.4  | 6.8   | 1367.5 | 2249.8  | 0.607832 |
| Q0KKI6     | Immunoglobulin                 | 48 | 8  | 2901 | 1 | 219  | 24    | 8.06  | 2855.3 | 4700.9  | 0.607394 |
| P01258     | Calcitonin receptor            | 13 | 2  | 2    | 2 | 141  | 15.5  | 6.52  | 244.8  | 403.3   | 0.606992 |
| P11279     | Lysosome-associated            | 8  | 4  | 74   | 4 | 417  | 44.9  | 8.75  | 3348.7 | 5517    | 0.606978 |
| A0A024RS1  | EH domain                      | 5  | 3  | 9    | 2 | 548  | 61.9  | 6.71  | 140    | 231     | 0.606061 |
| O75071     | EF-hand calcium                | 4  | 2  | 8    | 2 | 495  | 55    | 6.32  | 204.3  | 337.1   | 0.606052 |
| B2RBC8     | cDNA, FLJ9101                  | 2  | 2  | 13   | 2 | 1049 | 115.5 | 6.11  | 530.6  | 875.9   | 0.605777 |
| A0AVF1     | Intraflagellar                 | 1  | 1  | 17   | 1 | 554  | 64.1  | 6.93  | 738.7  | 1223.2  | 0.603908 |
| Q14767     | Latent transmembrane           | 4  | 6  | 32   | 6 | 1821 | 194.9 | 5.19  | 1639.6 | 2717.6  | 0.603326 |
| X6R8F3     | Neutrophil gelatinase          | 44 | 6  | 125  | 6 | 200  | 22.8  | 8.5   | 3983.1 | 6613.9  | 0.602232 |
| E7ETN3     | Uncharacterized                | 17 | 15 | 92   | 1 | 1115 | 123.9 | 6.8   | 34.2   | 56.9    | 0.601054 |

|          |              |           |    |    |      |    |      |       |      |         |          |          |
|----------|--------------|-----------|----|----|------|----|------|-------|------|---------|----------|----------|
| P14780   | Matrix mel   | MSLWQPL   | 15 | 9  | 25   | 9  | 707  | 78.4  | 6.06 | 1080.4  | 1798     | 0.60089  |
| Q16769   | Glutaminyl   | MAGGRHR   | 12 | 4  | 106  | 4  | 361  | 40.9  | 6.61 | 3676    | 6127     | 0.599967 |
| Q8N3J6   | Cell adhesi  | MIWKRSA   | 8  | 2  | 5    | 2  | 435  | 47.5  | 5.33 | 135.6   | 226.2    | 0.599469 |
| C9JF17   | Apolipoproc  | MFKQLSCS  | 33 | 8  | 1310 | 8  | 215  | 24.1  | 5.6  | 75109.3 | 125321.7 | 0.599332 |
| P02461   | Collagen al  | MMSFVQK   | 2  | 3  | 14   | 3  | 1466 | 138.5 | 6.61 | 890.7   | 1488.3   | 0.598468 |
| Q9BYJ0   | Fibroblast j | MKFVPCLL  | 5  | 1  | 1    | 1  | 223  | 24.6  | 8.87 | 38.3    | 64.1     | 0.597504 |
| O43291   | Kunitz-type  | MAQLCGLF  | 10 | 2  | 15   | 2  | 252  | 28.2  | 8.29 | 558.5   | 935.7    | 0.596879 |
| E9PR17   | CD59 glycc   | MGIQGGS   | 37 | 5  | 1278 | 5  | 130  | 14.5  | 7.77 | 66869   | 112175.1 | 0.596113 |
| Q14247   | Src substra  | MWKASAG   | 5  | 2  | 35   | 2  | 550  | 61.5  | 5.4  | 675.4   | 1133.4   | 0.595906 |
| Q13201   | Multimerir   | MKGARLFV  | 2  | 2  | 33   | 2  | 1228 | 138   | 7.93 | 1835.3  | 3084.4   | 0.595027 |
| J3KPA1   | Cysteine-ri  | MKQILHPA  | 13 | 2  | 12   | 2  | 276  | 31    | 7.61 | 686.2   | 1153.4   | 0.594937 |
| Q9Y6R7   | IgGfc-bind   | MGALWSM   | 11 | 24 | 90   | 24 | 5405 | 571.6 | 5.34 | 2487.8  | 4182.5   | 0.594812 |
| P01833   | Polymeric i  | MLLFVLTCL | 37 | 24 | 1000 | 24 | 764  | 83.2  | 5.74 | 44831.7 | 75401.1  | 0.594576 |
| P25311   | Zinc-alpha-  | MVRMVPV   | 60 | 20 | 1734 | 20 | 298  | 34.2  | 6.05 | 90208.1 | 151729.7 | 0.594532 |
| P36639   | 7,8-dihydr   | MYWSNQI   | 7  | 1  | 20   | 1  | 197  | 22.5  | 5.27 | 27.4    | 46.1     | 0.59436  |
| Q6FGQ5   | ASGR1 pro    | MTKEYQDL  | 4  | 1  | 1    | 1  | 291  | 33.2  | 5.5  | 158.4   | 266.7    | 0.593926 |
| Q68CJ9   | Cyclic AMP   | MNTDLAAC  | 7  | 2  | 39   | 2  | 461  | 49    | 5.15 | 1177.1  | 1983.8   | 0.593356 |
| Q9NPF0   | CD320 anti   | MSGGWM    | 14 | 4  | 49   | 4  | 282  | 29    | 4.75 | 1843.2  | 3112.6   | 0.592174 |
| H3BQD0   | Cerebellin-  | MLGVLELLI | 11 | 1  | 8    | 1  | 140  | 14.7  | 5.48 | 197     | 333      | 0.591592 |
| Q9ULC0   | Endomucir    | MELLQVTIL | 5  | 1  | 5    | 1  | 261  | 27.4  | 7.94 | 456.2   | 772.7    | 0.590397 |
| A0A024R8 | Prostaglan   | MATHHTLV  | 41 | 6  | 3425 | 6  | 190  | 21    | 7.8  | 92848.1 | 157265.4 | 0.590391 |
| B2R888   | Monocyte     | MERASCLL  | 35 | 12 | 411  | 12 | 375  | 40    | 6.23 | 13265.4 | 22517.1  | 0.589126 |
| P17900   | Gangliosid   | MQSLMQA   | 26 | 6  | 366  | 6  | 193  | 20.8  | 5.31 | 17844.8 | 30307.1  | 0.588799 |
| P12273   | Prolactin-ir | MRLQLLFI  | 36 | 5  | 115  | 5  | 146  | 16.6  | 8.05 | 3471.5  | 5909.5   | 0.587444 |
| B5TMG5   | Histidine ri | MGHHRPM   | 1  | 1  | 5    | 1  | 750  | 86.2  | 4.75 | 373.4   | 636.8    | 0.586369 |
| Q9UGN4   | CMRF35-li    | MWLPWAL   | 10 | 2  | 82   | 2  | 299  | 33.2  | 5.49 | 3620.8  | 6215.1   | 0.582581 |
| P15428   | 15-hydroxy   | MHVNGKV   | 3  | 1  | 1    | 1  | 266  | 29    | 5.86 | 13.2    | 22.7     | 0.581498 |
| Q8N4F0   | BPI fold-co  | MAWASRL   | 7  | 3  | 15   | 3  | 458  | 49.1  | 8.72 | 566.6   | 975      | 0.581128 |
| Q9H477   | Ribokinase   | MAASGEP   | 2  | 1  | 2    | 1  | 322  | 34.1  | 5.05 | 13      | 22.4     | 0.580357 |
| A0A024RA | Endothelin   | MRGVWPP   | 2  | 1  | 1    | 1  | 770  | 87.1  | 5.88 | 120.2   | 207.5    | 0.579277 |
| B7Z9B1   | cDNA FLJ5    | MKTPPGAS  | 20 | 12 | 469  | 12 | 760  | 83.4  | 5.12 | 16251.4 | 28059.6  | 0.579174 |
| P51170   | Amiloride-   | MAPGEKIK  | 4  | 2  | 8    | 2  | 649  | 74.2  | 7.5  | 256.5   | 446.9    | 0.573954 |
| Q6MZK8   | Putative ur  | MSDLSVIGI | 1  | 2  | 10   | 1  | 2060 | 226.3 | 4.44 | 602.8   | 1055.5   | 0.571104 |

|           |              |           |    |    |      |    |      |       |      |          |          |          |
|-----------|--------------|-----------|----|----|------|----|------|-------|------|----------|----------|----------|
| Q6UX06    | Olfactome    | MRPGLSFL  | 21 | 10 | 125  | 10 | 510  | 57.2  | 5.69 | 3660.8   | 6418.7   | 0.570334 |
| B7Z6Z4    | Myosin lig   | MVGPRSW   | 3  | 1  | 1    | 1  | 238  | 26.7  | 5.08 | 37.9     | 66.5     | 0.569925 |
| Q9NZU0    | Leucine-ric  | MISAAWSI  | 6  | 3  | 4    | 3  | 649  | 73    | 7.64 | 13.4     | 23.7     | 0.565401 |
| Q9NQ38    | Serine prot  | MKIATVSVI | 6  | 4  | 20   | 4  | 1064 | 120.6 | 8.06 | 1196.8   | 2121.7   | 0.564076 |
| Q99835    | Smoothen     | MAAARPAI  | 1  | 1  | 4    | 1  | 787  | 86.3  | 8.34 | 203.6    | 361.7    | 0.562897 |
| A0A096LN1 | Uncharact    | MALTKMLI  | 6  | 1  | 6    | 1  | 201  | 23.3  | 9.38 | 152.7    | 272.3    | 0.560779 |
| Q9GZX9    | Twisted ga   | MKLHYVAV  | 24 | 4  | 43   | 4  | 223  | 25    | 5.34 | 1627.6   | 2924.7   | 0.556502 |
| Q96DA0    | Zymogen g    | MGAQGAC   | 30 | 5  | 102  | 5  | 208  | 22.7  | 7.39 | 3676.1   | 6621.2   | 0.555201 |
| Q96FE7    | Phosphoin    | MLLAWVQ   | 21 | 5  | 638  | 5  | 263  | 28.2  | 5.01 | 33426.8  | 60639.2  | 0.551241 |
| S4R471    | Protein AN   | HKSKWNIT  | 51 | 10 | 2476 | 1  | 193  | 21.4  | 7.25 | 501.8    | 913.4    | 0.549376 |
| P98172    | Ephrin-B1    | (MARPGR   | 16 | 6  | 65   | 6  | 346  | 38    | 8.94 | 2013.2   | 3677.8   | 0.547392 |
| A8K6C9    | cDNA FLJ7    | MGIPMGK   | 9  | 2  | 8    | 2  | 180  | 20.2  | 9.32 | 149      | 272.2    | 0.547392 |
| P02750    | Leucine-ric  | MSSWSRQ   | 28 | 9  | 294  | 9  | 347  | 38.2  | 6.95 | 10453.9  | 19100    | 0.547325 |
| Q5T1S8    | Noncompa     | MTTATPLG  | 7  | 1  | 16   | 1  | 102  | 11.1  | 9.86 | 1528.2   | 2795.3   | 0.546703 |
| Q5KU26    | Collectin-1  | MKDDFAEE  | 7  | 6  | 82   | 6  | 742  | 81.5  | 5.69 | 3325.5   | 6136.8   | 0.541895 |
| Q8N114    | Protein shi  | MTAPVPAF  | 15 | 4  | 139  | 4  | 240  | 25.6  | 6.68 | 5190.8   | 9621.4   | 0.539506 |
| Q8N355    | IGL@ prot    | MAWTVLLI  | 43 | 8  | 1436 | 1  | 234  | 24.8  | 6.37 | 104      | 194.2    | 0.53553  |
| Q13508    | Ecto-ADP-r   | MKTGHFEI  | 5  | 2  | 58   | 2  | 389  | 43.9  | 6.06 | 2121.5   | 3963.6   | 0.535246 |
| P16070    | CD44 antig   | MDKFWWI   | 9  | 6  | 582  | 6  | 742  | 81.5  | 5.33 | 32947.2  | 61721.5  | 0.533804 |
| P02760    | Protein AN   | MRSLGALL  | 51 | 16 | 4825 | 5  | 352  | 39    | 6.25 | 203377.3 | 381627.7 | 0.532921 |
| A0A024R2  | Tyrosine-p   | MSSWIRW   | 2  | 1  | 2    | 1  | 838  | 93.8  | 6.57 | 13.5     | 25.5     | 0.529412 |
| P13473    | Lysosome-    | MVCFRLFP  | 7  | 3  | 113  | 3  | 410  | 44.9  | 5.63 | 4694     | 8958.6   | 0.523966 |
| P07998    | Ribonuclea   | MALEKSLV  | 58 | 6  | 309  | 6  | 156  | 17.6  | 8.79 | 13152.6  | 25347.2  | 0.518898 |
| H7BY55    | Compleme     | MTVARPSV  | 24 | 12 | 331  | 12 | 550  | 58.9  | 8.78 | 11991    | 23131.9  | 0.518375 |
| Q8NG20    | Plasminog    | MSEGNSDC  | 14 | 2  | 6    | 2  | 90   | 9.8   | 7.14 | 93.3     | 180.8    | 0.51604  |
| Q05D71    | TNFRSF10     | MARIPKTLI | 3  | 1  | 2    | 1  | 277  | 29.7  | 8.4  | 316.9    | 615.2    | 0.515117 |
| Q5IWS5    | Intelectin 1 | MNQLSFLI  | 16 | 4  | 13   | 4  | 313  | 35    | 5.82 | 407.9    | 793.9    | 0.513793 |
| Q13421    | Mesothelir   | MALPTARP  | 11 | 6  | 47   | 1  | 630  | 68.9  | 6.38 | 751      | 1462.1   | 0.513645 |
| B4DM05    | cDNA FLJ5    | MLASSRIF  | 17 | 12 | 155  | 2  | 726  | 79.3  | 4.97 | 1987.1   | 3873.7   | 0.512972 |
| Q9BZG9    | Ly-6/neurc   | MTPLLTLLI | 18 | 2  | 152  | 2  | 131  | 14    | 6.71 | 4311.3   | 8447.9   | 0.51034  |
| O43653    | Prostate st  | MKAVLLAL  | 22 | 2  | 164  | 2  | 123  | 12.9  | 5.29 | 7470.4   | 14644.6  | 0.510113 |
| P78492    | Inter-alpha  | LWAFDAVK  | 75 | 3  | 1658 | 1  | 51   | 5.7   | 4.89 | 417.2    | 820      | 0.50878  |
| A0A024R6I | Delta-like 1 | MTATEALL  | 11 | 3  | 41   | 3  | 383  | 41.2  | 5.53 | 3555.6   | 7066.9   | 0.503134 |



|           |                        |    |    |      |    |      |       |      |          |          |          |
|-----------|------------------------|----|----|------|----|------|-------|------|----------|----------|----------|
| B7Z7X3    | cDNA FLJ5: MEERGGV\    | 2  | 1  | 6    | 1  | 921  | 102.5 | 8.29 | 269      | 538.2    | 0.499814 |
| Q96JF0    | Beta-galact MKPHLKQ\   | 1  | 1  | 1    | 1  | 529  | 60.1  | 9.74 | 73.2     | 148      | 0.494595 |
| A0A024RD  | Secreted p MRIAVICFC   | 47 | 12 | 1140 | 1  | 300  | 33.8  | 4.61 | 4818.4   | 9894.7   | 0.486968 |
| P02749    | Beta-2-glyc MISPVILIF  | 45 | 11 | 404  | 11 | 345  | 38.3  | 7.97 | 12893.6  | 26758.6  | 0.481849 |
| Q96ID5    | Immunogl MRTAPSLR      | 2  | 1  | 1    | 1  | 467  | 51.8  | 6.93 | 17.1     | 35.5     | 0.48169  |
| Q9Y279    | V-set and i MGILLGLLL  | 13 | 3  | 32   | 3  | 399  | 44    | 6.35 | 914.9    | 1900.6   | 0.481374 |
| G3V3Y2    | Fibulin-5 (F MPGIKRILT | 47 | 3  | 80   | 1  | 91   | 9.9   | 6.37 | 121.8    | 255.6    | 0.476526 |
| X6RBG4    | Uromoduli MRHIMTRL     | 39 | 23 | 3450 | 23 | 689  | 75.6  | 5.87 | 173051.8 | 364524.4 | 0.474733 |
| A0A024RD  | Secreted p MRIAVICFC   | 50 | 13 | 1136 | 2  | 314  | 35.4  | 4.58 | 33620    | 70922.1  | 0.474041 |
| Q13790    | Apolipoprc MTGLCGYS    | 4  | 1  | 6    | 1  | 326  | 35.4  | 5.64 | 111      | 235.1    | 0.47214  |
| P61604    | 10 kDa hea MAGQAFR     | 30 | 3  | 3    | 3  | 102  | 10.9  | 8.92 | 45.4     | 96.8     | 0.469008 |
| B2R7Z2    | cDNA, FLJ9 MPRQLSAA    | 5  | 2  | 3    | 2  | 416  | 44.3  | 8.41 | 131      | 286.3    | 0.457562 |
| P19957    | Elafin OS=f MRASSFLIV  | 14 | 1  | 4    | 1  | 117  | 12.3  | 8.82 | 133.1    | 296.5    | 0.448904 |
| Q96TA2    | ATP-depen MFSLSTVC     | 1  | 1  | 1    | 1  | 773  | 86.4  | 8.76 | 72.9     | 165.7    | 0.439952 |
| P48551    | Interferon MLLSQNAF    | 3  | 2  | 13   | 2  | 515  | 57.7  | 4.5  | 532.1    | 1228.8   | 0.433024 |
| P55000    | Secreted L MASRWAV     | 61 | 3  | 21   | 3  | 103  | 11.2  | 5.33 | 283.5    | 663.4    | 0.427344 |
| A0A0S2Z4F | Secretoglo MKLAVTLT    | 20 | 3  | 114  | 3  | 91   | 10    | 5.06 | 5773     | 13735    | 0.420313 |
| Q9Y5Y7    | Lymphatic MARCFSLV     | 18 | 6  | 249  | 6  | 322  | 35.2  | 8.28 | 9204.5   | 22274.4  | 0.413232 |
| P31151    | Protein S1( MSNTQAEF   | 34 | 3  | 35   | 3  | 101  | 11.5  | 6.77 | 659.2    | 1722.6   | 0.382677 |
| J3KR56    | Receptor a METGALRR    | 4  | 1  | 4    | 1  | 151  | 16.8  | 5.48 | 193.7    | 510.1    | 0.379729 |
| Q96AX9    | E3 ubiquiti MGWKPSE    | 1  | 1  | 4    | 1  | 1013 | 109.9 | 8.44 | 30.2     | 88.1     | 0.342792 |

| Uniprot<br>Accession<br>Number | Protein<br>name | Protein<br>amino acid<br>sequence<br>degree(%) | The<br>number of<br>peptides<br>identified | The total<br>number of<br>times a<br>polypepti<br>de was<br>identified | The<br>number of<br>characteri<br>peptides<br>identified | Amino<br>acid length | KDa  | isoelectric<br>point | relative<br>abundanc<br>e of<br>normalize<br>d protein -<br>control |               |                |          |
|--------------------------------|-----------------|------------------------------------------------|--------------------------------------------|------------------------------------------------------------------------|----------------------------------------------------------|----------------------|------|----------------------|---------------------------------------------------------------------|---------------|----------------|----------|
|                                |                 |                                                |                                            |                                                                        |                                                          |                      |      |                      | sample<br>116                                                       | sample<br>121 | ratio(116/121) |          |
| P04279                         | Semenogel       | MKPNIIFVL                                      | 53                                         | 23                                                                     | 236                                                      | 17                   | 462  | 52.1                 | 9.29                                                                | 60356.9       | 12317.9        | 4.899934 |
| A8K6Z6                         | cDNA FLJ7       | MKPNIIFVL                                      | 43                                         | 21                                                                     | 144                                                      | 15                   | 582  | 65.6                 | 9.07                                                                | 13370.1       | 2968.1         | 4.504599 |
| S6BAP4                         | IgG H chair     | MDWTWR                                         | 22                                         | 4                                                                      | 123                                                      | 1                    | 275  | 29.4                 | 8.51                                                                | 53.7          | 14.6           | 3.678082 |
| P12273                         | Prolactin-ir    | MRLQLLFI                                       | 36                                         | 5                                                                      | 115                                                      | 5                    | 146  | 16.6                 | 8.05                                                                | 12194.5       | 5909.5         | 2.063542 |
| P52209                         | 6-phospho       | MAQADIAL                                       | 7                                          | 3                                                                      | 7                                                        | 3                    | 483  | 53.1                 | 7.23                                                                | 75.7          | 38.5           | 1.966234 |
| B4E1C2                         | Kininogen       | MKLITILFLC                                     | 36                                         | 27                                                                     | 3259                                                     | 1                    | 644  | 71.9                 | 6.81                                                                | 326           | 167.9          | 1.941632 |
| P20142                         | Gastricsin      | (MKWMVV)                                       | 2                                          | 1                                                                      | 2                                                        | 1                    | 388  | 42.4                 | 4.46                                                                | 150.6         | 78.6           | 1.916031 |
| Q9Y546                         | Leucine-ric     | MSYYLSEF                                       | 3                                          | 1                                                                      | 6                                                        | 1                    | 428  | 48.5                 | 7.46                                                                | 745.5         | 408            | 1.827206 |
| S6AWD3                         | IgG L chain     | MRLPAQLL                                       | 23                                         | 4                                                                      | 1483                                                     | 1                    | 183  | 19.9                 | 8.91                                                                | 1491.4        | 830            | 1.796867 |
| Q5HYA8                         | Meckelin C      | MATRGGAI                                       | 2                                          | 1                                                                      | 3                                                        | 1                    | 995  | 111.7                | 6.77                                                                | 38.3          | 21.4           | 1.78972  |
| Q68DC2                         | Ankyrin re      | MGEGGLPF                                       | 1                                          | 1                                                                      | 8                                                        | 1                    | 871  | 92.2                 | 7.39                                                                | 1120.5        | 647            | 1.731839 |
| Q0ZCJ2                         | Immunglot       | LVQLVESG                                       | 46                                         | 5                                                                      | 89                                                       | 1                    | 124  | 13.6                 | 7.93                                                                | 41.6          | 24.3           | 1.711934 |
| O94967                         | WD repeat       | MTAEETVN                                       | 1                                          | 1                                                                      | 3                                                        | 1                    | 919  | 101.9                | 5.94                                                                | 191.3         | 112.6          | 1.698934 |
| A0A024R8                       | Ubiquitinyl     | MARMGDS                                        | 1                                          | 1                                                                      | 2                                                        | 1                    | 916  | 102.2                | 6.21                                                                | 69.7          | 41.4           | 1.683575 |
| P15104                         | Glutamine       | MTTSASSH                                       | 2                                          | 1                                                                      | 1                                                        | 1                    | 373  | 42                   | 6.89                                                                | 44.4          | 26.4           | 1.681818 |
| Q9UL81                         | Myosin-re       | DIQMTQSP                                       | 51                                         | 3                                                                      | 104                                                      | 2                    | 107  | 11.5                 | 8.48                                                                | 38.9          | 23.2           | 1.676724 |
| P46781                         | 40S riboso      | MPVARSW                                        | 5                                          | 1                                                                      | 1                                                        | 1                    | 194  | 22.6                 | 10.65                                                               | 155.4         | 93.2           | 1.667382 |
| P13521                         | Secretogra      | MAEAKTH                                        | 2                                          | 1                                                                      | 2                                                        | 1                    | 617  | 70.9                 | 4.75                                                                | 217.4         | 132.3          | 1.643235 |
| B4DMS4                         | cDNA FLJ5       | MGKLSRCS                                       | 2                                          | 2                                                                      | 4                                                        | 2                    | 812  | 88.4                 | 4.4                                                                 | 590.7         | 369.1          | 1.600379 |
| W8QEY1                         | Lactoferrin     | MKLVFLVI                                       | 52                                         | 33                                                                     | 446                                                      | 1                    | 711  | 78.3                 | 8.18                                                                | 323.9         | 203            | 1.595567 |
| P01766                         | Immunogl        | MELGLSW                                        | 19                                         | 2                                                                      | 19                                                       | 1                    | 116  | 12.5                 | 7.08                                                                | 178.7         | 115.1          | 1.552563 |
| A0A075B6                       | Ig lambda-      | XQPKAAPS                                       | 48                                         | 4                                                                      | 1262                                                     | 1                    | 106  | 11.3                 | 8.29                                                                | 195.9         | 126.3          | 1.551069 |
| Q6UWP8                         | Suprabasin      | MHLARLVC                                       | 2                                          | 1                                                                      | 1                                                        | 1                    | 590  | 60.5                 | 7.01                                                                | 493.5         | 321.2          | 1.536426 |
| Q8NOV5                         | N-acetyl        | MMGSWKI                                        | 3                                          | 1                                                                      | 1                                                        | 1                    | 402  | 45.8                 | 7.18                                                                | 23.8          | 15.5           | 1.535484 |
| COJYY2                         | Apolipoprc      | MDPPRAL                                        | 1                                          | 3                                                                      | 5                                                        | 3                    | 4563 | 515.2                | 7.05                                                                | 61.9          | 40.5           | 1.528395 |

|           |                        |    |    |     |    |      |       |      |         |         |          |
|-----------|------------------------|----|----|-----|----|------|-------|------|---------|---------|----------|
| Q86YD5    | Low-densit MWLLGPLC    | 5  | 1  | 1   | 1  | 345  | 37.4  | 4.87 | 16.5    | 10.8    | 1.527778 |
| P01023    | Alpha-2-mi MGKNKLLF    | 14 | 17 | 49  | 17 | 1474 | 163.2 | 6.46 | 2120.8  | 1389.4  | 1.526414 |
| P04083    | Annexin A1MAMVSEFI     | 51 | 16 | 132 | 16 | 346  | 38.7  | 7.02 | 5595.3  | 3672    | 1.523775 |
| P29508    | Serpin B3 C MNSLSEAN   | 23 | 8  | 23  | 8  | 390  | 44.5  | 6.81 | 790.4   | 519.3   | 1.522049 |
| A0A161120 | Lactoferrin MKLVFLVLI  | 54 | 34 | 466 | 0  | 711  | 78.3  | 8.18 | 22989.8 | 15145.7 | 1.517909 |
| P12429    | Annexin A2 MASIWVGI    | 22 | 6  | 14  | 6  | 323  | 36.4  | 5.92 | 183.5   | 120.9   | 1.517783 |
| B2R6Q2    | Alkaline ph MISPFVLVA  | 2  | 1  | 2   | 1  | 524  | 57.2  | 6.57 | 18.2    | 12      | 1.516667 |
| Q6IB39    | RNASE6 pr MVLCFPLLI    | 19 | 2  | 12  | 2  | 150  | 17.2  | 8.76 | 465.7   | 310.4   | 1.500322 |
| P55000    | Secreted L1 MASRWAV    | 61 | 3  | 21  | 3  | 103  | 11.2  | 5.33 | 441.1   | 663.4   | 0.664908 |
| Q68CJ9    | Cyclic AMP MNTDLAAC    | 7  | 2  | 39  | 2  | 461  | 49    | 5.15 | 1312.2  | 1983.8  | 0.661458 |
| Q8NG20    | Plasminogε MSEGNSDC    | 14 | 2  | 6   | 2  | 90   | 9.8   | 7.14 | 119.2   | 180.8   | 0.659292 |
| P13645    | Keratin, tyj MSVRYSSSI | 31 | 18 | 186 | 13 | 584  | 58.8  | 5.21 | 7392.4  | 11461.9 | 0.644954 |
| H6VRG1    | Keratin 1 C MSRQFSSR   | 34 | 20 | 161 | 16 | 645  | 66.1  | 8.12 | 5944.3  | 9226.5  | 0.644264 |
| Q5IWS5    | Intellectin 1 MNQLSFLI | 16 | 4  | 13  | 4  | 313  | 35    | 5.82 | 509.9   | 793.9   | 0.642272 |
| P02743    | Serum amy MNKPLLWI     | 16 | 3  | 18  | 3  | 223  | 25.4  | 6.54 | 704.4   | 1124.2  | 0.626579 |
| A0A1B0GU  | Uncharacter MYGDIFNA   | 13 | 1  | 1   | 1  | 103  | 10.9  | 8.92 | 17.1    | 27.8    | 0.615108 |
| Q9H9P2    | Chondrolei MSRVVSLLI   | 11 | 2  | 2   | 2  | 273  | 30.4  | 6.83 | 9.1     | 15.2    | 0.598684 |
| Q15485    | Ficolin-2 O MELDRAVC   | 16 | 6  | 22  | 6  | 313  | 34    | 6.77 | 1262.5  | 2120.4  | 0.595407 |
| B2RDY9    | Adenylyl cγ MADMQNI    | 4  | 2  | 2   | 2  | 475  | 51.6  | 8.22 | 161.1   | 273.4   | 0.589247 |
| A0A0S2Z4F | Secretoglo MKLAVTLT    | 20 | 3  | 114 | 3  | 91   | 10    | 5.06 | 7533.6  | 13735   | 0.548497 |
| Q8N4F0    | BPI fold-co MAWASRL    | 7  | 3  | 15  | 3  | 458  | 49.1  | 8.72 | 533.5   | 975     | 0.547179 |
| Q13790    | Apolipoprc MTGLCGYS    | 4  | 1  | 6   | 1  | 326  | 35.4  | 5.64 | 115     | 235.1   | 0.489154 |

| Uniprot<br>Accession<br>Number | Protein<br>amino acid<br>sequence | Protein<br>amino acid<br>sequence<br>degree(%) | The<br>number of<br>peptides<br>identified | The total<br>number of<br>times a<br>polypepti<br>de was<br>identified | The<br>number of<br>characteri<br>peptides<br>identified | Amino<br>acid length | KDa   | isoelectric<br>point | relative<br>abundanc<br>e of<br>normalize<br>d protein -<br>control |               |                |
|--------------------------------|-----------------------------------|------------------------------------------------|--------------------------------------------|------------------------------------------------------------------------|----------------------------------------------------------|----------------------|-------|----------------------|---------------------------------------------------------------------|---------------|----------------|
|                                |                                   |                                                |                                            |                                                                        |                                                          |                      |       |                      | sample<br>117                                                       | sample<br>121 | ratio(117/121) |
| Q4TZM4                         | Hemoglobi TPEEKSAVT               | 89                                             | 8                                          | 135                                                                    | 2                                                        | 101                  | 11    | 6.52                 | 391.1                                                               | 134.5         | 2.907807       |
| D9YZU5                         | Beta-globir MVHLTPEE              | 78                                             | 10                                         | 328                                                                    | 1                                                        | 147                  | 16    | 7.28                 | 20029.3                                                             | 8175.3        | 2.449977       |
| A0A0S2Z4F                      | Secretoglo MKLAVTLT               | 20                                             | 3                                          | 114                                                                    | 3                                                        | 91                   | 10    | 5.06                 | 32076.5                                                             | 13735         | 2.335384       |
| A0A1K0GX                       | Globin C1 ( MSAARPG\              | 50                                             | 6                                          | 182                                                                    | 6                                                        | 177                  | 19.2  | 9.77                 | 15153                                                               | 6799.3        | 2.228612       |
| A0A024R8                       | Ubiquitinyl MARMGDS               | 1                                              | 1                                          | 2                                                                      | 1                                                        | 916                  | 102.2 | 6.21                 | 85.9                                                                | 41.4          | 2.074879       |
| Q7L9L4                         | MOB kinas MSFLFGSR                | 5                                              | 1                                          | 1                                                                      | 1                                                        | 216                  | 25.1  | 6.73                 | 18.8                                                                | 10.2          | 1.843137       |
| Q8WWQ8                         | Stabilin-2 ( MMLQHLV              | 0                                              | 1                                          | 1                                                                      | 1                                                        | 2551                 | 276.8 | 6.4                  | 21.3                                                                | 11.6          | 1.836207       |
| P49788                         | Retinoic ac MQPRRQR               | 20                                             | 5                                          | 28                                                                     | 5                                                        | 294                  | 33.3  | 8.51                 | 1750.1                                                              | 965.3         | 1.813011       |
| Q59EU6                         | EF hand do CEERAARQ               | 4                                              | 1                                          | 1                                                                      | 1                                                        | 265                  | 29.8  | 6.21                 | 18.2                                                                | 10.2          | 1.784314       |
| A0A140VK                       | Leukotrien MPEIVDTC               | 2                                              | 1                                          | 1                                                                      | 1                                                        | 611                  | 69.2  | 6.18                 | 50                                                                  | 28.3          | 1.766784       |
| Q9NX62                         | Inositol mc MAPMGIRI              | 3                                              | 1                                          | 2                                                                      | 1                                                        | 359                  | 38.7  | 6.86                 | 23                                                                  | 13.2          | 1.742424       |
| Q53FP0                         | Pyridoxine MTCWLRG                | 6                                              | 1                                          | 1                                                                      | 1                                                        | 261                  | 29.9  | 7.4                  | 41.4                                                                | 24.6          | 1.682927       |
| B2R9K8                         | cDNA, FLJ9 MAAVKTLN               | 2                                              | 1                                          | 1                                                                      | 1                                                        | 531                  | 57.9  | 6.8                  | 29                                                                  | 17.3          | 1.676301       |
| Q8N0V5                         | N-acetylac MMGSWKI                | 3                                              | 1                                          | 1                                                                      | 1                                                        | 402                  | 45.8  | 7.18                 | 25.7                                                                | 15.5          | 1.658065       |
| B4DMS4                         | cDNA FLJ5 MGKLSRCS                | 2                                              | 2                                          | 4                                                                      | 2                                                        | 812                  | 88.4  | 4.4                  | 608.2                                                               | 369.1         | 1.647792       |
| P04118                         | Colipase O MEKILILLV              | 7                                              | 1                                          | 9                                                                      | 1                                                        | 112                  | 11.9  | 7.5                  | 1277.9                                                              | 777.9         | 1.642756       |
| X6R8F3                         | Neutrophil MPLGLLWI               | 44                                             | 6                                          | 125                                                                    | 6                                                        | 200                  | 22.8  | 8.5                  | 10723.4                                                             | 6613.9        | 1.621343       |
| Q9UBV8                         | Peflin OS=H MASYPYRC              | 3                                              | 1                                          | 1                                                                      | 1                                                        | 284                  | 30.4  | 6.54                 | 160                                                                 | 99.1          | 1.614531       |
| P15291                         | Beta-1,4-g MRLREPLL               | 5                                              | 2                                          | 18                                                                     | 2                                                        | 398                  | 43.9  | 8.65                 | 951                                                                 | 589.3         | 1.613779       |
| Q68DC2                         | Ankyrin re MGEGGLPF               | 1                                              | 1                                          | 8                                                                      | 1                                                        | 871                  | 92.2  | 7.39                 | 1042.4                                                              | 647           | 1.611128       |
| A8K987                         | cDNA FLJ7 MAEKPKLH                | 18                                             | 5                                          | 71                                                                     | 1                                                        | 222                  | 25.7  | 9                    | 5215.5                                                              | 3254.9        | 1.602353       |
| Q14117                         | Dihydropyr MAAPSRLI               | 3                                              | 2                                          | 6                                                                      | 2                                                        | 519                  | 56.6  | 7.27                 | 209.1                                                               | 130.9         | 1.597403       |
| A0A075B6                       | Protein IG MDMRVPA                | 14                                             | 1                                          | 2                                                                      | 1                                                        | 117                  | 12.7  | 9.25                 | 32                                                                  | 20.1          | 1.59204        |
| D3DSM8                         | Formimino MRSRWGG                 | 2                                              | 1                                          | 1                                                                      | 1                                                        | 581                  | 63.3  | 6.3                  | 42                                                                  | 26.4          | 1.590909       |
| B4E1C2                         | Kininogen MKLITILFLC              | 36                                             | 27                                         | 3259                                                                   | 1                                                        | 644                  | 71.9  | 6.81                 | 265.5                                                               | 167.9         | 1.581298       |

|           |                        |    |   |      |   |      |       |       |         |         |          |
|-----------|------------------------|----|---|------|---|------|-------|-------|---------|---------|----------|
| P12724    | Eosinophil MVPKLFTS    | 17 | 2 | 5    | 2 | 160  | 18.4  | 10.02 | 122.3   | 77.9    | 1.569961 |
| O95861    | 3'(2'),5'-bis MASSNTVL | 3  | 1 | 1    | 1 | 308  | 33.4  | 5.69  | 33.3    | 21.3    | 1.56338  |
| A0A140VK1 | Aspartate r MAPPSVFA   | 14 | 5 | 9    | 5 | 413  | 46.2  | 7.01  | 626.6   | 402.1   | 1.558319 |
| P07195    | L-lactate d MATLKEKL   | 30 | 9 | 126  | 8 | 334  | 36.6  | 6.05  | 11867.5 | 7645.5  | 1.55222  |
| P52209    | 6-phospho MAQADIAL     | 7  | 3 | 7    | 3 | 483  | 53.1  | 7.23  | 59.6    | 38.5    | 1.548052 |
| B2RD36    | cDNA, FLJ9 MANEAYPC    | 15 | 4 | 17   | 4 | 245  | 28    | 6.79  | 1323.4  | 855.7   | 1.54657  |
| B1B5Q3    | N-acylsphir YRGAVPW    | 28 | 7 | 64   | 1 | 219  | 24.7  | 7.42  | 1705.7  | 1108.7  | 1.538468 |
| A8K0T9    | cDNA FLJ7! MADFDDR     | 17 | 3 | 6    | 2 | 286  | 32.9  | 5.69  | 362.7   | 238.9   | 1.518208 |
| B4EOX1    | Beta-2-mic MSRSVALA    | 27 | 4 | 110  | 4 | 122  | 13.9  | 7.44  | 12376.4 | 8163.5  | 1.516065 |
| A0A075B61 | Ig lambda- XQPKAAPS    | 48 | 4 | 1262 | 1 | 106  | 11.3  | 8.29  | 191.2   | 126.3   | 1.513856 |
| B2RAF9    | Suppressor MGSDRARI    | 2  | 1 | 1    | 1 | 855  | 94.7  | 6.52  | 50.1    | 33.1    | 1.513595 |
| P04899    | Guanine nt MGCTVSAE    | 10 | 3 | 20   | 2 | 355  | 40.4  | 5.54  | 221.7   | 147.3   | 1.505092 |
| K7N7A8    | Uncharact XETLTLHSL    | 4  | 1 | 3    | 1 | 449  | 48.8  | 5.22  | 18.9    | 12.6    | 1.5      |
| Q8N355    | IGL@ prot MAWTVLLI     | 43 | 8 | 1436 | 1 | 234  | 24.8  | 6.37  | 126.6   | 194.2   | 0.651905 |
| P02763    | Alpha-1-ac MALSWVL     | 40 | 7 | 965  | 5 | 201  | 23.5  | 5.02  | 30650.9 | 48390.7 | 0.633405 |
| A0A1B0GU  | Uncharact MYGDIFNA     | 13 | 1 | 1    | 1 | 103  | 10.9  | 8.92  | 16.8    | 27.8    | 0.604317 |
| Q96AX9    | E3 ubiquiti MGWKPSE    | 1  | 1 | 4    | 1 | 1013 | 109.9 | 8.44  | 52.6    | 88.1    | 0.597049 |
| B2RDY9    | Adenyl c MADMQNI       | 4  | 2 | 2    | 2 | 475  | 51.6  | 8.22  | 153.9   | 273.4   | 0.562911 |
| Q5IWS5    | Intellectin 1 MNQLSFL  | 16 | 4 | 13   | 4 | 313  | 35    | 5.82  | 416.2   | 793.9   | 0.524247 |

| Uniprot Accession Number | Protein name | Protein amino acid sequence | Protein amino acid sequence matching degree(%) | The number of peptides identified | The total number of polypeptide was identified | The number of characteristic peptides identified | Amino acid length | KDa   | isoelectric point | relative abundance of sample 118 | relative abundance of sample 121 | relative abundance of normalized protein - control | ratio(118/121) |
|--------------------------|--------------|-----------------------------|------------------------------------------------|-----------------------------------|------------------------------------------------|--------------------------------------------------|-------------------|-------|-------------------|----------------------------------|----------------------------------|----------------------------------------------------|----------------|
| Q4TZM4                   | Hemoglobi    | TPEEKSAVT                   | 89                                             | 8                                 | 135                                            | 2                                                | 101               | 11    | 6.52              | 392.4                            | 134.5                            | 2.917472                                           |                |
| V9HVY1                   | Epididymis   | MKRMVSV                     | 25                                             | 11                                | 29                                             | 11                                               | 491               | 55.9  | 8.27              | 2788.9                           | 1138.4                           | 2.449842                                           |                |
| A0A1K0FU                 | Globin E1 (  | MLSAQERA                    | 11                                             | 1                                 | 1                                              | 1                                                | 141               | 15.6  | 6.62              | 19                               | 7.8                              | 2.435897                                           |                |
| C0JYY2                   | Apolipoproc  | MDPPRAL                     | 1                                              | 3                                 | 5                                              | 3                                                | 4563              | 515.2 | 7.05              | 95.9                             | 40.5                             | 2.367901                                           |                |
| K7ES00                   | Histone H3   | MARTKQTA                    | 9                                              | 2                                 | 8                                              | 2                                                | 151               | 16.6  | 11.84             | 1406.8                           | 602.6                            | 2.33455                                            |                |
| A0A024R3                 | Apolipoproc  | MKAAVLTL                    | 60                                             | 16                                | 172                                            | 16                                               | 267               | 30.8  | 5.76              | 13017.8                          | 5583.4                           | 2.331518                                           |                |
| P59665                   | Neutrophil   | MRTLAILA                    | 19                                             | 2                                 | 29                                             | 2                                                | 94                | 10.2  | 6.99              | 4014.5                           | 1746.8                           | 2.298202                                           |                |
| P08246                   | Neutrophil   | MTLGRRLA                    | 6                                              | 2                                 | 11                                             | 2                                                | 267               | 28.5  | 9.35              | 783.7                            | 343.6                            | 2.28085                                            |                |
| D9YZU5                   | Beta-globin  | MVHLTPEE                    | 78                                             | 10                                | 328                                            | 1                                                | 147               | 16    | 7.28              | 18593.9                          | 8175.3                           | 2.2744                                             |                |
| B2R9K8                   | cDNA, FLJ9   | MAAVKTLN                    | 2                                              | 1                                 | 1                                              | 1                                                | 531               | 57.9  | 6.8               | 38.9                             | 17.3                             | 2.248555                                           |                |
| A0A0U1RR                 | Histone H2   | MSGRGKQ                     | 14                                             | 3                                 | 13                                             | 3                                                | 170               | 18.5  | 11.52             | 1312.5                           | 601.7                            | 2.18132                                            |                |
| B2R4R0                   | Histone H4   | MSGRGKG                     | 50                                             | 5                                 | 58                                             | 5                                                | 103               | 11.4  | 11.36             | 3202.8                           | 1469.8                           | 2.179072                                           |                |
| P24158                   | Myeloblast   | MAHRPPSF                    | 17                                             | 3                                 | 17                                             | 3                                                | 256               | 27.8  | 8.35              | 623                              | 289.9                            | 2.149017                                           |                |
| P19013                   | Keratin, ty  | MIARQQCV                    | 20                                             | 10                                | 34                                             | 7                                                | 534               | 57.3  | 6.61              | 1621.4                           | 765.5                            | 2.118093                                           |                |
| P05164                   | Myeloperoc   | MGVPPFSS                    | 20                                             | 13                                | 48                                             | 13                                               | 745               | 83.8  | 8.97              | 2952.7                           | 1404.2                           | 2.102763                                           |                |
| P11234                   | Ras-related  | MAANKSKC                    | 7                                              | 1                                 | 2                                              | 1                                                | 206               | 23.4  | 6.62              | 39.8                             | 19.1                             | 2.08377                                            |                |
| P13647                   | Keratin, ty  | MSRQSSVS                    | 18                                             | 11                                | 34                                             | 4                                                | 590               | 62.3  | 7.74              | 22.9                             | 11                               | 2.081818                                           |                |
| C9JC84                   | Fibrinogen   | MSWSLHP                     | 28                                             | 9                                 | 37                                             | 9                                                | 461               | 52.3  | 5.63              | 1831.3                           | 884.6                            | 2.070201                                           |                |
| A0A1K0GX                 | Globin C1 (  | MSAARPGV                    | 50                                             | 6                                 | 182                                            | 6                                                | 177               | 19.2  | 9.77              | 13904.8                          | 6799.3                           | 2.045034                                           |                |
| A0A0S2Z3                 | EGF contain  | MLKALFLT                    | 46                                             | 14                                | 386                                            | 1                                                | 413               | 45.7  | 5.47              | 239.5                            | 118.6                            | 2.019393                                           |                |
| V9GYM3                   | Apolipoproc  | MCEQHPKI                    | 14                                             | 2                                 | 10                                             | 2                                                | 133               | 14.9  | 8.27              | 635.1                            | 315.6                            | 2.012357                                           |                |
| Q6ICS1                   | Putative ur  | MAQTNSFF                    | 24                                             | 3                                 | 114                                            | 1                                                | 166               | 18.7  | 5.95              | 61.3                             | 30.7                             | 1.996743                                           |                |
| A0A075B6                 | Protein IGF  | MDMRVPA                     | 14                                             | 1                                 | 2                                              | 1                                                | 117               | 12.7  | 9.25              | 39.4                             | 20.1                             | 1.960199                                           |                |
| Q59EG0                   | Basement     | SVTEGQTL                    | 15                                             | 27                                | 593                                            | 1                                                | 2331              | 246.3 | 7.23              | 3369.3                           | 1737.4                           | 1.939277                                           |                |
| Q15043                   | Zinc transp  | MKLLLLHP                    | 2                                              | 1                                 | 3                                              | 1                                                | 492               | 54.2  | 5.33              | 257.6                            | 133                              | 1.936842                                           |                |

|          |             |             |    |    |      |    |       |        |       |         |         |          |
|----------|-------------|-------------|----|----|------|----|-------|--------|-------|---------|---------|----------|
| B4DR52   | Histone H2  | MPDPAKSA    | 20 | 3  | 22   | 3  | 166   | 18     | 10.32 | 1902.3  | 992.5   | 1.916675 |
| Q96IY4   | Carboxype   | MKLCSLAV    | 2  | 1  | 2    | 1  | 423   | 48.4   | 7.71  | 53.3    | 27.9    | 1.910394 |
| A0A024R0 | Apolipopro  | MRLFLSLPV   | 11 | 1  | 4    | 1  | 83    | 9.3    | 8.47  | 95.9    | 52      | 1.844231 |
| Q9NX62   | Inositol mc | MAPMGIRI    | 3  | 1  | 2    | 1  | 359   | 38.7   | 6.86  | 24      | 13.2    | 1.818182 |
| P08263   | Glutathion  | MAEKPKLF    | 18 | 5  | 78   | 1  | 222   | 25.6   | 8.88  | 586.6   | 331     | 1.772205 |
| P01023   | Alpha-2-m   | MGKNKLLH    | 14 | 17 | 49   | 17 | 1474  | 163.2  | 6.46  | 2447.4  | 1389.4  | 1.76148  |
| B2RCC8   | cDNA, FLJ9  | MFLWLFLII   | 2  | 1  | 1    | 1  | 837   | 94.4   | 7.97  | 30.9    | 17.6    | 1.755682 |
| D3DRR6   | Inter-alpha | MKRLTCFF    | 5  | 4  | 10   | 4  | 947   | 106.5  | 6.95  | 432.7   | 249.7   | 1.732879 |
| B4E1C2   | Kininogen   | MKLITILFLC  | 36 | 27 | 3259 | 1  | 644   | 71.9   | 6.81  | 290.3   | 167.9   | 1.729005 |
| P13521   | Secretogra  | MAEAKTHV    | 2  | 1  | 2    | 1  | 617   | 70.9   | 4.75  | 226.3   | 132.3   | 1.710506 |
| P23468   | Receptor-t  | MVHVARLI    | 2  | 3  | 3    | 2  | 1912  | 214.6  | 6.57  | 82.3    | 48.4    | 1.700413 |
| P20160   | Azurocidin  | MTRLTVLA    | 14 | 3  | 27   | 3  | 251   | 26.9   | 9.5   | 1039.5  | 611.6   | 1.699964 |
| A1A4E9   | Keratin 13  | MSLRLQSS    | 25 | 14 | 107  | 9  | 458   | 49.6   | 4.96  | 5475.3  | 3225.2  | 1.697662 |
| Q59EU6   | EF hand do  | CEERAARQ    | 4  | 1  | 1    | 1  | 265   | 29.8   | 6.21  | 17.3    | 10.2    | 1.696078 |
| Q96SB0   | Anti-strept | QSVLTQPP    | 22 | 2  | 13   | 1  | 108   | 11.6   | 6.54  | 159.3   | 94.1    | 1.69288  |
| S6BAR0   | IgG L chain | MAWTPLFI    | 31 | 6  | 1319 | 2  | 216   | 23.1   | 7.69  | 3364.4  | 1988.2  | 1.692184 |
| P15291   | Beta-1,4-g  | MRLREPLL    | 5  | 2  | 18   | 2  | 398   | 43.9   | 8.65  | 997.2   | 589.3   | 1.692177 |
| Q9UKU9   | Angiopoiet  | MRPLCVTC    | 23 | 11 | 129  | 11 | 493   | 57.1   | 7.53  | 10462.1 | 6197.8  | 1.688034 |
| Q92743   | Serine prot | MQIPRAAL    | 3  | 1  | 1    | 1  | 480   | 51.3   | 7.83  | 123.9   | 74.4    | 1.665323 |
| D3DQU2   | Tripeptidyl | MTADPRKC    | 20 | 8  | 82   | 8  | 572   | 62.2   | 6.65  | 5232.1  | 3143.2  | 1.664578 |
| A0A0A0M1 | Titin OS=H  | (content is | 0  | 4  | 5    | 4  | 35991 | 3992.2 | 6.39  | 256     | 154.4   | 1.658031 |
| P52209   | 6-phospho   | MAQADIAL    | 7  | 3  | 7    | 3  | 483   | 53.1   | 7.23  | 63.6    | 38.5    | 1.651948 |
| Q9UL81   | Myosin-rec  | DIQMTQSF    | 51 | 3  | 104  | 2  | 107   | 11.5   | 8.48  | 38      | 23.2    | 1.637931 |
| V9HWA9   | Epididymis  | MGPTSGPS    | 35 | 55 | 305  | 55 | 1663  | 187    | 6.4   | 17333.2 | 10679.9 | 1.622974 |
| A0A075B6 | Immunoglc   | MSVPTMA     | 15 | 2  | 29   | 2  | 122   | 12.8   | 4.55  | 3276.7  | 2023.3  | 1.619483 |
| B4DMS4   | cDNA FLJ5   | MGKLSRCS    | 2  | 2  | 4    | 2  | 812   | 88.4   | 4.4   | 594.4   | 369.1   | 1.610404 |
| P20333   | Tumor nec   | MAPVAVW     | 6  | 2  | 7    | 1  | 461   | 48.3   | 6.28  | 1127.5  | 706.7   | 1.595444 |
| A0A024RA | Arylsulfata | MGPRGAA     | 3  | 2  | 5    | 2  | 533   | 59.6   | 8.21  | 377.4   | 236.9   | 1.593077 |
| Q9Y2S2   | Lambda-cr   | MASSAAGC    | 13 | 4  | 25   | 4  | 319   | 35.4   | 6.18  | 1034.1  | 653.3   | 1.582887 |
| B3KQP7   | cDNA FLJ9   | MMTKVLG     | 2  | 1  | 1    | 1  | 450   | 49.7   | 6.61  | 166.6   | 105.3   | 1.582146 |
| P48547   | Potassium   | MGQGDES     | 3  | 1  | 2    | 1  | 511   | 57.9   | 6.58  | 30      | 19      | 1.578947 |
| O94991   | SLIT and N  | MHTCCPPV    | 1  | 1  | 4    | 1  | 958   | 107.4  | 6.95  | 155.5   | 98.7    | 1.575481 |
| Q6FHG5   | Gamma-sy    | MDVFKKGI    | 13 | 1  | 7    | 1  | 127   | 13.3   | 4.86  | 168.6   | 107.4   | 1.569832 |

|           |              |           |    |    |     |    |      |       |       |         |         |          |
|-----------|--------------|-----------|----|----|-----|----|------|-------|-------|---------|---------|----------|
| A0A125U0  | GCT-A1 he    | QVQLQESC  | 25 | 3  | 32  | 1  | 127  | 13.7  | 8.78  | 164.3   | 105.3   | 1.560304 |
| P00338    | L-lactate de | MATLKDQL  | 27 | 8  | 29  | 7  | 332  | 36.7  | 8.27  | 993.3   | 637.4   | 1.558362 |
| P13640    | Metallothio  | MDPNCSCA  | 32 | 2  | 4   | 1  | 62   | 6.1   | 7.96  | 866.3   | 559.1   | 1.549454 |
| Q53Y06    | ATPase, H+   | MALSDADV  | 4  | 1  | 4   | 1  | 226  | 26.1  | 8     | 224.7   | 145.2   | 1.547521 |
| A8K0T9    | cDNA FLJ79   | MADFDDR   | 17 | 3  | 6   | 2  | 286  | 32.9  | 5.69  | 369.4   | 238.9   | 1.546254 |
| A0A161I20 | Lactoferrin  | MKLVFLVL  | 54 | 34 | 466 | 0  | 711  | 78.3  | 8.18  | 23345.6 | 15145.7 | 1.541401 |
| Q8N474    | Secreted fr  | MGIGRSEG  | 9  | 2  | 4   | 2  | 314  | 35.4  | 8.85  | 97.4    | 63.3    | 1.538705 |
| X6R8A1    | Carboxype    | MTSSPRAP  | 20 | 9  | 131 | 9  | 498  | 56.2  | 6.61  | 8585.6  | 5613.9  | 1.529347 |
| D6W5K2    | Thymosin,    | GVSSRFPEF | 8  | 2  | 7   | 2  | 169  | 17.9  | 10.48 | 1341.3  | 878.5   | 1.526807 |
| Q03164    | Histone-lys  | MAHSCRW   | 0  | 1  | 10  | 1  | 3969 | 431.5 | 9.09  | 922.7   | 606.1   | 1.522356 |
| Q96C23    | Aldose 1-e   | MASVTRAV  | 11 | 3  | 9   | 3  | 342  | 37.7  | 6.65  | 51.1    | 33.6    | 1.520833 |
| B1B5Q3    | N-acylsphir  | YRGAVPW   | 28 | 7  | 64  | 1  | 219  | 24.7  | 7.42  | 1682.7  | 1108.7  | 1.517723 |
| P04155    | Trefoil fact | MATMENK   | 30 | 2  | 29  | 2  | 84   | 9.1   | 4.35  | 3474.8  | 2289.6  | 1.517645 |
| PODJD8    | Pepsin A-3   | MKWLLLLG  | 9  | 4  | 250 | 4  | 388  | 42    | 4.41  | 34342.5 | 22700.4 | 1.512859 |
| Q9HB40    | Retinoid-in  | MELALRRS  | 6  | 3  | 41  | 3  | 452  | 50.8  | 5.81  | 1368.5  | 904.6   | 1.512823 |
| A0A140VK  | Transaldol   | MSSSPVKR  | 6  | 2  | 5   | 2  | 337  | 37.5  | 6.81  | 318.9   | 211     | 1.511374 |
| Q59ER5    | WD repeat    | RAGPGGSR  | 2  | 1  | 2   | 1  | 624  | 68.1  | 7.23  | 90.3    | 59.9    | 1.507513 |
| Q7L9L4    | MOB kinas    | MSFLFGSR  | 5  | 1  | 1   | 1  | 216  | 25.1  | 6.73  | 15.3    | 10.2    | 1.5      |
| Q8WWQ8    | Stabilin-2 C | MMLQHLV   | 0  | 1  | 1   | 1  | 2551 | 276.8 | 6.4   | 17.4    | 11.6    | 1.5      |
| J3KPA1    | Cysteine-ri  | MKQILHPA  | 13 | 2  | 12  | 2  | 276  | 31    | 7.61  | 768.3   | 1153.4  | 0.666118 |
| Q9UBX7    | Kallikrein-1 | MQRLRWL   | 14 | 4  | 43  | 4  | 282  | 31    | 8.94  | 1809.4  | 2722.4  | 0.664634 |
| P51159    | Ras-relatec  | MSDGDYD   | 4  | 1  | 2   | 1  | 221  | 24.9  | 5.22  | 126.7   | 190.9   | 0.663698 |
| A0A024R6  | Delta-like 1 | MTATEALL  | 11 | 3  | 41  | 3  | 383  | 41.2  | 5.53  | 4643.6  | 7066.9  | 0.657092 |
| B2RDY9    | Adenylyl c   | MADMQNI   | 4  | 2  | 2   | 2  | 475  | 51.6  | 8.22  | 175.6   | 273.4   | 0.642282 |
| Q6UX06    | Olfactome    | MRPGLSFL  | 21 | 10 | 125 | 10 | 510  | 57.2  | 5.69  | 4072.6  | 6418.7  | 0.63449  |
| O00337    | Sodium/nu    | MENDPSRF  | 3  | 1  | 26  | 1  | 649  | 71.5  | 7.59  | 125.3   | 198.9   | 0.629965 |
| B8ZWD9    | Diazepam     | MGWTSLC   | 31 | 3  | 46  | 3  | 144  | 16.1  | 5.05  | 1173.8  | 1884.1  | 0.623003 |
| O43653    | Prostate st  | MKAVLLAL  | 22 | 2  | 164 | 2  | 123  | 12.9  | 5.29  | 9102    | 14644.6 | 0.621526 |
| H3BQD0    | Cerebellin-  | MLGVLELL  | 11 | 1  | 8   | 1  | 140  | 14.7  | 5.48  | 205.1   | 333     | 0.615916 |
| Q9Y6R7    | IgGfc-bind   | MGALWSV   | 11 | 24 | 90  | 24 | 5405 | 571.6 | 5.34  | 2513.9  | 4182.5  | 0.601052 |
| B7ZLW2    | HELZ prote   | MEDRRAEK  | 1  | 1  | 2   | 1  | 1943 | 219   | 7.42  | 14.5    | 24.3    | 0.596708 |
| B3KQF4    | cDNA FLJ90   | MAPFEPLA  | 45 | 7  | 40  | 7  | 207  | 23.2  | 8.1   | 910.3   | 1549.3  | 0.587556 |
| B2R880    | cDNA, FLJ9   | MANCEFSF  | 4  | 1  | 3   | 1  | 300  | 34.3  | 7.47  | 25.8    | 44.1    | 0.585034 |



|           |              |           |    |    |      |    |     |       |      |         |          |          |
|-----------|--------------|-----------|----|----|------|----|-----|-------|------|---------|----------|----------|
| B2R7D1    | cDNA, FLJ9   | MMDASKE   | 2  | 2  | 7    | 2  | 684 | 77.1  | 6.76 | 23      | 39.4     | 0.583756 |
| Q5HYL0    | Putative ur  | MQRAVPE   | 1  | 1  | 2    | 1  | 967 | 105.3 | 6.83 | 28.4    | 48.9     | 0.580777 |
| P25311    | Zinc-alpha   | MVRMVPV   | 60 | 20 | 1734 | 20 | 298 | 34.2  | 6.05 | 87034.2 | 151729.7 | 0.573613 |
| Q96DR8    | Mucin-like   | MKFLAVLV  | 18 | 2  | 78   | 2  | 90  | 9     | 4.64 | 4241.8  | 7477.2   | 0.567298 |
| Q8N4F0    | BPI fold-co  | MAWASRL   | 7  | 3  | 15   | 3  | 458 | 49.1  | 8.72 | 549     | 975      | 0.563077 |
| Q6N092    | Putative ur  | GEEPSTRSF | 34 | 14 | 1008 | 1  | 519 | 56.4  | 6.93 | 161.8   | 292.1    | 0.55392  |
| B4DPH5    | cDNA FLJ5    | MVLNDVYF  | 34 | 21 | 324  | 1  | 533 | 61.4  | 5.33 | 16.7    | 31.5     | 0.530159 |
| M0R1F0    | Prostate-sp  | XFLTLSVTM | 52 | 10 | 493  | 9  | 262 | 28.6  | 7.44 | 16031.4 | 34544.1  | 0.464085 |
| A0A0S2Z4F | Secretoglo   | MKLAVTLT  | 20 | 3  | 114  | 3  | 91  | 10    | 5.06 | 6110.8  | 13735    | 0.444907 |
| O60662    | Kelch-like p | MDSQRELA  | 1  | 1  | 2    | 1  | 606 | 68    | 5.29 | 83.2    | 188      | 0.442553 |
| P15309    | Prostatic a  | MRAAPLLL  | 32 | 13 | 827  | 13 | 386 | 44.5  | 6.24 | 24586.7 | 60390    | 0.407132 |
| B2R597    | cDNA, FLJ9   | MNVLLGSV  | 14 | 2  | 78   | 2  | 114 | 12.8  | 5.5  | 2737.9  | 12181.9  | 0.224751 |

| Uniprot<br>Accession<br>Number | Protein<br>amino<br>acid<br>sequence | Protein<br>amino acid<br>sequence<br>degree(%) | The<br>number of<br>peptides<br>identified | The total<br>number of<br>times a<br>polypepti<br>de was<br>identified | The<br>number of<br>characteri<br>stic<br>peptides<br>identified | Amino<br>acid length | KDa | isoelectric<br>point | relative<br>abundanc<br>e of<br>normalize<br>d protein -<br>sample<br>119 | relative<br>abundanc<br>e of<br>normalize<br>d protein -<br>control<br>sample<br>121 | relative<br>abundanc<br>e of<br>normalize<br>d protein -<br>control<br>sample<br>119/121 |          |
|--------------------------------|--------------------------------------|------------------------------------------------|--------------------------------------------|------------------------------------------------------------------------|------------------------------------------------------------------|----------------------|-----|----------------------|---------------------------------------------------------------------------|--------------------------------------------------------------------------------------|------------------------------------------------------------------------------------------|----------|
| P00738                         | Haptoglobi                           | MSALGAVI                                       | 46                                         | 19                                                                     | 454                                                              | 19                   | 406 | 45.2                 | 6.58                                                                      | 86108.9                                                                              | 22466.7                                                                                  | 3.832735 |
| K7ES00                         | Histone H3                           | MARTKQTA                                       | 9                                          | 2                                                                      | 8                                                                | 2                    | 151 | 16.6                 | 11.84                                                                     | 1900.6                                                                               | 602.6                                                                                    | 3.153999 |
| Q4TZM4                         | Hemoglobi                            | TPEEKSAVT                                      | 89                                         | 8                                                                      | 135                                                              | 2                    | 101 | 11                   | 6.52                                                                      | 398.7                                                                                | 134.5                                                                                    | 2.964312 |
| B4DR52                         | Histone H2                           | MPDPAKSA                                       | 20                                         | 3                                                                      | 22                                                               | 3                    | 166 | 18                   | 10.32                                                                     | 2601.2                                                                               | 992.5                                                                                    | 2.620856 |
| B2R4R0                         | Histone H4                           | MSGRGKG                                        | 50                                         | 5                                                                      | 58                                                               | 5                    | 103 | 11.4                 | 11.36                                                                     | 3831.6                                                                               | 1469.8                                                                                   | 2.606885 |
| A0A024R8                       | Ubiquitinyl                          | MARMGDS                                        | 1                                          | 1                                                                      | 2                                                                | 1                    | 916 | 102.2                | 6.21                                                                      | 105.9                                                                                | 41.4                                                                                     | 2.557971 |
| D9YZU5                         | Beta-globin                          | MVHLTPEE                                       | 78                                         | 10                                                                     | 328                                                              | 1                    | 147 | 16                   | 7.28                                                                      | 20856.2                                                                              | 8175.3                                                                                   | 2.551124 |
| A0A0U1RR                       | Histone H2                           | MSGRGKQ                                        | 14                                         | 3                                                                      | 13                                                               | 3                    | 170 | 18.5                 | 11.52                                                                     | 1501.5                                                                               | 601.7                                                                                    | 2.49543  |
| P59665                         | Neutrophil                           | MRTLAILAA                                      | 19                                         | 2                                                                      | 29                                                               | 2                    | 94  | 10.2                 | 6.99                                                                      | 4344.9                                                                               | 1746.8                                                                                   | 2.487348 |
| P19013                         | Keratin, ty                          | MIARQQCV                                       | 20                                         | 10                                                                     | 34                                                               | 7                    | 534 | 57.3                 | 6.61                                                                      | 1858.7                                                                               | 765.5                                                                                    | 2.428086 |
| P24158                         | Myeloblast                           | MAHRPPSF                                       | 17                                         | 3                                                                      | 17                                                               | 3                    | 256 | 27.8                 | 8.35                                                                      | 677.4                                                                                | 289.9                                                                                    | 2.336668 |
| A0A1K0GX                       | Globin C1 (                          | MSAARPGV                                       | 50                                         | 6                                                                      | 182                                                              | 6                    | 177 | 19.2                 | 9.77                                                                      | 15770.1                                                                              | 6799.3                                                                                   | 2.319371 |
| P15104                         | Glutamine                            | MTTSASSH                                       | 2                                          | 1                                                                      | 1                                                                | 1                    | 373 | 42                   | 6.89                                                                      | 58.3                                                                                 | 26.4                                                                                     | 2.208333 |
| P80511                         | Protein S10                          | MTKLEEHL                                       | 8                                          | 1                                                                      | 5                                                                | 1                    | 92  | 10.6                 | 6.25                                                                      | 1638.1                                                                               | 750.5                                                                                    | 2.182678 |
| Q86SQ8                         | Beta-defen                           | GNFLTGLG                                       | 21                                         | 1                                                                      | 13                                                               | 1                    | 47  | 5.1                  | 8.73                                                                      | 583.1                                                                                | 268.5                                                                                    | 2.171695 |
| P46781                         | 40S riboso                           | MPVARSW                                        | 5                                          | 1                                                                      | 1                                                                | 1                    | 194 | 22.6                 | 10.65                                                                     | 199.3                                                                                | 93.2                                                                                     | 2.138412 |
| P05109                         | Protein S10                          | MLTELEKA                                       | 56                                         | 7                                                                      | 131                                                              | 7                    | 93  | 10.8                 | 7.03                                                                      | 16271.7                                                                              | 7687.1                                                                                   | 2.116754 |
| B2RA03                         | cDNA, FLJ9                           | MSFTTRSTI                                      | 7                                          | 3                                                                      | 20                                                               | 1                    | 430 | 48                   | 5.38                                                                      | 84.5                                                                                 | 40.2                                                                                     | 2.10199  |
| P13647                         | Keratin, ty                          | MSRQSSVS                                       | 18                                         | 11                                                                     | 34                                                               | 4                    | 590 | 62.3                 | 7.74                                                                      | 22.9                                                                                 | 11                                                                                       | 2.081818 |
| P05787                         | Keratin, ty                          | MSIRVTQK                                       | 18                                         | 10                                                                     | 40                                                               | 6                    | 483 | 53.7                 | 5.59                                                                      | 784.1                                                                                | 378.4                                                                                    | 2.072146 |
| B4E1C2                         | Kininogen                            | MKLITILFLC                                     | 36                                         | 27                                                                     | 3259                                                             | 1                    | 644 | 71.9                 | 6.81                                                                      | 341.5                                                                                | 167.9                                                                                    | 2.033949 |
| A0A075B6                       | Ig lambda-                           | XQPKAAPS                                       | 48                                         | 4                                                                      | 1262                                                             | 1                    | 106 | 11.3                 | 8.29                                                                      | 249.4                                                                                | 126.3                                                                                    | 1.974663 |
| P02763                         | Alpha-1-ac                           | MALSWVL                                        | 40                                         | 7                                                                      | 965                                                              | 5                    | 201 | 23.5                 | 5.02                                                                      | 95028.1                                                                              | 48390.7                                                                                  | 1.963768 |
| A1A4E9                         | Keratin 13                           | MSLRLQSS                                       | 25                                         | 14                                                                     | 107                                                              | 9                    | 458 | 49.6                 | 4.96                                                                      | 6283.7                                                                               | 3225.2                                                                                   | 1.948313 |
| P08729                         | Keratin, ty                          | MSIHFSPV                                       | 9                                          | 5                                                                      | 14                                                               | 2                    | 469 | 51.4                 | 5.48                                                                      | 151.1                                                                                | 78.3                                                                                     | 1.929757 |

|           |                        |           |    |    |      |    |      |       |       |         |         |          |
|-----------|------------------------|-----------|----|----|------|----|------|-------|-------|---------|---------|----------|
| B2R4M6    | Protein S100           | MTCKMSQ   | 52 | 6  | 80   | 6  | 114  | 13.2  | 6.13  | 9257.9  | 4812.2  | 1.923839 |
| P02750    | Leucine-rich           | MSSWSRQ   | 28 | 9  | 294  | 9  | 347  | 38.2  | 6.95  | 35646.8 | 19100   | 1.866325 |
| P25815    | Protein S100           | MTELETAM  | 24 | 2  | 14   | 2  | 95   | 10.4  | 4.88  | 1676.1  | 900.9   | 1.860473 |
| A0A0S2Z42 | HCG20398               | MASTSTTIF | 24 | 14 | 53   | 6  | 564  | 60    | 8     | 3741.2  | 2019.2  | 1.852813 |
| A0A024RD  | Lymphocyte             | MARGSVSD  | 14 | 8  | 34   | 5  | 627  | 70.2  | 5.43  | 1142.3  | 623.7   | 1.831489 |
| P12724    | Eosinophil             | MVPKLFTS  | 17 | 2  | 5    | 2  | 160  | 18.4  | 10.02 | 136.5   | 77.9    | 1.752246 |
| A0A140VK  | Transaldolase          | MSSSPVKR  | 6  | 2  | 5    | 2  | 337  | 37.5  | 6.81  | 364.6   | 211     | 1.727962 |
| P52209    | 6-phosphoglu           | MAQADIAL  | 7  | 3  | 7    | 3  | 483  | 53.1  | 7.23  | 66.1    | 38.5    | 1.716883 |
| P08246    | Neutrophil             | MTLGRRLA  | 6  | 2  | 11   | 2  | 267  | 28.5  | 9.35  | 579     | 343.6   | 1.685099 |
| A0A024R3  | Apolipoprotein         | MKAAVLTL  | 60 | 16 | 172  | 16 | 267  | 30.8  | 5.76  | 9385.9  | 5583.4  | 1.681037 |
| P19652    | Alpha-1-acid           | MALSWVL   | 47 | 8  | 469  | 6  | 201  | 23.6  | 5.11  | 54229.9 | 32592.2 | 1.663892 |
| P18428    | Lipopolysacchar        | MGALARAI  | 5  | 2  | 9    | 2  | 481  | 53.4  | 6.7   | 428.6   | 258     | 1.66124  |
| Q9H804    | cDNA FLJ14828          | MPGPRVW   | 22 | 8  | 58   | 1  | 438  | 48    | 7.46  | 358.9   | 216.2   | 1.660037 |
| P05164    | Myeloperoxidase        | MGVPPFSS  | 20 | 13 | 48   | 13 | 745  | 83.8  | 8.97  | 2311.4  | 1404.2  | 1.646062 |
| P48547    | Potassium channel      | MGQGDES   | 3  | 1  | 2    | 1  | 511  | 57.9  | 6.58  | 31      | 19      | 1.631579 |
| B2R9K8    | cDNA, FLJ92737         | MAAVKTLN  | 2  | 1  | 1    | 1  | 531  | 57.9  | 6.8   | 27.8    | 17.3    | 1.606936 |
| A0A024R6  | Alpha-1-antitrypsin    | MPSSVSWC  | 53 | 24 | 629  | 1  | 418  | 46.7  | 5.59  | 49272.2 | 30932.8 | 1.592879 |
| Q9UL84    | Myosin-related         | EVQLVESG  | 28 | 3  | 29   | 2  | 122  | 13.6  | 8.46  | 343.2   | 216.8   | 1.583026 |
| A8K5I6    | cDNA FLJ75837          | MPQLLQNI  | 11 | 5  | 24   | 5  | 495  | 53.5  | 6.1   | 2625.8  | 1669.6  | 1.572712 |
| P29373    | Cellular reticulum     | MPNFSGNV  | 7  | 1  | 4    | 1  | 138  | 15.7  | 5.4   | 50.4    | 32.7    | 1.541284 |
| A0A087WV  | Proline-rich           | MWRGIDSI  | 10 | 1  | 4    | 1  | 147  | 16.9  | 7.52  | 579.7   | 379.1   | 1.529148 |
| A0A161I20 | Lactoferrin            | MKLVFLVL  | 54 | 34 | 466  | 0  | 711  | 78.3  | 8.18  | 23066.2 | 15145.7 | 1.522954 |
| V9HWA9    | Epididymis             | MGPTSGPS  | 35 | 55 | 305  | 55 | 1663 | 187   | 6.4   | 16259.6 | 10679.9 | 1.522449 |
| Q5EFE6    | Anti-RhD non           | MRVPAQLI  | 40 | 6  | 2769 | 1  | 234  | 25.7  | 8.43  | 99.8    | 66      | 1.512121 |
| A0A024R0  | Complemen              | MSACWSF   | 16 | 8  | 49   | 8  | 559  | 63.2  | 5.52  | 1810.6  | 1203    | 1.505071 |
| A0A0B4J2  | Immunoglobulin         | MDMRVPA   | 14 | 1  | 7    | 1  | 117  | 12.6  | 7.84  | 67.6    | 101.1   | 0.668645 |
| G8JLH6    | Tetraspanin            | MPVKGGTI  | 7  | 3  | 62   | 3  | 228  | 25.4  | 6.52  | 4966.4  | 7477.1  | 0.664215 |
| Q5T1S8    | Noncompaction          | MTTATPLG  | 7  | 1  | 16   | 1  | 102  | 11.1  | 9.86  | 1851.4  | 2795.3  | 0.662326 |
| P55107    | Growth/differentiation | MAHVPAR   | 3  | 1  | 2    | 1  | 478  | 53.1  | 9.51  | 155     | 234.2   | 0.661827 |
| Q5HYL0    | Putative ur            | MQRAVPE   | 1  | 1  | 2    | 1  | 967  | 105.3 | 6.83  | 32.2    | 48.9    | 0.658487 |
| Q9HC84    | Mucin-5B (acidic)      | MGAPSACF  | 2  | 4  | 11   | 4  | 5762 | 596   | 6.64  | 538.9   | 821.2   | 0.656235 |
| P61604    | 10 kDa heat shock      | MAGQAFR   | 30 | 3  | 3    | 3  | 102  | 10.9  | 8.92  | 63.5    | 96.8    | 0.655992 |
| A0A024RB  | Solute carrier         | MMGSPVS   | 2  | 1  | 2    | 1  | 540  | 56.4  | 6.83  | 42.8    | 65.3    | 0.655436 |

|          |              |           |    |    |      |    |      |       |      |          |          |          |
|----------|--------------|-----------|----|----|------|----|------|-------|------|----------|----------|----------|
| Q6UX06   | Olfactome    | MRPGLSFL  | 21 | 10 | 125  | 10 | 510  | 57.2  | 5.69 | 4205.4   | 6418.7   | 0.655179 |
| O00526   | Uroplakin-   | MAPLLPIRT | 16 | 2  | 4    | 2  | 184  | 19.4  | 10.4 | 111.1    | 169.9    | 0.653914 |
| A0A024R6 | Delta-like 1 | MTATEALL  | 11 | 3  | 41   | 3  | 383  | 41.2  | 5.53 | 4609.3   | 7066.9   | 0.652238 |
| X6RBG4   | Uromoduli    | MRHIMTRI  | 39 | 23 | 3450 | 23 | 689  | 75.6  | 5.87 | 237342.9 | 364524.4 | 0.651103 |
| Q96FE5   | Leucine-ric  | MQVSKRM   | 2  | 1  | 17   | 1  | 620  | 69.8  | 8.56 | 379.8    | 587.4    | 0.646578 |
| P51159   | Ras-relatec  | MSDGDYD   | 4  | 1  | 2    | 1  | 221  | 24.9  | 5.22 | 123.1    | 190.9    | 0.644484 |
| Q99835   | Smoothenc    | MAAARPAI  | 1  | 1  | 4    | 1  | 787  | 86.3  | 8.34 | 232.8    | 361.7    | 0.643627 |
| P22732   | Solute carr  | MEQQDQS   | 6  | 3  | 22   | 3  | 501  | 54.9  | 6.04 | 903.4    | 1407.4   | 0.641893 |
| P23468   | Receptor-t   | MVHVARLI  | 2  | 3  | 3    | 2  | 1912 | 214.6 | 6.57 | 31       | 48.4     | 0.640496 |
| B4DM05   | cDNA FLJ5    | MLASSSRIF | 17 | 12 | 155  | 2  | 726  | 79.3  | 4.97 | 2472.9   | 3873.7   | 0.638382 |
| B2R880   | cDNA, FLJ9   | MANCEFSP  | 4  | 1  | 3    | 1  | 300  | 34.3  | 7.47 | 28.1     | 44.1     | 0.637188 |
| Q96ID5   | Immunogl     | MRTAPSLR  | 2  | 1  | 1    | 1  | 467  | 51.8  | 6.93 | 22.6     | 35.5     | 0.63662  |
| P06870   | Kallikrein-1 | MWFLVLCI  | 23 | 6  | 493  | 6  | 262  | 28.9  | 4.83 | 19938.5  | 31904.2  | 0.624949 |
| O95460   | Matrilin-4   | MRGLLCW   | 4  | 2  | 21   | 2  | 622  | 68.4  | 6.1  | 491.1    | 789.3    | 0.622197 |
| Q13508   | Ecto-ADP-r   | MKTGHFEI  | 5  | 2  | 58   | 2  | 389  | 43.9  | 6.06 | 2456.4   | 3963.6   | 0.61974  |
| A1L471   | ATP-bindin   | MDLEGDRF  | 2  | 2  | 3    | 2  | 1280 | 141.4 | 9    | 74       | 121      | 0.61157  |
| P55000   | Secreted L   | MASRWAV   | 61 | 3  | 21   | 3  | 103  | 11.2  | 5.33 | 399.8    | 663.4    | 0.602653 |
| B2RDY9   | Adenylyl c   | MADMQNI   | 4  | 2  | 2    | 2  | 475  | 51.6  | 8.22 | 157.4    | 273.4    | 0.575713 |
| A0A096LN | Uncharacte   | MALTKMLI  | 6  | 1  | 6    | 1  | 201  | 23.3  | 9.38 | 151      | 272.3    | 0.554535 |
| Q8N4F0   | BPI fold-co  | MAWASRL   | 7  | 3  | 15   | 3  | 458  | 49.1  | 8.72 | 538.1    | 975      | 0.551897 |
| O43653   | Prostate st  | MKAVLLAL  | 22 | 2  | 164  | 2  | 123  | 12.9  | 5.29 | 7892.3   | 14644.6  | 0.538922 |
| O60662   | Kelch-like p | MDSQRELA  | 1  | 1  | 2    | 1  | 606  | 68    | 5.29 | 100.6    | 188      | 0.535106 |
| B7ZLW2   | HE LZ prote  | MEDRRAEK  | 1  | 1  | 2    | 1  | 1943 | 219   | 7.42 | 12.8     | 24.3     | 0.526749 |
| Q96AX9   | E3 ubiquiti  | MGWKPSE   | 1  | 1  | 4    | 1  | 1013 | 109.9 | 8.44 | 45.5     | 88.1     | 0.516459 |
| M0R1F0   | Prostate-sp  | XFLTLSVTM | 52 | 10 | 493  | 9  | 262  | 28.6  | 7.44 | 16496.1  | 34544.1  | 0.477537 |
| B2R7D1   | cDNA, FLJ9   | MMDASKE   | 2  | 2  | 7    | 2  | 684  | 77.1  | 6.76 | 17.2     | 39.4     | 0.436548 |
| Q5IWS5   | Intelectin 1 | MNQLSFLI  | 16 | 4  | 13   | 4  | 313  | 35    | 5.82 | 316.1    | 793.9    | 0.398161 |
| P15309   | Prostatic a  | MRAAPLLL  | 32 | 13 | 827  | 13 | 386  | 44.5  | 6.24 | 22654.6  | 60390    | 0.375138 |
| B2R597   | cDNA, FLJ9   | MNVLLGSV  | 14 | 2  | 78   | 2  | 114  | 12.8  | 5.5  | 4333.9   | 12181.9  | 0.355766 |
