# Supplementary material for: LC‐MS/MS‐Based Quantitative Proteomics Analysis of Different Stages of Non‐Small‐Cell Lung Cancer
Source: Hindawi journal article supplement (doi:10.1155/2021/5561569), 2021-01-01
Supplement: f3 [file 5561569.f3.pdf]

| Uniprot Acc | protiens                      | 121      | 113      | ratio(113/121) | 114      | ratio(114/121) | 115       | ratio(115/121) | 116      | ratio(116/121) | 117      | ratio(117/121) | 118      | ratio(118/121) | 119      | ratio(119/121) |
|-------------|-------------------------------|----------|----------|----------------|----------|----------------|-----------|----------------|----------|----------------|----------|----------------|----------|----------------|----------|----------------|
| P02768      | Serum albumin OS=Homo s       | 666397.2 | 862466.6 | 1.29           | 593482.1 | 0.89           | 2220420.5 | 3.33           | 846469.3 | 1.27           | 634302.5 | 0.95           | 736961.1 | 1.11           | 842297.5 | 1.26           |
| P02760      | Protein AMBP OS=Homo s        | 381627.7 | 294812.3 | 0.77           | 474165.8 | 1.24           | 203377.3  | 0.53           | 349197.6 | 0.92           | 346271.7 | 0.91           | 328356.1 | 0.86           | 411229.3 | 1.08           |
| B4E1B2      | cDNA FLJ53691, highly sin     | 78511.8  | 107560.1 | 1.37           | 85218.8  | 1.09           | 199640.4  | 2.54           | 90022.3  | 1.15           | 73427.3  | 0.94           | 82722    | 1.05           | 102491.8 | 1.31           |
| A0A0K0K1    | Epididymis secretory sperm    | 3358.1   | 4584.8   | 1.37           | 4234.8   | 1.26           | 8496.1    | 2.53           | 4193.7   | 1.25           | 3507.1   | 1.04           | 3632.2   | 1.08           | 4873.3   | 1.45           |
| D3DNU8      | Kininogen 1, isoform CRA_     | 302648.3 | 294936.6 | 0.97           | 257956.9 | 0.85           | 193831.3  | 0.64           | 290406.7 | 0.96           | 313453.3 | 1.04           | 279805.5 | 0.92           | 228883.9 | 0.76           |
| B4E1C2      | Kininogen 1, isoform CRA_     | 167.9    | 229.7    | 1.37           | 263.2    | 1.57           | 278       | 1.66           | 326      | 1.94           | 265.5    | 1.58           | 290.3    | 1.73           | 341.5    | 2.03           |
| O60494      | Cubilin OS=Homo sapiens       | 40132.6  | 45037.5  | 1.12           | 38654.5  | 0.96           | 34055.8   | 0.85           | 39708.6  | 0.99           | 44702.9  | 1.11           | 45025.7  | 1.12           | 32701.3  | 0.81           |
| P98164      | Low-density lipoprotein rec   | 40915.4  | 45344.8  | 1.11           | 35817.7  | 0.88           | 35721.8   | 0.87           | 42157.7  | 1.03           | 46693.4  | 1.14           | 48624    | 1.19           | 38847.7  | 0.95           |
| A0A024RA    | Heparan sulfate proteoglyca   | 46985.3  | 43536.1  | 0.93           | 49827.7  | 1.06           | 33964.3   | 0.72           | 44780.9  | 0.95           | 46858.6  | 1.00           | 47703.5  | 1.02           | 37785.7  | 0.80           |
| P01133      | Pro-epidermal growth factor   | 75270.8  | 73109.5  | 0.97           | 66336.1  | 0.88           | 56680.9   | 0.75           | 70877.8  | 0.94           | 76444.3  | 1.02           | 81110.3  | 1.08           | 65749.7  | 0.87           |
| Q6N093      | Putative uncharacterized pr   | 47825.3  | 55632.5  | 1.16           | 48428.3  | 1.01           | 63601.5   | 1.33           | 65204.2  | 1.36           | 59384.5  | 1.24           | 40148.4  | 0.84           | 58939.1  | 1.23           |
| X6RBG4      | Uromodulin OS=Homo sapi       | 364524.4 | 267652.8 | 0.73           | 169355   | 0.46           | 173051.8  | 0.47           | 249815.6 | 0.69           | 272871.5 | 0.75           | 323278.4 | 0.89           | 237342.9 | 0.65           |
| S4R471      | Protein AMBP (Fragment)       | 913.4    | 830.2    | 0.91           | 1013.7   | 1.11           | 501.8     | 0.55           | 900.2    | 0.99           | 865.2    | 0.95           | 813.1    | 0.89           | 1077     | 1.18           |
| Q6MZQ6      | Putative uncharacterized pr   | 150720   | 156851.3 | 1.04           | 141749.9 | 0.94           | 138599.9  | 0.92           | 186246.8 | 1.24           | 144680.4 | 0.96           | 140760.2 | 0.93           | 177689.2 | 1.18           |
| A0A024R4    | Fibronectin 1, isoform CRA    | 23276.7  | 23599.9  | 1.01           | 22486.3  | 0.97           | 17512.3   | 0.75           | 26256.4  | 1.13           | 24031.8  | 1.03           | 23591    | 1.01           | 23870.8  | 1.03           |
| P04746      | Pancreatic alpha-amylase O    | 2613.9   | 3567.6   | 1.36           | 1554.5   | 0.59           | 3116.9    | 1.19           | 3014.4   | 1.15           | 3868.6   | 1.48           | 3474.2   | 1.33           | 2469.6   | 0.94           |
| P01833      | Polymeric immunoglobulin      | 75401.1  | 65223.8  | 0.87           | 51222.8  | 0.68           | 44831.7   | 0.59           | 57440.9  | 0.76           | 84481.8  | 1.12           | 65065.7  | 0.86           | 60349.2  | 0.80           |
| V9HW34      | Epididymis luminal protein    | 908.7    | 787.8    | 0.87           | 1077.1   | 1.19           | 619       | 0.68           | 873.4    | 0.96           | 900.6    | 0.99           | 903.4    | 0.99           | 875.5    | 0.96           |
| Q6PIL8      | IGK@ protein OS=Homo sa       | 3364.6   | 3026.6   | 0.90           | 3563     | 1.06           | 2074.2    | 0.62           | 2760.8   | 0.82           | 3139.4   | 0.93           | 3486.2   | 1.04           | 3443.1   | 1.02           |
| Q6P5S8      | IGK@ protein OS=Homo sa       | 183839.5 | 151922.2 | 0.83           | 222216.3 | 1.21           | 121290.3  | 0.66           | 166687   | 0.91           | 160695.3 | 0.87           | 198000.3 | 1.08           | 194547.5 | 1.06           |
| Q0KKI6      | Immunoglobulin light chain    | 4700.9   | 3800.1   | 0.81           | 4394.4   | 0.93           | 2855.3    | 0.61           | 3317     | 0.71           | 4193.4   | 0.89           | 4965.8   | 1.06           | 4898.1   | 1.04           |
| Q59E93      | Membrane alanine aminope      | 32198.4  | 34854.5  | 1.08           | 27418    | 0.85           | 27084.2   | 0.84           | 34101    | 1.06           | 35756.3  | 1.11           | 28833.9  | 0.90           | 28075.9  | 0.87           |
| B7ZMD7      | Alpha-amylase OS=Homo s       | 26254.5  | 36477.1  | 1.39           | 19818.9  | 0.75           | 29799.8   | 1.14           | 33533.9  | 1.28           | 37893.7  | 1.44           | 36147.9  | 1.38           | 26885.5  | 1.02           |
| A0A161I20   | Lactoferrin OS=Homo sapi      | 15145.7  | 39936.6  | 2.64           | 20213.2  | 1.33           | 13042.9   | 0.86           | 22989.8  | 1.52           | 19645.5  | 1.30           | 23345.6  | 1.54           | 23066.2  | 1.52           |
| A0A024R8    | Glucosidase, alpha acid (Po   | 26196.1  | 26278.3  | 1.00           | 20740.9  | 0.79           | 19305.1   | 0.74           | 24136.9  | 0.92           | 25723    | 0.98           | 25941.7  | 0.99           | 21714.1  | 0.83           |
| P00734      | Prothrombin OS=Homo sap       | 39265.9  | 36023.3  | 0.92           | 30475.5  | 0.78           | 25009.6   | 0.64           | 33369.7  | 0.85           | 35911.5  | 0.91           | 37733    | 0.96           | 35981.5  | 0.92           |
| Q96K68      | cDNA FLJ14473 fis, clone      | 63862.1  | 60465.5  | 0.95           | 47280    | 0.74           | 46205.5   | 0.72           | 55632    | 0.87           | 65877.7  | 1.03           | 56589.8  | 0.89           | 57673.3  | 0.90           |
| B3VMW0      | Lactoferrin OS=Homo sapi      |          |          |                |          |                |           |                |          |                |          |                |          |                |          |                |
| W8QEY1      | Lactoferrin OS=Homo sapi      | 203      | 227.3    | 1.12           | 174.7    | 0.86           | 186.3     | 0.92           | 323.9    | 1.60           | 207.4    | 1.02           | 189.2    | 0.93           | 220.6    | 1.09           |
| V9HWA9      | Epididymis secretory sperm    | 10679.9  | 17774.3  | 1.66           | 14518.8  | 1.36           | 19834.7   | 1.86           | 14532.1  | 1.36           | 11925    | 1.12           | 17333.2  | 1.62           | 16259.6  | 1.52           |
| Q5EFE6      | Anti-RhD monoclonal T125      | 66       | 63.8     | 0.97           | 94.1     | 1.43           | 46.1      | 0.70           | 87.4     | 1.32           | 55.9     | 0.85           | 65.6     | 0.99           | 99.8     | 1.51           |
| A0A024RD    | Secreted phosphoprotein 1 (   | 70922.1  | 58597    | 0.83           | 41336.7  | 0.58           | 33620     | 0.47           | 55794.7  | 0.79           | 61223.2  | 0.86           | 73467.6  | 1.04           | 49830.6  | 0.70           |
| Q59EG0      | Basement membrane-specifi     | 1737.4   | 1510.7   | 0.87           | 1463.9   | 0.84           | 1070.7    | 0.62           | 2426.2   | 1.40           | 2042.3   | 1.18           | 3369.3   | 1.94           | 1566.4   | 0.90           |
| A0A140TA    | Tenascin-X OS=Homo sapi       | 15142.2  | 15479.7  | 1.02           | 13776.6  | 0.91           | 11588.2   | 0.77           | 14985.1  | 0.99           | 15236.8  | 1.01           | 14675.1  | 0.97           | 12717    | 0.84           |
| Q6N092      | Putative uncharacterized pr   | 292.1    | 212.3    | 0.73           | 170.6    | 0.58           | 187.3     | 0.64           | 215.6    | 0.74           | 195.9    | 0.67           | 161.8    | 0.55           | 243      | 0.83           |
| Q8NCL6      | cDNA FLJ90170 fis, clone      | 95.9     | 111.4    | 1.16           | 103.6    | 1.08           | 88.7      | 0.92           | 97       | 1.01           | 97.6     | 1.02           | 94.8     | 0.99           | 97.1     | 1.01           |
| E9KL23      | Epididymis secretory sperm    | 1716     | 2619.7   | 1.53           | 1850.8   | 1.08           | 4131.1    | 2.41           | 1940.5   | 1.13           | 1781.5   | 1.04           | 1987.8   | 1.16           | 2198.3   | 1.28           |
| P25311      | Zinc-alpha-2-glycoprotein C   | 151729.7 | 103361.5 | 0.68           | 236874.5 | 1.56           | 90208.1   | 0.59           | 112762.6 | 0.74           | 114953.3 | 0.76           | 87034.2  | 0.57           | 132935.6 | 0.88           |
| A0A024RD    | Secreted phosphoprotein 1 (   | 9894.7   | 7830     | 0.79           | 6811.9   | 0.69           | 4818.4    | 0.49           | 8363.9   | 0.85           | 8910.8   | 0.90           | 10063.6  | 1.02           | 8087.2   | 0.82           |
| A0A024R6    | Alpha-1-antitrypsin OS=Ho     | 30932.8  | 44423.8  | 1.44           | 33176.1  | 1.07           | 80233.1   | 2.59           | 38125.8  | 1.23           | 36761.6  | 1.19           | 37927.4  | 1.23           | 49272.2  | 1.59           |
| P35555      | Fibrillin-1 OS=Homo sapi      | 24928.2  | 24349.7  | 0.98           | 20530    | 0.82           | 19914.2   | 0.80           | 23308.7  | 0.94           | 24593.8  | 0.99           | 22820.3  | 0.92           | 21604.6  | 0.87           |
| P12109      | Collagen alpha-1(VI) chain    | 31949.7  | 33324.9  | 1.04           | 28063    | 0.88           | 23704.5   | 0.74           | 29432.1  | 0.92           | 35827.7  | 1.12           | 35265.8  | 1.10           | 28378.3  | 0.89           |
| A8KAJ3      | cDNA FLJ77823, highly sin     | 26275.3  | 24208.6  | 0.92           | 28686.9  | 1.09           | 17831.4   | 0.68           | 24959.9  | 0.95           | 27916.5  | 1.06           | 24654.5  | 0.94           | 21521.2  | 0.82           |
| A0A0S2Z3    | Lectin galactoside-binding s  | 27682.3  | 24440.8  | 0.88           | 21860.8  | 0.79           | 20279.5   | 0.73           | 22939.6  | 0.83           | 26958.2  | 0.97           | 29734.9  | 1.07           | 24870.3  | 0.90           |
| E7ER45      | Maltase-glucoamylase, intes   | 17395.7  | 20741    | 1.19           | 15799.2  | 0.91           | 15308.5   | 0.88           | 19737.9  | 1.13           | 19120.9  | 1.10           | 20698.3  | 1.19           | 17321    | 1.00           |
| A0A024R8    | Prostaglandin D2 synthase 2   | 157265.4 | 132959.1 | 0.85           | 249501.5 | 1.59           | 92848.1   | 0.59           | 168444.8 | 1.07           | 144643.5 | 0.92           | 167428.8 | 1.06           | 131771.6 | 0.84           |
| P15309      | Prostatic acid phosphatase C  | 60390    | 44629.5  | 0.74           | 66404    | 1.10           | 57259.6   | 0.95           | 45211.6  | 0.75           | 65647.6  | 1.09           | 24586.7  | 0.41           | 22654.6  | 0.38           |
| P02763      | Alpha-1-acid glycoprotein 1   | 48390.7  | 35706.4  | 0.74           | 76375    | 1.58           | 34617.4   | 0.72           | 42550.7  | 0.88           | 30650.9  | 0.63           | 32510.1  | 0.67           | 95028.1  | 1.96           |
| A8K5A4      | cDNA FLJ76826, highly sin     | 14909.8  | 16788.8  | 1.13           | 14281.1  | 0.96           | 18971.2   | 1.27           | 15934.6  | 1.07           | 14697.8  | 0.99           | 16077.5  | 1.08           | 20626.8  | 1.38           |
| A0A0S2Z3    | EGF containing fibulin-like   | 118.6    | 164.5    | 1.39           | 149.8    | 1.26           | 117.7     | 0.99           | 158      | 1.33           | 151.2    | 1.27           | 239.5    | 2.02           | 123.5    | 1.04           |
| P01861      | Ig gamma-4 chain C region     | 4247.9   | 4652.6   | 1.10           | 6314.7   | 1.49           | 6267.9    | 1.48           | 4620.4   | 1.09           | 4081.8   | 0.96           | 4058.3   | 0.96           | 5555.8   | 1.31           |
| A0A024R6    | Serpin peptidase inhibitor, c | 27414.4  | 30478.7  | 1.11           | 25865.8  | 0.94           | 26139.5   | 0.95           | 30958.3  | 1.13           | 33303.9  | 1.21           | 33812    | 1.23           | 29852    | 1.09           |
| Q16270      | Insulin-like growth factor-bi | 39312.4  | 38283.2  | 0.97           | 32001.3  | 0.81           | 27463.2   | 0.70           | 32943.9  | 0.84           | 37954.8  | 0.97           | 37956.2  | 0.97           | 29811.2  | 0.76           |
| A0A024RD    | Secreted phosphoprotein 1 (   | 86.6     | 77.9     | 0.90           | 67.3     | 0.78           | 75.4      | 0.87           | 76.2     | 0.88           | 78.8     | 0.91           | 98       | 1.13           | 74.1     | 0.86           |
| P04279      | Semenogelin-1 OS=Homo s       | 12317.9  | 16697.1  | 1.36           | 19411.5  | 1.58           | 10585.7   | 0.86           | 60356.9  | 4.90           | 13960    | 1.13           | 9603.9   | 0.78           | 8685.3   | 0.71           |
| P00738      | Haptoglobin OS=Homo sap       | 22466.7  | 23271.4  | 1.04           | 32501.8  | 1.45           | 26124.5   | 1.16           | 22935.7  | 1.02           | 18392    | 0.82           | 29883.6  | 1.33           | 86108.9  | 3.83           |
| A0A0G2JPF   | Complement C4-A OS=Hor        | 7727.2   | 8787.4   | 1.14           | 9127.2   | 1.18           | 7777.3    | 1.01           | 8628.3   | 1.12           | 9221.3   | 1.19           | 9747     | 1.26           | 9042     | 1.17           |

|        |                               |          |          |      |          |      |         |      |          |      |          |      |          |      |          |      |
|--------|-------------------------------|----------|----------|------|----------|------|---------|------|----------|------|----------|------|----------|------|----------|------|
| W0UV60 | Ribonuclease A F3 OS=Hor      | 45540.4  | 40770.4  | 0.90 | 50060    | 1.10 | 31349.3 | 0.69 | 49333.6  | 1.08 | 39027.6  | 0.86 | 51040    | 1.12 | 35397.7  | 0.78 |
| P0COL5 | Complement C4-B OS=Hor        | 344.9    | 332.7    | 0.96 | 299      | 0.87 | 292.7   | 0.85 | 364.7    | 1.06 | 344.8    | 1.00 | 388.6    | 1.13 | 450.4    | 1.31 |
| O75882 | Attractin OS=Homo sapiens     | 12416    | 12022.7  | 0.97 | 10543.3  | 0.85 | 9668.8  | 0.78 | 11707.2  | 0.94 | 12428.8  | 1.00 | 11456.7  | 0.92 | 10342.8  | 0.83 |
| A8K3U3 | cDNA FLJ77863, highly sin     | 27654.4  | 29720.3  | 1.07 | 38789.3  | 1.40 | 23338.3 | 0.84 | 31760.1  | 1.15 | 30231.1  | 1.09 | 39678.5  | 1.43 | 27395.3  | 0.99 |
| P02790 | Hemopexin OS=Homo sapi        | 27113.3  | 30288.1  | 1.12 | 32208    | 1.19 | 29317.9 | 1.08 | 26373    | 0.97 | 27211.1  | 1.00 | 29882.3  | 1.10 | 30681.3  | 1.13 |
| P10909 | Clusterin OS=Homo sapiens     | 29940.2  | 32485.9  | 1.09 | 31163    | 1.04 | 27176   | 0.91 | 31832.6  | 1.06 | 38559.5  | 1.29 | 33439.7  | 1.12 | 32173.1  | 1.07 |
| A8K7T4 | cDNA FLJ75774, highly sin     | 57175.3  | 51924.6  | 0.91 | 60344.1  | 1.06 | 37340.5 | 0.65 | 58631.6  | 1.03 | 57770.6  | 1.01 | 63919.2  | 1.12 | 64303.9  | 1.12 |
| P54802 | Alpha-N-acetylglucosaminic    | 8664.6   | 9813.9   | 1.13 | 7723.2   | 0.89 | 6953.8  | 0.80 | 8759.3   | 1.01 | 9550.4   | 1.10 | 8998.8   | 1.04 | 7625.2   | 0.88 |
| P63261 | Actin, cytoplasmic 2 OS=H     | 11164.5  | 16761    | 1.50 | 11559.1  | 1.04 | 10082.5 | 0.90 | 12801.4  | 1.15 | 16140    | 1.45 | 15279.7  | 1.37 | 13624    | 1.22 |
| E9PGN7 | Plasma protease C1 inhibito   | 37295.4  | 38639.8  | 1.04 | 32778.5  | 0.88 | 29434.6 | 0.79 | 35619.4  | 0.96 | 43925.7  | 1.18 | 38370.4  | 1.03 | 33662.9  | 0.90 |
| S6BGD6 | IgG L chain OS=Homo sapi      | 1427.4   | 1291.3   | 0.90 | 1704.5   | 1.19 | 1076.6  | 0.75 | 1469.4   | 1.03 | 1395.2   | 0.98 | 1573.3   | 1.10 | 1729.3   | 1.21 |
| P06396 | Gelsolin OS=Homo sapiens      | 25485.9  | 22734.5  | 0.89 | 33262.8  | 1.31 | 17664.8 | 0.69 | 27384.1  | 1.07 | 28500    | 1.12 | 26508.5  | 1.04 | 25927.5  | 1.02 |
| P00747 | Plasminogen OS=Homo sap       | 15357.1  | 16945.7  | 1.10 | 16062.8  | 1.05 | 14786.9 | 0.96 | 15645.1  | 1.02 | 16065.9  | 1.05 | 14859.2  | 0.97 | 17672.5  | 1.15 |
| B7ZKJ8 | ITIH4 protein OS=Homo sa      | 35519.9  | 36663.7  | 1.03 | 32179.9  | 0.91 | 31430.2 | 0.88 | 38048    | 1.07 | 39069.7  | 1.10 | 40363    | 1.14 | 40159    | 1.13 |
| Q8N355 | IGL@ protein OS=Homo sa       | 194.2    | 138.3    | 0.71 | 270.6    | 1.39 | 104     | 0.54 | 167.5    | 0.86 | 126.6    | 0.65 | 135      | 0.70 | 176.5    | 0.91 |
| B4DPH5 | cDNA FLJ55496, highly sin     | 31.5     | 22.1     | 0.70 | 22.6     | 0.72 | 36.2    | 1.15 | 46.9     | 1.49 | 25.7     | 0.82 | 16.7     | 0.53 | 38.3     | 1.22 |
| A2NUT2 | Lambda-chain (AA -20 to 2     | 101417.1 | 86013.1  | 0.85 | 177227.2 | 1.75 | 72587.9 | 0.72 | 126455.5 | 1.25 | 97513.4  | 0.96 | 122835.2 | 1.21 | 118501.6 | 1.17 |
| Q6GMV8 | Uncharacterized protein OS    | 4273.6   | 3551.6   | 0.83 | 6709.7   | 1.57 | 3229.9  | 0.76 | 4419.4   | 1.03 | 3762     | 0.88 | 5315.5   | 1.24 | 4920.8   | 1.15 |
| P05062 | Fructose-bisphosphate aldol   | 10140.5  | 14342.3  | 1.41 | 10885.6  | 1.07 | 8662.9  | 0.85 | 10906.9  | 1.08 | 14848.6  | 1.46 | 12235.8  | 1.21 | 10101.6  | 1.00 |
| B7Z6Q5 | Beta-galactosidase OS=Hon     | 6953.9   | 10000.1  | 1.44 | 5876.3   | 0.85 | 6354.8  | 0.91 | 8239.7   | 1.18 | 8969.4   | 1.29 | 9596.4   | 1.38 | 7496.3   | 1.08 |
| Q56917 | Uncharacterized protein OS    | 134.5    | 145.7    | 1.08 | 136.2    | 1.01 | 114     | 0.85 | 110.6    | 0.82 | 119.4    | 0.89 | 158.6    | 1.18 | 169.9    | 1.26 |
| S6B294 | IgG L chain OS=Homo sapi      | 43       | 44.7     | 1.04 | 58       | 1.35 | 40.4    | 0.94 | 38.9     | 0.90 | 48.2     | 1.12 | 39.1     | 0.91 | 43.1     | 1.00 |
| Q6GMX4 | IGL@ protein OS=Homo sa       | 479.1    | 500.4    | 1.04 | 544.7    | 1.14 | 460.9   | 0.96 | 521      | 1.09 | 464.8    | 0.97 | 528.8    | 1.10 | 551      | 1.15 |
| S6AWD6 | IgG L chain OS=Homo sapi      | 194.6    | 233.9    | 1.20 | 216.7    | 1.11 | 193.5   | 0.99 | 205.1    | 1.05 | 189.3    | 0.97 | 236.3    | 1.21 | 207.4    | 1.07 |
| S6AWD3 | IgG L chain OS=Homo sapi      | 830      | 1018     | 1.23 | 1199.2   | 1.44 | 751.7   | 0.91 | 1491.4   | 1.80 | 928.4    | 1.12 | 992.7    | 1.20 | 1199.5   | 1.45 |
| Q8NBJ4 | Golgi membrane protein 1 C    | 10165.7  | 9235.2   | 0.91 | 7610.4   | 0.75 | 7144.5  | 0.70 | 9294.5   | 0.91 | 10319.8  | 1.02 | 9231.9   | 0.91 | 7727.5   | 0.76 |
| S6BGE9 | IgG L chain OS=Homo sapi      | 2152.9   | 2212.7   | 1.03 | 2856     | 1.33 | 1550.1  | 0.72 | 2192.6   | 1.02 | 2079.4   | 0.97 | 2231     | 1.04 | 2508.7   | 1.17 |
| Q6IPQ0 | IGL@ protein OS=Homo sa       |          |          |      |          |      |         |      |          |      |          |      |          |      |          |      |
| V9HWI3 | Cathepsin D (Lysosomal asp    | 13018.8  | 15711.4  | 1.21 | 12359.9  | 0.95 | 11091.3 | 0.85 | 14318    | 1.10 | 17143.2  | 1.32 | 16500.5  | 1.27 | 14170.4  | 1.09 |
| Q6PIK1 | IGL@ protein OS=Homo sa       | 6906.4   | 6290.4   | 0.91 | 8731     | 1.26 | 5542.3  | 0.80 | 6796.3   | 0.98 | 6542     | 0.95 | 7580.1   | 1.10 | 7764.1   | 1.12 |
| D6RF35 | Vitamin D-binding protein C   | 14294.4  | 17327.4  | 1.21 | 13533.7  | 0.95 | 24489.9 | 1.71 | 15861.2  | 1.11 | 15123.2  | 1.06 | 15500.5  | 1.08 | 16584.4  | 1.16 |
| V9HWD8 | Epididymis secretory sperm    | 24056.7  | 21216.9  | 0.88 | 26602.6  | 1.11 | 21869.4 | 0.91 | 21043.9  | 0.87 | 20167.4  | 0.84 | 21694.9  | 0.90 | 31421    | 1.31 |
| P02749 | Beta-2-glycoprotein 1 OS=H    | 26758.6  | 22534.1  | 0.84 | 19621.2  | 0.73 | 12893.6 | 0.48 | 20707.4  | 0.77 | 27931.5  | 1.04 | 20500.3  | 0.77 | 20266.6  | 0.76 |
| D9ZGG2 | Vitronectin OS=Homo sapi      | 21122.6  | 21742.7  | 1.03 | 22367.4  | 1.06 | 14848.5 | 0.70 | 24088.8  | 1.14 | 22575.8  | 1.07 | 22267.7  | 1.05 | 25547.6  | 1.21 |
| Q5CZ94 | Putative uncharacterized pr   | 145.8    | 135.2    | 0.93 | 121.7    | 0.83 | 147.8   | 1.01 | 161.2    | 1.11 | 102.2    | 0.70 | 148.6    | 1.02 | 136.4    | 0.94 |
| Q6DHW4 | Uncharacterized protein OS    |          |          |      |          |      |         |      |          |      |          |      |          |      |          |      |
| B3KS79 | cDNA FLJ35730 fis, clone      | 16211.1  | 13162.9  | 0.81 | 14201.8  | 0.88 | 12691.8 | 0.78 | 14632.2  | 0.90 | 14459.7  | 0.89 | 13588.8  | 0.84 | 22531.2  | 1.39 |
| P07998 | Ribonuclease pancreatic OS    | 25347.2  | 20596.6  | 0.81 | 20328.4  | 0.80 | 13152.6 | 0.52 | 21895.2  | 0.86 | 21754.4  | 0.86 | 19182.2  | 0.76 | 17946.9  | 0.71 |
| C9JF17 | Apolipoprotein D (Fragmen     | 125321.7 | 116695.1 | 0.93 | 109434.1 | 0.87 | 75109.3 | 0.60 | 109701.3 | 0.88 | 141500.2 | 1.13 | 116202.4 | 0.93 | 121145   | 0.97 |
| Q8WZ75 | Roundabout homolog 4 OS=      | 13999.1  | 14015.7  | 1.00 | 12359.8  | 0.88 | 11027.9 | 0.79 | 13649.4  | 0.98 | 14279    | 1.02 | 16103.8  | 1.15 | 13958.1  | 1.00 |
| M0R1F0 | Prostate-specific antigen (Fr | 34544.1  | 32571.8  | 0.94 | 40315.5  | 1.17 | 30526   | 0.88 | 26632.8  | 0.77 | 29508.2  | 0.85 | 16031.4  | 0.46 | 16496.1  | 0.48 |
| Q6N030 | Uncharacterized protein OS    | 7211.3   | 5074.5   | 0.70 | 4738.1   | 0.66 | 5540.6  | 0.77 | 6024.4   | 0.84 | 6131     | 0.85 | 5122.6   | 0.71 | 7072.7   | 0.98 |
| Q8NFB8 | Cell adhesion molecule 4 O    | 9424.4   | 8883.2   | 0.94 | 8270.9   | 0.88 | 6499.1  | 0.69 | 9017.3   | 0.96 | 8820.9   | 0.94 | 9361.4   | 0.99 | 7196.8   | 0.76 |
| B7Z9B1 | cDNA FLJ52398, highly sin     | 28059.6  | 23981.7  | 0.85 | 26643.4  | 0.95 | 16251.4 | 0.58 | 25265.4  | 0.90 | 25342.3  | 0.90 | 24623.6  | 0.88 | 22206.7  | 0.79 |
| O94919 | Endonuclease domain-conta     | 9024.3   | 8326.9   | 0.92 | 11662    | 1.29 | 6551.2  | 0.73 | 8645.8   | 0.96 | 8894.1   | 0.99 | 8187     | 0.91 | 8210.1   | 0.91 |
| P02753 | Retinol-binding protein 4 O   | 26946    | 28771.5  | 1.07 | 58084.3  | 2.16 | 20772.3 | 0.77 | 29296.9  | 1.09 | 33777.9  | 1.25 | 30653.1  | 1.14 | 22817.5  | 0.85 |
| B7Z5V6 | cDNA FLJ57046, highly sin     | 2002.3   | 2519.2   | 1.26 | 1906.2   | 0.95 | 2285.5  | 1.14 | 1916.7   | 0.96 | 2317.2   | 1.16 | 2148.9   | 1.07 | 1547.7   | 0.77 |
| E9PR17 | CD59 glycoprotein OS=Hor      | 112175.1 | 90140.3  | 0.80 | 94116.1  | 0.84 | 66869   | 0.60 | 98283.8  | 0.88 | 104681.9 | 0.93 | 107610.9 | 0.96 | 86285.3  | 0.77 |
| O00391 | Sulfhydryl oxidase 1 OS=H     | 5955.7   | 6795.3   | 1.14 | 6010     | 1.01 | 5442    | 0.91 | 6302.2   | 1.06 | 6408.7   | 1.08 | 6427.3   | 1.08 | 5843.9   | 0.98 |
| P27487 | Dipeptidyl peptidase 4 OS=    | 8683.5   | 9130.5   | 1.05 | 8022.4   | 0.92 | 7844.8  | 0.90 | 9113.7   | 1.05 | 9502.2   | 1.09 | 8394.4   | 0.97 | 7506.1   | 0.86 |
| H6VRG1 | Keratin 1 OS=Homo sapien      | 9226.5   | 9476     | 1.03 | 6231.3   | 0.68 | 7005    | 0.76 | 5944.3   | 0.64 | 7754.1   | 0.84 | 8608.7   | 0.93 | 8670.3   | 0.94 |
| A8K335 | cDNA FLJ76254, highly sin     | 15333.5  | 17957    | 1.17 | 12883    | 0.84 | 11143.4 | 0.73 | 15620.3  | 1.02 | 18357.3  | 1.20 | 20282.1  | 1.32 | 15601.1  | 1.02 |
| B7Z8Q2 | cDNA FLJ55606, highly sin     | 31137.6  | 29115    | 0.94 | 47211    | 1.52 | 22248.8 | 0.71 | 32847    | 1.05 | 34937.8  | 1.12 | 31691.9  | 1.02 | 33256.5  | 1.07 |
| B2R582 | cDNA, FLJ92374, highly sin    | 589      | 535      | 0.91 | 463.1    | 0.79 | 497.3   | 0.84 | 429.5    | 0.73 | 579.2    | 0.98 | 442.2    | 0.75 | 445.4    | 0.76 |
| B2R888 | Monocyte differentiation an   | 22517.1  | 19350.3  | 0.86 | 34324.4  | 1.52 | 13265.4 | 0.59 | 21759.3  | 0.97 | 24036.9  | 1.07 | 22120.8  | 0.98 | 31587.4  | 1.40 |
| A8K3K1 | cDNA FLJ78096, highly sin     | 1132.8   | 1376.3   | 1.21 | 972.4    | 0.86 | 929.4   | 0.82 | 1205.8   | 1.06 | 1637.7   | 1.45 | 1245.8   | 1.10 | 1169.5   | 1.03 |
| B4E1Z4 | cDNA FLJ55673, highly sin     | 4174.9   | 5327     | 1.28 | 7433.3   | 1.78 | 3756.4  | 0.90 | 4316     | 1.03 | 5048.3   | 1.21 | 4986.3   | 1.19 | 4293     | 1.03 |
| A8K6Z6 | cDNA FLJ78262, highly sin     | 2968.1   | 3808.1   | 1.28 | 4746.6   | 1.60 | 2950.2  | 0.99 | 13370.1  | 4.50 | 3415.1   | 1.15 | 3196.1   | 1.08 | 2643.1   | 0.89 |



|           |                               |         |         |      |         |      |         |      |         |      |         |      |         |      |         |      |
|-----------|-------------------------------|---------|---------|------|---------|------|---------|------|---------|------|---------|------|---------|------|---------|------|
| D9YZU5    | Beta-globin OS=Homo sapi      | 8175.3  | 44720.1 | 5.47 | 11673.8 | 1.43 | 7891.1  | 0.97 | 10959.3 | 1.34 | 20029.3 | 2.45 | 18593.9 | 2.27 | 20856.2 | 2.55 |
| O00468    | Aggrin OS=Homo sapiens G      | 6549.9  | 6556.5  | 1.00 | 9170.1  | 1.40 | 5380.9  | 0.82 | 6510.6  | 0.99 | 6654.7  | 1.02 | 6845.8  | 1.05 | 6884.2  | 1.05 |
| E7ETH0    | Complement factor I OS=H      | 7242.1  | 7030    | 0.97 | 6804.8  | 0.94 | 6327.9  | 0.87 | 6590.3  | 0.91 | 7519.4  | 1.04 | 7774.9  | 1.07 | 6675.9  | 0.92 |
| A0A1B0GU  | Ig mu chain C region (Fragm   | 20735.1 | 23674.6 | 1.14 | 25076.2 | 1.21 | 19022.9 | 0.92 | 23987   | 1.16 | 25065.2 | 1.21 | 30377.4 | 1.47 | 22344.8 | 1.08 |
| B2RCQ6    | cDNA, FLJ96222, highly sim    | 5058.9  | 7840.2  | 1.55 | 5243.9  | 1.04 | 5523.3  | 1.09 | 5621.9  | 1.11 | 6657.2  | 1.32 | 6307    | 1.25 | 4825.4  | 0.95 |
| B7ZKY6    | Membrane metallo-endopep      | 6746.4  | 7337.4  | 1.09 | 6212    | 0.92 | 6066.5  | 0.90 | 6723.5  | 1.00 | 7573.8  | 1.12 | 6489.3  | 0.96 | 5345.8  | 0.79 |
| A0A0E3XJU | E-cadherin 1 OS=Homo sap      | 30186.4 | 23890.7 | 0.79 | 28629.9 | 0.95 | 19631.3 | 0.65 | 25363   | 0.84 | 24789.7 | 0.82 | 30539   | 1.01 | 31002.3 | 1.03 |
| E7ET40    | Urokinase-type plasminog      | 8753.8  | 10043   | 1.15 | 10868   | 1.24 | 7972    | 0.91 | 9409.9  | 1.07 | 10646.9 | 1.22 | 10681.4 | 1.22 | 9738.5  | 1.11 |
| A8K6V6    | N-acetylglucosamine-6-sulf    | 14806.6 | 14130.6 | 0.95 | 14474.9 | 0.98 | 9677.9  | 0.65 | 15612.1 | 1.05 | 14594.5 | 0.99 | 14408.2 | 0.97 | 14409.1 | 0.97 |
| V9HW22    | Epididymis luminal protein    | 5169.2  | 6176.3  | 1.19 | 4915.2  | 0.95 | 4402.9  | 0.85 | 5382.5  | 1.04 | 5784.9  | 1.12 | 5413.1  | 1.05 | 5273.7  | 1.02 |
| P28799    | Granulins OS=Homo sapien      | 8962.9  | 13200.6 | 1.47 | 8566.9  | 0.96 | 8117.2  | 0.91 | 10492.5 | 1.17 | 10470.4 | 1.17 | 10819.4 | 1.21 | 9760.5  | 1.09 |
| B0YJC6    | Vitamin K-dependent protei    | 16253.9 | 18393.1 | 1.13 | 16104.7 | 0.99 | 13385.9 | 0.82 | 18155.4 | 1.12 | 15686.5 | 0.97 | 19476.2 | 1.20 | 15480.4 | 0.95 |
| A2KBC4    | Anti-TN-C scFv (Fragment)     | 4996.3  | 5443.3  | 1.09 | 4535.9  | 0.91 | 4904.6  | 0.98 | 5186.3  | 1.04 | 5280.6  | 1.06 | 5058.7  | 1.01 | 5224.3  | 1.05 |
| P78492    | Inter-alpha-trypsin inhibitor | 820     | 676.4   | 0.82 | 874.5   | 1.07 | 417.2   | 0.51 | 801.5   | 0.98 | 703.3   | 0.86 | 628.9   | 0.77 | 910.5   | 1.11 |
| Q7Z3B1    | Neuronal growth regulator 1   | 5405.1  | 4784.5  | 0.89 | 5127    | 0.95 | 3566.5  | 0.66 | 5021.4  | 0.93 | 5158.7  | 0.95 | 5011.7  | 0.93 | 4610.3  | 0.85 |
| S6BAR0    | IgG L chain OS=Homo sapi      | 1988.2  | 1661.8  | 0.84 | 2367.8  | 1.19 | 1268.6  | 0.64 | 1681.7  | 0.85 | 1674.3  | 0.84 | 3364.4  | 1.69 | 2416    | 1.22 |
| P13645    | Keratin, type I cytoskeletal  | 11461.9 | 11061.6 | 0.97 | 7528.5  | 0.66 | 9154.3  | 0.80 | 7392.4  | 0.64 | 10137.9 | 0.88 | 11772.1 | 1.03 | 10809.6 | 0.94 |
| Q9Y6R7    | IgG Fc-binding protein OS=    | 4182.5  | 4069    | 0.97 | 3160.2  | 0.76 | 2487.8  | 0.59 | 2981.7  | 0.71 | 5357.1  | 1.28 | 2513.9  | 0.60 | 3199    | 0.76 |
| A0A024ZQZ | Prosaposin (Variant Gauche    | 44266.4 | 51916   | 1.17 | 36858   | 0.83 | 28343.4 | 0.64 | 40853.7 | 0.92 | 45275.1 | 1.02 | 43156.2 | 0.97 | 50370.4 | 1.14 |
| P06870    | Kallikrein-1 OS=Homo sapi     | 31904.2 | 29532.8 | 0.93 | 26696.4 | 0.84 | 24544.6 | 0.77 | 30067.2 | 0.94 | 37889.1 | 1.19 | 27163.4 | 0.85 | 19938.5 | 0.62 |
| A0A024R94 | Serpin peptidase inhibitor, c | 6197    | 7926.4  | 1.28 | 9396.9  | 1.52 | 10940.4 | 1.77 | 6630.6  | 1.07 | 6582.5  | 1.06 | 6966.3  | 1.12 | 7629.3  | 1.23 |
| A0A024R2C | C-type lectin domain family   | 10624.9 | 9181.9  | 0.86 | 7965.2  | 0.75 | 7486.8  | 0.70 | 8543.1  | 0.80 | 10248.6 | 0.96 | 8645.4  | 0.81 | 8053.7  | 0.76 |
| B2RBF5    | cDNA, FLJ95483, highly sim    | 9972.7  | 9872.2  | 0.99 | 10090.3 | 1.01 | 7463.7  | 0.75 | 10399.1 | 1.04 | 9454    | 0.95 | 10323.2 | 1.04 | 10729.7 | 1.08 |
| X6R868    | Bile salt-activated lipase OS | 10342.8 | 13296.1 | 1.29 | 8155.6  | 0.79 | 9041.5  | 0.87 | 11132.9 | 1.08 | 10893.4 | 1.05 | 13786.7 | 1.33 | 8731.9  | 0.84 |
| A0A087WW  | Tenascin-X OS=Homo sapi       |         |         |      |         |      |         |      |         |      |         |      |         |      |         |      |
| Q15828    | Cystatin-M OS=Homo sapi       | 7481.9  | 7456    | 1.00 | 14974.4 | 2.00 | 6224.4  | 0.83 | 8778.4  | 1.17 | 8816.8  | 1.18 | 8199.9  | 1.10 | 6846.3  | 0.92 |
| Q5FWF9    | IGL@ protein OS=Homo sa       | 3111.9  | 2832.6  | 0.91 | 5027.3  | 1.62 | 2277.8  | 0.73 | 3809.7  | 1.22 | 3261.9  | 1.05 | 3448.2  | 1.11 | 3768.6  | 1.21 |
| P22792    | Carboxypeptidase N subunit    | 9129.5  | 8418.9  | 0.92 | 7375.9  | 0.81 | 6103.8  | 0.67 | 8306.7  | 0.91 | 10519.2 | 1.15 | 10166.9 | 1.11 | 8366.4  | 0.92 |
| B4DJQ8    | cDNA FLJ55694, highly sim     | 7815.2  | 9491.6  | 1.21 | 7696.2  | 0.98 | 7051.4  | 0.90 | 8465    | 1.08 | 9227.7  | 1.18 | 8902.9  | 1.14 | 7872.9  | 1.01 |
| E7ETN3    | Uncharacterized protein OS    | 56.9    | 47.1    | 0.83 | 42.5    | 0.75 | 34.2    | 0.60 | 44.4    | 0.78 | 44.1    | 0.78 | 47.4    | 0.83 | 62.1    | 1.09 |
| O75594    | Peptidoglycan recognition p   | 10051.6 | 11315.7 | 1.13 | 10968.1 | 1.09 | 8389.1  | 0.83 | 10397.2 | 1.03 | 11176.1 | 1.11 | 10271.8 | 1.02 | 9934.7  | 0.99 |
| P60174    | Triosephosphate isomerase     | 5034.8  | 6322.4  | 1.26 | 4996.5  | 0.99 | 3888.3  | 0.77 | 5335.4  | 1.06 | 6184.5  | 1.23 | 5511.8  | 1.09 | 5547.9  | 1.10 |
| A0A075B6I | Ig lambda-7 chain C region    | 126.3   | 134.1   | 1.06 | 314.6   | 2.49 | 119.4   | 0.95 | 195.9   | 1.55 | 191.2   | 1.51 | 150.6   | 1.19 | 249.4   | 1.97 |
| P24855    | Deoxyribonuclease-1 OS=H      | 19469.6 | 19120.1 | 0.98 | 10550.1 | 0.54 | 14451.1 | 0.74 | 18482.7 | 0.95 | 19902.9 | 1.02 | 20304.1 | 1.04 | 14070.1 | 0.72 |
| A8K2P8    | cDNA FLJ76245, highly sim     | 4611.3  | 4005.2  | 0.87 | 4797.7  | 1.04 | 3005.9  | 0.65 | 4284.3  | 0.93 | 4544.7  | 0.99 | 4309.2  | 0.93 | 4329.2  | 0.94 |
| Q6LAM1    | Heavy chain of factor I (Fra  | 272.9   | 264     | 0.97 | 172.8   | 0.63 | 174.9   | 0.64 | 218.4   | 0.80 | 264.4   | 0.97 | 229.1   | 0.84 | 317     | 1.16 |
| D9IAI1    | Epididymis secretory protei   | 10023.5 | 10704.4 | 1.07 | 8666.2  | 0.86 | 8083.9  | 0.81 | 9207.2  | 0.92 | 11407.9 | 1.14 | 9249.3  | 0.92 | 8762.1  | 0.87 |
| A8K7G6    | cDNA FLJ75763, highly sim     | 24072.4 | 20747.4 | 0.86 | 67081.8 | 2.79 | 15740.4 | 0.65 | 21956.8 | 0.91 | 29098.7 | 1.21 | 25074.5 | 1.04 | 21249.8 | 0.88 |
| A0A024R3E | Apolipoprotein A-I, isoform   | 5583.4  | 14099.8 | 2.53 | 8339.7  | 1.49 | 10752.4 | 1.93 | 7017    | 1.26 | 6795.4  | 1.22 | 13017.8 | 2.33 | 9385.9  | 1.68 |
| A0A0K0K1  | Cystatin OS=Homo sapiens      | 22034.6 | 23609.1 | 1.07 | 20362.2 | 0.92 | 17781   | 0.81 | 20549.9 | 0.93 | 25344.5 | 1.15 | 22440.5 | 1.02 | 20095   | 0.91 |
| P06733    | Alpha-enolase OS=Homo sa      | 7328.1  | 9197.9  | 1.26 | 7512.7  | 1.03 | 6104.5  | 0.83 | 7530.6  | 1.03 | 9779.6  | 1.33 | 8699.9  | 1.19 | 8416.6  | 1.15 |
| A0A024R0Z | Matrix-remodelling associat   | 13392.9 | 14135.6 | 1.06 | 13360.5 | 1.00 | 9861.6  | 0.74 | 13081.8 | 0.98 | 14067.5 | 1.05 | 13527.6 | 1.01 | 14201.3 | 1.06 |
| P19652    | Alpha-1-acid glycoprotein 2   | 32592.2 | 28760.9 | 0.88 | 42980.5 | 1.32 | 28097.3 | 0.86 | 30432.2 | 0.93 | 25362.8 | 0.78 | 22890.2 | 0.70 | 54229.9 | 1.66 |
| Q7Z379    | Putative uncharacterized pr   | 2134.7  | 2416.1  | 1.13 | 1625.7  | 0.76 | 1794.5  | 0.84 | 2023.5  | 0.95 | 1993    | 0.93 | 2266    | 1.06 | 2332.7  | 1.09 |
| B0BCY7    | Glutamyl aminopeptidase (A    | 6108.5  | 6396.6  | 1.05 | 4871    | 0.80 | 4526.1  | 0.74 | 7544.2  | 1.24 | 7169.7  | 1.17 | 6138.2  | 1.00 | 6823.2  | 1.12 |
| A0A125QY  | GCT-A9 light chain variable   | 2485.4  | 2491.2  | 1.00 | 3158.7  | 1.27 | 1686.8  | 0.68 | 3206.8  | 1.29 | 2375.6  | 0.96 | 2437.5  | 0.98 | 3373.3  | 1.36 |
| P02649    | Apolipoprotein E OS=Homo      | 4851    | 6715.5  | 1.38 | 5542.8  | 1.14 | 4969    | 1.02 | 5478    | 1.13 | 6541.8  | 1.35 | 6263.6  | 1.29 | 5132.9  | 1.06 |
| P11117    | Lysosomal acid phosphatase    | 9940.3  | 11102.1 | 1.12 | 8212.2  | 0.83 | 7771.6  | 0.78 | 9738.9  | 0.98 | 9839.5  | 0.99 | 11705   | 1.18 | 8307.8  | 0.84 |
| P06727    | Apolipoprotein A-IV OS=H      | 5285.4  | 8194    | 1.55 | 8534.3  | 1.61 | 6329.7  | 1.20 | 5770.7  | 1.09 | 6111.2  | 1.16 | 7110.2  | 1.35 | 6475    | 1.23 |
| O76076    | WNT1-inducible-signaling p    | 2026.8  | 2354.8  | 1.16 | 2240.5  | 1.11 | 1497.1  | 0.74 | 2188.9  | 1.08 | 2228.2  | 1.10 | 1983    | 0.98 | 1876.3  | 0.93 |
| Q14508    | WAP four-disulfide core do    | 13168.2 | 12289.6 | 0.93 | 10492.9 | 0.80 | 8609.3  | 0.65 | 12185.4 | 0.93 | 13100.8 | 0.99 | 13006.5 | 0.99 | 15482.9 | 1.18 |
| P04083    | Annexin A1 OS=Homo sapi       | 3672    | 3502.7  | 0.95 | 3667.8  | 1.00 | 2825.3  | 0.77 | 5595.3  | 1.52 | 4147.6  | 1.13 | 4064.7  | 1.11 | 5350.8  | 1.46 |
| Q9UNN8    | Endothelial protein C recept  | 21715.2 | 19919.3 | 0.92 | 17402.5 | 0.80 | 15700   | 0.72 | 21225.8 | 0.98 | 18474.6 | 0.85 | 20438.6 | 0.94 | 21937.6 | 1.01 |
| P18065    | Insulin-like growth factor-bi | 5620.8  | 6669.4  | 1.19 | 6714.4  | 1.19 | 5207    | 0.93 | 5987.2  | 1.07 | 6522.1  | 1.16 | 7067.8  | 1.26 | 6039.7  | 1.07 |
| P14543    | Nidogen-1 OS=Homo sapi        | 6487.1  | 6662.7  | 1.03 | 6247.1  | 0.96 | 6194.6  | 0.95 | 6379.3  | 0.98 | 6386.4  | 0.98 | 6458    | 1.00 | 6279.2  | 0.97 |
| Q7Z5L0    | Vitelline membrane outer la   | 14878.8 | 14838   | 1.00 | 11073.3 | 0.74 | 10759.1 | 0.72 | 11735   | 0.79 | 12882.7 | 0.87 | 15612.3 | 1.05 | 14948.9 | 1.00 |
| B4DM05    | cDNA FLJ51241, highly sim     | 3873.7  | 3373.5  | 0.87 | 3211.1  | 0.83 | 1987.1  | 0.51 | 3039.5  | 0.78 | 3779.5  | 0.98 | 3380.4  | 0.87 | 2472.9  | 0.64 |
| P02671    | Fibrinogen alpha chain OS=    | 4234.1  | 4743    | 1.12 | 3637.4  | 0.86 | 2688.6  | 0.63 | 4047.4  | 0.96 | 4198.3  | 0.99 | 4620.4  | 1.09 | 5013.4  | 1.18 |

|           |                               |         |         |      |         |      |         |      |         |      |         |      |         |      |         |      |
|-----------|-------------------------------|---------|---------|------|---------|------|---------|------|---------|------|---------|------|---------|------|---------|------|
| A0A024R5C | Arylsulfatase A, isoform CR   | 4624.8  | 5705.9  | 1.23 | 4819.6  | 1.04 | 3916.7  | 0.85 | 5213.7  | 1.13 | 4961.3  | 1.07 | 5588.7  | 1.21 | 4636.9  | 1.00 |
| B4DNW0    | cDNA FLJ60317, highly sin     | 4646.2  | 6735    | 1.45 | 4362.2  | 0.94 | 4447.6  | 0.96 | 4353.5  | 0.94 | 5904.8  | 1.27 | 6104.6  | 1.31 | 4342.9  | 0.93 |
| P16870    | Carboxypeptidase E OS=Hc      | 6000.8  | 6963.6  | 1.16 | 8192.7  | 1.37 | 6190.8  | 1.03 | 6365.7  | 1.06 | 7394.1  | 1.23 | 5195.9  | 0.87 | 4811.7  | 0.80 |
| P08582    | Melanotransferrin OS=Hom      | 3211.1  | 3034    | 0.94 | 2998.4  | 0.93 | 2663.6  | 0.83 | 3365    | 1.05 | 3292.2  | 1.03 | 2782.2  | 0.87 | 2661    | 0.83 |
| Q99715    | Collagen alpha-1(XII) chain   | 5685.6  | 5615.7  | 0.99 | 4543.5  | 0.80 | 4483    | 0.79 | 5307.4  | 0.93 | 5506.9  | 0.97 | 5496.1  | 0.97 | 5446.3  | 0.96 |
| P08294    | Extracellular superoxide dis  | 7946.4  | 6185.7  | 0.78 | 6487.6  | 0.82 | 5858.6  | 0.74 | 6718.8  | 0.85 | 7256.2  | 0.91 | 7641.9  | 0.96 | 6378.4  | 0.80 |
| Q6EMK4    | Vasorin OS=Homo sapiens       | 11193   | 13637.6 | 1.22 | 11660.9 | 1.04 | 11262.7 | 1.01 | 12179.6 | 1.09 | 13908.9 | 1.24 | 12904.8 | 1.15 | 11381.6 | 1.02 |
| P21333    | Filamin-A OS=Homo sapien      | 3522    | 3358.3  | 0.95 | 3156.8  | 0.90 | 2544.4  | 0.72 | 3219.8  | 0.91 | 3486    | 0.99 | 3310    | 0.94 | 3494.3  | 0.99 |
| A0A0X9UW  | GCT-A5 light chain variable   | 10309.4 | 8308.8  | 0.81 | 11073.3 | 1.07 | 6619.9  | 0.64 | 9396.4  | 0.91 | 8991.8  | 0.87 | 10450.5 | 1.01 | 11201.3 | 1.09 |
| P02750    | Leucine-rich alpha-2-glycop   | 19100   | 12613   | 0.66 | 24606.6 | 1.29 | 10453.9 | 0.55 | 15722.9 | 0.82 | 13511   | 0.71 | 13859.2 | 0.73 | 35646.8 | 1.87 |
| P19440    | Gamma-glutamyltranspeptid     | 5953.7  | 6381.6  | 1.07 | 5268.6  | 0.88 | 4712    | 0.79 | 5852.7  | 0.98 | 6820.6  | 1.15 | 7100.7  | 1.19 | 4533.4  | 0.76 |
| P30530    | Tyrosine-protein kinase rece  | 8678.5  | 8354.3  | 0.96 | 8598.2  | 0.99 | 6514.2  | 0.75 | 8759.5  | 1.01 | 8655.7  | 1.00 | 8945.3  | 1.03 | 8113.3  | 0.93 |
| O00187    | Mannan-binding lectin serin   | 29491.9 | 28174.7 | 0.96 | 31325.3 | 1.06 | 20703.3 | 0.70 | 27106.5 | 0.92 | 28729   | 0.97 | 32659.2 | 1.11 | 37673   | 1.28 |
| Q9NZP8    | Complement C1r subcompo       | 4947.3  | 4612    | 0.93 | 4221.7  | 0.85 | 3471    | 0.70 | 4781.8  | 0.97 | 5028.8  | 1.02 | 4536.8  | 0.92 | 5447.1  | 1.10 |
| Q96FE7    | Phosphoinositide-3-kinase-i   | 60639.2 | 48791.1 | 0.80 | 50194.9 | 0.83 | 33426.8 | 0.55 | 56833.1 | 0.94 | 56993.2 | 0.94 | 54600.6 | 0.90 | 45056   | 0.74 |
| Q4TZM4    | Hemoglobin beta chain (Fra    | 134.5   | 799.4   | 5.94 | 200.7   | 1.49 | 152.1   | 1.13 | 169.2   | 1.26 | 391.1   | 2.91 | 392.4   | 2.92 | 398.7   | 2.96 |
| P16070    | CD44 antigen OS=Homo sa       | 61721.5 | 46121.7 | 0.75 | 44805.3 | 0.73 | 32947.2 | 0.53 | 52623.7 | 0.85 | 52530   | 0.85 | 56809.7 | 0.92 | 50556.8 | 0.82 |
| Q96PD5    | N-acetylmuramoyl-L-alanin     | 4574.7  | 6845.7  | 1.50 | 4899.5  | 1.07 | 4304.9  | 0.94 | 6124.7  | 1.34 | 4679    | 1.02 | 4731.7  | 1.03 | 5866.3  | 1.28 |
| Q59EQ1    | Cadherin 11, type 2 isoform   | 6154.1  | 5392.5  | 0.88 | 6145.5  | 1.00 | 4164.8  | 0.68 | 5892.6  | 0.96 | 5570.7  | 0.91 | 5926.4  | 0.96 | 6746.7  | 1.10 |
| Q59EJ3    | Heat shock 70kDa protein 1    | 1260.2  | 1688.7  | 1.34 | 1313.5  | 1.04 | 1123    | 0.89 | 1448.6  | 1.15 | 1430.5  | 1.14 | 1427.3  | 1.13 | 1312.5  | 1.04 |
| B4DPF0    | cDNA FLJ54604, highly sin     |         |         |      |         |      |         |      |         |      |         |      |         |      |         |      |
| H7BY55    | Complement decay-accelera     | 23131.9 | 16870.9 | 0.73 | 18960.2 | 0.82 | 11991   | 0.52 | 17699.9 | 0.77 | 18951.4 | 0.82 | 18436.9 | 0.80 | 20402.1 | 0.88 |
| A0A024R5F | Folate receptor 1 (Adult), is | 13354.9 | 11850.3 | 0.89 | 12237.3 | 0.92 | 8645.7  | 0.65 | 12932.5 | 0.97 | 13761.3 | 1.03 | 12888.9 | 0.97 | 10740.6 | 0.80 |
| Q96RW7    | Hemicentin-1 OS=Homo sa       | 4413.3  | 4630.5  | 1.05 | 4397.2  | 1.00 | 3690.3  | 0.84 | 4410.4  | 1.00 | 4345.8  | 0.98 | 4438.6  | 1.01 | 3645.6  | 0.83 |
| Q4LE33    | TNC variant protein (Fragm    | 5727.9  | 5995.7  | 1.05 | 4917.8  | 0.86 | 4043.6  | 0.71 | 5283.6  | 0.92 | 5542.5  | 0.97 | 5062    | 0.88 | 5917.9  | 1.03 |
| P00558    | Phosphoglycerate kinase 1 C   | 2517    | 3378.6  | 1.34 | 2678.5  | 1.06 | 2414.9  | 0.96 | 2926.4  | 1.16 | 3242.2  | 1.29 | 3386    | 1.35 | 2793.2  | 1.11 |
| P05543    | Thyroxine-binding globulin    | 10225   | 8329.4  | 0.81 | 6472.1  | 0.63 | 7373.6  | 0.72 | 8439.7  | 0.83 | 11253.1 | 1.10 | 10374.4 | 1.01 | 12476.3 | 1.22 |
| D3DQU2    | Tripeptidyl peptidase I, isof | 3143.2  | 4449.1  | 1.42 | 3953.4  | 1.26 | 3176.4  | 1.01 | 3856.9  | 1.23 | 3914.5  | 1.25 | 5232.1  | 1.66 | 3194.9  | 1.02 |
| Q59EP1    | Annexin (Fragment) OS=Hc      | 4902.7  | 5871.8  | 1.20 | 5467.6  | 1.12 | 4177.8  | 0.85 | 5309.7  | 1.08 | 6345.5  | 1.29 | 5208    | 1.06 | 5078.5  | 1.04 |
| P33908    | Mannosyl-oligosaccharide 1    | 4125.6  | 4720.8  | 1.14 | 4095.7  | 0.99 | 3316.8  | 0.80 | 4006.9  | 0.97 | 4866.9  | 1.18 | 4740.6  | 1.15 | 3971.6  | 0.96 |
| B7ZW00    | COL6A3 protein OS=Homo        | 862.7   | 764     | 0.89 | 902.1   | 1.05 | 576.2   | 0.67 | 961.7   | 1.11 | 1286.6  | 1.49 | 832.8   | 0.97 | 1001.7  | 1.16 |
| P60022    | Beta-defensin 1 OS=Homo       | 5562.9  | 5318.3  | 0.96 | 7551.5  | 1.36 | 5017.4  | 0.90 | 6151.3  | 1.11 | 4069.6  | 0.73 | 8211.8  | 1.48 | 7714.7  | 1.39 |
| Q9UL78    | Myosin-reactive immunoglo     | 5804.5  | 5435.1  | 0.94 | 5646.1  | 0.97 | 4489.4  | 0.77 | 5065.1  | 0.87 | 5431.4  | 0.94 | 6108.6  | 1.05 | 5699.8  | 0.98 |
| S6BGE0    | IgG H chain OS=Homo sapi      | 665     | 619.1   | 0.93 | 614.4   | 0.92 | 644.3   | 0.97 | 620.3   | 0.93 | 634.2   | 0.95 | 631.1   | 0.95 | 726.6   | 1.09 |
| Q9HCU0    | Endosialin OS=Homo sapie      | 13413   | 12401.7 | 0.92 | 10911.9 | 0.81 | 9069.8  | 0.68 | 13278.6 | 0.99 | 13421.9 | 1.00 | 12460.9 | 0.93 | 10600.7 | 0.79 |
| A0A1K0GX  | Globin C1 OS=Homo sapie       | 6799.3  | 29618.2 | 4.36 | 9508.2  | 1.40 | 7413.2  | 1.09 | 8253.1  | 1.21 | 15153   | 2.23 | 13904.8 | 2.05 | 15770.1 | 2.32 |
| P43121    | Cell surface glycoprotein M   | 3485.7  | 3270    | 0.94 | 3254.3  | 0.93 | 2493.3  | 0.72 | 3249.6  | 0.93 | 3281.8  | 0.94 | 3803.3  | 1.09 | 3274.2  | 0.94 |
| A0A075B6I | Ig alpha-2 chain C region (F  | 590.3   | 692.8   | 1.17 | 593.2   | 1.00 | 599.1   | 1.01 | 790.1   | 1.34 | 732.1   | 1.24 | 521.6   | 0.88 | 551.7   | 0.93 |
| Q96NY8    | Nectin-4 OS=Homo sapiens      | 4612.5  | 4708.4  | 1.02 | 3999.8  | 0.87 | 3850    | 0.83 | 4385.7  | 0.95 | 4907.4  | 1.06 | 5536.9  | 1.20 | 4613.6  | 1.00 |
| A0A024RDJ | SPARC-like 1 (Mast9, hevii    | 3687.9  | 3793.8  | 1.03 | 4046.1  | 1.10 | 3261.7  | 0.88 | 3774.7  | 1.02 | 4534    | 1.23 | 3652.7  | 0.99 | 3736.7  | 1.01 |
| G3V4U0    | Fibulin-5 OS=Homo sapien      | 4667.9  | 5074.9  | 1.09 | 4457.3  | 0.95 | 3773.5  | 0.81 | 4585.5  | 0.98 | 5020.6  | 1.08 | 4681    | 1.00 | 4490.6  | 0.96 |
| A0A0A1TT  | Lutheran blood group glyco    | 3736.7  | 4202.2  | 1.12 | 3335.2  | 0.89 | 3038.3  | 0.81 | 3613.9  | 0.97 | 3773.6  | 1.01 | 3867.2  | 1.03 | 3478    | 0.93 |
| X6R8A1    | Carboxypeptidase OS=Hom       | 5613.9  | 9108.3  | 1.62 | 4903.2  | 0.87 | 5425.3  | 0.97 | 7045.1  | 1.25 | 7273.7  | 1.30 | 8585.6  | 1.53 | 6819.7  | 1.21 |
| P19320    | Vascular cell adhesion prote  | 4993.5  | 4789.2  | 0.96 | 7333.7  | 1.47 | 4646.3  | 0.93 | 4838.7  | 0.97 | 4779.5  | 0.96 | 4553.1  | 0.91 | 5918.9  | 1.19 |
| A0A024ROZ | Macrophage colony-stimula     | 7324.9  | 6218.2  | 0.85 | 6126.4  | 0.84 | 4574    | 0.62 | 6227    | 0.85 | 6485.1  | 0.89 | 6718.1  | 0.92 | 7291.7  | 1.00 |
| P12111    | Collagen alpha-3(VI) chain    | 7162.4  | 7415.6  | 1.04 | 7912.6  | 1.10 | 5452.6  | 0.76 | 7785.7  | 1.09 | 8009.2  | 1.12 | 7299.1  | 1.02 | 7169.4  | 1.00 |
| Q6UX06    | Olfactomedin-4 OS=Homo        | 6418.7  | 5003.2  | 0.78 | 4025.9  | 0.63 | 3660.8  | 0.57 | 4811.1  | 0.75 | 9592.3  | 1.49 | 4072.6  | 0.63 | 4205.4  | 0.66 |
| A8K2T4    | cDNA FLJ78207, highly sin     | 7732.9  | 7452.5  | 0.96 | 7214.7  | 0.93 | 5493.9  | 0.71 | 7679.1  | 0.99 | 7694    | 0.99 | 8065.7  | 1.04 | 7781.9  | 1.01 |
| A0A024RC  | Cadherin 2, type 1, N-cadhe   | 4857.4  | 4051.2  | 0.83 | 3790    | 0.78 | 2964.5  | 0.61 | 4320.6  | 0.89 | 4196.5  | 0.86 | 4337.4  | 0.89 | 4671    | 0.96 |
| P51884    | Lumican OS=Homo sapiens       | 7967.7  | 7642.1  | 0.96 | 10154.5 | 1.27 | 6257    | 0.79 | 8331.2  | 1.05 | 9397.3  | 1.18 | 8790.4  | 1.10 | 8770.9  | 1.10 |
| Q9BYE9    | Cadherin-related family mer   | 3705.1  | 3781.4  | 1.02 | 3640    | 0.98 | 3191.5  | 0.86 | 3753.9  | 1.01 | 3913.1  | 1.06 | 3706.3  | 1.00 | 3380.4  | 0.91 |
| Q9UKU9    | Angiopietin-related protein   | 6197.8  | 7634.6  | 1.23 | 4390.3  | 0.71 | 6199.6  | 1.00 | 7477.6  | 1.21 | 6215.8  | 1.00 | 10462.1 | 1.69 | 5680    | 0.92 |
| P04406    | Glyceraldehyde-3-phosphat     | 4050.2  | 4985.1  | 1.23 | 4364.4  | 1.08 | 3597.4  | 0.89 | 4289.4  | 1.06 | 5148.7  | 1.27 | 5397.6  | 1.33 | 4728.8  | 1.17 |
| A4D2D2    | Procollagen C-endopeptidas    | 2776.7  | 2648.9  | 0.95 | 2896.3  | 1.04 | 2079.8  | 0.75 | 2789.7  | 1.00 | 2935    | 1.06 | 2604.4  | 0.94 | 2635.7  | 0.95 |
| Q9BXP8    | Pappalysin-2 OS=Homo sap      | 2528.1  | 3162.2  | 1.25 | 2628.6  | 1.04 | 2362.7  | 0.93 | 2984.5  | 1.18 | 3081.3  | 1.22 | 3160.9  | 1.25 | 2770.2  | 1.10 |
| P01591    | Immunoglobulin J chain OS     | 22042.9 | 21643   | 0.98 | 17461.8 | 0.79 | 13951.6 | 0.63 | 20737.8 | 0.94 | 23622.7 | 1.07 | 19619.8 | 0.89 | 18930   | 0.86 |
| A0A024R37 | Cathepsin B, isoform CRA_     | 9181.8  | 11295   | 1.23 | 8769    | 0.96 | 7231.1  | 0.79 | 13199.4 | 1.44 | 12385.8 | 1.35 | 11797   | 1.28 | 8858.7  | 0.96 |
| B4DVA7    | Beta-hexosaminidase OS=H      | 4755.1  | 5384.5  | 1.13 | 3289.8  | 0.69 | 3831.4  | 0.81 | 4917.7  | 1.03 | 6053.1  | 1.27 | 5639.6  | 1.19 | 4600.1  | 0.97 |



|           |                                |         |         |      |        |      |        |      |         |      |         |      |         |      |         |      |
|-----------|--------------------------------|---------|---------|------|--------|------|--------|------|---------|------|---------|------|---------|------|---------|------|
| Q03403    | Trefoil factor 2 OS=Homo s     | 7971.6  | 8058.9  | 1.01 | 7228.5 | 0.91 | 7331.7 | 0.92 | 7912    | 0.99 | 8480.1  | 1.06 | 10380.9 | 1.30 | 7841.1  | 0.98 |
| A0A140VJC | Testicular tissue protein Li 2 | 6176.6  | 6109.1  | 0.99 | 5411.3 | 0.88 | 4451.7 | 0.72 | 5954.7  | 0.96 | 6067.9  | 0.98 | 5151.7  | 0.83 | 5195    | 0.84 |
| Q969P0    | Immunoglobulin superfamil      | 5559.5  | 5478.2  | 0.99 | 5763.1 | 1.04 | 4520.6 | 0.81 | 5536.4  | 1.00 | 6001.2  | 1.08 | 6068.8  | 1.09 | 5037.5  | 0.91 |
| Q96SA9    | Anti-streptococcal/anti-myo    | 56.4    | 59      | 1.05 | 62.1   | 1.10 | 34.4   | 0.61 | 54.8    | 0.97 | 59.8    | 1.06 | 60.9    | 1.08 | 70      | 1.24 |
| A0N071    | Delta globin OS=Homo sap       |         |         |      |        |      |        |      |         |      |         |      |         |      |         |      |
| A0A024R9E | Plasma glutamate carboxype     | 4634    | 5450.1  | 1.18 | 4178.2 | 0.90 | 3922.2 | 0.85 | 4977.5  | 1.07 | 5938.4  | 1.28 | 6070.9  | 1.31 | 4969.1  | 1.07 |
| P43251    | Biotinidase OS=Homo sapi       | 3739    | 4007.9  | 1.07 | 3433.6 | 0.92 | 3371.9 | 0.90 | 3544.7  | 0.95 | 3927.9  | 1.05 | 3892.8  | 1.04 | 3499.8  | 0.94 |
| D3DPK5    | SH3 domain binding glutam      | 8402.9  | 7301.7  | 0.87 | 9659   | 1.15 | 5353   | 0.64 | 8906.8  | 1.06 | 8228.3  | 0.98 | 9216.4  | 1.10 | 7713.3  | 0.92 |
| Q14767    | Latent-transforming growth     | 2717.6  | 2487.2  | 0.92 | 2812.7 | 1.03 | 1639.6 | 0.60 | 2847.3  | 1.05 | 2505.4  | 0.92 | 2936.5  | 1.08 | 2437.9  | 0.90 |
| Q92956    | Tumor necrosis factor recep    | 2257.6  | 2459.8  | 1.09 | 1976.6 | 0.88 | 1927.6 | 0.85 | 2293.4  | 1.02 | 2205.1  | 0.98 | 1971.1  | 0.87 | 2168    | 0.96 |
| A0A087WW  | Mucin-1 OS=Homo sapiens        | 8057.4  | 7146.2  | 0.89 | 6532   | 0.81 | 5873.5 | 0.73 | 7307.5  | 0.91 | 8981    | 1.11 | 7333.4  | 0.91 | 6572.8  | 0.82 |
| P07195    | L-lactate dehydrogenase B c    | 7645.5  | 10143.2 | 1.33 | 7229.1 | 0.95 | 6568.5 | 0.86 | 8089.9  | 1.06 | 11867.5 | 1.55 | 9207.9  | 1.20 | 7653    | 1.00 |
| A2MYE1    | A30 (Fragment) OS=Homo         | 4963.5  | 4420.3  | 0.89 | 5418.3 | 1.09 | 5346.5 | 1.08 | 4195.9  | 0.85 | 4712.5  | 0.95 | 4510.6  | 0.91 | 5181.3  | 1.04 |
| Q4W4Y1    | Dopamine receptor interacti    | 2352.5  | 2555.9  | 1.09 | 2251.8 | 0.96 | 2095.3 | 0.89 | 2399    | 1.02 | 2771.2  | 1.18 | 2422.2  | 1.03 | 1895.2  | 0.81 |
| D3DSQ1    | N-acylsphingosine amidohy      | 4530.2  | 5411    | 1.19 | 4681.5 | 1.03 | 3678.5 | 0.81 | 5312.2  | 1.17 | 5482.3  | 1.21 | 4348    | 0.96 | 4323.6  | 0.95 |
| A1A4E9    | Keratin 13 OS=Homo sapie       | 3225.2  | 6278.1  | 1.95 | 2943.1 | 0.91 | 3674.5 | 1.14 | 2963.2  | 0.92 | 3484.1  | 1.08 | 5475.3  | 1.70 | 6283.7  | 1.95 |
| P07996    | Thrombospondin-1 OS=Hoi        | 862.4   | 829.5   | 0.96 | 950.9  | 1.10 | 603    | 0.70 | 949.9   | 1.10 | 973.4   | 1.13 | 1055    | 1.22 | 955.2   | 1.11 |
| Q07507    | Dermatopontin OS=Homo s        | 7932.2  | 7663.8  | 0.97 | 8305.1 | 1.05 | 5661.8 | 0.71 | 7674.5  | 0.97 | 8157    | 1.03 | 8296    | 1.05 | 6186.1  | 0.78 |
| O43278    | Kunitz-type protease inhibit   | 2534.5  | 2618.5  | 1.03 | 2388.3 | 0.94 | 1943.2 | 0.77 | 2441.5  | 0.96 | 2672.2  | 1.05 | 2229.9  | 0.88 | 2272.6  | 0.90 |
| B2RCM5    | cDNA, FLJ96160, highly si      | 2574.2  | 2778.8  | 1.08 | 2565.7 | 1.00 | 2057.3 | 0.80 | 2724.9  | 1.06 | 2740.7  | 1.06 | 2594.7  | 1.01 | 2391.2  | 0.93 |
| B2R815    | cDNA, FLJ93695, highly si      | 3411.3  | 3952.5  | 1.16 | 3292.2 | 0.97 | 2683.9 | 0.79 | 3455.1  | 1.01 | 3860.7  | 1.13 | 4139.3  | 1.21 | 3346.8  | 0.98 |
| Q9UL83    | Myosin-reactive immunoglo      | 1795.6  | 1858.1  | 1.03 | 1701.5 | 0.95 | 1872.9 | 1.04 | 1877.1  | 1.05 | 1697.8  | 0.95 | 1765.9  | 0.98 | 1933.1  | 1.08 |
| B2R9F2    | cDNA, FLJ94361, highly si      | 6301.6  | 6586.5  | 1.05 | 6752   | 1.07 | 6012.8 | 0.95 | 6470.5  | 1.03 | 6705.7  | 1.06 | 6742.9  | 1.07 | 7251.2  | 1.15 |
| Q65ZC9    | Single-chain Fv (Fragment)     | 3455.5  | 3911.8  | 1.13 | 3290.7 | 0.95 | 3307.4 | 0.96 | 3863.8  | 1.12 | 3751.6  | 1.09 | 3579.6  | 1.04 | 3859.5  | 1.12 |
| B2R6J2    | cDNA, FLJ92973, highly si      | 4708.4  | 4918.4  | 1.04 | 4153.1 | 0.88 | 3316.6 | 0.70 | 4704.9  | 1.00 | 5856.9  | 1.24 | 5435.1  | 1.15 | 4215.5  | 0.90 |
| Q6UVK1    | Chondroitin sulfate proteogl   | 4052.6  | 4253.8  | 1.05 | 3586.2 | 0.88 | 3342.5 | 0.82 | 3778.9  | 0.93 | 4146.7  | 1.02 | 4047.6  | 1.00 | 3405.6  | 0.84 |
| A0A024R9C | Thrombospondin 1, isoform      | 2992.3  | 2782.9  | 0.93 | 2760.4 | 0.92 | 1885.2 | 0.63 | 2612.4  | 0.87 | 2562.7  | 0.86 | 2686    | 0.90 | 2439.8  | 0.82 |
| P06312    | Immunoglobulin kappa varic     | 765.8   | 695.6   | 0.91 | 596.1  | 0.78 | 541.4  | 0.71 | 617.4   | 0.81 | 633.4   | 0.83 | 772.7   | 1.01 | 811.4   | 1.06 |
| Q6UXG3    | CMRF35-like molecule 9 O       | 12761.2 | 10138.3 | 0.79 | 8746.7 | 0.69 | 7962.6 | 0.62 | 9517.2  | 0.75 | 10915.3 | 0.86 | 10986.5 | 0.86 | 9753.3  | 0.76 |
| Q9UL81    | Myosin-reactive immunoglo      | 23.2    | 34.3    | 1.48 | 62.8   | 2.71 | 26.6   | 1.15 | 38.9    | 1.68 | 30.3    | 1.31 | 38      | 1.64 | 34.1    | 1.47 |
| D3DVW9    | Protein tyrosine phosphatase   | 3750.6  | 3944.4  | 1.05 | 3701.6 | 0.99 | 3299.8 | 0.88 | 3873.7  | 1.03 | 4607.8  | 1.23 | 4428.1  | 1.18 | 4253.1  | 1.13 |
| V9HWB8    | Pyruvate kinase OS=Homo        | 3511.6  | 4612.1  | 1.31 | 3926.1 | 1.12 | 3562.7 | 1.01 | 4358.7  | 1.24 | 4392.5  | 1.25 | 4571    | 1.30 | 5137.3  | 1.46 |
| B2R4M6    | Protein S100 OS=Homo sap       | 4812.2  | 6589.9  | 1.37 | 5338.6 | 1.11 | 3495.5 | 0.73 | 6009.2  | 1.25 | 6572.4  | 1.37 | 6127.6  | 1.27 | 9257.9  | 1.92 |
| A0A024R2V | Dystroglycan 1 (Dystrophin     | 2219.6  | 2598.5  | 1.17 | 2103.5 | 0.95 | 1831.5 | 0.83 | 2110.9  | 0.95 | 2400.7  | 1.08 | 2450.8  | 1.10 | 1990    | 0.90 |
| G3V3Y2    | Fibulin-5 (Fragment) OS=H      | 255.6   | 188.9   | 0.74 | 217.1  | 0.85 | 121.8  | 0.48 | 192.6   | 0.75 | 184.4   | 0.72 | 179     | 0.70 | 237.3   | 0.93 |
| Q9UL70    | Myosin-reactive immunoglo      | 84.6    | 101     | 1.19 | 108.3  | 1.28 | 81.7   | 0.97 | 91.1    | 1.08 | 95      | 1.12 | 97.9    | 1.16 | 89.3    | 1.06 |
| O00533    | Neural cell adhesion molecu    | 1884.3  | 1722.1  | 0.91 | 1576.4 | 0.84 | 1445.9 | 0.77 | 1956.5  | 1.04 | 1877.3  | 1.00 | 1718.9  | 0.91 | 1643.1  | 0.87 |
| X6R8F3    | Neutrophil gelatinase-associ   | 6613.9  | 6977.9  | 1.06 | 5396.3 | 0.82 | 3983.1 | 0.60 | 5926.6  | 0.90 | 10723.4 | 1.62 | 5612.7  | 0.85 | 7023.2  | 1.06 |
| A0A0K0K1  | 6-phosphogluconolactonase      | 3608.4  | 4299.8  | 1.19 | 4210.3 | 1.17 | 3104.4 | 0.86 | 4061.4  | 1.13 | 4581.4  | 1.27 | 4552.2  | 1.26 | 4135    | 1.15 |
| A2NB45    | Cold agglutinin FS-1 L-chai    | 1753.5  | 1719.5  | 0.98 | 2595.5 | 1.48 | 1320.5 | 0.75 | 1746.8  | 1.00 | 1749.3  | 1.00 | 1796.2  | 1.02 | 1897.8  | 1.08 |
| E9PNQ8    | Thy-1 membrane glycoprote      | 2848.4  | 2619    | 0.92 | 3111.1 | 1.09 | 2023.6 | 0.71 | 2671.5  | 0.94 | 2798.9  | 0.98 | 2710.3  | 0.95 | 2412.1  | 0.85 |
| P09668    | Pro-cathepsin H OS=Homo        | 3752.6  | 3818.3  | 1.02 | 3708.1 | 0.99 | 3114.7 | 0.83 | 4093.6  | 1.09 | 4162.3  | 1.11 | 4117.3  | 1.10 | 3927.9  | 1.05 |
| A0A109PW  | MS-C1 light chain variable     | 534.8   | 632.9   | 1.18 | 643.8  | 1.20 | 402.3  | 0.75 | 598.6   | 1.12 | 540.1   | 1.01 | 486.2   | 0.91 | 572.3   | 1.07 |
| Q06830    | Peroxisome oxidoreductin-1     | 4003    | 5109.6  | 1.28 | 3996.1 | 1.00 | 3116.1 | 0.78 | 3967    | 0.99 | 5034.6  | 1.26 | 4278.5  | 1.07 | 3861.5  | 0.96 |
| A0A140VJV | Sushi domain containing 2,     | 2019.6  | 2316.1  | 1.15 | 1852.6 | 0.92 | 1772.3 | 0.88 | 1980    | 0.98 | 2065.6  | 1.02 | 2159.8  | 1.07 | 1559.9  | 0.77 |
| Q6UXB8    | Peptidase inhibitor 16 OS=I    | 5069.6  | 4194.7  | 0.83 | 6895.6 | 1.36 | 3273.1 | 0.65 | 4707.7  | 0.93 | 3892.8  | 0.77 | 4161.6  | 0.82 | 5028.4  | 0.99 |
| P26038    | Moosin OS=Homo sapiens         | 1515.3  | 1900.3  | 1.25 | 1419.9 | 0.94 | 1609.4 | 1.06 | 1648.8  | 1.09 | 1863.5  | 1.23 | 1982.3  | 1.31 | 1550.3  | 1.02 |
| B4DUV1    | Fibulin-1 OS=Homo sapiens      | 4051.8  | 3808.6  | 0.94 | 4108.4 | 1.01 | 3064.4 | 0.76 | 4002.7  | 0.99 | 3563    | 0.88 | 3644    | 0.90 | 3855.4  | 0.95 |
| P14384    | Carboxypeptidase M OS=H        | 7514.5  | 7591.3  | 1.01 | 6086.5 | 0.81 | 5482.5 | 0.73 | 7051.3  | 0.94 | 7146.8  | 0.95 | 6982.5  | 0.93 | 6406.9  | 0.85 |
| A0A0X9TD  | MS-D1 light chain variable     | 6873.1  | 6922.7  | 1.01 | 8683.4 | 1.26 | 6141.7 | 0.89 | 7193.8  | 1.05 | 6887.4  | 1.00 | 8061    | 1.17 | 7558.7  | 1.10 |
| A0A024R9J | Nephroblastoma overexpres      | 3228.5  | 3194.3  | 0.99 | 3252.1 | 1.01 | 2459.5 | 0.76 | 3488.8  | 1.08 | 3041.5  | 0.94 | 2950.5  | 0.91 | 2732.1  | 0.85 |
| P35908    | Keratin, type II cytoskeletal  | 884.5   | 823.2   | 0.93 | 575.3  | 0.65 | 800.4  | 0.90 | 610.1   | 0.69 | 771.6   | 0.87 | 850.1   | 0.96 | 708.4   | 0.80 |
| V9HWB4    | Epididymis secretory sperm     | 1025.7  | 1085.3  | 1.06 | 908.9  | 0.89 | 882.4  | 0.86 | 970.4   | 0.95 | 1146.5  | 1.12 | 1092    | 1.06 | 995.2   | 0.97 |
| P43652    | Afamin OS=Homo sapiens         | 5833.9  | 6555.5  | 1.12 | 5167.9 | 0.89 | 9319.1 | 1.60 | 6123.9  | 1.05 | 5821.8  | 1.00 | 6216.2  | 1.07 | 6424.9  | 1.10 |
| A2NI60    | BRE (Fragment) OS=Homo         |         |         |      |        |      |        |      |         |      |         |      |         |      |         |      |
| A0A024R1C | Contactin 1, isoform CRA_      | 2524.1  | 2593.6  | 1.03 | 2385   | 0.94 | 2125   | 0.84 | 2493.1  | 0.99 | 2662.2  | 1.05 | 2498.9  | 0.99 | 2137.7  | 0.85 |
| Q9Y5Y7    | Lymphatic vessel endothelia    | 22274.4 | 13497.1 | 0.61 | 21240  | 0.95 | 9204.5 | 0.41 | 20244.2 | 0.91 | 18007.5 | 0.81 | 18504.4 | 0.83 | 26382.3 | 1.18 |
| A0A024R5Z | Annexin OS=Homo sapiens        | 2178.1  | 2133.6  | 0.98 | 2179.2 | 1.00 | 2212.7 | 1.02 | 2570.7  | 1.18 | 2318.8  | 1.06 | 2357.3  | 1.08 | 2382.2  | 1.09 |

|           |                                 |         |         |      |         |      |         |      |         |      |         |      |         |      |         |      |
|-----------|---------------------------------|---------|---------|------|---------|------|---------|------|---------|------|---------|------|---------|------|---------|------|
| Q7Z7M0    | Multiple epidermal growth f     | 2118.1  | 2286.2  | 1.08 | 2037.4  | 0.96 | 1769.5  | 0.84 | 2318.4  | 1.09 | 2546.4  | 1.20 | 2450.9  | 1.16 | 1908.6  | 0.90 |
| A0A0X9UW  | MS-B1 light chain variable 1    | 11.2    | 22      | 1.96 | 19.9    | 1.78 | 16.8    | 1.50 | 14.9    | 1.33 | 11.5    | 1.03 | 13.4    | 1.20 | 14.5    | 1.29 |
| Q92520    | Protein FAM3C OS=Homo           | 3355.8  | 3680.4  | 1.10 | 4972.7  | 1.48 | 3158.2  | 0.94 | 3505.7  | 1.04 | 4087.7  | 1.22 | 3307.6  | 0.99 | 3179.6  | 0.95 |
| P17936    | Insulin-like growth factor-bi   | 3871    | 3835.1  | 0.99 | 3423.4  | 0.88 | 2883.5  | 0.74 | 3101.8  | 0.80 | 4083.1  | 1.05 | 4204.2  | 1.09 | 3949.8  | 1.02 |
| S6C4Q9    | IgG L chain OS=Homo sapi        | 532.7   | 521.1   | 0.98 | 715.4   | 1.34 | 471.4   | 0.88 | 665.7   | 1.25 | 602.4   | 1.13 | 568.8   | 1.07 | 596.1   | 1.12 |
| Q13228    | Selenium-binding protein 1      | 3078.1  | 3077.2  | 1.00 | 2877.9  | 0.93 | 2469.5  | 0.80 | 3024    | 0.98 | 3094.8  | 1.01 | 3213    | 1.04 | 2905.3  | 0.94 |
| Q9UL90    | Myosin-reactive immunoglo       | 667.8   | 744.5   | 1.11 | 577.6   | 0.86 | 711.5   | 1.07 | 632.5   | 0.95 | 880.3   | 1.32 | 652.9   | 0.98 | 689.8   | 1.03 |
| B2RE74    | cDNA, FLJ94876, highly sii      | 1428.4  | 2126.8  | 1.49 | 1580.9  | 1.11 | 1895.1  | 1.33 | 1611.2  | 1.13 | 1945.1  | 1.36 | 1668.7  | 1.17 | 1386.4  | 0.97 |
| Q9H804    | cDNA FLJ14022 fis, clone        | 216.2   | 307.3   | 1.42 | 230.2   | 1.06 | 287.6   | 1.33 | 290.7   | 1.34 | 183.2   | 0.85 | 317.8   | 1.47 | 358.9   | 1.66 |
| V9HW53    | Dimethylarginine dimethyla      | 2336.9  | 2501.4  | 1.07 | 2391.8  | 1.02 | 1909.8  | 0.82 | 2285.5  | 0.98 | 2782.2  | 1.19 | 2671.6  | 1.14 | 2377.4  | 1.02 |
| Q9UHL4    | Dipeptidyl peptidase 2 OS=      | 2357.4  | 2840.9  | 1.21 | 2170.5  | 0.92 | 2404.5  | 1.02 | 2754.5  | 1.17 | 2972.2  | 1.26 | 3067    | 1.30 | 2389.2  | 1.01 |
| O00241    | Signal-regulatory protein be    | 3846.2  | 3648.6  | 0.95 | 3977    | 1.03 | 2785.2  | 0.72 | 3271.7  | 0.85 | 3353.4  | 0.87 | 3901    | 1.01 | 3816.9  | 0.99 |
| Q9HAT2    | Sialate O-acetyltransferase OS= | 5170.6  | 5690.4  | 1.10 | 5070.3  | 0.98 | 3857.9  | 0.75 | 5266.1  | 1.02 | 6201.3  | 1.20 | 5169.4  | 1.00 | 5246.1  | 1.01 |
| B7Z9B8    | cDNA FLJ56912, highly sin       | 5298.8  | 5761.1  | 1.09 | 6171.9  | 1.16 | 3949.3  | 0.75 | 5993.9  | 1.13 | 5556.2  | 1.05 | 5967.5  | 1.13 | 4806.3  | 0.91 |
| Q96DA0    | Zymogen granule protein 16      | 6621.2  | 5922.7  | 0.89 | 4720.3  | 0.71 | 3676.1  | 0.56 | 5244.9  | 0.79 | 6937.1  | 1.05 | 4787.5  | 0.72 | 4561.2  | 0.69 |
| A8K7Q1    | cDNA FLJ77770, highly sin       | 3019.9  | 3709.7  | 1.23 | 2704.6  | 0.90 | 3207.6  | 1.06 | 2838.6  | 0.94 | 3151.2  | 1.04 | 3331    | 1.10 | 2708.4  | 0.90 |
| V9HWE9    | Epididymis secretory protei     | 2354.8  | 2724.2  | 1.16 | 2283.9  | 0.97 | 1889.5  | 0.80 | 2734.4  | 1.16 | 2881.9  | 1.22 | 2660.9  | 1.13 | 2578.8  | 1.10 |
| P00995    | Serine protease inhibitor Ka    | 4616.6  | 3518.1  | 0.76 | 4646.8  | 1.01 | 3072.8  | 0.67 | 3937.2  | 0.85 | 4284.3  | 0.93 | 4482    | 0.97 | 4145.1  | 0.90 |
| P23142    | Fibulin-1 OS=Homo sapiens       |         |         |      |         |      |         |      |         |      |         |      |         |      |         |      |
| J3KPF3    | 4F2 cell-surface antigen hea    | 1964.2  | 2481.6  | 1.26 | 1848.5  | 0.94 | 1686    | 0.86 | 2022.9  | 1.03 | 2327    | 1.18 | 2371.8  | 1.21 | 1878.3  | 0.96 |
| P01023    | Alpha-2-macroglobulin OS=       | 1389.4  | 2846.8  | 2.05 | 1790.8  | 1.29 | 1615.2  | 1.16 | 2120.8  | 1.53 | 1764.6  | 1.27 | 2447.4  | 1.76 | 1904.3  | 1.37 |
| A0A146E5L | Mesenchymal stromal cell-a      | 3675.7  | 3860.1  | 1.05 | 3901.6  | 1.06 | 2476.7  | 0.67 | 4008.5  | 1.09 | 4118.3  | 1.12 | 4203.8  | 1.14 | 3991.6  | 1.09 |
| Q6LES2    | Annexin (Fragment) OS=Hc        | 1926.9  | 2260.1  | 1.17 | 1675.5  | 0.87 | 1802.2  | 0.94 | 2131.6  | 1.11 | 2170.9  | 1.13 | 2216.3  | 1.15 | 1804.7  | 0.94 |
| V9HW12    | Epididymis secretory sperm      | 2198.6  | 2931.3  | 1.33 | 2180.4  | 0.99 | 1703.8  | 0.77 | 2218.3  | 1.01 | 2695.6  | 1.23 | 2416.8  | 1.10 | 2170.5  | 0.99 |
| A0A087WV  | Neural cell adhesion molecu     | 7327.9  | 6867.7  | 0.94 | 6201    | 0.85 | 4723.8  | 0.64 | 6512.9  | 0.89 | 7057.6  | 0.96 | 7053.3  | 0.96 | 6276.5  | 0.86 |
| P05109    | Protein S100-A8 OS=Homo         | 7687.1  | 11368.9 | 1.48 | 8367.2  | 1.09 | 5845.8  | 0.76 | 10957.3 | 1.43 | 11092.3 | 1.44 | 8418.2  | 1.10 | 16271.7 | 2.12 |
| A0A0S2Z42 | HCG2039812, isoform CR          | 2019.2  | 2751.2  | 1.36 | 1418.1  | 0.70 | 1540.3  | 0.76 | 1412.6  | 0.70 | 1874.5  | 0.93 | 2630.1  | 1.30 | 3741.2  | 1.85 |
| A0A0G2JLV | Leukocyte-associated immu       | 10954.7 | 9309.4  | 0.85 | 8803.8  | 0.80 | 7112.7  | 0.65 | 10296   | 0.94 | 10161.5 | 0.93 | 10274.9 | 0.94 | 9720.2  | 0.89 |
| M9MML0    | Fc of IgG low affinity IIIa re  | 2128.2  | 2065.5  | 0.97 | 1762.7  | 0.83 | 1408.9  | 0.66 | 2087.8  | 0.98 | 1902.6  | 0.89 | 2406.7  | 1.13 | 1841.5  | 0.87 |
| P17900    | Ganglioside GM2 activator       | 30307.1 | 26291.2 | 0.87 | 37220.9 | 1.23 | 17844.8 | 0.59 | 33707.9 | 1.11 | 36274.8 | 1.20 | 30110.7 | 0.99 | 45241.4 | 1.49 |
| Q14766    | Latent-transforming growth      | 1726.8  | 1740.2  | 1.01 | 2345.7  | 1.36 | 1354.9  | 0.78 | 1814.4  | 1.05 | 1769.2  | 1.02 | 1682.6  | 0.97 | 1620.1  | 0.94 |
| V9HWC9    | Superoxide dismutase [Cu-z      | 7051.2  | 6624.5  | 0.94 | 7573.1  | 1.07 | 5875.6  | 0.83 | 7308.5  | 1.04 | 7867.9  | 1.12 | 6568.3  | 0.93 | 6099.7  | 0.87 |
| A8K0E7    | cDNA FLJ77464, highly sin       | 1642.1  | 1621.8  | 0.99 | 1477    | 0.90 | 1200    | 0.73 | 1499.5  | 0.91 | 1658.5  | 1.01 | 1702.6  | 1.04 | 1531.7  | 0.93 |
| Q8N114    | Protein shisa-5 OS=Homo s       | 9621.4  | 7917.8  | 0.82 | 7596    | 0.79 | 5190.8  | 0.54 | 8312.4  | 0.86 | 8938    | 0.93 | 8866.3  | 0.92 | 8826.3  | 0.92 |
| A8K5T0    | cDNA FLJ75416, highly sin       | 1759.1  | 2427    | 1.38 | 2126.8  | 1.21 | 1682.7  | 0.96 | 1907.5  | 1.08 | 1816.1  | 1.03 | 2171.7  | 1.23 | 2007.4  | 1.14 |
| P61970    | Nuclear transport factor 2 O    | 4546.1  | 4776.5  | 1.05 | 3725    | 0.82 | 3291.9  | 0.72 | 4216.4  | 0.93 | 5200.8  | 1.14 | 5235.9  | 1.15 | 4608.7  | 1.01 |
| Q53HF3    | Galactosidase, alpha variant    | 1888    | 2257.9  | 1.20 | 1522.3  | 0.81 | 1554.9  | 0.82 | 1689.8  | 0.90 | 2162.2  | 1.15 | 2305    | 1.22 | 1481.8  | 0.78 |
| A8K7E0    | cDNA FLJ76911, highly sin       | 1780.1  | 2175.2  | 1.22 | 1777.9  | 1.00 | 1639.2  | 0.92 | 2115.3  | 1.19 | 2503.3  | 1.41 | 2498    | 1.40 | 1949.8  | 1.10 |
| A0A0X9T7  | MS-D3 heavy chain variable      | 988     | 1066.4  | 1.08 | 825.6   | 0.84 | 970.3   | 0.98 | 970.9   | 0.98 | 1053.7  | 1.07 | 912.5   | 0.92 | 1027.9  | 1.04 |
| P26842    | CD27 antigen OS=Homo sa         | 8475.3  | 7241.3  | 0.85 | 8781.8  | 1.04 | 5361    | 0.63 | 8328    | 0.98 | 7492    | 0.88 | 8459.2  | 1.00 | 8591.4  | 1.01 |
| Q9UHG2    | ProSAAS OS=Homo sapien          | 1948.4  | 2006.3  | 1.03 | 1615.3  | 0.83 | 1372.2  | 0.70 | 1626.7  | 0.83 | 1858.4  | 0.95 | 1994.7  | 1.02 | 1628.7  | 0.84 |
| P39059    | Collagen alpha-1(XV) chain      | 5038.6  | 5465.6  | 1.08 | 4044.1  | 0.80 | 4524.8  | 0.90 | 5523.7  | 1.10 | 5827.2  | 1.16 | 5977.5  | 1.19 | 4145.9  | 0.82 |
| D3DX01    | Amine oxidase OS=Homo s         | 2004.7  | 2049.2  | 1.02 | 2070.4  | 1.03 | 1802    | 0.90 | 1655.5  | 0.83 | 2233.3  | 1.11 | 1984.6  | 0.99 | 1995.2  | 1.00 |
| S6BGF5    | IgG H chain OS=Homo sapi        | 1031.6  | 1192.1  | 1.16 | 845     | 0.82 | 1179.8  | 1.14 | 1052    | 1.02 | 1038.8  | 1.01 | 1036.4  | 1.00 | 1099.6  | 1.07 |
| Q0ZCJ2    | Immunoglobulin heavy chain      | 24.3    | 38.8    | 1.60 | 37.4    | 1.54 | 28.2    | 1.16 | 41.6    | 1.71 | 35.7    | 1.47 | 27.7    | 1.14 | 26.7    | 1.10 |
| Q59EP2    | Angiotensinogen variant (Fr     | 2105.4  | 2605.1  | 1.24 | 2571.8  | 1.22 | 2309.7  | 1.10 | 2338.5  | 1.11 | 2834.5  | 1.35 | 2294.5  | 1.09 | 2443    | 1.16 |
| A6XNE2    | Complement factor D prepr       | 564.6   | 781.8   | 1.38 | 804.9   | 1.43 | 590.3   | 1.05 | 636.8   | 1.13 | 704     | 1.25 | 786.6   | 1.39 | 728.6   | 1.29 |
| A0A068LKI | Ig heavy chain variable regi    | 666.2   | 671.9   | 1.01 | 506.6   | 0.76 | 675.4   | 1.01 | 667.3   | 1.00 | 777.7   | 1.17 | 516.7   | 0.78 | 714.8   | 1.07 |
| Q9HD89    | Resistin OS=Homo sapiens        | 1785.5  | 2217.6  | 1.24 | 1779.3  | 1.00 | 1616.5  | 0.91 | 2079    | 1.16 | 2087.2  | 1.17 | 2264.9  | 1.27 | 2240.8  | 1.25 |
| P07900    | Heat shock protein HSP 90-      | 1472.5  | 1982.8  | 1.35 | 1471.1  | 1.00 | 1355.8  | 0.92 | 1550    | 1.05 | 1803.6  | 1.22 | 1925.8  | 1.31 | 1429.5  | 0.97 |
| Q9HCN6    | Platelet glycoprotein VI OS=    | 5334.1  | 5401.9  | 1.01 | 4653    | 0.87 | 3841    | 0.72 | 4876.3  | 0.91 | 5472.5  | 1.03 | 4774.4  | 0.90 | 4989.3  | 0.94 |
| P05937    | Calbindin OS=Homo sapien        | 2335.8  | 3120.3  | 1.34 | 2021.4  | 0.87 | 2552.3  | 1.09 | 2504.5  | 1.07 | 2977.9  | 1.27 | 2806    | 1.20 | 3014.6  | 1.29 |
| Q13332    | Receptor-type tyrosine-prot     | 855.9   | 915.3   | 1.07 | 826.1   | 0.97 | 720.2   | 0.84 | 816.5   | 0.95 | 883.4   | 1.03 | 844     | 0.99 | 710.9   | 0.83 |
| P05164    | Myeloperoxidase OS=Homo         | 1404.2  | 2474.9  | 1.76 | 1795.9  | 1.28 | 1263.4  | 0.90 | 1544.4  | 1.10 | 1808.1  | 1.29 | 2952.7  | 2.10 | 2311.4  | 1.65 |
| P08138    | Tumor necrosis factor recep     | 6441.7  | 6089.6  | 0.95 | 5018.9  | 0.78 | 4209.4  | 0.65 | 6183.3  | 0.96 | 5837.5  | 0.91 | 5233.7  | 0.81 | 5392    | 0.84 |
| Q5TFQ8    | Signal-regulatory protein be    |         |         |      |         |      |         |      |         |      |         |      |         |      |         |      |
| X5D7A8    | Cell adhesion molecule 1 isc    | 4714.4  | 4355.4  | 0.92 | 3410.7  | 0.72 | 3144.4  | 0.67 | 4044    | 0.86 | 4109.3  | 0.87 | 4185.9  | 0.89 | 4041.7  | 0.86 |
| P00352    | Retinal dehydrogenase 1 OS      | 1152.8  | 1665.4  | 1.44 | 1147    | 0.99 | 1404.6  | 1.22 | 1296    | 1.12 | 1586.3  | 1.38 | 1485.7  | 1.29 | 1109.5  | 0.96 |



|           |                                |         |         |      |         |      |        |      |         |      |         |      |         |      |         |      |
|-----------|--------------------------------|---------|---------|------|---------|------|--------|------|---------|------|---------|------|---------|------|---------|------|
| Q16769    | Glutaminy-peptide cyclotra     | 6127    | 5273.8  | 0.86 | 4544.2  | 0.74 | 3676   | 0.60 | 4501.6  | 0.73 | 5319.2  | 0.87 | 5943    | 0.97 | 4307.9  | 0.70 |
| A0A024R5I | Prolylcarboxypeptidase (An     | 2154.2  | 2348.5  | 1.09 | 1816.3  | 0.84 | 1623.9 | 0.75 | 2294.1  | 1.06 | 2412.9  | 1.12 | 2636.9  | 1.22 | 2051.7  | 0.95 |
| Q8TDO0    | Hepatitis A virus cellular rec | 12319.8 | 11849.5 | 0.96 | 10111.4 | 0.82 | 8585.3 | 0.70 | 12179.6 | 0.99 | 12614.3 | 1.02 | 11397.2 | 0.93 | 12392.8 | 1.01 |
| Q9UIB8    | SLAM family member 5 OS        | 2814.1  | 2794.8  | 0.99 | 2510.8  | 0.89 | 2060   | 0.73 | 2804    | 1.00 | 2646.8  | 0.94 | 2772.8  | 0.99 | 2812.1  | 1.00 |
| A0A087WZ  | Ribonuclease T2 OS=Homo        | 1668.3  | 1726.6  | 1.03 | 1731.7  | 1.04 | 1292.8 | 0.77 | 1821.6  | 1.09 | 1698.9  | 1.02 | 1554    | 0.93 | 1615.7  | 0.97 |
| A0A024RAI | Betaine-homocysteine meth      | 221.3   | 337.8   | 1.53 | 237.5   | 1.07 | 290.9  | 1.31 | 222.5   | 1.01 | 268.4   | 1.21 | 288.7   | 1.30 | 217.4   | 0.98 |
| O94910    | Adhesion G protein-coupled     | 1235.7  | 1408.8  | 1.14 | 1034.8  | 0.84 | 1152.5 | 0.93 | 1145.8  | 0.93 | 1207    | 0.98 | 1139.3  | 0.92 | 1024.2  | 0.83 |
| Q9Y2E5    | Epididymis-specific alpha-n    | 1984.9  | 2511.5  | 1.27 | 1880.1  | 0.95 | 1749.3 | 0.88 | 2266.8  | 1.14 | 2665.7  | 1.34 | 2456.1  | 1.24 | 1958.5  | 0.99 |
| Q6ICS1    | Putative uncharacterized pr    | 30.7    | 29.8    | 0.97 | 68.7    | 2.24 | 29.7   | 0.97 | 27.5    | 0.90 | 40.9    | 1.33 | 61.3    | 2.00 | 41.6    | 1.36 |
| P07737    | Profilin-1 OS=Homo sapien      | 2994    | 4046.8  | 1.35 | 4969.7  | 1.66 | 2210.9 | 0.74 | 3424.1  | 1.14 | 3815.9  | 1.27 | 3843.3  | 1.28 | 3985.6  | 1.33 |
| O96009    | Napsin-A OS=Homo sapien        | 5563.1  | 7511.5  | 1.35 | 5588.8  | 1.00 | 4732.2 | 0.85 | 6183.3  | 1.11 | 8213.1  | 1.48 | 8080.5  | 1.45 | 6626.3  | 1.19 |
| O43707    | Alpha-actinin-4 OS=Homo        | 766.8   | 1027.5  | 1.34 | 816.9   | 1.07 | 685.2  | 0.89 | 836.7   | 1.09 | 908.5   | 1.18 | 865.1   | 1.13 | 836.4   | 1.09 |
| B3KQF4    | cDNA FLJ90373 fis, clone       | 1549.3  | 1424.4  | 0.92 | 1623.5  | 1.05 | 1361.2 | 0.88 | 1355.5  | 0.87 | 1601    | 1.03 | 910.3   | 0.59 | 1127.4  | 0.73 |
| E7EX29    | 14-3-3 protein zeta/delta (Fr  | 2159.2  | 3019.6  | 1.40 | 2253.7  | 1.04 | 1805.9 | 0.84 | 2220.8  | 1.03 | 2654.9  | 1.23 | 2262.3  | 1.05 | 2440.6  | 1.13 |
| A0A024RAA | Carboxypeptidase OS=Hom        | 1637.3  | 2082.3  | 1.27 | 1494.3  | 0.91 | 1678.4 | 1.03 | 1755.8  | 1.07 | 1866.3  | 1.14 | 2239.4  | 1.37 | 1659.7  | 1.01 |
| Q03591    | Complement factor H-relate     | 1680.8  | 1255.8  | 0.75 | 1348.3  | 0.80 | 1029.9 | 0.61 | 1501    | 0.89 | 1546.7  | 0.92 | 1320.3  | 0.79 | 1395    | 0.83 |
| Q0ZCI8    | Immunglobulin heavy chain      | 3187.9  | 3687    | 1.16 | 2573.4  | 0.81 | 3131.5 | 0.98 | 3709.9  | 1.16 | 3624.2  | 1.14 | 3036.7  | 0.95 | 4086.2  | 1.28 |
| Q86T13    | C-type lectin domain family    | 3765.5  | 3762.7  | 1.00 | 3412.6  | 0.91 | 2841.4 | 0.75 | 3417.4  | 0.91 | 3589.2  | 0.95 | 3429    | 0.91 | 3131.1  | 0.83 |
| B2R5M8    | Isocitrate dehydrogenase [N    | 1994.9  | 2637.9  | 1.32 | 2191.9  | 1.10 | 1916.5 | 0.96 | 2227.2  | 1.12 | 2655.5  | 1.33 | 2079    | 1.04 | 1758.9  | 0.88 |
| F5H265    | Polyubiquitin-C (Fragment)     | 9502.6  | 8762.6  | 0.92 | 9627.2  | 1.01 | 6689.7 | 0.70 | 9272.1  | 0.98 | 9372.1  | 0.99 | 9688.2  | 1.02 | 8035.3  | 0.85 |
| P12273    | Prolactin-inducible protein    | 5909.5  | 6014.5  | 1.02 | 5684.5  | 0.96 | 3471.5 | 0.59 | 12194.5 | 2.06 | 6161    | 1.04 | 4771.9  | 0.81 | 4172.1  | 0.71 |
| A8K4K1    | cDNA FLJ78216, highly sin      | 2325.6  | 2706.7  | 1.16 | 2104.8  | 0.91 | 2049.9 | 0.88 | 2339    | 1.01 | 2351.3  | 1.01 | 2887.8  | 1.24 | 2295.4  | 0.99 |
| V9HW43    | Epididymis secretory protei    | 1213.8  | 1537.5  | 1.27 | 1307    | 1.08 | 1189.3 | 0.98 | 1315.5  | 1.08 | 1427    | 1.18 | 1456.7  | 1.20 | 1291.5  | 1.06 |
| A8K5S3    | cDNA FLJ78449 OS=Homo          | 5655.8  | 5732.7  | 1.01 | 4725.4  | 0.84 | 4608.2 | 0.81 | 5445.7  | 0.96 | 6607.4  | 1.17 | 5516.1  | 0.98 | 4576.7  | 0.81 |
| P07686    | Beta-hexosaminidase subun      | 3543.4  | 4263.5  | 1.20 | 2996    | 0.85 | 3163.9 | 0.89 | 3938.5  | 1.11 | 4365    | 1.23 | 4680.2  | 1.32 | 3690.5  | 1.04 |
| P23470    | Receptor-type tyrosine-prote   | 1622.6  | 1654.2  | 1.02 | 1650.3  | 1.02 | 1264.4 | 0.78 | 1576.3  | 0.97 | 1615.9  | 1.00 | 1460.7  | 0.90 | 1574    | 0.97 |
| P35527    | Keratin, type I cytoskeletal   | 4522.6  | 5294.4  | 1.17 | 3524    | 0.78 | 4589.8 | 1.01 | 4269.9  | 0.94 | 3950.4  | 0.87 | 4250.1  | 0.94 | 3597.8  | 0.80 |
| P55291    | Cadherin-15 OS=Homo sap        | 325.8   | 288     | 0.88 | 234.6   | 0.72 | 279.5  | 0.86 | 229.6   | 0.70 | 254.8   | 0.78 | 309.3   | 0.95 | 265.3   | 0.81 |
| Q92896    | Golgi apparatus protein 1 O    | 1840.1  | 2052.1  | 1.12 | 1838.1  | 1.00 | 1529.4 | 0.83 | 1753.1  | 0.95 | 1923.1  | 1.05 | 1985.1  | 1.08 | 1659.2  | 0.90 |
| P19013    | Keratin, type II cytoskeletal  | 765.5   | 1337.8  | 1.75 | 812.9   | 1.06 | 978.6  | 1.28 | 804.4   | 1.05 | 941.4   | 1.23 | 1621.4  | 2.12 | 1858.7  | 2.43 |
| A0A0X9T7  | GCT-A4 light chain variable    | 9483.6  | 9768.6  | 1.03 | 12718.8 | 1.34 | 6822   | 0.72 | 10547.4 | 1.11 | 9206.9  | 0.97 | 11836.9 | 1.25 | 10789.2 | 1.14 |
| Q9GZX9    | Twisted gastrulation protein   | 2924.7  | 2504.2  | 0.86 | 2159.2  | 0.74 | 1627.6 | 0.56 | 2503.7  | 0.86 | 2641.7  | 0.90 | 2572.4  | 0.88 | 2643.7  | 0.90 |
| A0A024RAI | Oxidised low density lipopr    | 1957.6  | 2452.2  | 1.25 | 1716.2  | 0.88 | 1613.3 | 0.82 | 2061.5  | 1.05 | 2389.4  | 1.22 | 1942.1  | 0.99 | 1780    | 0.91 |
| P02452    | Collagen alpha-1(I) chain O    | 3460.5  | 3928.9  | 1.14 | 3402.1  | 0.98 | 2538   | 0.73 | 4811.3  | 1.39 | 3750.4  | 1.08 | 4245.3  | 1.23 | 4631.9  | 1.34 |
| P35052    | Glypican-1 OS=Homo sapie       | 1240.3  | 1244.5  | 1.00 | 1141.8  | 0.92 | 1047.5 | 0.84 | 1204.3  | 0.97 | 1242.2  | 1.00 | 1150    | 0.93 | 1060    | 0.85 |
| Q9UBC9    | Small proline-rich protein 3   | 9233.8  | 5390.1  | 0.58 | 12762   | 1.38 | 9129   | 0.99 | 10573.1 | 1.15 | 8360.2  | 0.91 | 6416    | 0.69 | 11899.2 | 1.29 |
| A0N5G1    | Rheumatoid factor C6 light     | 2204.4  | 2360.1  | 1.07 | 1989.1  | 0.90 | 1960.5 | 0.89 | 1873.6  | 0.85 | 2111.2  | 0.96 | 2171    | 0.98 | 2250.6  | 1.02 |
| O43490    | Prominin-1 OS=Homo sapie       | 1212.4  | 1222.6  | 1.01 | 997     | 0.82 | 966.4  | 0.80 | 1167.5  | 0.96 | 1296    | 1.07 | 1105.4  | 0.91 | 952.1   | 0.79 |
| A2NZ55    | Variable immunoglobulin ant    | 102.9   | 147.8   | 1.44 | 123.4   | 1.20 | 193.1  | 1.88 | 127.9   | 1.24 | 134.6   | 1.31 | 110.3   | 1.07 | 102.6   | 1.00 |
| Q8IWU5    | Extracellular sulfatase Sulf-  | 10985.6 | 10334.4 | 0.94 | 8417.1  | 0.77 | 7503.2 | 0.68 | 10138.2 | 0.92 | 10534.8 | 0.96 | 12935.1 | 1.18 | 9686.6  | 0.88 |
| P02533    | Keratin, type I cytoskeletal   |         |         |      |         |      |        |      |         |      |         |      |         |      |         |      |
| K4DIA0    | ICOS ligand OS=Homo sap        | 5031.9  | 5079.2  | 1.01 | 4272.8  | 0.85 | 3998.4 | 0.79 | 4664.2  | 0.93 | 4927    | 0.98 | 5008.9  | 1.00 | 4414    | 0.88 |
| G9K388    | YWHAE/FAM22A fusion p          | 553.6   | 679.3   | 1.23 | 470.5   | 0.85 | 511.8  | 0.92 | 544.3   | 0.98 | 687.1   | 1.24 | 594.4   | 1.07 | 534.4   | 0.97 |
| P01036    | Cystatin-S OS=Homo sapie       | 1649.6  | 1438.1  | 0.87 | 1542.3  | 0.93 | 1180.3 | 0.72 | 1476.5  | 0.90 | 1583.9  | 0.96 | 1129.7  | 0.68 | 1276.4  | 0.77 |
| A0A140VK  | Testicular secretory protein   | 1333    | 1582.4  | 1.19 | 931.6   | 0.70 | 1596.7 | 1.20 | 1267.1  | 0.95 | 1527.6  | 1.15 | 1622.4  | 1.22 | 1341.4  | 1.01 |
| P61626    | Lysozyme C OS=Homo sap         | 2357.3  | 3032.5  | 1.29 | 2727.6  | 1.16 | 1886.7 | 0.80 | 2625.8  | 1.11 | 2860.8  | 1.21 | 2982.3  | 1.27 | 2609.5  | 1.11 |
| E7EMB3    | Calmodulin OS=Homo sapi        | 2471    | 2441.8  | 0.99 | 1992    | 0.81 | 1697.6 | 0.69 | 2329.9  | 0.94 | 2483.3  | 1.00 | 2298    | 0.93 | 2206.6  | 0.89 |
| G5EA09    | Syndecan binding protein (S    | 873.8   | 883.9   | 1.01 | 839.2   | 0.96 | 687.6  | 0.79 | 935.9   | 1.07 | 1056.2  | 1.21 | 818.4   | 0.94 | 776.2   | 0.89 |
| B0YJ88    | Radixin OS=Homo sapiens        | 241.6   | 311.9   | 1.29 | 233.5   | 0.97 | 281.2  | 1.16 | 249.1   | 1.03 | 280.8   | 1.16 | 295.1   | 1.22 | 224.3   | 0.93 |
| Q5SZK8    | FRAS1-related extracellular    | 719     | 792.6   | 1.10 | 737.9   | 1.03 | 594.6  | 0.83 | 761.9   | 1.06 | 773.3   | 1.08 | 804.4   | 1.12 | 675     | 0.94 |
| B7ZLI0    | Reticulon 4 receptor-like 2    | 2004.2  | 2245.9  | 1.12 | 1658.8  | 0.83 | 1591.9 | 0.79 | 1972.1  | 0.98 | 2026.8  | 1.01 | 2360.3  | 1.18 | 1624.4  | 0.81 |
| P36980    | Complement factor H-relate     | 120.1   | 134.1   | 1.12 | 423.3   | 3.52 | 103.5  | 0.86 | 108.3   | 0.90 | 139.9   | 1.16 | 112.3   | 0.94 | 117.5   | 0.98 |
| P08779    | Keratin, type I cytoskeletal   | 560.6   | 654     | 1.17 | 462.9   | 0.83 | 554.2  | 0.99 | 480     | 0.86 | 472.5   | 0.84 | 584     | 1.04 | 484     | 0.86 |
| A0A0B4J1X | Immunoglobulin heavy vari      | 655     | 728.4   | 1.11 | 496.3   | 0.76 | 518.8  | 0.79 | 706.7   | 1.08 | 598.3   | 0.91 | 825     | 1.26 | 743.9   | 1.14 |
| Q9NZZ3    | Charged multivesicular bod     | 2219.9  | 2103.7  | 0.95 | 1732.4  | 0.78 | 1767.8 | 0.80 | 1974.2  | 0.89 | 2283.4  | 1.03 | 2130.3  | 0.96 | 1763.5  | 0.79 |
| P54760    | Ephrin type-B receptor 4 OS    | 3845.3  | 4150.1  | 1.08 | 3597.8  | 0.94 | 3661.3 | 0.95 | 3917.5  | 1.02 | 4111.6  | 1.07 | 3935.4  | 1.02 | 3866.3  | 1.01 |
| B5BU24    | 14-3-3 protein beta/alpha O    | 417.7   | 540.2   | 1.29 | 366.4   | 0.88 | 401.3  | 0.96 | 437.2   | 1.05 | 510.3   | 1.22 | 484     | 1.16 | 437.3   | 1.05 |
| P00918    | Carbonic anhydrase 2 OS=H      | 2325.9  | 3153.7  | 1.36 | 2148.2  | 0.92 | 2165.8 | 0.93 | 2471.6  | 1.06 | 3115.3  | 1.34 | 3077.6  | 1.32 | 2633.3  | 1.13 |

|           |                               |         |        |      |         |      |        |      |         |      |         |      |        |      |         |      |
|-----------|-------------------------------|---------|--------|------|---------|------|--------|------|---------|------|---------|------|--------|------|---------|------|
| Q9NXI0    | cDNA FLJ20242 fis, clone      | 4622.8  | 4281.8 | 0.93 | 4055.2  | 0.88 | 3679.7 | 0.80 | 4597    | 0.99 | 5375.9  | 1.16 | 4133.3 | 0.89 | 3868    | 0.84 |
| B4DRC8    | cDNA FLJ50047 OS=Hom          | 1667.8  | 1742.5 | 1.04 | 1525.8  | 0.91 | 1295   | 0.78 | 1580.4  | 0.95 | 1695.9  | 1.02 | 1801.9 | 1.08 | 1645.9  | 0.99 |
| P13727    | Bone marrow proteoglycan      | 1435.9  | 1267.2 | 0.88 | 1601.6  | 1.12 | 1054.8 | 0.73 | 1330.5  | 0.93 | 1262.3  | 0.88 | 1452.9 | 1.01 | 979.8   | 0.68 |
| A0A024R6U | G protein-coupled receptor    | 1492.5  | 1542.9 | 1.03 | 1553.7  | 1.04 | 1174.7 | 0.79 | 1514.9  | 1.02 | 1606.5  | 1.08 | 1744.4 | 1.17 | 1340.7  | 0.90 |
| Q1HP67    | Lipoprotein, Lp(A) OS=Hor     | 2730.5  | 2174.3 | 0.80 | 2279.4  | 0.83 | 2206.5 | 0.81 | 2303.6  | 0.84 | 2567.9  | 0.94 | 2156.5 | 0.79 | 2616.5  | 0.96 |
| P08727    | Keratin, type I cytoskeletal  | 1779.3  | 2142   | 1.20 | 1364.5  | 0.77 | 1990.4 | 1.12 | 1636.9  | 0.92 | 1657.7  | 0.93 | 1925.6 | 1.08 | 2072.4  | 1.16 |
| Q9UL86    | Myosin-reactive immunoglo     | 1607.2  | 1789.8 | 1.11 | 1610.9  | 1.00 | 1129.5 | 0.70 | 1322.2  | 0.82 | 1775.7  | 1.10 | 1837.6 | 1.14 | 2061.6  | 1.28 |
| P08572    | Collagen alpha-2(IV) chain    | 1789.4  | 2006.7 | 1.12 | 1716.7  | 0.96 | 1584.4 | 0.89 | 1839.5  | 1.03 | 1975.3  | 1.10 | 1847.8 | 1.03 | 1623.4  | 0.91 |
| P01037    | Cystatin-SN OS=Homo sap       | 21.5    | 24.8   | 1.15 | 28.8    | 1.34 | 27.4   | 1.27 | 21.9    | 1.02 | 22.3    | 1.04 | 19.6   | 0.91 | 19.4    | 0.90 |
| B7ZL91    | Mepripin A subunit OS=Hom     | 2072.7  | 2291.6 | 1.11 | 2357.6  | 1.14 | 1893.1 | 0.91 | 1972    | 0.95 | 2081.8  | 1.00 | 2006.6 | 0.97 | 1956.4  | 0.94 |
| Q562M3    | Actin-like protein (Fragmen   | 55.1    | 74.8   | 1.36 | 64.7    | 1.17 | 55.9   | 1.01 | 55.6    | 1.01 | 75.9    | 1.38 | 66.1   | 1.20 | 64.7    | 1.17 |
| P08697    | Alpha-2-antiplasmin OS=Hc     | 1902.8  | 2105.7 | 1.11 | 1715.7  | 0.90 | 1461.5 | 0.77 | 1904.1  | 1.00 | 2323.6  | 1.22 | 2062.6 | 1.08 | 1827.3  | 0.96 |
| O43653    | Prostate stem cell antigen O  | 14644.6 | 12636  | 0.86 | 8903    | 0.61 | 7470.4 | 0.51 | 12814.1 | 0.88 | 19102.5 | 1.30 | 9102   | 0.62 | 7892.3  | 0.54 |
| B1N7B8    | Cryocryoglobulin CC1 ka       | 287.4   | 317.5  | 1.10 | 330.5   | 1.15 | 195.3  | 0.68 | 310.9   | 1.08 | 269.9   | 0.94 | 372.9  | 1.30 | 295.6   | 1.03 |
| J3KPS3    | Fructose-bisphosphate aldol   | 1637.1  | 2061.1 | 1.26 | 1731.8  | 1.06 | 1659.4 | 1.01 | 1871    | 1.14 | 1945.5  | 1.19 | 1787   | 1.09 | 1970.7  | 1.20 |
| E9PKP4    | Macrophage colony-stimula     | 117     | 161    | 1.38 | 130.3   | 1.11 | 93.3   | 0.80 | 156     | 1.33 | 122.2   | 1.04 | 153.8  | 1.31 | 125.3   | 1.07 |
| G3V3D1    | Epididymal secretory protei   | 5185.3  | 5071.2 | 0.98 | 4544.1  | 0.88 | 4043.5 | 0.78 | 5687.7  | 1.10 | 5665    | 1.09 | 5183.7 | 1.00 | 4749.9  | 0.92 |
| M9MML6    | Low affinity immunoglobuli    | 5907.2  | 5733   | 0.97 | 4810.8  | 0.81 | 4415.7 | 0.75 | 5931    | 1.00 | 5551.6  | 0.94 | 4437.6 | 0.75 | 5472.1  | 0.93 |
| K7EKE8    | Nectin-2 (Fragment) OS=Hc     | 69.3    | 70.9   | 1.02 | 60.7    | 0.88 | 61.4   | 0.89 | 64.3    | 0.93 | 70.6    | 1.02 | 67.9   | 0.98 | 56.4    | 0.81 |
| P05787    | Keratin, type II cytoskeletal | 378.4   | 585.3  | 1.55 | 414.8   | 1.10 | 335.9  | 0.89 | 397.8   | 1.05 | 473.5   | 1.25 | 529    | 1.40 | 784.1   | 2.07 |
| V9HW77    | Epididymis luminal protein    | 765.9   | 884.9  | 1.16 | 860     | 1.12 | 777.8  | 1.02 | 764.6   | 1.00 | 831.3   | 1.09 | 647.8  | 0.85 | 591.7   | 0.77 |
| Q96KP4    | Cytosolic non-specific dipep  | 620     | 933.4  | 1.51 | 723     | 1.17 | 968.5  | 1.56 | 723.4   | 1.17 | 839.6   | 1.35 | 784.8  | 1.27 | 687.6   | 1.11 |
| A0A140VJI | Dipeptidase OS=Homo sapi      | 1991.3  | 2516.8 | 1.26 | 1651.9  | 0.83 | 1699.5 | 0.85 | 1992.2  | 1.00 | 2163.6  | 1.09 | 2087.6 | 1.05 | 1612.2  | 0.81 |
| Q9HCC1    | Single chain Fv (Fragment)    | 59.9    | 55.8   | 0.93 | 45.9    | 0.77 | 53.9   | 0.90 | 44.4    | 0.74 | 50.4    | 0.84 | 44     | 0.73 | 47.9    | 0.80 |
| P01624    | Immunoglobulin kappa vari     | 394.7   | 321.4  | 0.81 | 341.2   | 0.86 | 274.6  | 0.70 | 335.5   | 0.85 | 342.8   | 0.87 | 380.3  | 0.96 | 421.6   | 1.07 |
| P08238    | Heat shock protein HSP 90-    | 175.5   | 223.9  | 1.28 | 161.2   | 0.92 | 144.4  | 0.82 | 165.2   | 0.94 | 201.9   | 1.15 | 220.2  | 1.25 | 164.8   | 0.94 |
| A8K486    | Peptidyl-prolyl cis-trans is  | 2486.2  | 3466   | 1.39 | 3071.8  | 1.24 | 2421.9 | 0.97 | 3017.3  | 1.21 | 3213.8  | 1.29 | 2980.3 | 1.20 | 2738    | 1.10 |
| A8K3I0    | cDNA FLJ78437, highly sin     | 1548.7  | 1635.7 | 1.06 | 1251.2  | 0.81 | 1235.1 | 0.80 | 1517.7  | 0.98 | 1531.9  | 0.99 | 1335.8 | 0.86 | 1377.3  | 0.89 |
| H3BUX1    | Mesothelin (Fragment) OS=     | 170.1   | 249.1  | 1.46 | 163.7   | 0.96 | 158.5  | 0.93 | 163.8   | 0.96 | 195.9   | 1.15 | 179.5  | 1.06 | 159.4   | 0.94 |
| A5PLM9    | Cathepsin L1 OS=Homo sap      | 2498    | 2778.1 | 1.11 | 2427.9  | 0.97 | 1997.4 | 0.80 | 2643    | 1.06 | 2692.1  | 1.08 | 2451.3 | 0.98 | 2328    | 0.93 |
| A0A140VK  | Testis tissue sperm-binding   | 486.1   | 712.7  | 1.47 | 614.6   | 1.26 | 655.5  | 1.35 | 545.8   | 1.12 | 594.5   | 1.22 | 648.9  | 1.33 | 610.7   | 1.26 |
| A0A0C4DG  | Poliovirus receptor OS=Hor    | 4425    | 3861.3 | 0.87 | 3487.2  | 0.79 | 3365.3 | 0.76 | 4192.5  | 0.95 | 4276.3  | 0.97 | 4492.2 | 1.02 | 3807.5  | 0.86 |
| A0A0G2JNI | Ephrin type-B receptor 6 OS   | 1083.3  | 1132.9 | 1.05 | 1158.7  | 1.07 | 848.8  | 0.78 | 1042.2  | 0.96 | 1122.4  | 1.04 | 1062.7 | 0.98 | 929     | 0.86 |
| Q92692    | Nectin-2 OS=Homo sapiens      | 2261.7  | 2270.3 | 1.00 | 1939.5  | 0.86 | 1743.8 | 0.77 | 2226    | 0.98 | 2396.9  | 1.06 | 2911.6 | 1.29 | 2197.8  | 0.97 |
| H9ZYJ2    | Thioredoxin OS=Homo sap       | 5069.4  | 5920.6 | 1.17 | 4943.4  | 0.98 | 3751.3 | 0.74 | 4701.9  | 0.93 | 5871.3  | 1.16 | 4765.7 | 0.94 | 5276.5  | 1.04 |
| V9HW87    | Abhydrolase domain contain    | 868.9   | 1439.8 | 1.66 | 1138.1  | 1.31 | 739.7  | 0.85 | 917.8   | 1.06 | 1029.2  | 1.18 | 1228.9 | 1.41 | 1033.4  | 1.19 |
| A0A0S2Z4F | Secretoglobin family 1A me    | 13735   | 5373.7 | 0.39 | 10779.9 | 0.78 | 5773   | 0.42 | 7533.6  | 0.55 | 32076.5 | 2.34 | 6110.8 | 0.44 | 10733.6 | 0.78 |
| C9JC84    | Fibrinogen gamma chain OS     | 884.6   | 1762.4 | 1.99 | 1127.8  | 1.27 | 921.8  | 1.04 | 1226.6  | 1.39 | 1006.6  | 1.14 | 1831.3 | 2.07 | 1206.5  | 1.36 |
| P09228    | Cystatin-SA OS=Homo sapi      | 244.6   | 278.3  | 1.14 | 284.7   | 1.16 | 226.7  | 0.93 | 292.8   | 1.20 | 253.7   | 1.04 | 251.4  | 1.03 | 237.9   | 0.97 |
| A8K4G7    | cDNA FLJ78528, highly sin     | 601.9   | 638    | 1.06 | 489.7   | 0.81 | 518.1  | 0.86 | 602.5   | 1.00 | 679.2   | 1.13 | 581.9  | 0.97 | 499.3   | 0.83 |
| C9JKV3    | Tissue factor pathway inhibi  | 1101.7  | 1181.8 | 1.07 | 852.8   | 0.77 | 901.8  | 0.82 | 942.7   | 0.86 | 1054.1  | 0.96 | 869.6  | 0.79 | 927     | 0.84 |
| S6BGD4    | IgG H chain OS=Homo sapi      | 351.9   | 392.9  | 1.12 | 315.7   | 0.90 | 333.3  | 0.95 | 324.3   | 0.92 | 320.8   | 0.91 | 328.6  | 0.93 | 425.2   | 1.21 |
| V9HWE0    | Annexin OS=Homo sapiens       | 1625.8  | 1873.1 | 1.15 | 1360.8  | 0.84 | 1963.9 | 1.21 | 1753.5  | 1.08 | 1865.3  | 1.15 | 2098.8 | 1.29 | 1405.2  | 0.86 |
| Q14982    | Opioid-binding protein/cell   | 1754.3  | 1496.7 | 0.85 | 1676.5  | 0.96 | 1148.8 | 0.65 | 1532.7  | 0.87 | 1632.2  | 0.93 | 1519.2 | 0.87 | 1356    | 0.77 |
| P13647    | Keratin, type II cytoskeletal | 11      | 21.6   | 1.96 | 9.1     | 0.83 | 7.1    | 0.65 | 8.4     | 0.76 | 16.2    | 1.47 | 22.9   | 2.08 | 22.9    | 2.08 |
| B4E0X1    | Beta-2-microglobulin OS=H     | 8163.5  | 8072.4 | 0.99 | 27383.9 | 3.35 | 6068.4 | 0.74 | 8892.8  | 1.09 | 12376.4 | 1.52 | 9033.9 | 1.11 | 8006.1  | 0.98 |
| Q05707    | Collagen alpha-1(XIV) chai    | 720.9   | 783.6  | 1.09 | 614.6   | 0.85 | 602.1  | 0.84 | 688     | 0.95 | 701.7   | 0.97 | 696.8  | 0.97 | 716.8   | 0.99 |
| Q76LA1    | CSTB protein OS=Homo sa       | 1626.1  | 1792.2 | 1.10 | 2064.4  | 1.27 | 1233   | 0.76 | 1965.6  | 1.21 | 1713.9  | 1.05 | 1753   | 1.08 | 1810    | 1.11 |
| A8K6A7    | Alpha-mannosidase OS=Ho       | 844.5   | 1033.4 | 1.22 | 998     | 1.18 | 803.8  | 0.95 | 1030.8  | 1.22 | 1014.1  | 1.20 | 1059.9 | 1.26 | 973.7   | 1.15 |
| Q8N2S1    | Latent-transforming growth    | 739     | 768    | 1.04 | 688     | 0.93 | 519.9  | 0.70 | 703.5   | 0.95 | 698.4   | 0.95 | 661.8  | 0.90 | 604     | 0.82 |
| V9HVV1    | Epididymis secretory sperm    | 1138.4  | 2437.8 | 2.14 | 1557.3  | 1.37 | 1260.8 | 1.11 | 1609.1  | 1.41 | 1335.7  | 1.17 | 2788.9 | 2.45 | 1464.8  | 1.29 |
| P22352    | Glutathione peroxidase 3 OS   | 2075.2  | 2563.6 | 1.24 | 1964.2  | 0.95 | 1772.7 | 0.85 | 2023.5  | 0.98 | 2386.6  | 1.15 | 2515.8 | 1.21 | 2003.7  | 0.97 |
| P11717    | Cation-independent mannos     | 1096.8  | 1217.3 | 1.11 | 1113.5  | 1.02 | 1042.7 | 0.95 | 1078    | 0.98 | 1216.5  | 1.11 | 1059.4 | 0.97 | 956.8   | 0.87 |
| P39060    | Collagen alpha-1(XVIII) ch    | 1567.8  | 1910.3 | 1.22 | 1467.7  | 0.94 | 1426.3 | 0.91 | 1755.9  | 1.12 | 1902.5  | 1.21 | 2016   | 1.29 | 1518    | 0.97 |
| P27348    | 14-3-3 protein theta OS=Ho    | 37.8    | 52.7   | 1.39 | 37.6    | 0.99 | 34.9   | 0.92 | 39      | 1.03 | 41.4    | 1.10 | 41.7   | 1.10 | 39      | 1.03 |
| B1B5Q3    | N-acylsphingosine amidohy     | 1108.7  | 1559   | 1.41 | 1181    | 1.07 | 1166.2 | 1.05 | 1323.7  | 1.19 | 1705.7  | 1.54 | 1682.7 | 1.52 | 1500.7  | 1.35 |
| A0A109PSY | MS-A1 light chain variable    | 411.4   | 455    | 1.11 | 431.8   | 1.05 | 370.7  | 0.90 | 444.7   | 1.08 | 431.1   | 1.05 | 411.4  | 1.00 | 428.1   | 1.04 |
| A0A024R39 | Chromosome 11 open readi      | 1446.6  | 1945.7 | 1.35 | 1614.2  | 1.12 | 1283.9 | 0.89 | 1666.3  | 1.15 | 1650    | 1.14 | 2075.1 | 1.43 | 1584.4  | 1.10 |



|            |                                           |        |        |      |        |      |        |      |        |      |        |      |        |      |        |      |
|------------|-------------------------------------------|--------|--------|------|--------|------|--------|------|--------|------|--------|------|--------|------|--------|------|
| Q13421     | Mesothelin OS=Homo sapiens                | 1462.1 | 1033   | 0.71 | 1805.3 | 1.23 | 751    | 0.51 | 1180.2 | 0.81 | 1765.3 | 1.21 | 1419.5 | 0.97 | 1448   | 0.99 |
| A8K6D3     | cDNA FLJ75873, highly similar to          | 1294   | 1358.1 | 1.05 | 1103.2 | 0.85 | 988    | 0.76 | 1166.2 | 0.90 | 1415.7 | 1.09 | 1275.2 | 0.99 | 1133.8 | 0.88 |
| Q8NDA2     | Hemacentin-2 OS=Homo sapiens              | 679.7  | 741.1  | 1.09 | 706.9  | 1.04 | 610.5  | 0.90 | 663.3  | 0.98 | 641.7  | 0.94 | 672    | 0.99 | 596.5  | 0.88 |
| A0A024R1C1 | N-acetylgalactosaminidase, alpha-N        | 1806.1 | 2261.6 | 1.25 | 1739.8 | 0.96 | 1422.2 | 0.79 | 1984.7 | 1.10 | 2477.3 | 1.37 | 2374.5 | 1.31 | 1700.8 | 0.94 |
| A8K6Q6     | cDNA FLJ78639 OS=Homo sapiens             | 837.3  | 775.7  | 0.93 | 685.6  | 0.82 | 553    | 0.66 | 734.5  | 0.88 | 755.4  | 0.90 | 737.5  | 0.88 | 753.9  | 0.90 |
| P23284     | Peptidyl-prolyl cis-trans isomerase       | 1480   | 1717.7 | 1.16 | 1360.3 | 0.92 | 1310   | 0.89 | 1516.1 | 1.02 | 1553.2 | 1.05 | 1487.8 | 1.01 | 1248.4 | 0.84 |
| Q14126     | Desmoglein-2 OS=Homo sapiens              | 704.3  | 794.2  | 1.13 | 800    | 1.14 | 692.7  | 0.98 | 683.2  | 0.97 | 726.5  | 1.03 | 770.9  | 1.09 | 578.8  | 0.82 |
| Q59ED3     | Intercellular adhesion molecule 1         | 1945.1 | 1898.1 | 0.98 | 1659.3 | 0.85 | 1243.9 | 0.64 | 1789.1 | 0.92 | 1746.1 | 0.90 | 2055.2 | 1.06 | 2153.6 | 1.11 |
| B7Z831     | cDNA FLJ55176, highly similar to          | 2556.4 | 2676.3 | 1.05 | 2457.3 | 0.96 | 2803.3 | 1.10 | 2612.9 | 1.02 | 2971.4 | 1.16 | 2351.5 | 0.92 | 2022.2 | 0.79 |
| P01700     | Immunoglobulin lambda variable            | 1537.5 | 1520.9 | 0.99 | 1749.6 | 1.14 | 1154.2 | 0.75 | 1661.1 | 1.08 | 1558.9 | 1.01 | 1592.1 | 1.04 | 1656.5 | 1.08 |
| P29508     | Serpin B3 OS=Homo sapiens                 | 519.3  | 561.3  | 1.08 | 590.2  | 1.14 | 447.5  | 0.86 | 790.4  | 1.52 | 582.3  | 1.12 | 466.5  | 0.90 | 684.4  | 1.32 |
| P98172     | Ephrin-B1 OS=Homo sapiens                 | 3677.8 | 3050.7 | 0.83 | 3759   | 1.02 | 2013.2 | 0.55 | 3383.4 | 0.92 | 3661.4 | 1.00 | 3374.9 | 0.92 | 3188.6 | 0.87 |
| E7EX88     | Aggrecan core protein OS=Homo sapiens     | 1450.7 | 2024.7 | 1.40 | 1575.7 | 1.09 | 1306.7 | 0.90 | 1555.7 | 1.07 | 1556.8 | 1.07 | 1473.4 | 1.02 | 1417.3 | 0.98 |
| A2JA16     | Anti-mucin1 light chain variable          | 377.5  | 702.5  | 1.86 | 405.7  | 1.07 | 430.9  | 1.14 | 485.7  | 1.29 | 382.2  | 1.01 | 438    | 1.16 | 467.6  | 1.24 |
| Q96J84     | Kin of IRRE-like protein 1                | 1097.2 | 1318.9 | 1.20 | 840.3  | 0.77 | 986.8  | 0.90 | 1015.7 | 0.93 | 1048.9 | 0.96 | 1137.5 | 1.04 | 990.5  | 0.90 |
| P68104     | Elongation factor 1-alpha 1               | 1493.6 | 1705.1 | 1.14 | 1612.9 | 1.08 | 1168.8 | 0.78 | 1489.6 | 1.00 | 1749.6 | 1.17 | 1777.2 | 1.19 | 1548.6 | 1.04 |
| A0A087WV1  | Osteoclast-associated immunoglobulin      | 2857.4 | 3216.3 | 1.13 | 3158.9 | 1.11 | 2454.7 | 0.86 | 3172.2 | 1.11 | 2889.2 | 1.01 | 3037.9 | 1.06 | 2923.9 | 1.02 |
| A8KAM8     | Platelet-derived growth factor            | 442.6  | 488.6  | 1.10 | 387.3  | 0.88 | 391.2  | 0.88 | 417.2  | 0.94 | 473.1  | 1.07 | 453.9  | 1.03 | 423.8  | 0.96 |
| O43866     | CD5 antigen-like OS=Homo sapiens          | 2812.2 | 2915.9 | 1.04 | 2302.2 | 0.82 | 2112.3 | 0.75 | 2813.1 | 1.00 | 2794.9 | 0.99 | 2669.5 | 0.95 | 2457.7 | 0.87 |
| Q12841     | Follistatin-related protein 1             | 2041.7 | 2137.1 | 1.05 | 2142   | 1.05 | 1770.6 | 0.87 | 1852   | 0.91 | 2137.1 | 1.05 | 1484.7 | 0.73 | 1429.3 | 0.70 |
| P07204     | Thrombomodulin OS=Homo sapiens            | 383.3  | 448.8  | 1.17 | 342.6  | 0.89 | 303.9  | 0.79 | 350.7  | 0.91 | 372.6  | 0.97 | 385.9  | 1.01 | 329.5  | 0.86 |
| I6QTG3     | Glypican 3 isoform 2 OS=Homo sapiens      | 2113.6 | 2226.9 | 1.05 | 1935.4 | 0.92 | 1992   | 0.94 | 2312   | 1.09 | 2217.1 | 1.05 | 1851   | 0.88 | 1851.5 | 0.88 |
| P00966     | Argininosuccinate synthase                | 1519.8 | 2130.2 | 1.40 | 1520.8 | 1.00 | 1479.7 | 0.97 | 1635.5 | 1.08 | 2091.1 | 1.38 | 1963.9 | 1.29 | 1334.6 | 0.88 |
| Q13621     | Solute carrier family 12 member 1         | 1547.5 | 1528.9 | 0.99 | 1645.3 | 1.06 | 1148   | 0.74 | 1545.9 | 1.00 | 1657.9 | 1.07 | 1432.5 | 0.93 | 1143   | 0.74 |
| P55285     | Cadherin-6 OS=Homo sapiens                | 1088.4 | 916.1  | 0.84 | 913    | 0.84 | 740.3  | 0.68 | 936.4  | 0.86 | 994.5  | 0.91 | 1120.4 | 1.03 | 965    | 0.89 |
| B0AZL7     | cDNA, FLJ79457, highly similar to         | 753.7  | 840.1  | 1.11 | 715.5  | 0.95 | 642.2  | 0.85 | 684.2  | 0.91 | 780.4  | 1.04 | 800.9  | 1.06 | 638.8  | 0.85 |
| A0A075B7E1 | Protein IGHV3OR16-12 (F1)                 | 1917.7 | 1959.5 | 1.02 | 1475.5 | 0.77 | 1827.5 | 0.95 | 1905.3 | 0.99 | 1850.1 | 0.96 | 1647.3 | 0.86 | 1845.8 | 0.96 |
| A0A024R3F1 | Sortilin-related receptor, L1             | 1095.4 | 993.6  | 0.91 | 1061.1 | 0.97 | 784.7  | 0.72 | 1063.6 | 0.97 | 1101.1 | 1.01 | 1075   | 0.98 | 876.1  | 0.80 |
| P31151     | Protein S100-A7 OS=Homo sapiens           | 1722.6 | 956.5  | 0.56 | 741.2  | 0.43 | 659.2  | 0.38 | 1743.2 | 1.01 | 2212   | 1.28 | 1347.3 | 0.78 | 1983.1 | 1.15 |
| M1VKI3     | Tyrosine-protein kinase receptor          | 2867   | 2391.1 | 0.83 | 1882.6 | 0.66 | 1857.1 | 0.65 | 2297.2 | 0.80 | 2672.2 | 0.93 | 2363.3 | 0.82 | 2185.3 | 0.76 |
| A0A024R03  | Complement component 9, i                 | 1203   | 1434.3 | 1.19 | 1387.5 | 1.15 | 1429   | 1.19 | 1288.4 | 1.07 | 1302.7 | 1.08 | 1542.2 | 1.28 | 1810.6 | 1.51 |
| Q5KU26     | Collectin-12 OS=Homo sapiens              | 6136.8 | 5931.4 | 0.97 | 6072   | 0.99 | 3325.5 | 0.54 | 4204.7 | 0.69 | 4897.4 | 0.80 | 6084   | 0.99 | 4796.8 | 0.78 |
| Q9UGN4     | CMRF35-like molecule 8 OS=Homo sapiens    | 6215.1 | 5299.1 | 0.85 | 5026.6 | 0.81 | 3620.8 | 0.58 | 5487.6 | 0.88 | 5906.4 | 0.95 | 5248   | 0.84 | 5819.6 | 0.94 |
| B7Z1Z5     | cDNA FLJ57265, highly similar to          | 1546.6 | 1432.8 | 0.93 | 1276.1 | 0.83 | 1208.8 | 0.78 | 1321.2 | 0.85 | 1382.2 | 0.89 | 1366.6 | 0.88 | 1347.1 | 0.87 |
| Q9H8L6     | Multimerin-2 OS=Homo sapiens              | 2241.8 | 2527.5 | 1.13 | 1925.8 | 0.86 | 1892.7 | 0.84 | 2305.8 | 1.03 | 2331.8 | 1.04 | 2521.4 | 1.12 | 2189.7 | 0.98 |
| A8KAQ3     | cDNA FLJ76489, highly similar to          | 574.4  | 660.4  | 1.15 | 587.1  | 1.02 | 570.5  | 0.99 | 630.7  | 1.10 | 648.9  | 1.13 | 634.6  | 1.10 | 557.9  | 0.97 |
| P40925     | Malate dehydrogenase, cytosolic           | 1746.5 | 2093.6 | 1.20 | 1746.1 | 1.00 | 1809.7 | 1.04 | 1889.8 | 1.08 | 2335.3 | 1.34 | 1978.7 | 1.13 | 1738.8 | 1.00 |
| D3DTX7     | Collagen, type I, alpha 1, isoform        |        |        |      |        |      |        |      |        |      |        |      |        |      |        |      |
| A0A109PS5  | GCT-A8 light chain variable               | 213.7  | 204.4  | 0.96 | 205.8  | 0.96 | 130.5  | 0.61 | 173.9  | 0.81 | 187    | 0.88 | 207.6  | 0.97 | 189.8  | 0.89 |
| P56537     | Eukaryotic translation initiation         | 805.9  | 954.1  | 1.18 | 753.4  | 0.93 | 767.9  | 0.95 | 848.3  | 1.05 | 864    | 1.07 | 941.5  | 1.17 | 893.8  | 1.11 |
| B2R5M3     | cDNA, FLJ92530, highly similar to         | 2743.8 | 2417.7 | 0.88 | 1964.8 | 0.72 | 2140.9 | 0.78 | 2074.8 | 0.76 | 2335   | 0.85 | 2773.4 | 1.01 | 2251.9 | 0.82 |
| B7Z1F8     | cDNA FLJ53025, highly similar to          |        |        |      |        |      |        |      |        |      |        |      |        |      |        |      |
| P08123     | Collagen alpha-2(I) chain OS=Homo sapiens | 599.1  | 706.4  | 1.18 | 689.9  | 1.15 | 526.5  | 0.88 | 683.7  | 1.14 | 683.1  | 1.14 | 830.1  | 1.39 | 687.6  | 1.15 |
| P11047     | Laminin subunit gamma-1 C                 | 796.9  | 780.4  | 0.98 | 625.4  | 0.78 | 808.8  | 1.01 | 698.5  | 0.88 | 754    | 0.95 | 736.5  | 0.92 | 647.9  | 0.81 |
| A0A024RC1  | Discoidin domain receptor family          | 805.3  | 890.6  | 1.11 | 650    | 0.81 | 705.5  | 0.88 | 781.8  | 0.97 | 851    | 1.06 | 882.7  | 1.10 | 712.9  | 0.89 |
| P14780     | Matrix metalloproteinase-9                | 1798   | 2452.9 | 1.36 | 1530.3 | 0.85 | 1080.4 | 0.60 | 1809.8 | 1.01 | 1992.7 | 1.11 | 2260.4 | 1.26 | 2177.8 | 1.21 |
| Q8NCC3     | Group XV phospholipase A2                 | 1266.8 | 1659.2 | 1.31 | 1849.4 | 1.46 | 1093.8 | 0.86 | 1593.5 | 1.26 | 1799.2 | 1.42 | 1720.4 | 1.36 | 1399.9 | 1.11 |
| B3KNB4     | cDNA FLJ14168 fis, clone                  | 102.1  | 141.7  | 1.39 | 103    | 1.01 | 143.4  | 1.40 | 120    | 1.18 | 108.6  | 1.06 | 137.7  | 1.35 | 103.4  | 1.01 |
| A0A087WT1  | Transthyretin OS=Homo sapiens             | 1353.3 | 1516.3 | 1.12 | 1328   | 0.98 | 1449.7 | 1.07 | 1274.6 | 0.94 | 1364.1 | 1.01 | 1482   | 1.10 | 1330   | 0.98 |
| P19827     | Inter-alpha-trypsin inhibitor             | 440.1  | 613.5  | 1.39 | 471.8  | 1.07 | 573.4  | 1.30 | 494.3  | 1.12 | 480.6  | 1.09 | 616.8  | 1.40 | 506.3  | 1.15 |
| Q9UN37     | Vacuolar protein sorting-associated       | 2652.8 | 2674   | 1.01 | 2306.8 | 0.87 | 1958.7 | 0.74 | 2677.2 | 1.01 | 3099.7 | 1.17 | 2625.1 | 0.99 | 2040   | 0.77 |
| A0A0S2Z45  | Serpin peptidase inhibitor class          | 1294.4 | 1521.9 | 1.18 | 1022.6 | 0.79 | 1249.1 | 0.97 | 1268.9 | 0.98 | 1514.8 | 1.17 | 1478.5 | 1.14 | 1156.2 | 0.89 |
| P31997     | Carcinoembryonic antigen-related          | 2990.3 | 3511.7 | 1.17 | 3216.7 | 1.08 | 2157.7 | 0.72 | 3216.6 | 1.08 | 3211.6 | 1.07 | 2946.1 | 0.99 | 3237.4 | 1.08 |
| Q96JQ0     | Protocadherin-16 OS=Homo sapiens          | 663.9  | 699.5  | 1.05 | 615.2  | 0.93 | 638.2  | 0.96 | 665.4  | 1.00 | 699.8  | 1.05 | 691.7  | 1.04 | 572.8  | 0.86 |
| P18510     | Interleukin-1 receptor antagonist         | 254.6  | 246.8  | 0.97 | 266.9  | 1.05 | 212.5  | 0.83 | 317.9  | 1.25 | 259.6  | 1.02 | 259.3  | 1.02 | 311.8  | 1.22 |
| B3KUI5     | Hyaluronidase OS=Homo sapiens             | 584    | 879.3  | 1.51 | 465.3  | 0.80 | 570.1  | 0.98 | 764.9  | 1.31 | 705.2  | 1.21 | 691.5  | 1.18 | 570.8  | 0.98 |
| Q15375     | Ephrin type-A receptor 7 OS=Homo sapiens  | 865.6  | 1043.8 | 1.21 | 781.1  | 0.90 | 651.9  | 0.75 | 832.8  | 0.96 | 827.2  | 0.96 | 753.2  | 0.87 | 663    | 0.77 |
| O15230     | Laminin subunit alpha-5 OS=Homo sapiens   | 1128.4 | 1277.4 | 1.13 | 1384.1 | 1.23 | 1257   | 1.11 | 1455.4 | 1.29 | 1219.5 | 1.08 | 1256.7 | 1.11 | 1030.6 | 0.91 |

|          |                                                             |         |        |      |         |      |         |      |         |      |         |      |         |      |         |      |
|----------|-------------------------------------------------------------|---------|--------|------|---------|------|---------|------|---------|------|---------|------|---------|------|---------|------|
| Q9ULI3   | Protein HEG homolog 1 OS=Homo sapiens                       | 4254.6  | 3599.4 | 0.85 | 3451.9  | 0.81 | 2855.2  | 0.67 | 3841.9  | 0.90 | 3894.5  | 0.92 | 3781.3  | 0.89 | 3725.1  | 0.88 |
| A6NI73   | Leukocyte immunoglobulin-like receptor 4 OS=Homo sapiens    | 1420.6  | 1419.2 | 1.00 | 1255.4  | 0.88 | 1066.2  | 0.75 | 1303.5  | 0.92 | 1416.8  | 1.00 | 1362.8  | 0.96 | 1342.9  | 0.95 |
| Q9Y279   | V-set and immunoglobulin domain OS=Homo sapiens             | 1900.6  | 1502.7 | 0.79 | 1657.1  | 0.87 | 914.9   | 0.48 | 1971.7  | 1.04 | 1805.8  | 0.95 | 1450.6  | 0.76 | 1453.1  | 0.76 |
| S6BAQ4   | IgG H chain OS=Homo sapiens                                 |         |        |      |         |      |         |      |         |      |         |      |         |      |         |      |
| B2R4R0   | Histone H4 OS=Homo sapiens                                  | 1469.8  | 3267.7 | 2.22 | 2510.2  | 1.71 | 1327.3  | 0.90 | 1672.2  | 1.14 | 1782.4  | 1.21 | 3202.8  | 2.18 | 3831.6  | 2.61 |
| Q15485   | Ficolin-2 OS=Homo sapiens                                   | 2120.4  | 2249.4 | 1.06 | 1752.2  | 0.83 | 1371.5  | 0.65 | 1262.5  | 0.60 | 1880.5  | 0.89 | 2102.4  | 0.99 | 2340.7  | 1.10 |
| P00338   | L-lactate dehydrogenase A chain OS=Homo sapiens             | 637.4   | 828.7  | 1.30 | 888     | 1.39 | 543.8   | 0.85 | 861.6   | 1.35 | 945.2   | 1.48 | 993.3   | 1.56 | 924.8   | 1.45 |
| Q96S96   | Phosphatidylethanolamine-binding protein 1 OS=Homo sapiens  | 4021.4  | 5705.1 | 1.42 | 5915.8  | 1.47 | 2936.1  | 0.73 | 3959.4  | 0.98 | 4666.1  | 1.16 | 4031.1  | 1.00 | 3204.2  | 0.80 |
| K7EPJ4   | Cartilage intermediate layer protein 1 OS=Homo sapiens      | 1220.8  | 1309.1 | 1.07 | 1192.2  | 0.98 | 944.6   | 0.77 | 1219.8  | 1.00 | 1235.8  | 1.01 | 1188.1  | 0.97 | 1081.7  | 0.89 |
| Q7KYR7   | Butyrophilin subfamily 2 member 1 OS=Homo sapiens           | 6869.3  | 5880.3 | 0.86 | 4902.5  | 0.71 | 4426.9  | 0.64 | 5645.1  | 0.82 | 5865.5  | 0.85 | 5946.4  | 0.87 | 5279.6  | 0.77 |
| A0A087WX | Mucosal addressin cell adhesion molecule 1 OS=Homo sapiens  | 1956.5  | 1635   | 0.84 | 1422.1  | 0.73 | 1311.7  | 0.67 | 1740    | 0.89 | 1698.8  | 0.87 | 2030.6  | 1.04 | 1689.1  | 0.86 |
| A0A024RD | Lymphocyte cytosolic protein 1 OS=Homo sapiens              | 623.7   | 1083.2 | 1.74 | 784     | 1.26 | 516.2   | 0.83 | 823.9   | 1.32 | 836.9   | 1.34 | 886.5   | 1.42 | 1142.3  | 1.83 |
| A0A0A0N0 | CNTFR isoform 3 OS=Homo sapiens                             | 3175.4  | 3060.4 | 0.96 | 2938.5  | 0.93 | 2418.7  | 0.76 | 2809.6  | 0.88 | 2998.2  | 0.94 | 2725.8  | 0.86 | 2676.7  | 0.84 |
| B2R8I2   | cDNA, FLJ93914, highly similar to LOC100289253              | 932.5   | 1246   | 1.34 | 1141.8  | 1.22 | 840.1   | 0.90 | 1117.5  | 1.20 | 1001.6  | 1.07 | 1314.3  | 1.41 | 1197    | 1.28 |
| P29323   | Ephrin type-B receptor 2 OS=Homo sapiens                    | 252     | 229.4  | 0.91 | 239.8   | 0.95 | 184.5   | 0.73 | 236.1   | 0.94 | 243.8   | 0.97 | 239.6   | 0.95 | 195.7   | 0.78 |
| P68363   | Tubulin alpha-1B chain OS=Homo sapiens                      | 15.9    | 20.9   | 1.31 | 19      | 1.19 | 11.8    | 0.74 | 18.9    | 1.19 | 18.5    | 1.16 | 19.7    | 1.24 | 16.4    | 1.03 |
| A8K6K4   | cDNA FLJ77565, highly similar to LOC100289253               | 1392.7  | 1483.1 | 1.06 | 1504.4  | 1.08 | 1208.4  | 0.87 | 1401.7  | 1.01 | 1489    | 1.07 | 1408.5  | 1.01 | 1384.1  | 0.99 |
| P51688   | N-sulphoglucosamine sulphate 6S transferase OS=Homo sapiens | 582.5   | 917.1  | 1.57 | 561.5   | 0.96 | 525.9   | 0.90 | 676.5   | 1.16 | 662.6   | 1.14 | 827.3   | 1.42 | 624.4   | 1.07 |
| B7Z1K5   | Tubulin alpha chain OS=Homo sapiens                         | 325.4   | 465.8  | 1.43 | 406.6   | 1.25 | 342.3   | 1.05 | 353.2   | 1.09 | 397.9   | 1.22 | 385.2   | 1.18 | 328.3   | 1.01 |
| S6BAP4   | IgG H chain OS=Homo sapiens                                 | 14.6    | 26.2   | 1.79 | 36.7    | 2.51 | 23.2    | 1.59 | 53.7    | 3.68 | 20.7    | 1.42 | 13.6    | 0.93 | 19.7    | 1.35 |
| B4DPQ0   | Complement C1r subcomponent OS=Homo sapiens                 | 239.7   | 283.8  | 1.18 | 233.2   | 0.97 | 191.1   | 0.80 | 247.3   | 1.03 | 237.5   | 0.99 | 244.2   | 1.02 | 251.2   | 1.05 |
| B7ZKQ8   | PODXL protein OS=Homo sapiens                               | 3403.1  | 3202.6 | 0.94 | 2843.3  | 0.84 | 2466.7  | 0.72 | 3141.1  | 0.92 | 3425.7  | 1.01 | 3439.7  | 1.01 | 2693.7  | 0.79 |
| O75487   | Glypican-4 OS=Homo sapiens                                  | 581.4   | 606.7  | 1.04 | 544     | 0.94 | 536     | 0.92 | 593.3   | 1.02 | 617.9   | 1.06 | 615.2   | 1.06 | 507.1   | 0.87 |
| B2R701   | cDNA, FLJ93202, Homo sapiens                                | 30.3    | 25.1   | 0.83 | 30      | 0.99 | 20.1    | 0.66 | 25.4    | 0.84 | 24.7    | 0.82 | 23.6    | 0.78 | 23.4    | 0.77 |
| P52758   | Ribonuclease UK114 OS=Homo sapiens                          | 539.6   | 669.4  | 1.24 | 526.4   | 0.98 | 508     | 0.94 | 569.9   | 1.06 | 663.4   | 1.23 | 621.3   | 1.15 | 498.3   | 0.92 |
| G3XAK1   | Hepatocyte growth factor-like protein 1 OS=Homo sapiens     | 1427.9  | 1531.2 | 1.07 | 1406.8  | 0.99 | 1271    | 0.89 | 1426.6  | 1.00 | 1515.2  | 1.06 | 1369.1  | 0.96 | 1451.5  | 1.02 |
| V9HWC7   | Epididymis secretory sperm protein 1 OS=Homo sapiens        | 1373.1  | 1758.3 | 1.28 | 1425.6  | 1.04 | 1328.4  | 0.97 | 1458.9  | 1.06 | 1803.2  | 1.31 | 1594.8  | 1.16 | 1296.7  | 0.94 |
| Q9H665   | IGF-like family receptor 1 C OS=Homo sapiens                | 1955.6  | 1816.2 | 0.93 | 1642.3  | 0.84 | 1422.6  | 0.73 | 1945.8  | 0.99 | 1979.3  | 1.01 | 1855.6  | 0.95 | 1805.5  | 0.92 |
| A0A125U0 | MS-F1 heavy chain variable region OS=Homo sapiens           |         |        |      |         |      |         |      |         |      |         |      |         |      |         |      |
| B8ZWD9   | Diazepam binding inhibitor OS=Homo sapiens                  | 1884.1  | 1883   | 1.00 | 1852.7  | 0.98 | 1540.4  | 0.82 | 1782.7  | 0.95 | 1839.2  | 0.98 | 1173.8  | 0.62 | 1657.3  | 0.88 |
| P25940   | Collagen alpha-3(V) chain OS=Homo sapiens                   | 258.1   | 269    | 1.04 | 230.1   | 0.89 | 314.2   | 1.22 | 250.9   | 0.97 | 252.9   | 0.98 | 229.1   | 0.89 | 235.6   | 0.91 |
| O75942   | Major prion protein OS=Homo sapiens                         | 3584    | 3095   | 0.86 | 2786.1  | 0.78 | 2538    | 0.71 | 2956.3  | 0.82 | 3476.6  | 0.97 | 2890.9  | 0.81 | 2604.5  | 0.73 |
| P0DJJ8   | Pepsin A-3 OS=Homo sapiens                                  | 22700.4 | 19671  | 0.87 | 18981.8 | 0.84 | 15407.6 | 0.68 | 26908.4 | 1.19 | 24011.9 | 1.06 | 34342.5 | 1.51 | 19145.7 | 0.84 |
| Q07954   | Pro-low-density lipoprotein receptor OS=Homo sapiens        | 2483.3  | 2617.6 | 1.05 | 2206.5  | 0.89 | 1916.2  | 0.77 | 2396.9  | 0.97 | 2485.3  | 1.00 | 2467.2  | 0.99 | 2086.3  | 0.84 |
| O14745   | Na(+)/H(+) exchange regulator 1 OS=Homo sapiens             | 1481.2  | 1769.7 | 1.19 | 1223.1  | 0.83 | 1195.9  | 0.81 | 1283    | 0.87 | 1539.7  | 1.04 | 1621.2  | 1.09 | 1203    | 0.81 |
| A0A0A0MR | Immunoglobulin kappa variable region 1 OS=Homo sapiens      | 103.8   | 111.8  | 1.08 | 105.3   | 1.01 | 81.6    | 0.79 | 106.7   | 1.03 | 108.3   | 1.04 | 110.6   | 1.07 | 98.8    | 0.95 |
| A2NXP8   | Heavy chain variable region OS=Homo sapiens                 | 85.1    | 93.6   | 1.10 | 87.4    | 1.03 | 107.2   | 1.26 | 87.3    | 1.03 | 100.2   | 1.18 | 88.4    | 1.04 | 97.5    | 1.15 |
| P05546   | Heparin cofactor 2 OS=Homo sapiens                          | 886.9   | 964.9  | 1.09 | 883.6   | 1.00 | 856     | 0.97 | 944.4   | 1.06 | 953.3   | 1.07 | 1098.7  | 1.24 | 921.4   | 1.04 |
| P34896   | Serine hydroxymethyltransferase OS=Homo sapiens             | 382.3   | 549.9  | 1.44 | 402.2   | 1.05 | 369.5   | 0.97 | 396.3   | 1.04 | 505.3   | 1.32 | 520.1   | 1.36 | 398.3   | 1.04 |
| A0A024R0 | Guanine nucleotide binding protein gamma-1 OS=Homo sapiens  | 80.9    | 84.4   | 1.04 | 96.5    | 1.19 | 64.2    | 0.79 | 84.8    | 1.05 | 85.2    | 1.05 | 79.6    | 0.98 | 69.6    | 0.86 |
| A0A087WV | CD177 antigen OS=Homo sapiens                               | 2340.8  | 2384.2 | 1.02 | 2654.3  | 1.13 | 2125.4  | 0.91 | 2433.4  | 1.04 | 2768.1  | 1.18 | 2120.2  | 0.91 | 1900.9  | 0.81 |
| P30044   | Peroxiredoxin-5, mitochondrial OS=Homo sapiens              | 908.4   | 982.8  | 1.08 | 936.2   | 1.03 | 647.4   | 0.71 | 893.8   | 0.98 | 979     | 1.08 | 982.2   | 1.08 | 894.2   | 0.98 |
| P05362   | Intercellular adhesion molecule 1 OS=Homo sapiens           | 1699.8  | 1658.4 | 0.98 | 1661.3  | 0.98 | 1164.3  | 0.68 | 1576.1  | 0.93 | 1659.3  | 0.98 | 1764.4  | 1.04 | 1716.8  | 1.01 |
| B2R7S8   | cDNA, FLJ93586, highly similar to LOC100289253              | 426.3   | 448.1  | 1.05 | 353.8   | 0.83 | 398.5   | 0.93 | 382     | 0.90 | 440.4   | 1.03 | 426.9   | 1.00 | 424.1   | 0.99 |
| A8K5I6   | cDNA FLJ78643, highly similar to LOC100289253               | 1669.6  | 2198.4 | 1.32 | 1626.9  | 0.97 | 1167.8  | 0.70 | 1735.9  | 1.04 | 1692.7  | 1.01 | 1782.4  | 1.07 | 2625.8  | 1.57 |
| P48061   | Stromal cell-derived factor 1 OS=Homo sapiens               | 2541.3  | 2991.8 | 1.18 | 3366.1  | 1.32 | 2422.9  | 0.95 | 3085.8  | 1.21 | 3437.8  | 1.35 | 3411.9  | 1.34 | 3247.7  | 1.28 |
| Q6V0I7   | Protocadherin Fat 4 OS=Homo sapiens                         | 719.2   | 736.9  | 1.02 | 728.6   | 1.01 | 580.1   | 0.81 | 732.5   | 1.02 | 748.9   | 1.04 | 753.1   | 1.05 | 594     | 0.83 |
| Q5U000   | Cathepsin Z OS=Homo sapiens                                 | 3261.1  | 3462.5 | 1.06 | 4858.2  | 1.49 | 2648.4  | 0.81 | 3428.6  | 1.05 | 3545.8  | 1.09 | 3525.8  | 1.08 | 3138.2  | 0.96 |
| Q9BRK5   | 45 kDa calcium-binding protein OS=Homo sapiens              | 1047.6  | 1225.7 | 1.17 | 966.4   | 0.92 | 980.6   | 0.94 | 1020.7  | 0.97 | 1077.1  | 1.03 | 1197.8  | 1.14 | 955.2   | 0.91 |
| P55000   | Secreted Ly-6/uPAR-related protein OS=Homo sapiens          | 663.4   | 419.5  | 0.63 | 470.6   | 0.71 | 283.5   | 0.43 | 441.1   | 0.66 | 531.6   | 0.80 | 468.5   | 0.71 | 399.8   | 0.60 |
| P54753   | Ephrin type-B receptor 3 OS=Homo sapiens                    | 352.1   | 336    | 0.95 | 295.4   | 0.84 | 292.5   | 0.83 | 336.9   | 0.96 | 354.3   | 1.01 | 347.4   | 0.99 | 331.4   | 0.94 |
| H3BLU2   | Limbic system-associated membrane protein OS=Homo sapiens   | 686.6   | 599.9  | 0.87 | 604.2   | 0.88 | 601.9   | 0.88 | 570.2   | 0.83 | 628.9   | 0.92 | 554.6   | 0.81 | 551.7   | 0.80 |
| Q59FR8   | Galectin (Fragment) OS=Homo sapiens                         | 800.5   | 871.6  | 1.09 | 777.7   | 0.97 | 636.1   | 0.79 | 816.7   | 1.02 | 937.7   | 1.17 | 857.6   | 1.07 | 767.2   | 0.96 |
| P16152   | Carbonyl reductase [NADPH] OS=Homo sapiens                  | 385.5   | 462.6  | 1.20 | 440.1   | 1.14 | 335.6   | 0.87 | 405.9   | 1.05 | 465.1   | 1.21 | 431     | 1.12 | 341.6   | 0.89 |
| Q9UBX7   | Kallikrein-11 OS=Homo sapiens                               | 2722.4  | 2886.9 | 1.06 | 3948.2  | 1.45 | 2651.8  | 0.97 | 2340.6  | 0.86 | 3219.7  | 1.18 | 1809.4  | 0.66 | 1938.5  | 0.71 |
| A0A0C4DH | Immunoglobulin kappa variable region 1 OS=Homo sapiens      | 2826.7  | 2440.4 | 0.86 | 3158.5  | 1.12 | 1930.8  | 0.68 | 2450.8  | 0.87 | 2371.9  | 0.84 | 2725.7  | 0.96 | 3150.4  | 1.11 |
| A0A024R6 | Ceroid-lipofuscinosis neurodegeneration 1 OS=Homo sapiens   | 1477.6  | 1759.1 | 1.19 | 1227    | 0.83 | 1184.9  | 0.80 | 1466.2  | 0.99 | 1856.7  | 1.26 | 1724.2  | 1.17 | 1388.2  | 0.94 |
| P09237   | Matrilysin OS=Homo sapiens                                  | 1214.8  | 1379.4 | 1.14 | 1155.3  | 0.95 | 1118.1  | 0.92 | 1249.5  | 1.03 | 1364.3  | 1.12 | 1583.5  | 1.30 | 1306.9  | 1.08 |



|           |                                      |        |        |      |        |      |        |      |        |      |        |      |        |      |        |      |
|-----------|--------------------------------------|--------|--------|------|--------|------|--------|------|--------|------|--------|------|--------|------|--------|------|
| A0A1A7UP  | Galactosamine (N-acetyl)-6-          | 997.6  | 1416.8 | 1.42 | 735.3  | 0.74 | 965.6  | 0.97 | 1109.4 | 1.11 | 970.4  | 0.97 | 1418.9 | 1.42 | 1134.1 | 1.14 |
| Q16849    | Receptor-type tyrosine-prot          | 1455.7 | 1406.2 | 0.97 | 1093   | 0.75 | 1081.4 | 0.74 | 1228   | 0.84 | 1230.5 | 0.85 | 1692.9 | 1.16 | 1051.5 | 0.72 |
| A0A125U0U | MS-C1 heavy chain variable           | 1014   | 952    | 0.94 | 793.7  | 0.78 | 912.6  | 0.90 | 934.2  | 0.92 | 1014.9 | 1.00 | 876.2  | 0.86 | 991.6  | 0.98 |
| Q9HB40    | Retinoid-inducible serine ca         | 904.6  | 1368.6 | 1.51 | 929.5  | 1.03 | 855    | 0.95 | 1095.1 | 1.21 | 1193.1 | 1.32 | 1368.5 | 1.51 | 883.1  | 0.98 |
| A0A024R0C | Phospholipase D family, me           | 1692.7 | 2048.1 | 1.21 | 1356.2 | 0.80 | 1394.3 | 0.82 | 1730.1 | 1.02 | 1788.3 | 1.06 | 2098.2 | 1.24 | 1540   | 0.91 |
| A0A0A0MTI | Glucose-6-phosphate isome            | 945.3  | 1311.3 | 1.39 | 995.2  | 1.05 | 873.4  | 0.92 | 1108.3 | 1.17 | 1193.8 | 1.26 | 1075.8 | 1.14 | 975.4  | 1.03 |
| Q02747    | Guanylin OS=Homo sapiens             | 2797.1 | 2596.8 | 0.93 | 6099.4 | 2.18 | 2609   | 0.93 | 2855.8 | 1.02 | 3234.9 | 1.16 | 2920.1 | 1.04 | 2336.8 | 0.84 |
| A0A024R5N | Tumor necrosis factor recep          | 829.6  | 818.8  | 0.99 | 644.6  | 0.78 | 636.5  | 0.77 | 707.2  | 0.85 | 718.3  | 0.87 | 843.3  | 1.02 | 755    | 0.91 |
| A0A024R5F | UDP-GlcNAc:betaGal beta-             | 751    | 921.3  | 1.23 | 710    | 0.95 | 707.1  | 0.94 | 823.4  | 1.10 | 950.1  | 1.27 | 955.7  | 1.27 | 763.9  | 1.02 |
| P09564    | T-cell antigen CD7 OS=Homo           | 271.3  | 233.9  | 0.86 | 178.6  | 0.66 | 345.4  | 1.27 | 206    | 0.76 | 250.6  | 0.92 | 226.9  | 0.84 | 245.6  | 0.91 |
| E9PK25    | Cofilin-1 OS=Homo sapiens            | 2864.2 | 3775.1 | 1.32 | 2670.2 | 0.93 | 2332.4 | 0.81 | 3004.5 | 1.05 | 3519.9 | 1.23 | 3036.5 | 1.06 | 3144.5 | 1.10 |
| A0A087WV  | Receptor-type tyrosine-prot          | 682.1  | 767.1  | 1.12 | 538.4  | 0.79 | 734.8  | 1.08 | 649    | 0.95 | 717.5  | 1.05 | 641.8  | 0.94 | 594    | 0.87 |
| A4GW21    | Programmed cell death ligand         | 1066.1 | 1167.3 | 1.09 | 955.3  | 0.90 | 862    | 0.81 | 974.5  | 0.91 | 1115.6 | 1.05 | 1052.4 | 0.99 | 1021.5 | 0.96 |
| O75339    | Cartilage intermediate layer         | 1295.6 | 1246.8 | 0.96 | 1186.7 | 0.92 | 939.7  | 0.73 | 1242.8 | 0.96 | 1197.2 | 0.92 | 1059.7 | 0.82 | 1119.3 | 0.86 |
| A2JA19    | Anti-mucin1 light chain vari         | 138.6  | 163    | 1.18 | 168.3  | 1.21 | 124    | 0.89 | 141.4  | 1.02 | 147    | 1.06 | 144.1  | 1.04 | 136.8  | 0.99 |
| Q99497    | Protein deglycase DJ-1 OS=           | 1867.4 | 2063.6 | 1.11 | 1872.6 | 1.00 | 1541.6 | 0.83 | 1821.2 | 0.98 | 2230.1 | 1.19 | 1856.2 | 0.99 | 1771.2 | 0.95 |
| P18827    | Syndecan-1 OS=Homo sapiens           | 1571.3 | 1616.4 | 1.03 | 1237.2 | 0.79 | 1224.3 | 0.78 | 1457.9 | 0.93 | 1727.9 | 1.10 | 1534.3 | 0.98 | 1402.8 | 0.89 |
| Q9NPF0    | CD320 antigen OS=Homo sapiens        | 3112.6 | 2926.8 | 0.94 | 2570   | 0.83 | 1843.2 | 0.59 | 2671.6 | 0.86 | 3013.7 | 0.97 | 2917.4 | 0.94 | 2555.1 | 0.82 |
| P00915    | Carbonic anhydrase 1 OS=Homo sapiens | 816.3  | 1363.4 | 1.67 | 1485.8 | 1.82 | 623.1  | 0.76 | 738.5  | 0.90 | 1088.6 | 1.33 | 923.7  | 1.13 | 994.8  | 1.22 |
| P04155    | Trefoil factor 1 OS=Homo sapiens     | 2289.6 | 2198.7 | 0.96 | 2084.6 | 0.91 | 2264.9 | 0.99 | 2235.2 | 0.98 | 2342.5 | 1.02 | 3474.8 | 1.52 | 3091.6 | 1.35 |
| O95998    | Interleukin-18-binding prote         | 4387.8 | 4158.9 | 0.95 | 3175.2 | 0.72 | 3770.7 | 0.86 | 3832.7 | 0.87 | 3758.2 | 0.86 | 4524   | 1.03 | 4016.7 | 0.92 |
| Q99969    | Retinoic acid receptor respo         | 449.9  | 505.7  | 1.12 | 508.8  | 1.13 | 437.5  | 0.97 | 486.1  | 1.08 | 541.1  | 1.20 | 481.2  | 1.07 | 430.8  | 0.96 |
| E5RH16    | Platelet-derived growth fact         | 59.7   | 60.5   | 1.01 | 60.7   | 1.02 | 50.1   | 0.84 | 60.9   | 1.02 | 57.2   | 0.96 | 59.8   | 1.00 | 58.9   | 0.99 |
| P62879    | Guanine nucleotide-binding           | 1397.1 | 1616.4 | 1.16 | 1366.8 | 0.98 | 1145.1 | 0.82 | 1487.9 | 1.06 | 1739.7 | 1.25 | 1691.8 | 1.21 | 1196.3 | 0.86 |
| Q01469    | Fatty acid-binding protein, e        | 974.9  | 934.5  | 0.96 | 1062.7 | 1.09 | 1055.3 | 1.08 | 1016.3 | 1.04 | 918.7  | 0.94 | 1262.6 | 1.30 | 1265.8 | 1.30 |
| V9HWJ5    | Nicotinate-nucleotide pyrop          | 719.5  | 1006   | 1.40 | 939.3  | 1.31 | 811.6  | 1.13 | 825.3  | 1.15 | 849.6  | 1.18 | 779.3  | 1.08 | 745.4  | 1.04 |
| P23526    | Adenosylhomocysteinase O             | 875    | 1319.8 | 1.51 | 1072.6 | 1.23 | 802    | 0.92 | 993.8  | 1.14 | 1252   | 1.43 | 1151.6 | 1.32 | 866.3  | 0.99 |
| Q8TB96    | T-cell immunomodulatory p            | 386.3  | 442.7  | 1.15 | 408.2  | 1.06 | 358.1  | 0.93 | 417.6  | 1.08 | 417.3  | 1.08 | 414.8  | 1.07 | 370    | 0.96 |
| P11279    | Lysosome-associated memb             | 5517   | 5279.3 | 0.96 | 4792   | 0.87 | 3348.7 | 0.61 | 5389.9 | 0.98 | 5921.8 | 1.07 | 4877.7 | 0.88 | 5000.5 | 0.91 |
| D3YTC8    | Leukocyte-associated immu            |        |        |      |        |      |        |      |        |      |        |      |        |      |        |      |
| Q9BX67    | Junctional adhesion molecu           | 473.9  | 440.1  | 0.93 | 407.4  | 0.86 | 405.7  | 0.86 | 460.6  | 0.97 | 492.1  | 1.04 | 441.2  | 0.93 | 451.5  | 0.95 |
| A0A024RDJ | EGF-like-domain, multiple            | 518.3  | 541.6  | 1.04 | 467.8  | 0.90 | 478.3  | 0.92 | 493    | 0.95 | 484.3  | 0.93 | 490.5  | 0.95 | 492.3  | 0.95 |
| P19438    | Tumor necrosis factor recep          | 513.2  | 539.5  | 1.05 | 540.6  | 1.05 | 434.3  | 0.85 | 510.2  | 0.99 | 496.5  | 0.97 | 524.7  | 1.02 | 466.3  | 0.91 |
| Q8NHP8    | Putative phospholipase B-li          | 2249.8 | 2171.8 | 0.97 | 1924   | 0.86 | 1367.5 | 0.61 | 2235.3 | 0.99 | 2171.5 | 0.97 | 2546   | 1.13 | 2186.1 | 0.97 |
| P05023    | Sodium/potassium-transport           | 411.9  | 417.9  | 1.01 | 350.6  | 0.85 | 341.9  | 0.83 | 392.1  | 0.95 | 373    | 0.91 | 482.4  | 1.17 | 310.2  | 0.75 |
| P20160    | Azurocidin OS=Homo sapiens           | 611.6  | 960.4  | 1.57 | 888.2  | 1.45 | 623.3  | 1.02 | 761.4  | 1.24 | 742.3  | 1.21 | 1039.5 | 1.70 | 905.4  | 1.48 |
| B7Z5W1    | cDNA FLJ54854, highly sim            | 1842.3 | 1509.2 | 0.82 | 1737.6 | 0.94 | 1145.9 | 0.62 | 1702   | 0.92 | 1928   | 1.05 | 1726.8 | 0.94 | 1606.1 | 0.87 |
| A0A140VJX | Sulfurtransferase OS=Homo sapiens    | 403.3  | 549.9  | 1.36 | 448.9  | 1.11 | 369.6  | 0.92 | 470.2  | 1.17 | 472.9  | 1.17 | 576    | 1.43 | 509.9  | 1.26 |
| A0A120HGG | GCT-A10 heavy chain varia            | 1703.1 | 1922.5 | 1.13 | 1638.4 | 0.96 | 1808   | 1.06 | 2062.5 | 1.21 | 1959.5 | 1.15 | 1575.8 | 0.93 | 1823.5 | 1.07 |
| Q5M8T4    | Connective tissue growth fa          | 1247.4 | 1202.6 | 0.96 | 1235.1 | 0.99 | 850.1  | 0.68 | 1162.3 | 0.93 | 1233   | 0.99 | 1104.8 | 0.89 | 1088.2 | 0.87 |
| Q9BRT3    | Migration and invasion enh           | 1376.7 | 1383.7 | 1.01 | 1089.7 | 0.79 | 975.1  | 0.71 | 1201.4 | 0.87 | 1505.4 | 1.09 | 1386.6 | 1.01 | 1229.2 | 0.89 |
| P49788    | Retinoic acid receptor respo         | 965.3  | 899.5  | 0.93 | 705    | 0.73 | 816.9  | 0.85 | 719.7  | 0.75 | 1750.1 | 1.81 | 767.3  | 0.79 | 819.1  | 0.85 |
| P31025    | Lipocalin-1 OS=Homo sapiens          | 1461.4 | 1277.4 | 0.87 | 1986   | 1.36 | 1010.4 | 0.69 | 1643.2 | 1.12 | 1591   | 1.09 | 1342.4 | 0.92 | 1319   | 0.90 |
| A0A075B6F | Protein IGKV3-7 (Fragment            | 489.9  | 409.2  | 0.84 | 411.4  | 0.84 | 299.4  | 0.61 | 370.9  | 0.76 | 404    | 0.82 | 428.4  | 0.87 | 433.5  | 0.88 |
| Q9BZG9    | Ly-6/neurotoxin-like protei          | 8447.9 | 7236.8 | 0.86 | 6557.9 | 0.78 | 4311.3 | 0.51 | 6534.3 | 0.77 | 7253.8 | 0.86 | 6545.8 | 0.77 | 5953.8 | 0.70 |
| A2VCQ3    | ROR1 protein (Fragment) O            | 951.7  | 890.4  | 0.94 | 802.8  | 0.84 | 658.5  | 0.69 | 911.6  | 0.96 | 893.9  | 0.94 | 1004.3 | 1.06 | 840.5  | 0.88 |
| P36957    | Dihydrolipoyllysine-residue          | 5668.5 | 5434.4 | 0.96 | 4096   | 0.72 | 3714.7 | 0.66 | 4739.8 | 0.84 | 5642   | 1.00 | 5392.6 | 0.95 | 4462.1 | 0.79 |
| A0A1C9J6T | B cell receptor heavy chain          |        |        |      |        |      |        |      |        |      |        |      |        |      |        |      |
| A0A024R1A | Testicular secretory protein         | 133.1  | 235.7  | 1.77 | 162.6  | 1.22 | 154.9  | 1.16 | 138    | 1.04 | 175.3  | 1.32 | 166    | 1.25 | 144.1  | 1.08 |
| Q5JWF2    | Guanine nucleotide-binding           | 907.3  | 945.2  | 1.04 | 776.6  | 0.86 | 641.8  | 0.71 | 896    | 0.99 | 1042.8 | 1.15 | 887.2  | 0.98 | 665.8  | 0.73 |
| A0A0G2JMJ | Cadherin-related family mem          | 249    | 287.3  | 1.15 | 188.5  | 0.76 | 181.9  | 0.73 | 193.4  | 0.78 | 244.6  | 0.98 | 218.6  | 0.88 | 205    | 0.82 |
| P13473    | Lysosome-associated memb             | 8958.6 | 7456.8 | 0.83 | 5745.4 | 0.64 | 4694   | 0.52 | 8648.5 | 0.97 | 8424.4 | 0.94 | 8179.5 | 0.91 | 8798.8 | 0.98 |
| A0A024R93 | Proteoglycan 4, isoform CR           | 5168.8 | 5246.9 | 1.02 | 6325.3 | 1.22 | 3913.3 | 0.76 | 5340.3 | 1.03 | 5389.9 | 1.04 | 4946.1 | 0.96 | 4970.3 | 0.96 |
| P12821    | Angiotensin-converting enz           | 747.9  | 740.1  | 0.99 | 581.7  | 0.78 | 632.1  | 0.85 | 680.9  | 0.91 | 787.1  | 1.05 | 598.5  | 0.80 | 535.7  | 0.72 |
| B7Z4R8    | cDNA FLJ53364, highly sim            | 47.5   | 41.2   | 0.87 | 45.6   | 0.96 | 32.5   | 0.68 | 41.7   | 0.88 | 43     | 0.91 | 39.1   | 0.82 | 46.8   | 0.99 |
| A0A024R99 | Copine III, isoform CRA_a            | 638.9  | 691.8  | 1.08 | 541.4  | 0.85 | 644.4  | 1.01 | 631.9  | 0.99 | 758.2  | 1.19 | 614.3  | 0.96 | 679.3  | 1.06 |
| Q5U0I6    | H.sapiens ras-related Hrab1          | 545.7  | 686.2  | 1.26 | 503.6  | 0.92 | 422.1  | 0.77 | 533.1  | 0.98 | 639.4  | 1.17 | 578.7  | 1.06 | 473.3  | 0.87 |
| A0A068LL6 | Ig heavy chain variable regi         | 689.2  | 743.5  | 1.08 | 507.5  | 0.74 | 616.8  | 0.89 | 684.1  | 0.99 | 647.7  | 0.94 | 614.2  | 0.89 | 812.6  | 1.18 |

|           |                                |        |        |      |        |      |        |      |        |      |        |      |        |      |        |      |
|-----------|--------------------------------|--------|--------|------|--------|------|--------|------|--------|------|--------|------|--------|------|--------|------|
| A0A024R84 | RAB14, member RAS onc          | 825.9  | 917.1  | 1.11 | 801.1  | 0.97 | 655.2  | 0.79 | 803.2  | 0.97 | 925.2  | 1.12 | 778.1  | 0.94 | 659.6  | 0.80 |
| P12814    | Alpha-actinin-1 OS=Homo        |        |        |      |        |      |        |      |        |      |        |      |        |      |        |      |
| Q14393    | Growth arrest-specific prote   | 343.2  | 327.5  | 0.95 | 255.8  | 0.75 | 262.6  | 0.77 | 325.5  | 0.95 | 352.3  | 1.03 | 338    | 0.98 | 295.3  | 0.86 |
| P05413    | Fatty acid-binding protein, h  | 1140.6 | 1274.9 | 1.12 | 1111.2 | 0.97 | 1041.8 | 0.91 | 1062.1 | 0.93 | 1301.3 | 1.14 | 1110.2 | 0.97 | 1069.6 | 0.94 |
| A0A140VJT | Testicular tissue protein Li   | 1298.5 | 400.6  | 1.34 | 273.3  | 0.92 | 353.4  | 1.18 | 316.9  | 1.06 | 365.3  | 1.22 | 342.3  | 1.15 | 300.4  | 1.01 |
| A0A0C4DH  | Immunoglobulin kappa vari      | 606.6  | 715.6  | 1.18 | 871    | 1.44 | 621.8  | 1.03 | 757.6  | 1.25 | 637.5  | 1.05 | 602.2  | 0.99 | 673.1  | 1.11 |
| Q09666    | Neuroblast differentiation-a   | 587.5  | 663.1  | 1.13 | 632.7  | 1.08 | 568.9  | 0.97 | 614.5  | 1.05 | 578.4  | 0.98 | 594.6  | 1.01 | 610.6  | 1.04 |
| P14550    | Alcohol dehydrogenase [NA      | 354    | 410.8  | 1.16 | 336.3  | 0.95 | 313.8  | 0.89 | 345.3  | 0.98 | 456.9  | 1.29 | 424.2  | 1.20 | 442.7  | 1.25 |
| Q16832    | Discoidin domain-containin     | 411.7  | 459.6  | 1.12 | 366.7  | 0.89 | 357.2  | 0.87 | 390.8  | 0.95 | 492.4  | 1.20 | 440.7  | 1.07 | 357.1  | 0.87 |
| P16284    | Platelet endothelial cell adhe |        |        |      |        |      |        |      |        |      |        |      |        |      |        |      |
| Q9HC84    | Mucin-5B OS=Homo sapien        | 821.2  | 643.3  | 0.78 | 529.5  | 0.64 | 669.4  | 0.82 | 613.9  | 0.75 | 811.7  | 0.99 | 567.5  | 0.69 | 538.9  | 0.66 |
| Q92859    | Neogenin OS=Homo sapien        | 797.5  | 786.5  | 0.99 | 701.2  | 0.88 | 594.3  | 0.75 | 757.9  | 0.95 | 790.5  | 0.99 | 746.3  | 0.94 | 683.4  | 0.86 |
| Q7Z738    | PCDH12 protein OS=Homo         | 177.3  | 207.9  | 1.17 | 150    | 0.85 | 237.3  | 1.34 | 168.5  | 0.95 | 164.1  | 0.93 | 183.6  | 1.04 | 157.8  | 0.89 |
| Q05CP7    | FABP1 protein (Fragment) (     | 1692.4 | 2216   | 1.31 | 1837.7 | 1.09 | 1758   | 1.04 | 1669.3 | 0.99 | 2070.9 | 1.22 | 1954.2 | 1.15 | 1419.3 | 0.84 |
| HOY3Z8    | Uncharacterized protein (Fr    | 789    | 733.1  | 0.93 | 563.1  | 0.71 | 587    | 0.74 | 656.7  | 0.83 | 701.9  | 0.89 | 724.7  | 0.92 | 661    | 0.84 |
| A0A024RAJ | Glutaredoxin (Thioltransfer    | 717.9  | 764.1  | 1.06 | 984.8  | 1.37 | 498.7  | 0.69 | 703.7  | 0.98 | 803.2  | 1.12 | 812.2  | 1.13 | 651.2  | 0.91 |
| Q99988    | Growth/differentiation facto   | 1308.6 | 1396.2 | 1.07 | 1660.6 | 1.27 | 867.2  | 0.66 | 1524.9 | 1.17 | 1300.5 | 0.99 | 1446.9 | 1.11 | 1648.4 | 1.26 |
| A0A087WW  | Immunoglobulin kappa vari      | 286.9  | 333.2  | 1.16 | 383    | 1.33 | 336.3  | 1.17 | 385    | 1.34 | 318.4  | 1.11 | 302.9  | 1.06 | 297.2  | 1.04 |
| Q14315    | Filamin-C OS=Homo sapien       | 464.2  | 545.7  | 1.18 | 449    | 0.97 | 372.6  | 0.80 | 492.7  | 1.06 | 499.1  | 1.08 | 492.8  | 1.06 | 391.6  | 0.84 |
| A0A0X9V9  | MS-F1 light chain variable r   | 1807.9 | 1476.4 | 0.82 | 1846.8 | 1.02 | 1351   | 0.75 | 1398.8 | 0.77 | 1486.8 | 0.82 | 2127.1 | 1.18 | 1949   | 1.08 |
| A0A125U0V | GCT-A1 heavy chain variab      | 105.3  | 106.2  | 1.01 | 88.3   | 0.84 | 83.2   | 0.79 | 106.5  | 1.01 | 105.8  | 1.00 | 164.3  | 1.56 | 97.5   | 0.93 |
| Q9BVM4    | Gamma-glutamylaminecycl        | 675.7  | 840.9  | 1.24 | 684.9  | 1.01 | 543    | 0.80 | 658.2  | 0.97 | 753.6  | 1.12 | 840    | 1.24 | 641.6  | 0.95 |
| Q5IJ48    | Protein crumbs homolog 2 C     | 157.7  | 177    | 1.12 | 176.9  | 1.12 | 129.6  | 0.82 | 146.6  | 0.93 | 163    | 1.03 | 191.6  | 1.21 | 151.1  | 0.96 |
| Q14247    | Src substrate cortactin OS=    | 1133.4 | 1053.6 | 0.93 | 1066.9 | 0.94 | 675.4  | 0.60 | 1153.7 | 1.02 | 1152   | 1.02 | 1409   | 1.24 | 985.8  | 0.87 |
| A0A075B73 | Platelet endothelial cell adhe | 1259   | 1254.7 | 1.00 | 1009.5 | 0.80 | 957.3  | 0.76 | 1165.9 | 0.93 | 1238.1 | 0.98 | 1242.9 | 0.99 | 1141.4 | 0.91 |
| P13671    | Complement component C6        | 601.5  | 671.3  | 1.12 | 485.9  | 0.81 | 566    | 0.94 | 606.5  | 1.01 | 682.6  | 1.13 | 704.2  | 1.17 | 721.3  | 1.20 |
| A0A024R32 | Filamin B, beta (Actin bindi   | 491.2  | 528.1  | 1.08 | 466.7  | 0.95 | 436.8  | 0.89 | 526.7  | 1.07 | 484.2  | 0.99 | 578.2  | 1.18 | 464    | 0.94 |
| Q0IIN1    | Keratin 77 OS=Homo sapien      |        |        |      |        |      |        |      |        |      |        |      |        |      |        |      |
| B2R6X2    | Beta-glucuronidase OS=Hoi      | 770.1  | 799.7  | 1.04 | 637.9  | 0.83 | 550.7  | 0.72 | 661.5  | 0.86 | 939    | 1.22 | 651.2  | 0.85 | 616.5  | 0.80 |
| P05556    | Integrin beta-1 OS=Homo s      | 1556.3 | 1658.1 | 1.07 | 1430.4 | 0.92 | 1255   | 0.81 | 1600.5 | 1.03 | 1658   | 1.07 | 1609   | 1.03 | 1466.7 | 0.94 |
| P55017    | Solute carrier family 12 mer   | 580.6  | 602.3  | 1.04 | 476.9  | 0.82 | 399.7  | 0.69 | 580    | 1.00 | 657.4  | 1.13 | 615    | 1.06 | 457.6  | 0.79 |
| P02461    | Collagen alpha-1(III) chain    | 1488.3 | 1504.5 | 1.01 | 1365.4 | 0.92 | 890.7  | 0.60 | 2066.9 | 1.39 | 1607.6 | 1.08 | 1983.7 | 1.33 | 2122.8 | 1.43 |
| A0A0S2Z2Z | Annexin (Fragment) OS=Hc       | 709.9  | 1041.6 | 1.47 | 728    | 1.03 | 683.4  | 0.96 | 838    | 1.18 | 870.3  | 1.23 | 895.2  | 1.26 | 700.5  | 0.99 |
| B1N7B6    | Cryocryoglobulin CCl1 he       | 1256.3 | 1379.4 | 1.10 | 1130.3 | 0.90 | 1393.4 | 1.11 | 1481.1 | 1.18 | 1286.5 | 1.02 | 1308.8 | 1.04 | 1399.1 | 1.11 |
| A2NJV5    | Kappa light chain variable r   | 127.9  | 86.5   | 0.68 | 132.6  | 1.04 | 79.8   | 0.62 | 100.4  | 0.78 | 118.7  | 0.93 | 129.3  | 1.01 | 135.3  | 1.06 |
| Q86Y38    | Xylosyltransferase 1 OS=Hc     | 547.6  | 508.5  | 0.93 | 548.5  | 1.00 | 434.3  | 0.79 | 608.2  | 1.11 | 512.6  | 0.94 | 666.5  | 1.22 | 465.9  | 0.85 |
| Q96AP7    | Endothelial cell-selective ad  | 1100.2 | 949.4  | 0.86 | 1030.7 | 0.94 | 771.5  | 0.70 | 983.9  | 0.89 | 1078.9 | 0.98 | 1073.7 | 0.98 | 948.1  | 0.86 |
| A0A024RDJ | G protein-coupled receptor     | 327.9  | 325.9  | 0.99 | 314.8  | 0.96 | 275.7  | 0.84 | 293.6  | 0.90 | 341.7  | 1.04 | 312    | 0.95 | 274    | 0.84 |
| Q16651    | Prostasin OS=Homo sapien       | 2330.8 | 1888.9 | 0.81 | 2031.5 | 0.87 | 1920.1 | 0.82 | 1707.8 | 0.73 | 2054.7 | 0.88 | 1905.5 | 0.82 | 1788.3 | 0.77 |
| P12429    | Annexin A3 OS=Homo sapi        | 120.9  | 175.6  | 1.45 | 148.9  | 1.23 | 160    | 1.32 | 183.5  | 1.52 | 145.8  | 1.21 | 149.1  | 1.23 | 138.5  | 1.15 |
| A8K0I8    | cDNA FLJ76207, highly sin      | 574    | 553.4  | 0.96 | 460.4  | 0.80 | 432.1  | 0.75 | 512.7  | 0.89 | 562    | 0.98 | 518.6  | 0.90 | 462.7  | 0.81 |
| P01766    | Immunoglobulin heavy vari      | 115.1  | 143.9  | 1.25 | 143.3  | 1.25 | 137.3  | 1.19 | 178.7  | 1.55 | 125.9  | 1.09 | 133.1  | 1.16 | 141.5  | 1.23 |
| O60888    | Protein CutA OS=Homo sap       | 922.3  | 802.2  | 0.87 | 671.5  | 0.73 | 646.8  | 0.70 | 717.4  | 0.78 | 852.5  | 0.92 | 839.7  | 0.91 | 722    | 0.78 |
| B2R657    | Annexin OS=Homo sapien         | 64.6   | 87.2   | 1.35 | 56     | 0.87 | 72.6   | 1.12 | 72     | 1.11 | 85.5   | 1.32 | 75.1   | 1.16 | 64.4   | 1.00 |
| Q6FIE5    | PHP14 protein OS=Homo s        | 1824.2 | 2307.3 | 1.26 | 1936.1 | 1.06 | 1452.8 | 0.80 | 2029.7 | 1.11 | 2186.5 | 1.20 | 1953.3 | 1.07 | 2081.4 | 1.14 |
| B2RAM2    | cDNA, FLJ94999, highly sin     | 670.9  | 772.1  | 1.15 | 718.3  | 1.07 | 675.4  | 1.01 | 724.5  | 1.08 | 780.6  | 1.16 | 623    | 0.93 | 528.4  | 0.79 |
| O00337    | Sodium/nucleoside cotransp     | 198.9  | 189    | 0.95 | 148.6  | 0.75 | 147.2  | 0.74 | 183.1  | 0.92 | 184    | 0.93 | 125.3  | 0.63 | 147.1  | 0.74 |
| A8K987    | cDNA FLJ77911, highly sin      | 3254.9 | 4857.3 | 1.49 | 3701   | 1.14 | 2361.3 | 0.73 | 3403.1 | 1.05 | 5215.5 | 1.60 | 3920.5 | 1.20 | 2928.1 | 0.90 |
| P08263    | Glutathione S-transferase A    | 331    | 515.5  | 1.56 | 439.4  | 1.33 | 348.2  | 1.05 | 386.9  | 1.17 | 470.7  | 1.42 | 586.6  | 1.77 | 350.8  | 1.06 |
| A0A024R52 | Dihydroxyacetone kinase 2      | 347.7  | 448.1  | 1.29 | 386.8  | 1.11 | 288.1  | 0.83 | 368.8  | 1.06 | 456.2  | 1.31 | 513    | 1.48 | 339.9  | 0.98 |
| P40189    | Interleukin-6 receptor subun   | 1487.4 | 1502.2 | 1.01 | 1535.8 | 1.03 | 1236.8 | 0.83 | 1489   | 1.00 | 1571.1 | 1.06 | 1537.7 | 1.03 | 1304.8 | 0.88 |
| Q5NV90    | V2-17 protein (Fragment) O     | 601.5  | 719.5  | 1.20 | 731.6  | 1.22 | 703    | 1.17 | 678.5  | 1.13 | 774.5  | 1.29 | 746.6  | 1.24 | 714.1  | 1.19 |
| P22528    | Cornifin-B OS=Homo sapien      | 2109   | 1716.5 | 0.81 | 2446.7 | 1.16 | 1832.6 | 0.87 | 2536.8 | 1.20 | 2307.6 | 1.09 | 1763.9 | 0.84 | 2761.7 | 1.31 |
| Q9UN70    | Protocadherin gamma-C3 O       | 2507.6 | 2723.8 | 1.09 | 2196.7 | 0.88 | 2021.5 | 0.81 | 2364.5 | 0.94 | 2665.5 | 1.06 | 2478.2 | 0.99 | 2172.8 | 0.87 |
| A8MTF8    | Protein FAM3B OS=Homo          | 692.4  | 701.2  | 1.01 | 620.2  | 0.90 | 492.3  | 0.71 | 644.8  | 0.93 | 757    | 1.09 | 662    | 0.96 | 621    | 0.90 |
| P20336    | Ras-related protein Rab-3A     | 264.4  | 288    | 1.09 | 323.8  | 1.22 | 274.1  | 1.04 | 270.9  | 1.02 | 263.1  | 1.00 | 213.9  | 0.81 | 203.9  | 0.77 |
| Q8WVQ1    | Soluble calcium-activated m    | 308.3  | 330.6  | 1.07 | 258.7  | 0.84 | 273.8  | 0.89 | 272.7  | 0.88 | 352.1  | 1.14 | 284    | 0.92 | 239.9  | 0.78 |
| B8PRF2    | CD160 antigen OS=Homo s        | 779.3  | 721.9  | 0.93 | 696    | 0.89 | 675.2  | 0.87 | 659.5  | 0.85 | 763.6  | 0.98 | 935.9  | 1.20 | 605    | 0.78 |



|           |                                |         |         |      |         |      |        |      |         |      |        |      |        |      |         |      |
|-----------|--------------------------------|---------|---------|------|---------|------|--------|------|---------|------|--------|------|--------|------|---------|------|
| A0A0A0MR  | Coagulation factor V OS=H      | 358.9   | 300.9   | 0.84 | 315.4   | 0.88 | 245    | 0.68 | 312     | 0.87 | 361.4  | 1.01 | 336.1  | 0.94 | 333.1   | 0.93 |
| Q7LBR1    | Charged multivesicular body    | 2977.5  | 2648.7  | 0.89 | 2505.2  | 0.84 | 2824   | 0.95 | 3025.5  | 1.02 | 3153.4 | 1.06 | 2759   | 0.93 | 2295.7  | 0.77 |
| P13797    | Plastin-3 OS=Homo sapiens      | 38.2    | 72.7    | 1.90 | 101.6   | 2.66 | 41.1   | 1.08 | 42.1    | 1.10 | 40.3   | 1.05 | 39.3   | 1.03 | 40.6    | 1.06 |
| Q53G35    | Phosphoglycerate mutase (F     | 231.3   | 281.4   | 1.22 | 242.1   | 1.05 | 226.4  | 0.98 | 255.6   | 1.11 | 219.9  | 0.95 | 238.6  | 1.03 | 228     | 0.99 |
| Q9NY97    | N-acetyllactosaminide beta-    | 721.8   | 919.2   | 1.27 | 824.8   | 1.14 | 809.8  | 1.12 | 820.4   | 1.14 | 864.8  | 1.20 | 836.3  | 1.16 | 737.5   | 1.02 |
| A0A024R1S | LIM and SH3 protein 1, iso     | 429.2   | 403.7   | 0.94 | 359.7   | 0.84 | 339.5  | 0.79 | 378.4   | 0.88 | 432.5  | 1.01 | 367.5  | 0.86 | 354.1   | 0.83 |
| Q9Y509    | VH3 protein (Fragment) OS      | 704.9   | 906.8   | 1.29 | 727.1   | 1.03 | 827.2  | 1.17 | 808.2   | 1.15 | 768.7  | 1.09 | 750.8  | 1.07 | 821.1   | 1.16 |
| G8JLH6    | Tetraspanin (Fragment) OS=     | 7477.1  | 6145.2  | 0.82 | 6435.4  | 0.86 | 5012.1 | 0.67 | 7231.1  | 0.97 | 8554.5 | 1.14 | 5538.3 | 0.74 | 4966.4  | 0.66 |
| Q9BTY2    | Plasma alpha-L-fucosidase (    | 625.1   | 746.3   | 1.19 | 610.9   | 0.98 | 619.2  | 0.99 | 687     | 1.10 | 796.3  | 1.27 | 708.6  | 1.13 | 715     | 1.14 |
| P22732    | Solute carrier family 2, facil | 1407.4  | 1530    | 1.09 | 1084.8  | 0.77 | 1228   | 0.87 | 1507.9  | 1.07 | 1666.2 | 1.18 | 1386.6 | 0.99 | 903.4   | 0.64 |
| P35443    | Thrombospondin-4 OS=Hoi        | 147.1   | 119.7   | 0.81 | 124.8   | 0.85 | 148.9  | 1.01 | 135.3   | 0.92 | 123.5  | 0.84 | 121.2  | 0.82 | 138.8   | 0.94 |
| A0A0A1HA  | H.sapiens ras-related Hrab3    |         |         |      |         |      |        |      |         |      |        |      |        |      |         |      |
| Q9UL84    | Myosin-reactive immunoglo      | 216.8   | 307.4   | 1.42 | 208     | 0.96 | 219    | 1.01 | 216.9   | 1.00 | 226.7  | 1.05 | 233    | 1.07 | 343.2   | 1.58 |
| Q9NQ36    | Signal peptide, CUB and EC     | 688.2   | 589     | 0.86 | 696.4   | 1.01 | 445.5  | 0.65 | 694     | 1.01 | 649.5  | 0.94 | 673.3  | 0.98 | 556.2   | 0.81 |
| A8K2Q6    | Peptidyl-prolyl cis-trans iso  | 712.3   | 821.1   | 1.15 | 599.6   | 0.84 | 531.2  | 0.75 | 791.4   | 1.11 | 838.2  | 1.18 | 931.8  | 1.31 | 658.8   | 0.92 |
| Q14894    | Ketimine reductase mu-crys     | 400.1   | 566.4   | 1.42 | 422.1   | 1.05 | 567.6  | 1.42 | 444.8   | 1.11 | 511.4  | 1.28 | 480.9  | 1.20 | 432.6   | 1.08 |
| Q9ULV1    | Frizzled-4 OS=Homo sapien      | 2293.8  | 2061.7  | 0.90 | 2021.7  | 0.88 | 1398.8 | 0.61 | 2209.9  | 0.96 | 2362.7 | 1.03 | 1983.4 | 0.86 | 1839.2  | 0.80 |
| Q9Y2S2    | Lambda-crystallin homolog      | 653.3   | 1726.9  | 2.64 | 870.9   | 1.33 | 639.3  | 0.98 | 725.1   | 1.11 | 893.1  | 1.37 | 1034.1 | 1.58 | 693     | 1.06 |
| Q6UX71    | Plexin domain-containing pr    | 879.6   | 1042.3  | 1.18 | 812.5   | 0.92 | 697.6  | 0.79 | 857.4   | 0.97 | 847.8  | 0.96 | 987.5  | 1.12 | 751.1   | 0.85 |
| P04066    | Tissue alpha-L-fucosidase C    | 592.1   | 782     | 1.32 | 578.6   | 0.98 | 594.6  | 1.00 | 729.5   | 1.23 | 854.4  | 1.44 | 783.6  | 1.32 | 660.8   | 1.12 |
| Q9H6X2    | Anthrax toxin receptor 1 OS    | 962.8   | 915.6   | 0.95 | 1105.3  | 1.15 | 892.6  | 0.93 | 928.1   | 0.96 | 932.3  | 0.97 | 905.1  | 0.94 | 923.1   | 0.96 |
| P20138    | Myeloid cell surface antigen   | 880.8   | 975.8   | 1.11 | 822.3   | 0.93 | 754    | 0.86 | 875     | 0.99 | 806.8  | 0.92 | 915.9  | 1.04 | 748.2   | 0.85 |
| E7EQR8    | Protein YIPF3 OS=Homo sa       | 23740.1 | 21072.3 | 0.89 | 17617.5 | 0.74 | 18663  | 0.79 | 21307.5 | 0.90 | 22466  | 0.95 | 21160  | 0.89 | 20061.3 | 0.85 |
| A0A024REI | Prominin 2, isoform CRA_a      | 960.6   | 1009    | 1.05 | 945.6   | 0.98 | 802.3  | 0.84 | 1009.4  | 1.05 | 1102.6 | 1.15 | 1014.6 | 1.06 | 764.5   | 0.80 |
| P35321    | Cornifin-A OS=Homo sapie       | 378.6   | 339.1   | 0.90 | 372.9   | 0.98 | 500.2  | 1.32 | 379.1   | 1.00 | 361.8  | 0.96 | 330.9  | 0.87 | 437.9   | 1.16 |
| P36896    | Activin receptor type-1B OS    | 2014    | 1670    | 0.83 | 1388.4  | 0.69 | 1232.7 | 0.61 | 1677.5  | 0.83 | 1893.2 | 0.94 | 1729.5 | 0.86 | 1604.6  | 0.80 |
| Q9H444    | Charged multivesicular bod     | 418.7   | 478.7   | 1.14 | 411.2   | 0.98 | 382    | 0.91 | 419.4   | 1.00 | 476.3  | 1.14 | 460.7  | 1.10 | 348.4   | 0.83 |
| A6NMH8    | Tetraspanin OS=Homo sapi       | 183.4   | 203.9   | 1.11 | 202.5   | 1.10 | 155    | 0.85 | 194.5   | 1.06 | 184.8  | 1.01 | 193.4  | 1.05 | 159.1   | 0.87 |
| Q8WV92    | MIT domain-containing pro      | 314.4   | 385.2   | 1.23 | 284     | 0.90 | 348.4  | 1.11 | 363.2   | 1.16 | 398.2  | 1.27 | 463.8  | 1.48 | 295.9   | 0.94 |
| A8K4E0    | cDNA FLJ78122 OS=Homo          | 377.6   | 401.7   | 1.06 | 325.8   | 0.86 | 258.6  | 0.68 | 369.2   | 0.98 | 335.7  | 0.89 | 380.5  | 1.01 | 323.5   | 0.86 |
| A0A0X9T0I | GCT-A5 heavy chain variab      | 1288.3  | 1363.3  | 1.06 | 1109.9  | 0.86 | 1365   | 1.06 | 1454.9  | 1.13 | 1610.6 | 1.25 | 1234.6 | 0.96 | 1571.4  | 1.22 |
| Q8N7G1    | Purine nucleoside phosphor     | 121.9   | 184.8   | 1.52 | 121.1   | 0.99 | 132.2  | 1.08 | 134.9   | 1.11 | 177.7  | 1.46 | 163.1  | 1.34 | 132.4   | 1.09 |
| A8K8G3    | cDNA FLJ77237, highly sin      | 1058.4  | 1113.3  | 1.05 | 939     | 0.89 | 913.6  | 0.86 | 1008.8  | 0.95 | 1122.8 | 1.06 | 1067   | 1.01 | 898.4   | 0.85 |
| D6RAR4    | Hepatocyte growth factor ac    | 1403.6  | 1206.9  | 0.86 | 1120    | 0.80 | 1146   | 0.82 | 1360.3  | 0.97 | 1370   | 0.98 | 1166.7 | 0.83 | 1038.7  | 0.74 |
| Q9NP29    | Microfibrillar protein 2 (Fra  | 648.7   | 570.7   | 0.88 | 720.9   | 1.11 | 475.9  | 0.73 | 681.6   | 1.05 | 792.3  | 1.22 | 561.8  | 0.87 | 614.9   | 0.95 |
| B2R7D2    | cDNA, FLJ93389, highly sin     | 181.1   | 294.3   | 1.63 | 201.4   | 1.11 | 207    | 1.14 | 188.3   | 1.04 | 223    | 1.23 | 258.5  | 1.43 | 184.8   | 1.02 |
| Q8NC42    | E3 ubiquitin-protein ligase F  | 998.1   | 1022.1  | 1.02 | 916.9   | 0.92 | 837.9  | 0.84 | 985.8   | 0.99 | 942.7  | 0.94 | 1003.4 | 1.01 | 905     | 0.91 |
| P27105    | Erythrocyte band 7 integral    | 432     | 561.6   | 1.30 | 422.1   | 0.98 | 399.2  | 0.92 | 493.6   | 1.14 | 496.4  | 1.15 | 522.5  | 1.21 | 417.1   | 0.97 |
| P81172    | Hepcidin OS=Homo sapien        | 2320.3  | 2372.8  | 1.02 | 2930.4  | 1.26 | 1814.3 | 0.78 | 2823.5  | 1.22 | 2868.3 | 1.24 | 2697.5 | 1.16 | 2796.6  | 1.21 |
| Q9HBR0    | Putative sodium-coupled ne     | 203.3   | 217.9   | 1.07 | 174.9   | 0.86 | 171.3  | 0.84 | 211.2   | 1.04 | 219.9  | 1.08 | 230.7  | 1.13 | 158.7   | 0.78 |
| Q5VW32    | BRO1 domain-containing pr      | 680.8   | 605.9   | 0.89 | 544.8   | 0.80 | 530.8  | 0.78 | 617     | 0.91 | 739.6  | 1.09 | 672.3  | 0.99 | 546.9   | 0.80 |
| Q15286    | Ras-related protein Rab-35 (   |         |         |      |         |      |        |      |         |      |        |      |        |      |         |      |
| A0A075B6J | Immunoglobulin lambda var      | 1136.9  | 900.5   | 0.79 | 1060.4  | 0.93 | 755.2  | 0.66 | 1166.2  | 1.03 | 1020.6 | 0.90 | 1022   | 0.90 | 1031.3  | 0.91 |
| Q0ZCF6    | Immunglobulin heavy chain      |         |         |      |         |      |        |      |         |      |        |      |        |      |         |      |
| P10645    | Chromogranin-A OS=Homo         | 1150    | 1315.1  | 1.14 | 1390.3  | 1.21 | 847.6  | 0.74 | 1127.3  | 0.98 | 1153.3 | 1.00 | 1322.4 | 1.15 | 899.4   | 0.78 |
| A2IPI6    | HRV Fab 027-VL (Fragmer        | 288.1   | 275.8   | 0.96 | 326.1   | 1.13 | 265.7  | 0.92 | 311.2   | 1.08 | 295.8  | 1.03 | 329.5  | 1.14 | 338.2   | 1.17 |
| P01040    | Cystatin-A OS=Homo sapie       | 1303.1  | 1120.2  | 0.86 | 1185.4  | 0.91 | 1183.6 | 0.91 | 1327.6  | 1.02 | 1145   | 0.88 | 1292.5 | 0.99 | 1320.2  | 1.01 |
| Q14019    | Coactosin-like protein OS=     | 2695.4  | 3304    | 1.23 | 3709    | 1.38 | 2098.1 | 0.78 | 2691.4  | 1.00 | 3876.4 | 1.44 | 2990.7 | 1.11 | 2315.1  | 0.86 |
| B0YIW2    | Apolipoprotein C-III OS=H      | 535.4   | 689     | 1.29 | 823     | 1.54 | 543.1  | 1.01 | 534.9   | 1.00 | 585.2  | 1.09 | 744.4  | 1.39 | 578.8   | 1.08 |
| Q9UKU6    | Thyrotropin-releasing horm     | 353.4   | 567.4   | 1.61 | 457.8   | 1.30 | 343.5  | 0.97 | 411.3   | 1.16 | 412.6  | 1.17 | 399.1  | 1.13 | 332.2   | 0.94 |
| A0A158RFU | RAB7, member RAS oncog         | 305.3   | 376.1   | 1.23 | 256.4   | 0.84 | 293.9  | 0.96 | 314.5   | 1.03 | 335.4  | 1.10 | 336.9  | 1.10 | 291.1   | 0.95 |
| Q9GZM7    | Tubulointerstitial nephritis a | 355.7   | 416.6   | 1.17 | 336     | 0.94 | 312.1  | 0.88 | 391.7   | 1.10 | 357.4  | 1.00 | 343.1  | 0.96 | 346.4   | 0.97 |
| P55259    | Pancreatic secretory granule   | 152.2   | 152.2   | 1.00 | 187.9   | 1.23 | 136.9  | 0.90 | 168     | 1.10 | 162.6  | 1.07 | 120.5  | 0.79 | 134.8   | 0.89 |
| Q8N289    | cDNA FLJ33655 fis, clone       | 130.7   | 132.1   | 1.01 | 133.3   | 1.02 | 127.7  | 0.98 | 161     | 1.23 | 140.4  | 1.07 | 113.5  | 0.87 | 112.5   | 0.86 |
| Q8WW52    | Protein FAM151A OS=Hori        | 851.1   | 989.6   | 1.16 | 689     | 0.81 | 567    | 0.67 | 737.5   | 0.87 | 830.1  | 0.98 | 912.5  | 1.07 | 609.1   | 0.72 |
| A0A024R1U | RAB5C, member RAS onc          | 412.1   | 473.8   | 1.15 | 354.3   | 0.86 | 363.6  | 0.88 | 469.5   | 1.14 | 529.5  | 1.28 | 408.8  | 0.99 | 345.6   | 0.84 |
| A0A090KFV | HLA class I antigen OS=Ho      | 138.3   | 171.7   | 1.24 | 135.1   | 0.98 | 103.3  | 0.75 | 147.5   | 1.07 | 142.7  | 1.03 | 137.3  | 0.99 | 120.9   | 0.87 |
| P20062    | Transcobalamin-2 OS=Homi       | 241.5   | 313.5   | 1.30 | 235.1   | 0.97 | 220.3  | 0.91 | 266.1   | 1.10 | 274.3  | 1.14 | 299.1  | 1.24 | 246.5   | 1.02 |

|           |                                                                            |        |        |      |        |      |        |      |        |      |        |      |        |      |        |      |
|-----------|----------------------------------------------------------------------------|--------|--------|------|--------|------|--------|------|--------|------|--------|------|--------|------|--------|------|
| Q5IWS5    | Intellectin 1 OS=Homo sapiens                                              | 793.9  | 662.1  | 0.83 | 403    | 0.51 | 407.9  | 0.51 | 509.9  | 0.64 | 416.2  | 0.52 | 593.9  | 0.75 | 316.1  | 0.40 |
| P15121    | Aldose reductase OS=Homo sapiens                                           | 209.9  | 178.4  | 0.85 | 196.8  | 0.94 | 143.8  | 0.69 | 186    | 0.89 | 255.8  | 1.22 | 232.8  | 1.11 | 304.2  | 1.45 |
| O43692    | Peptidase inhibitor 15 OS=Homo sapiens                                     | 2345.7 | 2388.7 | 1.02 | 1711.9 | 0.73 | 1882.8 | 0.80 | 2695.6 | 1.15 | 2144.6 | 0.91 | 2346.3 | 1.00 | 2147.8 | 0.92 |
| O95460    | Matrilin-4 OS=Homo sapiens                                                 | 789.3  | 769.4  | 0.97 | 532.9  | 0.68 | 555    | 0.70 | 706.2  | 0.89 | 654.5  | 0.83 | 616.9  | 0.78 | 491.1  | 0.62 |
| B4E1U9    | cDNA FLJ54776, highly similar to                                           | 373.9  | 502.9  | 1.35 | 394.2  | 1.05 | 338.7  | 0.91 | 400.9  | 1.07 | 534.3  | 1.43 | 441.2  | 1.18 | 423.8  | 1.13 |
| V9HW62    | Lactoylglutathione lyase OS=Homo sapiens                                   | 1116.1 | 1304.7 | 1.17 | 1214.5 | 1.09 | 901.8  | 0.81 | 1117.3 | 1.00 | 1269.3 | 1.14 | 1140.9 | 1.02 | 975.5  | 0.87 |
| Q2UY09    | Collagen alpha-1(XXVIII) chain OS=Homo sapiens                             | 1588.2 | 1460.8 | 0.92 | 1358.3 | 0.86 | 988.9  | 0.62 | 1457.2 | 0.92 | 1426.5 | 0.90 | 1433.7 | 0.90 | 1260.7 | 0.79 |
| Q06481    | Amyloid-like protein 2 OS=Homo sapiens                                     | 659.8  | 922.6  | 1.40 | 901.1  | 1.37 | 712.4  | 1.08 | 887.7  | 1.35 | 820.9  | 1.24 | 885.7  | 1.34 | 697.6  | 1.06 |
| Q15746    | Myosin light chain kinase, smooth muscle type 2 OS=Homo sapiens            | 1162.6 | 1140.3 | 0.98 | 958.7  | 0.82 | 861.9  | 0.74 | 1077.8 | 0.93 | 1058.3 | 0.91 | 1254.5 | 1.08 | 1083.5 | 0.93 |
| P21399    | Cytoplasmic aconitate hydratase OS=Homo sapiens                            | 281.1  | 385.3  | 1.37 | 309.4  | 1.10 | 258.9  | 0.92 | 321.4  | 1.14 | 372.5  | 1.33 | 330    | 1.17 | 271.2  | 0.96 |
| P02792    | Ferritin light chain OS=Homo sapiens                                       | 100.4  | 159.7  | 1.59 | 121.1  | 1.21 | 113.5  | 1.13 | 119.3  | 1.19 | 109.9  | 1.09 | 109.6  | 1.09 | 129.7  | 1.29 |
| P04899    | Guanine nucleotide-binding protein (GTP-binding) OS=Homo sapiens           | 147.3  | 172.2  | 1.17 | 160.6  | 1.09 | 149.7  | 1.02 | 205    | 1.39 | 221.7  | 1.51 | 157.2  | 1.07 | 160.8  | 1.09 |
| V9HW91    | Epididymis secretory sperm protein OS=Homo sapiens                         | 65.2   | 119.5  | 1.83 | 65     | 1.00 | 66.2   | 1.02 | 66.4   | 1.02 | 86.5   | 1.33 | 90.5   | 1.39 | 57.3   | 0.88 |
| A8K037    | cDNA FLJ77641 OS=Homo sapiens                                              | 651.7  | 774.5  | 1.19 | 651.3  | 1.00 | 508.3  | 0.78 | 670.9  | 1.03 | 654.8  | 1.00 | 785    | 1.20 | 593.8  | 0.91 |
| A6NC48    | ADP-ribosyl cyclase/cyclic nucleotide phosphodiesterase OS=Homo sapiens    | 286.2  | 279    | 0.97 | 248.2  | 0.87 | 202.9  | 0.71 | 261.6  | 0.91 | 249.8  | 0.87 | 246.8  | 0.86 | 230.9  | 0.81 |
| Q53GE4    | Leucine rich repeat containing protein OS=Homo sapiens                     | 228.6  | 266.2  | 1.16 | 221.6  | 0.97 | 206.3  | 0.90 | 239.9  | 1.05 | 239    | 1.05 | 252.9  | 1.11 | 195.6  | 0.86 |
| B4DRY1    | cDNA FLJ54428, highly similar to                                           | 306    | 347.9  | 1.14 | 348.9  | 1.14 | 265.1  | 0.87 | 318.1  | 1.04 | 347.4  | 1.14 | 332.6  | 1.09 | 311.7  | 1.02 |
| P50053    | Ketohexokinase OS=Homo sapiens                                             | 379    | 505.3  | 1.33 | 381.4  | 1.01 | 294.5  | 0.78 | 366.7  | 0.97 | 496.3  | 1.31 | 422.9  | 1.12 | 352.5  | 0.93 |
| A0A024R7I | Solute carrier family 44, member 1 OS=Homo sapiens                         | 864.2  | 989.2  | 1.14 | 1000.2 | 1.16 | 753.4  | 0.87 | 1022.9 | 1.18 | 1044.3 | 1.21 | 840.7  | 0.97 | 773.4  | 0.89 |
| A0A024R8S | Protein disulfide-isomerase OS=Homo sapiens                                | 223.5  | 282.9  | 1.27 | 214.3  | 0.96 | 206.7  | 0.92 | 228.6  | 1.02 | 215.5  | 0.96 | 232.5  | 1.04 | 214    | 0.96 |
| K7N7A8    | Uncharacterized protein (Fructose-1,6-bisphosphate) OS=Homo sapiens        | 12.6   | 13.6   | 1.08 | 13.8   | 1.10 | 15.8   | 1.25 | 16.1   | 1.28 | 18.9   | 1.50 | 15.1   | 1.20 | 14.2   | 1.13 |
| A0A109PP8 | MS-C2 light chain variable region OS=Homo sapiens                          | 644.8  | 675    | 1.05 | 642.2  | 1.00 | 563    | 0.87 | 554.6  | 0.86 | 610.9  | 0.95 | 787.8  | 1.22 | 625.4  | 0.97 |
| A0A087WW  | Trypsin-1 OS=Homo sapiens                                                  | 683    | 934.1  | 1.37 | 517    | 0.76 | 804.9  | 1.18 | 753    | 1.10 | 588.5  | 0.86 | 698.1  | 1.02 | 612.1  | 0.90 |
| B7ZLM6    | X-prolyl aminopeptidase (Amino acid) OS=Homo sapiens                       | 399.9  | 475.6  | 1.19 | 392    | 0.98 | 298.2  | 0.75 | 425.1  | 1.06 | 434.6  | 1.09 | 393.2  | 0.98 | 281.5  | 0.70 |
| Q96DR8    | Mucin-like protein 1 OS=Homo sapiens                                       | 7477.2 | 7509.4 | 1.00 | 8039.1 | 1.08 | 6954.1 | 0.93 | 8901.6 | 1.19 | 8034.1 | 1.07 | 4241.8 | 0.57 | 5934.1 | 0.79 |
| P36639    | 7,8-dihydro-8-oxoguanine triphosphate OS=Homo sapiens                      | 46.1   | 46.7   | 1.01 | 35.7   | 0.77 | 27.4   | 0.59 | 37.7   | 0.82 | 45     | 0.98 | 45.8   | 0.99 | 39.6   | 0.86 |
| A9UFC0    | Caspase 14 OS=Homo sapiens                                                 | 272.4  | 215.4  | 0.79 | 233.5  | 0.86 | 178.4  | 0.65 | 257.8  | 0.95 | 218.9  | 0.80 | 253.9  | 0.93 | 274    | 1.01 |
| Q15952    | Aggrin (Fragment) OS=Homo sapiens                                          |        |        |      |        |      |        |      |        |      |        |      |        |      |        |      |
| V9HW48    | SH3 domain-binding glutathione S-transferase OS=Homo sapiens               | 56.2   | 89     | 1.58 | 114.7  | 2.04 | 92.2   | 1.64 | 70.4   | 1.25 | 60.5   | 1.08 | 68     | 1.21 | 75.6   | 1.35 |
| P02743    | Serum amyloid P-component OS=Homo sapiens                                  | 1124.2 | 912.8  | 0.81 | 727.3  | 0.65 | 697.9  | 0.62 | 704.4  | 0.63 | 811.7  | 0.72 | 880.2  | 0.78 | 977.9  | 0.87 |
| Q68D85    | Natural cytotoxicity triggering receptor 1 OS=Homo sapiens                 | 202.5  | 193.7  | 0.96 | 177    | 0.87 | 164.2  | 0.81 | 180.1  | 0.89 | 188.2  | 0.93 | 189.8  | 0.94 | 183.7  | 0.91 |
| D3DRR6    | Inter-alpha (Globulin) inhibitor 1 OS=Homo sapiens                         | 249.7  | 446.9  | 1.79 | 336    | 1.35 | 459.8  | 1.84 | 351.5  | 1.41 | 296.5  | 1.19 | 432.7  | 1.73 | 327.5  | 1.31 |
| Q59FG9    | Chondroitin sulfate proteoglycan core protein OS=Homo sapiens              | 517.4  | 499.4  | 0.97 | 334.5  | 0.65 | 388.2  | 0.75 | 461.9  | 0.89 | 497.8  | 0.96 | 485.2  | 0.94 | 436.1  | 0.84 |
| P48960    | CD97 antigen OS=Homo sapiens                                               | 338    | 338.7  | 1.00 | 308.5  | 0.91 | 258.8  | 0.77 | 295.4  | 0.87 | 365.7  | 1.08 | 418.6  | 1.24 | 266.7  | 0.79 |
| O43291    | Kunitz-type protease inhibitor OS=Homo sapiens                             | 935.7  | 788.1  | 0.84 | 788.7  | 0.84 | 558.5  | 0.60 | 759.9  | 0.81 | 858.5  | 0.92 | 751.6  | 0.80 | 781.3  | 0.83 |
| A8K2X4    | cDNA FLJ75401, highly similar to                                           | 236.8  | 254.2  | 1.07 | 221.6  | 0.94 | 278.7  | 1.18 | 245.1  | 1.04 | 246.7  | 1.04 | 241.7  | 1.02 | 214.8  | 0.91 |
| P21796    | Voltage-dependent anion-selective chloride channel protein OS=Homo sapiens | 204.8  | 291.5  | 1.42 | 253.3  | 1.24 | 237.4  | 1.16 | 276.9  | 1.35 | 231.4  | 1.13 | 286.4  | 1.40 | 266.2  | 1.30 |
| A0A140T8X | Lysosomal thioesterase PPT1 OS=Homo sapiens                                | 225.9  | 282.1  | 1.25 | 214.6  | 0.95 | 187.1  | 0.83 | 265.8  | 1.18 | 266.3  | 1.18 | 310.6  | 1.37 | 229.1  | 1.01 |
| B2R778    | cDNA, FLJ93317, highly similar to                                          | 323.7  | 338.4  | 1.05 | 255.6  | 0.79 | 273.4  | 0.84 | 265.3  | 0.82 | 293.1  | 0.91 | 386.7  | 1.19 | 219.8  | 0.68 |
| B3KW14    | cDNA FLJ43122 fis, clone HAD00101                                          | 120.9  | 186.2  | 1.54 | 141.6  | 1.17 | 156.4  | 1.29 | 150.5  | 1.24 | 144.1  | 1.19 | 154.9  | 1.28 | 137.6  | 1.14 |
| A0A140VK  | Aspartate aminotransferase OS=Homo sapiens                                 | 402.1  | 572.1  | 1.42 | 435.2  | 1.08 | 451.3  | 1.12 | 490.8  | 1.22 | 626.6  | 1.56 | 470.5  | 1.17 | 402    | 1.00 |
| O60635    | Tetraspanin-1 OS=Homo sapiens                                              | 121.1  | 181.3  | 1.50 | 116.9  | 0.97 | 104.5  | 0.86 | 126.7  | 1.05 | 132.7  | 1.10 | 135.5  | 1.12 | 103    | 0.85 |
| Q5T2L0    | V-set domain-containing T-cell surface protein OS=Homo sapiens             | 960.5  | 1386   | 1.44 | 624.6  | 0.65 | 758.7  | 0.79 | 844    | 0.88 | 832    | 0.87 | 907.4  | 0.94 | 811.8  | 0.85 |
| P24158    | Myeloblastin OS=Homo sapiens                                               | 289.9  | 615.9  | 2.12 | 413.6  | 1.43 | 295.9  | 1.02 | 368.9  | 1.27 | 390.2  | 1.35 | 623    | 2.15 | 677.4  | 2.34 |
| P68371    | Tubulin beta-4B chain OS=Homo sapiens                                      | 23.6   | 26.1   | 1.11 | 18.2   | 0.77 | 35.9   | 1.52 | 20.9   | 0.89 | 20.3   | 0.86 | 22.9   | 0.97 | 26.6   | 1.13 |
| A0A075B6I | Immunoglobulin lambda variable region OS=Homo sapiens                      | 2023.3 | 1770.1 | 0.87 | 2483   | 1.23 | 2168.7 | 1.07 | 2079.2 | 1.03 | 1873.2 | 0.93 | 3276.7 | 1.62 | 2795   | 1.38 |
| P53801    | Pituitary tumor-transforming protein OS=Homo sapiens                       | 688.6  | 719.7  | 1.05 | 593.6  | 0.86 | 498.6  | 0.72 | 672.6  | 0.98 | 683.5  | 0.99 | 692.9  | 1.01 | 584.8  | 0.85 |
| B2R907    | cDNA, FLJ94149, highly similar to                                          | 346.7  | 280.5  | 0.81 | 261.4  | 0.75 | 223.3  | 0.64 | 247.2  | 0.71 | 299.8  | 0.86 | 352.9  | 1.02 | 286.9  | 0.83 |
| A0A024R57 | EH domain-containing protein OS=Homo sapiens                               | 231    | 230.6  | 1.00 | 191.1  | 0.83 | 140    | 0.61 | 221    | 0.96 | 275.8  | 1.19 | 256.4  | 1.11 | 187.4  | 0.81 |
| Q99536    | Synaptic vesicle membrane protein OS=Homo sapiens                          | 130.3  | 147.4  | 1.13 | 135.9  | 1.04 | 133.5  | 1.02 | 135.5  | 1.04 | 144    | 1.11 | 146.5  | 1.12 | 129.6  | 0.99 |
| E7EUF1    | Ectonucleotide pyrophosphatase OS=Homo sapiens                             | 343.1  | 382.5  | 1.11 | 334.8  | 0.98 | 317.6  | 0.93 | 321.1  | 0.94 | 371.3  | 1.08 | 344.8  | 1.00 | 278.6  | 0.81 |
| P20933    | N(4)-(beta-N-acetylglucosaminyl)lysine OS=Homo sapiens                     | 404.3  | 461.4  | 1.14 | 372.8  | 0.92 | 418.8  | 1.04 | 441.1  | 1.09 | 415.2  | 1.03 | 405.2  | 1.00 | 402.6  | 1.00 |
| A0A0S2Z3N | Dopa decarboxylase isoform 1 OS=Homo sapiens                               | 494.9  | 623.3  | 1.26 | 493    | 1.00 | 418.8  | 0.85 | 507    | 1.02 | 614.7  | 1.24 | 582.5  | 1.18 | 496.5  | 1.00 |
| Q6UX15    | Layilin OS=Homo sapiens                                                    | 442.6  | 465.8  | 1.05 | 467.6  | 1.06 | 353    | 0.80 | 491.7  | 1.11 | 476.1  | 1.08 | 528    | 1.19 | 409.6  | 0.93 |
| B4DKN3    | cDNA FLJ50980 OS=Homo sapiens                                              | 210.3  | 248    | 1.18 | 225.7  | 1.07 | 183.8  | 0.87 | 210.3  | 1.00 | 240.4  | 1.14 | 248    | 1.18 | 204.9  | 0.97 |
| A0A0A0MT  | UPF0764 protein C16orf89 OS=Homo sapiens                                   | 879.9  | 947.7  | 1.08 | 795.9  | 0.90 | 793.3  | 0.90 | 743.5  | 0.84 | 1208.5 | 1.37 | 899    | 1.02 | 733.4  | 0.83 |
| Q66K79    | Carboxypeptidase Z OS=Homo sapiens                                         | 2103.6 | 2090.1 | 0.99 | 2060.2 | 0.98 | 1403.2 | 0.67 | 2560.9 | 1.22 | 2240.2 | 1.06 | 2475.9 | 1.18 | 2134.7 | 1.01 |
| B4DR52    | Histone H2B OS=Homo sapiens                                                | 992.5  | 1928   | 1.94 | 1482.9 | 1.49 | 826.5  | 0.83 | 1087.7 | 1.10 | 1195   | 1.20 | 1902.3 | 1.92 | 2601.2 | 2.62 |



|           |                               |        |        |      |        |      |        |      |        |      |        |      |        |      |        |      |
|-----------|-------------------------------|--------|--------|------|--------|------|--------|------|--------|------|--------|------|--------|------|--------|------|
| B3KQS9    | cDNA PSEC0141 fis, clone      | 773.7  | 918.8  | 1.19 | 688.6  | 0.89 | 633    | 0.82 | 750.2  | 0.97 | 900.2  | 1.16 | 788.1  | 1.02 | 835.3  | 1.08 |
| Q08257    | Quinone oxidoreductase OS     | 319.8  | 477.5  | 1.49 | 325.6  | 1.02 | 294.8  | 0.92 | 327    | 1.02 | 454.5  | 1.42 | 355.2  | 1.11 | 293.3  | 0.92 |
| Q59G10    | Aldehyde dehydrogenase 1      | 170.9  | 215.2  | 1.26 | 158.9  | 0.93 | 151.1  | 0.88 | 161    | 0.94 | 201.3  | 1.18 | 219.5  | 1.28 | 148.9  | 0.87 |
| B4DLV7    | Rab GDP dissociation inhib    | 472.6  | 621.6  | 1.32 | 512.2  | 1.08 | 420.2  | 0.89 | 524.1  | 1.11 | 562    | 1.19 | 568.7  | 1.20 | 475.1  | 1.01 |
| P30043    | Flavin reductase (NADPH)      | 143.4  | 203.2  | 1.42 | 171.6  | 1.20 | 166.2  | 1.16 | 173    | 1.21 | 162.3  | 1.13 | 185.4  | 1.29 | 150.6  | 1.05 |
| Q400G7    | B and T lymphocyte attenua    | 106.5  | 92.5   | 0.87 | 71     | 0.67 | 80.2   | 0.75 | 75.5   | 0.71 | 90.5   | 0.85 | 92.8   | 0.87 | 91.7   | 0.86 |
| Q9Y3B3    | Transmembrane emp24 don       | 446    | 430    | 0.96 | 442    | 0.99 | 374.7  | 0.84 | 411    | 0.92 | 450.4  | 1.01 | 400    | 0.90 | 435.7  | 0.98 |
| P59665    | Neutrophil defensin 1 OS=F    | 1746.8 | 2669.7 | 1.53 | 2632.3 | 1.51 | 1359.4 | 0.78 | 2256.9 | 1.29 | 2139   | 1.22 | 4014.5 | 2.30 | 4344.9 | 2.49 |
| A0A0R7FJH | Coagulation factor XII OS=    | 83.3   | 132    | 1.58 | 114.1  | 1.37 | 91.6   | 1.10 | 96.1   | 1.15 | 89.6   | 1.08 | 107.7  | 1.29 | 95.5   | 1.15 |
| B2RBC8    | cDNA, FLJ95444, highly sin    | 875.9  | 762.3  | 0.87 | 686.1  | 0.78 | 530.6  | 0.61 | 751.3  | 0.86 | 847.2  | 0.97 | 764.2  | 0.87 | 717    | 0.82 |
| P16035    | Metalloproteinase inhibitor   | 890.7  | 808.9  | 0.91 | 682    | 0.77 | 925.9  | 1.04 | 901.6  | 1.01 | 865.5  | 0.97 | 873.9  | 0.98 | 706.7  | 0.79 |
| P61204    | ADP-ribosylation factor 3 C   | 528.6  | 671.3  | 1.27 | 534.7  | 1.01 | 486.1  | 0.92 | 627.4  | 1.19 | 643.2  | 1.22 | 608.7  | 1.15 | 613.1  | 1.16 |
| A8K6C1    | cDNA FLJ76868, highly sin     | 461.4  | 508.1  | 1.10 | 509    | 1.10 | 420.8  | 0.91 | 490    | 1.06 | 501.5  | 1.09 | 492.2  | 1.07 | 482.6  | 1.05 |
| V9HWH9    | Protein S100 OS=Homo sap      | 1224.2 | 1275.4 | 1.04 | 1048.9 | 0.86 | 979.6  | 0.80 | 1149.1 | 0.94 | 1119   | 0.91 | 1259.7 | 1.03 | 1780.4 | 1.45 |
| A0A1B0RPF | Fibroblast growth factor rec  | 493.9  | 546.6  | 1.11 | 460.8  | 0.93 | 379.5  | 0.77 | 479.6  | 0.97 | 487.4  | 0.99 | 484.2  | 0.98 | 446.5  | 0.90 |
| O00182    | Galectin-9 OS=Homo sapie      | 878.9  | 1045.3 | 1.19 | 676.1  | 0.77 | 737.8  | 0.84 | 930.6  | 1.06 | 1037.1 | 1.18 | 1067.8 | 1.21 | 872.9  | 0.99 |
| B2R7S7    | cDNA, FLJ93585, highly sin    | 165.1  | 199.8  | 1.21 | 176    | 1.07 | 131.7  | 0.80 | 186.5  | 1.13 | 198.7  | 1.20 | 197.4  | 1.20 | 149.8  | 0.91 |
| Q9NZT1    | Calmodulin-like protein 5 O   | 169.4  | 150.4  | 0.89 | 119.4  | 0.70 | 135.3  | 0.80 | 141.9  | 0.84 | 147.2  | 0.87 | 146.9  | 0.87 | 187.8  | 1.11 |
| A0A0G2JPF | Leukocyte-associated immu     | 339.7  | 358.4  | 1.06 | 324.8  | 0.96 | 293.2  | 0.86 | 266.2  | 0.78 | 374.8  | 1.10 | 307.5  | 0.91 | 300.5  | 0.88 |
| P36871    | Phosphoglucomutase-1 OS=      | 380.9  | 459.6  | 1.21 | 364.2  | 0.96 | 431.6  | 1.13 | 387.2  | 1.02 | 432.3  | 1.13 | 432.8  | 1.14 | 369    | 0.97 |
| A2N7P4    | Immunoglobulin mu-chain I     |        |        |      |        |      |        |      |        |      |        |      |        |      |        |      |
| Q96SB0    | Anti-streptococcal/anti-myo   | 94.1   | 103.3  | 1.10 | 105.1  | 1.12 | 83.6   | 0.89 | 124.1  | 1.32 | 95.9   | 1.02 | 159.3  | 1.69 | 128.6  | 1.37 |
| A0A024R9N | EH-domain containing 4, isc   | 74.6   | 83.8   | 1.12 | 62.1   | 0.83 | 80.9   | 1.08 | 65.4   | 0.88 | 73.5   | 0.99 | 75.6   | 1.01 | 66.8   | 0.90 |
| X5DR95    | Semaphorin 5A isoform A (     | 177    | 163.8  | 0.93 | 133.1  | 0.75 | 125.9  | 0.71 | 174.9  | 0.99 | 182.3  | 1.03 | 167.5  | 0.95 | 128.8  | 0.73 |
| Q99816    | Tumor susceptibility gene 11  | 390.7  | 528.8  | 1.35 | 361.9  | 0.93 | 382.6  | 0.98 | 413.9  | 1.06 | 458.6  | 1.17 | 540.4  | 1.38 | 350.4  | 0.90 |
| P20333    | Tumor necrosis factor recep   | 706.7  | 737.1  | 1.04 | 596.5  | 0.84 | 516.7  | 0.73 | 657.8  | 0.93 | 571.3  | 0.81 | 1127.5 | 1.60 | 680.3  | 0.96 |
| Q5U043    | S-(hydroxymethyl)glutathio    | 183    | 298    | 1.63 | 217.4  | 1.19 | 185.4  | 1.01 | 220.4  | 1.20 | 254.7  | 1.39 | 214.3  | 1.17 | 197.9  | 1.08 |
| Q5JRA6    | Melanoma inhibitory activit   | 297.4  | 285    | 0.96 | 309.2  | 1.04 | 227.4  | 0.76 | 296.8  | 1.00 | 275.4  | 0.93 | 256.7  | 0.86 | 276.2  | 0.93 |
| I3L4C2    | Brain-specific angiogenesis   | 77.2   | 79.9   | 1.03 | 66.5   | 0.86 | 81.2   | 1.05 | 67.8   | 0.88 | 88.2   | 1.14 | 69.2   | 0.90 | 63.5   | 0.82 |
| Q9BRA2    | Thioredoxin domain-contair    | 785.9  | 875.4  | 1.11 | 691.2  | 0.88 | 566.4  | 0.72 | 824.8  | 1.05 | 928.7  | 1.18 | 889.1  | 1.13 | 769.6  | 0.98 |
| Q9UL89    | Myosin-reactive immunoglo     | 84.9   | 104.1  | 1.23 | 79.9   | 0.94 | 126.5  | 1.49 | 115.9  | 1.37 | 75.1   | 0.88 | 109.9  | 1.29 | 102.6  | 1.21 |
| A0A0A6YY  | Trefoil factor 3 OS=Homo s    | 4753.6 | 5290.9 | 1.11 | 6041.5 | 1.27 | 3228.5 | 0.68 | 5198.1 | 1.09 | 5099.7 | 1.07 | 4859.1 | 1.02 | 5565.3 | 1.17 |
| A8K556    | cDNA FLJ78217 OS=Homo         | 66.2   | 58.7   | 0.89 | 55.2   | 0.83 | 41.1   | 0.62 | 54.3   | 0.82 | 68.5   | 1.03 | 61.2   | 0.92 | 78.9   | 1.19 |
| P41181    | Aquaporin-2 OS=Homo sap       | 738.1  | 769.4  | 1.04 | 814.4  | 1.10 | 541.7  | 0.73 | 802.1  | 1.09 | 943.5  | 1.28 | 759    | 1.03 | 695.1  | 0.94 |
| A0A024R7N | Interferon, gamma-inducible   | 330.6  | 402.6  | 1.22 | 352.3  | 1.07 | 289    | 0.87 | 434.6  | 1.31 | 329    | 1.00 | 447.9  | 1.35 | 352.1  | 1.07 |
| Q13508    | Ecto-ADP-ribosyltransferas    | 3963.6 | 3432.9 | 0.87 | 3392.8 | 0.86 | 2121.5 | 0.54 | 3256.2 | 0.82 | 3934.9 | 0.99 | 3277   | 0.83 | 2456.4 | 0.62 |
| Q8N4F0    | BPI fold-containing family    | 1975   | 698.4  | 0.72 | 482    | 0.49 | 566.6  | 0.58 | 533.5  | 0.55 | 911.4  | 0.93 | 549    | 0.56 | 538.1  | 0.55 |
| A1L4F5    | Receptor tyrosine kinase-lik  | 539.3  | 674    | 1.25 | 486.7  | 0.90 | 482.7  | 0.90 | 589.5  | 1.09 | 542.8  | 1.01 | 616.9  | 1.14 | 539.6  | 1.00 |
| Q7Z5F5    | Liver-expressed antimicrobi   | 2352.3 | 2169.4 | 0.92 | 2019.6 | 0.86 | 1508.1 | 0.64 | 2123.8 | 0.90 | 2118.7 | 0.90 | 2721.5 | 1.16 | 2031.8 | 0.86 |
| Q6MZK8    | Putative uncharacterized prc  | 1055.5 | 855.3  | 0.81 | 753.2  | 0.71 | 602.8  | 0.57 | 824.9  | 0.78 | 1052.1 | 1.00 | 815.5  | 0.77 | 884.4  | 0.84 |
| A0A0G2JNI | Leukocyte immunoglobulin-     | 506.9  | 727.8  | 1.44 | 569.3  | 1.12 | 471.4  | 0.93 | 639.9  | 1.26 | 650.6  | 1.28 | 758.7  | 1.50 | 604.4  | 1.19 |
| Q9UK41    | Vacuolar protein sorting-ass  | 125.4  | 168.4  | 1.34 | 135.1  | 1.08 | 131.4  | 1.05 | 135.1  | 1.08 | 139.5  | 1.11 | 134.7  | 1.07 | 115.1  | 0.92 |
| B1AKK2    | Dimethylarginine dimethyla    | 237.8  | 361.4  | 1.52 | 224.5  | 0.94 | 236.1  | 0.99 | 227.3  | 0.96 | 316.5  | 1.33 | 262.5  | 1.10 | 254.1  | 1.07 |
| Q13201    | Multimerin-1 OS=Homo sap      | 3084.4 | 2564.2 | 0.83 | 2383.5 | 0.77 | 1835.3 | 0.60 | 2261.2 | 0.73 | 2741.7 | 0.89 | 3078.9 | 1.00 | 2514.8 | 0.82 |
| Q6PCB0    | von Willebrand factor A do    | 360.7  | 686.2  | 1.90 | 405.7  | 1.12 | 301.9  | 0.84 | 381.8  | 1.06 | 389    | 1.08 | 484.1  | 1.34 | 312.9  | 0.87 |
| Q15904    | V-type proton ATPase subu     | 385.4  | 417.9  | 1.08 | 529.1  | 1.37 | 297.8  | 0.77 | 374.5  | 0.97 | 464    | 1.20 | 308.2  | 0.80 | 356.3  | 0.92 |
| H0Y8X4    | 2'-deoxynucleoside 5'-phosp   | 281.2  | 414.4  | 1.47 | 324    | 1.15 | 305.7  | 1.09 | 351.5  | 1.25 | 377.2  | 1.34 | 305    | 1.08 | 272.2  | 0.97 |
| P07585    | Decorin OS=Homo sapiens       | 336.7  | 405    | 1.20 | 330.1  | 0.98 | 330.8  | 0.98 | 366    | 1.09 | 354.2  | 1.05 | 363.2  | 1.08 | 359.3  | 1.07 |
| B3KPR2    | cDNA FLJ32087 fis, clone      | 426.5  | 481.3  | 1.13 | 551    | 1.29 | 426.2  | 1.00 | 475.2  | 1.11 | 421.6  | 0.99 | 462.8  | 1.09 | 373    | 0.87 |
| Q03405    | Urokinase plasminogen acti    | 107.7  | 127.2  | 1.18 | 158.8  | 1.47 | 115.4  | 1.07 | 127.4  | 1.18 | 117    | 1.09 | 122    | 1.13 | 109.9  | 1.02 |
| Q32Q12    | Nucleoside diphosphate kin    | 380.3  | 543    | 1.43 | 451.4  | 1.19 | 400.9  | 1.05 | 497.6  | 1.31 | 535.8  | 1.41 | 501.1  | 1.32 | 491.2  | 1.29 |
| Q9ULC0    | Endomucin OS=Homo sapie       | 772.7  | 808    | 1.05 | 759.5  | 0.98 | 456.2  | 0.59 | 869.5  | 1.13 | 842.1  | 1.09 | 601.8  | 0.78 | 867.5  | 1.12 |
| O00322    | Uroplakin-1a OS=Homo sap      | 506.4  | 488.1  | 0.96 | 477.2  | 0.94 | 370.2  | 0.73 | 501.9  | 0.99 | 484.3  | 0.96 | 500.6  | 0.99 | 421.2  | 0.83 |
| P24593    | Insulin-like growth factor-bi | 422.2  | 542.3  | 1.28 | 491    | 1.16 | 409.2  | 0.97 | 491.8  | 1.16 | 463.7  | 1.10 | 516    | 1.22 | 480.8  | 1.14 |
| B1B0D4    | ADAMTS-like protein 2 OS      | 111.6  | 116.7  | 1.05 | 99.4   | 0.89 | 82.5   | 0.74 | 111.7  | 1.00 | 111.1  | 1.00 | 113    | 1.01 | 105.9  | 0.95 |
| Q13308    | Inactive tyrosine-protein kin | 238    | 280.4  | 1.18 | 218.1  | 0.92 | 203.3  | 0.85 | 250    | 1.05 | 240.6  | 1.01 | 192.5  | 0.81 | 222.6  | 0.94 |
| O43570    | Carbonic anhydrase 12 OS=     | 12.2   | 13.4   | 1.09 | 11.4   | 0.93 | 8.7    | 0.71 | 13.7   | 1.12 | 16.3   | 1.34 | 12.6   | 1.03 | 10.4   | 0.85 |
| A0A0X9UW  | IBM-A3 heavy chain variab     | 45     | 93.6   | 2.08 | 64.4   | 1.43 | 53     | 1.18 | 61     | 1.36 | 55.5   | 1.23 | 64.3   | 1.43 | 52     | 1.16 |

|            |                                                                                                     |         |        |      |        |      |        |      |        |      |        |      |        |      |        |      |
|------------|-----------------------------------------------------------------------------------------------------|---------|--------|------|--------|------|--------|------|--------|------|--------|------|--------|------|--------|------|
| Q9NQ38     | Serine protease inhibitor Ka                                                                        | 2121.7  | 1745.1 | 0.82 | 2618.2 | 1.23 | 1196.8 | 0.56 | 2027.1 | 0.96 | 2058.5 | 0.97 | 1807.5 | 0.85 | 1876.7 | 0.88 |
| Q9NY25     | C-type lectin domain family                                                                         | 366.3   | 351.3  | 0.96 | 284.6  | 0.78 | 275    | 0.75 | 294.5  | 0.80 | 332.6  | 0.91 | 334.2  | 0.91 | 329    | 0.90 |
| Q15223     | Nectin-1 OS=Homo sapiens                                                                            | 980.7   | 923.9  | 0.94 | 798    | 0.81 | 666.1  | 0.68 | 1008.6 | 1.03 | 951.5  | 0.97 | 945.8  | 0.96 | 900.1  | 0.92 |
| Q53RD9     | Fibulin-7 OS=Homo sapiens                                                                           | 722     | 669.2  | 0.93 | 772.3  | 1.07 | 512.5  | 0.71 | 663.2  | 0.92 | 655.9  | 0.91 | 708.5  | 0.98 | 603.7  | 0.84 |
| Q16706     | Alpha-mannosidase 2 OS=Homo sapiens                                                                 | 283.9   | 313.3  | 1.10 | 279.2  | 0.98 | 211.3  | 0.74 | 288.8  | 1.02 | 318.6  | 1.12 | 301.1  | 1.06 | 276    | 0.97 |
| P48551     | Interferon alpha/beta receptor OS=Homo sapiens                                                      | 1228.8  | 969.7  | 0.79 | 966.2  | 0.79 | 532.1  | 0.43 | 832.4  | 0.68 | 832.9  | 0.68 | 938.9  | 0.76 | 1155.2 | 0.94 |
| A0A068LKC1 | Ig heavy chain variable region OS=Homo sapiens                                                      | 241.8   | 223.1  | 0.92 | 168    | 0.69 | 183.1  | 0.76 | 214.1  | 0.89 | 275.5  | 1.14 | 194.4  | 0.80 | 225.9  | 0.93 |
| Q14314     | Fibroleukin OS=Homo sapiens                                                                         | 676.9   | 907    | 1.34 | 602.9  | 0.89 | 714.1  | 1.05 | 759    | 1.12 | 756.1  | 1.12 | 883.9  | 1.31 | 611.3  | 0.90 |
| P36405     | ADP-ribosylation factor-like protein OS=Homo sapiens                                                | 74.8    | 89.8   | 1.20 | 76.7   | 1.03 | 74.6   | 1.00 | 82.7   | 1.11 | 84.3   | 1.13 | 76.4   | 1.02 | 73.4   | 0.98 |
| O15240     | Neurosecretory protein VGF OS=Homo sapiens                                                          | 1220.8  | 1246.6 | 1.02 | 1077.7 | 0.88 | 1069.5 | 0.88 | 1201.3 | 0.98 | 1129.4 | 0.93 | 1204.7 | 0.99 | 944.5  | 0.77 |
| J3KS40     | Secreted and transmembrane protein OS=Homo sapiens                                                  | 105.4   | 105.1  | 1.00 | 109.4  | 1.04 | 88.8   | 0.84 | 105.4  | 1.00 | 121.7  | 1.15 | 113.9  | 1.08 | 86.2   | 0.82 |
| A0A024R611 | Delta-like 1 homolog (Drosophila) OS=Homo sapiens                                                   | 7066.9  | 5585.3 | 0.79 | 4701.3 | 0.67 | 3555.6 | 0.50 | 5313.7 | 0.75 | 5481.2 | 0.78 | 4643.6 | 0.66 | 4609.3 | 0.65 |
| Q05DB4     | HEBP2 protein (Fragment) OS=Homo sapiens                                                            | 131.4   | 166.8  | 1.27 | 129.9  | 0.99 | 121.3  | 0.92 | 133    | 1.01 | 147.9  | 1.13 | 146.2  | 1.11 | 137.4  | 1.05 |
| B2R9S4     | cDNA, FLJ94534, highly similar to HEAT repeat domain-containing protein 1 OS=Homo sapiens           | 345.9   | 429.5  | 1.24 | 374.1  | 1.08 | 304.8  | 0.88 | 409.4  | 1.18 | 418.8  | 1.21 | 414.3  | 1.20 | 386.5  | 1.12 |
| Q9UNF0     | Protein kinase C and casein kinase 2B OS=Homo sapiens                                               | 87.7    | 113.8  | 1.30 | 88.1   | 1.00 | 82     | 0.94 | 86.2   | 0.98 | 96.6   | 1.10 | 86.8   | 0.99 | 88.5   | 1.01 |
| Q92626     | Peroxidasin homolog OS=Homo sapiens                                                                 | 473.6   | 502.6  | 1.06 | 374.6  | 0.79 | 450.9  | 0.95 | 519.3  | 1.10 | 480.2  | 1.01 | 484.8  | 1.02 | 411.6  | 0.87 |
| A7U7M2     | Prion protein 2 (Dublet) OS=Homo sapiens                                                            | 541.8   | 491.1  | 0.91 | 387.7  | 0.72 | 394.6  | 0.73 | 557.2  | 1.03 | 463.6  | 0.86 | 502.4  | 0.93 | 445.8  | 0.82 |
| A0A024R321 | Ras homolog gene family, member A OS=Homo sapiens                                                   | 180.3   | 241.7  | 1.34 | 211.6  | 1.17 | 151.2  | 0.84 | 216.2  | 1.20 | 200.1  | 1.11 | 211.9  | 1.18 | 171.5  | 0.95 |
| A0A140VJF1 | Testicular tissue protein Li 4 OS=Homo sapiens                                                      | 1629    | 1606.4 | 0.99 | 1615.9 | 0.99 | 1322.8 | 0.81 | 1825.1 | 1.12 | 2007.2 | 1.23 | 1269.3 | 0.78 | 1273.9 | 0.78 |
| B4DNE1     | cDNA FLJ52708, highly similar to protein tyrosine phosphatase SH-PTPase OS=Homo sapiens             | 1315.6  | 1232.1 | 0.94 | 1051.4 | 0.80 | 965.8  | 0.73 | 1151.8 | 0.88 | 1223.4 | 0.93 | 1385.8 | 1.05 | 1101.1 | 0.84 |
| P40199     | Carcinoembryonic antigen-related cell adhesion molecule 6 OS=Homo sapiens                           | 325     | 349.8  | 1.08 | 353    | 1.09 | 250.2  | 0.77 | 367    | 1.13 | 327.1  | 1.01 | 365.5  | 1.12 | 316.6  | 0.97 |
| Q00796     | Sorbitol dehydrogenase OS=Homo sapiens                                                              | 446.2   | 686.6  | 1.54 | 565.3  | 1.27 | 402    | 0.90 | 526.4  | 1.18 | 544.3  | 1.22 | 482.9  | 1.08 | 356.4  | 0.80 |
| Q16610     | Extracellular matrix protein 1 OS=Homo sapiens                                                      | 111.2   | 138.6  | 1.25 | 99.2   | 0.89 | 111.4  | 1.00 | 123.6  | 1.11 | 109.2  | 0.98 | 115.1  | 1.04 | 108.8  | 0.98 |
| A0A193CHI1 | I0E8 heavy chain variable region OS=Homo sapiens                                                    | 299.2   | 323    | 1.08 | 277.2  | 0.93 | 277.4  | 0.93 | 324.6  | 1.08 | 344.5  | 1.15 | 356.2  | 1.19 | 334.3  | 1.12 |
| B2R597     | cDNA, FLJ92390, highly similar to protein tyrosine phosphatase SH-PTPase OS=Homo sapiens            | 12181.9 | 9325.5 | 0.77 | 9386.4 | 0.77 | 7418.6 | 0.61 | 9548.3 | 0.78 | 9352.6 | 0.77 | 2737.9 | 0.22 | 4333.9 | 0.36 |
| P20151     | Kallikrein-2 OS=Homo sapiens                                                                        |         |        |      |        |      |        |      |        |      |        |      |        |      |        |      |
| Q9Y376     | Calcium-binding protein 39 OS=Homo sapiens                                                          | 197     | 241    | 1.22 | 199.4  | 1.01 | 144.7  | 0.73 | 218.1  | 1.11 | 224.5  | 1.14 | 205.7  | 1.04 | 147.1  | 0.75 |
| A0A140VJK1 | Testicular tissue protein Li 8 OS=Homo sapiens                                                      | 138.2   | 169.6  | 1.23 | 136.7  | 0.99 | 123.7  | 0.90 | 148.1  | 1.07 | 149.7  | 1.08 | 139.7  | 1.01 | 130.9  | 0.95 |
| Q0ZCH6     | Immunoglobulin heavy chain 1 OS=Homo sapiens                                                        | 522     | 587.5  | 1.13 | 508.3  | 0.97 | 538.1  | 1.03 | 771.4  | 1.48 | 534.1  | 1.02 | 589.1  | 1.13 | 544.5  | 1.04 |
| Q9BXN2     | C-type lectin domain family 15 member C OS=Homo sapiens                                             | 420.9   | 416.2  | 0.99 | 382.7  | 0.91 | 326.9  | 0.78 | 393.8  | 0.94 | 385    | 0.91 | 526.4  | 1.25 | 402.3  | 0.96 |
| Q8TCD5     | 5'(3')-deoxyribonucleotidase OS=Homo sapiens                                                        | 528.8   | 586.3  | 1.11 | 496.2  | 0.94 | 436    | 0.82 | 541.1  | 1.02 | 570.5  | 1.08 | 585.2  | 1.11 | 467.6  | 0.88 |
| B4DMS4     | cDNA FLJ59350 OS=Homo sapiens                                                                       | 369.1   | 558.8  | 1.51 | 527    | 1.43 | 395.8  | 1.07 | 590.7  | 1.60 | 608.2  | 1.65 | 594.4  | 1.61 | 495.7  | 1.34 |
| Q9NP79     | Vacuolar protein sorting-associated protein 39 OS=Homo sapiens                                      | 37.1    | 46.8   | 1.26 | 30.5   | 0.82 | 34.5   | 0.93 | 36.9   | 0.99 | 42.8   | 1.15 | 39.2   | 1.06 | 46.4   | 1.25 |
| Q9UGM3     | Deleted in malignant brain tumor 1 OS=Homo sapiens                                                  | 214.2   | 195.1  | 0.91 | 201.8  | 0.94 | 178.1  | 0.83 | 171.8  | 0.80 | 160.3  | 0.75 | 202.5  | 0.95 | 200.3  | 0.94 |
| A8K0T9     | cDNA FLJ75422, highly similar to protein tyrosine phosphatase SH-PTPase OS=Homo sapiens             | 238.9   | 370.4  | 1.55 | 374.5  | 1.57 | 216.2  | 0.90 | 349    | 1.46 | 362.7  | 1.52 | 369.4  | 1.55 | 279.8  | 1.17 |
| P23468     | Receptor-type tyrosine-protein kinase with Ig-like and fibronectin type III domains OS=Homo sapiens | 48.4    | 54.4   | 1.12 | 39.6   | 0.82 | 39.9   | 0.82 | 32.9   | 0.68 | 42.9   | 0.89 | 82.3   | 1.70 | 31     | 0.64 |
| P24592     | Insulin-like growth factor-binding protein-5 OS=Homo sapiens                                        | 785     | 865.4  | 1.10 | 908.8  | 1.16 | 760.7  | 0.97 | 865    | 1.10 | 812.3  | 1.03 | 844.8  | 1.08 | 829.2  | 1.06 |
| P20827     | Ephrin-A1 OS=Homo sapiens                                                                           | 1456.4  | 1424.5 | 0.98 | 1376.3 | 0.95 | 976.8  | 0.67 | 1436   | 0.99 | 1513.2 | 1.04 | 1470.8 | 1.01 | 1186.4 | 0.81 |
| Q9UIU0     | Dihydropyridine receptor alpha OS=Homo sapiens                                                      | 439     | 442.2  | 1.01 | 448.9  | 1.02 | 434.8  | 0.99 | 458.6  | 1.04 | 534.3  | 1.22 | 450.8  | 1.03 | 378.3  | 0.86 |
| P01210     | Proenkephalin-A OS=Homo sapiens                                                                     | 752.9   | 888.3  | 1.18 | 775    | 1.03 | 1029.9 | 1.37 | 853.9  | 1.13 | 785.3  | 1.04 | 764.7  | 1.02 | 703.1  | 0.93 |
| P06703     | Protein S100-A6 OS=Homo sapiens                                                                     | 2629.1  | 2621.2 | 1.00 | 2536.2 | 0.96 | 1732.2 | 0.66 | 2589.1 | 0.98 | 3375.7 | 1.28 | 3079.8 | 1.17 | 3340.9 | 1.27 |
| A0A024RBT1 | Tetraspanin OS=Homo sapiens                                                                         | 1265.1  | 1531.3 | 1.21 | 1467.4 | 1.16 | 1195.2 | 0.94 | 1469.9 | 1.16 | 1382.3 | 1.09 | 1209.3 | 0.96 | 1181.8 | 0.93 |
| Q9H0B8     | Cysteine-rich secretory protein 1 OS=Homo sapiens                                                   | 601.1   | 627.2  | 1.04 | 623.6  | 1.04 | 559.7  | 0.93 | 583.5  | 0.97 | 584.2  | 0.97 | 467.9  | 0.78 | 479.4  | 0.80 |
| P08729     | Keratin, type II cytoskeletal 1 OS=Homo sapiens                                                     | 78.3    | 137.6  | 1.76 | 73.7   | 0.94 | 60.5   | 0.77 | 69.4   | 0.89 | 74.3   | 0.95 | 109.6  | 1.40 | 151.1  | 1.93 |
| P25815     | Protein S100-P OS=Homo sapiens                                                                      | 900.9   | 1048.1 | 1.16 | 841.3  | 0.93 | 548.2  | 0.61 | 869.6  | 0.97 | 1204.9 | 1.34 | 1073.2 | 1.19 | 1676.1 | 1.86 |
| P14625     | Endoplasmic reticulum chaperone protein OS=Homo sapiens                                             |         |        |      |        |      |        |      |        |      |        |      |        |      |        |      |
| A0A024R131 | Glycerol-3-phosphate dehydrogenase OS=Homo sapiens                                                  | 437.7   | 871.9  | 1.99 | 478.6  | 1.09 | 510.2  | 1.17 | 500.7  | 1.14 | 553.8  | 1.27 | 512.5  | 1.17 | 409.5  | 0.94 |
| B1PS43     | Myosin heavy chain 11 smooth muscle type II OS=Homo sapiens                                         | 156.6   | 277.4  | 1.77 | 174.6  | 1.11 | 171.4  | 1.09 | 191.6  | 1.22 | 185.1  | 1.18 | 211.5  | 1.35 | 207.8  | 1.33 |
| A0A087WY1  | Seizure 6-like protein 2 OS=Homo sapiens                                                            | 107.6   | 178    | 1.65 | 98.7   | 0.92 | 99.9   | 0.93 | 105.3  | 0.98 | 110.5  | 1.03 | 109.3  | 1.02 | 104.6  | 0.97 |
| P01709     | Immunoglobulin lambda variable region 1 OS=Homo sapiens                                             | 1720.5  | 1762.5 | 1.02 | 2050.9 | 1.19 | 1622.8 | 0.94 | 1830.7 | 1.06 | 1804.7 | 1.05 | 1761.2 | 1.02 | 1809   | 1.05 |
| B2R983     | cDNA, FLJ94267, highly similar to protein tyrosine phosphatase SH-PTPase OS=Homo sapiens            | 356.1   | 497.6  | 1.40 | 350.4  | 0.98 | 404.1  | 1.13 | 417.9  | 1.17 | 450    | 1.26 | 461.9  | 1.30 | 372.9  | 1.05 |
| A0A1C3PH1  | MHC class I antigen OS=Homo sapiens                                                                 |         |        |      |        |      |        |      |        |      |        |      |        |      |        |      |
| A0A024RD1  | Scavenger receptor class B, member 1 OS=Homo sapiens                                                | 254.2   | 268.1  | 1.05 | 209.6  | 0.82 | 200.4  | 0.79 | 251.5  | 0.99 | 248.5  | 0.98 | 257    | 1.01 | 241.1  | 0.95 |
| P13640     | Metallothionein-1G OS=Homo sapiens                                                                  | 559.1   | 642.5  | 1.15 | 672.2  | 1.20 | 426.7  | 0.76 | 749.1  | 1.34 | 744.3  | 1.33 | 866.3  | 1.55 | 768.9  | 1.38 |
| B4DJQ5     | cDNA FLJ59211, highly similar to protein tyrosine phosphatase SH-PTPase OS=Homo sapiens             | 436.2   | 503.5  | 1.15 | 471.9  | 1.08 | 357    | 0.82 | 544.3  | 1.25 | 507.3  | 1.16 | 479.7  | 1.10 | 412    | 0.94 |
| Q16661     | Guanylate cyclase activator 1 OS=Homo sapiens                                                       | 58.1    | 77.1   | 1.33 | 255.4  | 4.40 | 55.6   | 0.96 | 74.8   | 1.29 | 74.3   | 1.28 | 83     | 1.43 | 64.4   | 1.11 |
| Q96C23     | Aldose 1-epimerase OS=Homo sapiens                                                                  | 33.6    | 40.1   | 1.19 | 37.1   | 1.10 | 34.5   | 1.03 | 45.4   | 1.35 | 42.7   | 1.27 | 51.1   | 1.52 | 39.9   | 1.19 |
| J3KNB4     | Cathelicidin antimicrobial peptide OS=Homo sapiens                                                  | 767.1   | 824.5  | 1.07 | 776.3  | 1.01 | 687.1  | 0.90 | 854.3  | 1.11 | 778.5  | 1.01 | 945.5  | 1.23 | 955.3  | 1.25 |



|           |                              |        |        |      |        |      |        |      |        |      |        |      |        |      |        |      |
|-----------|------------------------------|--------|--------|------|--------|------|--------|------|--------|------|--------|------|--------|------|--------|------|
| Q86UD1    | Out at first protein homolog | 662.9  | 741.8  | 1.12 | 579.9  | 0.87 | 648.7  | 0.98 | 639.2  | 0.96 | 774.1  | 1.17 | 816.5  | 1.23 | 652.4  | 0.98 |
| J3KPA1    | Cysteine-rich secretory prot | 1153.4 | 846.6  | 0.73 | 678.2  | 0.59 | 686.2  | 0.59 | 815.2  | 0.71 | 1100.2 | 0.95 | 768.3  | 0.67 | 908.6  | 0.79 |
| A0A1C9J6C | B cell receptor kappa chain  | 475.4  | 562    | 1.18 | 568.8  | 1.20 | 540.6  | 1.14 | 476.3  | 1.00 | 525    | 1.10 | 524.9  | 1.10 | 483.8  | 1.02 |
| G3XAI2    | Laminin subunit beta-1 OS=   | 400.8  | 451.9  | 1.13 | 413.4  | 1.03 | 392.9  | 0.98 | 399.7  | 1.00 | 394.8  | 0.99 | 492.2  | 1.23 | 361    | 0.90 |
| Q9H6B4    | CXADR-like membrane pro      | 1006.1 | 885.2  | 0.88 | 1107.5 | 1.10 | 697.3  | 0.69 | 940.9  | 0.94 | 968.6  | 0.96 | 931.8  | 0.93 | 1076.6 | 1.07 |
| M0R1T5    | Charged multivesicular bod   | 898.2  | 980.7  | 1.09 | 828.5  | 0.92 | 748.1  | 0.83 | 1024   | 1.14 | 1025.2 | 1.14 | 991.9  | 1.10 | 771.8  | 0.86 |
| B2RD36    | cDNA, FLJ96437 OS=Homo       | 855.7  | 1492.3 | 1.74 | 900.7  | 1.05 | 954.5  | 1.12 | 1036.2 | 1.21 | 1323.4 | 1.55 | 1136.8 | 1.33 | 869.9  | 1.02 |
| A8K2T6    | cDNA FLJ76013, highly sin    | 665.8  | 703.3  | 1.06 | 624    | 0.94 | 587.6  | 0.88 | 715.9  | 1.08 | 667.7  | 1.00 | 722.9  | 1.09 | 635.5  | 0.95 |
| V9HW90    | Epididymis luminal protein   | 185.3  | 295.1  | 1.59 | 211.7  | 1.14 | 192.2  | 1.04 | 232.4  | 1.25 | 238.6  | 1.29 | 224.1  | 1.21 | 218.7  | 1.18 |
| A2N4P8    | IL2R protein (Fragment) OS   | 217.5  | 253.3  | 1.16 | 187.2  | 0.86 | 203.7  | 0.94 | 229    | 1.05 | 207.5  | 0.95 | 218.4  | 1.00 | 244    | 1.12 |
| A2NW97    | Rheumatoid factor Vh I regi  | 395.2  | 438.5  | 1.11 | 385.4  | 0.98 | 497.1  | 1.26 | 397.1  | 1.00 | 387.4  | 0.98 | 383.6  | 0.97 | 441.3  | 1.12 |
| H7C2F2    | CD99 antigen (Fragment) O    | 165.1  | 154.8  | 0.94 | 175.9  | 1.07 | 131.9  | 0.80 | 149.6  | 0.91 | 136.9  | 0.83 | 168.1  | 1.02 | 129.4  | 0.78 |
| V9GYM3    | Apolipoprotein A-II OS=Hc    | 315.6  | 521.7  | 1.65 | 362.2  | 1.15 | 408.4  | 1.29 | 414.5  | 1.31 | 356.9  | 1.13 | 635.1  | 2.01 | 438.5  | 1.39 |
| B2R7Z2    | cDNA, FLJ93669, highly sin   | 286.3  | 183.6  | 0.64 | 453.3  | 1.58 | 131    | 0.46 | 307.3  | 1.07 | 240.1  | 0.84 | 294.5  | 1.03 | 324.2  | 1.13 |
| P12724    | Eosinophil cationic protein  | 77.9   | 120.6  | 1.55 | 114.8  | 1.47 | 119.5  | 1.53 | 103    | 1.32 | 122.3  | 1.57 | 103.4  | 1.33 | 136.5  | 1.75 |
| A0A0A0MC  | Laminin subunit alpha-4 OS   | 554.8  | 576.6  | 1.04 | 592.8  | 1.07 | 437.2  | 0.79 | 740.9  | 1.34 | 557    | 1.00 | 567.9  | 1.02 | 490.8  | 0.88 |
| O00526    | Uroplakin-2 OS=Homo sapi     | 169.9  | 148    | 0.87 | 145    | 0.85 | 112    | 0.66 | 145.4  | 0.86 | 154.1  | 0.91 | 151.4  | 0.89 | 111.1  | 0.65 |
| A0A0C4DH  | Immunoglobulin kappa vari    | 320.2  | 330.6  | 1.03 | 334    | 1.04 | 352.9  | 1.10 | 300.3  | 0.94 | 293.5  | 0.92 | 359.9  | 1.12 | 314.8  | 0.98 |
| A0N7J6    | REV25-2 (Fragment) OS=H      | 2623.9 | 2349.9 | 0.90 | 3333.3 | 1.27 | 1832.2 | 0.70 | 2334.3 | 0.89 | 2874   | 1.10 | 2715.3 | 1.03 | 3016.2 | 1.15 |
| Q8N3J6    | Cell adhesion molecule 2 O   | 226.2  | 220.8  | 0.98 | 222.4  | 0.98 | 135.6  | 0.60 | 198.5  | 0.88 | 202.8  | 0.90 | 203.5  | 0.90 | 193.6  | 0.86 |
| P27482    | Calmodulin-like protein 3 O  | 76.5   | 84.2   | 1.10 | 86.7   | 1.13 | 68.6   | 0.90 | 92.8   | 1.21 | 81.6   | 1.07 | 95.7   | 1.25 | 76.1   | 0.99 |
| P04732    | Metallothionein-1E OS=Ho     | 191.4  | 254    | 1.33 | 251.7  | 1.32 | 158    | 0.83 | 264    | 1.38 | 223.3  | 1.17 | 246.3  | 1.29 | 267.3  | 1.40 |
| Q53FE8    | cDNA FLJ36526 fis, clone     | 1131.9 | 1238.4 | 1.09 | 960.9  | 0.85 | 1061.7 | 0.94 | 1097.3 | 0.97 | 1221.9 | 1.08 | 1089.9 | 0.96 | 1157.5 | 1.02 |
| B2RA03    | cDNA, FLJ94640, highly sin   | 40.2   | 55.1   | 1.37 | 40.8   | 1.01 | 37.9   | 0.94 | 44.4   | 1.10 | 46.9   | 1.17 | 49.8   | 1.24 | 84.5   | 2.10 |
| O94772    | Lymphocyte antigen 6H OS     | 647.1  | 610.4  | 0.94 | 724.7  | 1.12 | 443.8  | 0.69 | 673.8  | 1.04 | 688.9  | 1.06 | 882.3  | 1.36 | 634.8  | 0.98 |
| C3VMY8    | Alpha B crystallin OS=Homo   | 449.9  | 670.4  | 1.49 | 480.8  | 1.07 | 514.7  | 1.14 | 530.1  | 1.18 | 657.6  | 1.46 | 546.5  | 1.21 | 531.7  | 1.18 |
| A0A024RD  | 3-hydroxybutyrate dehydrog   | 86.1   | 124.4  | 1.44 | 92.5   | 1.07 | 119.7  | 1.39 | 93.9   | 1.09 | 95.3   | 1.11 | 90.5   | 1.05 | 79.4   | 0.92 |
| A0A075B6I | Immunoglobulin lambda vari   | 1686   | 1561.4 | 0.93 | 2106.3 | 1.25 | 1329.5 | 0.79 | 1787   | 1.06 | 1749.1 | 1.04 | 2090.8 | 1.24 | 2051.3 | 1.22 |
| Q969H8    | Myeloid-derived growth fac   | 628.9  | 598.6  | 0.95 | 813.4  | 1.29 | 547    | 0.87 | 611.4  | 0.97 | 608.5  | 0.97 | 600.9  | 0.96 | 695.2  | 1.11 |
| A0A024RD  | Tumor necrosis factor recep  | 233.8  | 241.4  | 1.03 | 262.3  | 1.12 | 209.8  | 0.90 | 237.7  | 1.02 | 239.2  | 1.02 | 242.4  | 1.04 | 204.1  | 0.87 |
| P81605    | Dermcidin OS=Homo sapien     | 563.4  | 618    | 1.10 | 1243.9 | 2.21 | 520.9  | 0.92 | 708.1  | 1.26 | 690.7  | 1.23 | 658.5  | 1.17 | 818.3  | 1.45 |
| Q02413    | Desmoglein-1 OS=Homo sa      | 117.5  | 138.6  | 1.18 | 120.1  | 1.02 | 132.3  | 1.13 | 120.5  | 1.03 | 118.2  | 1.01 | 122.6  | 1.04 | 112    | 0.95 |
| Q9Y6Q6    | Tumor necrosis factor recep  | 139.8  | 169.1  | 1.21 | 162.6  | 1.16 | 104.8  | 0.75 | 158.9  | 1.14 | 145.6  | 1.04 | 149.7  | 1.07 | 134.6  | 0.96 |
| P15291    | Beta-1,4-galactosyltransfer  | 589.3  | 783    | 1.33 | 466.4  | 0.79 | 567    | 0.96 | 648.5  | 1.10 | 951    | 1.61 | 997.2  | 1.69 | 484.1  | 0.82 |
| A8K2U0    | Alpha-2-macroglobulin-like   | 313.5  | 366.3  | 1.17 | 309.3  | 0.99 | 284.2  | 0.91 | 315.2  | 1.01 | 295.3  | 0.94 | 282.6  | 0.90 | 361.2  | 1.15 |
| Q9HC38    | Glyoxalase domain-containi   | 331.6  | 498.6  | 1.50 | 388.2  | 1.17 | 319    | 0.96 | 357.1  | 1.08 | 408    | 1.23 | 360.4  | 1.09 | 321.7  | 0.97 |
| B1AH90    | Signal peptide, CUB and EC   | 118.8  | 100.6  | 0.85 | 170.1  | 1.43 | 79.4   | 0.67 | 116.6  | 0.98 | 101.8  | 0.86 | 107    | 0.90 | 116    | 0.98 |
| C0JYY2    | Apolipoprotein B (Including  | 40.5   | 99.2   | 2.45 | 64     | 1.58 | 64.4   | 1.59 | 61.9   | 1.53 | 50.3   | 1.24 | 95.9   | 2.37 | 49.6   | 1.22 |
| Q53SS8    | Epididymis secretory protei  | 44.4   | 62.8   | 1.41 | 59.6   | 1.34 | 37.2   | 0.84 | 56.6   | 1.27 | 63.6   | 1.43 | 56.5   | 1.27 | 58.3   | 1.31 |
| P07307    | Asialoglycoprotein receptor  | 40.5   | 42.3   | 1.04 | 43     | 1.06 | 57.1   | 1.41 | 41.9   | 1.03 | 47.7   | 1.18 | 40     | 0.99 | 35.8   | 0.88 |
| Q8NES3    | Beta-1,3-N-acetylglucosami   | 47.5   | 40.4   | 0.85 | 40.6   | 0.85 | 31.8   | 0.67 | 38.6   | 0.81 | 42     | 0.88 | 35.1   | 0.74 | 42.7   | 0.90 |
| P19021    | Peptidyl-glycine alpha-amid  | 96.2   | 98.6   | 1.02 | 88.9   | 0.92 | 75.9   | 0.79 | 92.7   | 0.96 | 100.1  | 1.04 | 129.3  | 1.34 | 83.3   | 0.87 |
| Q9UEF7    | Klotho OS=Homo sapiens C     | 214.6  | 279.8  | 1.30 | 257.9  | 1.20 | 230.4  | 1.07 | 264.9  | 1.23 | 250    | 1.16 | 258.7  | 1.21 | 200.7  | 0.94 |
| A8K865    | cDNA FLJ75789, highly sin    | 271.8  | 345.7  | 1.27 | 270.3  | 0.99 | 197.2  | 0.73 | 341.9  | 1.26 | 299.2  | 1.10 | 283.5  | 1.04 | 354    | 1.30 |
| O75340    | Programmed cell death prot   | 205    | 189    | 0.92 | 153.1  | 0.75 | 173.9  | 0.85 | 182.4  | 0.89 | 212.6  | 1.04 | 186.2  | 0.91 | 181.1  | 0.88 |
| P21266    | Glutathione S-transferase M  | 61.6   | 66     | 1.07 | 50.1   | 0.81 | 39.2   | 0.64 | 48.3   | 0.78 | 72.2   | 1.17 | 63.9   | 1.04 | 48.8   | 0.79 |
| A0A0B4J2E | Immunoglobulin kappa vari    | 101.1  | 89.8   | 0.89 | 85.7   | 0.85 | 85.5   | 0.85 | 77.9   | 0.77 | 82.1   | 0.81 | 94.4   | 0.93 | 67.6   | 0.67 |
| Q6IB39    | RNASE6 protein OS=Homo       | 310.4  | 351.3  | 1.13 | 500.5  | 1.61 | 279.2  | 0.90 | 465.7  | 1.50 | 368.4  | 1.19 | 370.8  | 1.19 | 347.1  | 1.12 |
| B2RCJ5    | cDNA, FLJ96113, highly sin   | 89     | 125    | 1.40 | 90.1   | 1.01 | 115.3  | 1.30 | 103.1  | 1.16 | 104.1  | 1.17 | 107.2  | 1.20 | 95     | 1.07 |
| Q59F30    | Fibroblast growth factor rec | 33.7   | 36.9   | 1.09 | 33.4   | 0.99 | 27.5   | 0.82 | 27.7   | 0.82 | 31.3   | 0.93 | 38.8   | 1.15 | 37.8   | 1.12 |
| C7FDU7    | MHC class I antigen (Fragm   |        |        |      |        |      |        |      |        |      |        |      |        |      |        |      |
| A0A024RBI | Vacuolar protein sorting 37I |        |        |      |        |      |        |      |        |      |        |      |        |      |        |      |
| H7C2N1    | Prothymosin alpha (Fragme    | 488.7  | 569.2  | 1.16 | 522.1  | 1.07 | 314.9  | 0.64 | 576.9  | 1.18 | 527.6  | 1.08 | 654.5  | 1.34 | 549.3  | 1.12 |
| Q495M3    | Proton-coupled amino acid    | 204.8  | 221.4  | 1.08 | 214.9  | 1.05 | 152.7  | 0.75 | 203.2  | 0.99 | 194.1  | 0.95 | 232.3  | 1.13 | 167.2  | 0.82 |
| Q04721    | Neurogenic locus notch hon   | 466.6  | 481.2  | 1.03 | 394.6  | 0.85 | 439    | 0.94 | 462.4  | 0.99 | 423.5  | 0.91 | 417.2  | 0.89 | 442.6  | 0.95 |
| A0A087WT  | Neuroblastoma suppressor c   | 2274.8 | 1931.4 | 0.85 | 2167   | 0.95 | 1555.1 | 0.68 | 2070.6 | 0.91 | 2151.1 | 0.95 | 1769.4 | 0.78 | 1990.9 | 0.88 |
| Q9NZU0    | Leucine-rich repeat transme  | 23.7   | 20     | 0.84 | 17.8   | 0.75 | 13.4   | 0.57 | 18.3   | 0.77 | 26     | 1.10 | 19.6   | 0.83 | 18.1   | 0.76 |
| A0A0A0MT  | Titin OS=Homo sapiens GN     | 154.4  | 181    | 1.17 | 143.9  | 0.93 | 131.7  | 0.85 | 172.5  | 1.12 | 184.8  | 1.20 | 256    | 1.66 | 195.2  | 1.26 |

|           |                               |        |        |      |        |      |        |      |        |      |        |      |        |      |        |      |
|-----------|-------------------------------|--------|--------|------|--------|------|--------|------|--------|------|--------|------|--------|------|--------|------|
| E7ERL8    | Neurexin-1-beta OS=Homo       | 982.7  | 1014.5 | 1.03 | 785.4  | 0.80 | 812.8  | 0.83 | 993.7  | 1.01 | 949.7  | 0.97 | 900.2  | 0.92 | 846.1  | 0.86 |
| O96033    | Molybdopterin synthase sul    | 328.1  | 326.8  | 1.00 | 303.4  | 0.92 | 280.7  | 0.86 | 312.9  | 0.95 | 361.7  | 1.10 | 331.1  | 1.01 | 305.8  | 0.93 |
| Q9NP85    | Podocin OS=Homo sapiens       | 105.2  | 101.3  | 0.96 | 102.8  | 0.98 | 92.9   | 0.88 | 95.8   | 0.91 | 99.4   | 0.94 | 113.6  | 1.08 | 80.7   | 0.77 |
| P04430    | Immunoglobulin kappa varia    |        |        |      |        |      |        |      |        |      |        |      |        |      |        |      |
| A0A140VK  | Testis secretory sperm-bind   | 201.6  | 306    | 1.52 | 265.6  | 1.32 | 193.6  | 0.96 | 267    | 1.32 | 278.8  | 1.38 | 245.7  | 1.22 | 218.2  | 1.08 |
| Q59EA3    | Cadherin 5, type 2 prepropr   | 31.7   | 27     | 0.85 | 43.2   | 1.36 | 24.1   | 0.76 | 36.3   | 1.15 | 37.2   | 1.17 | 26.3   | 0.83 | 45.4   | 1.43 |
| B3KQT8    | cDNA PSEC0172 fis, clone      | 391.1  | 384.5  | 0.98 | 386.2  | 0.99 | 320.4  | 0.82 | 383.5  | 0.98 | 415.3  | 1.06 | 464.9  | 1.19 | 350.9  | 0.90 |
| J3QQX2    | Rho GDP-dissociation inhib    | 379.3  | 418.3  | 1.10 | 384.4  | 1.01 | 291.8  | 0.77 | 383.7  | 1.01 | 406.8  | 1.07 | 341.3  | 0.90 | 324.2  | 0.85 |
| Q13145    | BMP and activin membrane      | 609.5  | 721.2  | 1.18 | 716.1  | 1.17 | 499.1  | 0.82 | 686.7  | 1.13 | 651.3  | 1.07 | 736.3  | 1.21 | 548.2  | 0.90 |
| P52209    | 6-phosphogluconate dehydr     | 38.5   | 65.6   | 1.70 | 44.4   | 1.15 | 28.9   | 0.75 | 75.7   | 1.97 | 59.6   | 1.55 | 63.6   | 1.65 | 66.1   | 1.72 |
| E1U340    | ZNF511/PRAP1 fusion prot      | 132.7  | 165.1  | 1.24 | 180.6  | 1.36 | 109.3  | 0.82 | 108.7  | 0.82 | 149.5  | 1.13 | 140.2  | 1.06 | 120.8  | 0.91 |
| A1L3A3    | Contactin 2 (Axonal) OS=H     | 90.3   | 100.3  | 1.11 | 77.4   | 0.86 | 95     | 1.05 | 74.3   | 0.82 | 85     | 0.94 | 89.4   | 0.99 | 76.8   | 0.85 |
| Q6FHG5    | Gamma-synuclein OS=Hom        | 107.4  | 125.4  | 1.17 | 98.2   | 0.91 | 99.8   | 0.93 | 88.4   | 0.82 | 109.2  | 1.02 | 168.6  | 1.57 | 120    | 1.12 |
| A8K4A5    | cDNA FLJ77482, highly sin     | 364.1  | 453.2  | 1.24 | 345.1  | 0.95 | 446.9  | 1.23 | 402.3  | 1.10 | 466.4  | 1.28 | 436.6  | 1.20 | 293.7  | 0.81 |
| Q59FB9    | Toll interacting protein vari | 32.7   | 40.8   | 1.25 | 33.5   | 1.02 | 34.7   | 1.06 | 27.8   | 0.85 | 34.3   | 1.05 | 43.9   | 1.34 | 27     | 0.83 |
| Q9H6S3    | Epidermal growth factor rec   | 260.1  | 262.5  | 1.01 | 249.9  | 0.96 | 190.6  | 0.73 | 271.4  | 1.04 | 313.3  | 1.20 | 238.5  | 0.92 | 248.1  | 0.95 |
| A0A0B4J1R | 4-hydroxyphenylpyruvate di    | 90     | 135.8  | 1.51 | 93.1   | 1.03 | 99.6   | 1.11 | 99.8   | 1.11 | 124.5  | 1.38 | 113.8  | 1.26 | 77.7   | 0.86 |
| A0A024R3U | RAB4A, member RAS onc         | 32.2   | 28.9   | 0.90 | 39.9   | 1.24 | 24.3   | 0.75 | 33.8   | 1.05 | 36.2   | 1.12 | 32.5   | 1.01 | 26.2   | 0.81 |
| P03973    | Antileukoproteinase OS=Hc     | 431.3  | 423.3  | 0.98 | 599.4  | 1.39 | 265.8  | 0.62 | 552.7  | 1.28 | 486.9  | 1.13 | 358.9  | 0.83 | 398.8  | 0.92 |
| P51170    | Amiloride-sensitive sodium    | 446.9  | 377.2  | 0.84 | 270.6  | 0.61 | 256.5  | 0.57 | 322.6  | 0.72 | 414.9  | 0.93 | 372    | 0.83 | 303    | 0.68 |
| Q9H461    | Frizzled-8 OS=Homo sapie      | 671.3  | 660.3  | 0.98 | 701    | 1.04 | 481.4  | 0.72 | 692.9  | 1.03 | 680.7  | 1.01 | 536.9  | 0.80 | 744.7  | 1.11 |
| Q9UIH2    | Tumor necrosis factor recep   |        |        |      |        |      |        |      |        |      |        |      |        |      |        |      |
| Q8IX04    | Ubiquitin-conjugating enzyr   | 171    | 196.9  | 1.15 | 171.8  | 1.00 | 165.5  | 0.97 | 201.4  | 1.18 | 198.6  | 1.16 | 192.3  | 1.12 | 143.1  | 0.84 |
| E0D851    | Platelet glycoprotein Ib alph | 339.9  | 303.1  | 0.89 | 480.4  | 1.41 | 241.3  | 0.71 | 306.7  | 0.90 | 289.2  | 0.85 | 319.5  | 0.94 | 387.8  | 1.14 |
| Q08629    | Testican-1 OS=Homo sapie      | 171.3  | 178.7  | 1.04 | 123.5  | 0.72 | 137.4  | 0.80 | 123.8  | 0.72 | 178    | 1.04 | 244.7  | 1.43 | 161.4  | 0.94 |
| Q6FHJ7    | Secreted frizzled-related pr  |        |        |      |        |      |        |      |        |      |        |      |        |      |        |      |
| M0R2A0    | ER membrane protein comp      | 363.1  | 434.3  | 1.20 | 403.2  | 1.11 | 333.2  | 0.92 | 392.1  | 1.08 | 403.6  | 1.11 | 418    | 1.15 | 380.2  | 1.05 |
| P41217    | OX-2 membrane glycoprote      | 206.1  | 281.4  | 1.37 | 163.2  | 0.79 | 156    | 0.76 | 177.1  | 0.86 | 208.6  | 1.01 | 198.4  | 0.96 | 190.4  | 0.92 |
| P04040    | Catalase OS=Homo sapiens      | 121    | 208.2  | 1.72 | 118.8  | 0.98 | 176.6  | 1.46 | 136.9  | 1.13 | 122.1  | 1.01 | 150.9  | 1.25 | 142.6  | 1.18 |
| Q5T9B7    | Adenylate kinase isoenzyme    | 184.3  | 220.3  | 1.20 | 237.8  | 1.29 | 160.4  | 0.87 | 199.6  | 1.08 | 214.7  | 1.16 | 222.1  | 1.21 | 186    | 1.01 |
| Q6DKI7    | Transmembrane protein PV1     | 38     | 32.6   | 0.86 | 37.4   | 0.98 | 31.4   | 0.83 | 29.6   | 0.78 | 37.1   | 0.98 | 37     | 0.97 | 36.6   | 0.96 |
| Q5TBU5    | HCG1773630 OS=Homo se         | 329.8  | 357.7  | 1.08 | 354.9  | 1.08 | 235.1  | 0.71 | 329.4  | 1.00 | 387.6  | 1.18 | 376.1  | 1.14 | 334.3  | 1.01 |
| P05091    | Aldehyde dehydrogenase, m     | 445.7  | 405.9  | 0.91 | 337.3  | 0.76 | 286.8  | 0.64 | 386.3  | 0.87 | 392    | 0.88 | 498    | 1.12 | 460.4  | 1.03 |
| P30047    | GTP cyclohydrolase 1 feedb    | 235.6  | 271.7  | 1.15 | 211.3  | 0.90 | 400.7  | 1.70 | 226.7  | 0.96 | 227.2  | 0.96 | 255.3  | 1.08 | 256.1  | 1.09 |
| H0YBZ2    | HLA class II histocompatibi   | 274.6  | 269.2  | 0.98 | 297.7  | 1.08 | 207.8  | 0.76 | 261.5  | 0.95 | 267.9  | 0.98 | 251    | 0.91 | 279.4  | 1.02 |
| Q9NX12    | cDNA FLJ20496 fis, clone      | 15.3   | 22.1   | 1.44 | 17     | 1.11 | 19.4   | 1.27 | 16.7   | 1.09 | 17.3   | 1.13 | 18.2   | 1.19 | 20.1   | 1.31 |
| P04275    | von Willebrand factor OS=I    | 93.5   | 105    | 1.12 | 110    | 1.18 | 70.9   | 0.76 | 112.1  | 1.20 | 100.8  | 1.08 | 128.3  | 1.37 | 91.8   | 0.98 |
| A4D0V4    | Capping protein (Actin filan  | 20.4   | 38     | 1.86 | 24.1   | 1.18 | 19.3   | 0.95 | 27.7   | 1.36 | 28.4   | 1.39 | 25.3   | 1.24 | 23.7   | 1.16 |
| A0A024R4Z | Alkaline phosphatase OS=H     | 60.2   | 95.8   | 1.59 | 84     | 1.40 | 42.8   | 0.71 | 64.5   | 1.07 | 71.3   | 1.18 | 54.8   | 0.91 | 77.3   | 1.28 |
| A0A0B4J1Y | Immunoglobulin heavy vari     | 818.1  | 866.3  | 1.06 | 781.2  | 0.95 | 845    | 1.03 | 956.7  | 1.17 | 917    | 1.12 | 770.6  | 0.94 | 938.3  | 1.15 |
| A0A0C4DH  | Protein IGHV3-38 (Fragme      | 198.3  | 329.9  | 1.66 | 264.4  | 1.33 | 234.3  | 1.18 | 265.1  | 1.34 | 232    | 1.17 | 232.8  | 1.17 | 197.9  | 1.00 |
| A0A140VJF | Testicular tissue protein Li  | 145.8  | 62.9   | 1.37 | 44.8   | 0.98 | 45     | 0.98 | 42.9   | 0.94 | 48.2   | 1.05 | 48.5   | 1.06 | 44.2   | 0.97 |
| P38606    | V-type proton ATPase catal    | 392.4  | 579.3  | 1.48 | 472.7  | 1.20 | 392.9  | 1.00 | 491.1  | 1.25 | 551.3  | 1.40 | 557.4  | 1.42 | 412.8  | 1.05 |
| Q13443    | Disintegrin and metallopro    | 139.8  | 138.9  | 0.99 | 101.6  | 0.73 | 111.1  | 0.79 | 119.6  | 0.86 | 137.6  | 0.98 | 125.2  | 0.90 | 124.1  | 0.89 |
| P03951    | Coagulation factor XI OS=I    | 77.2   | 89.1   | 1.15 | 92.9   | 1.20 | 65.7   | 0.85 | 73     | 0.95 | 80.2   | 1.04 | 71.8   | 0.93 | 81     | 1.05 |
| P13688    | Carcinoembryonic antigen-r    | 77.3   | 101.9  | 1.32 | 81.2   | 1.05 | 145    | 1.88 | 97.9   | 1.27 | 93.1   | 1.20 | 90.4   | 1.17 | 64.8   | 0.84 |
| F1T0L0    | LY6/PLAUR domain contai       | 291.3  | 254.5  | 0.87 | 198.8  | 0.68 | 474.9  | 1.63 | 235    | 0.81 | 245.6  | 0.84 | 197.6  | 0.68 | 199.8  | 0.69 |
| A0A0F7TA  | IGHV5-51 protein (Fragme      | 298.3  | 341.1  | 1.14 | 267.2  | 0.90 | 284.3  | 0.95 | 304.6  | 1.02 | 319.3  | 1.07 | 352.1  | 1.18 | 334.6  | 1.12 |
| Q68CJ9    | Cyclic AMP-responsive ele     | 1983.8 | 1786.2 | 0.90 | 1292.7 | 0.65 | 1177.1 | 0.59 | 1312.2 | 0.66 | 1536.9 | 0.77 | 1710.6 | 0.86 | 1563.2 | 0.79 |
| P48740    | Mannan-binding lectin serin   | 79.2   | 95.1   | 1.20 | 87     | 1.10 | 77.2   | 0.97 | 83.6   | 1.06 | 78.7   | 0.99 | 79.9   | 1.01 | 65.6   | 0.83 |
| H0YMD1    | Low-density lipoprotein rec   | 1237.7 | 1161.4 | 0.94 | 1156.6 | 0.93 | 819.6  | 0.66 | 1033.7 | 0.84 | 1101.8 | 0.89 | 1176.6 | 0.95 | 994.7  | 0.80 |
| A0A140VJE | Guanylate cyclase OS=Hom      | 82.9   | 122.6  | 1.48 | 80.2   | 0.97 | 107.8  | 1.30 | 76.9   | 0.93 | 87.7   | 1.06 | 104.5  | 1.26 | 68.1   | 0.82 |
| Q8N474    | Secreted frizzled-related pr  | 63.3   | 69.1   | 1.09 | 72.5   | 1.15 | 46.7   | 0.74 | 66.6   | 1.05 | 78.1   | 1.23 | 97.4   | 1.54 | 53.2   | 0.84 |
| B2RDI5    | cDNA, FLJ96627, highly sii    | 146.3  | 177.4  | 1.21 | 176.8  | 1.21 | 133.6  | 0.91 | 178    | 1.22 | 171    | 1.17 | 153.7  | 1.05 | 156.2  | 1.07 |
| A0A024R2C | Cysteine-rich with EGF-like   | 54.1   | 54.2   | 1.00 | 33.9   | 0.63 | 42.3   | 0.78 | 40.8   | 0.75 | 50.5   | 0.93 | 55.8   | 1.03 | 52.7   | 0.97 |
| P01601    | Immunoglobulin kappa vari     | 45.5   | 36.6   | 0.80 | 46.7   | 1.03 | 35.4   | 0.78 | 38.1   | 0.84 | 42.3   | 0.93 | 46     | 1.01 | 41.2   | 0.91 |
| P08246    | Neutrophil elastase OS=Ho     | 343.6  | 698    | 2.03 | 435.3  | 1.27 | 307.3  | 0.89 | 476.7  | 1.39 | 467.3  | 1.36 | 783.7  | 2.28 | 579    | 1.69 |
| Q9NP84    | Tumor necrosis factor recep   | 882.1  | 783    | 0.89 | 972.6  | 1.10 | 539.2  | 0.61 | 805.6  | 0.91 | 815.5  | 0.92 | 1053.8 | 1.19 | 932.4  | 1.06 |



|           |                               |       |        |      |        |      |        |      |        |      |        |      |        |      |        |      |
|-----------|-------------------------------|-------|--------|------|--------|------|--------|------|--------|------|--------|------|--------|------|--------|------|
| P61604    | 10 kDa heat shock protein, r  | 196.8 | 81.8   | 0.85 | 68.9   | 0.71 | 45.4   | 0.47 | 67     | 0.69 | 89.2   | 0.92 | 94.9   | 0.98 | 63.5   | 0.66 |
| Q06828    | Fibromodulin OS=Homo sa       | 345.6 | 329.9  | 0.95 | 449.2  | 1.30 | 272.6  | 0.79 | 305.2  | 0.88 | 322.7  | 0.93 | 329.6  | 0.95 | 269.3  | 0.78 |
| Q86SQ8    | Beta-defensin-1 (Fragment)    | 268.5 | 304.5  | 1.13 | 470.9  | 1.75 | 245.3  | 0.91 | 347.5  | 1.29 | 277.7  | 1.03 | 309.6  | 1.15 | 583.1  | 2.17 |
| A6XMV9    | Protease serine 2 preproprot  | 95.5  | 103.6  | 1.08 | 144    | 1.51 | 75.1   | 0.79 | 86.9   | 0.91 | 108.9  | 1.14 | 87     | 0.91 | 97.4   | 1.02 |
| A8K669    | cDNA FLJ78452, highly sin     | 30.4  | 48.8   | 1.61 | 35.1   | 1.15 | 69.4   | 2.28 | 29.6   | 0.97 | 27     | 0.89 | 40.1   | 1.32 | 34.2   | 1.13 |
| P09529    | Inhibin beta B chain OS=Hc    | 189.4 | 193.1  | 1.02 | 181.7  | 0.96 | 158.5  | 0.84 | 180.3  | 0.95 | 203    | 1.07 | 216.8  | 1.14 | 175.3  | 0.93 |
| P29966    | Myristoylated alanine-rich C  | 270.4 | 286.4  | 1.06 | 232.1  | 0.86 | 274.9  | 1.02 | 281.1  | 1.04 | 333.6  | 1.23 | 319.7  | 1.18 | 267.5  | 0.99 |
| A2J1M8    | Rheumatoid factor RF-IP12     |       |        |      |        |      |        |      |        |      |        |      |        |      |        |      |
| A0A0K0K1  | Epididymis secretory sperm    | 331.6 | 527.2  | 1.59 | 321.9  | 0.97 | 331.9  | 1.00 | 393.6  | 1.19 | 454.7  | 1.37 | 466.8  | 1.41 | 389.6  | 1.17 |
| B4DQD2    | cDNA FLJ52935, highly sin     | 141   | 162.5  | 1.15 | 163.7  | 1.16 | 120.1  | 0.85 | 147.7  | 1.05 | 148.9  | 1.06 | 178.4  | 1.27 | 182.9  | 1.30 |
| P01706    | Immunoglobulin lambda var     | 669.4 | 595.3  | 0.89 | 572.2  | 0.85 | 482.2  | 0.72 | 505.5  | 0.76 | 498.8  | 0.75 | 632.5  | 0.94 | 881.9  | 1.32 |
| Q8NBS9    | Thioredoxin domain-contair    | 401.7 | 455    | 1.13 | 427.6  | 1.06 | 373.8  | 0.93 | 415.5  | 1.03 | 450.1  | 1.12 | 418.8  | 1.04 | 437.5  | 1.09 |
| D3DRD5    | Fibroblast growth factor rec  | 462.5 | 443.1  | 0.96 | 377.3  | 0.82 | 337.9  | 0.73 | 395.2  | 0.85 | 419.3  | 0.91 | 410.9  | 0.89 | 350.7  | 0.76 |
| Q8TCT8    | Signal peptide peptidase-lik  | 348.3 | 324.4  | 0.93 | 255.8  | 0.73 | 225.6  | 0.65 | 298.9  | 0.86 | 321.8  | 0.92 | 252.6  | 0.73 | 300.1  | 0.86 |
| J3KQ18    | D-dopachrome decarboxyla      | 220.3 | 368.8  | 1.67 | 226.4  | 1.03 | 211    | 0.96 | 209.5  | 0.95 | 294.9  | 1.34 | 265.2  | 1.20 | 220.2  | 1.00 |
| Q53GD1    | Guanine nucleotide-binding    | 93.5  | 123.9  | 1.33 | 102    | 1.09 | 115.1  | 1.23 | 94.5   | 1.01 | 103.4  | 1.11 | 99.5   | 1.06 | 98     | 1.05 |
| A0A087WY  | Glycoprotein hormones alph    | 415.7 | 439.2  | 1.06 | 500.6  | 1.20 | 302.8  | 0.73 | 385.9  | 0.93 | 442.7  | 1.06 | 516.7  | 1.24 | 398    | 0.96 |
| P14174    | Macrophage migration inhib    | 1538  | 2360.8 | 1.53 | 1882.7 | 1.22 | 1457.4 | 0.95 | 1941.2 | 1.26 | 2284.4 | 1.49 | 2061.6 | 1.34 | 1939.5 | 1.26 |
| P50897    | Palmitoyl-protein thioestera  | 155.9 | 178.1  | 1.14 | 142.9  | 0.92 | 153.5  | 0.98 | 153.4  | 0.98 | 175.5  | 1.13 | 155.9  | 1.00 | 136.5  | 0.88 |
| A0A024R8Z | L-selectin OS=Homo sapien     | 313   | 249.1  | 0.80 | 228.8  | 0.73 | 238.7  | 0.76 | 271.7  | 0.87 | 235.9  | 0.75 | 240.4  | 0.77 | 289.1  | 0.92 |
| Q7L0X0    | TLR4 interactor with leucin   | 179.7 | 187.3  | 1.04 | 173.1  | 0.96 | 115.2  | 0.64 | 164.8  | 0.92 | 187.9  | 1.05 | 186.2  | 1.04 | 147.4  | 0.82 |
| Q53H93    | Diphtheria toxin receptor (H  |       |        |      |        |      |        |      |        |      |        |      |        |      |        |      |
| P05387    | 60S acidic ribosomal protein  |       |        |      |        |      |        |      |        |      |        |      |        |      |        |      |
| A0A0J9YX  | Uncharacterized protein (Fr   | 201.9 | 259.7  | 1.29 | 205.1  | 1.02 | 225.1  | 1.11 | 222.3  | 1.10 | 237.7  | 1.18 | 210.6  | 1.04 | 210.6  | 1.04 |
| J3QL71    | Secernin-2 OS=Homo sapie      | 68.1  | 64.9   | 0.95 | 53     | 0.78 | 89.4   | 1.31 | 62.7   | 0.92 | 69     | 1.01 | 68.1   | 1.00 | 62.9   | 0.92 |
| P30039    | Phenazine biosynthesis-like   | 152.6 | 187.9  | 1.23 | 134.4  | 0.88 | 286.2  | 1.88 | 158.6  | 1.04 | 167.2  | 1.10 | 157.2  | 1.03 | 147.8  | 0.97 |
| A2NH53    | Immunoglobulin kappa, VJ r    | 76.9  | 71     | 0.92 | 95     | 1.24 | 94.4   | 1.23 | 82.9   | 1.08 | 84.2   | 1.09 | 76.1   | 0.99 | 72.6   | 0.94 |
| P83110    | Serine protease HTRA3 OS=     | 63.3  | 68.8   | 1.09 | 85.8   | 1.36 | 54.8   | 0.87 | 74     | 1.17 | 81.9   | 1.29 | 67.3   | 1.06 | 71.2   | 1.12 |
| Q9UN73    | Protocadherin alpha-6 OS=     | 40.4  | 31.1   | 0.77 | 31.4   | 0.78 | 29.3   | 0.73 | 36.9   | 0.91 | 43.9   | 1.09 | 29.8   | 0.74 | 37     | 0.92 |
| O75223    | Gamma-glutamylcyclotransf     | 195.6 | 224.9  | 1.15 | 183.1  | 0.94 | 139.5  | 0.71 | 198.5  | 1.01 | 196.5  | 1.00 | 192.5  | 0.98 | 198.6  | 1.02 |
| Q86V85    | Integral membrane protein C   | 196.6 | 176.3  | 0.90 | 212.7  | 1.08 | 185.7  | 0.94 | 190.2  | 0.97 | 191.9  | 0.98 | 186    | 0.95 | 184.9  | 0.94 |
| Q9UBX1    | Cathepsin F OS=Homo sapi      | 111.4 | 122.2  | 1.10 | 112.4  | 1.01 | 74.8   | 0.67 | 106.5  | 0.96 | 117.2  | 1.05 | 117    | 1.05 | 107.9  | 0.97 |
| P54727    | UV excision repair protein F  | 221.8 | 245.5  | 1.11 | 263.1  | 1.19 | 184.6  | 0.83 | 226.1  | 1.02 | 247.5  | 1.12 | 243.2  | 1.10 | 225.8  | 1.02 |
| A0A0U1RR  | Histone H2A OS=Homo sa        | 601.7 | 1265.2 | 2.10 | 1004.6 | 1.67 | 657    | 1.09 | 736.5  | 1.22 | 768.7  | 1.28 | 1312.5 | 2.18 | 1501.5 | 2.50 |
| A0A024RA  | Arylsulfatase B, isoform CR   | 236.9 | 348.4  | 1.47 | 208.9  | 0.88 | 177.6  | 0.75 | 252.2  | 1.06 | 249    | 1.05 | 377.4  | 1.59 | 280.4  | 1.18 |
| C6SUN5    | Agouti related protein homo   | 40.8  | 57.6   | 1.41 | 51.7   | 1.27 | 45.4   | 1.11 | 57.9   | 1.42 | 59.5   | 1.46 | 56.1   | 1.38 | 44.4   | 1.09 |
| P01258    | Calcitonin OS=Homo sapie      | 403.3 | 337.3  | 0.84 | 256.4  | 0.64 | 244.8  | 0.61 | 394.7  | 0.98 | 377.9  | 0.94 | 484.4  | 1.20 | 337.8  | 0.84 |
| A8K9M5    | cDNA FLJ77947, highly sin     | 227.6 | 266.1  | 1.17 | 179    | 0.79 | 218.4  | 0.96 | 235.1  | 1.03 | 237.7  | 1.04 | 231.4  | 1.02 | 297.9  | 1.31 |
| C9JJE7    | Mucin-20 OS=Homo sapien       | 232.7 | 231.2  | 0.99 | 183.3  | 0.79 | 172.6  | 0.74 | 174.9  | 0.75 | 230.8  | 0.99 | 225.1  | 0.97 | 214    | 0.92 |
| B2R880    | cDNA, FLJ93778, highly sin    | 44.1  | 59.7   | 1.35 | 50.9   | 1.15 | 44.9   | 1.02 | 37.9   | 0.86 | 43.2   | 0.98 | 25.8   | 0.59 | 28.1   | 0.64 |
| B4E3D4    | cDNA FLJ56293, highly sin     | 227.7 | 247.5  | 1.09 | 237.5  | 1.04 | 207.8  | 0.91 | 288.2  | 1.27 | 251.5  | 1.10 | 268.3  | 1.18 | 235.3  | 1.03 |
| B4E0V9    | cDNA FLJ61198, highly sin     | 247.7 | 321.7  | 1.30 | 188.6  | 0.76 | 267.3  | 1.08 | 234.5  | 0.95 | 234.7  | 0.95 | 313.8  | 1.27 | 269.9  | 1.09 |
| A0A024RA  | Bridging integrator 1, isofor | 97.9  | 102.2  | 1.04 | 99.4   | 1.02 | 80.5   | 0.82 | 99.3   | 1.01 | 100.3  | 1.02 | 93.2   | 0.95 | 104.4  | 1.07 |
| P29401    | Transketolase OS=Homo sa      | 98.4  | 169.1  | 1.72 | 153.2  | 1.56 | 86.8   | 0.88 | 120.2  | 1.22 | 135.8  | 1.38 | 144.1  | 1.46 | 143    | 1.45 |
| A0A0K0K1  | Proteasome subunit alpha ty   | 153.3 | 193.9  | 1.26 | 139.1  | 0.91 | 136.1  | 0.89 | 143.2  | 0.93 | 168    | 1.10 | 156.9  | 1.02 | 135.8  | 0.89 |
| A8K2N0    | cDNA FLJ77835, highly sin     | 191.2 | 248.6  | 1.30 | 174.1  | 0.91 | 212.7  | 1.11 | 218.5  | 1.14 | 219.3  | 1.15 | 215.7  | 1.13 | 198.7  | 1.04 |
| P16402    | Histone H1.3 OS=Homo sa       | 316   | 425.3  | 1.35 | 325.7  | 1.03 | 311.8  | 0.99 | 319.2  | 1.01 | 351.6  | 1.11 | 338.8  | 1.07 | 357.1  | 1.13 |
| Q92484    | Acid sphingomyelinase-like    | 52    | 64.5   | 1.24 | 69.1   | 1.33 | 58.4   | 1.12 | 76.4   | 1.47 | 59.9   | 1.15 | 50.5   | 0.97 | 56.8   | 1.09 |
| Q4G0I0    | Protein CCSMST1 OS=Homo       | 42    | 46.9   | 1.12 | 48.4   | 1.15 | 40     | 0.95 | 40.9   | 0.97 | 38.6   | 0.92 | 52.8   | 1.26 | 42     | 1.00 |
| B4DHQ3    | Phosphoserine aminotransfe    | 55.9  | 68.4   | 1.22 | 66.7   | 1.19 | 45.6   | 0.82 | 56.6   | 1.01 | 71.6   | 1.28 | 78     | 1.40 | 38.4   | 0.69 |
| A0A0F7RQ  | Luteinizing hormone beta pc   | 148.7 | 203.3  | 1.37 | 177.7  | 1.20 | 116.7  | 0.78 | 157.6  | 1.06 | 162.8  | 1.09 | 197.7  | 1.33 | 141.3  | 0.95 |
| Q9H1C7    | Cysteine-rich and transmem    | 70    | 66.4   | 0.95 | 79.3   | 1.13 | 49.4   | 0.71 | 76.9   | 1.10 | 75.7   | 1.08 | 72.3   | 1.03 | 81.3   | 1.16 |
| Q02388    | Collagen alpha-1(VII) chain   | 159.4 | 200    | 1.25 | 209.7  | 1.32 | 150.4  | 0.94 | 208.5  | 1.31 | 191.1  | 1.20 | 184.6  | 1.16 | 152.2  | 0.95 |
| A0A0A1HA  | H.sapiens ras-related Hrab2   | 92.1  | 208.1  | 2.26 | 93.3   | 1.01 | 122.1  | 1.33 | 95.6   | 1.04 | 100.7  | 1.09 | 107.1  | 1.16 | 91     | 0.99 |
| Q6E0U4    | Dermokine OS=Homo sapie       | 502.4 | 434.7  | 0.87 | 622    | 1.24 | 343    | 0.68 | 499.8  | 0.99 | 432.9  | 0.86 | 610.5  | 1.22 | 569.4  | 1.13 |
| P30626    | Sorcini OS=Homo sapiens G     | 172.9 | 208.4  | 1.21 | 190.1  | 1.10 | 185.6  | 1.07 | 186.5  | 1.08 | 193.4  | 1.12 | 193.2  | 1.12 | 175.9  | 1.02 |
| B4DMN1    | cDNA FLJ61136, highly sin     | 97.6  | 101.6  | 1.04 | 87.7   | 0.90 | 83.3   | 0.85 | 97     | 0.99 | 102.7  | 1.05 | 99.1   | 1.02 | 92.1   | 0.94 |
| A0A024R8C | Ubiquitin-related modifier 1  | 75.6  | 94.2   | 1.25 | 79.6   | 1.05 | 89.2   | 1.18 | 85.5   | 1.13 | 91.8   | 1.21 | 83.7   | 1.11 | 80.4   | 1.06 |

|          |                                                 |        |        |      |        |      |        |      |        |      |        |      |        |      |        |      |
|----------|-------------------------------------------------|--------|--------|------|--------|------|--------|------|--------|------|--------|------|--------|------|--------|------|
| P24298   | Alanine aminotransferase 1                      | 57.6   | 107.8  | 1.87 | 66.1   | 1.15 | 60.3   | 1.05 | 75.7   | 1.31 | 80.6   | 1.40 | 75     | 1.30 | 58     | 1.01 |
| V9HW88   | Calreticulin, isoform CRA_175                   | 75     | 81.1   | 1.08 | 58.9   | 0.79 | 57.1   | 0.76 | 59.9   | 0.80 | 74.5   | 0.99 | 70.8   | 0.94 | 75.2   | 1.00 |
| Q6UY14   | ADAMTS-like protein 4 OS=Homo sapiens           | 255.7  | 196.7  | 0.77 | 182.4  | 0.71 | 159.1  | 0.62 | 186.5  | 0.73 | 216.3  | 0.85 | 223.5  | 0.87 | 230.7  | 0.90 |
| P07360   | Complement component C8                         | 45.6   | 56.8   | 1.25 | 57.3   | 1.26 | 47.2   | 1.04 | 45.5   | 1.00 | 54.2   | 1.19 | 59.1   | 1.30 | 41.9   | 0.92 |
| E7EMK3   | Flotillin-2 OS=Homo sapiens                     | 27.6   | 47.2   | 1.71 | 32.1   | 1.16 | 29.1   | 1.05 | 33     | 1.20 | 27.2   | 0.99 | 29.6   | 1.07 | 23.8   | 0.86 |
| P49773   | Histidine triad nucleotide-binding domain 1     | 222.4  | 303.5  | 1.36 | 250.6  | 1.13 | 213.6  | 0.96 | 265    | 1.19 | 317.5  | 1.43 | 283.1  | 1.27 | 231.7  | 1.04 |
| Q6PK18   | 2-oxoglutarate and iron-dependent dioxygenase   | 16.9   | 22.6   | 1.34 | 16.8   | 0.99 | 10.6   | 0.63 | 16.8   | 0.99 | 17.5   | 1.04 | 22.5   | 1.33 | 17.3   | 1.02 |
| B2R6U9   | Delta-like protein OS=Homo sapiens              | 856.5  | 760.5  | 0.89 | 673    | 0.79 | 681.9  | 0.80 | 773.3  | 0.90 | 799    | 0.93 | 730.2  | 0.85 | 685.2  | 0.80 |
| O94985   | Calsynenin-1 OS=Homo sapiens                    | 316.3  | 369.1  | 1.17 | 348.3  | 1.10 | 362.2  | 1.15 | 317.9  | 1.01 | 351.9  | 1.11 | 320.1  | 1.01 | 299.6  | 0.95 |
| O95196   | Chondroitin sulfate proteoglycan 2              | 103.8  | 97.4   | 0.94 | 99.4   | 0.96 | 71.7   | 0.69 | 97.3   | 0.94 | 87.8   | 0.85 | 100.5  | 0.97 | 91     | 0.88 |
| B4DJ06   | cDNA FLJ56620 OS=Homo sapiens                   | 626.6  | 625    | 1.00 | 596.7  | 0.95 | 514.3  | 0.82 | 607.2  | 0.97 | 615.8  | 0.98 | 661.2  | 1.06 | 602.6  | 0.96 |
| Q9UM47   | Neurogenic locus notch homolog protein 1        | 65.6   | 77.9   | 1.19 | 56.7   | 0.86 | 56.7   | 0.86 | 63.1   | 0.96 | 64.2   | 0.98 | 55.7   | 0.85 | 59.5   | 0.91 |
| Q9UL82   | Myosin-reactive immunoglobulin-like domain      | 916.9  | 743.1  | 0.81 | 1333.8 | 1.45 | 663.3  | 0.72 | 916.6  | 1.00 | 800    | 0.87 | 1182.3 | 1.29 | 1116.4 | 1.22 |
| Q12929   | Epidermal growth factor receptor                | 99.3   | 155.1  | 1.56 | 115.3  | 1.16 | 95.4   | 0.96 | 125    | 1.26 | 132.6  | 1.34 | 137.4  | 1.38 | 107    | 1.08 |
| Q86VB7   | Scavenger receptor cysteine-rich type 1 protein | 313    | 412.1  | 1.32 | 419    | 1.34 | 271.5  | 0.87 | 341.3  | 1.09 | 329.9  | 1.05 | 317.9  | 1.02 | 385.1  | 1.23 |
| A0A024RC | Desmocollin 3, isoform CR1                      | 207.8  | 188.6  | 0.91 | 189.1  | 0.91 | 144.7  | 0.70 | 204    | 0.98 | 213.5  | 1.03 | 188.5  | 0.91 | 171.5  | 0.83 |
| A8K144   | cDNA FLJ76746, highly similar to                | 882.3  | 930.9  | 1.06 | 848.6  | 0.96 | 1135.9 | 1.29 | 842.5  | 0.95 | 861.5  | 0.98 | 991.5  | 1.12 | 634.4  | 0.72 |
| A0A125U0 | GCT-A2 heavy chain variable region              | 115.8  | 140.8  | 1.22 | 103.1  | 0.89 | 176.5  | 1.52 | 110.8  | 0.96 | 113.3  | 0.98 | 132    | 1.14 | 112.7  | 0.97 |
| A0A024RC | CD99 antigen-like 2, isoform 1                  | 94.6   | 161.6  | 1.71 | 144.2  | 1.52 | 84.6   | 0.89 | 120.6  | 1.27 | 104.1  | 1.10 | 107.1  | 1.13 | 112    | 1.18 |
| O15144   | Actin-related protein 2/3 complex subunit 1     | 87     | 96.8   | 1.11 | 118.4  | 1.36 | 58.1   | 0.67 | 97.7   | 1.12 | 91.1   | 1.05 | 119.6  | 1.37 | 70.8   | 0.81 |
| Q6UW14   | Protein shisa-2 homolog OS=Homo sapiens         | 160.1  | 202.1  | 1.26 | 167.2  | 1.04 | 173.4  | 1.08 | 150.2  | 0.94 | 163    | 1.02 | 165.9  | 1.04 | 158.3  | 0.99 |
| Q9UL75   | Myosin-reactive immunoglobulin-like domain      | 216.4  | 204    | 0.94 | 157.4  | 0.73 | 158.5  | 0.73 | 196.9  | 0.91 | 212.6  | 0.98 | 186.8  | 0.86 | 210.6  | 0.97 |
| Q6UXB4   | C-type lectin domain family 10, member C        | 2672   | 2538.5 | 0.95 | 2606.1 | 0.98 | 2702.7 | 1.01 | 2706.2 | 1.01 | 2743.9 | 1.03 | 2656.2 | 0.99 | 2493.7 | 0.93 |
| P06734   | Low affinity immunoglobulin gamma 1 chain       | 203.8  | 267.8  | 1.31 | 227.4  | 1.12 | 167.2  | 0.82 | 234.7  | 1.15 | 236.7  | 1.16 | 250.8  | 1.23 | 192.1  | 0.94 |
| P99999   | Cytochrome c OS=Homo sapiens                    | 193.2  | 201.5  | 1.04 | 149.1  | 0.77 | 130.2  | 0.67 | 175.2  | 0.91 | 218.2  | 1.13 | 205    | 1.06 | 198.7  | 1.03 |
| Q59EB6   | Complement component 1, type 1                  | 115.4  | 109    | 0.94 | 111.3  | 0.96 | 89.9   | 0.78 | 107.9  | 0.94 | 112.1  | 0.97 | 108.5  | 0.94 | 107.6  | 0.93 |
| A0A087WY | Proline-rich protein 4 OS=Homo sapiens          | 379.1  | 479.1  | 1.26 | 437.1  | 1.15 | 306.2  | 0.81 | 521.4  | 1.38 | 446.1  | 1.18 | 479.8  | 1.27 | 579.7  | 1.53 |
| P55786   | Puromycin-sensitive aminopyrimidinase           | 23.7   | 36.4   | 1.54 | 23     | 0.97 | 20.8   | 0.88 | 29.7   | 1.25 | 24.1   | 1.02 | 32.9   | 1.39 | 19.7   | 0.83 |
| P08253   | 72 kDa type IV collagenase                      | 397.7  | 450.4  | 1.13 | 374.4  | 0.94 | 319.4  | 0.80 | 455.1  | 1.14 | 467.9  | 1.18 | 427.8  | 1.08 | 440.5  | 1.11 |
| A0A0X9US | MS-A6 heavy chain variable region               | 89     | 112.7  | 1.27 | 93.7   | 1.05 | 128    | 1.44 | 95.1   | 1.07 | 93.6   | 1.05 | 99.8   | 1.12 | 83.3   | 0.94 |
| P05026   | Sodium/potassium-transporting ATPase            | 330.7  | 356.5  | 1.08 | 377.7  | 1.14 | 234.5  | 0.71 | 333.6  | 1.01 | 337    | 1.02 | 348.8  | 1.05 | 260.5  | 0.79 |
| A0A0C4DH | Protein IGHV3-35 (Fragment)                     | 655.5  | 675.8  | 1.03 | 478.8  | 0.73 | 693.6  | 1.06 | 631.1  | 0.96 | 625.7  | 0.95 | 519.5  | 0.79 | 629.1  | 0.96 |
| P49908   | Selenoprotein P OS=Homo sapiens                 | 1007.4 | 877.6  | 0.87 | 810.3  | 0.80 | 674.7  | 0.67 | 816.2  | 0.81 | 890.8  | 0.88 | 881.1  | 0.87 | 832.8  | 0.83 |
| A0A0A0MT | Protein IGKJ4 (Fragment)                        | 836.2  | 890.9  | 1.07 | 947.2  | 1.13 | 637.4  | 0.76 | 760    | 0.91 | 1080   | 1.29 | 920.6  | 1.10 | 710.9  | 0.85 |
| Q14210   | Lymphocyte antigen 6D OS=Homo sapiens           | 834.8  | 892.2  | 1.07 | 1131.4 | 1.36 | 695.9  | 0.83 | 1037.5 | 1.24 | 1030.1 | 1.23 | 1101.4 | 1.32 | 710.4  | 0.85 |
| Q59ER5   | WD repeat-containing protein 1                  | 59.9   | 103.8  | 1.73 | 59.3   | 0.99 | 55.6   | 0.93 | 64.5   | 1.08 | 74.1   | 1.24 | 90.3   | 1.51 | 65.6   | 1.10 |
| B3KTG0   | cDNA FLJ38180 fis, clone                        | 36.2   | 41.2   | 1.14 | 32.3   | 0.89 | 46.7   | 1.29 | 36.6   | 1.01 | 44.9   | 1.24 | 47     | 1.30 | 32.5   | 0.90 |
| A2N2F4   | VK3 protein (Fragment) OS=Homo sapiens          | 285.9  | 254.5  | 0.89 | 491.3  | 1.72 | 198.9  | 0.70 | 269.7  | 0.94 | 305.8  | 1.07 | 289.6  | 1.01 | 279.5  | 0.98 |
| A0A193CH | I0E8 light chain variable region                | 444    | 372.6  | 0.84 | 422.7  | 0.95 | 502.2  | 1.13 | 415.8  | 0.94 | 365.1  | 0.82 | 544.3  | 1.23 | 476.1  | 1.07 |
| Q9Y4L1   | Hypoxia up-regulated protein 1                  | 20.5   | 22.8   | 1.11 | 15.6   | 0.76 | 24.1   | 1.18 | 15.4   | 0.75 | 20.8   | 1.01 | 19.8   | 0.97 | 16.2   | 0.79 |
| P27930   | Interleukin-1 receptor type 2                   | 2      |        |      |        |      |        |      |        |      |        |      |        |      |        |      |
| A8K6C9   | cDNA FLJ78037, highly similar to                | 272.2  | 240.9  | 0.89 | 365.4  | 1.34 | 149    | 0.55 | 244.8  | 0.90 | 221.6  | 0.81 | 240.3  | 0.88 | 301    | 1.11 |
| A0A140VK | Transaldolase OS=Homo sapiens                   | 211    | 292.6  | 1.39 | 233.8  | 1.11 | 171.3  | 0.81 | 269.6  | 1.28 | 253    | 1.20 | 318.9  | 1.51 | 364.6  | 1.73 |
| P37802   | Transgelin-2 OS=Homo sapiens                    | 116.5  | 141.4  | 1.21 | 104.2  | 0.89 | 169.7  | 1.46 | 130.8  | 1.12 | 138.6  | 1.19 | 125.8  | 1.08 | 143.9  | 1.24 |
| Q9UQN3   | Charged multivesicular body protein             | 188.2  | 234.2  | 1.24 | 189.7  | 1.01 | 168.8  | 0.90 | 214.4  | 1.14 | 206.1  | 1.10 | 235.6  | 1.25 | 156.6  | 0.83 |
| B2R4F3   | cDNA, FLJ92068, highly similar to               | 117.3  | 168.2  | 1.43 | 99.1   | 0.84 | 95.3   | 0.81 | 132.3  | 1.13 | 118.3  | 1.01 | 126.8  | 1.08 | 143.1  | 1.22 |
| J3QRS3   | Myosin regulatory light chain 2                 | 35.4   | 42.5   | 1.20 | 39.1   | 1.10 | 23.9   | 0.68 | 31     | 0.88 | 30.9   | 0.87 | 40.9   | 1.16 | 39.6   | 1.12 |
| Q96QS0   | Putative matrix cell adhesion molecule          | 126.5  | 120.8  | 0.95 | 106.1  | 0.84 | 111.5  | 0.88 | 106.1  | 0.84 | 125    | 0.99 | 105.8  | 0.84 | 131    | 1.04 |
| P18428   | Lipopolysaccharide-binding protein              | 258    | 352    | 1.36 | 289.9  | 1.12 | 263    | 1.02 | 288.8  | 1.12 | 340.7  | 1.32 | 328    | 1.27 | 428.6  | 1.66 |
| P98161   | Polycystin-1 OS=Homo sapiens                    | 161.1  | 180.8  | 1.12 | 161.5  | 1.00 | 151.3  | 0.94 | 154.8  | 0.96 | 161.3  | 1.00 | 156.1  | 0.97 | 133.4  | 0.83 |
| Q14112   | Nidogen-2 OS=Homo sapiens                       | 113.6  | 136.9  | 1.21 | 111    | 0.98 | 115.9  | 1.02 | 117.9  | 1.04 | 105    | 0.92 | 110.9  | 0.98 | 102    | 0.90 |
| A0A1B1CY | Vitamin D binding protein (Fragment)            | 346.4  | 504.5  | 1.46 | 309.5  | 0.89 | 867.1  | 2.50 | 484.5  | 1.40 | 320.7  | 0.93 | 325.4  | 0.94 | 236.3  | 0.68 |
| I3L504   | Eukaryotic translation initiation factor 4E     | 170.1  | 246.8  | 1.45 | 234.1  | 1.38 | 145.1  | 0.85 | 217.5  | 1.28 | 209.8  | 1.23 | 214.1  | 1.26 | 171.6  | 1.01 |
| Q53HU8   | Vimentin variant (Fragment)                     | 35.3   | 52.8   | 1.50 | 36.1   | 1.02 | 30.6   | 0.87 | 31.6   | 0.90 | 31.1   | 0.88 | 40.4   | 1.14 | 39.4   | 1.12 |
| Q8TBP5   | Membrane protein FAM174                         | 157.3  | 147.6  | 0.94 | 111    | 0.71 | 106.1  | 0.67 | 153.3  | 0.97 | 148.7  | 0.95 | 138.3  | 0.88 | 127.4  | 0.81 |
| B2R6W4   | cDNA, FLJ93149, highly similar to               | 394.5  | 389.3  | 0.99 | 514.4  | 1.30 | 297.3  | 0.75 | 432.2  | 1.10 | 419.4  | 1.06 | 394.1  | 1.00 | 333.2  | 0.84 |
| V6A6E5   | MHC class I antigen OS=Homo sapiens             | 78.4   | 74.1   | 0.95 | 88.9   | 1.13 | 64.2   | 0.82 | 84.8   | 1.08 | 76.4   | 0.97 | 82.1   | 1.05 | 65.1   | 0.83 |
| P82980   | Retinol-binding protein 5 OS=Homo sapiens       | 701.1  | 757.5  | 1.08 | 632    | 0.90 | 453.8  | 0.65 | 676.4  | 0.96 | 864.8  | 1.23 | 746.1  | 1.06 | 595.4  | 0.85 |



|           |                                |        |        |      |        |      |       |      |        |      |       |      |        |      |        |      |
|-----------|--------------------------------|--------|--------|------|--------|------|-------|------|--------|------|-------|------|--------|------|--------|------|
| A0A0X9T71 | MS-A6 light chain variable     | 54.3   | 72.9   | 1.34 | 60.7   | 1.12 | 55.9  | 1.03 | 58.5   | 1.08 | 52.7  | 0.97 | 68.7   | 1.27 | 54.3   | 1.00 |
| F8RHH9    | MHC class I antigen (Fragm     |        |        |      |        |      |       |      |        |      |       |      |        |      |        |      |
| Q14117    | Dihydropyrimidinase OS=H       | 130.9  | 201.8  | 1.54 | 141.6  | 1.08 | 111   | 0.85 | 138.3  | 1.06 | 209.1 | 1.60 | 172.8  | 1.32 | 124.8  | 0.95 |
| P19256    | Lymphocyte function-associ     | 773.2  | 776.7  | 1.00 | 626.6  | 0.81 | 595.5 | 0.77 | 697.1  | 0.90 | 721.6 | 0.93 | 753.2  | 0.97 | 653.8  | 0.85 |
| Q86XT2    | Vacuolar protein sorting-ass   | 66     | 58.7   | 0.89 | 62.4   | 0.95 | 53.8  | 0.82 | 65.6   | 0.99 | 69.1  | 1.05 | 61.2   | 0.93 | 66     | 1.00 |
| D2IYL2    | Corneodesmosin OS=Homo         | 415    | 520.3  | 1.25 | 544.5  | 1.31 | 442.9 | 1.07 | 475.2  | 1.15 | 444.8 | 1.07 | 430.4  | 1.04 | 364.4  | 0.88 |
| Q5HYL0    | Putative uncharacterized prc   | 48.9   | 51.4   | 1.05 | 49.3   | 1.01 | 38.6  | 0.79 | 41     | 0.84 | 49.9  | 1.02 | 28.4   | 0.58 | 32.2   | 0.66 |
| Q6UWV6    | Ectonucleotide pyrophosph      | 193.3  | 219.4  | 1.14 | 157.8  | 0.82 | 192.7 | 1.00 | 178.4  | 0.92 | 197.1 | 1.02 | 172.8  | 0.89 | 150.7  | 0.78 |
| K7ES00    | Histone H3.3 (Fragment) O      | 602.6  | 1428.3 | 2.37 | 1016.6 | 1.69 | 681.7 | 1.13 | 754.7  | 1.25 | 827.1 | 1.37 | 1406.8 | 2.33 | 1900.6 | 3.15 |
| Q8NC54    | Keratinocyte-associated tran   | 485.1  | 490.9  | 1.01 | 422.4  | 0.87 | 421.1 | 0.87 | 420.2  | 0.87 | 493.8 | 1.02 | 456.3  | 0.94 | 497.4  | 1.03 |
| P15907    | Beta-galactoside alpha-2,6-s   | 75.5   | 91.2   | 1.21 | 67.6   | 0.90 | 79.4  | 1.05 | 77.6   | 1.03 | 75.9  | 1.01 | 104.5  | 1.38 | 67.3   | 0.89 |
| P22223    | Cadherin-3 OS=Homo sapi        |        |        |      |        |      |       |      |        |      |       |      |        |      |        |      |
| A0A0X9TD  | GCT-A3 heavy chain variab      |        |        |      |        |      |       |      |        |      |       |      |        |      |        |      |
| Q96MM7    | Heparan-sulfate 6-O-sulfotr    | 94.5   | 138.9  | 1.47 | 122    | 1.29 | 121   | 1.28 | 106.4  | 1.13 | 117.8 | 1.25 | 127.9  | 1.35 | 89.3   | 0.94 |
| P25774    | Cathepsin S OS=Homo sapi       | 115.9  | 108.5  | 0.94 | 98.8   | 0.85 | 80.5  | 0.69 | 87.4   | 0.75 | 102.4 | 0.88 | 121.4  | 1.05 | 97.5   | 0.84 |
| P19075    | Tetraspanin-8 OS=Homo sa       | 182    | 207.2  | 1.14 | 165.4  | 0.91 | 218   | 1.20 | 182.1  | 1.00 | 194   | 1.07 | 130.4  | 0.72 | 138.4  | 0.76 |
| B3KT21    | cDNA FLJ37476 fis, clone       | 99.1   | 92.6   | 0.93 | 74.3   | 0.75 | 70.6  | 0.71 | 75.1   | 0.76 | 87.6  | 0.88 | 100.3  | 1.01 | 74.6   | 0.75 |
| V9HW80    | Epididymis luminal protein     |        |        |      |        |      |       |      |        |      |       |      |        |      |        |      |
| Q9BS26    | Endoplasmic reticulum resc     | 229.6  | 243    | 1.06 | 228.2  | 0.99 | 158.4 | 0.69 | 204.3  | 0.89 | 229.6 | 1.00 | 239.3  | 1.04 | 208.1  | 0.91 |
| Q6FGQ5    | ASGR1 protein (Fragment)       | 266.7  | 229.7  | 0.86 | 206.2  | 0.77 | 158.4 | 0.59 | 233.7  | 0.88 | 247.8 | 0.93 | 269.9  | 1.01 | 231.5  | 0.87 |
| A8K243    | cDNA FLJ78172, highly sin      | 55     | 78.2   | 1.42 | 45.5   | 0.83 | 62.4  | 1.13 | 50.4   | 0.92 | 55    | 1.00 | 57.2   | 1.04 | 40.8   | 0.74 |
| P22748    | Carbonic anhydrase 4 OS=I      | 300.4  | 335.3  | 1.12 | 298.2  | 0.99 | 233.2 | 0.78 | 357.8  | 1.19 | 421.7 | 1.40 | 312.2  | 1.04 | 296.8  | 0.99 |
| B4DW34    | cDNA FLJ56798, highly sin      | 44.2   | 49.7   | 1.12 | 38.2   | 0.86 | 44.3  | 1.00 | 47.3   | 1.07 | 42    | 0.95 | 52     | 1.18 | 40.8   | 0.92 |
| Q9UN66    | Protocadherin beta-8 OS=H      | 45.3   | 45     | 0.99 | 31     | 0.68 | 49.9  | 1.10 | 33.1   | 0.73 | 40.7  | 0.90 | 41.5   | 0.92 | 31.4   | 0.69 |
| A4D1W8    | Ependymin related protein 1    | 403.7  | 406.2  | 1.01 | 412.1  | 1.02 | 301.2 | 0.75 | 360.1  | 0.89 | 393.5 | 0.97 | 365.2  | 0.90 | 408.3  | 1.01 |
| O43488    | Aflatoxin B1 aldehyde redu     | 18.6   | 24.5   | 1.32 | 21.3   | 1.15 | 15.4  | 0.83 | 15.7   | 0.84 | 27    | 1.45 | 23.8   | 1.28 | 15.2   | 0.82 |
| Q8WWZ8    | Oncoprotein-induced trans      | 90.4   | 130.7  | 1.45 | 103.9  | 1.15 | 78.8  | 0.87 | 104.1  | 1.15 | 90.5  | 1.00 | 106.3  | 1.18 | 102.2  | 1.13 |
| B2R7D1    | cDNA, FLJ93387, highly sin     | 39.4   | 55.5   | 1.41 | 20.2   | 0.51 | 47.3  | 1.20 | 39.5   | 1.00 | 47.6  | 1.21 | 23     | 0.58 | 17.2   | 0.44 |
| Q9BUD6    | Spondin-2 OS=Homo sapi         | 86.9   | 84.6   | 0.97 | 153    | 1.76 | 94.8  | 1.09 | 94.6   | 1.09 | 108.7 | 1.25 | 72.1   | 0.83 | 73     | 0.84 |
| B5MCA4    | Epithelial cell adhesion mol   |        |        |      |        |      |       |      |        |      |       |      |        |      |        |      |
| A0AVF1    | Intraflagellar transport prote | 1223.2 | 989.9  | 0.81 | 1068.8 | 0.87 | 738.7 | 0.60 | 1308.1 | 1.07 | 1250  | 1.02 | 1127.4 | 0.92 | 850.5  | 0.70 |
| Q9NZV1    | Cysteine-rich motor neuron     | 79.9   | 75.1   | 0.94 | 85.6   | 1.07 | 67.2  | 0.84 | 89.7   | 1.12 | 82.2  | 1.03 | 96.3   | 1.21 | 66.9   | 0.84 |
| Q86X29    | Lipolysis-stimulated lipopro   | 57.1   | 69.9   | 1.22 | 72.6   | 1.27 | 58.2  | 1.02 | 69     | 1.21 | 77    | 1.35 | 56     | 0.98 | 62.5   | 1.09 |
| A0A024R88 | ATPase, H+ transporting, ly    | 71.8   | 99.1   | 1.38 | 83.5   | 1.16 | 70.3  | 0.98 | 98.9   | 1.38 | 90.4  | 1.26 | 82.9   | 1.15 | 71.4   | 0.99 |
| P49767    | Vascular endothelial growth    |        |        |      |        |      |       |      |        |      |       |      |        |      |        |      |
| A0A024R17 | Leukotriene B4 12-hydroxy      | 62.7   | 77.5   | 1.24 | 61.8   | 0.99 | 51.5  | 0.82 | 61.2   | 0.98 | 64.7  | 1.03 | 58.9   | 0.94 | 63.2   | 1.01 |
| A1L471    | ATP-binding cassette, sub-f    | 121    | 125.8  | 1.04 | 86.1   | 0.71 | 96.3  | 0.80 | 96.5   | 0.80 | 119.6 | 0.99 | 123.2  | 1.02 | 74     | 0.61 |
| A8K2T7    | Receptor protein-tyrosine ki   |        |        |      |        |      |       |      |        |      |       |      |        |      |        |      |
| V9HW55    | Proteasome endopeptidase c     | 211.7  | 260.2  | 1.23 | 296.6  | 1.40 | 189.1 | 0.89 | 259.1  | 1.22 | 262.2 | 1.24 | 247.5  | 1.17 | 244    | 1.15 |
| P03950    | Angiogenin OS=Homo sapi        | 422.6  | 404.3  | 0.96 | 446.7  | 1.06 | 333   | 0.79 | 406.2  | 0.96 | 389.5 | 0.92 | 423.6  | 1.00 | 441.8  | 1.05 |
| A0A0S2Z4E | Solute carrier family 3 (Cys   | 54.8   | 80.7   | 1.47 | 62.9   | 1.15 | 44.2  | 0.81 | 61.5   | 1.12 | 64    | 1.17 | 57.6   | 1.05 | 55.3   | 1.01 |
| Q03167    | Transforming growth factor     | 66     | 97.9   | 1.48 | 80.6   | 1.22 | 58.7  | 0.89 | 84.1   | 1.27 | 80.2  | 1.22 | 93.4   | 1.42 | 88.1   | 1.33 |
| C9IY11    | Dermokine OS=Homo sapi         |        |        |      |        |      |       |      |        |      |       |      |        |      |        |      |
| H7C215    | Reticulon-4 receptor (Fragm    | 96.5   | 93.9   | 0.97 | 111    | 1.15 | 89.7  | 0.93 | 97.2   | 1.01 | 106.2 | 1.10 | 102.9  | 1.07 | 87     | 0.90 |
| P55107    | Growth/differentiation facto   | 234.2  | 219.7  | 0.94 | 161.8  | 0.69 | 160.6 | 0.69 | 172.8  | 0.74 | 181.2 | 0.77 | 183.7  | 0.78 | 155    | 0.66 |
| P14784    | Interleukin-2 receptor subun   | 188.2  | 179.6  | 0.95 | 170.7  | 0.91 | 131.8 | 0.70 | 161.9  | 0.86 | 159.9 | 0.85 | 177.7  | 0.94 | 149.1  | 0.79 |
| V9HWH1    | Epididymis luminal protein     | 59.9   | 86.5   | 1.44 | 65.8   | 1.10 | 58.1  | 0.97 | 85.4   | 1.43 | 68.1  | 1.14 | 78.1   | 1.30 | 76.8   | 1.28 |
| O43405    | Cochlin OS=Homo sapiens        | 452.5  | 346.4  | 0.77 | 511.1  | 1.13 | 275.7 | 0.61 | 415    | 0.92 | 442.1 | 0.98 | 351.6  | 0.78 | 386.2  | 0.85 |
| A0A1B0GW  | Alpha-aminoadipic semialde     | 23.3   | 31     | 1.33 | 29.2   | 1.25 | 24.1  | 1.03 | 23.1   | 0.99 | 24.2  | 1.04 | 34.6   | 1.48 | 25.3   | 1.09 |
| F2RM35    | Serine protease OS=Homo s      |        |        |      |        |      |       |      |        |      |       |      |        |      |        |      |
| Q9NR34    | Mannosyl-oligosaccharide 1     |        |        |      |        |      |       |      |        |      |       |      |        |      |        |      |
| O00299    | Chloride intracellular chann   | 80     | 104.1  | 1.30 | 95.7   | 1.20 | 71.5  | 0.89 | 94.6   | 1.18 | 102.6 | 1.28 | 87.8   | 1.10 | 80.7   | 1.01 |
| A0A024R9E | Mal, T-cell differentiation p  | 104    | 132    | 1.27 | 109.8  | 1.06 | 84.5  | 0.81 | 94     | 0.90 | 101.7 | 0.98 | 107.9  | 1.04 | 88.7   | 0.85 |
| P31150    | Rab GDP dissociation inhib     | 91.8   | 114.8  | 1.25 | 83.7   | 0.91 | 86.9  | 0.95 | 103.1  | 1.12 | 99.2  | 1.08 | 109    | 1.19 | 78     | 0.85 |
| A0A024R31 | Laminin, beta 2 (Laminin S)    | 122.5  | 134.8  | 1.10 | 142.9  | 1.17 | 111   | 0.91 | 114.4  | 0.93 | 122.6 | 1.00 | 150.8  | 1.23 | 107.1  | 0.87 |
| B2R7N9    | cDNA, FLJ93532, highly sin     | 309.7  | 338.1  | 1.09 | 349.5  | 1.13 | 238.1 | 0.77 | 343.8  | 1.11 | 309.6 | 1.00 | 357.4  | 1.15 | 319.5  | 1.03 |
| P01704    | Immunoglobulin lambda var      | 246.2  | 304.8  | 1.24 | 454.4  | 1.85 | 233   | 0.95 | 303.9  | 1.23 | 281.4 | 1.14 | 342.4  | 1.39 | 229.9  | 0.93 |
| Q8N126    | Cell adhesion molecule 3 O     | 80.7   | 73.7   | 0.91 | 95.3   | 1.18 | 77.6  | 0.96 | 79.7   | 0.99 | 78.2  | 0.97 | 95.7   | 1.19 | 96.6   | 1.20 |

|           |                               |       |       |      |        |      |       |      |        |      |        |      |        |      |        |      |
|-----------|-------------------------------|-------|-------|------|--------|------|-------|------|--------|------|--------|------|--------|------|--------|------|
| A0A0X9V9  | IBM-B2 light chain variable   | 293.4 | 266.4 | 0.91 | 237.5  | 0.81 | 191.9 | 0.65 | 303.4  | 1.03 | 357.1  | 1.22 | 284.3  | 0.97 | 328.7  | 1.12 |
| Q9HBJ8    | Collectrin OS=Homo sapien     | 94    | 109.6 | 1.17 | 79.1   | 0.84 | 82.2  | 0.87 | 100.7  | 1.07 | 125.9  | 1.34 | 115.8  | 1.23 | 83.4   | 0.89 |
| Q86UZ8    | FZD2 protein (Fragment) O     | 609.8 | 550.6 | 0.90 | 579.5  | 0.95 | 371.6 | 0.61 | 612.1  | 1.00 | 620.5  | 1.02 | 612.7  | 1.00 | 574.2  | 0.94 |
| H3BQD0    | Cerebellin-1 OS=Homo sap      | 333   | 317.7 | 0.95 | 722.6  | 2.17 | 197   | 0.59 | 399.5  | 1.20 | 338.3  | 1.02 | 205.1  | 0.62 | 329.1  | 0.99 |
| Q96MU8    | Kremen protein 1 OS=Hom       | 27.5  | 48.9  | 1.78 | 33.9   | 1.23 | 29.8  | 1.08 | 33.6   | 1.22 | 29     | 1.05 | 33.5   | 1.22 | 27.3   | 0.99 |
| P58546    | Myotrophin OS=Homo sapi       | 58.6  | 53.1  | 0.91 | 55.5   | 0.95 | 41.4  | 0.71 | 55.5   | 0.95 | 60.5   | 1.03 | 59.3   | 1.01 | 66.4   | 1.13 |
| P22304    | Iduronate 2-sulfatase OS=H    | 123.9 | 142.9 | 1.15 | 111.3  | 0.90 | 112.3 | 0.91 | 119.5  | 0.96 | 122.3  | 0.99 | 122.3  | 0.99 | 114.7  | 0.93 |
| B3KNV8    | Polypeptide N-acetylgalacto   | 143.7 | 157.5 | 1.10 | 140.2  | 0.98 | 128.1 | 0.89 | 159.4  | 1.11 | 206.1  | 1.43 | 178    | 1.24 | 126.5  | 0.88 |
| O75787    | Renin receptor OS=Homo s      | 450.3 | 973.9 | 2.16 | 474.6  | 1.05 | 387.6 | 0.86 | 490.8  | 1.09 | 579.7  | 1.29 | 599.7  | 1.33 | 413.1  | 0.92 |
| Q5T7S2    | Receptor protein serine/thre  |       |       |      |        |      |       |      |        |      |        |      |        |      |        |      |
| O75071    | EF-hand calcium-binding dc    | 337.1 | 330.6 | 0.98 | 300.4  | 0.89 | 204.3 | 0.61 | 311.9  | 0.93 | 342.7  | 1.02 | 292.9  | 0.87 | 321.9  | 0.95 |
| D2JYI1    | TGF-beta receptor type-2 O    | 55.8  | 75.2  | 1.35 | 79.8   | 1.43 | 66    | 1.18 | 58     | 1.04 | 57.9   | 1.04 | 57.7   | 1.03 | 60.7   | 1.09 |
| P04118    | Colipase OS=Homo sapiens      | 777.9 | 838.9 | 1.08 | 902.8  | 1.16 | 513.9 | 0.66 | 804.5  | 1.03 | 1277.9 | 1.64 | 865.7  | 1.11 | 738.1  | 0.95 |
| O43567    | E3 ubiquitin-protein ligase F | 675   | 649.5 | 0.96 | 599.2  | 0.89 | 425.8 | 0.63 | 697.7  | 1.03 | 681.4  | 1.01 | 632.1  | 0.94 | 715.8  | 1.06 |
| A0A0G2JN4 | Mucin-6 OS=Homo sapiens       |       |       |      |        |      |       |      |        |      |        |      |        |      |        |      |
| Q13790    | Apolipoprotein F OS=Hom       | 235.1 | 161   | 0.68 | 116.9  | 0.50 | 111   | 0.47 | 115    | 0.49 | 175.3  | 0.75 | 183    | 0.78 | 196.6  | 0.84 |
| Q9H9P2    | Chondrolectin OS=Homo sa      | 15.2  | 13.6  | 0.89 | 10.7   | 0.70 | 10.2  | 0.67 | 9.1    | 0.60 | 12.1   | 0.80 | 13.9   | 0.91 | 13.3   | 0.88 |
| P08887    | Interleukin-6 receptor subun  | 57.9  | 65.3  | 1.13 | 66.6   | 1.15 | 55.5  | 0.96 | 67.5   | 1.17 | 58.2   | 1.01 | 74.7   | 1.29 | 61.2   | 1.06 |
| A0A024RA1 | Calpastatin, isoform CRA_a    |       |       |      |        |      |       |      |        |      |        |      |        |      |        |      |
| Q6UWH4    | Protein FAM198B OS=Hon        | 373.9 | 323.8 | 0.87 | 311.7  | 0.83 | 325.3 | 0.87 | 464.7  | 1.24 | 424.6  | 1.14 | 365.6  | 0.98 | 310.8  | 0.83 |
| B2RDY9    | Adenylyl cyclase-associated   | 273.4 | 218   | 0.80 | 156.3  | 0.57 | 174.4 | 0.64 | 161.1  | 0.59 | 153.9  | 0.56 | 175.6  | 0.64 | 157.4  | 0.58 |
| A0A087X0I | Growth hormone receptor O     | 105.8 | 111.5 | 1.05 | 87.9   | 0.83 | 75    | 0.71 | 90.5   | 0.86 | 99.4   | 0.94 | 101.9  | 0.96 | 99     | 0.94 |
| P51606    | N-acylglucosamine 2-epime     | 55.8  | 88.6  | 1.59 | 67.2   | 1.20 | 88.8  | 1.59 | 73.3   | 1.31 | 70.8   | 1.27 | 73.7   | 1.32 | 51.2   | 0.92 |
| P27824    | Calnexin OS=Homo sapiens      | 29.3  | 30.4  | 1.04 | 34.9   | 1.19 | 38.5  | 1.31 | 26.9   | 0.92 | 26.2   | 0.89 | 31.8   | 1.09 | 29.9   | 1.02 |
| B2RAN2    | cDNA, FLJ95014, highly sim    | 235.9 | 354.5 | 1.50 | 285.9  | 1.21 | 320.7 | 1.36 | 249.9  | 1.06 | 274.4  | 1.16 | 243.3  | 1.03 | 262.6  | 1.11 |
| Q9UGM5    | Fetuin-B OS=Homo sapiens      | 93.5  | 140   | 1.50 | 114.8  | 1.23 | 112.9 | 1.21 | 118.9  | 1.27 | 111.8  | 1.20 | 131.1  | 1.40 | 125.2  | 1.34 |
| B9EKV4    | Aldehyde dehydrogenase 9      | 11.7  | 20.2  | 1.73 | 9.8    | 0.84 | 16.8  | 1.44 | 12.6   | 1.08 | 16.9   | 1.44 | 13.9   | 1.19 | 10.9   | 0.93 |
| P78310    | Coxsackievirus and adenovi    | 31.6  | 47.1  | 1.49 | 37.6   | 1.19 | 35.6  | 1.13 | 40     | 1.27 | 38.2   | 1.21 | 27.4   | 0.87 | 31.1   | 0.98 |
| O75074    | Low-density lipoprotein rec   | 218.8 | 189.3 | 0.87 | 150.2  | 0.69 | 159.1 | 0.73 | 185.1  | 0.85 | 210.7  | 0.96 | 203.7  | 0.93 | 194.8  | 0.89 |
| Q0VDC6    | Peptidylprolyl isomerase OS   | 33.7  | 35.3  | 1.05 | 33.8   | 1.00 | 40.5  | 1.20 | 34.5   | 1.02 | 35     | 1.04 | 37.7   | 1.12 | 38.2   | 1.13 |
| A8K5Y2    | cDNA FLJ77228, highly sim     | 420.4 | 405.2 | 0.96 | 432    | 1.03 | 309.4 | 0.74 | 414.4  | 0.99 | 409.5  | 0.97 | 361.2  | 0.86 | 330.4  | 0.79 |
| Q96FE5    | Leucine-rich repeat and imm   | 587.4 | 521.7 | 0.89 | 476.9  | 0.81 | 443.6 | 0.76 | 523.5  | 0.89 | 515    | 0.88 | 537.2  | 0.91 | 379.8  | 0.65 |
| Q96MG2    | Junctional sarcoplasmic reti  | 262.2 | 258.5 | 0.99 | 272.2  | 1.04 | 176.9 | 0.67 | 234.6  | 0.89 | 310.4  | 1.18 | 225    | 0.86 | 192.1  | 0.73 |
| A8K9U9    | cDNA FLJ75862, highly sim     |       |       |      |        |      |       |      |        |      |        |      |        |      |        |      |
| D6W5K2    | Thymosin, beta 10, isoform    | 878.5 | 1247  | 1.42 | 1089.4 | 1.24 | 536.4 | 0.61 | 1030.5 | 1.17 | 1004.3 | 1.14 | 1341.3 | 1.53 | 1170.9 | 1.33 |
| A0A0B5HR  | Serine/threonine-protein kin  | 128.2 | 117.6 | 0.92 | 109.8  | 0.86 | 106.5 | 0.83 | 123.8  | 0.97 | 133    | 1.04 | 114.8  | 0.90 | 113.3  | 0.88 |
| Q9NWX4    | UPF0587 protein C1orf123      | 206.9 | 259.2 | 1.25 | 373.2  | 1.80 | 182.5 | 0.88 | 221.3  | 1.07 | 246.3  | 1.19 | 177.1  | 0.86 | 199.5  | 0.96 |
| P02545    | Prelamin-A/C OS=Homo sa       | 64.1  | 173.5 | 2.71 | 98.4   | 1.54 | 115.4 | 1.80 | 86     | 1.34 | 73     | 1.14 | 89.4   | 1.39 | 66.8   | 1.04 |
| A4D2P0    | Ras-related C3 botulinum to   | 78.2  | 84.6  | 1.08 | 71     | 0.91 | 71.3  | 0.91 | 84.1   | 1.08 | 105.5  | 1.35 | 82.4   | 1.05 | 93.3   | 1.19 |
| Q86YT9    | Junctional adhesion molecu    | 101.9 | 124.7 | 1.22 | 180    | 1.77 | 88.4  | 0.87 | 138.5  | 1.36 | 122.5  | 1.20 | 103.1  | 1.01 | 101.5  | 1.00 |
| P15529    | Membrane cofactor protein     | 40.8  | 35.9  | 0.88 | 45.1   | 1.11 | 31.2  | 0.76 | 44.7   | 1.10 | 39.4   | 0.97 | 33.8   | 0.83 | 35.4   | 0.87 |
| Q9BYE4    | Small proline-rich protein 2  | 217.1 | 225.5 | 1.04 | 254.8  | 1.17 | 318.1 | 1.47 | 255.2  | 1.18 | 243.8  | 1.12 | 263.5  | 1.21 | 244.6  | 1.13 |
| H7BZJ3    | Protein disulfide-isomerase   |       |       |      |        |      |       |      |        |      |        |      |        |      |        |      |
| B2RC95    | cDNA, FLJ95923, highly sim    | 122.9 | 144.5 | 1.18 | 134.2  | 1.09 | 114.9 | 0.93 | 142.2  | 1.16 | 146.9  | 1.20 | 130    | 1.06 | 120.5  | 0.98 |
| Q9BYJ0    | Fibroblast growth factor-bin  | 64.1  | 58    | 0.90 | 64     | 1.00 | 38.3  | 0.60 | 57.8   | 0.90 | 70.6   | 1.10 | 49.3   | 0.77 | 57.2   | 0.89 |
| Q96PC5    | Melanoma inhibitory activit   | 116.3 | 112.2 | 0.96 | 94.7   | 0.81 | 98.6  | 0.85 | 106.7  | 0.92 | 106.4  | 0.91 | 110.9  | 0.95 | 102.6  | 0.88 |
| Q9UMX5    | Neudesin OS=Homo sapien       | 235.1 | 229.2 | 0.97 | 209.7  | 0.89 | 167.5 | 0.71 | 226.5  | 0.96 | 244.1  | 1.04 | 222.8  | 0.95 | 206.9  | 0.88 |
| Q9Y4I9    | Tyrosine phosphatase IA-2b    | 150.1 | 155.4 | 1.04 | 147.2  | 0.98 | 121.1 | 0.81 | 139.4  | 0.93 | 156.3  | 1.04 | 131.5  | 0.88 | 109    | 0.73 |
| P11234    | Ras-related protein Ral-B O   | 19.1  | 29.3  | 1.53 | 22.5   | 1.18 | 20.2  | 1.06 | 20.2   | 1.06 | 25.2   | 1.32 | 39.8   | 2.08 | 17.4   | 0.91 |
| Q16581    | C3a anaphylatoxin chemota     | 63.4  | 70.9  | 1.12 | 63.9   | 1.01 | 67.8  | 1.07 | 64.7   | 1.02 | 70.1   | 1.11 | 65.3   | 1.03 | 63.1   | 1.00 |
| B2R6S5    | UMP-CMP kinase OS=Hon         | 319.9 | 406.5 | 1.27 | 384.8  | 1.20 | 240.2 | 0.75 | 339.2  | 1.06 | 404    | 1.26 | 438.8  | 1.37 | 308.5  | 0.96 |
| A0A1B1RV  | Lipoprotein lipase OS=Hom     | 56.3  | 80.3  | 1.43 | 60.9   | 1.08 | 70.8  | 1.26 | 74.6   | 1.33 | 80.2   | 1.42 | 69.5   | 1.23 | 64.4   | 1.14 |
| Q59ED5    | Tetraspanin (Fragment) OS-    | 67.4  | 62.9  | 0.93 | 84.1   | 1.25 | 55.4  | 0.82 | 67.3   | 1.00 | 65.1   | 0.97 | 51.7   | 0.77 | 63.2   | 0.94 |
| A8K139    | cDNA FLJ76744, highly sim     | 68    | 96.3  | 1.42 | 73.4   | 1.08 | 67.1  | 0.99 | 72.2   | 1.06 | 85.9   | 1.26 | 68.7   | 1.01 | 69     | 1.01 |
| G3V5Z7    | Proteasome subunit alpha ty   | 106.8 | 170.1 | 1.59 | 150.6  | 1.41 | 125.1 | 1.17 | 142.8  | 1.34 | 125.9  | 1.18 | 146.2  | 1.37 | 113.5  | 1.06 |
| Q8NFU3    | Thiosulfate sulfurtransferase |       |       |      |        |      |       |      |        |      |        |      |        |      |        |      |
| P32241    | Vasoactive intestinal polype  | 35.1  | 40.8  | 1.16 | 43     | 1.23 | 32.2  | 0.92 | 42.1   | 1.20 | 34.4   | 0.98 | 35     | 1.00 | 35.3   | 1.01 |
| Q8IYJ0    | PILR alpha-associated neur    | 120.9 | 128.5 | 1.06 | 124.5  | 1.03 | 84.4  | 0.70 | 124.2  | 1.03 | 117.3  | 0.97 | 122.3  | 1.01 | 89.9   | 0.74 |



|           |                               |       |       |      |        |      |       |      |        |      |        |      |        |      |        |      |
|-----------|-------------------------------|-------|-------|------|--------|------|-------|------|--------|------|--------|------|--------|------|--------|------|
| A0A075B6S | Protein IGKV1-37 (Fragme      | 20.1  | 36.2  | 1.80 | 41.8   | 2.08 | 32.6  | 1.62 | 23.3   | 1.16 | 32     | 1.59 | 39.4   | 1.96 | 25.9   | 1.29 |
| A0A087WY  | Tumor protein D54 OS=Ho       | 215.4 | 266   | 1.23 | 228.2  | 1.06 | 169.7 | 0.79 | 242.9  | 1.13 | 214.3  | 0.99 | 266.8  | 1.24 | 244.4  | 1.13 |
| Q03164    | Histone-lysine N-methyltran   | 606.1 | 472.5 | 0.78 | 2094.7 | 3.46 | 378.3 | 0.62 | 540    | 0.89 | 729.5  | 1.20 | 922.7  | 1.52 | 521.2  | 0.86 |
| P13639    | Elongation factor 2 OS=Ho     |       |       |      |        |      |       |      |        |      |        |      |        |      |        |      |
| O95502    | Neuronal pentraxin receptor   |       |       |      |        |      |       |      |        |      |        |      |        |      |        |      |
| X5D2G8    | Fibroblast growth factor rec  | 237.9 | 316.4 | 1.33 | 228.2  | 0.96 | 256.8 | 1.08 | 255.9  | 1.08 | 249.8  | 1.05 | 294.5  | 1.24 | 206.5  | 0.87 |
| A0A024R3V | Eukaryotic translation elong  |       |       |      |        |      |       |      |        |      |        |      |        |      |        |      |
| Q8WY15    | Sodium/glucose cotransport    |       |       |      |        |      |       |      |        |      |        |      |        |      |        |      |
| C5IX07    | Tumor-associated calcium s    | 127.5 | 130.5 | 1.02 | 115.3  | 0.90 | 103.3 | 0.81 | 129.5  | 1.02 | 127.1  | 1.00 | 125.5  | 0.98 | 120.7  | 0.95 |
| Q9H2A7    | C-X-C motif chemokine 16      |       |       |      |        |      |       |      |        |      |        |      |        |      |        |      |
| A0A075B7I | Protein IGHV1OR15-1 (Fra      |       |       |      |        |      |       |      |        |      |        |      |        |      |        |      |
| I3L0A0    | HCG2044781 OS=Homo se         | 148.5 | 377.8 | 2.54 | 175.7  | 1.18 | 137.8 | 0.93 | 193    | 1.30 | 212.5  | 1.43 | 188.3  | 1.27 | 177.6  | 1.20 |
| Q7L5L3    | Glycerophosphodiester phos    | 11.7  | 18.2  | 1.56 | 12.9   | 1.10 | 10.4  | 0.89 | 9.7    | 0.83 | 12.6   | 1.08 | 16.3   | 1.39 | 15.3   | 1.31 |
| Q9GZP0    | Platelet-derived growth fact  |       |       |      |        |      |       |      |        |      |        |      |        |      |        |      |
| A8K061    | cDNA FLJ77880, highly sin     | 74.5  | 64.3  | 0.86 | 67.7   | 0.91 | 76.5  | 1.03 | 67     | 0.90 | 89.8   | 1.21 | 81.7   | 1.10 | 73.2   | 0.98 |
| O00622    | Protein CYR61 OS=Homo         | 39.4  | 41.8  | 1.06 | 41     | 1.04 | 33.5  | 0.85 | 39.3   | 1.00 | 44.8   | 1.14 | 42.5   | 1.08 | 38     | 0.96 |
| A0A1K0FU  | Globin E1 OS=Homo sapien      | 7.8   | 18.4  | 2.36 | 13.1   | 1.68 | 13.3  | 1.71 | 9.4    | 1.21 | 11     | 1.41 | 19     | 2.44 | 11.2   | 1.44 |
| P10721    | Mast/stem cell growth facto   | 56.5  | 59    | 1.04 | 57.5   | 1.02 | 50.6  | 0.90 | 62     | 1.10 | 59.2   | 1.05 | 53.7   | 0.95 | 51.9   | 0.92 |
| Q9ULK6    | RING finger protein 150 OS    | 263.9 | 261.6 | 0.99 | 235    | 0.89 | 217   | 0.82 | 266.4  | 1.01 | 292.7  | 1.11 | 242.5  | 0.92 | 220.3  | 0.83 |
| Q8NG20    | Plasminogen/activator kring   | 180.8 | 122.3 | 0.68 | 103.2  | 0.57 | 93.3  | 0.52 | 119.2  | 0.66 | 128.8  | 0.71 | 136.6  | 0.76 | 211.5  | 1.17 |
| Q8N2G4    | Ly6/PLAUR domain-contain      |       |       |      |        |      |       |      |        |      |        |      |        |      |        |      |
| A0A0G2JHI | Myelin-oligodendrocyte gly    | 99.1  | 99.9  | 1.01 | 90.3   | 0.91 | 80.3  | 0.81 | 99.6   | 1.01 | 104.5  | 1.05 | 91.2   | 0.92 | 80.9   | 0.82 |
| Q53Y06    | ATPase, H+ transporting, ly   | 145.2 | 222.5 | 1.53 | 215.2  | 1.48 | 198.8 | 1.37 | 192.5  | 1.33 | 212.5  | 1.46 | 224.7  | 1.55 | 172.8  | 1.19 |
| B5TMG5    | Histidine rich calcium bindi  | 636.8 | 603   | 0.95 | 401.1  | 0.63 | 373.4 | 0.59 | 572.2  | 0.90 | 635.3  | 1.00 | 520.7  | 0.82 | 435.4  | 0.68 |
| B7Z6S9    | Glucosylceramidase OS=Ho      | 86.2  | 122.6 | 1.42 | 87.3   | 1.01 | 87.1  | 1.01 | 96     | 1.11 | 128    | 1.48 | 102.8  | 1.19 | 80.7   | 0.94 |
| Q9H6Y7    | E3 ubiquitin-protein ligase F | 93.1  | 101.6 | 1.09 | 68.8   | 0.74 | 62.8  | 0.67 | 85     | 0.91 | 78.9   | 0.85 | 83.8   | 0.90 | 78.9   | 0.85 |
| Q6ZSJ9    | Protein shisa-6 homolog OS    | 109.9 | 116.6 | 1.06 | 120    | 1.09 | 86.5  | 0.79 | 107.4  | 0.98 | 104.5  | 0.95 | 123    | 1.12 | 91.1   | 0.83 |
| G9FP35    | Guanine nucleotide binding    | 122.5 | 134.5 | 1.10 | 134.8  | 1.10 | 103.7 | 0.85 | 151    | 1.23 | 151.6  | 1.24 | 153.1  | 1.25 | 124.5  | 1.02 |
| O14786    | Neuropilin-1 OS=Homo sap      | 11.3  | 17    | 1.50 | 13.9   | 1.23 | 10.9  | 0.96 | 9.3    | 0.82 | 8.1    | 0.72 | 13.4   | 1.19 | 12.5   | 1.11 |
| Q7L9L4    | MOB kinase activator 1B O     | 10.2  | 20.6  | 2.02 | 9.6    | 0.94 | 11.8  | 1.16 | 11.5   | 1.13 | 18.8   | 1.84 | 15.3   | 1.50 | 12     | 1.18 |
| Q59FM9    | TYRO3 protein tyrosine kin    |       |       |      |        |      |       |      |        |      |        |      |        |      |        |      |
| B2RB70    | Neurocalcin delta, isoform C  | 155   | 193.8 | 1.25 | 147.6  | 0.95 | 126.8 | 0.82 | 158.4  | 1.02 | 186.1  | 1.20 | 177.7  | 1.15 | 138.9  | 0.90 |
| A0A024R23 | Tyrosine-protein kinase rece  | 25.5  | 24.4  | 0.96 | 28.1   | 1.10 | 13.5  | 0.53 | 27.7   | 1.09 | 22.5   | 0.88 | 22.9   | 0.90 | 22.5   | 0.88 |
| Q53TN4    | Cytochrome b reductase 1 C    | 186.2 | 212.3 | 1.14 | 168.5  | 0.90 | 174.6 | 0.94 | 222    | 1.19 | 237.1  | 1.27 | 180.6  | 0.97 | 148.3  | 0.80 |
| Q15043    | Zinc transporter ZIP14 OS=    | 133   | 163.4 | 1.23 | 128.1  | 0.96 | 122.7 | 0.92 | 168    | 1.26 | 153    | 1.15 | 257.6  | 1.94 | 128.8  | 0.97 |
| Q08708    | CMRF35-like molecule 6 O      | 425.2 | 433.4 | 1.02 | 357.3  | 0.84 | 289.4 | 0.68 | 479.1  | 1.13 | 520.1  | 1.22 | 507.8  | 1.19 | 424.8  | 1.00 |
| A0A0B4J1S | High affinity immunoglobul    | 380.5 | 321.4 | 0.84 | 269    | 0.71 | 236   | 0.62 | 340.9  | 0.90 | 291.6  | 0.77 | 368.7  | 0.97 | 347.6  | 0.91 |
| P0DKV0    | Spermatogenesis-associated    | 633.5 | 605.1 | 0.96 | 512.5  | 0.81 | 762.5 | 1.20 | 501.2  | 0.79 | 473    | 0.75 | 581.2  | 0.92 | 639.1  | 1.01 |
| A0A087X1I | Serpin B6 OS=Homo sapien      | 59.1  | 63.8  | 1.08 | 65.1   | 1.10 | 50    | 0.85 | 56.8   | 0.96 | 64.3   | 1.09 | 59.2   | 1.00 | 57.3   | 0.97 |
| V9GYJ8    | Apolipoprotein C-II OS=Ho     |       |       |      |        |      |       |      |        |      |        |      |        |      |        |      |
| Q7Z7G8    | Vacuolar protein sorting-ass  | 184   | 192.1 | 1.04 | 268    | 1.46 | 132.2 | 0.72 | 204.4  | 1.11 | 219.2  | 1.19 | 153.4  | 0.83 | 185.6  | 1.01 |
| A0A0X9US  | MS-D2 light chain variable    |       |       |      |        |      |       |      |        |      |        |      |        |      |        |      |
| A8K9D8    | cDNA FLJ78129, highly sin     | 79.3  | 103.8 | 1.31 | 78.4   | 0.99 | 76.9  | 0.97 | 75     | 0.95 | 75.2   | 0.95 | 77.5   | 0.98 | 73.2   | 0.92 |
| A0A087WT  | Protein sidekick-1 OS=Hon     |       |       |      |        |      |       |      |        |      |        |      |        |      |        |      |
| P61457    | Pterin-4-alpha-carbinolamin   | 182.4 | 247.2 | 1.36 | 161.1  | 0.88 | 146.9 | 0.81 | 164.6  | 0.90 | 199    | 1.09 | 176.3  | 0.97 | 161.5  | 0.89 |
| P80511    | Protein S100-A12 OS=Hon       | 750.5 | 1210  | 1.61 | 875.6  | 1.17 | 607.9 | 0.81 | 1073.4 | 1.43 | 1010.6 | 1.35 | 1011.6 | 1.35 | 1638.1 | 2.18 |
| Q8WWQ8    | Stabilin-2 OS=Homo sapien     | 11.6  | 26.1  | 2.25 | 15.4   | 1.33 | 19.7  | 1.70 | 16     | 1.38 | 21.3   | 1.84 | 17.4   | 1.50 | 17     | 1.47 |
| A0A087WS  | Nucleobindin 2, isoform CR    | 49.3  | 86.5  | 1.75 | 56.8   | 1.15 | 43.7  | 0.89 | 72.2   | 1.46 | 64.8   | 1.31 | 62.8   | 1.27 | 53.6   | 1.09 |
| A0A125U0U | MS-C3 light chain variable    | 198.8 | 117.6 | 1.19 | 79.2   | 0.80 | 155.7 | 1.58 | 107.3  | 1.09 | 114.3  | 1.16 | 84.8   | 0.86 | 93     | 0.94 |
| Q6UW88    | Epigen OS=Homo sapiens C      | 50.2  | 84.1  | 1.68 | 51.8   | 1.03 | 54.8  | 1.09 | 63.1   | 1.26 | 64.6   | 1.29 | 60.6   | 1.21 | 54.9   | 1.09 |
| P09382    | Galectin-1 OS=Homo sapien     | 68.1  | 78.6  | 1.15 | 83.7   | 1.23 | 69.6  | 1.02 | 86     | 1.26 | 77.4   | 1.14 | 71.7   | 1.05 | 53.6   | 0.79 |
| P62070    | Ras-related protein R-Ras2    | 61.1  | 83    | 1.36 | 54.3   | 0.89 | 65.6  | 1.07 | 75.1   | 1.23 | 77.2   | 1.26 | 81.2   | 1.33 | 54.4   | 0.89 |
| B2RCC8    | cDNA, FLJ95990 OS=Hom         | 17.6  | 34.1  | 1.94 | 21.8   | 1.24 | 17.4  | 0.99 | 21     | 1.19 | 22.2   | 1.26 | 30.9   | 1.76 | 18.9   | 1.07 |
| Q96RZ2    | N-acetylglucosamine-1-phos    | 59.5  | 63.6  | 1.07 | 47.3   | 0.79 | 40.9  | 0.69 | 49     | 0.82 | 66.4   | 1.12 | 53     | 0.89 | 47.9   | 0.81 |
| P01127    | Platelet-derived growth fact  | 56.2  | 74.1  | 1.32 | 50.8   | 0.90 | 50.1  | 0.89 | 53.7   | 0.96 | 54.8   | 0.98 | 62.9   | 1.12 | 49.5   | 0.88 |
| A0A0C4DH  | Protein IGKV6D-41 (Fragm      | 163.8 | 185.7 | 1.13 | 152.5  | 0.93 | 136.9 | 0.84 | 154.5  | 0.94 | 154.7  | 0.94 | 161    | 0.98 | 193.7  | 1.18 |
| B2R9K8    | cDNA, FLJ94440, highly sii    | 17.3  | 45.5  | 2.63 | 22.9   | 1.32 | 21.2  | 1.23 | 23.8   | 1.38 | 29     | 1.68 | 38.9   | 2.25 | 27.8   | 1.61 |
| Q9Y6U3    | Adseverin OS=Homo sapien      | 70.8  | 92.6  | 1.31 | 92.8   | 1.31 | 64    | 0.90 | 79.2   | 1.12 | 73     | 1.03 | 84.9   | 1.20 | 85.4   | 1.21 |

|           |                                |       |       |      |       |      |       |      |       |      |       |      |       |      |       |      |
|-----------|--------------------------------|-------|-------|------|-------|------|-------|------|-------|------|-------|------|-------|------|-------|------|
| O43493    | Trans-Golgi network integr     | 164.8 | 163   | 0.99 | 121.1 | 0.73 | 104.1 | 0.63 | 144.2 | 0.88 | 141.3 | 0.86 | 178.1 | 1.08 | 128.6 | 0.78 |
| Q9HCM3    | UPF0606 protein KIAA154        | 22.7  | 26.1  | 1.15 | 16.9  | 0.74 | 15.7  | 0.69 | 19.2  | 0.85 | 21.6  | 0.95 | 21.3  | 0.94 | 18.8  | 0.83 |
| P13521    | Secretogranin-2 OS=Homo        | 132.3 | 186.6 | 1.41 | 232.1 | 1.75 | 131.2 | 0.99 | 217.4 | 1.64 | 159.4 | 1.20 | 226.3 | 1.71 | 149.7 | 1.13 |
| P16234    | Platelet-derived growth fact   | 29.7  | 33.2  | 1.12 | 26    | 0.88 | 30.5  | 1.03 | 26.2  | 0.88 | 29.4  | 0.99 | 22.1  | 0.74 | 27.9  | 0.94 |
| Q96AX9    | E3 ubiquitin-protein ligase    | 88.1  | 84.1  | 0.95 | 28.5  | 0.32 | 30.2  | 0.34 | 59.4  | 0.67 | 52.6  | 0.60 | 78    | 0.89 | 45.5  | 0.52 |
| Q86YD5    | Low-density lipoprotein rec    | 10.8  | 14.4  | 1.33 | 17.7  | 1.64 | 9.9   | 0.92 | 16.5  | 1.53 | 11.8  | 1.09 | 14.2  | 1.31 | 11.6  | 1.07 |
| A6NL88    | Protein shisa-7 OS=Homo s      | 75.4  | 80    | 1.06 | 57    | 0.76 | 133   | 1.76 | 76.5  | 1.01 | 74.3  | 0.99 | 73.3  | 0.97 | 62.3  | 0.83 |
| E5RIM7    | Copper transport protein AT    | 29.3  | 31.9  | 1.09 | 34.8  | 1.19 | 32.1  | 1.10 | 25.7  | 0.88 | 27.2  | 0.93 | 34.5  | 1.18 | 35    | 1.19 |
| Q9NQ79    | Cartilage acidic protein 1 O   | 82.3  | 91.6  | 1.11 | 71.7  | 0.87 | 85    | 1.03 | 85.4  | 1.04 | 74.4  | 0.90 | 96    | 1.17 | 73.4  | 0.89 |
| O94991    | SLIT and NTRK-like protei      | 98.7  | 135.1 | 1.37 | 156.6 | 1.59 | 100.1 | 1.01 | 122.8 | 1.24 | 109.4 | 1.11 | 155.5 | 1.58 | 94.3  | 0.96 |
| B4DZM1    | cDNA FLJ58310, highly sin      | 261.6 | 243   | 0.93 | 208.8 | 0.80 | 295.4 | 1.13 | 222.6 | 0.85 | 225.1 | 0.86 | 244.1 | 0.93 | 219.2 | 0.84 |
| B7Z6Z4    | Myosin light polypeptide 6 (   | 66.5  | 80.6  | 1.21 | 56.1  | 0.84 | 37.9  | 0.57 | 54.2  | 0.82 | 63.5  | 0.95 | 67.3  | 1.01 | 69.6  | 1.05 |
| O14494    | Phospholipid phosphatase 1     | 152.4 | 196.6 | 1.29 | 151.5 | 0.99 | 147.6 | 0.97 | 149.9 | 0.98 | 176.9 | 1.16 | 126.3 | 0.83 | 151.3 | 0.99 |
| Q8N386    | Leucine-rich repeat-containi   |       |       |      |       |      |       |      |       |      |       |      |       |      |       |      |
| Q9UHY7    | Enolase-phosphatase E1 OS      | 11.8  | 17.8  | 1.51 | 13.5  | 1.14 | 11    | 0.93 | 10.6  | 0.90 | 11.3  | 0.96 | 13.5  | 1.14 | 10.1  | 0.86 |
| P17927    | Complement receptor type 1     | 48.3  | 52    | 1.08 | 53.3  | 1.10 | 36.8  | 0.76 | 37.4  | 0.77 | 47.2  | 0.98 | 55.1  | 1.14 | 35.7  | 0.74 |
| P29317    | Ephrin type-A receptor 2 OS    |       |       |      |       |      |       |      |       |      |       |      |       |      |       |      |
| Q96S16    | JmjC domain-containing pro     |       |       |      |       |      |       |      |       |      |       |      |       |      |       |      |
| P56159    | GDNF family receptor alph      | 334.3 | 412.4 | 1.23 | 328.2 | 0.98 | 386.6 | 1.16 | 351.5 | 1.05 | 317.1 | 0.95 | 499   | 1.49 | 312.1 | 0.93 |
| Q9Y490    | Talin-1 OS=Homo sapiens (      | 46.5  | 49.7  | 1.07 | 55.6  | 1.20 | 32.6  | 0.70 | 40.9  | 0.88 | 45.8  | 0.98 | 57.4  | 1.23 | 49.1  | 1.06 |
| Q59GD9    | Myelin associated glycoprot    |       |       |      |       |      |       |      |       |      |       |      |       |      |       |      |
| A0A024R6F | Galactosylceramidase, isof     | 63.7  | 99.9  | 1.57 | 78.5  | 1.23 | 61.6  | 0.97 | 82.6  | 1.30 | 77.4  | 1.22 | 78.2  | 1.23 | 78.9  | 1.24 |
| A0A024R1K | Parvalbumin, isoform CRA       |       |       |      |       |      |       |      |       |      |       |      |       |      |       |      |
| A0A024RB3 | Solute carrier family 39 (Me   | 65.3  | 103.6 | 1.59 | 57.4  | 0.88 | 45    | 0.69 | 58.4  | 0.89 | 77    | 1.18 | 79.3  | 1.21 | 42.8  | 0.66 |
| Q5T7Y6    | Protein S100 OS=Homo sap       |       |       |      |       |      |       |      |       |      |       |      |       |      |       |      |
| Q59EU6    | EF hand domain family, me      | 10.2  | 22.4  | 2.20 | 12.7  | 1.25 | 13.6  | 1.33 | 12.2  | 1.20 | 18.2  | 1.78 | 17.3  | 1.70 | 13.4  | 1.31 |
| Q7Z4W1    | L-xylulose reductase OS=H      | 161   | 245.2 | 1.52 | 167.9 | 1.04 | 190.3 | 1.18 | 178.1 | 1.11 | 206.6 | 1.28 | 172.8 | 1.07 | 148.9 | 0.92 |
| Q6I929    | HCG1978654 OS=Homo sa          | 27.4  | 34.1  | 1.24 | 22.8  | 0.83 | 32    | 1.17 | 28.4  | 1.04 | 29.2  | 1.07 | 25.4  | 0.93 | 25.8  | 0.94 |
| A0A0F7RQ  | Follicle stimulating hormon    | 303.2 | 306.7 | 1.01 | 243.5 | 0.80 | 193.2 | 0.64 | 218.8 | 0.72 | 312.8 | 1.03 | 311   | 1.03 | 291.6 | 0.96 |
| V9HWJ1    | Glutathione synthetase OS=     |       |       |      |       |      |       |      |       |      |       |      |       |      |       |      |
| S4R347    | Formin-binding protein 1-li    |       |       |      |       |      |       |      |       |      |       |      |       |      |       |      |
| A0A1B0GU  | Uncharacterized protein OS     | 27.8  | 25.5  | 0.92 | 14.2  | 0.51 | 22.1  | 0.79 | 17.1  | 0.62 | 16.8  | 0.60 | 23.3  | 0.84 | 22.6  | 0.81 |
| A0A087WU  | Protein SYNJ2BP-COX16 (        |       |       |      |       |      |       |      |       |      |       |      |       |      |       |      |
| Q9H741    | UPF0454 protein C12orf49       | 29.4  | 30.5  | 1.04 | 34.9  | 1.19 | 27.2  | 0.93 | 29.7  | 1.01 | 28    | 0.95 | 26.2  | 0.89 | 23.4  | 0.80 |
| P30101    | Protein disulfide-isomerase    | 33    | 45.8  | 1.39 | 50    | 1.52 | 38.6  | 1.17 | 41.1  | 1.25 | 37.8  | 1.15 | 48.8  | 1.48 | 39.5  | 1.20 |
| P22692    | Insulin-like growth factor-bi  | 130.8 | 149.9 | 1.15 | 148.4 | 1.13 | 158.8 | 1.21 | 128.6 | 0.98 | 133.5 | 1.02 | 145.8 | 1.11 | 128.8 | 0.98 |
| Q9H0X4    | Protein FAM234A OS=Hor         | 42.8  | 61.4  | 1.43 | 44.4  | 1.04 | 48.8  | 1.14 | 50.7  | 1.18 | 53.1  | 1.24 | 49.7  | 1.16 | 37    | 0.86 |
| Q6ZMU0    | Delta-aminolevulinic acid de   |       |       |      |       |      |       |      |       |      |       |      |       |      |       |      |
| Q8TBD0    | Uncharacterized protein (Fr    | 77.9  | 84.6  | 1.09 | 76.7  | 0.98 | 96    | 1.23 | 96.2  | 1.23 | 84.9  | 1.09 | 80.6  | 1.03 | 110.1 | 1.41 |
| X6R7Y7    | Intraflagellar transport prote | 26.7  | 34.8  | 1.30 | 34.4  | 1.29 | 22.2  | 0.83 | 36    | 1.35 | 28    | 1.05 | 31.7  | 1.19 | 30.1  | 1.13 |
| B4DU44    | Involucrin OS=Homo sapie       | 29.9  | 43.4  | 1.45 | 25.7  | 0.86 | 34.3  | 1.15 | 28.3  | 0.95 | 30.1  | 1.01 | 26.8  | 0.90 | 39.5  | 1.32 |
| Q8TER0    | Sushi, nidogen and EGF-like    |       |       |      |       |      |       |      |       |      |       |      |       |      |       |      |
| Q9Y3R5    | Protein dopey-2 OS=Homo        | 18.7  | 33.4  | 1.79 | 52.7  | 2.82 | 33.8  | 1.81 | 23.2  | 1.24 | 25.8  | 1.38 | 24.2  | 1.29 | 17.6  | 0.94 |
| B2R8C2    | Tyrosine-protein kinase OS=    |       |       |      |       |      |       |      |       |      |       |      |       |      |       |      |
| P09543    | 2',3'-cyclic-nucleotide 3'-ph  |       |       |      |       |      |       |      |       |      |       |      |       |      |       |      |
| A0A024QZ  | NAD(P)H dehydrogenase, c       | 66.2  | 99.8  | 1.51 | 61.1  | 0.92 | 137.6 | 2.08 | 84.7  | 1.28 | 91.9  | 1.39 | 87.9  | 1.33 | 77.4  | 1.17 |
| P51159    | Ras-related protein Rab-27A    | 190.9 | 207.2 | 1.09 | 259.3 | 1.36 | 193.5 | 1.01 | 185.5 | 0.97 | 183   | 0.96 | 126.7 | 0.66 | 123.1 | 0.64 |
| P55010    | Eukaryotic translation initial | 346.4 | 330.4 | 0.95 | 250.3 | 0.72 | 242.2 | 0.70 | 292.2 | 0.84 | 297.8 | 0.86 | 333.6 | 0.96 | 296.7 | 0.86 |
| P48509    | CD151 antigen OS=Homo s        | 30.4  | 43.6  | 1.43 | 32.2  | 1.06 | 27.4  | 0.90 | 33.7  | 1.11 | 34.8  | 1.14 | 40.1  | 1.32 | 27.9  | 0.92 |
| P18085    | ADP-ribosylation factor 4 C    | 20.6  | 36.6  | 1.78 | 24.6  | 1.19 | 32.1  | 1.56 | 20.4  | 0.99 | 23.7  | 1.15 | 18.6  | 0.90 | 18.6  | 0.90 |
| Q53H88    | Dynactin 2 variant (Fragme     | 101.2 | 92.2  | 0.91 | 90.7  | 0.90 | 67.6  | 0.67 | 89.7  | 0.89 | 97.4  | 0.96 | 83.6  | 0.83 | 99.5  | 0.98 |
| A8K8U1    | cDNA FLJ77762, highly sin      | 26    | 36.4  | 1.40 | 29.7  | 1.14 | 24.4  | 0.94 | 26.6  | 1.02 | 34.4  | 1.32 | 30.3  | 1.17 | 28.7  | 1.10 |
| B3KR33    | cDNA FLJ33589 fis, clone       | 155.8 | 195.3 | 1.25 | 159.1 | 1.02 | 118.3 | 0.76 | 162.6 | 1.04 | 152.5 | 0.98 | 146.7 | 0.94 | 135.4 | 0.87 |
| P54826    | Growth arrest-specific prote   | 887   | 955.2 | 1.08 | 877.9 | 0.99 | 660.9 | 0.75 | 943.3 | 1.06 | 941.9 | 1.06 | 946.1 | 1.07 | 817.2 | 0.92 |
| B4DWA6    | cDNA FLJ60094, highly sin      | 153.1 | 188.6 | 1.23 | 155.8 | 1.02 | 147.6 | 0.96 | 140.3 | 0.92 | 151.8 | 0.99 | 157   | 1.03 | 157.1 | 1.03 |
| D6W551    | Chromosome 2 open reading      | 73.6  | 62.1  | 0.84 | 49.9  | 0.68 | 45.2  | 0.61 | 56.3  | 0.76 | 53.7  | 0.73 | 93.7  | 1.27 | 61.1  | 0.83 |
| A0A140VJJ | S-formylglutathione hydrola    |       |       |      |       |      |       |      |       |      |       |      |       |      |       |      |
| A0A024R3F | Sodium channel, voltage-ga     | 167.9 | 169   | 1.01 | 131.3 | 0.78 | 121.3 | 0.72 | 136   | 0.81 | 165.8 | 0.99 | 129.4 | 0.77 | 130.2 | 0.78 |



|           |                               |       |       |      |       |      |       |      |       |      |       |      |       |      |       |      |  |
|-----------|-------------------------------|-------|-------|------|-------|------|-------|------|-------|------|-------|------|-------|------|-------|------|--|
| A0A0A7E7  | Endoplasmic reticulum amir    |       |       |      |       |      |       |      |       |      |       |      |       |      |       |      |  |
| O95861    | 3'(2'),5'-bisphosphate nucleo | 21.3  | 35.5  | 1.67 | 23.6  | 1.11 | 20.7  | 0.97 | 26.8  | 1.26 | 33.3  | 1.56 | 31.7  | 1.49 | 25.7  | 1.21 |  |
| A2NW98    | Rheumatoid factor light cha   | 186.7 | 184.1 | 0.99 | 175.2 | 0.94 | 115.5 | 0.62 | 138.6 | 0.74 | 151.4 | 0.81 | 138   | 0.74 | 204.9 | 1.10 |  |
| Q9HD42    | Charged multivesicular bod    | 126.2 | 131   | 1.04 | 102.8 | 0.81 | 87.8  | 0.70 | 109.3 | 0.87 | 136.5 | 1.08 | 115.9 | 0.92 | 107   | 0.85 |  |
| B7Z6C9    | Transmembrane 9 superfam      | 32.7  | 34.2  | 1.05 | 23.2  | 0.71 | 32.1  | 0.98 | 28.8  | 0.88 | 36.5  | 1.12 | 27    | 0.83 | 24.3  | 0.74 |  |
| B2RAF9    | Suppressor of tumorigenicit   | 33.1  | 48.5  | 1.47 | 61.9  | 1.87 | 42.9  | 1.30 | 45.8  | 1.38 | 50.1  | 1.51 | 48.5  | 1.47 | 43.1  | 1.30 |  |
| P80723    | Brain acid soluble protein 1  | 268   | 314.6 | 1.17 | 286.2 | 1.07 | 207.2 | 0.77 | 300.1 | 1.12 | 245.8 | 0.92 | 255.1 | 0.95 | 209   | 0.78 |  |
| Q92743    | Serine protease HTRA1 OS      | 74.4  | 299.2 | 4.02 | 82    | 1.10 | 52.3  | 0.70 | 72.8  | 0.98 | 66.7  | 0.90 | 123.9 | 1.67 | 70.4  | 0.95 |  |
| Q8WU39    | Marginal zone B- and B1-ce    | 35    | 39.7  | 1.13 | 45.7  | 1.31 | 28.3  | 0.81 | 46.6  | 1.33 | 36.5  | 1.04 | 35.9  | 1.03 | 39    | 1.11 |  |
| O15031    | Plexin-B2 OS=Homo sapien      |       |       |      |       |      |       |      |       |      |       |      |       |      |       |      |  |
| Q9UBV8    | Peflin OS=Homo sapiens G      | 99.1  | 153.7 | 1.55 | 104.5 | 1.05 | 114.8 | 1.16 | 123.8 | 1.25 | 160   | 1.61 | 110.4 | 1.11 | 104.2 | 1.05 |  |
| Q13740    | CD166 antigen OS=Homo s       | 24.8  | 22.8  | 0.92 | 24.7  | 1.00 | 23    | 0.93 | 22.7  | 0.92 | 23.7  | 0.96 | 21    | 0.85 | 19.2  | 0.77 |  |
| C9JIF9    | Acylamino-acid-releasing er   | 37.4  | 50.4  | 1.35 | 48.8  | 1.30 | 39.8  | 1.06 | 45.2  | 1.21 | 45    | 1.20 | 55.3  | 1.48 | 33.9  | 0.91 |  |
| A0N5G7    | Rheumatoid factor D5 heav     | 88.1  | 107.1 | 1.22 | 80.3  | 0.91 | 141.9 | 1.61 | 77.7  | 0.88 | 82.6  | 0.94 | 93.1  | 1.06 | 102   | 1.16 |  |
| U3KQ56    | Glyoxylate reductase/hydro    | 11.8  | 18.4  | 1.56 | 9.6   | 0.81 | 14.1  | 1.19 | 9.9   | 0.84 | 14.3  | 1.21 | 12.3  | 1.04 | 10.1  | 0.86 |  |
| P46952    | 3-hydroxyanthranilate 3,4-d   | 70.8  | 85.5  | 1.21 | 71.6  | 1.01 | 66.2  | 0.94 | 73.7  | 1.04 | 85.9  | 1.21 | 76.9  | 1.09 | 59.6  | 0.84 |  |
| Q9BQR3    | Serine protease 27 OS=Hon     | 62.1  | 65.2  | 1.05 | 64.6  | 1.04 | 51.4  | 0.83 | 74.6  | 1.20 | 71.8  | 1.16 | 76    | 1.22 | 74.8  | 1.20 |  |
| Q13277    | Syntaxin-3 OS=Homo sapie      | 106   | 140.8 | 1.33 | 89    | 0.84 | 118.1 | 1.11 | 125.9 | 1.19 | 121   | 1.14 | 118.4 | 1.12 | 103   | 0.97 |  |
| Q14764    | Major vault protein OS=Ho     |       |       |      |       |      |       |      |       |      |       |      |       |      |       |      |  |
| D6R956    | Ubiquitin carboxyl-terminal   | 147.3 | 169.8 | 1.15 | 108.5 | 0.74 | 139.3 | 0.95 | 134.8 | 0.92 | 165.9 | 1.13 | 171.8 | 1.17 | 143.1 | 0.97 |  |
| P16930    | Fumarylacetoacetase OS=H      |       |       |      |       |      |       |      |       |      |       |      |       |      |       |      |  |
| A2TDC0    | Titin-cap (Telethonin) OS=I   |       |       |      |       |      |       |      |       |      |       |      |       |      |       |      |  |
| Q99584    | Protein S100-A13 OS=Hom       | 100   | 108.2 | 1.08 | 85.2  | 0.85 | 96.5  | 0.97 | 90.9  | 0.91 | 113.3 | 1.13 | 121.5 | 1.22 | 98.4  | 0.98 |  |
| A0A0S2Z61 | Transmembrane protein 67 i    |       |       |      |       |      |       |      |       |      |       |      |       |      |       |      |  |
| Q15366    | Poly(rC)-binding protein 2 C  |       |       |      |       |      |       |      |       |      |       |      |       |      |       |      |  |
| L7RSM2    | Mitogen-activated protein k   | 120.6 | 121.3 | 1.01 | 89    | 0.74 | 86.5  | 0.72 | 128.3 | 1.06 | 96.7  | 0.80 | 114.6 | 0.95 | 131.8 | 1.09 |  |
| Q86SQ4    | Adhesion G-protein couple     |       |       |      |       |      |       |      |       |      |       |      |       |      |       |      |  |
| P29373    | Cellular retinoic acid-bindin | 32.7  | 47.2  | 1.44 | 40.6  | 1.24 | 28.7  | 0.88 | 39.7  | 1.21 | 40.1  | 1.23 | 44.5  | 1.36 | 50.4  | 1.54 |  |
| C9JVC9    | Voltage-dependent calcium     | 225.8 | 212   | 0.94 | 192.2 | 0.85 | 201.4 | 0.89 | 215.3 | 0.95 | 217   | 0.96 | 205.6 | 0.91 | 203.3 | 0.90 |  |
| A0A024R63 | Endothelin receptor type B,   | 216.1 | 227.3 | 1.05 | 195.1 | 0.90 | 217.3 | 1.01 | 220.6 | 1.02 | 229.2 | 1.06 | 234.7 | 1.09 | 194.8 | 0.90 |  |
| Q9NX62    | Inositol monophosphatase 3    | 13.2  | 22.3  | 1.69 | 18.3  | 1.39 | 15    | 1.14 | 17    | 1.29 | 23    | 1.74 | 24    | 1.82 | 17.2  | 1.30 |  |
| Q9UBG0    | C-type mannose receptor 2 C   |       |       |      |       |      |       |      |       |      |       |      |       |      |       |      |  |
| P28072    | Proteasome subunit beta typ   | 55.8  | 61.9  | 1.11 | 39    | 0.70 | 53.2  | 0.95 | 40.9  | 0.73 | 49.1  | 0.88 | 47.2  | 0.85 | 43.9  | 0.79 |  |
| P40197    | Platelet glycoprotein V OS=   |       |       |      |       |      |       |      |       |      |       |      |       |      |       |      |  |
| P46781    | 40S ribosomal protein S9 O    | 93.2  | 156.7 | 1.68 | 139.9 | 1.50 | 111.5 | 1.20 | 155.4 | 1.67 | 134.7 | 1.45 | 90.5  | 0.97 | 199.3 | 2.14 |  |
| A0A024RA1 | HCG2009644, isoform CR/       | 63    | 93.7  | 1.49 | 58.4  | 0.93 | 58.6  | 0.93 | 48.5  | 0.77 | 57.5  | 0.91 | 67.9  | 1.08 | 59.5  | 0.94 |  |
| Q5R3I4    | Tetratricopeptide repeat pro  |       |       |      |       |      |       |      |       |      |       |      |       |      |       |      |  |
| A0PJK1    | Sodium/glucose cotransport    |       |       |      |       |      |       |      |       |      |       |      |       |      |       |      |  |
| A0A140VK  | Leukotriene A(4) hydrolase    | 28.3  | 49.7  | 1.76 | 34.5  | 1.22 | 30    | 1.06 | 42.1  | 1.49 | 50    | 1.77 | 29.8  | 1.05 | 38.7  | 1.37 |  |
| P23434    | Glycine cleavage system H p   | 81.5  | 101.3 | 1.24 | 94.3  | 1.16 | 100.8 | 1.24 | 94.9  | 1.16 | 95.6  | 1.17 | 102.4 | 1.26 | 86.1  | 1.06 |  |
| Q96HA4    | Uncharacterized protein C1    | 194.7 | 186.6 | 0.96 | 156.9 | 0.81 | 179.8 | 0.92 | 192.1 | 0.99 | 167.4 | 0.86 | 158   | 0.81 | 185.4 | 0.95 |  |
| Q96ID5    | Immunoglobulin superfamil     | 35.5  | 28.9  | 0.81 | 32    | 0.90 | 17.1  | 0.48 | 31.9  | 0.90 | 26.6  | 0.75 | 25.8  | 0.73 | 22.6  | 0.64 |  |
| J3QRU1    | Tyrosine-protein kinase OS=   | 81.5  | 98.1  | 1.20 | 69.7  | 0.86 | 95.8  | 1.18 | 90.3  | 1.11 | 92.8  | 1.14 | 94.3  | 1.16 | 70.2  | 0.86 |  |
| A0A0U1RQ  | Neurexin-3-beta OS=Homo       |       |       |      |       |      |       |      |       |      |       |      |       |      |       |      |  |
| D0AB04    | Rhesus blood group CcEe al    |       |       |      |       |      |       |      |       |      |       |      |       |      |       |      |  |
| D3DSM8    | Formiminotransferase cyclo    | 26.4  | 46.7  | 1.77 | 34.5  | 1.31 | 25.4  | 0.96 | 26.1  | 0.99 | 42    | 1.59 | 36    | 1.36 | 20.6  | 0.78 |  |
| A0A024R5U | ADAM metalloproteinase do     | 93.2  | 371.3 | 3.98 | 122.3 | 1.31 | 98.8  | 1.06 | 113.3 | 1.22 | 106.5 | 1.14 | 113.2 | 1.21 | 85.4  | 0.92 |  |
| A0A024R1C | Tyrosylprotein sulfotransfer  | 88.3  | 77.1  | 0.87 | 96.7  | 1.10 | 65.4  | 0.74 | 77.8  | 0.88 | 80.1  | 0.91 | 60.1  | 0.68 | 81    | 0.92 |  |
| P28827    | Receptor-type tyrosine-prote  |       |       |      |       |      |       |      |       |      |       |      |       |      |       |      |  |
| G3V4P8    | Glia maturation factor beta   | 28.9  | 36.3  | 1.26 | 31.5  | 1.09 | 22.9  | 0.79 | 29.2  | 1.01 | 34.5  | 1.19 | 30.5  | 1.06 | 28.9  | 1.00 |  |
| Q8IWX7    | Protein unc-45 homolog B C    |       |       |      |       |      |       |      |       |      |       |      |       |      |       |      |  |
| Q9Y639    | Neuroplastin OS=Homo sap      | 263.4 | 273.7 | 1.04 | 220.7 | 0.84 | 233.1 | 0.88 | 240.6 | 0.91 | 234.9 | 0.89 | 281.1 | 1.07 | 209.7 | 0.80 |  |
| Q8IY95    | Transmembrane protein 192     |       |       |      |       |      |       |      |       |      |       |      |       |      |       |      |  |
| P14778    | Interleukin-1 receptor type   | 190.2 | 98.9  | 1.10 | 109.7 | 1.22 | 77.3  | 0.86 | 98.7  | 1.09 | 132   | 1.46 | 90    | 1.00 | 76.5  | 0.85 |  |
| P46108    | Adapter molecule crk OS=H     | 139.5 | 170.4 | 1.22 | 145.4 | 1.04 | 93.8  | 0.67 | 128.3 | 0.92 | 163.7 | 1.17 | 186.5 | 1.34 | 125.6 | 0.90 |  |
| Q9Y546    | Leucine-rich repeat-containi  | 408   | 580   | 1.42 | 771.1 | 1.89 | 389.3 | 0.95 | 745.5 | 1.83 | 575.7 | 1.41 | 444.1 | 1.09 | 517.5 | 1.27 |  |
| B2R6Q2    | Alkaline phosphatase OS=H     | 12    | 20.5  | 1.71 | 12.8  | 1.07 | 30.9  | 2.58 | 18.2  | 1.52 | 16.3  | 1.36 | 17.3  | 1.44 | 16    | 1.33 |  |
| Q9H772    | Gremlin-2 OS=Homo sapien      | 86.7  | 72.7  | 0.84 | 99.2  | 1.14 | 63.1  | 0.73 | 96    | 1.11 | 89.2  | 1.03 | 87    | 1.00 | 77.2  | 0.89 |  |







|           |                              |       |       |      |       |      |       |      |       |      |       |      |       |      |       |      |
|-----------|------------------------------|-------|-------|------|-------|------|-------|------|-------|------|-------|------|-------|------|-------|------|
| B3KUZ7    | cDNA FLJ40986 fis, clone     | 86.5  | 118.1 | 1.37 | 102.8 | 1.19 | 83.6  | 0.97 | 90.2  | 1.04 | 122.5 | 1.42 | 128.6 | 1.49 | 71.3  | 0.82 |
| Q9BZJ0    | Crooked neck-like protein 1  |       |       |      |       |      |       |      |       |      |       |      |       |      |       |      |
| Q5FWE3    | Proline-rich transmembrane   |       |       |      |       |      |       |      |       |      |       |      |       |      |       |      |
| P35318    | ADM OS=Homo sapiens G        |       |       |      |       |      |       |      |       |      |       |      |       |      |       |      |
| Q86TD4    | Sarcalumenin OS=Homo sa      | 61.5  | 99.6  | 1.62 | 93.1  | 1.51 | 59.7  | 0.97 | 76.3  | 1.24 | 69.1  | 1.12 | 88    | 1.43 | 81.3  | 1.32 |
| Q09328    | Alpha-1,6-mannosylglycop     | 100.2 | 129.8 | 1.30 | 117.4 | 1.17 | 108   | 1.08 | 112.7 | 1.12 | 140.3 | 1.40 | 136.2 | 1.36 | 102.3 | 1.02 |
| B3KM35    | cDNA FLJ10144 fis, clone     |       |       |      |       |      |       |      |       |      |       |      |       |      |       |      |
| O60637    | Tetraspanin-3 OS=Homo sa     | 341.4 | 395.2 | 1.16 | 268.3 | 0.79 | 289   | 0.85 | 348.9 | 1.02 | 353.3 | 1.03 | 333.7 | 0.98 | 300.9 | 0.88 |
| A0A024RB  | Kit ligand OS=Homo sapier    | 39.5  | 39.5  | 1.00 | 44.8  | 1.13 | 29.4  | 0.74 | 36.3  | 0.92 | 38.1  | 0.96 | 44.1  | 1.12 | 41.1  | 1.04 |
| A0A140VJL | Testicular tissue protein Li | 15.8  | 17.9  | 1.13 | 12.6  | 0.80 | 15.9  | 1.01 | 13.5  | 0.85 | 17.9  | 1.13 | 19.4  | 1.23 | 14.6  | 0.92 |
| Q9H9V9    | JmjC domain-containing pro   |       |       |      |       |      |       |      |       |      |       |      |       |      |       |      |
| A8K690    | cDNA FLJ76863, highly sin    | 142.3 | 172.5 | 1.21 | 157.4 | 1.11 | 139.5 | 0.98 | 157.4 | 1.11 | 163.5 | 1.15 | 170.8 | 1.20 | 138.2 | 0.97 |
| B7Z7X3    | cDNA FLJ51770, highly sin    | 538.2 | 484.1 | 0.90 | 715.3 | 1.33 | 269   | 0.50 | 437   | 0.81 | 486.7 | 0.90 | 602.3 | 1.12 | 547.3 | 1.02 |
| A0A0G2JN1 | Leukocyte immunoglobulin-    |       |       |      |       |      |       |      |       |      |       |      |       |      |       |      |
| B7ZLW2    | HELZ protein OS=Homo sa      | 24.3  | 15.4  | 0.63 | 18.6  | 0.77 | 16.7  | 0.69 | 23.1  | 0.95 | 18.1  | 0.74 | 14.5  | 0.60 | 12.8  | 0.53 |
| P48547    | Potassium voltage-gated che  | 19    | 25.6  | 1.35 | 21.6  | 1.14 | 17.5  | 0.92 | 20    | 1.05 | 26.7  | 1.41 | 30    | 1.58 | 31    | 1.63 |
| O14618    | Copper chaperone for super   |       |       |      |       |      |       |      |       |      |       |      |       |      |       |      |
| H3BSR6    | Fractalkine OS=Homo sapie    | 81.4  | 101.7 | 1.25 | 88.8  | 1.09 | 178.5 | 2.19 | 92.8  | 1.14 | 99.7  | 1.22 | 83.8  | 1.03 | 90.2  | 1.11 |
| A6NKB5    | Pecanex-like protein 2 OS=   |       |       |      |       |      |       |      |       |      |       |      |       |      |       |      |
| Q8N436    | Inactive carboxypeptidase-li |       |       |      |       |      |       |      |       |      |       |      |       |      |       |      |
| Q6UWL6    | Kin of IRRE-like protein 2 ( | 13.9  | 17    | 1.22 | 13.8  | 0.99 | 12.7  | 0.91 | 12.9  | 0.93 | 12.6  | 0.91 | 14.5  | 1.04 | 12.9  | 0.93 |
| Q92618    | Zinc finger protein 516 OS=  |       |       |      |       |      |       |      |       |      |       |      |       |      |       |      |
| H9STE0    | Cytochrome c oxidase subun   | 204.9 | 198.6 | 0.97 | 183.3 | 0.89 | 146.3 | 0.71 | 207.7 | 1.01 | 168.9 | 0.82 | 233.6 | 1.14 | 183.2 | 0.89 |
| Q96NL6    | Sodium channel and clathrin  | 199.9 | 297.6 | 1.49 | 364.1 | 1.82 | 401.2 | 2.01 | 291.1 | 1.46 | 255.7 | 1.28 | 212.8 | 1.06 | 257.4 | 1.29 |
| B2RDG0    | Proteasome subunit alpha ty  |       |       |      |       |      |       |      |       |      |       |      |       |      |       |      |
| B4DPQ3    | cDNA FLJ51034, highly sin    | 21.5  | 28.9  | 1.34 | 20.1  | 0.93 | 16.1  | 0.75 | 24.1  | 1.12 | 23    | 1.07 | 24.7  | 1.15 | 21.3  | 0.99 |
| O43175    | D-3-phosphoglycerate dehy    |       |       |      |       |      |       |      |       |      |       |      |       |      |       |      |
| H9KV90    | SH3 and multiple ankyrin re  | 24.1  | 32.4  | 1.34 | 59.1  | 2.45 | 19.8  | 0.82 | 34.2  | 1.42 | 26.4  | 1.10 | 25.5  | 1.06 | 25.7  | 1.07 |
| Q6ZMJ2    | Scavenger receptor class A   | 63.4  | 80    | 1.26 | 55.5  | 0.88 | 57.2  | 0.90 | 59.4  | 0.94 | 60.6  | 0.96 | 63.7  | 1.00 | 55.6  | 0.88 |
| Q9BV40    | Vesicle-associated membrar   |       |       |      |       |      |       |      |       |      |       |      |       |      |       |      |
| A0A0A0MT  | Coiled-coil domain-containi  | 202.2 | 281.2 | 1.39 | 262.2 | 1.30 | 280.7 | 1.39 | 293.6 | 1.45 | 264.5 | 1.31 | 208   | 1.03 | 192.8 | 0.95 |
| A0A024R8  | Ubiquitinyl hydrolase 1 OS=  | 41.4  | 112.1 | 2.71 | 107.2 | 2.59 | 78.8  | 1.90 | 69.7  | 1.68 | 85.9  | 2.07 | 42.1  | 1.02 | 105.9 | 2.56 |
| O15162    | Phospholipid scramblase 1 (  | 154.9 | 205.7 | 1.33 | 163.4 | 1.05 | 106.6 | 0.69 | 181.5 | 1.17 | 210.2 | 1.36 | 132.2 | 0.85 | 135   | 0.87 |
| A0A0A0MT  | TATA-binding protein-asso    | 119.7 | 150.2 | 1.25 | 175.6 | 1.47 | 91.6  | 0.77 | 143.8 | 1.20 | 122.6 | 1.02 | 121.4 | 1.01 | 128.8 | 1.08 |
| A6NFX8    | ADP-sugar pyrophosphatase    | 29.5  | 46.1  | 1.56 | 39.3  | 1.33 | 35.6  | 1.21 | 37.6  | 1.27 | 40.7  | 1.38 | 36.5  | 1.24 | 34.2  | 1.16 |
| Q2M204    | HCG1642804, isoform CR       |       |       |      |       |      |       |      |       |      |       |      |       |      |       |      |
| H7BXI7    | Ly6/PLAUR domain-containi    | 26.6  | 25.9  | 0.97 | 23.7  | 0.89 | 18.6  | 0.70 | 31.7  | 1.19 | 27.9  | 1.05 | 23.4  | 0.88 | 30.1  | 1.13 |
| Q9UKR3    | Kallikrein-13 OS=Homo sap    |       |       |      |       |      |       |      |       |      |       |      |       |      |       |      |
| D6RH31    | Nephronectin (Fragment) O    | 231.7 | 184   | 0.79 | 165.7 | 0.72 | 166   | 0.72 | 194.7 | 0.84 | 211.6 | 0.91 | 215.6 | 0.93 | 190.8 | 0.82 |
| O60662    | Kelch-like protein 41 OS=H   | 188   | 206.4 | 1.10 | 201.9 | 1.07 | 144.9 | 0.77 | 184.8 | 0.98 | 165.7 | 0.88 | 83.2  | 0.44 | 100.6 | 0.54 |
| A0A087WU  | C-C motif chemokine 16 OS    |       |       |      |       |      |       |      |       |      |       |      |       |      |       |      |
| Q5HYA8    | Meckelin OS=Homo sapien      | 21.4  | 32.6  | 1.52 | 60.4  | 2.82 | 41.1  | 1.92 | 38.3  | 1.79 | 27.6  | 1.29 | 23.4  | 1.09 | 20.2  | 0.94 |
| Q96AM1    | Mas-related G-protein coup   | 34.8  | 27.7  | 0.80 | 26.4  | 0.76 | 25.6  | 0.74 | 31.8  | 0.91 | 32.9  | 0.95 | 30.5  | 0.88 | 29.3  | 0.84 |
| B3KQQ3    | cDNA PSEC0016 fis, clone     | 59.6  | 71.9  | 1.21 | 51.7  | 0.87 | 60.1  | 1.01 | 64.1  | 1.08 | 70.2  | 1.18 | 82    | 1.38 | 62.3  | 1.05 |
| Q9BQG1    | Synaptotagmin-3 OS=Homc      |       |       |      |       |      |       |      |       |      |       |      |       |      |       |      |
| O95445    | Apolipoprotein M OS=Hom      | 354.3 | 331.8 | 0.94 | 428.4 | 1.21 | 231.7 | 0.65 | 343.3 | 0.97 | 397.3 | 1.12 | 419.1 | 1.18 | 288   | 0.81 |
