# Supplementary material for: LC‐MS/MS‐Based Quantitative Proteomics Analysis of Different Stages of Non‐Small‐Cell Lung Cancer
Source: Hindawi journal article supplement (doi:10.1155/2021/5561569), 2021-01-01
Supplement: f4 [file 5561569.f4.pdf]

| Uniprot Acc | proteins                                         | 121       | 113       | ratio(113/121) | 114      | ratio(114/121) | 115       | ratio(115/121) | 116      | ratio(116/121) | 117       | ratio(117/121) | 118       | ratio(118/121) | 119       | ratio(119/121) |
|-------------|--------------------------------------------------|-----------|-----------|----------------|----------|----------------|-----------|----------------|----------|----------------|-----------|----------------|-----------|----------------|-----------|----------------|
| C0JYY2      | Apolipoprot                                      | 510456.9  | 587089.8  | 1.15           | 722432.2 | 1.42           | 577726.5  | 1.13           | 553022.3 | 1.08           | 631905.3  | 1.24           | 553297.9  | 1.08           | 487383.6  | 0.95           |
| V9HWA9      | Epididymis                                       | 1086362.4 | 1038495.5 | 0.96           | 987768   | 0.91           | 1014543.4 | 0.93           | 1059000  | 0.97           | 1036688.9 | 0.95           | 1058344.2 | 0.97           | 1125990.4 | 1.04           |
| A0A140TA    | Complement                                       | 10069.7   | 10298.9   | 1.02           | 11246.3  | 1.12           | 10190.4   | 1.01           | 9787.3   | 0.97           | 10555.8   | 1.05           | 9545.9    | 0.95           | 7018.6    | 0.70           |
| A0A140TA    | Complement C4-A OS=Homo sapiens GN=C4A PE=1 SV=1 |           |           |                |          |                |           |                |          |                |           |                |           |                |           |                |
| P0C0L4      | Complement                                       | 379640.7  | 354515.7  | 0.93           | 358550.6 | 0.94           | 353533.8  | 0.93           | 371096.1 | 0.98           | 369917.8  | 0.97           | 392042.8  | 1.03           | 352593.5  | 0.93           |
| A8K5A4      | cDNA FLJ7                                        | 181927.1  | 184669.2  | 1.02           | 167773   | 0.92           | 172794.9  | 0.95           | 189477.9 | 1.04           | 181011.4  | 0.99           | 192480.9  | 1.06           | 188787.6  | 1.04           |
| P08603      | Complement                                       | 127138.9  | 139326.8  | 1.10           | 138368.7 | 1.09           | 152055.5  | 1.20           | 147415.7 | 1.16           | 134161.2  | 1.06           | 124277.4  | 0.98           | 143670    | 1.13           |
| A8K5T0      | cDNA FLJ7                                        | 1595.6    | 2166.5    | 1.36           | 1478.4   | 0.93           | 1667      | 1.04           | 1764.5   | 1.11           | 1600.3    | 1.00           | 1443.2    | 0.90           | 1747.7    | 1.10           |
| Q7Z7Q0      | APOB prote                                       | 369.3     | 378.4     |                | 434.3    | 1.18           | 176       | 0.48           | 338.2    | 0.92           | 290.4     | 0.79           | 163       | 0.44           | 248.4     | 0.67           |
| E9PFZ2      | Ceruloplasm                                      | 232       | 305.6     | 1.32           | 1344.1   | 5.79           | 340.1     | 1.47           | 294.9    | 1.27           | 245.3     | 1.06           | 225.6     | 0.97           | 226.5     | 0.98           |
| P01023      | Alpha-2-mac                                      | 155893    | 159242.4  | 1.02           | 150022.1 | 0.96           | 148585.9  | 0.95           | 127199.8 | 0.82           | 139287.4  | 0.89           | 196290.4  | 1.26           | 150833.5  | 0.97           |
| B4E1Z4      | cDNA FLJ5                                        | 179991.2  | 168887.5  | 0.94           | 175330.4 | 0.97           | 170379.3  | 0.95           | 181366.8 | 1.01           | 186553.2  | 1.04           | 182496    | 1.01           | 179532.4  | 1.00           |
| P02768      | Serum album                                      | 374998.6  | 393627.8  | 1.05           | 415295.5 | 1.11           | 553515.2  | 1.48           | 401168.8 | 1.07           | 313800.8  | 0.84           | 273544.9  | 0.73           | 216497.6  | 0.58           |
| P00747      | Plasminoger                                      | 110712.8  | 123328    | 1.11           | 118392.6 | 1.07           | 116615.2  | 1.05           | 117254.4 | 1.06           | 115644.8  | 1.04           | 104325.5  | 0.94           | 105844.6  | 0.96           |
| P02790      | Hemopexin                                        | 407277.3  | 374618.6  | 0.92           | 386591   | 0.95           | 389342.2  | 0.96           | 396054.9 | 0.97           | 408398.8  | 1.00           | 392817.7  | 0.96           | 388013.2  | 0.95           |
| P00738      | Haptoglobin                                      | 185933.7  | 185102    | 1.00           | 162600.1 | 0.87           | 155639.9  | 0.84           | 279577.3 | 1.50           | 162525.6  | 0.87           | 258436.5  | 1.39           | 410792.3  | 2.21           |
| A0A024R3I   | Apolipoprot                                      | 411885.3  | 338583    | 0.82           | 381625.8 | 0.93           | 366565    | 0.89           | 373110.1 | 0.91           | 364223.9  | 0.88           | 375076    | 0.91           | 391751.5  | 0.95           |
| P00734      | Prothrombin                                      | 57305.1   | 69844.1   | 1.22           | 67971.2  | 1.19           | 72856.6   | 1.27           | 63897.5  | 1.12           | 65950.1   | 1.15           | 56143.8   | 0.98           | 58040.4   | 1.01           |
| B4E1C2      | Kininogen 1                                      | 131253.4  | 125717    | 0.96           | 122596.9 | 0.93           | 124775.5  | 0.95           | 130027.4 | 0.99           | 132243.9  | 1.01           | 130159.7  | 0.99           | 124968.7  | 0.95           |
| P01031      | Complement                                       | 93176.8   | 94890.7   | 1.02           | 90259.9  | 0.97           | 89862.7   | 0.96           | 87867    | 0.94           | 94067.8   | 1.01           | 91781.4   | 0.99           | 92978.4   | 1.00           |
| D3DNU8      | Kininogen 1                                      | 7787.9    | 6418.8    | 0.82           | 6744.1   | 0.87           | 6171.8    | 0.79           | 6016     | 0.77           | 6433      | 0.83           | 9059.8    | 1.16           | 8373.3    | 1.08           |
| B4E1B2      | cDNA FLJ5                                        | 83286.1   | 92039.8   | 1.11           | 81713.4  | 0.98           | 90197.9   | 1.08           | 70892.5  | 0.85           | 76534     | 0.92           | 83395     | 1.00           | 66649.1   | 0.80           |
| E9KL23      | Epididymis                                       | 6306.2    | 8613.5    | 1.37           | 5499.6   | 0.87           | 5387.8    | 0.85           | 4010.7   | 0.64           | 5925.8    | 0.94           | 6670.1    | 1.06           | 4887.9    | 0.78           |
| A0A024R6I   | Alpha-1-anti                                     | 165755.8  | 129336.8  | 0.78           | 145830.8 | 0.88           | 133687.4  | 0.81           | 163476   | 0.99           | 143911.9  | 0.87           | 158637.4  | 0.96           | 254797.8  | 1.54           |
| A0A0K0K1    | Epididymis                                       | 866.1     | 905.6     | 1.05           | 975.5    | 1.13           | 1107.8    | 1.28           | 873      | 1.01           | 818.1     | 0.94           | 1068.3    | 1.23           | 849.7     | 0.98           |
| D6RF35      | Vitamin D-b                                      | 203990.6  | 191458.5  | 0.94           | 193095.1 | 0.95           | 175613.7  | 0.86           | 171725   | 0.84           | 181511.4  | 0.89           | 200116.5  | 0.98           | 203654.9  | 1.00           |
| V9HWI6      | Epididymis                                       | 1938.8    | 1493.4    | 0.77           | 1742     | 0.90           | 1355.4    | 0.70           | 1572.2   | 0.81           | 2818.7    | 1.45           | 2236      | 1.15           | 1573.4    | 0.81           |
| D3DRR6      | Inter-alpha (                                    | 108810.6  | 108481.7  | 1.00           | 98996.5  | 0.91           | 99369.2   | 0.91           | 94019.8  | 0.86           | 105151.6  | 0.97           | 106137.5  | 0.98           | 95323.2   | 0.88           |
| B2RMS9      | Inter-alpha (                                    | 104677.5  | 108110.8  | 1.03           | 103576.1 | 0.99           | 102139.3  | 0.98           | 101346.1 | 0.97           | 109288.1  | 1.04           | 106762.4  | 1.02           | 106066.8  | 1.01           |
| A8K2T4      | cDNA FLJ7                                        | 34968     | 39819.6   | 1.14           | 35815.5  | 1.02           | 37899.4   | 1.08           | 38127.9  | 1.09           | 37936.9   | 1.08           | 36598.8   | 1.05           | 35816.4   | 1.02           |
| B7Z539      | cDNA FLJ5                                        | 53820     | 54625.6   | 1.01           | 50116.6  | 0.93           | 55433.1   | 1.03           | 58397.6  | 1.09           | 56789.4   | 1.06           | 51279.7   | 0.95           | 46599.2   | 0.87           |
| P06727      | Apolipoprot                                      | 132070.1  | 121784.2  | 0.92           | 122790   | 0.93           | 118549.5  | 0.90           | 111855.3 | 0.85           | 125959.3  | 0.95           | 118246.5  | 0.90           | 98547     | 0.75           |
| P04003      | C4b-binding                                      | 89101.1   | 98140.4   | 1.10           | 87061.7  | 0.98           | 94314.1   | 1.06           | 96031.3  | 1.08           | 95727.1   | 1.07           | 96432.8   | 1.08           | 93592.4   | 1.05           |
| B2R6W1      | cDNA, FLJ5                                       | 340       | 467.6     | 1.38           | 371.3    | 1.09           | 403.2     | 1.19           | 355.5    | 1.05           | 366.1     | 1.08           | 384.4     | 1.13           | 402.6     | 1.18           |
| B4E1D8      | cDNA FLJ5                                        | 356.1     | 419.3     | 1.18           | 405.5    | 1.14           | 393       | 1.10           | 441.7    | 1.24           | 454.7     | 1.28           | 390.7     | 1.10           | 344.8     | 0.97           |
| P00739      | Haptoglobin                                      | 2635.5    | 2606.9    | 0.99           | 2512.7   | 0.95           | 2255.3    | 0.86           | 2714.9   | 1.03           | 2471.1    | 0.94           | 3397.7    | 1.29           | 4403      | 1.67           |
| B7Z1F8      | cDNA FLJ5                                        | 5945      | 6148.8    | 1.03           | 5133     | 0.86           | 6345.8    | 1.07           | 5999.2   | 1.01           | 5232.9    | 0.88           | 5756.8    | 0.97           | 5222.4    | 0.88           |
| P06396      | Gelsolin OS                                      | 53072.9   | 51360.2   | 0.97           | 48208.4  | 0.91           | 50016.7   | 0.94           | 46518.3  | 0.88           | 50644.9   | 0.95           | 50760.1   | 0.96           | 44495     | 0.84           |
| D9IWP9      | Beta-2-glycc                                     | 95095.7   | 95869.3   | 1.01           | 94684.3  | 1.00           | 92089.5   | 0.97           | 92442.1  | 0.97           | 97157.4   | 1.02           | 95290.3   | 1.00           | 97045.8   | 1.02           |
| A0A024R94   | Serpin pepti                                     | 76446.5   | 81924     | 1.07           | 75341.2  | 0.99           | 73519.1   | 0.96           | 66972.7  | 0.88           | 79640.7   | 1.04           | 77286.2   | 1.01           | 59152.2   | 0.77           |
| B3KS79      | cDNA FLJ3                                        | 99858     | 93851     | 0.94           | 98190.2  | 0.98           | 91704     | 0.92           | 98831.5  | 0.99           | 103081.2  | 1.03           | 95366.8   | 0.96           | 132515.7  | 1.33           |
| P13671      | Complement                                       | 34641.2   | 36577.2   | 1.06           | 33403.3  | 0.96           | 34161.9   | 0.99           | 36176    | 1.04           | 36281.2   | 1.05           | 33438.1   | 0.97           | 34559.2   | 1.00           |
| E9PGN7      | Plasma prote                                     | 110273.8  | 100248.8  | 0.91           | 112257.1 | 1.02           | 98724.4   | 0.90           | 106678.1 | 0.97           | 114992.3  | 1.04           | 110430.4  | 1.00           | 101300.1  | 0.92           |
| P02760      | Protein AMI                                      | 38024     | 40442     | 1.06           | 36134.6  | 0.95           | 39749.4   | 1.05           | 40433.6  | 1.06           | 41020     | 1.08           | 38398     | 1.01           | 34490.9   | 0.91           |
| A8K8Z4      | cDNA FLJ7                                        | 91.7      | 91.3      | 1.00           | 102.6    | 1.12           | 84.4      | 0.92           | 91.7     | 1.00           | 76        | 0.83           | 104.5     | 1.14           | 85.7      | 0.93           |
| B2R8I2      | cDNA, FLJ5                                       | 53687.5   | 56488.4   | 1.05           | 55925.9  | 1.04           | 42986.9   | 0.80           | 48963.1  | 0.91           | 56480.5   | 1.05           | 61840.2   | 1.15           | 50180     | 0.93           |

|           |                                             |         |         |      |         |      |         |      |         |      |         |      |         |      |         |      |
|-----------|---------------------------------------------|---------|---------|------|---------|------|---------|------|---------|------|---------|------|---------|------|---------|------|
| H0YAC1    | Plasma kallikrein                           | 33082.6 | 34217.8 | 1.03 | 32918   | 1.00 | 34183.6 | 1.03 | 32889.7 | 0.99 | 34399   | 1.04 | 32603.1 | 0.99 | 29661.8 | 0.90 |
| P04196    | Histidine-rich glycoprotein                 | 661.8   | 866.1   | 1.31 | 992.4   | 1.50 | 590.2   | 0.89 | 622.6   | 0.94 | 688.2   | 1.04 | 799.8   | 1.21 | 706.1   | 1.07 |
| P07358    | Complement factor D                         | 25346.9 | 24943.9 | 0.98 | 24633.6 | 0.97 | 24581.7 | 0.97 | 24823.5 | 0.98 | 24915.6 | 0.98 | 24972.2 | 0.99 | 23582.2 | 0.93 |
| P43652    | Afamin OS=                                  | 60761.3 | 62649.1 | 1.03 | 58267.1 | 0.96 | 59622.5 | 0.98 | 58119.3 | 0.96 | 61682.8 | 1.02 | 62913.2 | 1.04 | 54287.5 | 0.89 |
| P06681    | Complement factor B                         | 5096.4  | 5761.7  | 1.13 | 5226.7  | 1.03 | 5861.4  | 1.15 | 5486.3  | 1.08 | 5452.7  | 1.07 | 5408.6  | 1.06 | 5137.8  | 1.01 |
| P04275    | von Willebrand factor                       | 10196   | 13089.5 | 1.28 | 11473.5 | 1.13 | 12553.1 | 1.23 | 13082   | 1.28 | 13206.5 | 1.30 | 13496.9 | 1.32 | 11111.4 | 1.09 |
| A0A024R9C | Thrombospondin-1                            | 21666.3 | 26614.2 | 1.23 | 21742.9 | 1.00 | 25643.9 | 1.18 | 21725   | 1.00 | 27021.2 | 1.25 | 22529.8 | 1.04 | 20044.7 | 0.93 |
| P07996    | Thrombospondin-1                            | 392.8   | 557.4   | 1.42 | 499.6   | 1.27 | 559     | 1.42 | 467     | 1.19 | 606.6   | 1.54 | 606.1   | 1.54 | 458.5   | 1.17 |
| P10909    | Clusterin OS=                               | 33598.7 | 50095.5 | 1.49 | 45302.4 | 1.35 | 48175.9 | 1.43 | 48440.7 | 1.44 | 47018.7 | 1.40 | 34883.3 | 1.04 | 34107.1 | 1.02 |
| O75882    | Attractin OS=                               | 25522.8 | 27658.2 | 1.08 | 25777.2 | 1.01 | 25986.1 | 1.02 | 25151.2 | 0.99 | 26915.2 | 1.05 | 24672.1 | 0.97 | 23733.1 | 0.93 |
| E7ETH0    | Complement factor D                         | 26360   | 28620.6 | 1.09 | 26667.1 | 1.01 | 27252.9 | 1.03 | 26287.2 | 1.00 | 27657.8 | 1.05 | 25695.2 | 0.97 | 27742.1 | 1.05 |
| L8E853    | von Willebrand factor                       |         |         |      |         |      |         |      |         |      |         |      |         |      |         |      |
| B3KNX0    | cDNA FLJ37966                               | 24353   | 27673.9 | 1.14 | 25972.1 | 1.07 | 24866.1 | 1.02 | 26889   | 1.10 | 25674.2 | 1.05 | 23715.2 | 0.97 | 25775   | 1.06 |
| A0A024R46 | Fibronectin                                 | 8653    | 14350.7 | 1.66 | 12920.5 | 1.49 | 17208   | 1.99 | 13008.3 | 1.50 | 18122.1 | 2.09 | 8789.5  | 1.02 | 7557    | 0.87 |
| B4DPQ0    | Complement factor D                         | 27059.9 | 29398.6 | 1.09 | 29623.9 | 1.09 | 30198.6 | 1.12 | 30114.2 | 1.11 | 28399.3 | 1.05 | 25563.7 | 0.94 | 28589.3 | 1.06 |
| P02649    | Apolipoprotein A-II                         | 54616   | 60795.2 | 1.11 | 53606.3 | 0.98 | 61843.3 | 1.13 | 62405.6 | 1.14 | 66560.6 | 1.22 | 58524.1 | 1.07 | 55467.3 | 1.02 |
| P07357    | Complement factor D                         | 19863.5 | 21076   | 1.06 | 19665.2 | 0.99 | 20194.4 | 1.02 | 19189.5 | 0.97 | 20228.2 | 1.02 | 19921.3 | 1.00 | 19774.3 | 1.00 |
| A0A024R03 | Complement factor D                         | 31276.8 | 28186.5 | 0.90 | 29862.6 | 0.95 | 26992.6 | 0.86 | 31248.7 | 1.00 | 30833.4 | 0.99 | 31964.7 | 1.02 | 39963.3 | 1.28 |
| Q6LAM1    | Heavy chain of IgG1                         | 7000    | 5884.2  | 0.84 | 5922.3  | 0.85 | 5458.6  | 0.78 | 5879.3  | 0.84 | 6019    | 0.86 | 6552.1  | 0.94 | 9038.4  | 1.29 |
| P05546    | Heparin cofactor II                         | 40235.4 | 42058.8 | 1.05 | 39849.4 | 0.99 | 38495   | 0.96 | 41473.5 | 1.03 | 42452   | 1.06 | 44464.2 | 1.11 | 39529.8 | 0.98 |
| Q9UNU2    | Complement factor D                         | 2086.8  | 2438.3  | 1.17 | 2216    | 1.06 | 2211.7  | 1.06 | 1819.1  | 0.87 | 2243    | 1.07 | 1953.8  | 0.94 | 2485    | 1.19 |
| V9HWD8    | Epididymis protein 1                        | 87354.8 | 85465.5 | 0.98 | 85173.4 | 0.98 | 82675.7 | 0.95 | 85248.3 | 0.98 | 87032.2 | 1.00 | 83186   | 0.95 | 82018.4 | 0.94 |
| A0A0S2Z4I | Protein S isoform 1                         | 20335.7 | 20521.9 | 1.01 | 19479.9 | 0.96 | 20695.3 | 1.02 | 18904.4 | 0.93 | 20998.2 | 1.03 | 20174.6 | 0.99 | 20330.7 | 1.00 |
| D9ZGG2    | Vitronectin                                 | 45241.8 | 47676.1 | 1.05 | 42103.8 | 0.93 | 50280.8 | 1.11 | 50872   | 1.12 | 50370.3 | 1.11 | 44782.5 | 0.99 | 40512.9 | 0.90 |
| B7Z8Q2    | cDNA FLJ37966                               | 78902.1 | 72510.6 | 0.92 | 71430.7 | 0.91 | 69072.4 | 0.88 | 68315.1 | 0.87 | 75454.7 | 0.96 | 69386.5 | 0.88 | 66683.6 | 0.85 |
| D9YZU5    | Beta-globin                                 | 26416.6 | 26762   | 1.01 | 25508.7 | 0.97 | 21785.1 | 0.82 | 27519.4 | 1.04 | 20787.3 | 0.79 | 30161.5 | 1.14 | 30166.4 | 1.14 |
| B7Z8B6    | cDNA FLJ37966                               | 3715.2  | 4851.3  | 1.31 | 3182.4  | 0.86 | 3426.6  | 0.92 | 2914.7  | 0.78 | 3116.9  | 0.84 | 4486.4  | 1.21 | 3978.8  | 1.07 |
| A0A1B0GU  | Ig mu chain                                 | 41758.8 | 33261.6 | 0.80 | 33963.5 | 0.81 | 33291.6 | 0.80 | 31512.1 | 0.75 | 39637.9 | 0.95 | 55273.6 | 1.32 | 42527.6 | 1.02 |
| B2R950    | cDNA, FLJ37966                              | 2893    | 2645.4  | 0.91 | 2669.2  | 0.92 | 2807.5  | 0.97 | 2688    | 0.93 | 3024    | 1.05 | 2831.3  | 0.98 | 3108.6  | 1.07 |
| Q96PD5    | N-acetylmuramidase 2B                       | 18131.8 | 20449.1 | 1.13 | 16845.4 | 0.93 | 17634.1 | 0.97 | 17893.7 | 0.99 | 18152.3 | 1.00 | 17621.4 | 0.97 | 16026.7 | 0.88 |
| P02763    | Alpha-1-acid glycoprotein 1                 | 21588.2 | 20978.4 | 0.97 | 23424.7 | 1.09 | 17359   | 0.80 | 26223.1 | 1.21 | 21535.6 | 1.00 | 24203.1 | 1.12 | 45114   | 2.09 |
| B0AZL7    | cDNA, FLJ37966                              | 18319.3 | 22324.3 | 1.22 | 19098.3 | 1.04 | 20124.5 | 1.10 | 19414.7 | 1.06 | 21036   | 1.15 | 19426.1 | 1.06 | 16382.5 | 0.89 |
| B2R815    | cDNA, FLJ37966                              | 18523.7 | 20326.1 | 1.10 | 19314.7 | 1.04 | 17136.1 | 0.93 | 15861.9 | 0.86 | 19134.1 | 1.03 | 18435.3 | 1.00 | 13815.6 | 0.75 |
| P08697    | Alpha-2-antiplasmin                         | 16208.5 | 15568.9 | 0.96 | 15471.1 | 0.95 | 16057.6 | 0.99 | 15651.7 | 0.97 | 15778.6 | 0.97 | 15332.5 | 0.95 | 15477.2 | 0.95 |
| P25311    | Zinc-alpha-2-glycoprotein                   | 22823.9 | 24197   | 1.06 | 22776.3 | 1.00 | 22025   | 0.96 | 20191.2 | 0.88 | 24868.6 | 1.09 | 21172.2 | 0.93 | 17749   | 0.78 |
| Q86TT1    | Full-length cDNA                            | 628.3   | 731.5   | 1.16 | 612.5   | 0.97 | 656.3   | 1.04 | 623.5   | 0.99 | 686.7   | 1.09 | 818     | 1.30 | 646.6   | 1.03 |
| V9HW68    | Epididymis protein 1                        | 14318   | 14200.7 | 0.99 | 13471.4 | 0.94 | 14091.7 | 0.98 | 14781.3 | 1.03 | 14841.2 | 1.04 | 12780.1 | 0.89 | 15179.6 | 1.06 |
| Q06033    | Inter-alpha-trypsin inhibitor heavy chain 1 | 12468.4 | 13567.8 | 1.09 | 12959.8 | 1.04 | 12149.5 | 0.97 | 12249.6 | 0.98 | 12309.6 | 0.99 | 12294.9 | 0.99 | 12842.5 | 1.03 |
| P80108    | Phosphatidylinositol 3-kinase               | 9864.1  | 11082   | 1.12 | 10784.2 | 1.09 | 10919.1 | 1.11 | 10552.3 | 1.07 | 10448.7 | 1.06 | 10629.6 | 1.08 | 9586.6  | 0.97 |
| P07360    | Complement factor D                         | 10063.5 | 10529.2 | 1.05 | 9986.8  | 0.99 | 10975.9 | 1.09 | 10507.7 | 1.04 | 10028.2 | 1.00 | 10438.8 | 1.04 | 9234.4  | 0.92 |
| P22792    | Carboxypeptidase Y                          | 16767.1 | 18835.2 | 1.12 | 18865.2 | 1.13 | 17056.8 | 1.02 | 16192.8 | 0.97 | 17940.2 | 1.07 | 16797.5 | 1.00 | 14238.6 | 0.85 |
| A0A140VK  | Testis tissue                               | 22611   | 25131.6 | 1.11 | 22440.4 | 0.99 | 22366.6 | 0.99 | 20490.3 | 0.91 | 23660.7 | 1.05 | 22065.7 | 0.98 | 21306.7 | 0.94 |
| P51884    | Lumican OS=                                 | 21478.9 | 21871.6 | 1.02 | 20178.2 | 0.94 | 20998.2 | 0.98 | 20168.7 | 0.94 | 21854.5 | 1.02 | 20957.9 | 0.98 | 18878.5 | 0.88 |
| A0A0A0MF  | Coagulation factor XIII                     | 6480.2  | 8192.9  | 1.26 | 7006.1  | 1.08 | 7385.3  | 1.14 | 6954.2  | 1.07 | 8063.6  | 1.24 | 6384.5  | 0.99 | 6217.3  | 0.96 |
| Q59EP2    | Angiotensinogen                             | 24089.4 | 24341.2 | 1.01 | 23979.5 | 1.00 | 23177.3 | 0.96 | 23539.2 | 0.98 | 25181.7 | 1.05 | 23425   | 0.97 | 22223.6 | 0.92 |
| B2R582    | cDNA, FLJ37966                              | 798     | 921.9   | 1.16 | 782     | 0.98 | 830.3   | 1.04 | 714.9   | 0.90 | 798.1   | 1.00 | 808.3   | 1.01 | 819.5   | 1.03 |
| Q4TZM4    | Hemoglobin                                  | 1332.1  | 1405    | 1.05 | 1277.4  | 0.96 | 979.5   | 0.74 | 1322.2  | 0.99 | 935.1   | 0.70 | 1697.9  | 1.27 | 1700.3  | 1.28 |

|           |               |         |         |      |         |      |         |      |         |      |         |      |         |      |         |      |
|-----------|---------------|---------|---------|------|---------|------|---------|------|---------|------|---------|------|---------|------|---------|------|
| Q6MZQ6    | Putative unc  |         |         |      |         |      |         |      |         |      |         |      |         |      |         |      |
| P27169    | Serum parac   | 26425.9 | 24841.5 | 0.94 | 26246   | 0.99 | 25042.9 | 0.95 | 24302   | 0.92 | 27227.6 | 1.03 | 26242.8 | 0.99 | 22453.9 | 0.85 |
| D6RF20    | Vitamin D-b   | 24.1    | 28.9    | 1.20 | 18.6    | 0.77 | 31.5    | 1.31 | 25.4    | 1.05 | 23.9    | 0.99 | 27.1    | 1.12 | 21.2    | 0.88 |
| Q96K68    | cDNA FLJ1     | 9509.7  | 9530.9  | 1.00 | 9767.8  | 1.03 | 10313.7 | 1.08 | 9694.6  | 1.02 | 9181.8  | 0.97 | 9114    | 0.96 | 12195.3 | 1.28 |
| G3XAK1    | Hepatocyte g  | 6404.4  | 6901.6  | 1.08 | 6318.4  | 0.99 | 6943.5  | 1.08 | 6491.8  | 1.01 | 6537.2  | 1.02 | 5956.3  | 0.93 | 5849.2  | 0.91 |
| A0A024R2C | C-type lectin | 7606    | 8337.9  | 1.10 | 7454.1  | 0.98 | 7456.1  | 0.98 | 6832.4  | 0.90 | 8007.7  | 1.05 | 7034    | 0.92 | 6269.8  | 0.82 |
| B2R9F2    | cDNA, FLJ5    | 21182.2 | 24324.2 | 1.15 | 24773.4 | 1.17 | 18653.9 | 0.88 | 20418.2 | 0.96 | 23084.3 | 1.09 | 23221.8 | 1.10 | 21849.1 | 1.03 |
| P05543    | Thyroxine-b   | 10522.1 | 10969   | 1.04 | 11223.3 | 1.07 | 10323.5 | 0.98 | 10070   | 0.96 | 11408.6 | 1.08 | 11465.7 | 1.09 | 10219.8 | 0.97 |
| A0N071    | Delta globin  | 110.6   | 124.5   | 1.13 | 109     | 0.99 | 104.9   | 0.95 | 128.9   | 1.17 | 97.3    | 0.88 | 127.9   | 1.16 | 133     | 1.20 |
| P02753    | Retinol-bind  | 33157.6 | 34673.7 | 1.05 | 31209.4 | 0.94 | 35599.5 | 1.07 | 34712.9 | 1.05 | 35446.5 | 1.07 | 33435.2 | 1.01 | 27320.1 | 0.82 |
| C9JF17    | Apolipoprot   | 24386.8 | 26206.3 | 1.07 | 26020.4 | 1.07 | 27458.5 | 1.13 | 23217.7 | 0.95 | 27609.1 | 1.13 | 23713.6 | 0.97 | 21141.3 | 0.87 |
| A8K1K1    | cDNA FLJ7     | 6742.3  | 7542.4  | 1.12 | 7262.6  | 1.08 | 7434.9  | 1.10 | 6611.6  | 0.98 | 6953.1  | 1.03 | 6538.6  | 0.97 | 5646.1  | 0.84 |
| A0A1K0GX  | Globin C1 C   | 14723.1 | 14157.8 | 0.96 | 14141.1 | 0.96 | 9465.6  | 0.64 | 14883   | 1.01 | 10905.9 | 0.74 | 15034.8 | 1.02 | 18249.7 | 1.24 |
| D6RAR4    | Hepatocyte g  | 76.6    | 88.7    | 1.16 | 66.5    | 0.87 | 89.3    | 1.17 | 80.3    | 1.05 | 82.1    | 1.07 | 88.3    | 1.15 | 60.3    | 0.79 |
| Q16610    | Extracellular | 4476.7  | 4777.3  | 1.07 | 4009.6  | 0.90 | 4909.4  | 1.10 | 4730.8  | 1.06 | 4439.4  | 0.99 | 4352.6  | 0.97 | 3766.9  | 0.84 |
| Q04756    | Hepatocyte g  | 6012.3  | 6577.1  | 1.09 | 5836.5  | 0.97 | 6665.3  | 1.11 | 5873.9  | 0.98 | 6133.9  | 1.02 | 5968.9  | 0.99 | 5362    | 0.89 |
| Q8TCD0    | Uncharacter   | 466.9   | 415.3   | 0.89 | 418.3   | 0.90 | 400.5   | 0.86 | 341.9   | 0.73 | 406.3   | 0.87 | 519.1   | 1.11 | 440.6   | 0.94 |
| P03951    | Coagulation   | 4345.1  | 5192.9  | 1.20 | 4314.6  | 0.99 | 4788.6  | 1.10 | 4719.5  | 1.09 | 4850.2  | 1.12 | 4739    | 1.09 | 4267.9  | 0.98 |
| Q03591    | Complemen     | 1223.8  | 1251.5  | 1.02 | 1403.4  | 1.15 | 1466.7  | 1.20 | 1296.1  | 1.06 | 1136.9  | 0.93 | 1164.7  | 0.95 | 1201    | 0.98 |
| A0A0S2Z3  | Lectin galac  | 6950.6  | 7320.9  | 1.05 | 6436    | 0.93 | 6925.7  | 1.00 | 6615.1  | 0.95 | 6572.9  | 0.95 | 8034.7  | 1.16 | 8214.9  | 1.18 |
| Q6PIL8    | IGK@ prote    | 7153.1  | 7606.5  | 1.06 | 6323.7  | 0.88 | 5824.9  | 0.81 | 5681    | 0.79 | 5845.4  | 0.82 | 8047.9  | 1.13 | 8245.1  | 1.15 |
| P02746    | Complemen     | 8644    | 8778.3  | 1.02 | 8648.3  | 1.00 | 9690.7  | 1.12 | 9963.4  | 1.15 | 8865    | 1.03 | 8777.6  | 1.02 | 8280.1  | 0.96 |
| A0A096LPI | Protein SAA   | 10462.9 | 10688.6 | 1.02 | 10717.2 | 1.02 | 11896   | 1.14 | 12038.4 | 1.15 | 11679.4 | 1.12 | 11065.4 | 1.06 | 11844.1 | 1.13 |
| Q6MZU6    | Putative unc  | 3853.2  | 4359    | 1.13 | 3634.2  | 0.94 | 4226.4  | 1.10 | 4274.9  | 1.11 | 4095.3  | 1.06 | 3280.3  | 0.85 | 3843.7  | 1.00 |
| P02750    | Leucine-rich  | 20434.1 | 19280.5 | 0.94 | 19204.6 | 0.94 | 19544.7 | 0.96 | 22329.2 | 1.09 | 19626.4 | 0.96 | 21509.2 | 1.05 | 27178.7 | 1.33 |
| P48740    | Mannan-bin    | 5616.9  | 7116.6  | 1.27 | 6236    | 1.11 | 6539.9  | 1.16 | 6207.5  | 1.11 | 6035.4  | 1.07 | 6160.2  | 1.10 | 5467.1  | 0.97 |
| P02775    | Platelet basi | 15640.4 | 17782.9 | 1.14 | 15010.3 | 0.96 | 17397.2 | 1.11 | 17472.2 | 1.12 | 19286.4 | 1.23 | 15447.8 | 0.99 | 15413.3 | 0.99 |
| A6XNE2    | Complemen     | 3098.3  | 3661.6  | 1.18 | 3079    | 0.99 | 3909.2  | 1.26 | 4144.5  | 1.34 | 3542.2  | 1.14 | 3244.9  | 1.05 | 2871.5  | 0.93 |
| P02747    | Complemen     | 8282.3  | 8248.2  | 1.00 | 8431.2  | 1.02 | 8152.3  | 0.98 | 8062.2  | 0.97 | 7885.1  | 0.95 | 7807.7  | 0.94 | 8072.6  | 0.97 |
| P15169    | Carboxypep    | 6584.9  | 6941.6  | 1.05 | 6477.7  | 0.98 | 7257    | 1.10 | 7312.7  | 1.11 | 7140.8  | 1.08 | 6848.2  | 1.04 | 6112.5  | 0.93 |
| P00742    | Coagulation   | 8124.9  | 8976.6  | 1.10 | 8245.7  | 1.01 | 8527.9  | 1.05 | 8393.9  | 1.03 | 8808    | 1.08 | 7701.3  | 0.95 | 7101.8  | 0.87 |
| P19652    | Alpha-1-acic  | 19263.5 | 19165   | 0.99 | 20571.4 | 1.07 | 17406.3 | 0.90 | 19854.6 | 1.03 | 18726.5 | 0.97 | 18554.9 | 0.96 | 27901.1 | 1.45 |
| Q14520    | Hyaluronan-   | 11039.1 | 11316.7 | 1.03 | 10532.6 | 0.95 | 11084.5 | 1.00 | 11173.5 | 1.01 | 11337.9 | 1.03 | 10612   | 0.96 | 10238.1 | 0.93 |
| F2RM37    | Coagulation   | 6388.3  | 6699.2  | 1.05 | 6153.5  | 0.96 | 6191.1  | 0.97 | 6563.2  | 1.03 | 6383.7  | 1.00 | 6621.1  | 1.04 | 6072.5  | 0.95 |
| Q96IY4    | Carboxypep    | 11789.6 | 12269.4 | 1.04 | 11550.9 | 0.98 | 13003.2 | 1.10 | 12811.5 | 1.09 | 12370   | 1.05 | 12796.3 | 1.09 | 10423.8 | 0.88 |
| A2NUT2    | Lambda-cha    | 14755.2 | 15187.4 | 1.03 | 14275.1 | 0.97 | 15722.5 | 1.07 | 15169.7 | 1.03 | 16572.9 | 1.12 | 14111.3 | 0.96 | 15719   | 1.07 |
| O75636    | Ficolin-3 OS  | 15367.2 | 17638.8 | 1.15 | 18165.6 | 1.18 | 16665   | 1.08 | 14385.8 | 0.94 | 16004   | 1.04 | 16769.9 | 1.09 | 14579.7 | 0.95 |
| Q9NPP6    | Immunoglot    | 439.2   | 454.8   | 1.04 | 457.1   | 1.04 | 412.1   | 0.94 | 401.7   | 0.91 | 470.5   | 1.07 | 460.3   | 1.05 | 526.6   | 1.20 |
| Q567P1    | IGL@ protei   | 1174.7  | 1092.4  | 0.93 | 1442.3  | 1.23 | 1467.9  | 1.25 | 1287.8  | 1.10 | 1469.6  | 1.25 | 959     | 0.82 | 1225    | 1.04 |
| A0A024R6  | Serpin pepti  | 3529    | 4175.3  | 1.18 | 3766.7  | 1.07 | 4461.6  | 1.26 | 4485.9  | 1.27 | 4064    | 1.15 | 4083.4  | 1.16 | 2912.8  | 0.83 |
| H6VRG1    | Keratin 1 OS  | 2159.3  | 3451.6  | 1.60 | 3228.1  | 1.49 | 2797.8  | 1.30 | 3184.2  | 1.47 | 3565.9  | 1.65 | 2341.6  | 1.08 | 2726    | 1.26 |
| A0A0R7FJ  | Coagulation   | 2366.7  | 2998.3  | 1.27 | 2976.7  | 1.26 | 2986.4  | 1.26 | 2883.8  | 1.22 | 2602.2  | 1.10 | 2378.2  | 1.00 | 2213.3  | 0.94 |
| P20851    | C4b-binding   | 8738.8  | 9027.5  | 1.03 | 8504    | 0.97 | 9754.4  | 1.12 | 9465.3  | 1.08 | 9543.2  | 1.09 | 9385.3  | 1.07 | 9386.6  | 1.07 |
| P63261    | Actin, cytop  | 3679    | 5034.2  | 1.37 | 4421.8  | 1.20 | 4569    | 1.24 | 4498.6  | 1.22 | 4666.4  | 1.27 | 4301.8  | 1.17 | 3602.9  | 0.98 |
| S6AWE6    | IgG L chain   | 443.9   | 446.9   | 1.01 | 440.7   | 0.99 | 498.9   | 1.12 | 495.6   | 1.12 | 479.3   | 1.08 | 490     | 1.10 | 532     | 1.20 |
| A0A024R0  | Apolipoprot   | 20202.7 | 21308.9 | 1.05 | 26544.7 | 1.31 | 20263.1 | 1.00 | 17356.9 | 0.86 | 22290.7 | 1.10 | 21967.1 | 1.09 | 21581   | 1.07 |
| O00391    | Sulfhydryl o  | 2526.4  | 3092.7  | 1.22 | 2603.2  | 1.03 | 2911.4  | 1.15 | 2915    | 1.15 | 2811.2  | 1.11 | 2625.9  | 1.04 | 2246.1  | 0.89 |

|           |               |         |         |      |         |      |         |      |         |      |         |      |         |      |         |      |
|-----------|---------------|---------|---------|------|---------|------|---------|------|---------|------|---------|------|---------|------|---------|------|
| P02743    | Serum amyl    | 12930.8 | 13581.8 | 1.05 | 12697.6 | 0.98 | 13609.2 | 1.05 | 12915.9 | 1.00 | 14808.5 | 1.15 | 11096.7 | 0.86 | 9575.8  | 0.74 |
| P02776    | Platelet fact | 7708.1  | 7328    | 0.95 | 14120.9 | 1.83 | 14224.7 | 1.85 | 9230.1  | 1.20 | 9519.2  | 1.23 | 9673.7  | 1.26 | 7847.5  | 1.02 |
| P09172    | Dopamine b    | 2072.2  | 2206.3  | 1.06 | 2263.1  | 1.09 | 2213    | 1.07 | 2303    | 1.11 | 1895.8  | 0.91 | 2180.4  | 1.05 | 1778.4  | 0.86 |
| P43251    | Biotinidase   | 3353.8  | 4160.3  | 1.24 | 3812.2  | 1.14 | 3998.6  | 1.19 | 3618    | 1.08 | 3739.1  | 1.11 | 3523.6  | 1.05 | 2741.5  | 0.82 |
| P17936    | Insulin-like  | 5061.2  | 5551.8  | 1.10 | 4713.9  | 0.93 | 4955.8  | 0.98 | 5015.6  | 0.99 | 5662.5  | 1.12 | 5154.3  | 1.02 | 4313.3  | 0.85 |
| A6XGL1    | Transthyreti  | 6699.7  | 7120.2  | 1.06 | 5982.7  | 0.89 | 6096.6  | 0.91 | 5738.3  | 0.86 | 6744    | 1.01 | 7894.5  | 1.18 | 6887.9  | 1.03 |
| V9GYM3    | Apolipoprot   | 58257.6 | 44115.6 | 0.76 | 54074.9 | 0.93 | 48466.6 | 0.83 | 40529.6 | 0.70 | 47555   | 0.82 | 51115.9 | 0.88 | 44102   | 0.76 |
| B4DPQ3    | cDNA FLJ5     | 3019.2  | 3156    | 1.05 | 2875.5  | 0.95 | 3008.6  | 1.00 | 3181.3  | 1.05 | 3251    | 1.08 | 3124.7  | 1.03 | 2837.3  | 0.94 |
| Q1HP67    | Lipoprotein,  | 4008    | 3572.9  | 0.89 | 3229.5  | 0.81 | 5065.3  | 1.26 | 3792.2  | 0.95 | 3698.1  | 0.92 | 3973.9  | 0.99 | 3843.8  | 0.96 |
| B2R888    | Monocyte di   | 1767.4  | 2126.2  | 1.20 | 1838    | 1.04 | 2245    | 1.27 | 2263    | 1.28 | 2124.1  | 1.20 | 1927.7  | 1.09 | 1746.3  | 0.99 |
| Q6GMV7    | Uncharacter   | 874.1   | 719.1   | 0.82 | 817     | 0.93 | 835.9   | 0.96 | 834.4   | 0.95 | 988     | 1.13 | 992.9   | 1.14 | 973.6   | 1.11 |
| P13645    | Keratin, typ  | 4187.6  | 6299.9  | 1.50 | 5141.4  | 1.23 | 5083.2  | 1.21 | 5122.4  | 1.22 | 5879.9  | 1.40 | 4691.1  | 1.12 | 4037.6  | 0.96 |
| A0A024R1C | Apolipoprot   | 5734.4  | 6244    | 1.09 | 5517.6  | 0.96 | 7231.8  | 1.26 | 5956.6  | 1.04 | 5785.2  | 1.01 | 6265    | 1.09 | 6103    | 1.06 |
| P36980    | Complemen     | 655.8   | 697.3   | 1.06 | 723     | 1.10 | 663.2   | 1.01 | 683.4   | 1.04 | 651.3   | 0.99 | 658.5   | 1.00 | 640.3   | 0.98 |
| O95445    | Apolipoprot   | 8414.8  | 8296.5  | 0.99 | 9042    | 1.07 | 8840.9  | 1.05 | 8126.8  | 0.97 | 8617.6  | 1.02 | 8163.2  | 0.97 | 7562.5  | 0.90 |
| Q6MZX7    | Putative unc  | 1228.3  | 1342.6  | 1.09 | 1183.7  | 0.96 | 1099.8  | 0.90 | 1043.5  | 0.85 | 1109.7  | 0.90 | 938.7   | 0.76 | 1199.3  | 0.98 |
| P22352    | Glutathione   | 9294    | 10412   | 1.12 | 9504.2  | 1.02 | 9810.5  | 1.06 | 9756.1  | 1.05 | 9806.6  | 1.06 | 9337.8  | 1.00 | 8045.1  | 0.87 |
| P04278    | Sex hormon    | 2653.1  | 3130.4  | 1.18 | 2779.4  | 1.05 | 2783.5  | 1.05 | 2998.7  | 1.13 | 2665.9  | 1.00 | 2874.3  | 1.08 | 2493.8  | 0.94 |
| K7ER74    | Protein APC   | 13980.3 | 13740.2 | 0.98 | 12868.2 | 0.92 | 16333.2 | 1.17 | 13350.9 | 0.95 | 13390.5 | 0.96 | 13986.8 | 1.00 | 16334.8 | 1.17 |
| Q8NF17    | FLJ00385 p    | 242.4   | 320.1   | 1.32 | 247.7   | 1.02 | 331.5   | 1.37 | 279.1   | 1.15 | 251.7   | 1.04 | 370.4   | 1.53 | 292.4   | 1.21 |
| S6BGE0    | IgG H chain   |         |         |      |         |      |         |      |         |      |         |      |         |      |         |      |
| A0A0S2Z4I | Complemen     | 3322.3  | 4095.2  | 1.23 | 3644.8  | 1.10 | 3830.2  | 1.15 | 3920.4  | 1.18 | 4101.1  | 1.23 | 4187.3  | 1.26 | 3549.1  | 1.07 |
| D3DNN4    | Carboxylic e  | 5130.5  | 5064.1  | 0.99 | 5240.3  | 1.02 | 5522.4  | 1.08 | 4966.8  | 0.97 | 5218    | 1.02 | 4797.5  | 0.94 | 4317.1  | 0.84 |
| A0A161I20 | Lactoferrin   | 879.4   | 1147.8  | 1.31 | 1147.8  | 1.31 | 1211.5  | 1.38 | 1145.7  | 1.30 | 1138.4  | 1.29 | 1107.8  | 1.26 | 981.9   | 1.12 |
| P00915    | Carbonic an   | 2002.4  | 2162.4  | 1.08 | 2609.2  | 1.30 | 1957.8  | 0.98 | 2055.7  | 1.03 | 1812.4  | 0.91 | 2027.6  | 1.01 | 2103.9  | 1.05 |
| Q9UGM5    | Fetuin-B OS   | 4107.9  | 4351.3  | 1.06 | 3769.4  | 0.92 | 4123.9  | 1.00 | 4226.1  | 1.03 | 4171.8  | 1.02 | 4422.2  | 1.08 | 3868.4  | 0.94 |
| A0A0F7G8J | Plasminoger   |         |         |      |         |      |         |      |         |      |         |      |         |      |         |      |
| Q8TCZ8    | Apolipoprot   | 380.9   | 476.4   | 1.25 | 343.4   | 0.90 | 456.2   | 1.20 | 890     | 2.34 | 571.4   | 1.50 | 559.4   | 1.47 | 698.9   | 1.83 |
| P11226    | Mannose-bin   | 1549.9  | 2010.3  | 1.30 | 1675.5  | 1.08 | 1836.5  | 1.18 | 1840.5  | 1.19 | 1926    | 1.24 | 1449.9  | 0.94 | 1492.7  | 0.96 |
| P14780    | Matrix meta   | 1462.7  | 1945.1  | 1.33 | 1718.1  | 1.17 | 1892.8  | 1.29 | 1825.1  | 1.25 | 1878.1  | 1.28 | 1733.5  | 1.19 | 1533.9  | 1.05 |
| Q9NZP8    | Complemen     | 2150.2  | 2606.4  | 1.21 | 2149.6  | 1.00 | 2431    | 1.13 | 2787.5  | 1.30 | 2422.7  | 1.13 | 2219.6  | 1.03 | 2302    | 1.07 |
| A8K3K1    | cDNA FLJ7     | 62.2    | 82.1    | 1.32 | 62.4    | 1.00 | 92.7    | 1.49 | 91.6    | 1.47 | 73.8    | 1.19 | 70.5    | 1.13 | 64.1    | 1.03 |
| P35527    | Keratin, typ  | 3567.9  | 4828.9  | 1.35 | 4184.2  | 1.17 | 4681.3  | 1.31 | 4297.7  | 1.20 | 4160.6  | 1.17 | 3806.3  | 1.07 | 3832.4  | 1.07 |
| A8KAJ3    | cDNA FLJ7     | 1343.2  | 1837.5  | 1.37 | 1648.2  | 1.23 | 1889.4  | 1.41 | 1779.4  | 1.32 | 1797    | 1.34 | 1394.9  | 1.04 | 1262.5  | 0.94 |
| Q9UHG3    | Prenylcyste   | 1396.4  | 1623    | 1.16 | 1448    | 1.04 | 1676.7  | 1.20 | 1553.9  | 1.11 | 1683.2  | 1.21 | 1543.2  | 1.11 | 1253.5  | 0.90 |
| P10720    | Platelet fact |         |         |      |         |      |         |      |         |      |         |      |         |      |         |      |
| S6B2A1    | IgG L chain   | 15.4    | 16.1    | 1.05 | 15.7    | 1.02 | 18.2    | 1.18 | 14.9    | 0.97 | 14      | 0.91 | 20.7    | 1.34 | 13.1    | 0.85 |
| B0YIW2    | Apolipoprot   | 15931.1 | 15946.8 | 1.00 | 14299.1 | 0.90 | 16740.7 | 1.05 | 12479.1 | 0.78 | 14347.2 | 0.90 | 18360.1 | 1.15 | 14244.5 | 0.89 |
| Q13790    | Apolipoprot   | 2324.8  | 2383.7  | 1.03 | 2210.3  | 0.95 | 2269.3  | 0.98 | 2033.8  | 0.87 | 2229.3  | 0.96 | 2090    | 0.90 | 1990.1  | 0.86 |
| P35908    | Keratin, typ  | 701.5   | 1259.7  | 1.80 | 955     | 1.36 | 943.1   | 1.34 | 1154.5  | 1.65 | 1302.1  | 1.86 | 818.6   | 1.17 | 752.4   | 1.07 |
| A0A024RD  | Lymphocyte    | 1247.4  | 1464.3  | 1.17 | 1267.8  | 1.02 | 1430.2  | 1.15 | 1427    | 1.14 | 1398    | 1.12 | 1284.8  | 1.03 | 1092.9  | 0.88 |
| P40197    | Platelet gly  | 882     | 992.6   | 1.13 | 1028.8  | 1.17 | 1166.6  | 1.32 | 1082.7  | 1.23 | 1030.5  | 1.17 | 1056.7  | 1.20 | 824.5   | 0.93 |
| P16070    | CD44 antige   | 3109.9  | 3521.4  | 1.13 | 3226.7  | 1.04 | 3652    | 1.17 | 3836.3  | 1.23 | 3838    | 1.23 | 3254.7  | 1.05 | 2930.4  | 0.94 |
| A0A024R93 | Proteoglycar  | 3044.2  | 4220.7  | 1.39 | 3217.9  | 1.06 | 3556.5  | 1.17 | 3585.4  | 1.18 | 3689.6  | 1.21 | 3751.3  | 1.23 | 3316.8  | 1.09 |
| A2KBC2    | Anti-(ED-B)   | 1576.5  | 1521.9  | 0.97 | 1577    | 1.00 | 1624.3  | 1.03 | 1472.1  | 0.93 | 1518.2  | 0.96 | 1839.6  | 1.17 | 1784.3  | 1.13 |
| A5YAK2    | Apolipoprot   | 3983.5  | 4272.5  | 1.07 | 3741.9  | 0.94 | 4575.6  | 1.15 | 4034    | 1.01 | 4428.9  | 1.11 | 4371    | 1.10 | 4010.6  | 1.01 |
| G3V2W1    | Protein Z-de  | 1874.1  | 2292.1  | 1.22 | 2045.7  | 1.09 | 2003.8  | 1.07 | 1918.6  | 1.02 | 2069.7  | 1.10 | 2209.2  | 1.18 | 2075.1  | 1.11 |



|           |                |         |         |      |        |      |         |      |         |      |        |      |        |      |        |      |
|-----------|----------------|---------|---------|------|--------|------|---------|------|---------|------|--------|------|--------|------|--------|------|
| A0A140VK  | Testicular se  | 2477.8  | 2812    | 1.13 | 2487.7 | 1.00 | 2736.8  | 1.10 | 2375.6  | 0.96 | 2635.4 | 1.06 | 2525.6 | 1.02 | 2230.7 | 0.90 |
| O43866    | CD5 antigen    | 1243.5  | 1335.5  | 1.07 | 1384.5 | 1.11 | 1606.8  | 1.29 | 1391.1  | 1.12 | 1358.8 | 1.09 | 1626.1 | 1.31 | 1351.8 | 1.09 |
| P01591    | Immunoglob     | 3550.8  | 3113    | 0.88 | 3322.8 | 0.94 | 3143.9  | 0.89 | 3267.3  | 0.92 | 3614.4 | 1.02 | 3594.7 | 1.01 | 3742.6 | 1.05 |
| A8K3I0    | cDNA FLJ7      | 549.7   | 652.6   | 1.19 | 540.7  | 0.98 | 621.8   | 1.13 | 590.1   | 1.07 | 595.1  | 1.08 | 527.4  | 0.96 | 506.8  | 0.92 |
| Q9H804    | cDNA FLJ1      | 156.4   | 188.7   | 1.21 | 150.8  | 0.96 | 254.6   | 1.63 | 222.8   | 1.42 | 105.8  | 0.68 | 138.6  | 0.89 | 212.9  | 1.36 |
| B0YJC6    | Vitamin K-d    | 933.3   | 1103.8  | 1.18 | 1108.9 | 1.19 | 1160.9  | 1.24 | 1103.9  | 1.18 | 913.5  | 0.98 | 890.5  | 0.95 | 832.8  | 0.89 |
| Q6UXB8    | Peptidase in   | 818.1   | 905.3   | 1.11 | 840.5  | 1.03 | 932.9   | 1.14 | 822     | 1.00 | 835.3  | 1.02 | 645.3  | 0.79 | 631.8  | 0.77 |
| B3KWB5    | cDNA FLJ4      |         |         |      |        |      |         |      |         |      |        |      |        |      |        |      |
| P08709    | Coagulation    | 328     | 407.9   | 1.24 | 288.2  | 0.88 | 410     | 1.25 | 429.3   | 1.31 | 361    | 1.10 | 314.7  | 0.96 | 263.8  | 0.80 |
| V9HWB4    | Epididymis     | 597.3   | 779.4   | 1.30 | 658    | 1.10 | 736.6   | 1.23 | 713.6   | 1.19 | 670.1  | 1.12 | 707.2  | 1.18 | 577.6  | 0.97 |
| P02741    | C-reactive p   | 1082.9  | 830.7   | 0.77 | 1080.4 | 1.00 | 1074.1  | 0.99 | 1604.3  | 1.48 | 1017.9 | 0.94 | 930.1  | 0.86 | 4798.1 | 4.43 |
| Q9UL72    | Myosin-reac    | 364.5   | 481.2   | 1.32 | 387    | 1.06 | 447.7   | 1.23 | 412.4   | 1.13 | 424.7  | 1.17 | 408.7  | 1.12 | 401.4  | 1.10 |
| P49908    | Selenoprotei   | 3441.9  | 3795    | 1.10 | 3274.3 | 0.95 | 3369.5  | 0.98 | 3224.2  | 0.94 | 3638.3 | 1.06 | 3596.3 | 1.04 | 2561.1 | 0.74 |
| V9HW12    | Epididymis     | 1538.3  | 1592.7  | 1.04 | 1603.5 | 1.04 | 1412.8  | 0.92 | 1548.9  | 1.01 | 1461.7 | 0.95 | 1574.2 | 1.02 | 1641.4 | 1.07 |
| P07359    | Platelet glyco | 2084.5  | 2648.4  | 1.27 | 2443.9 | 1.17 | 2770    | 1.33 | 2679.9  | 1.29 | 2718.9 | 1.30 | 2386.6 | 1.14 | 2117.4 | 1.02 |
| D3DQH8    | Secreted pro   | 2098    | 2082.9  | 0.99 | 1926.3 | 0.92 | 2272.4  | 1.08 | 2198    | 1.05 | 1998.8 | 0.95 | 1964.4 | 0.94 | 1970.9 | 0.94 |
| P08779    | Keratin, type  | 1452.8  | 1891.4  | 1.30 | 1570.9 | 1.08 | 1774.5  | 1.22 | 1739.5  | 1.20 | 1762.6 | 1.21 | 1580.2 | 1.09 | 1378   | 0.95 |
| P61626    | Lysozyme C     | 1103.7  | 1304.7  | 1.18 | 1215.2 | 1.10 | 1329.5  | 1.20 | 1310.4  | 1.19 | 1321.3 | 1.20 | 1230.1 | 1.11 | 1218.8 | 1.10 |
| A0A024R8Z | L-selectin O   | 1228.5  | 1334.2  | 1.09 | 1161.3 | 0.95 | 1309.8  | 1.07 | 1228.2  | 1.00 | 1343.6 | 1.09 | 1204.4 | 0.98 | 1086.6 | 0.88 |
| S6BAQ4    | IgG H chain    |         |         |      |        |      |         |      |         |      |        |      |        |      |        |      |
| Q59E93    | Membrane a     | 406     | 515.6   | 1.27 | 400.2  | 0.99 | 502.8   | 1.24 | 474.2   | 1.17 | 465    | 1.15 | 389    | 0.96 | 363.5  | 0.90 |
| A0A193CH  | 10E8 heavy     | 157.8   | 158.8   | 1.01 | 163.2  | 1.03 | 155.1   | 0.98 | 171.8   | 1.09 | 181.3  | 1.15 | 163    | 1.03 | 182.6  | 1.16 |
| Q15166    | Serum parac    | 355.2   | 388.4   | 1.09 | 362.1  | 1.02 | 443.9   | 1.25 | 424     | 1.19 | 404.1  | 1.14 | 387.6  | 1.09 | 306.9  | 0.86 |
| B2RA39    | cDNA, FLJ9     | 781.4   | 981     | 1.26 | 877    | 1.12 | 968.8   | 1.24 | 973.7   | 1.25 | 916.8  | 1.17 | 847.9  | 1.09 | 950.7  | 1.22 |
| P0DJ19    | Serum amyl     | 294.1   | 332.3   | 1.13 | 257.1  | 0.87 | 325.2   | 1.11 | 329     | 1.12 | 287.9  | 0.98 | 283.8  | 0.96 | 467.6  | 1.59 |
| P0DJ18    | Serum amyl     | 389.3   | 384.7   | 0.99 | 312.6  | 0.80 | 424.2   | 1.09 | 400.2   | 1.03 | 334.5  | 0.86 | 316.6  | 0.81 | 683.4  | 1.76 |
| A0A068LKI | Ig heavy cha   |         |         |      |        |      |         |      |         |      |        |      |        |      |        |      |
| Q15582    | Transformin    | 1222.9  | 1217.3  | 1.00 | 1181.9 | 0.97 | 1282.9  | 1.05 | 1272.7  | 1.04 | 1157.6 | 0.95 | 1193.1 | 0.98 | 1078.2 | 0.88 |
| A0A024R8C | Prostaglandi   | 727.8   | 868.5   | 1.19 | 780.4  | 1.07 | 887.8   | 1.22 | 877.6   | 1.21 | 863.8  | 1.19 | 666    | 0.92 | 610.6  | 0.84 |
| O00187    | Mannan-bin     | 1989    | 2314.3  | 1.16 | 2064   | 1.04 | 2289    | 1.15 | 2051    | 1.03 | 2010.4 | 1.01 | 1745.3 | 0.88 | 1793.4 | 0.90 |
| Q65ZC9    | Single-chain   |         |         |      |        |      |         |      |         |      |        |      |        |      |        |      |
| P18065    | Insulin-like   | 301.5   | 411.4   | 1.36 | 349.1  | 1.16 | 408.5   | 1.35 | 403.6   | 1.34 | 332.6  | 1.10 | 324.6  | 1.08 | 270.7  | 0.90 |
| A0A140TA  | Tenascin-X     | 362.7   | 402.7   | 1.11 | 380.1  | 1.05 | 427.2   | 1.18 | 385.6   | 1.06 | 348.8  | 0.96 | 371.3  | 1.02 | 319.7  | 0.88 |
| P18428    | Lipopolysac    | 996.7   | 1117.8  | 1.12 | 1038.8 | 1.04 | 1148.7  | 1.15 | 1059.3  | 1.06 | 991.4  | 0.99 | 1082.1 | 1.09 | 1446.9 | 1.45 |
| A0A1B1CY  | Vitamin D b    | 10424.2 | 10328.3 | 0.99 | 9334.3 | 0.90 | 10642.8 | 1.02 | 10623.2 | 1.02 | 7147.6 | 0.69 | 8648.4 | 0.83 | 3808.9 | 0.37 |
| A2NYQ9    | Anti-folate b  | 53.9    | 45.6    | 0.85 | 42     | 0.78 | 53.7    | 1.00 | 41.3    | 0.77 | 43.9   | 0.81 | 53.3   | 0.99 | 44.4   | 0.82 |
| Q9Y5Y7    | Lymphatic v    | 1364.9  | 1481    | 1.09 | 1276.5 | 0.94 | 1382.1  | 1.01 | 1324.6  | 0.97 | 1456   | 1.07 | 1268.8 | 0.93 | 964.9  | 0.71 |
| P02671    | Fibrinogen a   | 771.5   | 989.7   | 1.28 | 850.9  | 1.10 | 726.5   | 0.94 | 790.5   | 1.02 | 773.6  | 1.00 | 947.4  | 1.23 | 939.9  | 1.22 |
| P02533    | Keratin, type  | 55.3    | 86.1    | 1.56 | 62.7   | 1.13 | 80      | 1.45 | 78.1    | 1.41 | 73.8   | 1.33 | 79     | 1.43 | 51     | 0.92 |
| Q6EMK4    | Vasorin OS-    | 363.3   | 507     | 1.40 | 411    | 1.13 | 474.9   | 1.31 | 446.2   | 1.23 | 485.5  | 1.34 | 398    | 1.10 | 338    | 0.93 |
| A0A0S2Z42 | HCG203981      | 406.5   | 557.3   | 1.37 | 425.9  | 1.05 | 473.6   | 1.17 | 446.2   | 1.10 | 492.1  | 1.21 | 391.6  | 0.96 | 358.9  | 0.88 |
| B7Z4R8    | cDNA FLJ5      |         |         |      |        |      |         |      |         |      |        |      |        |      |        |      |
| B3KUE5    | Phospholipic   | 901.5   | 1026.7  | 1.14 | 1001.6 | 1.11 | 1132.5  | 1.26 | 1000.6  | 1.11 | 1019.8 | 1.13 | 992.1  | 1.10 | 662.1  | 0.73 |
| A2NB46    | Cold aggluti   | 397.6   | 438.5   | 1.10 | 393.2  | 0.99 | 457.3   | 1.15 | 431.9   | 1.09 | 398.7  | 1.00 | 419.1  | 1.05 | 400.9  | 1.01 |
| B2R773    | cDNA, FLJ5     | 546.2   | 835.1   | 1.53 | 1129.4 | 2.07 | 751.6   | 1.38 | 746     | 1.37 | 632.2  | 1.16 | 663.9  | 1.22 | 539.3  | 0.99 |
| A8K6K4    | cDNA FLJ7      | 1308    | 1248.6  | 0.95 | 1077.3 | 0.82 | 1346    | 1.03 | 1536.6  | 1.17 | 1482.1 | 1.13 | 1344.5 | 1.03 | 1075.5 | 0.82 |
| A0A087WX  | Cadherin-1     | 167.8   | 177.2   | 1.06 | 154.2  | 0.92 | 206.2   | 1.23 | 194.4   | 1.16 | 167    | 1.00 | 155.5  | 0.93 | 132.6  | 0.79 |

|           |               |        |        |      |        |      |        |      |        |      |        |      |        |      |        |      |
|-----------|---------------|--------|--------|------|--------|------|--------|------|--------|------|--------|------|--------|------|--------|------|
| A8K6A6    | cDNA FLJ7     | 640.8  | 759.3  | 1.18 | 704    | 1.10 | 749.6  | 1.17 | 701.3  | 1.09 | 759.5  | 1.19 | 878.3  | 1.37 | 610.8  | 0.95 |
| B3KQF4    | cDNA FLJ9     | 166.7  | 222.9  | 1.34 | 170.1  | 1.02 | 180    | 1.08 | 186.7  | 1.12 | 152.8  | 0.92 | 165.9  | 1.00 | 169.3  | 1.02 |
| A8K430    | Fructose-bis  | 111.1  | 159.5  | 1.44 | 123.1  | 1.11 | 169.1  | 1.52 | 169.2  | 1.52 | 125.7  | 1.13 | 152.2  | 1.37 | 103.7  | 0.93 |
| A0A0K0K1  | Cystatin OS   | 801.8  | 842.1  | 1.05 | 825.4  | 1.03 | 805.6  | 1.00 | 821    | 1.02 | 888.1  | 1.11 | 813    | 1.01 | 778.2  | 0.97 |
| A8K335    | cDNA FLJ7     | 626.5  | 727.5  | 1.16 | 654.2  | 1.04 | 707.8  | 1.13 | 763.3  | 1.22 | 715.1  | 1.14 | 602    | 0.96 | 560    | 0.89 |
| Q9NQ79    | Cartilage aci | 792.2  | 908.4  | 1.15 | 874.4  | 1.10 | 1227.9 | 1.55 | 829.9  | 1.05 | 874.3  | 1.10 | 746.8  | 0.94 | 679.4  | 0.86 |
| Q15485    | Ficolin-2 OS  | 1232.5 | 1636.6 | 1.33 | 1319.3 | 1.07 | 1375.2 | 1.12 | 1231.1 | 1.00 | 1469.1 | 1.19 | 1458.5 | 1.18 | 1153.2 | 0.94 |
| B4E0X1    | Beta-2-micro  | 1181.8 | 1324.5 | 1.12 | 1277   | 1.08 | 1268.4 | 1.07 | 1283.3 | 1.09 | 1219.7 | 1.03 | 1453.9 | 1.23 | 1226.4 | 1.04 |
| P05362    | Intercellular | 202.9  | 238.6  | 1.18 | 210.4  | 1.04 | 221.3  | 1.09 | 230.1  | 1.13 | 208.3  | 1.03 | 214.7  | 1.06 | 218.3  | 1.08 |
| Q76LX8    | A disintegrin | 311.2  | 543.8  | 1.75 | 327.7  | 1.05 | 425.6  | 1.37 | 395.9  | 1.27 | 310.8  | 1.00 | 349.8  | 1.12 | 260.2  | 0.84 |
| A0A075B7E | Protein IGH   |        |        |      |        |      |        |      |        |      |        |      |        |      |        |      |
| P21333    | Filamin-A C   | 123.6  | 169.3  | 1.37 | 148    | 1.20 | 168.1  | 1.36 | 169.7  | 1.37 | 144.1  | 1.17 | 141.4  | 1.14 | 110.8  | 0.90 |
| Q92496    | Complemen     | 1422.9 | 1447.6 | 1.02 | 1316   | 0.92 | 1489.3 | 1.05 | 1467.8 | 1.03 | 1465.4 | 1.03 | 1237.4 | 0.87 | 1561.3 | 1.10 |
| A0A024RD  | Phospholipa   | 431.5  | 565    | 1.31 | 425.7  | 0.99 | 544.9  | 1.26 | 555.5  | 1.29 | 541    | 1.25 | 451.2  | 1.05 | 424.7  | 0.98 |
| Q86VB7    | Scavenger re  | 167.3  | 208.9  | 1.25 | 181    | 1.08 | 222.9  | 1.33 | 208.4  | 1.25 | 189.1  | 1.13 | 157.1  | 0.94 | 166.1  | 0.99 |
| P07737    | Profilin-1 O  | 247.6  | 387.8  | 1.57 | 353.3  | 1.43 | 350.2  | 1.41 | 331.5  | 1.34 | 356.3  | 1.44 | 337.3  | 1.36 | 253.1  | 1.02 |
| P37802    | Transgelin-2  | 445.5  | 690.4  | 1.55 | 625.6  | 1.40 | 751.4  | 1.69 | 676.2  | 1.52 | 673.6  | 1.51 | 605.5  | 1.36 | 526.5  | 1.18 |
| Q13103    | Secreted phc  | 286.8  | 285.6  | 1.00 | 310.5  | 1.08 | 260.6  | 0.91 | 242.5  | 0.85 | 241.1  | 0.84 | 256.7  | 0.90 | 215.2  | 0.75 |
| B1AHL2    | Fibulin-1 OS  | 181.8  | 239.3  | 1.32 | 197.7  | 1.09 | 215.8  | 1.19 | 222.6  | 1.22 | 261.5  | 1.44 | 166    | 0.91 | 171.8  | 0.94 |
| Q59EA3    | Cadherin 5,   | 314    | 558.2  | 1.78 | 497.9  | 1.59 | 596.1  | 1.90 | 503.1  | 1.60 | 496.3  | 1.58 | 329.5  | 1.05 | 293.5  | 0.93 |
| Q0IIN1    | Keratin 77 C  |        |        |      |        |      |        |      |        |      |        |      |        |      |        |      |
| Q16853    | Membrane p    | 99.9   | 129.3  | 1.29 | 94.8   | 0.95 | 137.7  | 1.38 | 148    | 1.48 | 126.3  | 1.26 | 94.6   | 0.95 | 76.7   | 0.77 |
| P02745    | Complemen     | 2193.5 | 2073.6 | 0.95 | 2290.7 | 1.04 | 2089.9 | 0.95 | 2080.8 | 0.95 | 2050.6 | 0.93 | 2014.3 | 0.92 | 2287.5 | 1.04 |
| A0N5G5    | Rheumatoid    | 94.5   | 136.1  | 1.44 | 97.1   | 1.03 | 132.6  | 1.40 | 124.5  | 1.32 | 110.3  | 1.17 | 101.2  | 1.07 | 108.4  | 1.15 |
| Q9HCC1    | Single chain  | 19     | 31.1   | 1.64 | 15.9   | 0.84 | 22.6   | 1.19 | 19.8   | 1.04 | 18.6   | 0.98 | 20.8   | 1.09 | 18.8   | 0.99 |
| Q9Y490    | Talin-1 OS=   |        |        |      |        |      |        |      |        |      |        |      |        |      |        |      |
| P33908    | Mannosyl-ol   | 296.9  | 388.2  | 1.31 | 349.4  | 1.18 | 419.1  | 1.41 | 421.2  | 1.42 | 385.4  | 1.30 | 302.6  | 1.02 | 327    | 1.10 |
| A8K6C9    | cDNA FLJ7     | 934.1  | 1228.8 | 1.32 | 985.8  | 1.06 | 1209.8 | 1.30 | 986.1  | 1.06 | 1181.6 | 1.26 | 934.7  | 1.00 | 818.7  | 0.88 |
| A0A087WT  | Neural cell a | 888.9  | 1126.6 | 1.27 | 994.6  | 1.12 | 1094.7 | 1.23 | 1013.7 | 1.14 | 997.6  | 1.12 | 1054.1 | 1.19 | 759.1  | 0.85 |
| V9H1C1    | Gelsolin exo  |        |        |      |        |      |        |      |        |      |        |      |        |      |        |      |
| Q9HDC9    | Adipocyte p   | 668.2  | 696.8  | 1.04 | 716.8  | 1.07 | 782.3  | 1.17 | 793.5  | 1.19 | 763.3  | 1.14 | 642.7  | 0.96 | 620.9  | 0.93 |
| A0A068LLC | Ig heavy cha  | 59.3   | 55.8   | 0.94 | 60.9   | 1.03 | 56.5   | 0.95 | 48     | 0.81 | 77.1   | 1.30 | 57.8   | 0.97 | 80.2   | 1.35 |
| O00533    | Neural cell a | 308.4  | 401.8  | 1.30 | 325.1  | 1.05 | 460.4  | 1.49 | 348.5  | 1.13 | 365.9  | 1.19 | 330.3  | 1.07 | 276.8  | 0.90 |
| P35443    | Thrombospc    | 35.7   | 47.3   | 1.32 | 37.8   | 1.06 | 54.5   | 1.53 | 40.4   | 1.13 | 45.5   | 1.27 | 37.1   | 1.04 | 36.5   | 1.02 |
| P23470    | Receptor-tyr  | 147.9  | 180.8  | 1.22 | 144    | 0.97 | 201.5  | 1.36 | 200.5  | 1.36 | 186.1  | 1.26 | 134.1  | 0.91 | 104.6  | 0.71 |
| E9PR17    | CD59 glyco    | 192.7  | 191.7  | 0.99 | 175.9  | 0.91 | 212    | 1.10 | 214.1  | 1.11 | 197.9  | 1.03 | 177    | 0.92 | 156.6  | 0.81 |
| B2R9V7    | Superoxide c  | 103    | 123.8  | 1.20 | 106.3  | 1.03 | 144.8  | 1.41 | 116.1  | 1.13 | 109.3  | 1.06 | 109.1  | 1.06 | 73.1   | 0.71 |
| A0A125QY  | GCT-A9 lig    | 100.7  | 97.4   | 0.97 | 98.7   | 0.98 | 124.6  | 1.24 | 111.1  | 1.10 | 94.1   | 0.93 | 115.4  | 1.15 | 270.5  | 2.69 |
| V9HW31    | ATP synthas   | 83.6   | 149.2  | 1.78 | 140.3  | 1.68 | 154.3  | 1.85 | 152    | 1.82 | 138.6  | 1.66 | 89.4   | 1.07 | 122.9  | 1.47 |
| M9MML0    | Fc of IgG lo  | 525.7  | 649.1  | 1.23 | 555.7  | 1.06 | 596.8  | 1.14 | 601.8  | 1.14 | 549.8  | 1.05 | 534.9  | 1.02 | 510.7  | 0.97 |
| Q13201    | Multimerin-   | 484.6  | 578.8  | 1.19 | 527.2  | 1.09 | 603.9  | 1.25 | 553.1  | 1.14 | 542.8  | 1.12 | 563.8  | 1.16 | 501.9  | 1.04 |
| P05164    | Myeloperoxi   | 150.6  | 216.2  | 1.44 | 219.4  | 1.46 | 213.8  | 1.42 | 211.2  | 1.40 | 238.4  | 1.58 | 216    | 1.43 | 165.9  | 1.10 |
| B2R7D2    | cDNA, FLJC    | 180    | 201.9  | 1.12 | 179.8  | 1.00 | 203.8  | 1.13 | 180.4  | 1.00 | 175.6  | 0.98 | 167.6  | 0.93 | 145.5  | 0.81 |
| G9K388    | YWHAE/FA      | 139.1  | 382.4  | 2.75 | 307.1  | 2.21 | 367.6  | 2.64 | 384.3  | 2.76 | 322.6  | 2.32 | 149.6  | 1.08 | 340.3  | 2.45 |
| A0A125QY  | IBM-B2 hea    | 338.5  | 351.7  | 1.04 | 286.3  | 0.85 | 377.4  | 1.11 | 331.4  | 0.98 | 326.2  | 0.96 | 328.2  | 0.97 | 296.8  | 0.88 |
| A0A125QY  | GCT-A7 hea    |        |        |      |        |      |        |      |        |      |        |      |        |      |        |      |
| Q8NBP7    | Proprotein c  | 138.5  | 190.5  | 1.38 | 139.5  | 1.01 | 186.7  | 1.35 | 178    | 1.29 | 184.5  | 1.33 | 130.9  | 0.95 | 92.9   | 0.67 |

|           |                |        |        |      |        |      |        |      |        |      |        |      |        |      |        |      |
|-----------|----------------|--------|--------|------|--------|------|--------|------|--------|------|--------|------|--------|------|--------|------|
| A4D2D2    | Procollagen    | 134.5  | 157.4  | 1.17 | 139.2  | 1.03 | 137.5  | 1.02 | 118.9  | 0.88 | 136    | 1.01 | 122.5  | 0.91 | 96.7   | 0.72 |
| P07195    | L-lactate de   | 187.3  | 219    | 1.17 | 207.3  | 1.11 | 205.5  | 1.10 | 176    | 0.94 | 197.2  | 1.05 | 192.4  | 1.03 | 191.6  | 1.02 |
| E7EQ64    | Trypsin-1 O    | 329.5  | 485.9  | 1.47 | 434    | 1.32 | 340.8  | 1.03 | 333.8  | 1.01 | 442.1  | 1.34 | 322.1  | 0.98 | 229.1  | 0.70 |
| Q9UL85    | Myosin-reac    | 1213.3 | 1238.1 | 1.02 | 1267.8 | 1.04 | 1233.3 | 1.02 | 1110.3 | 0.92 | 1252.6 | 1.03 | 1142.2 | 0.94 | 1319.2 | 1.09 |
| P19320    | Vascular cel   | 119.6  | 165.9  | 1.39 | 124.6  | 1.04 | 135.8  | 1.14 | 129.9  | 1.09 | 127.7  | 1.07 | 132.7  | 1.11 | 109.2  | 0.91 |
| A0A140VJF | Testicular tis | 106.7  | 133.4  | 1.25 | 108.5  | 1.02 | 133.7  | 1.25 | 124.3  | 1.16 | 118.2  | 1.11 | 114.2  | 1.07 | 84.4   | 0.79 |
| P05019    | Insulin-like g |        |        |      |        |      |        |      |        |      |        |      |        |      |        |      |
| Q15430    | Coagulation    |        |        |      |        |      |        |      |        |      |        |      |        |      |        |      |
| A2J1N5    | Rheumatoid     | 112.9  | 128.6  | 1.14 | 126.1  | 1.12 | 218.9  | 1.94 | 147    | 1.30 | 127.4  | 1.13 | 123.3  | 1.09 | 107.3  | 0.95 |
| Q07954    | Prolow-dens    | 22.3   | 23.3   | 1.04 | 22.5   | 1.01 | 29.5   | 1.32 | 30     | 1.35 | 27.7   | 1.24 | 25.7   | 1.15 | 31.1   | 1.39 |
| P24592    | Insulin-like g | 120.4  | 139.1  | 1.16 | 119    | 0.99 | 147.8  | 1.23 | 160    | 1.33 | 139.5  | 1.16 | 141    | 1.17 | 102.9  | 0.85 |
| B2RBF5    | cDNA, FLJ5     | 95.9   | 110    | 1.15 | 98.6   | 1.03 | 119.6  | 1.25 | 98.5   | 1.03 | 117    | 1.22 | 103.3  | 1.08 | 121.3  | 1.26 |
| P12111    | Collagen alp   | 83.9   | 112.8  | 1.34 | 84.9   | 1.01 | 109    | 1.30 | 100.6  | 1.20 | 97.6   | 1.16 | 87.7   | 1.05 | 70.1   | 0.84 |
| B7Z9B1    | cDNA FLJ5      | 183.5  | 213    | 1.16 | 182    | 0.99 | 223.4  | 1.22 | 245.4  | 1.34 | 200.6  | 1.09 | 175    | 0.95 | 158.9  | 0.87 |
| B2R4R0    | Histone H4     | 266.4  | 875.9  | 3.29 | 676.1  | 2.54 | 749.1  | 2.81 | 753.8  | 2.83 | 704.1  | 2.64 | 320.6  | 1.20 | 564.9  | 2.12 |
| A8K6C1    | cDNA FLJ7      | 679.2  | 730.8  | 1.08 | 691    | 1.02 | 887    | 1.31 | 885.6  | 1.30 | 756.5  | 1.11 | 766.5  | 1.13 | 666.3  | 0.98 |
| A0N5G1    | Rheumatoid     | 236.4  | 293.3  | 1.24 | 244.9  | 1.04 | 279.1  | 1.18 | 241.5  | 1.02 | 264.9  | 1.12 | 263.1  | 1.11 | 246.1  | 1.04 |
| X6RBG4    | Uromodulin     | 174.1  | 213.9  | 1.23 | 141    | 0.81 | 221.9  | 1.27 | 221.6  | 1.27 | 205.7  | 1.18 | 147.3  | 0.85 | 149.8  | 0.86 |
| P49746    | Thrombospc     | 626.2  | 765.2  | 1.22 | 612.7  | 0.98 | 777.6  | 1.24 | 651.6  | 1.04 | 854.1  | 1.36 | 638.2  | 1.02 | 558.4  | 0.89 |
| A0A0X9UV  | MS-D4 heav     | 644.4  | 710.5  | 1.10 | 592.1  | 0.92 | 723.2  | 1.12 | 664    | 1.03 | 740.1  | 1.15 | 668.3  | 1.04 | 688.6  | 1.07 |
| P00918    | Carbonic an    | 122.8  | 163.1  | 1.33 | 160    | 1.30 | 141.6  | 1.15 | 152    | 1.24 | 162.7  | 1.32 | 170    | 1.38 | 149.8  | 1.22 |
| P08253    | 72 kDa type    |        |        |      |        |      |        |      |        |      |        |      |        |      |        |      |
| J3KPA1    | Cysteine-ric   | 1673.4 | 2029.3 | 1.21 | 1726.2 | 1.03 | 1542.2 | 0.92 | 1556.9 | 0.93 | 1752.8 | 1.05 | 1671   | 1.00 | 1279.2 | 0.76 |
| P22692    | Insulin-like g |        |        |      |        |      |        |      |        |      |        |      |        |      |        |      |
| Q4ZG40    | Macrophage     | 171.9  | 200.9  | 1.17 | 143.7  | 0.84 | 187.4  | 1.09 | 181.2  | 1.05 | 159.4  | 0.93 | 157.2  | 0.91 | 131.7  | 0.77 |
| E2RVJ0    | Anion excha    | 23.2   | 45.7   | 1.97 | 41.6   | 1.79 | 51.8   | 2.23 | 36.3   | 1.56 | 32.8   | 1.41 | 41.9   | 1.81 | 22.8   | 0.98 |
| A6NC48    | ADP-ribosyl    | 236.2  | 275.1  | 1.16 | 235.9  | 1.00 | 310.2  | 1.31 | 251.1  | 1.06 | 259.8  | 1.10 | 236.7  | 1.00 | 225.3  | 0.95 |
| Q6MZL2    | Putative unc   | 569.9  | 701.4  | 1.23 | 643.4  | 1.13 | 639.9  | 1.12 | 593    | 1.04 | 599.9  | 1.05 | 603.8  | 1.06 | 543.8  | 0.95 |
| P04040    | Catalase OS    | 182.4  | 325.4  | 1.78 | 234.3  | 1.28 | 271    | 1.49 | 208.5  | 1.14 | 178    | 0.98 | 199.2  | 1.09 | 194.1  | 1.06 |
| D3YTG3    | Target of Ne   | 153.2  | 157.3  | 1.03 | 163.3  | 1.07 | 221.3  | 1.44 | 176.3  | 1.15 | 176    | 1.15 | 133.7  | 0.87 | 123.8  | 0.81 |
| Q9UL89    | Myosin-reac    | 74.9   | 83.3   | 1.11 | 66     | 0.88 | 98.2   | 1.31 | 70.9   | 0.95 | 86     | 1.15 | 68.2   | 0.91 | 64.1   | 0.86 |
| X6R8F3    | Neutrophil g   | 264.9  | 369.7  | 1.40 | 353.7  | 1.34 | 377.1  | 1.42 | 359.3  | 1.36 | 354    | 1.34 | 316.2  | 1.19 | 289.9  | 1.09 |
| A0A024RD  | SPARC-like     | 67.4   | 108.7  | 1.61 | 78     | 1.16 | 88.3   | 1.31 | 113.9  | 1.69 | 86.9   | 1.29 | 81.4   | 1.21 | 62.4   | 0.93 |
| P35916    | Vascular enc   | 44.5   | 45.6   | 1.02 | 35.5   | 0.80 | 48.1   | 1.08 | 50.6   | 1.14 | 34.5   | 0.78 | 40.7   | 0.91 | 31.2   | 0.70 |
| B7ZMD7    | Alpha-amyl     | 35.3   | 56.2   | 1.59 | 35.9   | 1.02 | 53.3   | 1.51 | 50.1   | 1.42 | 44     | 1.25 | 49     | 1.39 | 42.1   | 1.19 |
| J3KPS3    | Fructose-bis   | 133.9  | 197.8  | 1.48 | 164.3  | 1.23 | 206.9  | 1.55 | 205.3  | 1.53 | 173.7  | 1.30 | 144.9  | 1.08 | 133.8  | 1.00 |
| Q14126    | Desmoglein-    |        |        |      |        |      |        |      |        |      |        |      |        |      |        |      |
| P23284    | Peptidyl-pro   |        |        |      |        |      |        |      |        |      |        |      |        |      |        |      |
| Q8WZ75    | Roundabout     | 152.6  | 221.9  | 1.45 | 170.2  | 1.12 | 207.2  | 1.36 | 220.8  | 1.45 | 185.4  | 1.21 | 179.8  | 1.18 | 158.2  | 1.04 |
| A0A087X1I | Calcium-dep    | 298    | 326.4  | 1.10 | 282.7  | 0.95 | 391.4  | 1.31 | 337.5  | 1.13 | 297.2  | 1.00 | 291.3  | 0.98 | 284.7  | 0.96 |
| A0A0B4J1Y | Immunoglob     |        |        |      |        |      |        |      |        |      |        |      |        |      |        |      |
| Q86YW5    | Trem-like tr   | 115.4  | 143.9  | 1.25 | 116.3  | 1.01 | 143.2  | 1.24 | 132.4  | 1.15 | 126.9  | 1.10 | 121.4  | 1.05 | 99.9   | 0.87 |
| A0A024R9J | Collectin sul  |        |        |      |        |      |        |      |        |      |        |      |        |      |        |      |
| Q6UY14    | ADAMTS-l       | 42.9   | 62.8   | 1.46 | 54.2   | 1.26 | 65.4   | 1.52 | 56.2   | 1.31 | 53.3   | 1.24 | 47     | 1.10 | 39.6   | 0.92 |
| Q6UX71    | Plexin doma    | 179.8  | 226.6  | 1.26 | 197.4  | 1.10 | 227.5  | 1.27 | 181.4  | 1.01 | 199.7  | 1.11 | 211.7  | 1.18 | 150.5  | 0.84 |
| P03950    | Angiogenin     | 363.2  | 420    | 1.16 | 390.8  | 1.08 | 489.1  | 1.35 | 518.6  | 1.43 | 472.9  | 1.30 | 389.7  | 1.07 | 343.2  | 0.94 |
| Q05639    | Elongation f   | 40.3   | 127.6  | 3.17 | 111.4  | 2.76 | 84.2   | 2.09 | 85.3   | 2.12 | 136.9  | 3.40 | 56.2   | 1.39 | 104.1  | 2.58 |

|           |                |        |        |      |        |      |        |      |        |      |        |      |        |      |        |      |
|-----------|----------------|--------|--------|------|--------|------|--------|------|--------|------|--------|------|--------|------|--------|------|
| Q59ED3    | Intercellular  | 68.1   | 87.6   | 1.29 | 66     | 0.97 | 99.7   | 1.46 | 102.8  | 1.51 | 70     | 1.03 | 66     | 0.97 | 56.5   | 0.83 |
| Q8NGE6    | Olfactory re   | 1201.7 | 1274.4 | 1.06 | 1087.1 | 0.90 | 1695.4 | 1.41 | 1970.5 | 1.64 | 1579.6 | 1.31 | 898.4  | 0.75 | 1144.2 | 0.95 |
| P07333    | Macrophage     | 32.6   | 52.1   | 1.60 | 37.1   | 1.14 | 42.2   | 1.29 | 44.6   | 1.37 | 33.9   | 1.04 | 37.4   | 1.15 | 31.8   | 0.98 |
| Q9H8L6    | Multimerin-    | 160.8  | 227.9  | 1.42 | 155.2  | 0.97 | 220    | 1.37 | 188.5  | 1.17 | 186.5  | 1.16 | 178.5  | 1.11 | 142.2  | 0.88 |
| P04066    | Tissue alpha   | 124.2  | 152.2  | 1.23 | 118.8  | 0.96 | 179.1  | 1.44 | 166.6  | 1.34 | 134.4  | 1.08 | 125    | 1.01 | 104    | 0.84 |
| A8K7T4    | cDNA FLJ7      |        |        |      |        |      |        |      |        |      |        |      |        |      |        |      |
| A0A140VJC | Testicular tis | 134.5  | 139.9  | 1.04 | 137    | 1.02 | 167.7  | 1.25 | 161.9  | 1.20 | 160.1  | 1.19 | 141.1  | 1.05 | 137.8  | 1.02 |
| A0A1C9J6F | B cell recept  | 61.6   | 87.8   | 1.43 | 61.3   | 1.00 | 96.2   | 1.56 | 87.2   | 1.42 | 86.2   | 1.40 | 79     | 1.28 | 58.1   | 0.94 |
| B4DZM1    | cDNA FLJ5      | 1025.2 | 1136   | 1.11 | 998.7  | 0.97 | 907.2  | 0.88 | 924.7  | 0.90 | 1086.3 | 1.06 | 1158.3 | 1.13 | 1028.7 | 1.00 |
| A0A024R6V | Dipeptidase    |        |        |      |        |      |        |      |        |      |        |      |        |      |        |      |
| Q4LE64    | NUMA1 var      | 802.5  | 1029.2 | 1.28 | 821    | 1.02 | 1000.5 | 1.25 | 1075   | 1.34 | 1117.1 | 1.39 | 684    | 0.85 | 571.4  | 0.71 |
| P11279    | Lysosome-ac    | 238.8  | 315.2  | 1.32 | 278.2  | 1.16 | 311.7  | 1.31 | 266.4  | 1.12 | 250.5  | 1.05 | 229.6  | 0.96 | 221.9  | 0.93 |
| Q99784    | Noelin OS=     | 236.4  | 230.4  | 0.97 | 224.4  | 0.95 | 214.6  | 0.91 | 214.5  | 0.91 | 211.6  | 0.90 | 203.3  | 0.86 | 219.5  | 0.93 |
| Q9UIU0    | Dihydropyri    | 64.3   | 86.9   | 1.35 | 72.3   | 1.12 | 95.2   | 1.48 | 65.3   | 1.02 | 68.7   | 1.07 | 75.9   | 1.18 | 56.5   | 0.88 |
| P07998    | Ribonucleas    | 34.2   | 36.7   | 1.07 | 32     | 0.94 | 38.4   | 1.12 | 41.7   | 1.22 | 42.1   | 1.23 | 36.3   | 1.06 | 29.5   | 0.86 |
| K4DIA0    | ICOS ligand    | 522.3  | 570.7  | 1.09 | 574.2  | 1.10 | 552.6  | 1.06 | 517.5  | 0.99 | 534.7  | 1.02 | 498.4  | 0.95 | 476.9  | 0.91 |
| Q9ULV0    | Unconventic    | 53.7   | 63.5   | 1.18 | 46.6   | 0.87 | 53.9   | 1.00 | 82.8   | 1.54 | 56     | 1.04 | 64.5   | 1.20 | 84.6   | 1.58 |
| O14786    | Neuropilin-1   |        |        |      |        |      |        |      |        |      |        |      |        |      |        |      |
| B7Z3G0    | cDNA FLJ5      | 295.9  | 219.8  | 0.74 | 169.4  | 0.57 | 259.1  | 0.88 | 320.3  | 1.08 | 272.7  | 0.92 | 313.1  | 1.06 | 191.9  | 0.65 |
| Q99969    | Retinoic aci   | 40.7   | 55.7   | 1.37 | 50.7   | 1.25 | 68.1   | 1.67 | 56.8   | 1.40 | 50.2   | 1.23 | 45.7   | 1.12 | 42.4   | 1.04 |
| Q9HCI6    | E3 SUMO-f      | 247.6  | 303.5  | 1.23 | 614.6  | 2.48 | 350.2  | 1.41 | 420.3  | 1.70 | 379.6  | 1.53 | 224.3  | 0.91 | 259.3  | 1.05 |
| A0A087WV  | Receptor-tyr   | 58     | 75     | 1.29 | 66.9   | 1.15 | 70.1   | 1.21 | 55     | 0.95 | 58.1   | 1.00 | 70     | 1.21 | 55     | 0.95 |
| P67936    | Tropomyosin    | 328.1  | 474    | 1.44 | 453.2  | 1.38 | 532.2  | 1.62 | 517.2  | 1.58 | 458.3  | 1.40 | 433.9  | 1.32 | 343.7  | 1.05 |
| A0A024RC  | Peroxisome     | 446.8  | 477.6  | 1.07 | 483.8  | 1.08 | 540.7  | 1.21 | 509.1  | 1.14 | 603.2  | 1.35 | 356.8  | 0.80 | 456.9  | 1.02 |
| P98160    | Basement m     | 91.9   | 180.2  | 1.96 | 126.8  | 1.38 | 126.6  | 1.38 | 132.4  | 1.44 | 138.4  | 1.51 | 159.1  | 1.73 | 95.7   | 1.04 |
| A0A0S4XQ  | MHC Class      |        |        |      |        |      |        |      |        |      |        |      |        |      |        |      |
| Q8IY21    | Probable AT    | 795    | 976.1  | 1.23 | 858.9  | 1.08 | 1005.7 | 1.27 | 930.4  | 1.17 | 1047.1 | 1.32 | 730.4  | 0.92 | 754.9  | 0.95 |
| A0A0U1RR  | Histone H2A    | 218.4  | 257.8  | 1.18 | 229.1  | 1.05 | 272.6  | 1.25 | 266.6  | 1.22 | 263.5  | 1.21 | 232.6  | 1.07 | 186    | 0.85 |
| G3XAI2    | Laminin sub    | 99.6   | 118.5  | 1.19 | 108.6  | 1.09 | 150.7  | 1.51 | 133.7  | 1.34 | 113.4  | 1.14 | 107.6  | 1.08 | 80.6   | 0.81 |
| C9JC84    | Fibrinogen g   |        |        |      |        |      |        |      |        |      |        |      |        |      |        |      |
| Q9H7P6    | Multivesicul   |        |        |      |        |      |        |      |        |      |        |      |        |      |        |      |
| B7Z351    | Secreted phc   | 40.3   | 47.7   | 1.18 | 36.1   | 0.90 | 40.2   | 1.00 | 46.4   | 1.15 | 41.8   | 1.04 | 46.3   | 1.15 | 34.7   | 0.86 |
| Q9BWP8    | Collectin-11   | 18.3   | 36     | 1.97 | 28.1   | 1.54 | 40.2   | 2.20 | 40.5   | 2.21 | 40.3   | 2.20 | 21.1   | 1.15 | 16.9   | 0.92 |
| A0A024QZ  | Serine/threo   | 359.7  | 297.4  | 0.83 | 286.2  | 0.80 | 380.1  | 1.06 | 538.4  | 1.50 | 430    | 1.20 | 246.8  | 0.69 | 223.6  | 0.62 |
| A0A024QZ  | Proteoglycar   | 132.4  | 161.4  | 1.22 | 127.2  | 0.96 | 176.4  | 1.33 | 128.5  | 0.97 | 136.2  | 1.03 | 156.7  | 1.18 | 108.9  | 0.82 |
| A8K9X5    | cDNA FLJ7      | 1282.7 | 1183.1 | 0.92 | 1057.9 | 0.82 | 1665   | 1.30 | 1951.7 | 1.52 | 1903.3 | 1.48 | 2038.2 | 1.59 | 880.6  | 0.69 |
| P11717    | Cation-indep   |        |        |      |        |      |        |      |        |      |        |      |        |      |        |      |
| A0A024R2V | Dystroglycar   |        |        |      |        |      |        |      |        |      |        |      |        |      |        |      |
| D6W5L6    | Pulmonary s    | 27.1   | 35.8   | 1.32 | 23.6   | 0.87 | 32.4   | 1.20 | 34.2   | 1.26 | 28.6   | 1.06 | 30.3   | 1.12 | 38.6   | 1.42 |
| P20023    | Complement     |        |        |      |        |      |        |      |        |      |        |      |        |      |        |      |
| A0A060VC  | MHC class I    | 1005.6 | 990.7  | 0.99 | 1154.2 | 1.15 | 874.8  | 0.87 | 858.5  | 0.85 | 929.5  | 0.92 | 1310.8 | 1.30 | 899.2  | 0.89 |
| A8K2T7    | Receptor pro   |        |        |      |        |      |        |      |        |      |        |      |        |      |        |      |
| A0A024R1C | Contactin 1,   | 41.9   | 50     | 1.19 | 47.3   | 1.13 | 56.2   | 1.34 | 40.4   | 0.96 | 46.9   | 1.12 | 43.8   | 1.05 | 29.5   | 0.70 |
| Q9BTY2    | Plasma alph    | 237.3  | 282.1  | 1.19 | 242.6  | 1.02 | 252.4  | 1.06 | 280.7  | 1.18 | 273.7  | 1.15 | 242.1  | 1.02 | 220.1  | 0.93 |
| Q8IXL6    | Extracellular  | 121.2  | 88.7   | 0.73 | 82.9   | 0.68 | 112.4  | 0.93 | 78.9   | 0.65 | 103.9  | 0.86 | 92.9   | 0.77 | 48.6   | 0.40 |
| A0A075B6F | Dynein heav    | 130.9  | 147.4  | 1.13 | 89.2   | 0.68 | 150.5  | 1.15 | 147.8  | 1.13 | 144.5  | 1.10 | 106.1  | 0.81 | 77     | 0.59 |
| A0A087WX  | IgGfc-bindin   | 260.4  | 310.1  | 1.19 | 245.6  | 0.94 | 327.3  | 1.26 | 268    | 1.03 | 250    | 0.96 | 265.7  | 1.02 | 235.5  | 0.90 |



|           |               |       |       |      |       |      |       |      |       |      |       |      |       |      |       |      |
|-----------|---------------|-------|-------|------|-------|------|-------|------|-------|------|-------|------|-------|------|-------|------|
| Q99727    | Metalloprote  | 135   | 93.4  | 0.69 | 109.7 | 0.81 | 130.5 | 0.97 | 142.1 | 1.05 | 111.3 | 0.82 | 116.6 | 0.86 | 118.5 | 0.88 |
| Q0ZCH6    | Immunglobu    | 71.2  | 85.4  | 1.20 | 69.3  | 0.97 | 100   | 1.40 | 97.9  | 1.38 | 77.4  | 1.09 | 76.1  | 1.07 | 67.1  | 0.94 |
| Q9UNN8    | Endothelial   | 148.8 | 146.2 | 0.98 | 153.2 | 1.03 | 181.9 | 1.22 | 174.8 | 1.17 | 162.8 | 1.09 | 146.9 | 0.99 | 150.4 | 1.01 |
| A0A0C4DG  | Poliovirus re | 336.2 | 336   | 1.00 | 313.3 | 0.93 | 359.9 | 1.07 | 385.4 | 1.15 | 333.7 | 0.99 | 411   | 1.22 | 253.4 | 0.75 |
| J3KNB4    | Cathelicidin  | 316.2 | 351.3 | 1.11 | 340.1 | 1.08 | 421   | 1.33 | 395.6 | 1.25 | 385.8 | 1.22 | 382.4 | 1.21 | 289.6 | 0.92 |
| Q96RZ2    | N-acetylgluc  | 45    | 70.6  | 1.57 | 65.6  | 1.46 | 59.8  | 1.33 | 47.2  | 1.05 | 49.8  | 1.11 | 40    | 0.89 | 42.2  | 0.94 |
| Q4LE33    | TNC variant   |       |       |      |       |      |       |      |       |      |       |      |       |      |       |      |
| A8K486    | Peptidyl-pro  | 9.5   | 24.4  | 2.57 | 19    | 2.00 | 13.1  | 1.38 | 15.1  | 1.59 | 13.1  | 1.38 | 13.8  | 1.45 | 8.2   | 0.86 |
| B2R6V9    | cDNA, FLJ5    | 52.7  | 69.4  | 1.32 | 56.9  | 1.08 | 69.2  | 1.31 | 56.4  | 1.07 | 69.9  | 1.33 | 60.9  | 1.16 | 37.2  | 0.71 |
| Q16706    | Alpha-mann    |       |       |      |       |      |       |      |       |      |       |      |       |      |       |      |
| H3BQD0    | Cerebellin-1  | 13    | 13.6  | 1.05 | 18.9  | 1.45 | 16.2  | 1.25 | 12    | 0.92 | 15.3  | 1.18 | 18.1  | 1.39 | 12.7  | 0.98 |
| Q86U17    | Serpin A11    | 54    | 74    | 1.37 | 58.2  | 1.08 | 76.4  | 1.41 | 76.2  | 1.41 | 78.9  | 1.46 | 89.4  | 1.66 | 54    | 1.00 |
| A0A140VK  | Leukotriene   | 31.4  | 35.1  | 1.12 | 29    | 0.92 | 31.9  | 1.02 | 27.7  | 0.88 | 33.2  | 1.06 | 24    | 0.76 | 28.4  | 0.90 |
| A0A140GX  | Platelet mem  | 40.9  | 62.2  | 1.52 | 51.3  | 1.25 | 81.4  | 1.99 | 44.4  | 1.09 | 39.6  | 0.97 | 41.9  | 1.02 | 35.7  | 0.87 |
| Q96S96    | Phosphatidy   | 32.3  | 34.8  | 1.08 | 29    | 0.90 | 43.1  | 1.33 | 35    | 1.08 | 33.3  | 1.03 | 46.8  | 1.45 | 26.7  | 0.83 |
| O00151    | PDZ and LI    | 78.2  | 103.2 | 1.32 | 93.2  | 1.19 | 99.7  | 1.27 | 104.3 | 1.33 | 97.3  | 1.24 | 94.3  | 1.21 | 70.4  | 0.90 |
| A0A068B0  | Cis-AB glyc   | 74.1  | 92.9  | 1.25 | 74.9  | 1.01 | 93.7  | 1.26 | 95.4  | 1.29 | 75.6  | 1.02 | 124.2 | 1.68 | 72.3  | 0.98 |
| Q6YHK3    | CD109 antig   | 163.1 | 197.5 | 1.21 | 155.1 | 0.95 | 190.1 | 1.17 | 219.3 | 1.34 | 176.1 | 1.08 | 195.4 | 1.20 | 149.5 | 0.92 |
| B3KSS6    | Phosphodies   | 385.6 | 316.3 | 0.82 | 291.1 | 0.75 | 329.9 | 0.86 | 343.6 | 0.89 | 295.2 | 0.77 | 417.6 | 1.08 | 321.5 | 0.83 |
| B4DQY7    | cDNA FLJ5     | 15.6  | 22.3  | 1.43 | 20.1  | 1.29 | 20.8  | 1.33 | 17.9  | 1.15 | 17.2  | 1.10 | 20    | 1.28 | 22.6  | 1.45 |
| A0A024RD  | Periostin, os |       |       |      |       |      |       |      |       |      |       |      |       |      |       |      |
| P06733    | Alpha-enola   | 49.7  | 71.8  | 1.44 | 57.6  | 1.16 | 92.1  | 1.85 | 66.6  | 1.34 | 70    | 1.41 | 62.9  | 1.27 | 52.2  | 1.05 |
| Q86SQ4    | Adhesion G-   |       |       |      |       |      |       |      |       |      |       |      |       |      |       |      |
| Q8TER0    | Sushi, nidog  |       |       |      |       |      |       |      |       |      |       |      |       |      |       |      |
| A1L4H1    | Soluble scav  |       |       |      |       |      |       |      |       |      |       |      |       |      |       |      |
| Q13740    | CD166 antig   | 39.8  | 60    | 1.51 | 43.9  | 1.10 | 54.1  | 1.36 | 50.8  | 1.28 | 48.3  | 1.21 | 47    | 1.18 | 37.2  | 0.93 |
| O94818    | Nucleolar pr  | 60.9  | 66.8  | 1.10 | 54.2  | 0.89 | 83    | 1.36 | 70.8  | 1.16 | 68.8  | 1.13 | 56.3  | 0.92 | 44.9  | 0.74 |
| P06703    | Protein S100  |       |       |      |       |      |       |      |       |      |       |      |       |      |       |      |
| D3DPK5    | SH3 domain    | 63.5  | 99    | 1.56 | 106.2 | 1.67 | 123.2 | 1.94 | 78.5  | 1.24 | 81.8  | 1.29 | 83.4  | 1.31 | 85    | 1.34 |
| E9PK25    | Cofilin-1 OS  |       |       |      |       |      |       |      |       |      |       |      |       |      |       |      |
| A0A125U0  | GCT-A2 hea    | 18.9  | 24.4  | 1.29 | 19.9  | 1.05 | 30.3  | 1.60 | 26.6  | 1.41 | 20.8  | 1.10 | 26.9  | 1.42 | 15.2  | 0.80 |
| D6W5K2    | Thymosin, b   | 88    | 215   | 2.44 | 183.4 | 2.08 | 144.4 | 1.64 | 169.2 | 1.92 | 204.7 | 2.33 | 181.3 | 2.06 | 76.5  | 0.87 |
| Q6PIY7    | Poly(A) RN    | 67.2  | 60.9  | 0.91 | 63.3  | 0.94 | 61.6  | 0.92 | 56.5  | 0.84 | 52.3  | 0.78 | 61.6  | 0.92 | 43    | 0.64 |
| Q96AN5    | Transmembr    | 90    | 156.9 | 1.74 | 268.8 | 2.99 | 443.2 | 4.92 | 179.8 | 2.00 | 136.5 | 1.52 | 83.9  | 0.93 | 93.9  | 1.04 |
| Q6P4F1    | Alpha-(1,3)-  |       |       |      |       |      |       |      |       |      |       |      |       |      |       |      |
| Q9UL82    | Myosin-reac   |       |       |      |       |      |       |      |       |      |       |      |       |      |       |      |
| Q7Z7M0    | Multiple epi  |       |       |      |       |      |       |      |       |      |       |      |       |      |       |      |
| Q2KHR2    | DNA-bindin    |       |       |      |       |      |       |      |       |      |       |      |       |      |       |      |
| Q75KY0    | Putative unc  |       |       |      |       |      |       |      |       |      |       |      |       |      |       |      |
| V9HVY1    | Epididymis    | 51.6  | 85.5  | 1.66 | 127.8 | 2.48 | 209.8 | 4.07 | 85.8  | 1.66 | 64.8  | 1.26 | 51.9  | 1.01 | 68    | 1.32 |
| Q59EB6    | Complemen     | 49.4  | 66.1  | 1.34 | 46.1  | 0.93 | 55.1  | 1.12 | 58.8  | 1.19 | 50.3  | 1.02 | 63.9  | 1.29 | 59.5  | 1.20 |
| Q13131    | 5'-AMP-acti   |       |       |      |       |      |       |      |       |      |       |      |       |      |       |      |
| Q96RR4    | Calcium/cal   |       |       |      |       |      |       |      |       |      |       |      |       |      |       |      |
| A0A0R4J2F | Spermatogei   | 22.3  | 78.2  | 3.51 | 53.8  | 2.41 | 56.5  | 2.53 | 70.6  | 3.17 | 68.9  | 3.09 | 36.4  | 1.63 | 52.8  | 2.37 |
| P25391    | Laminin sub   | 67.6  | 83.6  | 1.24 | 71.2  | 1.05 | 80.7  | 1.19 | 80.8  | 1.20 | 84.7  | 1.25 | 74    | 1.09 | 49.1  | 0.73 |
| A0A0G2JN  | Transcriptio  |       |       |      |       |      |       |      |       |      |       |      |       |      |       |      |
| E5RG27    | Casein kinas  | 115.8 | 125   | 1.08 | 109   | 0.94 | 168.1 | 1.45 | 173.4 | 1.50 | 152.4 | 1.32 | 80    | 0.69 | 88.9  | 0.77 |
